# Supplementary material for: The effect of food intake on gene expression in human peripheral blood
Source: PubMed Central journal article supplement — Hum Mol Genet. 2009 Oct 16;19(1):159–69. doi: 10.1093/hmg/ddp476 (PMC2792154; doi:10.1093/hmg/ddp476), 2009-10-16
Supplement: ddp476_1.pdf [file ddp476_1.pdf]

## **SUPPLEMENTARY INFORMATION FOR:**

### **The effect of food intake on gene expression in human peripheral blood**

Amy S. Leonardson<sup>1†</sup>, Jun Zhu<sup>1†</sup>, Yanqing Chen<sup>1</sup>, Kai Wang<sup>1</sup>, John R. Lamb<sup>1</sup>, Marc Reitman<sup>2</sup>, Valur Emilsson<sup>1\*</sup>, Eric E. Schadt<sup>1\*</sup>

<sup>1</sup>Rosetta Inpharmatics, LLC, a wholly owned subsidiary of Merck & Co., Inc., 401 Terry Ave. N., Seattle, WA 98109, USA; <sup>2</sup>Department of Clinical Pharmacology, Merck & Co., Inc., 126 E. Lincoln Avenue, Rahway, NJ 07065-0900, USA

<sup>†</sup>These authors contributed equally.

\* Address correspondence to: Valur Emilsson ([valur\\_emilsson@merck.com](mailto:valur_emilsson@merck.com)) or Eric E. Schadt ([eric.schadt@gmail.com](mailto:eric.schadt@gmail.com))

## Supplementary Figures

**Supplementary Figure 1** Overlaps of modules between fast and fed coexpression networks. A black cell means two modules in fast and fed networks significantly overlap (Fisher Exact Test p-value <0.01 after multiple testing correction).

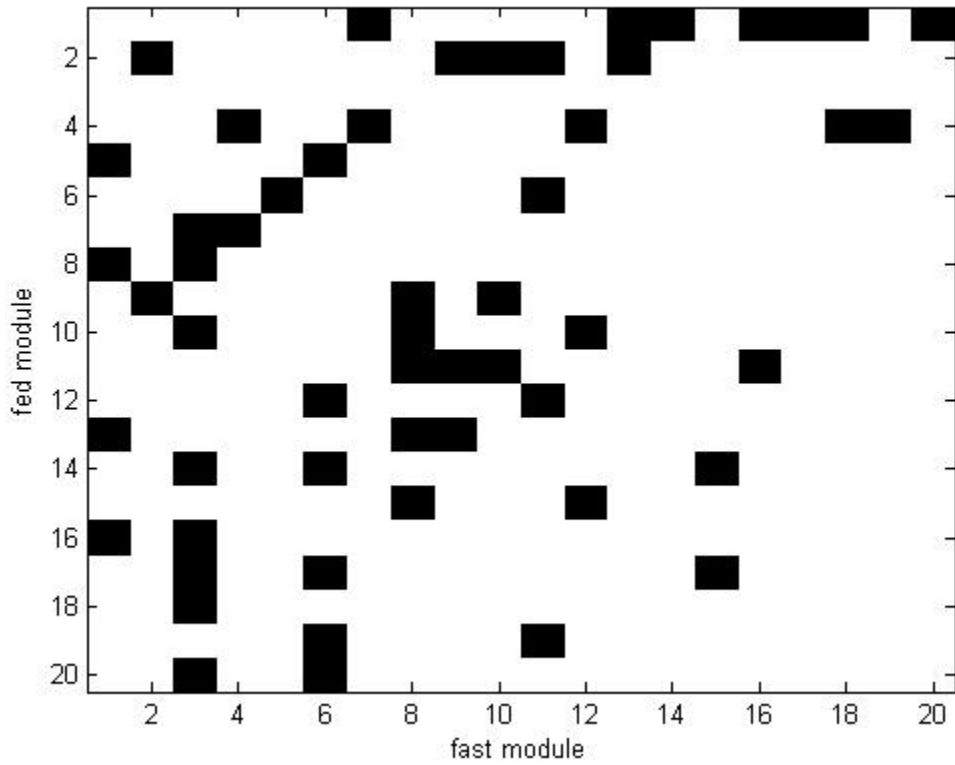

**Supplementary Figure 2** Distributions of probe intensities for all transcripts on the chip and transcripts responding to food intake.

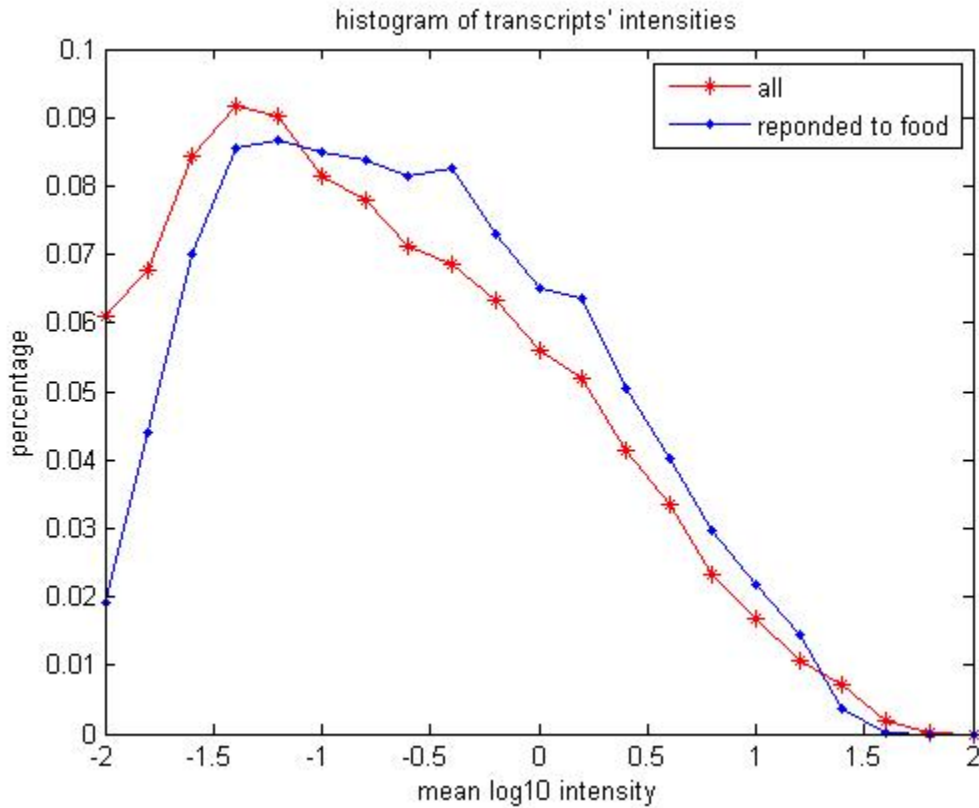

## Supplementary Tables

**Supplementary Table 1** Clinical information collected for each participant.

**Supplementary Table 2** Gene expression traits with individual variation, temporal variation or responding to feeding based on two-way ANOVA or three-way ANOVA and mixed effect model.

**Supplementary Table 3** Enriched GO Biological processes for the 11,003 genes identified over both arms and time periods of the study population with a significant time and individual component. All p-values reported are after multiple testing correction.

**Supplementary Table 4** Expression traits used in the elasticNet classifier for classifying fast/fed states.

**Supplementary Table 5** Enriched correlated clinical traits in the Iceland Family Cohort study for genes (a) differentially expressed (DE) or (b) differentially connected (DC) between fast and fed states at each time point. All p-value reported are after multiple testing correction.

**Supplementary Table 6** Enriched GO Biological processes for the genes in coexpression network modules at fast time point 3. All p-values reported are after multiple testing correction.

**Supplementary Table 7** Enriched GO Biological processes for the genes in coexpression network modules at fed time point 3. All p-values reported are after multiple testing correction.

**Supplementary Table 8** Enriched correlated clinical traits for the genes in coexpression network modules at fast time point 3. All p-values reported are after multiple testing correction.

**Supplementary Table 9** Enriched correlated clinical traits for the genes in coexpression network modules at fed time point 3. All p-values reported are after multiple testing correction.



**Supplementary Table 1**

| <b>trait name</b>                        | <b>mean</b> | <b>std</b> | <b>min</b> | <b>max</b> |
|------------------------------------------|-------------|------------|------------|------------|
| Leptin                                   | 7.58        | 6.75       | 1          | 32.2       |
| Sex                                      | 1           | 0          | 1          | 1          |
| Total Cholesterol                        | 5.51        | 0.98       | 3.1        | 7.8        |
| HDL Cholesterol                          | 1.33        | 0.3        | 0.6        | 2.03       |
| LDL Cholesterol                          | 3.69        | 0.87       | 1.38       | 5.77       |
| Triglycerides                            | 1.34        | 1.21       | 0.42       | 9.98       |
| Glucose                                  | 4.89        | 0.41       | 3.6        | 6.1        |
| Creatinine                               | 98.94       | 7.04       | 82         | 115        |
| C-reactive protein (CRP)                 | 1.83        | 3          | 0.2        | 17         |
| Alanine aminotransferase (ALT)           | 36.99       | 22.7       | 14         | 147        |
| Insulin                                  | 7.65        | 4.63       | 0.6        | 23.87      |
| White Blood Cell count (WBC)             | 6.33        | 1.51       | 4.2        | 15.4       |
| Neutrophils                              | 2.94        | 1.3        | 1.5        | 12.4       |
| Lymphocytes                              | 2.54        | 0.62       | 1.5        | 4.3        |
| Monocytes                                | 0.62        | 0.17       | 0.4        | 1.2        |
| Eosinophils                              | 0.22        | 0.11       | 0.1        | 0.6        |
| Basophils                                | 0.01        | 0.02       | 0          | 0.1        |
| Red Blood Cell count                     | 4.91        | 0.3        | 4.22       | 5.56       |
| Hemoglobin                               | 148.93      | 8.18       | 134        | 165        |
| Hematocrit                               | 0.44        | 0.02       | 0.39       | 0.49       |
| Thrombocytes (Platelets)                 | 248.43      | 47.95      | 157        | 376        |
| Mean Corpuscular Hemoglobin (MCH)        | 30.38       | 1.23       | 27.4       | 32.9       |
| Mean Corpuscular Volume (MCV)            | 90.07       | 3.5        | 82.4       | 97.1       |
| Mean Corpuscular Hemoglobin Concentratio | 337.14      | 4.75       | 326        | 350        |
| Sleep Time                               | 6.4         | 0.83       | 4          | 8          |
| Height                                   | 1.83        | 0.06       | 1.68       | 1.97       |
| Weight                                   | 85.97       | 11.39      | 66.2       | 113.6      |
| BMI                                      | 25.55       | 2.65       | 21.5       | 31.7       |
| FAT (PBF)                                | 20.9        | 4.59       | 11.9       | 33.7       |
| Tissue Electrical Resistance             | 494.63      | 45.81      | 427        | 614        |
| Basic Metabolic Energy Demand (BMED)     | 8011.73     | 715.8      | 6495       | 9714       |
| FAT_W (BFM)                              | 18.37       | 6.16       | 8          | 32.3       |
| Lean Body Weight                         | 67.27       | 6.11       | 52.4       | 84.6       |
| Water Weight                             | 49.73       | 5.72       | 38.4       | 81.7       |
| Max Hip Circumference                    | 107.1       | 9.26       | 90         | 130        |
| Max Waist Circumference                  | 84.03       | 9.87       | 60         | 112        |
| Systolic Blood Pressure                  | 103.49      | 14.85      | 78         | 134        |
| Diastolic Blood Pressure                 | 89.34       | 16.37      | 58         | 116        |
| Ghrelin                                  | 80.87       | 53.96      | 20.2       | 249.1      |
| Age                                      | 38.88       | 5.52       | 29         | 50         |

**Supplementary Table 2** ANOVA and mixed effect model results. Significant results (p-value < 0.01) are indicated for each of six different tests.

| Transcript_ID | Two-way ANOVA, Individual Dimension | Two-way ANOVA, Time Dimension | Three-way ANOVA, Individual Dimension | Three-way ANOVA, Time Dimension | Three-way ANOVA, Fast/Fed State Dimension | mixed effect model to detect differences in fast/fed states |
|---------------|-------------------------------------|-------------------------------|---------------------------------------|---------------------------------|-------------------------------------------|-------------------------------------------------------------|
| AA470152_RC   | 1                                   | 1                             | 1                                     | 1                               | 0                                         | 0                                                           |
| AA555029_RC   | 1                                   | 1                             | 1                                     | 1                               | 0                                         | 1                                                           |
| AA598803_RC   | 1                                   | 0                             | 1                                     | 0                               | 1                                         | 1                                                           |
| AA644150_RC   | 0                                   | 0                             | 0                                     | 0                               | 0                                         | 1                                                           |
| AA766897_RC   | 1                                   | 1                             | 1                                     | 1                               | 1                                         | 1                                                           |
| AA993127_RC   | 1                                   | 1                             | 1                                     | 0                               | 0                                         | 1                                                           |
| AB002308      | 1                                   | 0                             | 1                                     | 0                               | 1                                         | 1                                                           |
| AB002314      | 0                                   | 0                             | 1                                     | 0                               | 0                                         | 0                                                           |
| AB002316      | 1                                   | 0                             | 0                                     | 0                               | 0                                         | 1                                                           |
| AB002321      | 1                                   | 0                             | 1                                     | 0                               | 0                                         | 0                                                           |
| AB002324      | 1                                   | 1                             | 1                                     | 1                               | 0                                         | 1                                                           |
| AB002330      | 1                                   | 0                             | 1                                     | 1                               | 1                                         | 1                                                           |
| AB002337      | 1                                   | 1                             | 1                                     | 1                               | 0                                         | 0                                                           |
| AB002339      | 1                                   | 0                             | 1                                     | 1                               | 1                                         | 0                                                           |
| AB002344      | 1                                   | 1                             | 1                                     | 1                               | 1                                         | 1                                                           |
| AB002348      | 1                                   | 1                             | 1                                     | 1                               | 1                                         | 0                                                           |
| AB002354      | 1                                   | 1                             | 1                                     | 1                               | 0                                         | 1                                                           |
| AB002361      | 1                                   | 1                             | 1                                     | 1                               | 0                                         | 1                                                           |
| AB002365      | 1                                   | 0                             | 1                                     | 0                               | 0                                         | 1                                                           |
| AB002366      | 1                                   | 0                             | 1                                     | 1                               | 1                                         | 1                                                           |
| AB002368      | 1                                   | 0                             | 1                                     | 1                               | 1                                         | 1                                                           |
| AB002373      | 1                                   | 0                             | 1                                     | 1                               | 1                                         | 0                                                           |
| AB002374      | 1                                   | 1                             | 1                                     | 1                               | 1                                         | 0                                                           |
| AB002377      | 1                                   | 1                             | 1                                     | 1                               | 0                                         | 1                                                           |
| AB002438      | 0                                   | 0                             | 1                                     | 0                               | 0                                         | 1                                                           |
| AB002445      | 1                                   | 1                             | 1                                     | 1                               | 1                                         | 1                                                           |
| AB006622      | 1                                   | 1                             | 1                                     | 1                               | 0                                         | 0                                                           |
| AB006624      | 1                                   | 0                             | 1                                     | 1                               | 1                                         | 1                                                           |
| AB006627      | 0                                   | 0                             | 0                                     | 0                               | 1                                         | 0                                                           |
| AB006631      | 1                                   | 1                             | 1                                     | 1                               | 1                                         | 0                                                           |
| AB007857      | 1                                   | 1                             | 1                                     | 1                               | 1                                         | 1                                                           |
| AB007861      | 1                                   | 0                             | 1                                     | 1                               | 1                                         | 1                                                           |
| AB007863      | 1                                   | 1                             | 1                                     | 1                               | 1                                         | 1                                                           |
| AB007864      | 1                                   | 1                             | 1                                     | 1                               | 1                                         | 1                                                           |
| AB007880      | 1                                   | 1                             | 1                                     | 1                               | 0                                         | 0                                                           |
| AB007883      | 1                                   | 0                             | 1                                     | 0                               | 1                                         | 1                                                           |
| AB007896      | 1                                   | 1                             | 1                                     | 1                               | 1                                         | 1                                                           |
| AB007915      | 1                                   | 0                             | 1                                     | 1                               | 1                                         | 1                                                           |
| AB007923      | 1                                   | 0                             | 1                                     | 0                               | 0                                         | 1                                                           |
| AB007925      | 1                                   | 1                             | 1                                     | 1                               | 1                                         | 1                                                           |
| AB007928      | 1                                   | 0                             | 1                                     | 1                               | 1                                         | 0                                                           |
| AB007932      | 1                                   | 1                             | 1                                     | 1                               | 0                                         | 1                                                           |

|          |   |   |   |   |   |   |
|----------|---|---|---|---|---|---|
| AB007941 | 1 | 0 | 1 | 0 | 0 | 0 |
| AB007946 | 1 | 0 | 1 | 1 | 0 | 0 |
| AB007961 | 1 | 0 | 1 | 1 | 0 | 0 |
| AB007962 | 1 | 0 | 1 | 1 | 0 | 0 |
| AB007964 | 1 | 0 | 1 | 1 | 1 | 0 |
| AB007966 | 1 | 0 | 1 | 1 | 0 | 1 |
| AB007969 | 1 | 1 | 1 | 1 | 0 | 1 |
| AB007970 | 0 | 0 | 1 | 0 | 0 | 0 |
| AB007974 | 1 | 1 | 1 | 0 | 1 | 1 |
| AB011090 | 1 | 1 | 1 | 1 | 0 | 1 |
| AB011094 | 1 | 0 | 1 | 1 | 0 | 0 |
| AB011099 | 1 | 0 | 0 | 0 | 0 | 0 |
| AB011114 | 1 | 0 | 1 | 0 | 0 | 0 |
| AB011115 | 1 | 1 | 1 | 1 | 1 | 1 |
| AB011116 | 1 | 0 | 1 | 1 | 1 | 1 |
| AB011117 | 1 | 0 | 1 | 0 | 0 | 1 |
| AB011118 | 1 | 0 | 1 | 0 | 0 | 0 |
| AB011123 | 1 | 1 | 1 | 1 | 1 | 1 |
| AB011126 | 1 | 0 | 1 | 0 | 1 | 1 |
| AB011128 | 1 | 1 | 1 | 1 | 0 | 1 |
| AB011131 | 1 | 0 | 0 | 0 | 0 | 1 |
| AB011133 | 1 | 1 | 1 | 1 | 0 | 1 |
| AB011136 | 1 | 0 | 1 | 1 | 1 | 1 |
| AB011145 | 1 | 0 | 1 | 1 | 1 | 1 |
| AB011146 | 1 | 1 | 1 | 0 | 0 | 1 |
| AB011168 | 1 | 0 | 1 | 0 | 0 | 1 |
| AB011171 | 1 | 1 | 1 | 1 | 0 | 1 |
| AB011174 | 1 | 1 | 1 | 1 | 0 | 1 |
| AB011178 | 1 | 1 | 1 | 1 | 0 | 1 |
| AB011539 | 1 | 0 | 1 | 0 | 0 | 0 |
| AB011540 | 1 | 0 | 1 | 0 | 0 | 0 |
| AB011542 | 1 | 1 | 1 | 1 | 1 | 1 |
| AB014511 | 1 | 1 | 1 | 1 | 1 | 1 |
| AB014513 | 0 | 0 | 1 | 0 | 0 | 0 |
| AB014514 | 1 | 0 | 1 | 1 | 0 | 0 |
| AB014527 | 1 | 0 | 1 | 1 | 1 | 1 |
| AB014538 | 1 | 1 | 1 | 1 | 1 | 0 |
| AB014550 | 1 | 1 | 1 | 1 | 1 | 1 |
| AB014555 | 1 | 1 | 1 | 1 | 1 | 1 |
| AB014557 | 1 | 1 | 1 | 1 | 0 | 1 |
| AB014567 | 1 | 1 | 1 | 1 | 0 | 1 |
| AB014574 | 1 | 1 | 1 | 1 | 1 | 1 |
| AB014578 | 1 | 0 | 1 | 1 | 0 | 1 |
| AB014594 | 1 | 0 | 1 | 1 | 0 | 0 |
| AB014600 | 1 | 0 | 1 | 0 | 0 | 1 |
| AB014608 | 1 | 1 | 1 | 1 | 0 | 0 |
| AB015330 | 1 | 1 | 1 | 1 | 1 | 1 |
| AB015616 | 1 | 0 | 1 | 0 | 0 | 0 |
| AB018268 | 1 | 1 | 1 | 1 | 1 | 1 |
| AB018270 | 1 | 0 | 1 | 0 | 0 | 0 |
| AB018272 | 1 | 0 | 1 | 0 | 0 | 1 |
| AB018289 | 1 | 0 | 1 | 1 | 1 | 1 |

|          |   |   |   |   |   |   |
|----------|---|---|---|---|---|---|
| AB018297 | 1 | 1 | 1 | 0 | 0 | 1 |
| AB018310 | 1 | 1 | 1 | 1 | 0 | 1 |
| AB018317 | 1 | 0 | 1 | 0 | 0 | 0 |
| AB018322 | 1 | 1 | 1 | 1 | 0 | 1 |
| AB018324 | 1 | 0 | 1 | 0 | 0 | 0 |
| AB018332 | 1 | 0 | 1 | 0 | 0 | 1 |
| AB018345 | 1 | 0 | 1 | 1 | 0 | 1 |
| AB018353 | 1 | 1 | 1 | 1 | 1 | 1 |
| AB019567 | 1 | 0 | 1 | 1 | 1 | 1 |
| AB019569 | 1 | 1 | 1 | 1 | 0 | 0 |
| AB020626 | 1 | 0 | 1 | 1 | 1 | 0 |
| AB020633 | 1 | 1 | 1 | 1 | 1 | 1 |
| AB020637 | 1 | 1 | 1 | 1 | 1 | 0 |
| AB020643 | 1 | 1 | 1 | 1 | 0 | 0 |
| AB020648 | 1 | 0 | 1 | 1 | 1 | 1 |
| AB020649 | 1 | 1 | 1 | 1 | 1 | 1 |
| AB020672 | 1 | 0 | 1 | 1 | 0 | 0 |
| AB020677 | 1 | 0 | 1 | 0 | 1 | 1 |
| AB020684 | 1 | 0 | 1 | 0 | 0 | 1 |
| AB020689 | 1 | 0 | 1 | 0 | 1 | 1 |
| AB020691 | 1 | 0 | 1 | 1 | 0 | 0 |
| AB020698 | 1 | 0 | 1 | 0 | 0 | 0 |
| AB020702 | 0 | 0 | 1 | 0 | 0 | 1 |
| AB020725 | 1 | 0 | 1 | 0 | 0 | 0 |
| AB023148 | 1 | 0 | 1 | 0 | 1 | 0 |
| AB023151 | 1 | 0 | 1 | 1 | 1 | 0 |
| AB023152 | 1 | 1 | 1 | 0 | 0 | 1 |
| AB023164 | 1 | 0 | 1 | 1 | 0 | 1 |
| AB023173 | 1 | 0 | 1 | 1 | 0 | 0 |
| AB023177 | 1 | 0 | 1 | 0 | 0 | 1 |
| AB023190 | 1 | 1 | 1 | 1 | 1 | 0 |
| AB023198 | 1 | 0 | 1 | 0 | 0 | 1 |
| AB023201 | 1 | 0 | 1 | 1 | 0 | 0 |
| AB023227 | 1 | 1 | 1 | 1 | 0 | 1 |
| AB023230 | 1 | 1 | 1 | 1 | 0 | 1 |
| AB023233 | 1 | 0 | 1 | 0 | 0 | 1 |
| AB023420 | 1 | 1 | 1 | 1 | 0 | 0 |
| AB026156 | 0 | 0 | 0 | 1 | 0 | 0 |
| AB028947 | 1 | 1 | 1 | 1 | 1 | 1 |
| AB028949 | 1 | 1 | 1 | 1 | 1 | 0 |
| AB028953 | 1 | 0 | 1 | 0 | 1 | 1 |
| AB028955 | 0 | 0 | 0 | 0 | 1 | 0 |
| AB028957 | 1 | 0 | 1 | 0 | 0 | 0 |
| AB028962 | 1 | 0 | 1 | 1 | 0 | 1 |
| AB028968 | 1 | 0 | 1 | 1 | 0 | 1 |
| AB028977 | 1 | 0 | 0 | 0 | 0 | 0 |
| AB028980 | 1 | 0 | 1 | 0 | 0 | 0 |
| AB028986 | 1 | 0 | 1 | 0 | 0 | 0 |
| AB028987 | 1 | 0 | 1 | 0 | 0 | 0 |
| AB028992 | 1 | 0 | 1 | 0 | 0 | 0 |
| AB028999 | 1 | 0 | 1 | 0 | 0 | 1 |
| AB029001 | 1 | 1 | 1 | 0 | 0 | 1 |

|          |   |   |   |   |   |   |
|----------|---|---|---|---|---|---|
| AB029009 | 1 | 0 | 1 | 0 | 1 | 1 |
| AB029010 | 0 | 1 | 1 | 1 | 0 | 1 |
| AB029016 | 1 | 0 | 1 | 0 | 0 | 1 |
| AB029025 | 1 | 1 | 1 | 1 | 0 | 1 |
| AB029029 | 1 | 0 | 1 | 0 | 0 | 0 |
| AB029030 | 1 | 1 | 1 | 0 | 1 | 0 |
| AB029033 | 1 | 1 | 1 | 1 | 0 | 0 |
| AB029041 | 1 | 0 | 1 | 1 | 0 | 1 |
| AB029326 | 1 | 1 | 1 | 1 | 0 | 1 |
| AB032953 | 1 | 0 | 1 | 0 | 0 | 0 |
| AB032956 | 1 | 0 | 0 | 0 | 0 | 1 |
| AB032961 | 1 | 1 | 1 | 0 | 1 | 1 |
| AB032963 | 1 | 1 | 1 | 1 | 0 | 1 |
| AB032970 | 1 | 0 | 1 | 0 | 0 | 0 |
| AB032973 | 1 | 1 | 1 | 1 | 1 | 1 |
| AB032981 | 1 | 0 | 1 | 1 | 1 | 0 |
| AB032983 | 1 | 1 | 1 | 1 | 0 | 1 |
| AB032990 | 1 | 1 | 1 | 1 | 0 | 1 |
| AB032991 | 1 | 1 | 1 | 1 | 0 | 0 |
| AB032996 | 1 | 1 | 1 | 0 | 0 | 1 |
| AB033015 | 1 | 1 | 1 | 1 | 1 | 1 |
| AB033022 | 1 | 1 | 1 | 1 | 0 | 1 |
| AB033025 | 0 | 0 | 1 | 0 | 0 | 0 |
| AB033026 | 0 | 0 | 0 | 0 | 0 | 1 |
| AB033027 | 1 | 0 | 1 | 0 | 1 | 0 |
| AB033035 | 1 | 1 | 1 | 0 | 1 | 1 |
| AB033036 | 1 | 1 | 1 | 1 | 1 | 0 |
| AB033037 | 1 | 0 | 1 | 0 | 0 | 0 |
| AB033040 | 1 | 0 | 1 | 0 | 0 | 1 |
| AB033043 | 0 | 0 | 0 | 0 | 0 | 1 |
| AB033049 | 1 | 1 | 1 | 1 | 1 | 1 |
| AB033054 | 1 | 1 | 1 | 1 | 1 | 1 |
| AB033055 | 1 | 0 | 1 | 1 | 1 | 1 |
| AB033062 | 1 | 0 | 1 | 0 | 0 | 1 |
| AB033063 | 1 | 0 | 1 | 1 | 0 | 0 |
| AB033064 | 1 | 0 | 1 | 0 | 0 | 0 |
| AB033065 | 0 | 0 | 0 | 0 | 0 | 1 |
| AB033066 | 1 | 1 | 1 | 0 | 0 | 0 |
| AB033072 | 1 | 0 | 1 | 0 | 0 | 1 |
| AB033076 | 1 | 0 | 1 | 0 | 1 | 0 |
| AB033087 | 1 | 0 | 1 | 1 | 1 | 1 |
| AB033091 | 1 | 0 | 1 | 1 | 0 | 0 |
| AB033092 | 1 | 1 | 1 | 1 | 0 | 1 |
| AB033100 | 1 | 1 | 1 | 1 | 0 | 0 |
| AB033103 | 1 | 0 | 0 | 0 | 0 | 1 |
| AB033107 | 1 | 0 | 1 | 0 | 0 | 0 |
| AB033108 | 1 | 0 | 1 | 1 | 0 | 0 |
| AB033112 | 1 | 1 | 1 | 1 | 1 | 1 |
| AB037721 | 1 | 1 | 1 | 1 | 1 | 1 |
| AB037722 | 1 | 1 | 1 | 1 | 1 | 1 |
| AB037732 | 1 | 0 | 1 | 0 | 1 | 0 |
| AB037734 | 1 | 1 | 1 | 1 | 0 | 0 |

|          |   |   |   |   |   |   |
|----------|---|---|---|---|---|---|
| AB037748 | 1 | 1 | 1 | 1 | 0 | 0 |
| AB037749 | 1 | 1 | 1 | 1 | 1 | 0 |
| AB037753 | 1 | 0 | 1 | 0 | 0 | 1 |
| AB037758 | 1 | 0 | 1 | 0 | 0 | 0 |
| AB037761 | 1 | 0 | 1 | 0 | 1 | 1 |
| AB037766 | 1 | 1 | 1 | 0 | 0 | 1 |
| AB037770 | 1 | 0 | 1 | 1 | 1 | 1 |
| AB037778 | 1 | 1 | 1 | 1 | 0 | 1 |
| AB037782 | 1 | 0 | 1 | 0 | 1 | 0 |
| AB037791 | 1 | 1 | 1 | 1 | 1 | 1 |
| AB037795 | 1 | 0 | 1 | 1 | 1 | 1 |
| AB037798 | 1 | 0 | 1 | 0 | 0 | 1 |
| AB037805 | 1 | 0 | 1 | 1 | 0 | 1 |
| AB037808 | 1 | 0 | 1 | 0 | 0 | 0 |
| AB037809 | 1 | 1 | 1 | 1 | 0 | 1 |
| AB037810 | 1 | 1 | 1 | 1 | 0 | 1 |
| AB037812 | 0 | 0 | 1 | 0 | 0 | 1 |
| AB037814 | 1 | 1 | 1 | 0 | 1 | 1 |
| AB037815 | 1 | 0 | 1 | 0 | 0 | 0 |
| AB037823 | 1 | 0 | 1 | 0 | 1 | 1 |
| AB037830 | 1 | 0 | 0 | 0 | 0 | 1 |
| AB037844 | 1 | 0 | 1 | 1 | 1 | 0 |
| AB037850 | 1 | 1 | 1 | 1 | 0 | 1 |
| AB037851 | 1 | 0 | 1 | 0 | 1 | 0 |
| AB037853 | 1 | 1 | 1 | 1 | 1 | 0 |
| AB037857 | 1 | 1 | 1 | 1 | 0 | 1 |
| AB037858 | 1 | 1 | 1 | 1 | 0 | 0 |
| AB037861 | 1 | 0 | 1 | 1 | 0 | 1 |
| AB037863 | 1 | 1 | 1 | 1 | 0 | 0 |
| AB038318 | 1 | 0 | 1 | 0 | 0 | 1 |
| AB038783 | 1 | 0 | 0 | 0 | 0 | 1 |
| AB040883 | 1 | 1 | 1 | 1 | 0 | 0 |
| AB040896 | 1 | 0 | 1 | 1 | 1 | 1 |
| AB040897 | 1 | 0 | 1 | 0 | 0 | 0 |
| AB040898 | 1 | 0 | 1 | 0 | 1 | 1 |
| AB040900 | 1 | 0 | 0 | 0 | 0 | 1 |
| AB040918 | 1 | 0 | 1 | 1 | 0 | 1 |
| AB040926 | 1 | 1 | 1 | 1 | 0 | 1 |
| AB040937 | 1 | 0 | 1 | 0 | 0 | 1 |
| AB040938 | 1 | 1 | 1 | 1 | 1 | 1 |
| AB040944 | 1 | 1 | 1 | 1 | 1 | 0 |
| AB040954 | 1 | 0 | 1 | 0 | 0 | 1 |
| AB040955 | 1 | 1 | 1 | 1 | 1 | 1 |
| AB040959 | 1 | 1 | 1 | 1 | 1 | 1 |
| AB040968 | 1 | 0 | 1 | 1 | 0 | 0 |
| AB041269 | 1 | 0 | 1 | 0 | 1 | 1 |
| AB046765 | 1 | 1 | 1 | 1 | 1 | 1 |
| AB046766 | 1 | 0 | 1 | 1 | 1 | 1 |
| AB046769 | 1 | 0 | 1 | 0 | 0 | 0 |
| AB046770 | 1 | 0 | 1 | 0 | 0 | 1 |
| AB046784 | 1 | 0 | 1 | 0 | 0 | 0 |
| AB046791 | 1 | 0 | 1 | 0 | 1 | 1 |

|          |   |   |   |   |   |   |
|----------|---|---|---|---|---|---|
| AB046797 | 1 | 0 | 1 | 1 | 1 | 1 |
| AB046800 | 1 | 1 | 1 | 1 | 0 | 1 |
| AB046806 | 1 | 0 | 1 | 1 | 0 | 0 |
| AB046820 | 1 | 1 | 1 | 1 | 0 | 0 |
| AB046829 | 1 | 0 | 1 | 1 | 0 | 0 |
| AB046843 | 1 | 1 | 1 | 1 | 0 | 1 |
| AB046859 | 1 | 0 | 1 | 0 | 0 | 1 |
| AB046863 | 1 | 0 | 1 | 1 | 1 | 0 |
| AB050195 | 1 | 0 | 1 | 1 | 0 | 0 |
| AB051439 | 1 | 1 | 1 | 1 | 0 | 0 |
| AB051458 | 1 | 0 | 1 | 1 | 1 | 1 |
| AB051463 | 1 | 1 | 1 | 1 | 0 | 0 |
| AB051464 | 1 | 0 | 1 | 1 | 1 | 1 |
| AB051466 | 1 | 1 | 1 | 1 | 0 | 0 |
| AB051470 | 1 | 1 | 1 | 1 | 0 | 1 |
| AB051471 | 0 | 0 | 1 | 1 | 0 | 0 |
| AB051484 | 1 | 1 | 1 | 1 | 0 | 0 |
| AB051487 | 1 | 1 | 1 | 1 | 0 | 1 |
| AB051492 | 1 | 1 | 1 | 1 | 1 | 1 |
| AB051511 | 1 | 0 | 1 | 1 | 1 | 1 |
| AB051513 | 1 | 1 | 1 | 1 | 0 | 1 |
| AB051514 | 1 | 0 | 1 | 1 | 1 | 1 |
| AB051515 | 1 | 1 | 1 | 1 | 0 | 1 |
| AB051516 | 1 | 1 | 1 | 1 | 0 | 0 |
| AB051517 | 1 | 1 | 1 | 1 | 0 | 1 |
| AB051548 | 1 | 0 | 1 | 0 | 1 | 1 |
| AB051558 | 1 | 0 | 1 | 1 | 0 | 0 |
| AB053318 | 1 | 1 | 1 | 1 | 0 | 0 |
| AB058692 | 1 | 0 | 1 | 1 | 1 | 1 |
| AB058697 | 1 | 0 | 1 | 0 | 0 | 1 |
| AB058698 | 1 | 0 | 1 | 1 | 0 | 0 |
| AB058716 | 1 | 1 | 1 | 1 | 0 | 1 |
| AB058729 | 1 | 0 | 1 | 1 | 1 | 1 |
| AB058734 | 1 | 1 | 1 | 1 | 1 | 0 |
| AB058735 | 0 | 0 | 0 | 0 | 0 | 1 |
| AB058736 | 1 | 0 | 1 | 1 | 0 | 1 |
| AB058744 | 1 | 1 | 1 | 1 | 1 | 1 |
| AB058759 | 1 | 0 | 1 | 0 | 1 | 0 |
| AB058765 | 1 | 1 | 1 | 1 | 0 | 1 |
| AB058769 | 0 | 0 | 0 | 0 | 0 | 1 |
| AB067470 | 1 | 1 | 1 | 1 | 0 | 0 |
| AB067483 | 1 | 1 | 1 | 1 | 0 | 1 |
| AB067489 | 1 | 1 | 1 | 1 | 1 | 1 |
| AB067491 | 1 | 0 | 1 | 1 | 0 | 0 |
| AB067498 | 1 | 1 | 1 | 1 | 0 | 1 |
| AB067499 | 1 | 1 | 1 | 1 | 0 | 1 |
| AB067504 | 1 | 1 | 1 | 1 | 0 | 0 |
| AB067508 | 1 | 1 | 1 | 1 | 1 | 1 |
| AB067512 | 1 | 0 | 1 | 0 | 0 | 0 |
| AB075821 | 1 | 0 | 1 | 1 | 0 | 0 |
| AB075824 | 1 | 0 | 0 | 0 | 0 | 0 |
| AB075832 | 1 | 1 | 1 | 1 | 1 | 1 |

|          |   |   |   |   |   |   |
|----------|---|---|---|---|---|---|
| AB075837 | 1 | 1 | 1 | 1 | 0 | 0 |
| AB075842 | 1 | 0 | 1 | 0 | 0 | 0 |
| AB075851 | 1 | 1 | 1 | 1 | 0 | 1 |
| AB075855 | 1 | 0 | 1 | 0 | 1 | 1 |
| AB075856 | 0 | 0 | 0 | 0 | 0 | 1 |
| AB075859 | 1 | 0 | 1 | 1 | 1 | 1 |
| AB076400 | 1 | 0 | 0 | 0 | 0 | 1 |
| AF001540 | 1 | 0 | 1 | 0 | 0 | 0 |
| AF001792 | 1 | 0 | 1 | 0 | 0 | 0 |
| AF005081 | 1 | 0 | 1 | 0 | 1 | 1 |
| AF005487 | 1 | 0 | 1 | 0 | 1 | 0 |
| AF007147 | 1 | 1 | 1 | 1 | 0 | 1 |
| AF007149 | 0 | 0 | 1 | 0 | 0 | 0 |
| AF007153 | 0 | 0 | 0 | 0 | 0 | 1 |
| AF009263 | 1 | 1 | 0 | 0 | 0 | 1 |
| AF009267 | 1 | 0 | 1 | 0 | 0 | 1 |
| AF009268 | 1 | 0 | 1 | 0 | 0 | 0 |
| AF009314 | 1 | 0 | 1 | 0 | 0 | 0 |
| AF015140 | 1 | 0 | 1 | 0 | 0 | 0 |
| AF016693 | 0 | 1 | 0 | 0 | 0 | 0 |
| AF016694 | 0 | 0 | 0 | 0 | 0 | 1 |
| AF019083 | 1 | 1 | 1 | 1 | 1 | 1 |
| AF019617 | 0 | 0 | 0 | 0 | 0 | 1 |
| AF019618 | 1 | 0 | 1 | 1 | 1 | 0 |
| AF020642 | 1 | 1 | 1 | 1 | 0 | 1 |
| AF034803 | 1 | 0 | 1 | 0 | 0 | 1 |
| AF035278 | 1 | 1 | 1 | 1 | 1 | 1 |
| AF035290 | 1 | 0 | 0 | 0 | 0 | 0 |
| AF035307 | 1 | 1 | 1 | 1 | 1 | 1 |
| AF035308 | 1 | 0 | 1 | 0 | 0 | 1 |
| AF035315 | 1 | 0 | 1 | 0 | 1 | 1 |
| AF035317 | 0 | 0 | 0 | 0 | 0 | 1 |
| AF035318 | 1 | 0 | 1 | 0 | 0 | 1 |
| AF038171 | 1 | 1 | 1 | 1 | 1 | 1 |
| AF038183 | 1 | 0 | 1 | 0 | 1 | 1 |
| AF038185 | 1 | 1 | 1 | 1 | 0 | 0 |
| AF038190 | 1 | 0 | 1 | 0 | 1 | 0 |
| AF038193 | 1 | 0 | 1 | 0 | 0 | 1 |
| AF038196 | 1 | 0 | 0 | 0 | 0 | 0 |
| AF038199 | 1 | 0 | 1 | 0 | 0 | 1 |
| AF038201 | 0 | 0 | 0 | 0 | 0 | 1 |
| AF038202 | 1 | 1 | 1 | 1 | 1 | 1 |
| AF038535 | 1 | 1 | 1 | 1 | 1 | 1 |
| AF039023 | 1 | 0 | 1 | 0 | 0 | 0 |
| AF039697 | 1 | 1 | 1 | 1 | 1 | 1 |
| AF040965 | 1 | 1 | 1 | 1 | 0 | 1 |
| AF041037 | 1 | 1 | 1 | 1 | 0 | 0 |
| AF045805 | 1 | 0 | 1 | 0 | 0 | 1 |
| AF047262 | 1 | 1 | 1 | 1 | 0 | 1 |
| AF052094 | 1 | 1 | 1 | 0 | 0 | 0 |
| AF052100 | 1 | 0 | 1 | 1 | 1 | 1 |
| AF052101 | 1 | 1 | 1 | 1 | 1 | 1 |



|          |   |   |   |   |   |   |
|----------|---|---|---|---|---|---|
| AF052103 | 1 | 1 | 1 | 1 | 1 | 0 |
| AF052107 | 1 | 1 | 1 | 1 | 1 | 1 |
| AF052108 | 1 | 0 | 0 | 0 | 0 | 0 |
| AF052109 | 1 | 0 | 1 | 0 | 0 | 0 |
| AF052115 | 1 | 0 | 1 | 0 | 1 | 1 |
| AF052117 | 1 | 1 | 1 | 1 | 0 | 1 |
| AF052118 | 1 | 0 | 1 | 0 | 1 | 1 |
| AF052119 | 1 | 0 | 1 | 0 | 0 | 1 |
| AF052120 | 1 | 0 | 1 | 1 | 1 | 0 |
| AF052138 | 1 | 0 | 1 | 0 | 0 | 0 |
| AF052141 | 0 | 0 | 1 | 1 | 0 | 0 |
| AF052145 | 1 | 0 | 1 | 0 | 0 | 0 |
| AF052152 | 0 | 1 | 0 | 1 | 0 | 0 |
| AF052160 | 1 | 0 | 1 | 1 | 1 | 1 |
| AF052174 | 1 | 0 | 1 | 0 | 0 | 1 |
| AF052177 | 1 | 0 | 0 | 1 | 1 | 0 |
| AF052181 | 1 | 1 | 1 | 1 | 1 | 1 |
| AF052780 | 1 | 0 | 1 | 0 | 0 | 0 |
| AF052791 | 0 | 1 | 1 | 1 | 0 | 0 |
| AF052807 | 1 | 0 | 1 | 0 | 0 | 0 |
| AF054589 | 1 | 0 | 1 | 1 | 0 | 1 |
| AF054995 | 1 | 0 | 0 | 0 | 0 | 0 |
| AF055018 | 1 | 0 | 1 | 1 | 1 | 0 |
| AF055023 | 1 | 0 | 1 | 1 | 0 | 1 |
| AF055027 | 1 | 0 | 1 | 0 | 0 | 0 |
| AF055029 | 1 | 1 | 1 | 1 | 0 | 0 |
| AF055030 | 1 | 0 | 1 | 0 | 0 | 1 |
| AF056425 | 1 | 0 | 1 | 0 | 0 | 0 |
| AF056455 | 1 | 0 | 1 | 0 | 0 | 0 |
| AF059531 | 1 | 0 | 1 | 1 | 1 | 1 |
| AF063696 | 1 | 0 | 1 | 0 | 0 | 1 |
| AF064498 | 1 | 0 | 1 | 0 | 0 | 1 |
| AF064843 | 1 | 0 | 1 | 0 | 1 | 1 |
| AF067420 | 1 | 1 | 1 | 0 | 1 | 1 |
| AF069135 | 1 | 0 | 1 | 1 | 0 | 0 |
| AF069136 | 1 | 0 | 1 | 0 | 0 | 0 |
| AF070541 | 1 | 0 | 1 | 0 | 0 | 0 |
| AF070554 | 1 | 1 | 1 | 1 | 0 | 0 |
| AF070575 | 1 | 1 | 1 | 1 | 0 | 0 |
| AF070579 | 1 | 1 | 1 | 1 | 0 | 0 |
| AF070580 | 1 | 0 | 1 | 0 | 0 | 1 |
| AF070581 | 1 | 0 | 0 | 0 | 0 | 1 |
| AF070587 | 1 | 1 | 1 | 1 | 1 | 1 |
| AF070595 | 1 | 0 | 1 | 1 | 1 | 0 |
| AF070602 | 1 | 0 | 0 | 0 | 0 | 1 |
| AF070606 | 1 | 1 | 1 | 1 | 0 | 1 |
| AF070613 | 1 | 1 | 1 | 0 | 0 | 0 |
| AF070618 | 1 | 0 | 1 | 0 | 0 | 0 |
| AF070621 | 1 | 1 | 1 | 1 | 0 | 1 |
| AF070632 | 1 | 1 | 1 | 1 | 0 | 1 |
| AF074986 | 1 | 0 | 1 | 0 | 0 | 0 |
| AF074987 | 1 | 1 | 1 | 1 | 0 | 1 |

|          |   |   |   |   |   |   |
|----------|---|---|---|---|---|---|
| AF074997 | 1 | 0 | 1 | 1 | 0 | 1 |
| AF074998 | 1 | 0 | 1 | 0 | 1 | 1 |
| AF075002 | 1 | 0 | 1 | 0 | 0 | 1 |
| AF075018 | 1 | 0 | 1 | 0 | 0 | 1 |
| AF075027 | 1 | 0 | 1 | 0 | 0 | 1 |
| AF075029 | 1 | 0 | 1 | 0 | 0 | 1 |
| AF075031 | 1 | 1 | 1 | 1 | 1 | 1 |
| AF075057 | 1 | 0 | 1 | 0 | 0 | 1 |
| AF075063 | 1 | 0 | 1 | 0 | 0 | 1 |
| AF075079 | 1 | 0 | 0 | 0 | 0 | 1 |
| AF075087 | 1 | 0 | 1 | 0 | 1 | 0 |
| AF075099 | 1 | 1 | 1 | 1 | 0 | 1 |
| AF075103 | 1 | 0 | 0 | 0 | 0 | 1 |
| AF078844 | 1 | 0 | 1 | 0 | 0 | 1 |
| AF080158 | 1 | 0 | 1 | 1 | 1 | 0 |
| AF085351 | 1 | 0 | 1 | 0 | 1 | 1 |
| AF085833 | 1 | 0 | 1 | 1 | 1 | 0 |
| AF085842 | 1 | 1 | 1 | 1 | 0 | 0 |
| AF085861 | 1 | 0 | 1 | 0 | 1 | 1 |
| AF085867 | 1 | 0 | 1 | 1 | 0 | 0 |
| AF085868 | 1 | 1 | 1 | 1 | 0 | 1 |
| AF085871 | 0 | 0 | 0 | 1 | 0 | 0 |
| AF085874 | 1 | 0 | 1 | 0 | 0 | 0 |
| AF085900 | 1 | 0 | 1 | 1 | 1 | 1 |
| AF085913 | 1 | 0 | 1 | 0 | 1 | 1 |
| AF085944 | 1 | 0 | 1 | 1 | 1 | 1 |
| AF085951 | 1 | 1 | 1 | 1 | 0 | 1 |
| AF085960 | 1 | 0 | 1 | 0 | 0 | 1 |
| AF085972 | 0 | 0 | 0 | 0 | 0 | 1 |
| AF085983 | 1 | 0 | 1 | 0 | 0 | 1 |
| AF085998 | 1 | 0 | 1 | 0 | 1 | 1 |
| AF086004 | 1 | 1 | 1 | 1 | 0 | 0 |
| AF086007 | 1 | 1 | 1 | 1 | 1 | 1 |
| AF086014 | 1 | 1 | 1 | 1 | 0 | 1 |
| AF086016 | 1 | 1 | 1 | 1 | 1 | 0 |
| AF086018 | 1 | 0 | 0 | 0 | 0 | 0 |
| AF086019 | 1 | 0 | 1 | 0 | 0 | 0 |
| AF086021 | 1 | 1 | 1 | 0 | 0 | 1 |
| AF086028 | 0 | 0 | 0 | 0 | 1 | 0 |
| AF086030 | 1 | 1 | 1 | 1 | 0 | 1 |
| AF086032 | 1 | 0 | 1 | 1 | 0 | 1 |
| AF086041 | 1 | 0 | 1 | 0 | 0 | 1 |
| AF086050 | 1 | 0 | 1 | 0 | 0 | 0 |
| AF086052 | 1 | 0 | 1 | 0 | 0 | 0 |
| AF086053 | 1 | 0 | 1 | 0 | 0 | 1 |
| AF086063 | 1 | 1 | 1 | 1 | 0 | 1 |
| AF086064 | 1 | 1 | 1 | 1 | 1 | 1 |
| AF086074 | 1 | 1 | 1 | 1 | 0 | 1 |
| AF086087 | 0 | 0 | 1 | 0 | 0 | 0 |
| AF086094 | 1 | 1 | 1 | 0 | 0 | 1 |
| AF086119 | 1 | 1 | 1 | 1 | 0 | 1 |
| AF086130 | 1 | 1 | 1 | 1 | 0 | 1 |

|          |   |   |   |   |   |   |
|----------|---|---|---|---|---|---|
| AF086149 | 1 | 1 | 1 | 1 | 0 | 0 |
| AF086156 | 1 | 0 | 0 | 0 | 0 | 0 |
| AF086158 | 1 | 0 | 1 | 0 | 0 | 0 |
| AF086164 | 1 | 1 | 1 | 1 | 0 | 0 |
| AF086189 | 1 | 0 | 1 | 0 | 0 | 0 |
| AF086207 | 1 | 1 | 1 | 1 | 0 | 0 |
| AF086216 | 0 | 1 | 0 | 0 | 0 | 0 |
| AF086231 | 1 | 1 | 1 | 1 | 0 | 0 |
| AF086252 | 1 | 1 | 1 | 1 | 0 | 0 |
| AF086257 | 1 | 1 | 1 | 1 | 1 | 1 |
| AF086261 | 1 | 0 | 1 | 0 | 0 | 0 |
| AF086272 | 1 | 1 | 1 | 1 | 0 | 0 |
| AF086309 | 1 | 0 | 1 | 0 | 0 | 1 |
| AF086314 | 1 | 0 | 1 | 0 | 0 | 0 |
| AF086341 | 1 | 0 | 1 | 0 | 0 | 1 |
| AF086342 | 1 | 0 | 1 | 1 | 1 | 1 |
| AF086374 | 1 | 0 | 1 | 1 | 0 | 0 |
| AF086381 | 1 | 0 | 1 | 0 | 0 | 0 |
| AF086383 | 1 | 0 | 1 | 0 | 0 | 0 |
| AF086402 | 1 | 0 | 1 | 1 | 0 | 0 |
| AF086431 | 1 | 1 | 1 | 1 | 0 | 1 |
| AF086436 | 1 | 0 | 0 | 1 | 0 | 1 |
| AF086441 | 1 | 0 | 1 | 0 | 1 | 1 |
| AF086461 | 1 | 1 | 0 | 0 | 0 | 1 |
| AF086463 | 1 | 0 | 0 | 0 | 0 | 0 |
| AF086471 | 1 | 1 | 1 | 1 | 0 | 1 |
| AF086477 | 0 | 0 | 0 | 0 | 0 | 1 |
| AF086503 | 1 | 0 | 1 | 1 | 1 | 1 |
| AF086516 | 1 | 0 | 1 | 0 | 0 | 0 |
| AF086534 | 1 | 0 | 1 | 0 | 1 | 1 |
| AF086538 | 0 | 0 | 0 | 0 | 0 | 1 |
| AF086543 | 1 | 0 | 1 | 0 | 0 | 0 |
| AF086546 | 1 | 0 | 1 | 0 | 1 | 0 |
| AF086561 | 1 | 0 | 1 | 0 | 1 | 1 |
| AF087965 | 1 | 1 | 0 | 0 | 0 | 1 |
| AF087980 | 1 | 0 | 1 | 0 | 1 | 0 |
| AF087995 | 1 | 0 | 1 | 0 | 0 | 0 |
| AF087999 | 1 | 0 | 1 | 1 | 1 | 1 |
| AF088007 | 1 | 1 | 1 | 1 | 1 | 0 |
| AF088015 | 1 | 1 | 1 | 1 | 0 | 0 |
| AF088016 | 1 | 0 | 1 | 0 | 0 | 0 |
| AF088019 | 1 | 0 | 1 | 0 | 0 | 1 |
| AF088020 | 1 | 0 | 1 | 0 | 0 | 0 |
| AF088024 | 1 | 0 | 1 | 0 | 0 | 1 |
| AF088040 | 1 | 1 | 1 | 0 | 1 | 1 |
| AF088045 | 1 | 0 | 1 | 0 | 0 | 1 |
| AF088051 | 1 | 0 | 1 | 0 | 0 | 0 |
| AF088056 | 1 | 0 | 1 | 0 | 0 | 0 |
| AF088061 | 1 | 0 | 1 | 0 | 0 | 1 |
| AF088326 | 1 | 0 | 1 | 0 | 0 | 0 |
| AF088500 | 1 | 0 | 1 | 0 | 0 | 0 |
| AF088541 | 1 | 0 | 1 | 1 | 0 | 0 |

|          |   |   |   |   |   |   |
|----------|---|---|---|---|---|---|
| AF088570 | 1 | 0 | 1 | 1 | 0 | 0 |
| AF088735 | 1 | 0 | 1 | 1 | 0 | 0 |
| AF090896 | 1 | 0 | 0 | 0 | 0 | 1 |
| AF090900 | 1 | 0 | 1 | 1 | 0 | 1 |
| AF090913 | 1 | 0 | 1 | 0 | 0 | 0 |
| AF090916 | 1 | 0 | 1 | 1 | 0 | 1 |
| AF090932 | 1 | 1 | 1 | 1 | 1 | 1 |
| AF091089 | 1 | 0 | 1 | 0 | 0 | 0 |
| AF091236 | 1 | 0 | 1 | 0 | 0 | 1 |
| AF098485 | 1 | 1 | 1 | 1 | 1 | 0 |
| AF103095 | 1 | 1 | 1 | 0 | 0 | 1 |
| AF103098 | 1 | 0 | 1 | 0 | 0 | 1 |
| AF103375 | 1 | 0 | 1 | 0 | 0 | 1 |
| AF103458 | 1 | 0 | 1 | 0 | 0 | 1 |
| AF103589 | 1 | 0 | 1 | 0 | 0 | 1 |
| AF103669 | 1 | 0 | 1 | 0 | 0 | 1 |
| AF105378 | 1 | 0 | 0 | 0 | 0 | 0 |
| AF107455 | 1 | 0 | 1 | 1 | 0 | 0 |
| AF108138 | 1 | 1 | 1 | 1 | 0 | 1 |
| AF108756 | 1 | 0 | 1 | 0 | 0 | 1 |
| AF111801 | 1 | 1 | 1 | 1 | 0 | 1 |
| AF111845 | 1 | 0 | 1 | 0 | 0 | 0 |
| AF113018 | 1 | 0 | 1 | 0 | 0 | 1 |
| AF116628 | 1 | 1 | 1 | 1 | 0 | 1 |
| AF116637 | 1 | 0 | 1 | 0 | 0 | 1 |
| AF116653 | 1 | 0 | 1 | 0 | 1 | 1 |
| AF116682 | 1 | 1 | 1 | 1 | 0 | 1 |
| AF116716 | 1 | 0 | 1 | 0 | 0 | 1 |
| AF118274 | 1 | 0 | 1 | 0 | 1 | 1 |
| AF119045 | 0 | 0 | 0 | 0 | 0 | 1 |
| AF119839 | 1 | 0 | 0 | 0 | 0 | 1 |
| AF119843 | 1 | 1 | 1 | 1 | 1 | 1 |
| AF119847 | 1 | 0 | 1 | 0 | 1 | 0 |
| AF119865 | 1 | 0 | 1 | 1 | 1 | 1 |
| AF124819 | 1 | 0 | 1 | 0 | 1 | 0 |
| AF130048 | 1 | 1 | 1 | 1 | 0 | 0 |
| AF130051 | 1 | 0 | 1 | 1 | 0 | 0 |
| AF130062 | 1 | 0 | 1 | 0 | 0 | 0 |
| AF130079 | 1 | 0 | 1 | 1 | 0 | 0 |
| AF130094 | 1 | 0 | 1 | 0 | 0 | 0 |
| AF130101 | 1 | 0 | 1 | 0 | 0 | 1 |
| AF130107 | 0 | 0 | 0 | 0 | 0 | 1 |
| AF131748 | 1 | 0 | 1 | 1 | 1 | 1 |
| AF131756 | 0 | 0 | 0 | 0 | 0 | 1 |
| AF131762 | 1 | 1 | 1 | 1 | 0 | 1 |
| AF131763 | 1 | 0 | 1 | 0 | 0 | 1 |
| AF131764 | 1 | 0 | 1 | 1 | 1 | 1 |
| AF131767 | 1 | 0 | 1 | 0 | 0 | 1 |
| AF131772 | 1 | 0 | 1 | 0 | 0 | 1 |
| AF131782 | 1 | 0 | 1 | 0 | 0 | 1 |
| AF131784 | 1 | 1 | 1 | 1 | 1 | 1 |
| AF131795 | 0 | 1 | 0 | 0 | 0 | 0 |

|          |   |   |   |   |   |   |
|----------|---|---|---|---|---|---|
| AF131796 | 1 | 1 | 1 | 0 | 0 | 0 |
| AF131798 | 1 | 0 | 1 | 0 | 1 | 1 |
| AF131799 | 1 | 0 | 1 | 0 | 0 | 0 |
| AF131806 | 1 | 0 | 1 | 0 | 0 | 1 |
| AF131808 | 1 | 1 | 1 | 1 | 0 | 0 |
| AF131811 | 1 | 0 | 1 | 1 | 0 | 0 |
| AF131813 | 0 | 1 | 0 | 0 | 0 | 1 |
| AF131815 | 1 | 0 | 1 | 0 | 0 | 1 |
| AF131817 | 1 | 0 | 0 | 0 | 0 | 0 |
| AF131819 | 1 | 1 | 1 | 0 | 0 | 1 |
| AF131825 | 1 | 0 | 1 | 0 | 0 | 0 |
| AF131830 | 1 | 0 | 1 | 0 | 0 | 0 |
| AF131831 | 1 | 0 | 1 | 1 | 0 | 1 |
| AF131843 | 1 | 0 | 0 | 0 | 0 | 1 |
| AF131846 | 1 | 0 | 1 | 1 | 0 | 1 |
| AF131852 | 1 | 0 | 0 | 0 | 0 | 0 |
| AF131859 | 1 | 0 | 1 | 0 | 0 | 1 |
| AF135164 | 1 | 0 | 1 | 0 | 0 | 1 |
| AF136408 | 1 | 0 | 1 | 0 | 0 | 1 |
| AF142421 | 1 | 0 | 1 | 1 | 1 | 0 |
| AF144056 | 0 | 0 | 0 | 0 | 0 | 1 |
| AF144233 | 1 | 0 | 1 | 1 | 1 | 1 |
| AF147300 | 1 | 1 | 1 | 1 | 0 | 1 |
| AF147313 | 1 | 1 | 1 | 1 | 0 | 1 |
| AF147314 | 1 | 0 | 1 | 0 | 0 | 0 |
| AF147324 | 1 | 0 | 1 | 1 | 0 | 1 |
| AF147333 | 1 | 0 | 1 | 0 | 0 | 1 |
| AF147344 | 1 | 0 | 1 | 0 | 1 | 1 |
| AF147346 | 1 | 0 | 1 | 0 | 1 | 1 |
| AF147347 | 1 | 1 | 1 | 1 | 0 | 1 |
| AF147349 | 1 | 0 | 1 | 0 | 0 | 1 |
| AF147351 | 1 | 1 | 1 | 1 | 0 | 1 |
| AF147358 | 1 | 0 | 1 | 1 | 0 | 0 |
| AF147359 | 1 | 0 | 1 | 0 | 0 | 1 |
| AF147375 | 1 | 0 | 0 | 0 | 0 | 0 |
| AF147392 | 1 | 1 | 1 | 1 | 0 | 0 |
| AF147408 | 1 | 1 | 1 | 1 | 0 | 1 |
| AF147412 | 0 | 0 | 1 | 0 | 0 | 0 |
| AF147440 | 1 | 1 | 1 | 1 | 0 | 0 |
| AF161343 | 1 | 1 | 1 | 1 | 0 | 0 |
| AF161345 | 1 | 0 | 1 | 0 | 0 | 1 |
| AF161372 | 1 | 0 | 1 | 0 | 1 | 1 |
| AF161386 | 1 | 1 | 1 | 1 | 0 | 1 |
| AF161414 | 1 | 0 | 1 | 0 | 0 | 1 |
| AF161441 | 1 | 0 | 1 | 0 | 0 | 0 |
| AF161444 | 1 | 1 | 1 | 1 | 0 | 1 |
| AF169158 | 1 | 0 | 1 | 0 | 0 | 1 |
| AF174600 | 1 | 1 | 1 | 1 | 0 | 1 |
| AF174603 | 1 | 0 | 1 | 0 | 1 | 1 |
| AF177292 | 0 | 0 | 0 | 0 | 0 | 1 |
| AF200341 | 1 | 0 | 1 | 0 | 0 | 0 |
| AF200348 | 1 | 0 | 1 | 0 | 0 | 0 |

|             |   |   |   |   |   |   |
|-------------|---|---|---|---|---|---|
| AF211926    | 1 | 0 | 1 | 0 | 0 | 1 |
| AF211931    | 1 | 0 | 1 | 1 | 1 | 1 |
| AF211968    | 1 | 1 | 1 | 1 | 1 | 1 |
| AF211972    | 0 | 0 | 1 | 0 | 0 | 0 |
| AF211977    | 1 | 1 | 1 | 1 | 0 | 1 |
| AF216077    | 1 | 0 | 1 | 0 | 0 | 0 |
| AF217751    | 0 | 0 | 0 | 0 | 0 | 1 |
| AF218942    | 0 | 1 | 0 | 0 | 0 | 0 |
| AF220234    | 1 | 1 | 1 | 1 | 0 | 1 |
| AF232216    | 1 | 0 | 1 | 0 | 0 | 0 |
| AF241255    | 1 | 0 | 1 | 1 | 1 | 1 |
| AF242771    | 1 | 0 | 1 | 1 | 1 | 1 |
| AF248483    | 1 | 0 | 1 | 0 | 1 | 0 |
| AF252284    | 1 | 1 | 1 | 1 | 1 | 1 |
| AF254576    | 1 | 0 | 1 | 1 | 0 | 0 |
| AF258564    | 1 | 0 | 1 | 0 | 0 | 0 |
| AF263613    | 1 | 1 | 1 | 1 | 1 | 1 |
| AF264622    | 1 | 0 | 1 | 1 | 0 | 1 |
| AF266280    | 1 | 1 | 1 | 1 | 1 | 1 |
| AF272739    | 1 | 0 | 0 | 0 | 0 | 0 |
| AF274932    | 1 | 1 | 1 | 1 | 1 | 1 |
| AF274937    | 1 | 0 | 1 | 1 | 0 | 1 |
| AF275684    | 1 | 0 | 1 | 0 | 0 | 1 |
| AF277187    | 1 | 1 | 1 | 1 | 0 | 1 |
| AF277572    | 1 | 0 | 1 | 1 | 0 | 0 |
| AF277624    | 1 | 0 | 1 | 0 | 0 | 0 |
| AF283771    | 0 | 0 | 1 | 0 | 0 | 0 |
| AF283776    | 1 | 0 | 1 | 0 | 0 | 0 |
| AF289562    | 1 | 1 | 1 | 1 | 0 | 0 |
| AF289595    | 1 | 1 | 1 | 1 | 0 | 1 |
| AF293026    | 1 | 1 | 1 | 1 | 1 | 1 |
| AF301222    | 1 | 0 | 1 | 0 | 0 | 1 |
| AF306939    | 1 | 1 | 1 | 1 | 0 | 1 |
| AF308287    | 1 | 1 | 1 | 1 | 1 | 1 |
| AF318328    | 1 | 1 | 1 | 1 | 0 | 1 |
| AF318360    | 1 | 1 | 1 | 1 | 0 | 0 |
| AF318380    | 1 | 0 | 1 | 0 | 0 | 1 |
| AF318382    | 1 | 0 | 0 | 0 | 0 | 0 |
| AF333388    | 1 | 0 | 1 | 0 | 0 | 0 |
| AF338919    | 1 | 0 | 1 | 0 | 0 | 1 |
| AF361356    | 0 | 0 | 1 | 0 | 0 | 0 |
| AF363068    | 1 | 0 | 1 | 0 | 0 | 0 |
| AF387612    | 1 | 1 | 1 | 0 | 0 | 1 |
| AF394198    | 1 | 0 | 1 | 0 | 1 | 1 |
| AF397397    | 1 | 1 | 1 | 1 | 0 | 0 |
| AF403033    | 0 | 0 | 0 | 0 | 0 | 1 |
| AF432917    | 1 | 0 | 0 | 0 | 0 | 0 |
| AF486622    | 1 | 0 | 1 | 0 | 1 | 0 |
| AF486844    | 1 | 0 | 1 | 0 | 0 | 0 |
| AI076473_RC | 1 | 1 | 1 | 1 | 0 | 0 |
| AI127067_RC | 1 | 0 | 1 | 0 | 0 | 0 |
| AI339981_RC | 1 | 1 | 1 | 1 | 1 | 1 |

|             |   |   |   |   |   |   |
|-------------|---|---|---|---|---|---|
| AI347216_RC | 1 | 0 | 1 | 0 | 0 | 1 |
| AI373835_RC | 1 | 0 | 1 | 0 | 0 | 0 |
| AI393246_RC | 1 | 0 | 1 | 0 | 1 | 0 |
| AI400473_RC | 1 | 0 | 1 | 0 | 1 | 1 |
| AI400862_RC | 1 | 0 | 1 | 0 | 0 | 1 |
| AI401061_RC | 1 | 1 | 1 | 1 | 1 | 1 |
| AI434777_RC | 1 | 1 | 1 | 1 | 1 | 0 |
| AI478349_RC | 1 | 1 | 1 | 1 | 1 | 1 |
| AI559539_RC | 1 | 1 | 1 | 0 | 0 | 0 |
| AI681039_RC | 1 | 1 | 1 | 1 | 0 | 0 |
| AI685170_RC | 1 | 0 | 1 | 0 | 0 | 1 |
| AI928427_RC | 1 | 1 | 1 | 1 | 1 | 1 |
| AJ002535    | 1 | 1 | 1 | 1 | 0 | 1 |
| AJ002572    | 1 | 0 | 1 | 0 | 1 | 0 |
| AJ007015    | 1 | 0 | 1 | 0 | 0 | 0 |
| AJ008200    | 1 | 1 | 1 | 1 | 0 | 0 |
| AJ010233    | 1 | 0 | 1 | 1 | 0 | 1 |
| AJ132820    | 0 | 0 | 0 | 0 | 0 | 1 |
| AJ224083    | 1 | 0 | 1 | 0 | 0 | 0 |
| AJ225092    | 1 | 0 | 1 | 0 | 0 | 1 |
| AJ227855    | 1 | 0 | 1 | 0 | 0 | 0 |
| AJ227863    | 1 | 0 | 1 | 0 | 0 | 1 |
| AJ227884    | 0 | 0 | 0 | 1 | 0 | 0 |
| AJ227886    | 1 | 0 | 1 | 0 | 1 | 1 |
| AJ227898    | 1 | 1 | 1 | 1 | 1 | 1 |
| AJ227905    | 0 | 0 | 0 | 1 | 0 | 1 |
| AJ227908    | 1 | 0 | 1 | 0 | 0 | 0 |
| AJ243936    | 0 | 0 | 0 | 0 | 0 | 1 |
| AJ251708    | 1 | 0 | 1 | 0 | 1 | 1 |
| AJ272175    | 1 | 0 | 1 | 0 | 0 | 0 |
| AJ276240    | 0 | 1 | 0 | 0 | 0 | 1 |
| AJ276510    | 1 | 1 | 1 | 1 | 0 | 1 |
| AJ296358    | 1 | 1 | 1 | 1 | 0 | 1 |
| AJ297964    | 1 | 1 | 1 | 0 | 0 | 0 |
| AJ298039    | 1 | 0 | 1 | 0 | 0 | 1 |
| AJ298043    | 1 | 0 | 1 | 0 | 1 | 1 |
| AJ302536    | 1 | 0 | 0 | 0 | 0 | 0 |
| AJ303366    | 1 | 0 | 0 | 0 | 0 | 0 |
| AJ312323    | 1 | 1 | 1 | 1 | 0 | 1 |
| AJ318895    | 1 | 0 | 1 | 0 | 0 | 0 |
| AJ399839    | 1 | 0 | 1 | 0 | 0 | 1 |
| AJ406938    | 1 | 0 | 1 | 1 | 0 | 1 |
| AJ406940    | 1 | 0 | 1 | 0 | 0 | 0 |
| AJ406941    | 0 | 0 | 0 | 0 | 0 | 1 |
| AJ406945    | 1 | 0 | 1 | 1 | 1 | 1 |
| AJ406949    | 0 | 0 | 0 | 0 | 0 | 1 |
| AJ410921    | 1 | 0 | 1 | 0 | 1 | 1 |
| AJ420416    | 1 | 1 | 1 | 1 | 0 | 1 |
| AJ420467    | 0 | 0 | 1 | 0 | 0 | 0 |
| AJ420555    | 1 | 1 | 1 | 1 | 1 | 1 |
| AJ420583    | 1 | 1 | 1 | 1 | 1 | 1 |
| AJ420585    | 1 | 1 | 1 | 1 | 1 | 1 |

|          |   |   |   |   |   |   |
|----------|---|---|---|---|---|---|
| AJ457796 | 1 | 0 | 1 | 0 | 0 | 0 |
| AK000001 | 1 | 0 | 1 | 0 | 0 | 1 |
| AK000009 | 1 | 0 | 1 | 1 | 1 | 1 |
| AK000038 | 1 | 0 | 1 | 0 | 0 | 1 |
| AK000085 | 1 | 0 | 1 | 1 | 0 | 0 |
| AK000141 | 1 | 1 | 1 | 0 | 0 | 0 |
| AK000144 | 1 | 1 | 1 | 1 | 1 | 0 |
| AK000160 | 1 | 0 | 1 | 0 | 0 | 0 |
| AK000175 | 1 | 0 | 1 | 1 | 0 | 1 |
| AK000189 | 1 | 0 | 1 | 1 | 1 | 1 |
| AK000205 | 1 | 1 | 0 | 0 | 0 | 1 |
| AK000216 | 1 | 0 | 1 | 1 | 1 | 1 |
| AK000220 | 1 | 0 | 1 | 1 | 0 | 1 |
| AK000229 | 1 | 1 | 1 | 1 | 1 | 1 |
| AK000297 | 1 | 0 | 1 | 0 | 0 | 1 |
| AK000311 | 1 | 0 | 1 | 1 | 0 | 1 |
| AK000357 | 1 | 1 | 1 | 1 | 0 | 1 |
| AK000414 | 1 | 0 | 1 | 0 | 0 | 0 |
| AK000435 | 1 | 1 | 1 | 1 | 1 | 1 |
| AK000493 | 1 | 0 | 0 | 0 | 0 | 1 |
| AK000535 | 1 | 0 | 1 | 0 | 1 | 1 |
| AK000539 | 1 | 1 | 1 | 1 | 0 | 1 |
| AK000554 | 1 | 1 | 1 | 1 | 0 | 0 |
| AK000660 | 1 | 1 | 1 | 1 | 0 | 1 |
| AK000671 | 0 | 0 | 0 | 0 | 0 | 1 |
| AK000687 | 1 | 0 | 1 | 0 | 0 | 0 |
| AK000703 | 1 | 0 | 1 | 1 | 1 | 0 |
| AK000757 | 1 | 1 | 1 | 1 | 1 | 1 |
| AK000772 | 1 | 1 | 0 | 1 | 0 | 1 |
| AK000776 | 1 | 1 | 0 | 0 | 0 | 0 |
| AK000778 | 1 | 0 | 0 | 0 | 0 | 0 |
| AK000787 | 1 | 0 | 1 | 1 | 0 | 0 |
| AK000792 | 1 | 0 | 1 | 0 | 0 | 1 |
| AK000794 | 1 | 1 | 1 | 1 | 0 | 1 |
| AK000795 | 1 | 1 | 0 | 0 | 0 | 0 |
| AK000799 | 1 | 0 | 1 | 1 | 0 | 1 |
| AK000802 | 0 | 0 | 1 | 0 | 0 | 0 |
| AK000811 | 1 | 0 | 1 | 0 | 0 | 0 |
| AK000839 | 1 | 0 | 1 | 0 | 1 | 1 |
| AK000877 | 1 | 0 | 1 | 0 | 0 | 0 |
| AK000878 | 1 | 0 | 1 | 1 | 0 | 1 |
| AK000903 | 1 | 1 | 1 | 1 | 1 | 1 |
| AK000908 | 1 | 0 | 1 | 1 | 1 | 1 |
| AK000933 | 1 | 0 | 1 | 0 | 1 | 0 |
| AK000942 | 1 | 0 | 1 | 1 | 1 | 1 |
| AK000954 | 1 | 1 | 1 | 1 | 0 | 0 |
| AK000959 | 1 | 0 | 1 | 1 | 1 | 1 |
| AK000966 | 1 | 0 | 1 | 1 | 0 | 1 |
| AK000974 | 1 | 0 | 1 | 0 | 1 | 1 |
| AK001008 | 1 | 1 | 1 | 1 | 0 | 0 |
| AK001012 | 1 | 0 | 1 | 0 | 0 | 1 |
| AK001020 | 1 | 1 | 1 | 1 | 1 | 1 |



|          |   |   |   |   |   |   |
|----------|---|---|---|---|---|---|
| AK001024 | 1 | 1 | 1 | 1 | 1 | 1 |
| AK001036 | 1 | 0 | 1 | 0 | 1 | 1 |
| AK001038 | 1 | 0 | 1 | 1 | 0 | 0 |
| AK001052 | 1 | 0 | 1 | 0 | 0 | 1 |
| AK001060 | 1 | 0 | 0 | 0 | 0 | 0 |
| AK001076 | 1 | 0 | 1 | 0 | 0 | 1 |
| AK001083 | 1 | 0 | 1 | 0 | 0 | 1 |
| AK001099 | 1 | 0 | 1 | 0 | 1 | 1 |
| AK001101 | 1 | 0 | 1 | 0 | 0 | 0 |
| AK001125 | 0 | 0 | 1 | 0 | 0 | 0 |
| AK001134 | 1 | 0 | 1 | 0 | 0 | 0 |
| AK001139 | 1 | 0 | 0 | 0 | 0 | 0 |
| AK001164 | 1 | 1 | 1 | 1 | 1 | 0 |
| AK001228 | 1 | 0 | 1 | 0 | 1 | 0 |
| AK001279 | 1 | 1 | 1 | 1 | 1 | 1 |
| AK001308 | 1 | 0 | 1 | 0 | 0 | 0 |
| AK001394 | 1 | 0 | 1 | 0 | 0 | 1 |
| AK001432 | 1 | 0 | 1 | 0 | 0 | 1 |
| AK001469 | 1 | 1 | 1 | 1 | 1 | 1 |
| AK001567 | 1 | 0 | 1 | 1 | 0 | 0 |
| AK001590 | 1 | 1 | 1 | 1 | 0 | 1 |
| AK001604 | 1 | 1 | 1 | 1 | 0 | 1 |
| AK001627 | 1 | 0 | 1 | 0 | 0 | 1 |
| AK001638 | 1 | 1 | 1 | 1 | 0 | 1 |
| AK001647 | 1 | 0 | 1 | 1 | 1 | 1 |
| AK001672 | 1 | 1 | 1 | 1 | 1 | 1 |
| AK001716 | 1 | 1 | 1 | 1 | 0 | 0 |
| AK001732 | 1 | 0 | 1 | 0 | 0 | 1 |
| AK001781 | 1 | 1 | 1 | 0 | 0 | 1 |
| AK001808 | 1 | 0 | 1 | 0 | 0 | 0 |
| AK001838 | 1 | 0 | 1 | 0 | 0 | 1 |
| AK001846 | 1 | 0 | 1 | 0 | 0 | 0 |
| AK001856 | 1 | 1 | 1 | 0 | 1 | 1 |
| AK001889 | 1 | 0 | 1 | 1 | 0 | 0 |
| AK001903 | 1 | 1 | 1 | 1 | 0 | 1 |
| AK001906 | 1 | 0 | 1 | 0 | 0 | 0 |
| AK001918 | 1 | 0 | 0 | 0 | 0 | 1 |
| AK001936 | 1 | 1 | 1 | 1 | 1 | 1 |
| AK001957 | 1 | 0 | 1 | 0 | 0 | 0 |
| AK002014 | 1 | 0 | 1 | 1 | 1 | 1 |
| AK002016 | 1 | 1 | 1 | 1 | 0 | 0 |
| AK002036 | 1 | 1 | 1 | 1 | 1 | 1 |
| AK002039 | 1 | 1 | 1 | 1 | 0 | 1 |
| AK002088 | 1 | 0 | 1 | 0 | 0 | 1 |
| AK002107 | 0 | 0 | 0 | 0 | 0 | 1 |
| AK002171 | 1 | 0 | 1 | 1 | 0 | 0 |
| AK002173 | 1 | 1 | 1 | 1 | 0 | 1 |
| AK002208 | 1 | 0 | 0 | 0 | 0 | 0 |
| AK021426 | 0 | 0 | 0 | 0 | 0 | 1 |
| AK021428 | 1 | 0 | 1 | 0 | 0 | 0 |
| AK021439 | 1 | 0 | 0 | 0 | 0 | 1 |
| AK021459 | 1 | 1 | 1 | 1 | 0 | 0 |

|          |   |   |   |   |   |   |
|----------|---|---|---|---|---|---|
| AK021493 | 1 | 1 | 1 | 1 | 0 | 1 |
| AK021509 | 1 | 0 | 1 | 0 | 0 | 1 |
| AK021516 | 1 | 1 | 1 | 1 | 0 | 0 |
| AK021524 | 1 | 0 | 1 | 0 | 0 | 0 |
| AK021527 | 1 | 1 | 0 | 0 | 0 | 0 |
| AK021531 | 1 | 1 | 1 | 1 | 0 | 0 |
| AK021538 | 0 | 0 | 1 | 0 | 0 | 0 |
| AK021561 | 1 | 1 | 1 | 1 | 0 | 0 |
| AK021590 | 1 | 0 | 1 | 0 | 0 | 0 |
| AK021616 | 1 | 1 | 1 | 1 | 1 | 1 |
| AK021618 | 1 | 1 | 1 | 1 | 0 | 1 |
| AK021629 | 1 | 0 | 1 | 1 | 0 | 1 |
| AK021630 | 1 | 0 | 1 | 1 | 1 | 1 |
| AK021634 | 1 | 0 | 1 | 0 | 0 | 0 |
| AK021652 | 1 | 1 | 1 | 0 | 0 | 0 |
| AK021664 | 1 | 0 | 1 | 1 | 1 | 1 |
| AK021677 | 1 | 0 | 1 | 0 | 1 | 1 |
| AK021682 | 1 | 0 | 1 | 0 | 0 | 1 |
| AK021694 | 1 | 1 | 1 | 1 | 1 | 0 |
| AK021709 | 0 | 0 | 0 | 0 | 0 | 1 |
| AK021715 | 1 | 0 | 1 | 0 | 1 | 1 |
| AK021734 | 1 | 1 | 1 | 1 | 0 | 1 |
| AK021744 | 1 | 1 | 1 | 1 | 1 | 1 |
| AK021752 | 1 | 0 | 1 | 0 | 0 | 0 |
| AK021793 | 0 | 0 | 0 | 0 | 0 | 1 |
| AK021801 | 1 | 0 | 1 | 0 | 0 | 0 |
| AK021812 | 1 | 0 | 1 | 1 | 0 | 0 |
| AK021840 | 1 | 1 | 1 | 1 | 1 | 0 |
| AK021858 | 1 | 1 | 1 | 0 | 0 | 0 |
| AK021876 | 1 | 0 | 1 | 1 | 0 | 0 |
| AK021881 | 0 | 0 | 0 | 0 | 0 | 1 |
| AK021895 | 1 | 0 | 1 | 1 | 1 | 0 |
| AK021932 | 0 | 0 | 0 | 0 | 0 | 1 |
| AK021935 | 1 | 0 | 1 | 0 | 0 | 1 |
| AK021954 | 1 | 0 | 1 | 1 | 1 | 1 |
| AK021959 | 1 | 0 | 1 | 0 | 0 | 0 |
| AK021971 | 0 | 0 | 1 | 0 | 0 | 0 |
| AK021977 | 1 | 0 | 1 | 1 | 0 | 0 |
| AK021980 | 1 | 1 | 1 | 1 | 1 | 0 |
| AK021981 | 1 | 1 | 1 | 1 | 0 | 0 |
| AK022000 | 1 | 1 | 0 | 1 | 0 | 0 |
| AK022043 | 1 | 0 | 1 | 1 | 1 | 0 |
| AK022044 | 1 | 0 | 1 | 0 | 0 | 1 |
| AK022059 | 1 | 1 | 1 | 1 | 0 | 1 |
| AK022082 | 1 | 0 | 1 | 0 | 0 | 1 |
| AK022092 | 1 | 0 | 1 | 1 | 1 | 1 |
| AK022093 | 1 | 1 | 1 | 1 | 0 | 1 |
| AK022095 | 0 | 0 | 1 | 0 | 0 | 0 |
| AK022109 | 1 | 1 | 1 | 1 | 0 | 1 |
| AK022117 | 1 | 0 | 1 | 0 | 0 | 0 |
| AK022121 | 1 | 0 | 1 | 0 | 0 | 1 |
| AK022139 | 0 | 0 | 0 | 1 | 0 | 0 |

|          |   |   |   |   |   |   |
|----------|---|---|---|---|---|---|
| AK022162 | 1 | 1 | 1 | 1 | 1 | 1 |
| AK022173 | 1 | 0 | 1 | 0 | 0 | 0 |
| AK022185 | 1 | 0 | 1 | 0 | 1 | 1 |
| AK022186 | 1 | 0 | 1 | 0 | 0 | 0 |
| AK022191 | 1 | 0 | 1 | 0 | 0 | 1 |
| AK022264 | 1 | 1 | 1 | 1 | 0 | 0 |
| AK022265 | 1 | 1 | 0 | 0 | 0 | 1 |
| AK022286 | 1 | 0 | 0 | 0 | 0 | 1 |
| AK022292 | 1 | 0 | 1 | 0 | 1 | 1 |
| AK022310 | 1 | 0 | 1 | 0 | 0 | 0 |
| AK022321 | 0 | 0 | 1 | 0 | 0 | 0 |
| AK022326 | 1 | 0 | 1 | 1 | 0 | 0 |
| AK022342 | 1 | 0 | 1 | 0 | 1 | 1 |
| AK022346 | 1 | 0 | 1 | 0 | 0 | 0 |
| AK022351 | 1 | 0 | 1 | 0 | 0 | 1 |
| AK022352 | 1 | 1 | 1 | 1 | 1 | 1 |
| AK022379 | 1 | 0 | 1 | 1 | 0 | 1 |
| AK022383 | 1 | 1 | 1 | 1 | 0 | 0 |
| AK022390 | 1 | 0 | 1 | 1 | 0 | 0 |
| AK022428 | 1 | 0 | 1 | 1 | 0 | 1 |
| AK022429 | 1 | 0 | 1 | 1 | 0 | 1 |
| AK022437 | 1 | 0 | 1 | 0 | 1 | 1 |
| AK022473 | 1 | 0 | 1 | 0 | 0 | 1 |
| AK022474 | 1 | 0 | 1 | 0 | 0 | 0 |
| AK022479 | 1 | 1 | 1 | 1 | 0 | 1 |
| AK022482 | 0 | 0 | 0 | 0 | 0 | 1 |
| AK022628 | 1 | 1 | 1 | 1 | 1 | 1 |
| AK022635 | 0 | 0 | 1 | 0 | 0 | 0 |
| AK022741 | 1 | 0 | 1 | 0 | 0 | 0 |
| AK022759 | 1 | 0 | 1 | 0 | 0 | 0 |
| AK022789 | 1 | 1 | 1 | 1 | 1 | 1 |
| AK022801 | 1 | 0 | 1 | 0 | 0 | 0 |
| AK022817 | 1 | 0 | 1 | 0 | 1 | 0 |
| AK022836 | 1 | 1 | 1 | 1 | 1 | 1 |
| AK022846 | 1 | 0 | 1 | 1 | 0 | 1 |
| AK022869 | 1 | 0 | 1 | 0 | 0 | 0 |
| AK022892 | 1 | 0 | 1 | 1 | 0 | 0 |
| AK022898 | 1 | 0 | 0 | 0 | 0 | 0 |
| AK022963 | 1 | 1 | 1 | 0 | 0 | 0 |
| AK022989 | 1 | 0 | 1 | 0 | 0 | 1 |
| AK023027 | 1 | 0 | 1 | 0 | 0 | 0 |
| AK023055 | 1 | 0 | 0 | 0 | 0 | 0 |
| AK023058 | 1 | 0 | 1 | 1 | 0 | 1 |
| AK023134 | 1 | 1 | 1 | 1 | 0 | 1 |
| AK023140 | 1 | 0 | 1 | 1 | 1 | 1 |
| AK023152 | 1 | 1 | 1 | 1 | 0 | 1 |
| AK023156 | 1 | 0 | 1 | 0 | 0 | 0 |
| AK023162 | 1 | 1 | 1 | 1 | 0 | 0 |
| AK023187 | 1 | 0 | 1 | 0 | 0 | 0 |
| AK023199 | 1 | 1 | 1 | 1 | 0 | 0 |
| AK023244 | 1 | 0 | 1 | 0 | 1 | 1 |
| AK023296 | 1 | 0 | 1 | 0 | 0 | 1 |

|          |   |   |   |   |   |   |
|----------|---|---|---|---|---|---|
| AK023299 | 1 | 0 | 1 | 1 | 1 | 1 |
| AK023302 | 1 | 0 | 1 | 0 | 0 | 1 |
| AK023330 | 1 | 1 | 1 | 1 | 1 | 1 |
| AK023336 | 1 | 0 | 1 | 0 | 0 | 0 |
| AK023357 | 1 | 0 | 1 | 1 | 1 | 0 |
| AK023363 | 1 | 0 | 1 | 0 | 0 | 1 |
| AK023367 | 1 | 0 | 1 | 0 | 0 | 0 |
| AK023375 | 1 | 0 | 0 | 0 | 0 | 0 |
| AK023391 | 1 | 1 | 1 | 1 | 1 | 1 |
| AK023395 | 1 | 0 | 1 | 0 | 0 | 1 |
| AK023401 | 0 | 0 | 0 | 0 | 1 | 0 |
| AK023412 | 1 | 0 | 1 | 0 | 0 | 1 |
| AK023426 | 1 | 0 | 1 | 0 | 0 | 0 |
| AK023474 | 1 | 0 | 1 | 0 | 0 | 1 |
| AK023485 | 1 | 0 | 1 | 0 | 0 | 0 |
| AK023526 | 1 | 1 | 1 | 1 | 1 | 1 |
| AK023542 | 1 | 0 | 1 | 0 | 0 | 1 |
| AK023547 | 1 | 0 | 1 | 0 | 1 | 1 |
| AK023551 | 1 | 0 | 1 | 0 | 0 | 0 |
| AK023565 | 1 | 0 | 1 | 1 | 0 | 0 |
| AK023574 | 1 | 1 | 1 | 1 | 1 | 1 |
| AK023598 | 1 | 1 | 1 | 1 | 1 | 1 |
| AK023601 | 1 | 0 | 1 | 0 | 0 | 1 |
| AK023614 | 1 | 1 | 1 | 0 | 0 | 0 |
| AK023619 | 1 | 0 | 0 | 0 | 0 | 0 |
| AK023633 | 1 | 0 | 1 | 0 | 0 | 1 |
| AK023662 | 1 | 0 | 1 | 0 | 0 | 1 |
| AK023717 | 1 | 0 | 1 | 1 | 1 | 1 |
| AK023718 | 1 | 1 | 1 | 1 | 0 | 1 |
| AK023727 | 1 | 0 | 1 | 1 | 0 | 0 |
| AK023748 | 0 | 0 | 0 | 0 | 0 | 1 |
| AK023768 | 1 | 1 | 1 | 1 | 0 | 1 |
| AK023783 | 1 | 0 | 1 | 1 | 0 | 1 |
| AK023802 | 1 | 1 | 1 | 1 | 1 | 1 |
| AK023803 | 1 | 0 | 1 | 0 | 0 | 1 |
| AK023811 | 0 | 0 | 0 | 0 | 0 | 1 |
| AK023829 | 0 | 0 | 0 | 0 | 0 | 1 |
| AK023852 | 1 | 1 | 1 | 1 | 0 | 0 |
| AK023877 | 1 | 1 | 1 | 1 | 0 | 1 |
| AK023883 | 1 | 0 | 1 | 0 | 0 | 0 |
| AK023892 | 1 | 0 | 1 | 1 | 1 | 1 |
| AK023912 | 1 | 1 | 0 | 0 | 0 | 1 |
| AK023918 | 1 | 0 | 1 | 1 | 0 | 0 |
| AK023936 | 0 | 1 | 0 | 0 | 0 | 0 |
| AK023942 | 1 | 0 | 1 | 0 | 1 | 0 |
| AK023947 | 1 | 0 | 1 | 0 | 0 | 1 |
| AK023948 | 1 | 0 | 1 | 1 | 0 | 0 |
| AK023999 | 1 | 1 | 1 | 1 | 0 | 1 |
| AK024035 | 1 | 1 | 1 | 1 | 1 | 1 |
| AK024092 | 1 | 0 | 1 | 0 | 0 | 1 |
| AK024099 | 0 | 0 | 0 | 0 | 0 | 1 |
| AK024106 | 1 | 1 | 1 | 0 | 0 | 0 |

|          |   |   |   |   |   |   |
|----------|---|---|---|---|---|---|
| AK024118 | 1 | 1 | 1 | 1 | 0 | 1 |
| AK024121 | 1 | 1 | 1 | 1 | 0 | 1 |
| AK024135 | 1 | 1 | 1 | 0 | 0 | 1 |
| AK024156 | 1 | 0 | 1 | 0 | 1 | 1 |
| AK024164 | 1 | 0 | 1 | 0 | 1 | 1 |
| AK024229 | 1 | 1 | 1 | 1 | 0 | 0 |
| AK024304 | 1 | 0 | 1 | 1 | 1 | 1 |
| AK024330 | 1 | 0 | 1 | 1 | 0 | 0 |
| AK024366 | 1 | 0 | 1 | 1 | 0 | 1 |
| AK024380 | 1 | 0 | 1 | 1 | 1 | 1 |
| AK024385 | 1 | 1 | 1 | 0 | 0 | 0 |
| AK024423 | 1 | 1 | 1 | 1 | 0 | 1 |
| AK024427 | 1 | 1 | 1 | 1 | 1 | 0 |
| AK024443 | 1 | 1 | 1 | 1 | 1 | 1 |
| AK024460 | 1 | 0 | 1 | 0 | 0 | 1 |
| AK024495 | 1 | 0 | 1 | 1 | 1 | 1 |
| AK024517 | 1 | 0 | 1 | 0 | 0 | 1 |
| AK024525 | 1 | 0 | 0 | 0 | 0 | 0 |
| AK024545 | 1 | 0 | 1 | 1 | 1 | 1 |
| AK024548 | 1 | 0 | 1 | 0 | 0 | 1 |
| AK024580 | 0 | 0 | 0 | 0 | 0 | 1 |
| AK024592 | 1 | 0 | 1 | 0 | 0 | 0 |
| AK024594 | 1 | 0 | 1 | 0 | 0 | 0 |
| AK024597 | 1 | 0 | 1 | 1 | 1 | 1 |
| AK024612 | 1 | 0 | 1 | 0 | 0 | 1 |
| AK024629 | 1 | 0 | 1 | 0 | 0 | 1 |
| AK024650 | 1 | 1 | 1 | 1 | 0 | 1 |
| AK024653 | 1 | 0 | 1 | 0 | 0 | 0 |
| AK024689 | 0 | 1 | 0 | 0 | 0 | 0 |
| AK024738 | 1 | 0 | 1 | 1 | 0 | 1 |
| AK024775 | 1 | 1 | 1 | 1 | 0 | 1 |
| AK024779 | 1 | 0 | 1 | 0 | 1 | 1 |
| AK024842 | 1 | 1 | 1 | 1 | 1 | 1 |
| AK024852 | 1 | 1 | 1 | 1 | 0 | 1 |
| AK024863 | 1 | 1 | 1 | 1 | 0 | 1 |
| AK024864 | 1 | 1 | 0 | 0 | 0 | 1 |
| AK024868 | 1 | 1 | 1 | 1 | 0 | 0 |
| AK024870 | 1 | 0 | 1 | 1 | 1 | 1 |
| AK024876 | 1 | 0 | 1 | 0 | 0 | 1 |
| AK024877 | 1 | 0 | 1 | 0 | 0 | 1 |
| AK024886 | 1 | 1 | 1 | 1 | 0 | 0 |
| AK024900 | 1 | 1 | 1 | 0 | 0 | 1 |
| AK024910 | 1 | 1 | 0 | 0 | 0 | 1 |
| AK024921 | 1 | 0 | 1 | 0 | 1 | 1 |
| AK024944 | 1 | 0 | 1 | 0 | 0 | 0 |
| AK024950 | 1 | 1 | 1 | 0 | 0 | 0 |
| AK024956 | 1 | 1 | 1 | 1 | 0 | 1 |
| AK024968 | 1 | 0 | 0 | 0 | 0 | 1 |
| AK024986 | 1 | 1 | 1 | 1 | 0 | 0 |
| AK024995 | 1 | 1 | 1 | 1 | 0 | 0 |
| AK025003 | 1 | 0 | 1 | 0 | 0 | 0 |
| AK025011 | 1 | 0 | 1 | 0 | 0 | 0 |

|          |   |   |   |   |   |   |
|----------|---|---|---|---|---|---|
| AK025044 | 0 | 1 | 0 | 0 | 0 | 0 |
| AK025045 | 1 | 1 | 1 | 1 | 0 | 1 |
| AK025053 | 1 | 0 | 1 | 0 | 0 | 1 |
| AK025062 | 1 | 0 | 1 | 0 | 1 | 1 |
| AK025078 | 1 | 0 | 1 | 0 | 0 | 0 |
| AK025081 | 1 | 0 | 1 | 0 | 0 | 1 |
| AK025100 | 1 | 1 | 1 | 1 | 0 | 1 |
| AK025126 | 1 | 0 | 1 | 1 | 0 | 1 |
| AK025143 | 1 | 1 | 1 | 1 | 0 | 1 |
| AK025156 | 1 | 0 | 1 | 0 | 0 | 1 |
| AK025173 | 1 | 1 | 1 | 1 | 1 | 1 |
| AK025198 | 1 | 1 | 1 | 1 | 0 | 0 |
| AK025205 | 1 | 1 | 1 | 1 | 0 | 0 |
| AK025209 | 1 | 0 | 1 | 1 | 1 | 1 |
| AK025242 | 1 | 0 | 1 | 0 | 0 | 1 |
| AK025246 | 1 | 1 | 1 | 1 | 1 | 1 |
| AK025276 | 1 | 0 | 1 | 0 | 1 | 1 |
| AK025312 | 1 | 0 | 1 | 0 | 1 | 1 |
| AK025344 | 1 | 0 | 1 | 1 | 1 | 0 |
| AK025352 | 1 | 0 | 1 | 1 | 0 | 0 |
| AK025378 | 1 | 0 | 1 | 0 | 0 | 1 |
| AK025527 | 1 | 1 | 1 | 1 | 0 | 0 |
| AK025548 | 1 | 0 | 1 | 0 | 1 | 1 |
| AK025613 | 1 | 0 | 1 | 0 | 1 | 1 |
| AK025650 | 1 | 0 | 1 | 1 | 1 | 0 |
| AK025784 | 1 | 0 | 1 | 0 | 0 | 0 |
| AK025797 | 1 | 0 | 1 | 1 | 0 | 0 |
| AK025833 | 1 | 1 | 1 | 0 | 0 | 1 |
| AK025893 | 1 | 0 | 1 | 1 | 0 | 0 |
| AK025909 | 1 | 0 | 1 | 0 | 1 | 1 |
| AK025953 | 1 | 0 | 1 | 0 | 0 | 1 |
| AK026078 | 1 | 1 | 1 | 1 | 0 | 1 |
| AK026099 | 1 | 0 | 1 | 0 | 0 | 0 |
| AK026181 | 1 | 1 | 1 | 1 | 1 | 1 |
| AK026195 | 1 | 0 | 1 | 0 | 1 | 0 |
| AK026215 | 1 | 0 | 1 | 0 | 0 | 1 |
| AK026241 | 1 | 0 | 1 | 0 | 0 | 1 |
| AK026247 | 1 | 1 | 1 | 1 | 0 | 1 |
| AK026259 | 1 | 0 | 1 | 0 | 0 | 1 |
| AK026267 | 1 | 1 | 1 | 1 | 0 | 0 |
| AK026286 | 1 | 0 | 1 | 1 | 0 | 1 |
| AK026295 | 1 | 0 | 1 | 1 | 0 | 0 |
| AK026304 | 1 | 1 | 0 | 0 | 0 | 0 |
| AK026320 | 1 | 0 | 0 | 0 | 0 | 0 |
| AK026321 | 1 | 1 | 1 | 1 | 0 | 0 |
| AK026328 | 1 | 0 | 1 | 0 | 1 | 0 |
| AK026340 | 0 | 0 | 0 | 0 | 0 | 1 |
| AK026351 | 1 | 1 | 1 | 1 | 0 | 0 |
| AK026368 | 1 | 0 | 1 | 1 | 0 | 1 |
| AK026373 | 1 | 0 | 1 | 0 | 0 | 0 |
| AK026407 | 1 | 0 | 1 | 0 | 0 | 0 |
| AK026442 | 1 | 0 | 1 | 0 | 0 | 0 |

|          |   |   |   |   |   |   |
|----------|---|---|---|---|---|---|
| AK026466 | 1 | 0 | 1 | 0 | 0 | 0 |
| AK026495 | 1 | 0 | 1 | 0 | 0 | 0 |
| AK026499 | 1 | 1 | 1 | 0 | 0 | 1 |
| AK026701 | 0 | 0 | 0 | 1 | 0 | 0 |
| AK026743 | 1 | 0 | 1 | 0 | 0 | 1 |
| AK026761 | 1 | 1 | 1 | 1 | 1 | 1 |
| AK026768 | 1 | 0 | 1 | 1 | 0 | 1 |
| AK026778 | 1 | 1 | 1 | 0 | 0 | 1 |
| AK026805 | 1 | 0 | 1 | 1 | 0 | 1 |
| AK026816 | 1 | 0 | 1 | 0 | 0 | 0 |
| AK026818 | 1 | 0 | 1 | 0 | 0 | 1 |
| AK026820 | 1 | 0 | 1 | 0 | 0 | 1 |
| AK026868 | 1 | 0 | 0 | 0 | 0 | 0 |
| AK026878 | 1 | 0 | 1 | 0 | 0 | 0 |
| AK026891 | 1 | 0 | 1 | 1 | 0 | 0 |
| AK026893 | 1 | 1 | 1 | 1 | 1 | 1 |
| AK026895 | 1 | 0 | 1 | 0 | 0 | 0 |
| AK026900 | 1 | 0 | 1 | 0 | 1 | 0 |
| AK026905 | 1 | 1 | 1 | 1 | 0 | 1 |
| AK026942 | 1 | 1 | 1 | 1 | 1 | 1 |
| AK026947 | 1 | 0 | 1 | 0 | 0 | 1 |
| AK027027 | 1 | 0 | 1 | 0 | 0 | 0 |
| AK027082 | 1 | 0 | 1 | 1 | 0 | 0 |
| AK027101 | 1 | 1 | 1 | 1 | 0 | 0 |
| AK027134 | 1 | 0 | 1 | 0 | 0 | 0 |
| AK027160 | 1 | 0 | 1 | 0 | 1 | 0 |
| AK027219 | 1 | 0 | 1 | 0 | 0 | 0 |
| AK027233 | 1 | 0 | 1 | 0 | 0 | 1 |
| AK027239 | 1 | 1 | 1 | 0 | 1 | 1 |
| AK027246 | 0 | 0 | 1 | 0 | 0 | 0 |
| AK027368 | 1 | 1 | 1 | 1 | 0 | 1 |
| AK027555 | 1 | 0 | 1 | 0 | 1 | 1 |
| AK027579 | 1 | 1 | 1 | 0 | 1 | 0 |
| AK027738 | 1 | 0 | 1 | 1 | 1 | 1 |
| AK027795 | 1 | 0 | 1 | 0 | 0 | 0 |
| AK027883 | 1 | 0 | 0 | 0 | 0 | 1 |
| AK054562 | 1 | 0 | 1 | 0 | 0 | 1 |
| AK054569 | 1 | 1 | 1 | 1 | 0 | 0 |
| AK054570 | 1 | 0 | 1 | 0 | 1 | 1 |
| AK054622 | 1 | 1 | 1 | 1 | 1 | 1 |
| AK054718 | 1 | 1 | 1 | 0 | 1 | 1 |
| AK054741 | 1 | 0 | 1 | 0 | 1 | 0 |
| AK054746 | 1 | 0 | 1 | 0 | 0 | 0 |
| AK054755 | 0 | 1 | 0 | 1 | 0 | 0 |
| AK054759 | 1 | 0 | 1 | 0 | 0 | 1 |
| AK054764 | 1 | 0 | 1 | 1 | 1 | 1 |
| AK054768 | 1 | 0 | 1 | 1 | 1 | 1 |
| AK054795 | 1 | 1 | 1 | 1 | 0 | 1 |
| AK054808 | 1 | 0 | 1 | 0 | 0 | 1 |
| AK054824 | 0 | 0 | 0 | 0 | 0 | 1 |
| AK054829 | 1 | 1 | 1 | 1 | 0 | 0 |
| AK054864 | 1 | 1 | 1 | 0 | 0 | 0 |

|          |   |   |   |   |   |   |
|----------|---|---|---|---|---|---|
| AK054870 | 1 | 0 | 0 | 0 | 0 | 0 |
| AK054892 | 1 | 0 | 1 | 0 | 0 | 0 |
| AK054893 | 1 | 0 | 1 | 0 | 1 | 1 |
| AK054894 | 1 | 0 | 1 | 1 | 0 | 0 |
| AK054910 | 1 | 1 | 1 | 1 | 0 | 0 |
| AK054931 | 1 | 0 | 1 | 0 | 0 | 1 |
| AK054933 | 1 | 1 | 1 | 1 | 0 | 0 |
| AK054946 | 1 | 0 | 1 | 1 | 0 | 1 |
| AK054952 | 1 | 1 | 1 | 0 | 0 | 0 |
| AK054959 | 1 | 0 | 1 | 0 | 1 | 1 |
| AK054971 | 1 | 1 | 1 | 1 | 1 | 1 |
| AK054973 | 1 | 0 | 1 | 1 | 0 | 1 |
| AK054979 | 1 | 0 | 1 | 0 | 0 | 0 |
| AK054984 | 1 | 1 | 1 | 1 | 0 | 1 |
| AK054990 | 1 | 0 | 1 | 1 | 1 | 1 |
| AK055014 | 1 | 0 | 1 | 1 | 1 | 1 |
| AK055153 | 1 | 0 | 0 | 0 | 0 | 1 |
| AK055225 | 1 | 1 | 1 | 1 | 1 | 1 |
| AK055239 | 1 | 1 | 1 | 0 | 0 | 1 |
| AK055250 | 1 | 0 | 1 | 1 | 0 | 1 |
| AK055280 | 1 | 0 | 0 | 0 | 0 | 0 |
| AK055284 | 1 | 0 | 1 | 1 | 0 | 0 |
| AK055287 | 1 | 1 | 1 | 1 | 0 | 1 |
| AK055302 | 0 | 0 | 0 | 0 | 0 | 1 |
| AK055324 | 1 | 0 | 1 | 0 | 0 | 0 |
| AK055338 | 0 | 0 | 0 | 0 | 0 | 1 |
| AK055340 | 1 | 1 | 1 | 0 | 0 | 0 |
| AK055361 | 0 | 0 | 0 | 0 | 0 | 1 |
| AK055362 | 0 | 0 | 0 | 0 | 0 | 1 |
| AK055364 | 1 | 0 | 1 | 0 | 0 | 0 |
| AK055378 | 1 | 1 | 1 | 1 | 1 | 1 |
| AK055386 | 0 | 0 | 1 | 0 | 0 | 0 |
| AK055431 | 1 | 1 | 1 | 1 | 1 | 1 |
| AK055438 | 1 | 0 | 1 | 0 | 0 | 1 |
| AK055457 | 1 | 0 | 1 | 1 | 0 | 0 |
| AK055458 | 1 | 1 | 1 | 0 | 0 | 0 |
| AK055479 | 1 | 1 | 1 | 1 | 1 | 0 |
| AK055482 | 0 | 0 | 0 | 0 | 0 | 1 |
| AK055485 | 1 | 1 | 1 | 1 | 0 | 0 |
| AK055495 | 1 | 1 | 1 | 0 | 0 | 1 |
| AK055501 | 1 | 1 | 1 | 1 | 1 | 0 |
| AK055528 | 1 | 0 | 1 | 0 | 0 | 0 |
| AK055553 | 1 | 0 | 1 | 0 | 1 | 0 |
| AK055562 | 1 | 0 | 1 | 0 | 0 | 0 |
| AK055564 | 1 | 0 | 1 | 0 | 0 | 0 |
| AK055572 | 1 | 1 | 1 | 1 | 0 | 1 |
| AK055583 | 1 | 0 | 1 | 1 | 0 | 1 |
| AK055584 | 1 | 1 | 1 | 1 | 0 | 0 |
| AK055585 | 1 | 0 | 1 | 0 | 0 | 0 |
| AK055641 | 1 | 0 | 1 | 1 | 0 | 0 |
| AK055650 | 1 | 0 | 1 | 1 | 1 | 1 |
| AK055661 | 1 | 0 | 1 | 1 | 1 | 1 |



|          |   |   |   |   |   |   |
|----------|---|---|---|---|---|---|
| AK055674 | 1 | 0 | 1 | 1 | 0 | 1 |
| AK055679 | 1 | 1 | 1 | 1 | 1 | 0 |
| AK055696 | 0 | 0 | 0 | 0 | 0 | 1 |
| AK055698 | 1 | 0 | 1 | 0 | 0 | 0 |
| AK055705 | 0 | 0 | 0 | 0 | 0 | 1 |
| AK055725 | 1 | 1 | 1 | 1 | 1 | 1 |
| AK055794 | 0 | 0 | 0 | 0 | 0 | 1 |
| AK055800 | 1 | 1 | 1 | 1 | 0 | 1 |
| AK055807 | 1 | 1 | 1 | 1 | 0 | 1 |
| AK055808 | 1 | 1 | 1 | 1 | 1 | 1 |
| AK055809 | 1 | 0 | 1 | 0 | 0 | 0 |
| AK055841 | 0 | 1 | 1 | 0 | 0 | 1 |
| AK055859 | 1 | 0 | 1 | 0 | 0 | 1 |
| AK055861 | 1 | 0 | 1 | 0 | 1 | 0 |
| AK055913 | 1 | 0 | 1 | 1 | 0 | 0 |
| AK055928 | 1 | 0 | 1 | 0 | 0 | 0 |
| AK055930 | 1 | 0 | 1 | 0 | 0 | 0 |
| AK055942 | 1 | 0 | 1 | 0 | 0 | 0 |
| AK055947 | 1 | 0 | 1 | 0 | 0 | 1 |
| AK056003 | 1 | 1 | 1 | 1 | 0 | 1 |
| AK056005 | 1 | 0 | 1 | 0 | 0 | 1 |
| AK056007 | 1 | 0 | 1 | 0 | 1 | 1 |
| AK056019 | 1 | 1 | 1 | 1 | 1 | 1 |
| AK056037 | 1 | 1 | 1 | 0 | 1 | 1 |
| AK056051 | 1 | 1 | 1 | 1 | 1 | 0 |
| AK056063 | 1 | 1 | 1 | 1 | 1 | 1 |
| AK056076 | 0 | 0 | 0 | 1 | 0 | 1 |
| AK056096 | 1 | 1 | 1 | 1 | 1 | 1 |
| AK056110 | 1 | 1 | 1 | 1 | 0 | 0 |
| AK056115 | 1 | 1 | 1 | 1 | 0 | 1 |
| AK056136 | 0 | 1 | 0 | 0 | 0 | 0 |
| AK056142 | 1 | 0 | 0 | 0 | 0 | 0 |
| AK056146 | 1 | 0 | 1 | 1 | 0 | 0 |
| AK056173 | 1 | 0 | 1 | 0 | 0 | 0 |
| AK056178 | 1 | 1 | 1 | 1 | 1 | 1 |
| AK056227 | 1 | 0 | 1 | 0 | 0 | 0 |
| AK056228 | 1 | 1 | 1 | 1 | 0 | 1 |
| AK056229 | 1 | 0 | 0 | 0 | 0 | 1 |
| AK056264 | 1 | 1 | 1 | 1 | 0 | 1 |
| AK056381 | 1 | 0 | 1 | 1 | 0 | 0 |
| AK056396 | 1 | 0 | 1 | 1 | 0 | 1 |
| AK056490 | 1 | 0 | 1 | 0 | 0 | 0 |
| AK056511 | 1 | 1 | 1 | 1 | 0 | 1 |
| AK056521 | 1 | 0 | 1 | 1 | 1 | 1 |
| AK056572 | 0 | 0 | 0 | 0 | 0 | 1 |
| AK056578 | 1 | 1 | 1 | 1 | 1 | 1 |
| AK056598 | 1 | 1 | 1 | 1 | 0 | 0 |
| AK056612 | 1 | 0 | 1 | 0 | 0 | 0 |
| AK056629 | 1 | 0 | 1 | 0 | 0 | 0 |
| AK056651 | 1 | 0 | 1 | 0 | 0 | 0 |
| AK056676 | 1 | 0 | 1 | 0 | 0 | 1 |
| AK056718 | 1 | 0 | 1 | 0 | 0 | 0 |

|          |   |   |   |   |   |   |
|----------|---|---|---|---|---|---|
| AK056723 | 0 | 0 | 1 | 0 | 1 | 0 |
| AK056734 | 1 | 1 | 1 | 1 | 0 | 1 |
| AK056744 | 1 | 0 | 1 | 0 | 1 | 1 |
| AK056769 | 1 | 1 | 1 | 1 | 0 | 0 |
| AK056770 | 0 | 0 | 0 | 0 | 0 | 1 |
| AK056771 | 1 | 1 | 1 | 1 | 0 | 1 |
| AK056784 | 1 | 0 | 0 | 0 | 0 | 0 |
| AK056804 | 1 | 1 | 1 | 1 | 1 | 1 |
| AK056809 | 1 | 0 | 1 | 0 | 0 | 0 |
| AK056901 | 1 | 1 | 1 | 1 | 0 | 1 |
| AK056904 | 1 | 0 | 0 | 0 | 0 | 0 |
| AK056926 | 1 | 0 | 1 | 1 | 0 | 0 |
| AK056929 | 1 | 0 | 1 | 0 | 0 | 1 |
| AK056930 | 1 | 0 | 1 | 0 | 0 | 1 |
| AK056954 | 1 | 0 | 1 | 0 | 0 | 0 |
| AK056972 | 1 | 1 | 1 | 1 | 0 | 1 |
| AK056976 | 0 | 0 | 1 | 0 | 0 | 0 |
| AK056995 | 1 | 0 | 1 | 0 | 0 | 1 |
| AK056999 | 1 | 0 | 1 | 0 | 0 | 1 |
| AK057016 | 1 | 1 | 1 | 1 | 0 | 1 |
| AK057017 | 1 | 1 | 1 | 0 | 0 | 1 |
| AK057055 | 1 | 0 | 1 | 0 | 1 | 0 |
| AK057062 | 1 | 0 | 1 | 0 | 0 | 1 |
| AK057071 | 1 | 0 | 1 | 1 | 1 | 0 |
| AK057085 | 1 | 1 | 1 | 1 | 1 | 1 |
| AK057167 | 1 | 0 | 1 | 0 | 0 | 1 |
| AK057179 | 1 | 0 | 1 | 1 | 1 | 1 |
| AK057217 | 1 | 1 | 1 | 1 | 0 | 0 |
| AK057219 | 1 | 1 | 1 | 1 | 0 | 0 |
| AK057241 | 1 | 0 | 1 | 0 | 1 | 0 |
| AK057242 | 1 | 0 | 1 | 1 | 0 | 0 |
| AK057246 | 0 | 0 | 1 | 0 | 0 | 1 |
| AK057252 | 1 | 0 | 0 | 0 | 0 | 0 |
| AK057259 | 1 | 1 | 1 | 1 | 1 | 1 |
| AK057293 | 1 | 0 | 1 | 1 | 1 | 1 |
| AK057297 | 0 | 0 | 1 | 0 | 0 | 0 |
| AK057335 | 1 | 1 | 1 | 1 | 0 | 1 |
| AK057402 | 1 | 0 | 1 | 0 | 0 | 0 |
| AK057422 | 1 | 0 | 1 | 0 | 0 | 0 |
| AK057429 | 1 | 0 | 1 | 0 | 0 | 0 |
| AK057452 | 1 | 1 | 1 | 1 | 1 | 1 |
| AK057470 | 1 | 0 | 1 | 0 | 1 | 0 |
| AK057491 | 1 | 0 | 1 | 0 | 0 | 1 |
| AK057499 | 1 | 0 | 1 | 1 | 0 | 0 |
| AK057500 | 0 | 0 | 0 | 0 | 0 | 1 |
| AK057539 | 1 | 0 | 1 | 0 | 0 | 0 |
| AK057568 | 1 | 1 | 1 | 1 | 1 | 1 |
| AK057576 | 1 | 1 | 1 | 1 | 0 | 0 |
| AK057637 | 1 | 0 | 0 | 0 | 0 | 0 |
| AK057653 | 1 | 0 | 1 | 1 | 0 | 1 |
| AK057657 | 1 | 0 | 1 | 0 | 0 | 0 |
| AK057669 | 1 | 1 | 1 | 1 | 1 | 1 |

|             |   |   |   |   |   |   |
|-------------|---|---|---|---|---|---|
| AK057672    | 1 | 0 | 1 | 1 | 0 | 0 |
| AK057713    | 1 | 1 | 1 | 0 | 1 | 1 |
| AK057728    | 1 | 0 | 1 | 0 | 0 | 1 |
| AK057730    | 1 | 1 | 1 | 1 | 1 | 1 |
| AK057742    | 1 | 1 | 1 | 1 | 0 | 1 |
| AK057759    | 1 | 0 | 1 | 0 | 1 | 1 |
| AK057772    | 1 | 0 | 1 | 0 | 1 | 1 |
| AK057786    | 0 | 0 | 0 | 0 | 0 | 1 |
| AK057804    | 1 | 0 | 1 | 0 | 0 | 1 |
| AK057835    | 1 | 1 | 1 | 0 | 0 | 0 |
| AK057852    | 1 | 0 | 1 | 1 | 0 | 0 |
| AK057857    | 1 | 1 | 1 | 1 | 0 | 0 |
| AK057858    | 1 | 0 | 1 | 0 | 0 | 1 |
| AK057874    | 1 | 0 | 1 | 1 | 0 | 0 |
| AK057905    | 1 | 1 | 1 | 0 | 0 | 1 |
| AK057907    | 1 | 0 | 1 | 0 | 0 | 1 |
| AK057970    | 1 | 0 | 1 | 0 | 0 | 1 |
| AK057974    | 0 | 0 | 0 | 1 | 0 | 0 |
| AK057980    | 1 | 0 | 1 | 0 | 0 | 1 |
| AK057984    | 1 | 0 | 1 | 0 | 0 | 0 |
| AK058041    | 1 | 0 | 1 | 0 | 1 | 1 |
| AK058047    | 1 | 0 | 1 | 0 | 0 | 0 |
| AK058070    | 0 | 0 | 0 | 1 | 0 | 0 |
| AK058074    | 1 | 0 | 1 | 0 | 0 | 0 |
| AK058157    | 1 | 0 | 0 | 0 | 0 | 1 |
| AK074041    | 1 | 0 | 1 | 0 | 1 | 1 |
| AK074085    | 1 | 1 | 1 | 1 | 0 | 1 |
| AK074100    | 1 | 1 | 1 | 0 | 0 | 1 |
| AK074143    | 1 | 1 | 1 | 1 | 0 | 1 |
| AK074231    | 1 | 1 | 1 | 0 | 0 | 1 |
| AK074450    | 1 | 1 | 1 | 1 | 0 | 1 |
| AL035297    | 1 | 0 | 1 | 0 | 0 | 1 |
| AL037737_RC | 1 | 0 | 1 | 1 | 0 | 1 |
| AL041224_RC | 1 | 1 | 1 | 1 | 1 | 1 |
| AL049227    | 0 | 0 | 1 | 0 | 0 | 0 |
| AL049251    | 1 | 0 | 1 | 0 | 0 | 0 |
| AL049260    | 0 | 1 | 0 | 0 | 0 | 0 |
| AL049265    | 1 | 1 | 1 | 1 | 0 | 1 |
| AL049268    | 0 | 0 | 0 | 0 | 0 | 1 |
| AL049270    | 1 | 0 | 1 | 0 | 0 | 1 |
| AL049274    | 1 | 1 | 1 | 1 | 0 | 1 |
| AL049279    | 1 | 0 | 1 | 1 | 1 | 1 |
| AL049300    | 1 | 0 | 1 | 0 | 0 | 1 |
| AL049302    | 1 | 0 | 0 | 0 | 0 | 0 |
| AL049312    | 1 | 0 | 1 | 0 | 0 | 0 |
| AL049313    | 1 | 1 | 1 | 1 | 1 | 0 |
| AL049321    | 1 | 0 | 1 | 0 | 0 | 0 |
| AL049335    | 1 | 1 | 1 | 1 | 0 | 1 |
| AL049336    | 1 | 0 | 1 | 0 | 0 | 1 |
| AL049337    | 1 | 0 | 1 | 0 | 0 | 1 |
| AL049340    | 1 | 0 | 1 | 0 | 1 | 1 |
| AL049353    | 1 | 0 | 1 | 0 | 0 | 1 |

|          |   |   |   |   |   |   |
|----------|---|---|---|---|---|---|
| AL049354 | 1 | 0 | 1 | 0 | 0 | 1 |
| AL049356 | 1 | 0 | 1 | 1 | 0 | 0 |
| AL049357 | 0 | 0 | 1 | 0 | 0 | 0 |
| AL049365 | 1 | 1 | 1 | 1 | 0 | 1 |
| AL049370 | 1 | 0 | 1 | 0 | 0 | 0 |
| AL049378 | 1 | 0 | 1 | 0 | 0 | 0 |
| AL049381 | 1 | 0 | 1 | 0 | 1 | 1 |
| AL049387 | 1 | 0 | 1 | 0 | 0 | 1 |
| AL049397 | 1 | 0 | 1 | 0 | 0 | 0 |
| AL049417 | 1 | 1 | 1 | 1 | 0 | 0 |
| AL049423 | 1 | 1 | 1 | 1 | 1 | 1 |
| AL049428 | 1 | 0 | 0 | 0 | 0 | 0 |
| AL049435 | 1 | 1 | 1 | 1 | 0 | 1 |
| AL049442 | 1 | 0 | 1 | 0 | 1 | 1 |
| AL049443 | 1 | 1 | 0 | 0 | 0 | 1 |
| AL049447 | 1 | 0 | 1 | 0 | 0 | 0 |
| AL049449 | 1 | 1 | 1 | 1 | 0 | 1 |
| AL049450 | 1 | 1 | 1 | 1 | 0 | 1 |
| AL049471 | 1 | 0 | 1 | 1 | 1 | 1 |
| AL049689 | 1 | 0 | 0 | 0 | 0 | 1 |
| AL049782 | 1 | 1 | 1 | 1 | 0 | 0 |
| AL049919 | 1 | 0 | 1 | 0 | 0 | 0 |
| AL049943 | 1 | 0 | 1 | 0 | 0 | 1 |
| AL049951 | 1 | 1 | 1 | 1 | 1 | 1 |
| AL049955 | 1 | 1 | 1 | 1 | 0 | 0 |
| AL049957 | 1 | 1 | 1 | 1 | 1 | 1 |
| AL049965 | 0 | 0 | 1 | 0 | 0 | 0 |
| AL049969 | 1 | 0 | 1 | 0 | 0 | 0 |
| AL049998 | 1 | 0 | 1 | 0 | 0 | 0 |
| AL049999 | 1 | 0 | 1 | 0 | 0 | 1 |
| AL050004 | 1 | 1 | 1 | 1 | 0 | 1 |
| AL050013 | 1 | 0 | 1 | 0 | 1 | 1 |
| AL050020 | 1 | 1 | 1 | 0 | 0 | 1 |
| AL050021 | 1 | 1 | 1 | 1 | 0 | 1 |
| AL050027 | 1 | 0 | 1 | 0 | 0 | 0 |
| AL050042 | 1 | 0 | 0 | 0 | 0 | 0 |
| AL050050 | 1 | 0 | 1 | 0 | 1 | 0 |
| AL050053 | 1 | 1 | 1 | 1 | 1 | 1 |
| AL050061 | 1 | 0 | 1 | 1 | 1 | 1 |
| AL050064 | 1 | 0 | 1 | 0 | 0 | 0 |
| AL050068 | 1 | 0 | 1 | 1 | 1 | 1 |
| AL050078 | 1 | 0 | 1 | 0 | 0 | 1 |
| AL050125 | 1 | 0 | 1 | 0 | 0 | 1 |
| AL050136 | 1 | 0 | 1 | 0 | 0 | 0 |
| AL050137 | 1 | 1 | 1 | 1 | 0 | 0 |
| AL050143 | 1 | 0 | 1 | 1 | 1 | 1 |
| AL050145 | 1 | 0 | 1 | 1 | 0 | 1 |
| AL050148 | 1 | 0 | 1 | 1 | 1 | 1 |
| AL050166 | 1 | 1 | 1 | 1 | 0 | 1 |
| AL050185 | 1 | 0 | 1 | 0 | 0 | 1 |
| AL050203 | 1 | 0 | 1 | 0 | 0 | 1 |
| AL050204 | 1 | 1 | 1 | 1 | 1 | 0 |

|          |   |   |   |   |   |   |
|----------|---|---|---|---|---|---|
| AL050205 | 1 | 0 | 1 | 0 | 0 | 0 |
| AL050297 | 1 | 1 | 1 | 1 | 0 | 1 |
| AL050367 | 1 | 1 | 1 | 1 | 0 | 0 |
| AL050385 | 1 | 0 | 1 | 0 | 1 | 0 |
| AL078636 | 1 | 0 | 1 | 0 | 0 | 1 |
| AL079277 | 1 | 1 | 1 | 1 | 1 | 1 |
| AL079294 | 1 | 0 | 1 | 0 | 0 | 1 |
| AL079314 | 1 | 0 | 1 | 0 | 1 | 0 |
| AL080057 | 1 | 0 | 1 | 0 | 0 | 0 |
| AL080062 | 1 | 1 | 1 | 1 | 0 | 0 |
| AL080065 | 1 | 0 | 1 | 1 | 0 | 1 |
| AL080073 | 1 | 0 | 1 | 0 | 1 | 1 |
| AL080075 | 0 | 0 | 1 | 0 | 0 | 0 |
| AL080078 | 1 | 0 | 1 | 0 | 1 | 0 |
| AL080082 | 1 | 1 | 1 | 1 | 1 | 1 |
| AL080086 | 1 | 1 | 1 | 1 | 0 | 0 |
| AL080093 | 1 | 0 | 1 | 0 | 0 | 0 |
| AL080095 | 1 | 0 | 1 | 1 | 1 | 1 |
| AL080114 | 1 | 0 | 1 | 1 | 0 | 1 |
| AL080118 | 1 | 0 | 1 | 0 | 0 | 0 |
| AL080120 | 1 | 1 | 1 | 1 | 0 | 0 |
| AL080134 | 1 | 1 | 1 | 1 | 0 | 1 |
| AL080176 | 1 | 0 | 1 | 0 | 0 | 0 |
| AL080180 | 1 | 1 | 1 | 1 | 1 | 0 |
| AL080182 | 1 | 1 | 1 | 1 | 1 | 1 |
| AL080192 | 1 | 1 | 1 | 1 | 0 | 1 |
| AL080208 | 1 | 0 | 1 | 0 | 1 | 1 |
| AL080209 | 1 | 0 | 1 | 1 | 0 | 1 |
| AL080213 | 1 | 0 | 1 | 1 | 1 | 0 |
| AL080215 | 0 | 0 | 0 | 0 | 0 | 1 |
| AL080216 | 1 | 0 | 1 | 0 | 0 | 0 |
| AL080218 | 1 | 1 | 1 | 1 | 1 | 1 |
| AL080221 | 1 | 0 | 1 | 1 | 1 | 1 |
| AL080232 | 1 | 1 | 1 | 1 | 0 | 1 |
| AL080234 | 1 | 0 | 1 | 0 | 1 | 1 |
| AL080280 | 1 | 1 | 1 | 1 | 0 | 1 |
| AL109678 | 0 | 0 | 0 | 0 | 0 | 1 |
| AL109695 | 1 | 0 | 1 | 1 | 1 | 1 |
| AL109696 | 0 | 0 | 0 | 0 | 0 | 1 |
| AL109699 | 1 | 0 | 1 | 1 | 1 | 0 |
| AL109700 | 1 | 1 | 0 | 0 | 0 | 0 |
| AL109705 | 1 | 0 | 1 | 0 | 1 | 1 |
| AL109706 | 1 | 0 | 1 | 0 | 1 | 1 |
| AL109710 | 1 | 1 | 1 | 1 | 1 | 1 |
| AL109716 | 1 | 0 | 1 | 0 | 0 | 0 |
| AL109729 | 1 | 1 | 1 | 1 | 0 | 0 |
| AL109781 | 0 | 0 | 1 | 0 | 0 | 0 |
| AL110126 | 1 | 0 | 1 | 0 | 0 | 0 |
| AL110139 | 1 | 0 | 1 | 0 | 0 | 1 |
| AL110141 | 1 | 1 | 1 | 1 | 0 | 0 |
| AL110150 | 1 | 0 | 1 | 0 | 0 | 0 |
| AL110152 | 1 | 1 | 1 | 1 | 0 | 1 |

|          |   |   |   |   |   |   |
|----------|---|---|---|---|---|---|
| AL110157 | 1 | 1 | 1 | 1 | 1 | 1 |
| AL110163 | 1 | 0 | 1 | 0 | 0 | 1 |
| AL110164 | 1 | 0 | 1 | 0 | 0 | 1 |
| AL110170 | 1 | 0 | 1 | 1 | 0 | 1 |
| AL110175 | 1 | 0 | 1 | 1 | 0 | 0 |
| AL110180 | 1 | 0 | 1 | 0 | 0 | 1 |
| AL110204 | 1 | 0 | 0 | 0 | 0 | 1 |
| AL110216 | 1 | 0 | 1 | 0 | 0 | 0 |
| AL110232 | 1 | 1 | 1 | 1 | 0 | 0 |
| AL110240 | 1 | 1 | 1 | 1 | 1 | 1 |
| AL110252 | 1 | 1 | 1 | 0 | 1 | 1 |
| AL117421 | 1 | 0 | 1 | 0 | 1 | 1 |
| AL117427 | 1 | 1 | 1 | 1 | 1 | 1 |
| AL117435 | 1 | 1 | 1 | 1 | 1 | 1 |
| AL117448 | 1 | 1 | 1 | 1 | 1 | 1 |
| AL117461 | 1 | 0 | 1 | 0 | 1 | 0 |
| AL117477 | 1 | 0 | 1 | 1 | 0 | 0 |
| AL117485 | 1 | 0 | 1 | 0 | 0 | 0 |
| AL117519 | 1 | 1 | 1 | 1 | 1 | 0 |
| AL117536 | 1 | 0 | 1 | 1 | 0 | 1 |
| AL117542 | 1 | 0 | 1 | 1 | 0 | 0 |
| AL117555 | 1 | 1 | 1 | 1 | 0 | 1 |
| AL117562 | 1 | 1 | 1 | 1 | 0 | 1 |
| AL117568 | 1 | 0 | 1 | 1 | 0 | 1 |
| AL117578 | 1 | 0 | 1 | 0 | 1 | 1 |
| AL117580 | 0 | 0 | 0 | 0 | 0 | 1 |
| AL117582 | 1 | 0 | 1 | 1 | 0 | 1 |
| AL117587 | 1 | 0 | 1 | 0 | 0 | 0 |
| AL117595 | 1 | 0 | 1 | 0 | 1 | 0 |
| AL117598 | 1 | 0 | 1 | 1 | 1 | 1 |
| AL117599 | 1 | 0 | 1 | 0 | 1 | 1 |
| AL117601 | 1 | 1 | 1 | 1 | 0 | 0 |
| AL117611 | 1 | 1 | 1 | 1 | 1 | 0 |
| AL117613 | 1 | 1 | 1 | 0 | 1 | 0 |
| AL117623 | 1 | 0 | 1 | 1 | 0 | 1 |
| AL117624 | 1 | 1 | 1 | 1 | 0 | 1 |
| AL117627 | 1 | 1 | 1 | 0 | 0 | 0 |
| AL117630 | 1 | 1 | 1 | 1 | 1 | 1 |
| AL117636 | 0 | 0 | 0 | 0 | 0 | 1 |
| AL117645 | 1 | 1 | 1 | 1 | 0 | 1 |
| AL117653 | 1 | 1 | 1 | 1 | 0 | 1 |
| AL117657 | 1 | 0 | 1 | 0 | 1 | 1 |
| AL117661 | 1 | 0 | 1 | 0 | 0 | 1 |
| AL117662 | 1 | 0 | 1 | 0 | 0 | 1 |
| AL122043 | 1 | 0 | 1 | 0 | 0 | 1 |
| AL122049 | 1 | 0 | 1 | 0 | 0 | 0 |
| AL122071 | 0 | 1 | 0 | 0 | 0 | 0 |
| AL122077 | 1 | 0 | 1 | 0 | 0 | 1 |
| AL122085 | 1 | 1 | 1 | 1 | 1 | 1 |
| AL122088 | 1 | 0 | 1 | 0 | 1 | 1 |
| AL122107 | 0 | 0 | 1 | 0 | 0 | 0 |
| AL122109 | 1 | 0 | 1 | 0 | 0 | 1 |

|          |   |   |   |   |   |   |
|----------|---|---|---|---|---|---|
| AL122120 | 1 | 0 | 1 | 0 | 0 | 0 |
| AL133022 | 0 | 0 | 0 | 0 | 0 | 1 |
| AL133026 | 1 | 0 | 1 | 0 | 0 | 0 |
| AL133031 | 1 | 0 | 1 | 0 | 0 | 0 |
| AL133033 | 1 | 0 | 1 | 1 | 0 | 1 |
| AL133047 | 1 | 1 | 1 | 1 | 1 | 0 |
| AL133089 | 1 | 0 | 1 | 0 | 0 | 1 |
| AL133090 | 1 | 1 | 1 | 0 | 1 | 1 |
| AL133101 | 1 | 1 | 1 | 1 | 1 | 0 |
| AL133104 | 1 | 1 | 1 | 1 | 1 | 0 |
| AL133108 | 1 | 1 | 1 | 1 | 0 | 1 |
| AL133117 | 1 | 1 | 1 | 1 | 0 | 1 |
| AL133569 | 1 | 0 | 1 | 0 | 0 | 0 |
| AL133577 | 1 | 0 | 1 | 0 | 1 | 1 |
| AL133585 | 1 | 0 | 1 | 1 | 0 | 0 |
| AL133591 | 1 | 1 | 1 | 0 | 0 | 1 |
| AL133599 | 1 | 0 | 1 | 0 | 0 | 0 |
| AL133611 | 1 | 0 | 1 | 0 | 1 | 0 |
| AL133622 | 1 | 1 | 1 | 1 | 0 | 1 |
| AL133633 | 1 | 0 | 1 | 0 | 0 | 1 |
| AL133641 | 1 | 1 | 1 | 1 | 1 | 1 |
| AL133662 | 1 | 0 | 1 | 1 | 0 | 1 |
| AL136629 | 1 | 0 | 1 | 0 | 0 | 0 |
| AL136762 | 1 | 1 | 1 | 1 | 1 | 1 |
| AL137257 | 1 | 0 | 1 | 0 | 1 | 1 |
| AL137259 | 0 | 0 | 1 | 0 | 0 | 0 |
| AL137294 | 1 | 0 | 1 | 1 | 0 | 0 |
| AL137310 | 1 | 1 | 1 | 1 | 0 | 1 |
| AL137315 | 1 | 0 | 1 | 0 | 0 | 0 |
| AL137331 | 1 | 0 | 1 | 0 | 0 | 1 |
| AL137332 | 1 | 0 | 1 | 1 | 0 | 0 |
| AL137333 | 1 | 0 | 1 | 1 | 1 | 1 |
| AL137334 | 1 | 0 | 1 | 0 | 1 | 1 |
| AL137342 | 1 | 0 | 1 | 0 | 0 | 1 |
| AL137346 | 1 | 0 | 1 | 1 | 1 | 1 |
| AL137347 | 1 | 0 | 1 | 0 | 1 | 1 |
| AL137349 | 1 | 0 | 1 | 0 | 0 | 0 |
| AL137356 | 1 | 0 | 1 | 1 | 0 | 0 |
| AL137364 | 1 | 0 | 1 | 0 | 0 | 1 |
| AL137372 | 1 | 0 | 1 | 1 | 1 | 1 |
| AL137383 | 1 | 0 | 1 | 0 | 1 | 1 |
| AL137385 | 1 | 0 | 1 | 0 | 0 | 1 |
| AL137389 | 0 | 0 | 0 | 0 | 0 | 1 |
| AL137398 | 1 | 0 | 1 | 0 | 1 | 0 |
| AL137403 | 1 | 0 | 1 | 1 | 0 | 1 |
| AL137406 | 1 | 1 | 1 | 1 | 1 | 1 |
| AL137411 | 1 | 0 | 1 | 0 | 0 | 0 |
| AL137414 | 1 | 1 | 1 | 1 | 1 | 0 |
| AL137416 | 1 | 0 | 1 | 0 | 0 | 0 |
| AL137425 | 1 | 0 | 0 | 0 | 0 | 1 |
| AL137426 | 1 | 1 | 1 | 1 | 1 | 1 |
| AL137430 | 1 | 1 | 1 | 0 | 0 | 1 |

|          |   |   |   |   |   |   |
|----------|---|---|---|---|---|---|
| AL137435 | 0 | 1 | 0 | 1 | 0 | 0 |
| AL137436 | 1 | 1 | 1 | 1 | 1 | 0 |
| AL137446 | 1 | 1 | 1 | 1 | 1 | 0 |
| AL137451 | 1 | 0 | 1 | 0 | 0 | 0 |
| AL137470 | 1 | 1 | 1 | 1 | 0 | 0 |
| AL137488 | 1 | 0 | 1 | 1 | 1 | 1 |
| AL137489 | 1 | 0 | 1 | 1 | 1 | 1 |
| AL137498 | 0 | 0 | 1 | 0 | 0 | 0 |
| AL137506 | 1 | 0 | 1 | 0 | 0 | 1 |
| AL137508 | 1 | 0 | 1 | 0 | 0 | 0 |
| AL137510 | 1 | 0 | 1 | 0 | 0 | 0 |
| AL137519 | 1 | 0 | 1 | 0 | 0 | 0 |
| AL137535 | 1 | 0 | 1 | 0 | 0 | 1 |
| AL137541 | 1 | 0 | 1 | 0 | 0 | 0 |
| AL137551 | 1 | 0 | 1 | 1 | 1 | 1 |
| AL137557 | 1 | 0 | 1 | 0 | 0 | 1 |
| AL137559 | 1 | 1 | 0 | 0 | 0 | 1 |
| AL137566 | 0 | 0 | 0 | 0 | 0 | 1 |
| AL137567 | 1 | 1 | 1 | 1 | 1 | 1 |
| AL137578 | 0 | 0 | 0 | 0 | 0 | 1 |
| AL137581 | 1 | 0 | 1 | 0 | 0 | 1 |
| AL137597 | 1 | 1 | 1 | 1 | 1 | 1 |
| AL137619 | 1 | 0 | 1 | 0 | 0 | 1 |
| AL137656 | 1 | 0 | 1 | 0 | 0 | 0 |
| AL137668 | 1 | 1 | 0 | 0 | 0 | 0 |
| AL137715 | 0 | 0 | 0 | 0 | 0 | 1 |
| AL137723 | 1 | 1 | 1 | 1 | 1 | 1 |
| AL137734 | 1 | 0 | 1 | 0 | 0 | 0 |
| AL137753 | 1 | 1 | 1 | 1 | 0 | 1 |
| AL137761 | 1 | 1 | 1 | 0 | 1 | 1 |
| AL157421 | 1 | 1 | 1 | 1 | 1 | 1 |
| AL157442 | 1 | 0 | 1 | 0 | 1 | 1 |
| AL157448 | 1 | 0 | 0 | 0 | 0 | 0 |
| AL157449 | 1 | 0 | 1 | 0 | 0 | 1 |
| AL157453 | 1 | 0 | 1 | 0 | 0 | 0 |
| AL157455 | 1 | 0 | 1 | 1 | 1 | 1 |
| AL157458 | 1 | 0 | 1 | 0 | 0 | 1 |
| AL157466 | 1 | 0 | 1 | 0 | 0 | 1 |
| AL157476 | 1 | 1 | 1 | 1 | 1 | 1 |
| AL157484 | 1 | 1 | 1 | 1 | 0 | 1 |
| AL157488 | 1 | 0 | 1 | 0 | 0 | 0 |
| AL157492 | 1 | 0 | 1 | 1 | 0 | 0 |
| AL157495 | 1 | 0 | 1 | 1 | 0 | 0 |
| AL157504 | 1 | 1 | 1 | 1 | 0 | 0 |
| AL157505 | 1 | 0 | 1 | 0 | 0 | 1 |
| AL157958 | 1 | 0 | 1 | 0 | 1 | 1 |
| AL161972 | 1 | 1 | 1 | 1 | 0 | 1 |
| AL161977 | 1 | 1 | 1 | 1 | 1 | 0 |
| AL161982 | 1 | 1 | 1 | 0 | 1 | 0 |
| AL162011 | 1 | 0 | 1 | 1 | 0 | 0 |
| AL162013 | 1 | 1 | 1 | 1 | 0 | 1 |
| AL162032 | 1 | 1 | 1 | 1 | 1 | 1 |



|          |   |   |   |   |   |   |
|----------|---|---|---|---|---|---|
| AL162042 | 1 | 0 | 1 | 0 | 0 | 1 |
| AL162054 | 1 | 0 | 1 | 0 | 0 | 0 |
| AL162073 | 1 | 1 | 1 | 1 | 0 | 0 |
| AL353944 | 1 | 1 | 1 | 0 | 1 | 1 |
| AL353954 | 1 | 0 | 1 | 1 | 1 | 1 |
| AL353957 | 1 | 0 | 1 | 0 | 0 | 0 |
| AL355708 | 1 | 0 | 1 | 0 | 0 | 0 |
| AL359055 | 1 | 1 | 1 | 1 | 0 | 0 |
| AL359211 | 1 | 1 | 1 | 1 | 1 | 1 |
| AL359558 | 1 | 0 | 1 | 0 | 0 | 1 |
| AL359568 | 1 | 1 | 1 | 0 | 0 | 0 |
| AL359582 | 1 | 1 | 1 | 1 | 1 | 1 |
| AL359585 | 1 | 1 | 1 | 1 | 1 | 1 |
| AL359605 | 1 | 0 | 1 | 0 | 0 | 0 |
| AL359622 | 1 | 1 | 1 | 1 | 0 | 0 |
| AL359938 | 1 | 1 | 1 | 1 | 1 | 1 |
| AL360201 | 1 | 1 | 1 | 1 | 0 | 1 |
| AL360204 | 0 | 0 | 0 | 1 | 0 | 0 |
| AL360257 | 0 | 0 | 0 | 0 | 0 | 1 |
| AL365404 | 1 | 0 | 1 | 1 | 0 | 0 |
| AL365410 | 1 | 0 | 1 | 0 | 0 | 1 |
| AL365511 | 1 | 0 | 1 | 0 | 1 | 1 |
| AL389942 | 1 | 0 | 1 | 1 | 1 | 1 |
| AL389956 | 1 | 1 | 1 | 1 | 0 | 0 |
| AL389983 | 1 | 1 | 1 | 1 | 0 | 1 |
| AL390078 | 1 | 0 | 1 | 0 | 0 | 1 |
| AL390079 | 1 | 1 | 1 | 1 | 0 | 0 |
| AL390084 | 1 | 0 | 0 | 0 | 0 | 0 |
| AL390143 | 1 | 1 | 1 | 1 | 0 | 1 |
| AL390153 | 1 | 1 | 1 | 1 | 1 | 1 |
| AL390158 | 1 | 0 | 1 | 0 | 0 | 0 |
| AL390159 | 1 | 0 | 1 | 0 | 0 | 0 |
| AL390175 | 1 | 0 | 1 | 1 | 1 | 0 |
| AL390176 | 1 | 1 | 1 | 1 | 0 | 0 |
| AL390184 | 1 | 1 | 1 | 1 | 0 | 1 |
| AL390216 | 1 | 0 | 1 | 0 | 0 | 1 |
| AL442094 | 1 | 0 | 1 | 0 | 0 | 1 |
| AL512686 | 1 | 1 | 0 | 0 | 0 | 1 |
| AL512695 | 1 | 0 | 1 | 0 | 0 | 0 |
| AL512701 | 1 | 0 | 1 | 0 | 1 | 1 |
| AL512721 | 1 | 0 | 1 | 0 | 1 | 1 |
| AL512723 | 1 | 0 | 1 | 1 | 0 | 0 |
| AL512725 | 1 | 0 | 1 | 1 | 1 | 0 |
| AL512727 | 1 | 0 | 0 | 0 | 0 | 0 |
| AL512758 | 1 | 1 | 1 | 1 | 1 | 0 |
| AL512765 | 1 | 1 | 1 | 1 | 1 | 1 |
| AL713630 | 0 | 0 | 0 | 1 | 0 | 0 |
| AL713674 | 1 | 1 | 1 | 1 | 1 | 0 |
| AL713702 | 1 | 1 | 1 | 1 | 1 | 1 |
| AL713704 | 1 | 0 | 1 | 0 | 0 | 0 |
| AL713721 | 1 | 1 | 1 | 1 | 0 | 0 |
| AL713738 | 1 | 1 | 1 | 1 | 1 | 1 |

|                |   |   |   |   |   |   |
|----------------|---|---|---|---|---|---|
| AL713744       | 1 | 0 | 1 | 0 | 0 | 0 |
| AL713756       | 1 | 0 | 1 | 1 | 1 | 1 |
| AW573085_RC    | 1 | 0 | 1 | 0 | 1 | 1 |
| AW673036_RC    | 1 | 1 | 1 | 1 | 1 | 1 |
| AY003830       | 1 | 0 | 1 | 0 | 0 | 1 |
| AY007149       | 1 | 0 | 1 | 0 | 0 | 0 |
| AY014272       | 1 | 1 | 1 | 1 | 1 | 1 |
| AY043141       | 1 | 0 | 1 | 0 | 0 | 1 |
| BC000572       | 1 | 1 | 1 | 1 | 0 | 0 |
| BC000596       | 1 | 0 | 1 | 1 | 1 | 1 |
| BC001437       | 1 | 0 | 1 | 0 | 1 | 1 |
| BC001648       | 1 | 1 | 1 | 1 | 0 | 1 |
| BC001742       | 1 | 0 | 1 | 0 | 0 | 0 |
| BC002770       | 1 | 0 | 1 | 0 | 0 | 0 |
| BC003122       | 1 | 0 | 1 | 0 | 0 | 1 |
| BC003515       | 1 | 0 | 1 | 0 | 1 | 1 |
| BC003629       | 1 | 0 | 1 | 1 | 0 | 1 |
| BC004544       | 1 | 1 | 1 | 1 | 0 | 1 |
| BC006136       | 1 | 0 | 1 | 0 | 1 | 1 |
| BC006384       | 1 | 1 | 1 | 1 | 1 | 1 |
| BC007381       | 1 | 1 | 1 | 1 | 1 | 0 |
| BC007384       | 1 | 0 | 1 | 0 | 0 | 0 |
| BC007436       | 1 | 1 | 1 | 1 | 0 | 1 |
| BC007586       | 1 | 1 | 0 | 0 | 0 | 0 |
| BC007652       | 1 | 0 | 1 | 0 | 0 | 0 |
| BC007663       | 1 | 0 | 1 | 1 | 1 | 0 |
| BC007901       | 1 | 1 | 1 | 1 | 0 | 0 |
| BC008632       | 1 | 0 | 0 | 0 | 0 | 0 |
| BC010117       | 1 | 0 | 1 | 0 | 0 | 1 |
| BC011630       | 1 | 1 | 1 | 1 | 1 | 1 |
| BC012029       | 1 | 1 | 1 | 1 | 1 | 0 |
| BC012203       | 0 | 0 | 1 | 0 | 0 | 0 |
| BC012486       | 1 | 1 | 1 | 1 | 0 | 0 |
| BC012882       | 1 | 0 | 1 | 0 | 0 | 0 |
| BC013767       | 1 | 0 | 1 | 0 | 0 | 1 |
| BC014011       | 1 | 1 | 1 | 0 | 1 | 1 |
| BC014148       | 1 | 0 | 1 | 0 | 0 | 0 |
| BC016683       | 1 | 1 | 1 | 1 | 1 | 1 |
| BC017488       | 1 | 1 | 1 | 1 | 0 | 1 |
| BC019022       | 1 | 0 | 1 | 0 | 0 | 0 |
| BC022317       | 1 | 0 | 1 | 1 | 1 | 1 |
| BC022889       | 1 | 0 | 1 | 0 | 0 | 1 |
| BC024006       | 1 | 0 | 1 | 0 | 0 | 0 |
| BE549953_RC    | 1 | 0 | 1 | 1 | 1 | 1 |
| Contig10004_RC | 1 | 0 | 1 | 0 | 0 | 1 |
| Contig10073_RC | 1 | 1 | 1 | 1 | 0 | 0 |
| Contig1007_RC  | 1 | 1 | 1 | 0 | 1 | 1 |
| Contig10115_RC | 1 | 0 | 1 | 0 | 0 | 0 |
| Contig10120_RC | 1 | 0 | 1 | 0 | 0 | 0 |
| Contig10137_RC | 1 | 1 | 1 | 1 | 1 | 1 |
| Contig10143_RC | 1 | 0 | 1 | 0 | 1 | 1 |
| Contig10154_RC | 1 | 0 | 1 | 1 | 1 | 0 |

|                |   |   |   |   |   |   |
|----------------|---|---|---|---|---|---|
| Contig1018_RC  | 1 | 0 | 1 | 0 | 0 | 0 |
| Contig1021_RC  | 1 | 0 | 1 | 0 | 0 | 0 |
| Contig1030_RC  | 1 | 1 | 1 | 1 | 1 | 1 |
| Contig1034_RC  | 1 | 1 | 1 | 1 | 1 | 1 |
| Contig10363_RC | 1 | 0 | 1 | 1 | 1 | 1 |
| Contig10387_RC | 1 | 0 | 1 | 0 | 0 | 1 |
| Contig1040_RC  | 1 | 1 | 1 | 1 | 0 | 1 |
| Contig10410_RC | 0 | 0 | 0 | 0 | 0 | 1 |
| Contig10434_RC | 1 | 0 | 1 | 0 | 1 | 1 |
| Contig10437_RC | 1 | 0 | 1 | 0 | 1 | 1 |
| Contig1061_RC  | 1 | 0 | 1 | 1 | 1 | 1 |
| Contig1063_RC  | 1 | 0 | 1 | 1 | 0 | 1 |
| Contig10670_RC | 1 | 1 | 1 | 1 | 1 | 1 |
| Contig10690_RC | 1 | 1 | 1 | 1 | 0 | 1 |
| Contig1080_RC  | 1 | 0 | 1 | 0 | 0 | 0 |
| Contig10843_RC | 0 | 0 | 1 | 0 | 0 | 0 |
| Contig10844_RC | 1 | 0 | 1 | 0 | 1 | 1 |
| Contig10935_RC | 1 | 1 | 1 | 1 | 0 | 0 |
| Contig10973_RC | 1 | 1 | 1 | 1 | 0 | 1 |
| Contig11012_RC | 1 | 0 | 1 | 0 | 1 | 1 |
| Contig11027_RC | 1 | 0 | 1 | 0 | 0 | 0 |
| Contig11032_RC | 1 | 1 | 1 | 1 | 1 | 0 |
| Contig11065_RC | 1 | 0 | 1 | 0 | 0 | 1 |
| Contig11075_RC | 0 | 0 | 1 | 0 | 0 | 0 |
| Contig11086_RC | 1 | 0 | 1 | 0 | 1 | 1 |
| Contig11093_RC | 1 | 1 | 1 | 1 | 0 | 1 |
| Contig11097_RC | 1 | 0 | 0 | 0 | 0 | 1 |
| Contig11106_RC | 1 | 1 | 0 | 0 | 0 | 1 |
| Contig1111_RC  | 1 | 1 | 1 | 1 | 1 | 0 |
| Contig11157_RC | 1 | 0 | 1 | 0 | 0 | 0 |
| Contig1115_RC  | 1 | 1 | 1 | 1 | 1 | 1 |
| Contig11178_RC | 1 | 0 | 1 | 0 | 0 | 0 |
| Contig111_RC   | 1 | 1 | 1 | 1 | 0 | 1 |
| Contig11274_RC | 1 | 0 | 1 | 0 | 0 | 1 |
| Contig1129_RC  | 1 | 0 | 1 | 0 | 0 | 0 |
| Contig11417_RC | 1 | 1 | 1 | 1 | 1 | 1 |
| Contig11518_RC | 1 | 0 | 1 | 0 | 0 | 1 |
| Contig11523_RC | 1 | 1 | 1 | 1 | 1 | 1 |
| Contig1152_RC  | 1 | 0 | 1 | 1 | 0 | 1 |
| Contig11940_RC | 1 | 0 | 0 | 0 | 0 | 0 |
| Contig12033_RC | 1 | 0 | 1 | 0 | 1 | 0 |
| Contig12140_RC | 1 | 0 | 1 | 0 | 0 | 1 |
| Contig12205_RC | 1 | 0 | 1 | 1 | 1 | 0 |
| Contig12216_RC | 1 | 1 | 1 | 0 | 1 | 1 |
| Contig12278_RC | 1 | 0 | 1 | 0 | 0 | 1 |
| Contig12294_RC | 1 | 0 | 1 | 0 | 1 | 1 |
| Contig12355_RC | 1 | 0 | 1 | 0 | 1 | 1 |
| Contig12356_RC | 1 | 1 | 1 | 0 | 0 | 0 |
| Contig12369_RC | 1 | 0 | 1 | 0 | 0 | 1 |
| Contig12402_RC | 1 | 1 | 1 | 1 | 0 | 1 |
| Contig1240_RC  | 1 | 1 | 1 | 1 | 0 | 1 |
| Contig12419_RC | 1 | 0 | 1 | 0 | 0 | 1 |

|                |   |   |   |   |   |   |
|----------------|---|---|---|---|---|---|
| Contig12432_RC | 1 | 0 | 1 | 0 | 0 | 0 |
| Contig12508_RC | 1 | 1 | 1 | 1 | 0 | 1 |
| Contig12525_RC | 1 | 0 | 0 | 0 | 0 | 0 |
| Contig12539_RC | 1 | 0 | 1 | 1 | 0 | 0 |
| Contig1254_RC  | 1 | 1 | 1 | 0 | 1 | 1 |
| Contig125_RC   | 1 | 1 | 1 | 1 | 0 | 1 |
| Contig12647_RC | 1 | 1 | 1 | 1 | 0 | 1 |
| Contig12648_RC | 1 | 1 | 1 | 1 | 1 | 1 |
| Contig12727_RC | 1 | 0 | 1 | 0 | 0 | 1 |
| Contig12742_RC | 1 | 1 | 1 | 0 | 0 | 1 |
| Contig12752_RC | 1 | 0 | 0 | 0 | 0 | 1 |
| Contig12755_RC | 1 | 0 | 1 | 0 | 0 | 1 |
| Contig12768_RC | 1 | 1 | 0 | 1 | 0 | 1 |
| Contig1277     | 1 | 1 | 1 | 1 | 0 | 1 |
| Contig12780_RC | 1 | 0 | 1 | 1 | 1 | 1 |
| Contig12803_RC | 1 | 0 | 1 | 0 | 1 | 1 |
| Contig12806_RC | 1 | 1 | 1 | 0 | 1 | 1 |
| Contig12814_RC | 1 | 0 | 1 | 0 | 0 | 1 |
| Contig12820_RC | 1 | 0 | 1 | 0 | 0 | 0 |
| Contig12864_RC | 1 | 1 | 1 | 0 | 1 | 1 |
| Contig1289_RC  | 1 | 1 | 1 | 1 | 1 | 0 |
| Contig13150_RC | 1 | 0 | 1 | 0 | 0 | 0 |
| Contig1315_RC  | 1 | 1 | 1 | 1 | 0 | 1 |
| Contig13173_RC | 1 | 0 | 1 | 0 | 0 | 1 |
| Contig1320_RC  | 1 | 0 | 1 | 1 | 1 | 1 |
| Contig13231    | 1 | 1 | 1 | 1 | 0 | 1 |
| Contig13282_RC | 1 | 0 | 1 | 0 | 0 | 1 |
| Contig13300_RC | 1 | 0 | 1 | 0 | 0 | 0 |
| Contig13458_RC | 1 | 0 | 1 | 0 | 0 | 0 |
| Contig13475_RC | 1 | 0 | 1 | 0 | 0 | 0 |
| Contig13480_RC | 1 | 0 | 1 | 0 | 0 | 1 |
| Contig13488_RC | 1 | 1 | 1 | 1 | 1 | 1 |
| Contig1351_RC  | 1 | 0 | 1 | 0 | 1 | 1 |
| Contig13551_RC | 1 | 1 | 1 | 1 | 0 | 0 |
| Contig13568_RC | 0 | 0 | 1 | 0 | 0 | 0 |
| Contig13609_RC | 1 | 0 | 1 | 0 | 0 | 0 |
| Contig13642_RC | 1 | 0 | 1 | 0 | 0 | 0 |
| Contig13643_RC | 1 | 0 | 1 | 1 | 0 | 1 |
| Contig13706_RC | 1 | 1 | 1 | 1 | 1 | 1 |
| Contig13745_RC | 1 | 0 | 1 | 0 | 0 | 0 |
| Contig13766_RC | 1 | 0 | 0 | 0 | 0 | 0 |
| Contig1376_RC  | 1 | 0 | 1 | 1 | 0 | 0 |
| Contig13813_RC | 1 | 0 | 1 | 0 | 0 | 0 |
| Contig13815_RC | 1 | 0 | 1 | 1 | 0 | 0 |
| Contig13822_RC | 1 | 0 | 1 | 1 | 1 | 1 |
| Contig13856_RC | 1 | 0 | 1 | 0 | 0 | 0 |
| Contig13862_RC | 1 | 1 | 1 | 1 | 1 | 1 |
| Contig13874_RC | 1 | 0 | 1 | 1 | 0 | 0 |
| Contig1389_RC  | 1 | 1 | 1 | 1 | 1 | 0 |
| Contig14015_RC | 1 | 0 | 1 | 0 | 0 | 0 |
| Contig14068_RC | 1 | 1 | 1 | 1 | 1 | 0 |
| Contig14115_RC | 1 | 1 | 1 | 1 | 0 | 1 |

|                |   |   |   |   |   |   |
|----------------|---|---|---|---|---|---|
| Contig14158    | 1 | 0 | 1 | 0 | 0 | 1 |
| Contig14166_RC | 0 | 0 | 1 | 1 | 0 | 0 |
| Contig14280_RC | 1 | 1 | 1 | 1 | 0 | 1 |
| Contig14335_RC | 1 | 0 | 1 | 0 | 0 | 0 |
| Contig14375_RC | 1 | 0 | 1 | 0 | 0 | 1 |
| Contig14385_RC | 0 | 0 | 0 | 0 | 0 | 1 |
| Contig14390_RC | 1 | 0 | 1 | 0 | 0 | 1 |
| Contig14398_RC | 1 | 1 | 1 | 1 | 1 | 1 |
| Contig14421_RC | 1 | 0 | 1 | 0 | 0 | 0 |
| Contig14433_RC | 1 | 1 | 1 | 1 | 0 | 1 |
| Contig14462_RC | 1 | 1 | 1 | 1 | 0 | 0 |
| Contig14468_RC | 1 | 0 | 1 | 0 | 0 | 1 |
| Contig14544_RC | 1 | 1 | 1 | 1 | 0 | 0 |
| Contig14555_RC | 0 | 0 | 1 | 1 | 0 | 0 |
| Contig14626_RC | 1 | 0 | 1 | 0 | 0 | 1 |
| Contig14632_RC | 0 | 0 | 1 | 0 | 0 | 0 |
| Contig14671_RC | 1 | 0 | 1 | 0 | 1 | 0 |
| Contig14710_RC | 1 | 0 | 1 | 1 | 0 | 0 |
| Contig14761_RC | 1 | 0 | 0 | 0 | 0 | 1 |
| Contig14796_RC | 1 | 1 | 1 | 1 | 0 | 0 |
| Contig14797_RC | 1 | 1 | 1 | 1 | 0 | 1 |
| Contig14810_RC | 1 | 0 | 1 | 1 | 1 | 0 |
| Contig14831_RC | 1 | 1 | 1 | 1 | 0 | 1 |
| Contig14945_RC | 1 | 0 | 1 | 0 | 0 | 0 |
| Contig14985_RC | 1 | 0 | 1 | 0 | 1 | 1 |
| Contig1501_RC  | 1 | 1 | 1 | 1 | 0 | 0 |
| Contig15026_RC | 1 | 0 | 0 | 0 | 0 | 0 |
| Contig15031_RC | 1 | 0 | 1 | 1 | 0 | 1 |
| Contig15114_RC | 1 | 0 | 1 | 0 | 0 | 0 |
| Contig15150_RC | 1 | 0 | 0 | 0 | 0 | 0 |
| Contig15163_RC | 1 | 0 | 1 | 0 | 0 | 0 |
| Contig15167_RC | 0 | 0 | 0 | 0 | 0 | 1 |
| Contig15169_RC | 1 | 1 | 1 | 0 | 1 | 1 |
| Contig15190_RC | 1 | 0 | 1 | 0 | 1 | 1 |
| Contig151_RC   | 1 | 0 | 1 | 1 | 0 | 1 |
| Contig15216_RC | 1 | 0 | 1 | 0 | 0 | 1 |
| Contig15268_RC | 1 | 1 | 1 | 1 | 1 | 1 |
| Contig15283_RC | 1 | 0 | 1 | 0 | 0 | 0 |
| Contig15329_RC | 0 | 0 | 0 | 0 | 0 | 1 |
| Contig15337_RC | 1 | 0 | 1 | 0 | 0 | 1 |
| Contig15381_RC | 1 | 0 | 1 | 1 | 0 | 1 |
| Contig15441_RC | 1 | 0 | 0 | 0 | 0 | 1 |
| Contig15452_RC | 1 | 1 | 1 | 1 | 0 | 1 |
| Contig15463_RC | 1 | 1 | 1 | 1 | 0 | 0 |
| Contig15466_RC | 1 | 0 | 1 | 1 | 0 | 0 |
| Contig15529_RC | 1 | 0 | 1 | 0 | 0 | 0 |
| Contig15550_RC | 1 | 1 | 1 | 1 | 0 | 0 |
| Contig15566_RC | 1 | 0 | 1 | 1 | 1 | 1 |
| Contig15577_RC | 1 | 0 | 1 | 0 | 0 | 0 |
| Contig15607_RC | 1 | 1 | 0 | 0 | 0 | 1 |
| Contig15612_RC | 1 | 0 | 1 | 0 | 0 | 1 |
| Contig15635_RC | 1 | 1 | 1 | 1 | 1 | 1 |

|                |   |   |   |   |   |   |
|----------------|---|---|---|---|---|---|
| Contig15639_RC | 1 | 0 | 1 | 0 | 0 | 0 |
| Contig15644_RC | 1 | 1 | 1 | 1 | 0 | 0 |
| Contig15693_RC | 1 | 0 | 1 | 1 | 1 | 1 |
| Contig15746_RC | 1 | 0 | 0 | 0 | 0 | 1 |
| Contig15795_RC | 1 | 0 | 0 | 0 | 0 | 1 |
| Contig15833_RC | 0 | 0 | 1 | 0 | 0 | 0 |
| Contig15857_RC | 0 | 0 | 0 | 0 | 0 | 1 |
| Contig15898_RC | 1 | 1 | 1 | 1 | 0 | 1 |
| Contig15935_RC | 1 | 0 | 1 | 0 | 0 | 0 |
| Contig15943_RC | 1 | 0 | 1 | 1 | 0 | 0 |
| Contig15972_RC | 1 | 1 | 1 | 1 | 0 | 0 |
| Contig16043_RC | 1 | 1 | 1 | 1 | 0 | 1 |
| Contig16161_RC | 0 | 0 | 0 | 0 | 0 | 1 |
| Contig1617     | 1 | 0 | 1 | 0 | 0 | 0 |
| Contig16192_RC | 1 | 0 | 1 | 1 | 1 | 1 |
| Contig16195_RC | 1 | 0 | 0 | 0 | 0 | 0 |
| Contig16208_RC | 1 | 1 | 1 | 1 | 0 | 0 |
| Contig16217_RC | 1 | 0 | 1 | 1 | 0 | 0 |
| Contig16239_RC | 0 | 1 | 1 | 0 | 0 | 0 |
| Contig16253_RC | 1 | 0 | 1 | 0 | 1 | 1 |
| Contig16261_RC | 1 | 0 | 0 | 0 | 0 | 0 |
| Contig16262_RC | 1 | 0 | 1 | 1 | 1 | 1 |
| Contig16266_RC | 1 | 0 | 1 | 0 | 0 | 1 |
| Contig16326_RC | 1 | 0 | 1 | 1 | 0 | 1 |
| Contig16329_RC | 1 | 0 | 1 | 1 | 1 | 1 |
| Contig16330_RC | 0 | 0 | 0 | 1 | 0 | 0 |
| Contig16346_RC | 1 | 0 | 0 | 1 | 0 | 0 |
| Contig16366_RC | 1 | 0 | 0 | 0 | 0 | 0 |
| Contig16422_RC | 0 | 0 | 0 | 0 | 0 | 1 |
| Contig16453_RC | 1 | 0 | 1 | 0 | 0 | 0 |
| Contig16476_RC | 1 | 0 | 1 | 0 | 0 | 0 |
| Contig16481_RC | 1 | 0 | 1 | 0 | 0 | 0 |
| Contig16494_RC | 0 | 1 | 0 | 0 | 0 | 1 |
| Contig16530_RC | 1 | 0 | 1 | 0 | 0 | 0 |
| Contig16540_RC | 0 | 0 | 1 | 0 | 0 | 0 |
| Contig16596_RC | 1 | 0 | 1 | 0 | 0 | 0 |
| Contig16654_RC | 1 | 0 | 1 | 1 | 1 | 0 |
| Contig1667_RC  | 1 | 1 | 1 | 1 | 0 | 1 |
| Contig16694_RC | 1 | 0 | 1 | 0 | 0 | 1 |
| Contig16712_RC | 1 | 1 | 1 | 1 | 0 | 0 |
| Contig16740_RC | 1 | 0 | 1 | 0 | 0 | 0 |
| Contig16750_RC | 1 | 0 | 1 | 0 | 1 | 1 |
| Contig16770_RC | 1 | 0 | 1 | 0 | 0 | 1 |
| Contig16781_RC | 1 | 0 | 1 | 1 | 1 | 1 |
| Contig16786_RC | 1 | 1 | 1 | 1 | 0 | 1 |
| Contig1682_RC  | 1 | 1 | 1 | 1 | 0 | 1 |
| Contig16836_RC | 0 | 0 | 0 | 0 | 0 | 1 |
| Contig16881_RC | 0 | 0 | 0 | 0 | 0 | 1 |
| Contig16892_RC | 1 | 0 | 0 | 0 | 0 | 0 |
| Contig16895_RC | 1 | 0 | 1 | 1 | 1 | 1 |
| Contig16902_RC | 1 | 1 | 1 | 1 | 1 | 1 |
| Contig17008_RC | 0 | 0 | 0 | 0 | 0 | 1 |

|                |   |   |   |   |   |   |
|----------------|---|---|---|---|---|---|
| Contig17027_RC | 1 | 0 | 0 | 0 | 0 | 1 |
| Contig17030_RC | 1 | 1 | 1 | 0 | 0 | 1 |
| Contig17109_RC | 1 | 1 | 1 | 1 | 1 | 1 |
| Contig17119_RC | 1 | 0 | 1 | 0 | 0 | 1 |
| Contig17195_RC | 1 | 0 | 1 | 0 | 1 | 1 |
| Contig17288_RC | 1 | 0 | 1 | 0 | 0 | 1 |
| Contig17327_RC | 1 | 1 | 1 | 1 | 0 | 0 |
| Contig17333_RC | 0 | 0 | 1 | 0 | 0 | 0 |
| Contig17350_RC | 1 | 0 | 1 | 0 | 0 | 1 |
| Contig17475_RC | 1 | 1 | 1 | 1 | 1 | 1 |
| Contig17490_RC | 1 | 0 | 1 | 0 | 1 | 1 |
| Contig17567_RC | 1 | 1 | 1 | 1 | 0 | 1 |
| Contig17607_RC | 1 | 0 | 1 | 1 | 0 | 0 |
| Contig176_RC   | 1 | 1 | 1 | 1 | 0 | 1 |
| Contig1778_RC  | 1 | 0 | 1 | 1 | 1 | 0 |
| Contig178_RC   | 1 | 1 | 1 | 1 | 0 | 1 |
| Contig1815_RC  | 1 | 0 | 1 | 1 | 1 | 1 |
| Contig18246_RC | 1 | 0 | 1 | 1 | 0 | 1 |
| Contig1828_RC  | 0 | 0 | 0 | 0 | 1 | 1 |
| Contig1829     | 1 | 1 | 1 | 1 | 1 | 0 |
| Contig18326_RC | 1 | 1 | 1 | 1 | 0 | 1 |
| Contig18373_RC | 1 | 1 | 0 | 0 | 0 | 1 |
| Contig18380_RC | 1 | 0 | 1 | 1 | 0 | 1 |
| Contig18456_RC | 1 | 0 | 1 | 1 | 0 | 1 |
| Contig18476_RC | 1 | 0 | 1 | 0 | 1 | 1 |
| Contig18481_RC | 1 | 1 | 1 | 1 | 0 | 1 |
| Contig18493_RC | 1 | 0 | 1 | 0 | 0 | 1 |
| Contig18494_RC | 1 | 0 | 1 | 0 | 1 | 1 |
| Contig18780_RC | 1 | 0 | 1 | 1 | 1 | 1 |
| Contig18826_RC | 1 | 0 | 1 | 0 | 1 | 0 |
| Contig18911_RC | 1 | 1 | 1 | 1 | 0 | 0 |
| Contig18967_RC | 1 | 1 | 1 | 1 | 1 | 1 |
| Contig19019_RC | 0 | 0 | 1 | 0 | 0 | 1 |
| Contig19023_RC | 1 | 1 | 1 | 1 | 0 | 1 |
| Contig19194_RC | 1 | 1 | 1 | 0 | 1 | 1 |
| Contig19205_RC | 1 | 1 | 1 | 1 | 1 | 1 |
| Contig19210_RC | 1 | 0 | 1 | 0 | 0 | 0 |
| Contig19213_RC | 1 | 0 | 1 | 0 | 0 | 1 |
| Contig19216_RC | 1 | 0 | 0 | 0 | 0 | 1 |
| Contig19224_RC | 1 | 0 | 1 | 1 | 1 | 1 |
| Contig1924_RC  | 1 | 0 | 1 | 1 | 1 | 0 |
| Contig19324_RC | 1 | 0 | 1 | 0 | 1 | 1 |
| Contig19340_RC | 1 | 0 | 1 | 1 | 0 | 0 |
| Contig19384_RC | 1 | 0 | 1 | 0 | 0 | 1 |
| Contig19431_RC | 1 | 0 | 1 | 1 | 1 | 1 |
| Contig19440_RC | 1 | 0 | 1 | 0 | 0 | 1 |
| Contig19451_RC | 1 | 0 | 1 | 0 | 0 | 0 |
| Contig19530_RC | 1 | 1 | 1 | 0 | 0 | 1 |
| Contig19635_RC | 1 | 0 | 1 | 0 | 0 | 1 |
| Contig19662_RC | 1 | 0 | 1 | 1 | 0 | 0 |
| Contig1970_RC  | 1 | 1 | 1 | 1 | 0 | 1 |
| Contig19715_RC | 1 | 0 | 1 | 0 | 0 | 1 |

|                |   |   |   |   |   |   |
|----------------|---|---|---|---|---|---|
| Contig19733_RC | 1 | 1 | 1 | 1 | 0 | 1 |
| Contig19822_RC | 1 | 0 | 1 | 0 | 0 | 1 |
| Contig19834_RC | 1 | 1 | 1 | 1 | 0 | 0 |
| Contig19918_RC | 1 | 1 | 1 | 0 | 0 | 1 |
| Contig19956_RC | 1 | 0 | 1 | 0 | 0 | 1 |
| Contig19982_RC | 1 | 1 | 1 | 1 | 0 | 0 |
| Contig1998_RC  | 1 | 0 | 1 | 0 | 1 | 1 |
| Contig19999_RC | 1 | 0 | 1 | 0 | 0 | 1 |
| Contig2010_RC  | 1 | 0 | 1 | 1 | 0 | 1 |
| Contig20156_RC | 1 | 0 | 1 | 0 | 0 | 1 |
| Contig20184_RC | 1 | 0 | 1 | 0 | 0 | 1 |
| Contig20269_RC | 1 | 1 | 1 | 1 | 0 | 1 |
| Contig20302_RC | 1 | 0 | 1 | 0 | 0 | 1 |
| Contig20343_RC | 1 | 0 | 1 | 1 | 0 | 1 |
| Contig20355_RC | 1 | 0 | 1 | 0 | 0 | 0 |
| Contig20361_RC | 1 | 0 | 1 | 0 | 0 | 0 |
| Contig20391_RC | 1 | 1 | 1 | 1 | 0 | 0 |
| Contig20428_RC | 1 | 0 | 1 | 1 | 1 | 1 |
| Contig20441_RC | 1 | 0 | 1 | 0 | 1 | 1 |
| Contig20550_RC | 1 | 0 | 1 | 1 | 1 | 1 |
| Contig20568_RC | 1 | 0 | 1 | 0 | 1 | 1 |
| Contig20598_RC | 1 | 0 | 1 | 1 | 0 | 0 |
| Contig20600_RC | 1 | 0 | 1 | 0 | 0 | 1 |
| Contig20629_RC | 1 | 1 | 1 | 0 | 1 | 1 |
| Contig20669_RC | 0 | 0 | 0 | 0 | 0 | 1 |
| Contig20708_RC | 1 | 0 | 1 | 0 | 0 | 1 |
| Contig20729_RC | 1 | 0 | 1 | 0 | 0 | 1 |
| Contig20748_RC | 1 | 0 | 1 | 0 | 1 | 1 |
| Contig20755    | 1 | 1 | 1 | 1 | 1 | 1 |
| Contig20793_RC | 0 | 0 | 0 | 1 | 0 | 0 |
| Contig20796_RC | 1 | 0 | 1 | 0 | 0 | 1 |
| Contig20799_RC | 1 | 0 | 1 | 0 | 0 | 0 |
| Contig20807_RC | 1 | 1 | 1 | 1 | 1 | 1 |
| Contig20839_RC | 0 | 0 | 1 | 0 | 0 | 0 |
| Contig20846_RC | 1 | 0 | 1 | 0 | 0 | 1 |
| Contig20901_RC | 1 | 1 | 1 | 1 | 0 | 1 |
| Contig20907_RC | 0 | 0 | 1 | 0 | 0 | 0 |
| Contig20908_RC | 1 | 0 | 1 | 1 | 0 | 1 |
| Contig20914_RC | 1 | 0 | 1 | 0 | 0 | 1 |
| Contig20953_RC | 1 | 1 | 1 | 1 | 0 | 1 |
| Contig20989    | 1 | 0 | 1 | 0 | 0 | 0 |
| Contig2099_RC  | 1 | 1 | 1 | 1 | 1 | 1 |
| Contig21039_RC | 1 | 0 | 1 | 0 | 0 | 0 |
| Contig21063_RC | 1 | 0 | 0 | 0 | 0 | 0 |
| Contig21100_RC | 1 | 0 | 1 | 0 | 0 | 1 |
| Contig21130_RC | 1 | 0 | 1 | 0 | 1 | 0 |
| Contig21177_RC | 1 | 1 | 1 | 0 | 0 | 1 |
| Contig21185_RC | 1 | 0 | 1 | 1 | 0 | 1 |
| Contig21192    | 1 | 0 | 1 | 1 | 0 | 1 |
| Contig21268_RC | 1 | 1 | 1 | 1 | 1 | 0 |
| Contig21271_RC | 0 | 1 | 0 | 0 | 0 | 0 |
| Contig21319_RC | 1 | 0 | 1 | 0 | 1 | 1 |



|                |   |   |   |   |   |   |
|----------------|---|---|---|---|---|---|
| Contig21353_RC | 1 | 0 | 0 | 1 | 0 | 0 |
| Contig21370_RC | 1 | 1 | 1 | 1 | 0 | 1 |
| Contig21391_RC | 1 | 0 | 1 | 0 | 0 | 0 |
| Contig21406_RC | 0 | 1 | 0 | 0 | 0 | 1 |
| Contig21421_RC | 1 | 0 | 1 | 0 | 0 | 1 |
| Contig21434_RC | 1 | 1 | 1 | 1 | 0 | 0 |
| Contig21464_RC | 1 | 0 | 1 | 0 | 0 | 0 |
| Contig21465_RC | 1 | 0 | 1 | 0 | 0 | 1 |
| Contig21478_RC | 0 | 0 | 0 | 0 | 0 | 1 |
| Contig21514_RC | 1 | 1 | 1 | 1 | 0 | 0 |
| Contig21607_RC | 1 | 0 | 1 | 0 | 0 | 1 |
| Contig21619_RC | 1 | 1 | 0 | 0 | 0 | 0 |
| Contig21627_RC | 1 | 0 | 1 | 0 | 0 | 0 |
| Contig21678_RC | 1 | 1 | 1 | 1 | 0 | 0 |
| Contig21679_RC | 0 | 1 | 0 | 0 | 0 | 0 |
| Contig21742_RC | 1 | 0 | 1 | 0 | 1 | 0 |
| Contig21787_RC | 1 | 0 | 1 | 0 | 0 | 1 |
| Contig21797_RC | 0 | 0 | 0 | 0 | 0 | 1 |
| Contig21843_RC | 1 | 0 | 1 | 1 | 0 | 1 |
| Contig21852_RC | 1 | 1 | 1 | 1 | 1 | 1 |
| Contig21869_RC | 1 | 1 | 1 | 0 | 0 | 0 |
| Contig21904    | 1 | 0 | 1 | 0 | 1 | 1 |
| Contig21929_RC | 1 | 1 | 1 | 1 | 0 | 0 |
| Contig21947_RC | 1 | 0 | 1 | 0 | 0 | 1 |
| Contig21988_RC | 1 | 0 | 1 | 1 | 1 | 1 |
| Contig21997_RC | 1 | 1 | 1 | 1 | 0 | 1 |
| Contig22022_RC | 1 | 0 | 1 | 0 | 0 | 1 |
| Contig22095_RC | 1 | 0 | 0 | 0 | 0 | 1 |
| Contig22102_RC | 1 | 0 | 1 | 0 | 0 | 0 |
| Contig22179_RC | 1 | 0 | 1 | 0 | 0 | 1 |
| Contig22194_RC | 1 | 1 | 1 | 1 | 0 | 0 |
| Contig22251_RC | 1 | 1 | 1 | 1 | 1 | 0 |
| Contig22418_RC | 1 | 1 | 1 | 1 | 1 | 0 |
| Contig22427_RC | 1 | 0 | 1 | 1 | 1 | 1 |
| Contig22454_RC | 1 | 0 | 1 | 0 | 0 | 1 |
| Contig22517_RC | 1 | 1 | 1 | 1 | 0 | 1 |
| Contig22526_RC | 1 | 1 | 1 | 0 | 0 | 1 |
| Contig22534_RC | 1 | 1 | 1 | 1 | 0 | 0 |
| Contig22551_RC | 1 | 0 | 1 | 0 | 0 | 1 |
| Contig22599_RC | 1 | 1 | 1 | 0 | 0 | 1 |
| Contig2262_RC  | 1 | 0 | 1 | 0 | 0 | 1 |
| Contig2263_RC  | 1 | 0 | 1 | 1 | 1 | 1 |
| Contig22645_RC | 1 | 0 | 1 | 0 | 0 | 1 |
| Contig22705_RC | 1 | 1 | 1 | 1 | 0 | 0 |
| Contig22714_RC | 1 | 1 | 1 | 1 | 0 | 1 |
| Contig22749    | 1 | 0 | 1 | 1 | 0 | 0 |
| Contig22758_RC | 1 | 0 | 1 | 1 | 0 | 1 |
| Contig22775_RC | 1 | 1 | 1 | 1 | 1 | 1 |
| Contig22818_RC | 0 | 0 | 0 | 0 | 0 | 1 |
| Contig22844_RC | 1 | 1 | 1 | 1 | 1 | 1 |
| Contig22927_RC | 1 | 0 | 1 | 0 | 0 | 0 |
| Contig22995_RC | 1 | 0 | 1 | 0 | 0 | 0 |

|                |   |   |   |   |   |   |
|----------------|---|---|---|---|---|---|
| Contig23046_RC | 1 | 1 | 1 | 1 | 0 | 1 |
| Contig23074_RC | 1 | 1 | 1 | 1 | 0 | 0 |
| Contig23080_RC | 1 | 1 | 1 | 0 | 1 | 1 |
| Contig23085_RC | 1 | 1 | 1 | 1 | 1 | 1 |
| Contig23165_RC | 1 | 0 | 1 | 0 | 0 | 0 |
| Contig23198_RC | 1 | 0 | 1 | 0 | 0 | 1 |
| Contig23240_RC | 1 | 0 | 1 | 1 | 1 | 1 |
| Contig23280    | 1 | 0 | 1 | 0 | 1 | 1 |
| Contig23338_RC | 1 | 0 | 1 | 0 | 0 | 1 |
| Contig23352_RC | 1 | 0 | 1 | 1 | 1 | 1 |
| Contig23386_RC | 1 | 1 | 1 | 0 | 0 | 1 |
| Contig2339_RC  | 1 | 1 | 1 | 1 | 1 | 0 |
| Contig23404_RC | 1 | 1 | 1 | 1 | 1 | 1 |
| Contig23408_RC | 1 | 1 | 1 | 1 | 0 | 0 |
| Contig23417_RC | 1 | 0 | 1 | 1 | 0 | 0 |
| Contig23421_RC | 1 | 1 | 1 | 1 | 0 | 0 |
| Contig23423_RC | 1 | 0 | 1 | 0 | 0 | 1 |
| Contig23431_RC | 1 | 0 | 1 | 0 | 1 | 1 |
| Contig23454_RC | 1 | 0 | 0 | 0 | 0 | 1 |
| Contig23475_RC | 0 | 0 | 0 | 0 | 0 | 1 |
| Contig23491_RC | 1 | 1 | 1 | 1 | 0 | 1 |
| Contig23513_RC | 1 | 0 | 1 | 0 | 0 | 0 |
| Contig23523_RC | 1 | 1 | 1 | 1 | 1 | 0 |
| Contig23581_RC | 1 | 0 | 1 | 0 | 1 | 1 |
| Contig23593_RC | 1 | 1 | 1 | 1 | 0 | 1 |
| Contig23667_RC | 1 | 0 | 1 | 0 | 0 | 1 |
| Contig23703_RC | 1 | 1 | 1 | 0 | 0 | 0 |
| Contig23742_RC | 1 | 0 | 1 | 1 | 0 | 0 |
| Contig23761_RC | 1 | 0 | 1 | 0 | 0 | 1 |
| Contig23803_RC | 1 | 0 | 1 | 0 | 0 | 1 |
| Contig23806_RC | 1 | 0 | 1 | 0 | 1 | 1 |
| Contig23809_RC | 0 | 1 | 0 | 0 | 0 | 1 |
| Contig23822_RC | 0 | 0 | 0 | 0 | 0 | 1 |
| Contig23837_RC | 0 | 0 | 1 | 0 | 0 | 0 |
| Contig23842_RC | 1 | 0 | 1 | 0 | 0 | 1 |
| Contig23859_RC | 1 | 1 | 1 | 1 | 0 | 1 |
| Contig23881_RC | 1 | 0 | 1 | 1 | 1 | 1 |
| Contig23913_RC | 1 | 1 | 0 | 1 | 0 | 1 |
| Contig23931_RC | 1 | 0 | 1 | 0 | 1 | 1 |
| Contig23975_RC | 1 | 0 | 1 | 0 | 0 | 0 |
| Contig23977_RC | 0 | 0 | 1 | 0 | 0 | 0 |
| Contig23991_RC | 1 | 1 | 1 | 1 | 0 | 1 |
| Contig2399_RC  | 1 | 0 | 1 | 1 | 1 | 1 |
| Contig24026_RC | 1 | 0 | 1 | 1 | 0 | 0 |
| Contig24049_RC | 0 | 0 | 1 | 0 | 0 | 0 |
| Contig24066_RC | 1 | 1 | 1 | 1 | 0 | 0 |
| Contig24094_RC | 1 | 0 | 1 | 0 | 0 | 1 |
| Contig24098_RC | 1 | 0 | 1 | 1 | 1 | 1 |
| Contig24161_RC | 1 | 0 | 1 | 0 | 0 | 1 |
| Contig24196_RC | 1 | 0 | 1 | 0 | 0 | 0 |
| Contig24204_RC | 1 | 0 | 1 | 1 | 0 | 1 |
| Contig24252_RC | 1 | 0 | 1 | 0 | 1 | 0 |

|                |   |   |   |   |   |   |
|----------------|---|---|---|---|---|---|
| Contig24259_RC | 1 | 0 | 1 | 1 | 0 | 1 |
| Contig24308_RC | 1 | 0 | 1 | 0 | 1 | 0 |
| Contig24344_RC | 1 | 0 | 0 | 0 | 0 | 1 |
| Contig24376_RC | 1 | 1 | 0 | 0 | 0 | 0 |
| Contig2439_RC  | 1 | 0 | 1 | 0 | 0 | 0 |
| Contig24417_RC | 1 | 0 | 1 | 1 | 0 | 1 |
| Contig24594_RC | 0 | 0 | 0 | 0 | 0 | 1 |
| Contig24599_RC | 0 | 0 | 0 | 0 | 0 | 1 |
| Contig24600_RC | 1 | 0 | 1 | 0 | 0 | 1 |
| Contig24602_RC | 1 | 1 | 1 | 1 | 0 | 1 |
| Contig24609_RC | 1 | 1 | 1 | 1 | 1 | 1 |
| Contig24644_RC | 1 | 0 | 1 | 0 | 0 | 1 |
| Contig24646_RC | 1 | 1 | 1 | 1 | 0 | 1 |
| Contig24789_RC | 1 | 0 | 1 | 0 | 0 | 0 |
| Contig24811_RC | 1 | 0 | 1 | 1 | 1 | 0 |
| Contig24818_RC | 1 | 0 | 1 | 0 | 0 | 0 |
| Contig24843_RC | 1 | 0 | 1 | 0 | 0 | 1 |
| Contig24875_RC | 1 | 0 | 1 | 0 | 0 | 0 |
| Contig24903_RC | 1 | 0 | 1 | 0 | 1 | 0 |
| Contig24986    | 1 | 1 | 1 | 1 | 0 | 0 |
| Contig25041_RC | 1 | 0 | 1 | 0 | 0 | 1 |
| Contig25060_RC | 1 | 1 | 1 | 1 | 0 | 1 |
| Contig25062_RC | 1 | 0 | 1 | 0 | 0 | 1 |
| Contig25075_RC | 1 | 1 | 1 | 1 | 0 | 0 |
| Contig25095_RC | 1 | 0 | 1 | 0 | 0 | 1 |
| Contig25119    | 1 | 1 | 1 | 0 | 0 | 1 |
| Contig2512_RC  | 1 | 1 | 1 | 1 | 0 | 0 |
| Contig25131_RC | 1 | 0 | 1 | 0 | 0 | 0 |
| Contig25138_RC | 1 | 1 | 1 | 0 | 0 | 1 |
| Contig25142_RC | 1 | 1 | 1 | 1 | 1 | 1 |
| Contig25194_RC | 0 | 0 | 1 | 0 | 0 | 0 |
| Contig25198_RC | 1 | 0 | 1 | 1 | 1 | 1 |
| Contig25228_RC | 1 | 0 | 1 | 0 | 0 | 1 |
| Contig25234_RC | 1 | 0 | 1 | 0 | 0 | 1 |
| Contig25256_RC | 1 | 0 | 1 | 0 | 0 | 1 |
| Contig25319_RC | 1 | 0 | 1 | 0 | 0 | 1 |
| Contig25327_RC | 1 | 0 | 1 | 0 | 0 | 0 |
| Contig25356_RC | 1 | 0 | 1 | 0 | 0 | 1 |
| Contig25362_RC | 1 | 1 | 1 | 1 | 0 | 1 |
| Contig25429_RC | 1 | 1 | 1 | 1 | 0 | 0 |
| Contig25503_RC | 1 | 1 | 0 | 1 | 0 | 0 |
| Contig25541_RC | 1 | 0 | 1 | 1 | 1 | 1 |
| Contig25583_RC | 1 | 0 | 1 | 1 | 1 | 1 |
| Contig25595_RC | 1 | 0 | 1 | 0 | 1 | 1 |
| Contig25597_RC | 1 | 0 | 1 | 0 | 1 | 1 |
| Contig25617_RC | 1 | 0 | 1 | 0 | 0 | 1 |
| Contig25619_RC | 1 | 0 | 1 | 0 | 0 | 1 |
| Contig25622_RC | 1 | 1 | 1 | 1 | 0 | 1 |
| Contig25653_RC | 1 | 1 | 1 | 0 | 0 | 0 |
| Contig25659_RC | 1 | 1 | 1 | 1 | 0 | 1 |
| Contig25670_RC | 1 | 1 | 1 | 1 | 1 | 0 |
| Contig25700_RC | 1 | 1 | 1 | 1 | 0 | 1 |

|                |   |   |   |   |   |   |
|----------------|---|---|---|---|---|---|
| Contig25703_RC | 1 | 0 | 1 | 0 | 0 | 1 |
| Contig25707_RC | 1 | 0 | 1 | 1 | 0 | 1 |
| Contig25717_RC | 1 | 0 | 1 | 1 | 0 | 1 |
| Contig25728_RC | 1 | 0 | 1 | 1 | 0 | 1 |
| Contig25744_RC | 1 | 1 | 1 | 1 | 0 | 0 |
| Contig25765_RC | 0 | 0 | 0 | 0 | 0 | 1 |
| Contig25794_RC | 1 | 1 | 1 | 1 | 0 | 0 |
| Contig25800_RC | 1 | 1 | 1 | 1 | 0 | 0 |
| Contig25809_RC | 1 | 1 | 1 | 1 | 1 | 1 |
| Contig25814_RC | 1 | 0 | 1 | 0 | 0 | 1 |
| Contig25819_RC | 1 | 0 | 0 | 0 | 0 | 0 |
| Contig25881_RC | 1 | 0 | 0 | 0 | 0 | 1 |
| Contig25938_RC | 1 | 0 | 0 | 0 | 0 | 0 |
| Contig25944_RC | 1 | 1 | 1 | 0 | 0 | 1 |
| Contig25949_RC | 1 | 0 | 1 | 0 | 1 | 0 |
| Contig25969_RC | 0 | 0 | 1 | 0 | 0 | 0 |
| Contig25972_RC | 1 | 0 | 0 | 0 | 0 | 0 |
| Contig25978_RC | 1 | 1 | 1 | 1 | 1 | 1 |
| Contig25994_RC | 0 | 0 | 1 | 0 | 0 | 0 |
| Contig26019_RC | 1 | 1 | 1 | 1 | 1 | 1 |
| Contig26027_RC | 1 | 0 | 1 | 0 | 0 | 1 |
| Contig26059_RC | 1 | 0 | 1 | 0 | 0 | 0 |
| Contig26077_RC | 1 | 1 | 1 | 1 | 1 | 1 |
| Contig26081_RC | 1 | 0 | 1 | 0 | 0 | 0 |
| Contig26096_RC | 1 | 1 | 1 | 1 | 1 | 1 |
| Contig26141_RC | 1 | 0 | 1 | 0 | 0 | 0 |
| Contig26144_RC | 1 | 0 | 1 | 0 | 0 | 1 |
| Contig26150_RC | 1 | 0 | 1 | 1 | 0 | 1 |
| Contig26172_RC | 1 | 0 | 1 | 1 | 0 | 0 |
| Contig26193_RC | 1 | 0 | 1 | 1 | 0 | 1 |
| Contig2621_RC  | 1 | 0 | 1 | 1 | 0 | 1 |
| Contig26232_RC | 0 | 1 | 0 | 0 | 0 | 0 |
| Contig26267_RC | 1 | 0 | 1 | 1 | 0 | 1 |
| Contig26278_RC | 1 | 1 | 1 | 1 | 0 | 1 |
| Contig26295_RC | 1 | 1 | 1 | 1 | 0 | 1 |
| Contig26332_RC | 1 | 0 | 1 | 0 | 0 | 1 |
| Contig26395_RC | 1 | 1 | 1 | 1 | 0 | 1 |
| Contig2639_RC  | 0 | 0 | 1 | 0 | 0 | 0 |
| Contig263_RC   | 1 | 0 | 1 | 1 | 1 | 1 |
| Contig26421_RC | 1 | 0 | 1 | 0 | 0 | 1 |
| Contig26434_RC | 1 | 0 | 1 | 1 | 1 | 0 |
| Contig26456_RC | 0 | 0 | 0 | 0 | 0 | 1 |
| Contig2647_RC  | 1 | 1 | 1 | 1 | 1 | 1 |
| Contig2652_RC  | 1 | 0 | 1 | 0 | 0 | 1 |
| Contig26534_RC | 1 | 0 | 1 | 0 | 0 | 0 |
| Contig26573_RC | 1 | 0 | 1 | 0 | 1 | 1 |
| Contig26578_RC | 1 | 0 | 1 | 0 | 0 | 0 |
| Contig2657_RC  | 1 | 1 | 1 | 1 | 0 | 1 |
| Contig26584_RC | 1 | 1 | 0 | 0 | 0 | 1 |
| Contig26595_RC | 1 | 0 | 1 | 1 | 0 | 1 |
| Contig26616_RC | 1 | 1 | 1 | 1 | 0 | 0 |
| Contig26622_RC | 1 | 0 | 1 | 0 | 1 | 0 |

|                |   |   |   |   |   |   |
|----------------|---|---|---|---|---|---|
| Contig26625_RC | 1 | 1 | 1 | 1 | 1 | 0 |
| Contig26627_RC | 1 | 1 | 1 | 1 | 1 | 1 |
| Contig26641    | 0 | 0 | 0 | 0 | 0 | 1 |
| Contig26648_RC | 1 | 1 | 1 | 1 | 0 | 0 |
| Contig26656_RC | 0 | 0 | 0 | 0 | 0 | 1 |
| Contig26674_RC | 1 | 0 | 1 | 0 | 0 | 1 |
| Contig26706_RC | 1 | 1 | 1 | 0 | 1 | 1 |
| Contig26713_RC | 1 | 0 | 1 | 0 | 0 | 0 |
| Contig26724_RC | 1 | 1 | 1 | 1 | 0 | 1 |
| Contig26743_RC | 1 | 1 | 1 | 1 | 0 | 0 |
| Contig26760    | 1 | 1 | 1 | 0 | 0 | 0 |
| Contig26766_RC | 0 | 0 | 0 | 0 | 1 | 0 |
| Contig26835_RC | 1 | 0 | 1 | 0 | 1 | 1 |
| Contig26856_RC | 1 | 1 | 1 | 0 | 0 | 0 |
| Contig26859_RC | 1 | 1 | 1 | 1 | 0 | 1 |
| Contig26909_RC | 1 | 1 | 1 | 1 | 1 | 1 |
| Contig26936_RC | 1 | 0 | 1 | 1 | 0 | 1 |
| Contig26947_RC | 1 | 1 | 1 | 1 | 0 | 0 |
| Contig26975_RC | 1 | 0 | 1 | 0 | 0 | 0 |
| Contig26987_RC | 1 | 0 | 1 | 0 | 0 | 1 |
| Contig26988_RC | 1 | 0 | 1 | 1 | 0 | 0 |
| Contig27060_RC | 1 | 0 | 1 | 1 | 1 | 1 |
| Contig27081_RC | 1 | 1 | 1 | 1 | 1 | 1 |
| Contig27084_RC | 1 | 0 | 1 | 0 | 1 | 1 |
| Contig27106_RC | 1 | 1 | 1 | 1 | 1 | 1 |
| Contig27144_RC | 1 | 0 | 1 | 0 | 0 | 1 |
| Contig27145_RC | 1 | 0 | 1 | 1 | 1 | 1 |
| Contig27158_RC | 1 | 1 | 1 | 1 | 0 | 0 |
| Contig27167_RC | 1 | 0 | 1 | 0 | 0 | 0 |
| Contig27168_RC | 1 | 1 | 1 | 0 | 0 | 0 |
| Contig27175_RC | 1 | 0 | 1 | 1 | 1 | 1 |
| Contig27183_RC | 1 | 1 | 1 | 1 | 0 | 0 |
| Contig27184_RC | 1 | 1 | 1 | 1 | 1 | 1 |
| Contig27186_RC | 1 | 1 | 1 | 1 | 1 | 0 |
| Contig27196_RC | 1 | 0 | 1 | 0 | 0 | 1 |
| Contig27238_RC | 1 | 1 | 1 | 1 | 1 | 1 |
| Contig27245_RC | 1 | 0 | 1 | 1 | 1 | 1 |
| Contig27267_RC | 1 | 0 | 1 | 1 | 0 | 0 |
| Contig27275_RC | 1 | 0 | 1 | 1 | 1 | 0 |
| Contig2728_RC  | 1 | 1 | 1 | 1 | 0 | 0 |
| Contig27294_RC | 1 | 0 | 0 | 0 | 0 | 1 |
| Contig27300_RC | 1 | 0 | 1 | 0 | 0 | 0 |
| Contig27391_RC | 1 | 0 | 1 | 1 | 0 | 1 |
| Contig27402_RC | 1 | 0 | 1 | 1 | 0 | 1 |
| Contig27444_RC | 1 | 1 | 1 | 0 | 0 | 1 |
| Contig27456_RC | 1 | 0 | 0 | 0 | 0 | 0 |
| Contig2745_RC  | 1 | 1 | 1 | 1 | 1 | 0 |
| Contig27464_RC | 1 | 1 | 1 | 1 | 0 | 1 |
| Contig27505_RC | 1 | 0 | 1 | 0 | 0 | 1 |
| Contig27558_RC | 1 | 0 | 1 | 0 | 0 | 1 |
| Contig27580_RC | 0 | 0 | 0 | 0 | 0 | 1 |
| Contig27591_RC | 1 | 0 | 0 | 0 | 0 | 1 |

|                |   |   |   |   |   |   |
|----------------|---|---|---|---|---|---|
| Contig27593_RC | 1 | 1 | 1 | 1 | 1 | 1 |
| Contig27616_RC | 1 | 1 | 1 | 1 | 1 | 1 |
| Contig27636_RC | 1 | 0 | 1 | 0 | 0 | 1 |
| Contig27645_RC | 1 | 1 | 1 | 1 | 0 | 0 |
| Contig27679_RC | 1 | 1 | 1 | 1 | 0 | 0 |
| Contig27748_RC | 1 | 0 | 1 | 1 | 0 | 1 |
| Contig27764_RC | 0 | 0 | 1 | 0 | 0 | 0 |
| Contig27797_RC | 1 | 0 | 0 | 0 | 0 | 1 |
| Contig27799_RC | 1 | 0 | 1 | 0 | 0 | 1 |
| Contig27820_RC | 1 | 0 | 1 | 0 | 0 | 0 |
| Contig27827_RC | 1 | 0 | 1 | 1 | 1 | 1 |
| Contig27840_RC | 1 | 0 | 1 | 0 | 0 | 1 |
| Contig27884_RC | 1 | 0 | 1 | 0 | 0 | 0 |
| Contig27886_RC | 1 | 1 | 1 | 1 | 0 | 1 |
| Contig27895_RC | 1 | 0 | 1 | 0 | 0 | 1 |
| Contig27908_RC | 0 | 0 | 1 | 0 | 0 | 0 |
| Contig27925_RC | 1 | 0 | 1 | 1 | 0 | 0 |
| Contig27930_RC | 0 | 0 | 1 | 1 | 0 | 0 |
| Contig27934_RC | 1 | 0 | 1 | 0 | 0 | 1 |
| Contig27972_RC | 1 | 0 | 1 | 0 | 1 | 1 |
| Contig28001_RC | 1 | 0 | 1 | 0 | 0 | 1 |
| Contig28008_RC | 1 | 0 | 1 | 0 | 0 | 1 |
| Contig28028_RC | 1 | 0 | 1 | 1 | 1 | 1 |
| Contig28032_RC | 1 | 0 | 0 | 0 | 0 | 1 |
| Contig28045_RC | 1 | 1 | 1 | 1 | 0 | 1 |
| Contig28074_RC | 1 | 1 | 1 | 1 | 0 | 0 |
| Contig28079_RC | 1 | 0 | 0 | 0 | 0 | 1 |
| Contig28085_RC | 1 | 1 | 1 | 1 | 1 | 1 |
| Contig28098_RC | 0 | 1 | 0 | 0 | 0 | 0 |
| Contig28118_RC | 1 | 0 | 0 | 0 | 0 | 0 |
| Contig28123_RC | 1 | 0 | 1 | 0 | 0 | 0 |
| Contig28143_RC | 1 | 0 | 1 | 0 | 0 | 0 |
| Contig28161_RC | 1 | 0 | 1 | 0 | 0 | 0 |
| Contig28169_RC | 1 | 1 | 1 | 1 | 1 | 1 |
| Contig28179_RC | 1 | 0 | 1 | 0 | 1 | 1 |
| Contig28181_RC | 1 | 1 | 1 | 1 | 0 | 0 |
| Contig28185_RC | 0 | 1 | 0 | 0 | 0 | 0 |
| Contig28220_RC | 1 | 0 | 1 | 0 | 0 | 1 |
| Contig28226_RC | 1 | 1 | 1 | 1 | 1 | 1 |
| Contig28228    | 1 | 0 | 1 | 0 | 1 | 1 |
| Contig28229_RC | 1 | 1 | 1 | 1 | 0 | 1 |
| Contig28281_RC | 0 | 0 | 0 | 1 | 0 | 0 |
| Contig28285_RC | 0 | 0 | 0 | 0 | 0 | 1 |
| Contig28286_RC | 1 | 0 | 1 | 0 | 1 | 1 |
| Contig28298_RC | 1 | 0 | 1 | 1 | 0 | 0 |
| Contig28319_RC | 1 | 0 | 1 | 0 | 0 | 1 |
| Contig28339_RC | 1 | 1 | 1 | 0 | 0 | 1 |
| Contig28418_RC | 1 | 1 | 1 | 0 | 1 | 0 |
| Contig28419_RC | 1 | 0 | 1 | 0 | 0 | 0 |
| Contig28455_RC | 1 | 1 | 1 | 1 | 0 | 1 |
| Contig28472_RC | 1 | 0 | 1 | 0 | 0 | 0 |
| Contig28518_RC | 1 | 0 | 1 | 0 | 0 | 1 |

|                |   |   |   |   |   |   |
|----------------|---|---|---|---|---|---|
| Contig28522_RC | 1 | 1 | 1 | 1 | 1 | 1 |
| Contig28549    | 0 | 0 | 0 | 0 | 0 | 1 |
| Contig28560_RC | 1 | 0 | 1 | 0 | 1 | 1 |
| Contig28567_RC | 1 | 0 | 1 | 1 | 0 | 0 |
| Contig2858_RC  | 1 | 1 | 1 | 1 | 0 | 1 |
| Contig28591_RC | 1 | 0 | 1 | 0 | 0 | 1 |
| Contig28656_RC | 1 | 0 | 1 | 0 | 0 | 1 |
| Contig28668_RC | 1 | 0 | 0 | 0 | 0 | 0 |
| Contig28673_RC | 1 | 0 | 0 | 0 | 0 | 1 |
| Contig28712_RC | 1 | 0 | 1 | 0 | 0 | 1 |
| Contig2873_RC  | 1 | 1 | 1 | 1 | 0 | 1 |
| Contig28747_RC | 0 | 0 | 1 | 1 | 0 | 0 |
| Contig28760_RC | 1 | 1 | 1 | 1 | 0 | 1 |
| Contig28762_RC | 1 | 1 | 1 | 1 | 1 | 1 |
| Contig28766_RC | 1 | 1 | 1 | 1 | 0 | 0 |
| Contig28780_RC | 1 | 1 | 1 | 1 | 0 | 1 |
| Contig28784_RC | 1 | 0 | 1 | 0 | 0 | 1 |
| Contig28807_RC | 1 | 0 | 1 | 0 | 0 | 0 |
| Contig2883_RC  | 1 | 0 | 1 | 1 | 0 | 1 |
| Contig28850_RC | 1 | 0 | 1 | 0 | 1 | 1 |
| Contig28909_RC | 1 | 1 | 1 | 1 | 1 | 1 |
| Contig28941_RC | 1 | 1 | 1 | 1 | 0 | 0 |
| Contig28947_RC | 1 | 0 | 1 | 0 | 1 | 1 |
| Contig28952_RC | 1 | 0 | 1 | 1 | 0 | 0 |
| Contig28983_RC | 1 | 0 | 0 | 0 | 0 | 0 |
| Contig28996_RC | 1 | 0 | 1 | 1 | 0 | 0 |
| Contig29015_RC | 1 | 0 | 0 | 0 | 0 | 0 |
| Contig29016_RC | 1 | 1 | 1 | 0 | 0 | 1 |
| Contig29020_RC | 1 | 0 | 0 | 0 | 0 | 0 |
| Contig29022_RC | 1 | 0 | 1 | 0 | 0 | 0 |
| Contig29062_RC | 1 | 1 | 1 | 1 | 0 | 1 |
| Contig29163_RC | 1 | 1 | 1 | 1 | 0 | 0 |
| Contig29175_RC | 1 | 1 | 0 | 1 | 0 | 1 |
| Contig29193_RC | 1 | 0 | 1 | 0 | 1 | 1 |
| Contig29208_RC | 1 | 0 | 1 | 0 | 0 | 0 |
| Contig29224_RC | 1 | 0 | 0 | 0 | 0 | 1 |
| Contig29226_RC | 1 | 1 | 1 | 1 | 0 | 1 |
| Contig29277_RC | 1 | 0 | 0 | 0 | 0 | 0 |
| Contig29287_RC | 1 | 1 | 1 | 1 | 0 | 1 |
| Contig29301_RC | 1 | 0 | 1 | 0 | 0 | 1 |
| Contig2930_RC  | 1 | 1 | 1 | 1 | 1 | 0 |
| Contig29360_RC | 1 | 0 | 1 | 0 | 0 | 0 |
| Contig29362_RC | 1 | 0 | 1 | 1 | 0 | 1 |
| Contig29369_RC | 1 | 0 | 1 | 0 | 1 | 1 |
| Contig29373_RC | 1 | 0 | 1 | 0 | 0 | 0 |
| Contig29380_RC | 1 | 0 | 1 | 0 | 1 | 1 |
| Contig29396_RC | 1 | 0 | 1 | 0 | 0 | 1 |
| Contig29403_RC | 1 | 0 | 1 | 1 | 0 | 0 |
| Contig29409_RC | 1 | 0 | 0 | 0 | 0 | 0 |
| Contig29488_RC | 1 | 1 | 1 | 1 | 1 | 1 |
| Contig29509_RC | 1 | 0 | 1 | 0 | 0 | 1 |
| Contig29513_RC | 1 | 0 | 1 | 0 | 1 | 0 |

|                |   |   |   |   |   |   |
|----------------|---|---|---|---|---|---|
| Contig29647_RC | 1 | 0 | 1 | 0 | 0 | 0 |
| Contig29672_RC | 1 | 1 | 1 | 1 | 1 | 0 |
| Contig29699    | 1 | 0 | 1 | 0 | 0 | 1 |
| Contig29707    | 1 | 0 | 1 | 0 | 0 | 0 |
| Contig29721_RC | 1 | 0 | 1 | 0 | 0 | 0 |
| Contig29732_RC | 1 | 1 | 1 | 1 | 1 | 1 |
| Contig29754_RC | 1 | 0 | 1 | 0 | 0 | 1 |
| Contig29780_RC | 1 | 1 | 1 | 0 | 0 | 0 |
| Contig29788_RC | 1 | 0 | 1 | 0 | 0 | 1 |
| Contig297_RC   | 1 | 0 | 1 | 0 | 0 | 0 |
| Contig29822_RC | 1 | 0 | 1 | 0 | 0 | 1 |
| Contig29860_RC | 1 | 1 | 1 | 1 | 0 | 1 |
| Contig29921_RC | 1 | 1 | 1 | 1 | 1 | 1 |
| Contig29940_RC | 1 | 1 | 1 | 1 | 0 | 0 |
| Contig29949_RC | 1 | 0 | 1 | 0 | 0 | 0 |
| Contig29954_RC | 1 | 0 | 1 | 0 | 1 | 1 |
| Contig29955_RC | 0 | 0 | 1 | 0 | 0 | 0 |
| Contig29982_RC | 1 | 1 | 1 | 1 | 1 | 1 |
| Contig30016_RC | 1 | 0 | 0 | 0 | 0 | 1 |
| Contig30023_RC | 1 | 1 | 1 | 1 | 0 | 0 |
| Contig30029_RC | 1 | 0 | 1 | 0 | 0 | 1 |
| Contig30032_RC | 1 | 0 | 1 | 0 | 1 | 1 |
| Contig30047_RC | 1 | 0 | 1 | 0 | 1 | 1 |
| Contig30061_RC | 1 | 0 | 1 | 0 | 1 | 1 |
| Contig30070_RC | 0 | 0 | 1 | 0 | 0 | 0 |
| Contig30092_RC | 0 | 1 | 1 | 1 | 0 | 0 |
| Contig30098_RC | 1 | 1 | 1 | 1 | 1 | 1 |
| Contig30101_RC | 1 | 0 | 0 | 0 | 0 | 0 |
| Contig30119_RC | 1 | 0 | 1 | 0 | 0 | 0 |
| Contig3015_RC  | 1 | 0 | 1 | 0 | 0 | 1 |
| Contig30184_RC | 1 | 0 | 1 | 0 | 0 | 0 |
| Contig30213_RC | 1 | 0 | 1 | 0 | 0 | 1 |
| Contig30230_RC | 1 | 1 | 1 | 1 | 0 | 1 |
| Contig30239_RC | 1 | 1 | 1 | 1 | 1 | 1 |
| Contig30280_RC | 1 | 0 | 0 | 0 | 0 | 0 |
| Contig30316_RC | 1 | 1 | 1 | 0 | 0 | 1 |
| Contig30343_RC | 1 | 0 | 1 | 0 | 1 | 1 |
| Contig30350_RC | 1 | 0 | 1 | 1 | 0 | 0 |
| Contig30356_RC | 1 | 0 | 1 | 0 | 1 | 1 |
| Contig30372_RC | 1 | 0 | 1 | 0 | 0 | 0 |
| Contig30392_RC | 1 | 0 | 1 | 0 | 0 | 1 |
| Contig30411_RC | 1 | 1 | 1 | 0 | 0 | 0 |
| Contig30434_RC | 1 | 1 | 1 | 1 | 1 | 0 |
| Contig30435_RC | 1 | 0 | 1 | 1 | 0 | 1 |
| Contig30437_RC | 1 | 1 | 1 | 1 | 1 | 1 |
| Contig30480_RC | 1 | 0 | 0 | 0 | 0 | 0 |
| Contig30484_RC | 1 | 1 | 1 | 1 | 1 | 1 |
| Contig30493_RC | 1 | 0 | 1 | 0 | 0 | 1 |
| Contig30494_RC | 1 | 0 | 1 | 0 | 0 | 0 |
| Contig30499_RC | 1 | 0 | 1 | 0 | 0 | 1 |
| Contig30522_RC | 1 | 1 | 1 | 1 | 0 | 1 |
| Contig30528_RC | 1 | 0 | 1 | 0 | 0 | 1 |



|                |   |   |   |   |   |   |
|----------------|---|---|---|---|---|---|
| Contig3057_RC  | 1 | 0 | 1 | 1 | 0 | 0 |
| Contig3058_RC  | 1 | 0 | 1 | 1 | 0 | 1 |
| Contig30665_RC | 1 | 0 | 1 | 0 | 0 | 0 |
| Contig30671_RC | 1 | 0 | 1 | 0 | 0 | 1 |
| Contig30692_RC | 1 | 1 | 1 | 1 | 0 | 0 |
| Contig30735_RC | 1 | 1 | 1 | 1 | 0 | 1 |
| Contig30775_RC | 0 | 1 | 0 | 0 | 0 | 0 |
| Contig30819_RC | 1 | 0 | 1 | 0 | 0 | 1 |
| Contig30828_RC | 1 | 0 | 1 | 0 | 0 | 0 |
| Contig30833_RC | 0 | 0 | 1 | 0 | 0 | 0 |
| Contig30894_RC | 1 | 0 | 1 | 0 | 1 | 1 |
| Contig30910_RC | 1 | 1 | 1 | 1 | 1 | 1 |
| Contig30964_RC | 1 | 1 | 1 | 0 | 0 | 1 |
| Contig30972_RC | 1 | 0 | 1 | 0 | 0 | 1 |
| Contig30977_RC | 1 | 1 | 1 | 1 | 0 | 1 |
| Contig31010_RC | 1 | 1 | 1 | 1 | 0 | 0 |
| Contig31018_RC | 1 | 0 | 1 | 0 | 0 | 0 |
| Contig31028_RC | 1 | 0 | 1 | 0 | 0 | 0 |
| Contig31062_RC | 1 | 1 | 1 | 1 | 0 | 1 |
| Contig31089_RC | 1 | 0 | 1 | 0 | 0 | 1 |
| Contig31101_RC | 1 | 1 | 1 | 1 | 1 | 1 |
| Contig31122_RC | 1 | 1 | 1 | 0 | 0 | 1 |
| Contig31127_RC | 1 | 1 | 1 | 1 | 0 | 1 |
| Contig31137_RC | 1 | 0 | 1 | 0 | 0 | 1 |
| Contig31165_RC | 1 | 0 | 1 | 0 | 1 | 1 |
| Contig31172_RC | 1 | 0 | 1 | 0 | 1 | 1 |
| Contig31192_RC | 1 | 1 | 1 | 0 | 0 | 1 |
| Contig31206_RC | 1 | 1 | 1 | 1 | 1 | 0 |
| Contig31211_RC | 1 | 1 | 1 | 1 | 0 | 1 |
| Contig3124_RC  | 1 | 1 | 1 | 0 | 1 | 1 |
| Contig31258_RC | 1 | 1 | 1 | 0 | 0 | 1 |
| Contig31277_RC | 1 | 1 | 1 | 1 | 1 | 1 |
| Contig31288_RC | 1 | 0 | 1 | 0 | 1 | 1 |
| Contig31295_RC | 1 | 0 | 1 | 1 | 1 | 1 |
| Contig31322_RC | 1 | 0 | 1 | 1 | 0 | 1 |
| Contig31335_RC | 1 | 0 | 1 | 0 | 0 | 1 |
| Contig31337_RC | 1 | 1 | 1 | 0 | 0 | 1 |
| Contig31361_RC | 1 | 0 | 1 | 0 | 0 | 1 |
| Contig31391_RC | 1 | 1 | 1 | 1 | 0 | 0 |
| Contig31424_RC | 1 | 0 | 1 | 0 | 0 | 0 |
| Contig31447_RC | 1 | 0 | 0 | 0 | 0 | 0 |
| Contig31449_RC | 1 | 1 | 1 | 1 | 1 | 1 |
| Contig31461_RC | 1 | 0 | 1 | 0 | 0 | 1 |
| Contig31470_RC | 1 | 0 | 1 | 0 | 0 | 1 |
| Contig31482_RC | 1 | 1 | 1 | 1 | 0 | 0 |
| Contig31493_RC | 0 | 0 | 0 | 0 | 0 | 1 |
| Contig31495    | 1 | 0 | 1 | 1 | 0 | 0 |
| Contig31501_RC | 1 | 0 | 1 | 0 | 0 | 0 |
| Contig31509_RC | 1 | 1 | 1 | 1 | 0 | 1 |
| Contig31525_RC | 1 | 0 | 1 | 1 | 1 | 1 |
| Contig31559_RC | 1 | 1 | 1 | 1 | 1 | 1 |
| Contig31577_RC | 1 | 1 | 1 | 0 | 0 | 1 |

|                |   |   |   |   |   |   |
|----------------|---|---|---|---|---|---|
| Contig31587_RC | 1 | 0 | 1 | 0 | 0 | 1 |
| Contig31596_RC | 1 | 0 | 1 | 1 | 1 | 1 |
| Contig31613_RC | 1 | 0 | 1 | 1 | 1 | 0 |
| Contig31615_RC | 1 | 1 | 1 | 1 | 1 | 1 |
| Contig31647_RC | 1 | 0 | 1 | 0 | 0 | 1 |
| Contig31656_RC | 1 | 0 | 1 | 0 | 0 | 0 |
| Contig31661_RC | 1 | 0 | 1 | 0 | 0 | 1 |
| Contig31699_RC | 1 | 0 | 1 | 0 | 1 | 1 |
| Contig31732_RC | 1 | 0 | 1 | 1 | 0 | 0 |
| Contig31754_RC | 0 | 0 | 0 | 0 | 0 | 1 |
| Contig31757_RC | 1 | 1 | 1 | 1 | 0 | 1 |
| Contig31771_RC | 1 | 0 | 1 | 0 | 0 | 1 |
| Contig31790_RC | 1 | 0 | 1 | 0 | 0 | 0 |
| Contig31800_RC | 1 | 1 | 1 | 1 | 1 | 1 |
| Contig31830_RC | 0 | 0 | 0 | 0 | 0 | 1 |
| Contig31833_RC | 1 | 0 | 1 | 1 | 0 | 1 |
| Contig31872_RC | 0 | 0 | 0 | 1 | 0 | 0 |
| Contig31905_RC | 1 | 1 | 1 | 0 | 1 | 1 |
| Contig31913_RC | 1 | 1 | 1 | 1 | 1 | 1 |
| Contig31928_RC | 1 | 1 | 1 | 1 | 1 | 1 |
| Contig31938_RC | 1 | 0 | 1 | 1 | 0 | 0 |
| Contig31949    | 1 | 0 | 1 | 1 | 0 | 1 |
| Contig31966_RC | 1 | 0 | 1 | 0 | 0 | 1 |
| Contig31979_RC | 0 | 1 | 0 | 0 | 0 | 0 |
| Contig31985_RC | 1 | 0 | 1 | 0 | 0 | 1 |
| Contig31993_RC | 1 | 1 | 1 | 1 | 0 | 0 |
| Contig31994_RC | 1 | 0 | 1 | 1 | 0 | 0 |
| Contig32006_RC | 1 | 0 | 1 | 0 | 0 | 0 |
| Contig32017_RC | 1 | 1 | 1 | 1 | 1 | 1 |
| Contig32019_RC | 1 | 0 | 0 | 0 | 0 | 0 |
| Contig32027_RC | 1 | 0 | 1 | 0 | 0 | 1 |
| Contig32037_RC | 0 | 0 | 0 | 0 | 0 | 1 |
| Contig32043_RC | 1 | 1 | 1 | 1 | 0 | 0 |
| Contig32050_RC | 1 | 0 | 1 | 1 | 0 | 1 |
| Contig32055_RC | 1 | 0 | 0 | 0 | 0 | 1 |
| Contig32072_RC | 1 | 1 | 1 | 1 | 1 | 1 |
| Contig32084_RC | 0 | 0 | 1 | 0 | 0 | 0 |
| Contig32099_RC | 1 | 0 | 1 | 0 | 0 | 0 |
| Contig32123_RC | 1 | 1 | 1 | 1 | 1 | 1 |
| Contig32135_RC | 0 | 0 | 1 | 0 | 1 | 1 |
| Contig32137_RC | 1 | 1 | 1 | 1 | 1 | 1 |
| Contig32138_RC | 1 | 1 | 1 | 1 | 0 | 0 |
| Contig32147    | 1 | 0 | 1 | 0 | 0 | 0 |
| Contig32176_RC | 1 | 1 | 1 | 1 | 0 | 1 |
| Contig32183_RC | 1 | 0 | 1 | 1 | 0 | 0 |
| Contig321_RC   | 1 | 0 | 1 | 1 | 0 | 1 |
| Contig32213_RC | 1 | 1 | 0 | 0 | 0 | 1 |
| Contig32231_RC | 1 | 0 | 1 | 1 | 0 | 0 |
| Contig32241_RC | 1 | 0 | 1 | 0 | 0 | 1 |
| Contig32259_RC | 0 | 0 | 0 | 0 | 0 | 1 |
| Contig32268_RC | 1 | 0 | 1 | 1 | 1 | 1 |
| Contig32282_RC | 1 | 1 | 1 | 0 | 0 | 1 |

|                |   |   |   |   |   |   |
|----------------|---|---|---|---|---|---|
| Contig3228_RC  | 1 | 0 | 1 | 0 | 1 | 1 |
| Contig32316_RC | 1 | 0 | 1 | 1 | 1 | 1 |
| Contig32322_RC | 1 | 1 | 1 | 1 | 0 | 1 |
| Contig32323_RC | 1 | 1 | 1 | 1 | 0 | 0 |
| Contig32335_RC | 1 | 0 | 1 | 1 | 0 | 0 |
| Contig32336_RC | 1 | 1 | 1 | 1 | 1 | 1 |
| Contig32344_RC | 1 | 1 | 1 | 1 | 0 | 1 |
| Contig32345_RC | 1 | 0 | 1 | 1 | 1 | 1 |
| Contig32348    | 1 | 0 | 1 | 0 | 0 | 0 |
| Contig32439_RC | 0 | 0 | 0 | 0 | 0 | 1 |
| Contig32489    | 0 | 0 | 0 | 0 | 0 | 1 |
| Contig32494_RC | 1 | 0 | 0 | 0 | 0 | 0 |
| Contig32538_RC | 1 | 0 | 1 | 1 | 1 | 1 |
| Contig32558_RC | 1 | 1 | 1 | 1 | 0 | 0 |
| Contig32577_RC | 1 | 1 | 1 | 1 | 0 | 1 |
| Contig3259_RC  | 1 | 1 | 1 | 1 | 0 | 1 |
| Contig32637_RC | 1 | 1 | 1 | 1 | 0 | 1 |
| Contig32641_RC | 1 | 1 | 1 | 1 | 1 | 1 |
| Contig32649_RC | 1 | 0 | 1 | 0 | 1 | 1 |
| Contig32706_RC | 1 | 1 | 1 | 1 | 0 | 0 |
| Contig32758_RC | 1 | 0 | 1 | 0 | 0 | 1 |
| Contig32771_RC | 1 | 0 | 1 | 0 | 0 | 0 |
| Contig32798_RC | 1 | 0 | 1 | 0 | 0 | 0 |
| Contig32810    | 1 | 1 | 1 | 1 | 1 | 1 |
| Contig32899_RC | 1 | 1 | 1 | 1 | 0 | 1 |
| Contig32951_RC | 0 | 0 | 0 | 0 | 0 | 1 |
| Contig32970_RC | 1 | 0 | 1 | 0 | 0 | 0 |
| Contig32981_RC | 1 | 1 | 1 | 1 | 0 | 1 |
| Contig33003_RC | 1 | 1 | 1 | 1 | 0 | 1 |
| Contig33062_RC | 1 | 1 | 1 | 1 | 0 | 1 |
| Contig33065_RC | 1 | 1 | 1 | 1 | 0 | 1 |
| Contig33077    | 1 | 0 | 1 | 0 | 0 | 0 |
| Contig33121_RC | 0 | 0 | 0 | 0 | 0 | 1 |
| Contig3313     | 1 | 1 | 1 | 1 | 1 | 1 |
| Contig33156_RC | 1 | 0 | 0 | 0 | 0 | 1 |
| Contig33188_RC | 1 | 1 | 1 | 1 | 0 | 1 |
| Contig331_RC   | 1 | 0 | 1 | 0 | 0 | 0 |
| Contig33201_RC | 1 | 1 | 1 | 1 | 0 | 0 |
| Contig33224_RC | 1 | 1 | 1 | 1 | 0 | 0 |
| Contig33230_RC | 1 | 1 | 1 | 1 | 1 | 1 |
| Contig33235_RC | 1 | 0 | 1 | 0 | 0 | 1 |
| Contig33240_RC | 0 | 0 | 1 | 0 | 0 | 0 |
| Contig33259_RC | 1 | 0 | 1 | 0 | 0 | 0 |
| Contig33260_RC | 0 | 1 | 0 | 0 | 0 | 1 |
| Contig33276_RC | 0 | 0 | 0 | 0 | 0 | 1 |
| Contig33279_RC | 1 | 0 | 1 | 0 | 0 | 0 |
| Contig33309_RC | 1 | 0 | 1 | 0 | 0 | 0 |
| Contig33335_RC | 1 | 0 | 1 | 0 | 0 | 0 |
| Contig33343_RC | 1 | 0 | 1 | 1 | 1 | 1 |
| Contig33376_RC | 1 | 1 | 1 | 0 | 1 | 1 |
| Contig33403_RC | 1 | 0 | 1 | 1 | 0 | 1 |
| Contig33416_RC | 1 | 0 | 1 | 1 | 1 | 0 |

|                |   |   |   |   |   |   |
|----------------|---|---|---|---|---|---|
| Contig33441_RC | 1 | 1 | 1 | 0 | 0 | 1 |
| Contig33444_RC | 1 | 1 | 1 | 1 | 0 | 1 |
| Contig33445_RC | 1 | 1 | 1 | 1 | 0 | 0 |
| Contig33460_RC | 1 | 0 | 1 | 1 | 1 | 0 |
| Contig33514_RC | 1 | 0 | 1 | 0 | 0 | 1 |
| Contig33537_RC | 1 | 1 | 1 | 1 | 0 | 1 |
| Contig33540_RC | 1 | 0 | 0 | 1 | 0 | 0 |
| Contig33574_RC | 1 | 0 | 1 | 0 | 1 | 1 |
| Contig33579_RC | 1 | 1 | 1 | 1 | 0 | 1 |
| Contig3359_RC  | 1 | 1 | 1 | 1 | 0 | 1 |
| Contig33601_RC | 1 | 1 | 0 | 1 | 0 | 0 |
| Contig33613_RC | 1 | 0 | 1 | 0 | 0 | 0 |
| Contig33643_RC | 1 | 0 | 0 | 0 | 0 | 0 |
| Contig33654_RC | 1 | 0 | 1 | 0 | 1 | 0 |
| Contig33672_RC | 1 | 0 | 0 | 0 | 0 | 1 |
| Contig33697_RC | 1 | 1 | 1 | 1 | 0 | 1 |
| Contig33703_RC | 1 | 1 | 1 | 0 | 0 | 1 |
| Contig33736_RC | 1 | 0 | 1 | 0 | 0 | 0 |
| Contig33745    | 1 | 1 | 1 | 1 | 1 | 1 |
| Contig33749_RC | 1 | 0 | 1 | 0 | 0 | 0 |
| Contig33752_RC | 1 | 0 | 1 | 0 | 0 | 1 |
| Contig33758_RC | 1 | 0 | 1 | 0 | 1 | 1 |
| Contig33759_RC | 1 | 0 | 1 | 0 | 0 | 1 |
| Contig33760_RC | 1 | 1 | 1 | 1 | 1 | 1 |
| Contig33762_RC | 1 | 0 | 1 | 0 | 0 | 1 |
| Contig33767_RC | 1 | 1 | 1 | 1 | 0 | 1 |
| Contig33770_RC | 1 | 0 | 1 | 0 | 0 | 0 |
| Contig33826_RC | 0 | 1 | 0 | 1 | 0 | 0 |
| Contig33834_RC | 0 | 1 | 0 | 1 | 0 | 0 |
| Contig33855_RC | 1 | 0 | 1 | 0 | 0 | 0 |
| Contig33859_RC | 1 | 0 | 1 | 1 | 1 | 1 |
| Contig33870_RC | 1 | 0 | 1 | 0 | 0 | 0 |
| Contig33879_RC | 1 | 0 | 1 | 0 | 0 | 0 |
| Contig33882_RC | 1 | 1 | 1 | 1 | 1 | 1 |
| Contig33888_RC | 1 | 0 | 1 | 0 | 1 | 0 |
| Contig33948_RC | 1 | 1 | 1 | 1 | 0 | 1 |
| Contig33975_RC | 1 | 1 | 1 | 1 | 0 | 0 |
| Contig33979_RC | 1 | 0 | 1 | 0 | 0 | 1 |
| Contig33987    | 1 | 0 | 1 | 0 | 0 | 1 |
| Contig34004_RC | 1 | 0 | 0 | 0 | 0 | 0 |
| Contig34043_RC | 1 | 1 | 1 | 1 | 1 | 1 |
| Contig34080_RC | 1 | 1 | 1 | 1 | 0 | 1 |
| Contig34090_RC | 1 | 0 | 1 | 1 | 1 | 1 |
| Contig340_RC   | 1 | 0 | 1 | 0 | 1 | 0 |
| Contig34108_RC | 1 | 1 | 1 | 1 | 0 | 1 |
| Contig34112_RC | 1 | 0 | 1 | 0 | 0 | 0 |
| Contig34129_RC | 1 | 0 | 1 | 1 | 0 | 1 |
| Contig34234_RC | 0 | 0 | 1 | 0 | 0 | 0 |
| Contig34239_RC | 1 | 1 | 1 | 1 | 0 | 1 |
| Contig34250_RC | 1 | 0 | 0 | 0 | 0 | 0 |
| Contig34291_RC | 1 | 0 | 1 | 0 | 0 | 1 |
| Contig34327    | 1 | 1 | 1 | 1 | 0 | 0 |

|                |   |   |   |   |   |   |
|----------------|---|---|---|---|---|---|
| Contig34348_RC | 1 | 0 | 1 | 1 | 0 | 0 |
| Contig34350_RC | 1 | 1 | 1 | 1 | 1 | 1 |
| Contig34380_RC | 1 | 0 | 1 | 0 | 1 | 1 |
| Contig34393_RC | 1 | 0 | 1 | 0 | 0 | 1 |
| Contig34395_RC | 1 | 1 | 1 | 1 | 0 | 1 |
| Contig34438_RC | 1 | 0 | 1 | 0 | 1 | 1 |
| Contig34449_RC | 1 | 0 | 1 | 0 | 0 | 0 |
| Contig34450_RC | 1 | 0 | 1 | 0 | 0 | 1 |
| Contig34470_RC | 1 | 1 | 1 | 0 | 0 | 1 |
| Contig34471_RC | 0 | 0 | 1 | 0 | 0 | 0 |
| Contig34496_RC | 0 | 1 | 0 | 1 | 0 | 0 |
| Contig34539_RC | 1 | 0 | 1 | 0 | 0 | 0 |
| Contig34572_RC | 0 | 1 | 0 | 0 | 1 | 0 |
| Contig34593_RC | 1 | 0 | 1 | 1 | 1 | 1 |
| Contig34605_RC | 1 | 0 | 1 | 0 | 0 | 1 |
| Contig34644_RC | 0 | 0 | 0 | 0 | 0 | 1 |
| Contig3464_RC  | 1 | 1 | 1 | 1 | 0 | 0 |
| Contig34701_RC | 1 | 0 | 1 | 0 | 0 | 1 |
| Contig34711    | 1 | 0 | 1 | 0 | 0 | 1 |
| Contig34712_RC | 1 | 0 | 0 | 0 | 0 | 0 |
| Contig34719_RC | 0 | 0 | 0 | 0 | 0 | 1 |
| Contig34725_RC | 1 | 0 | 1 | 0 | 0 | 0 |
| Contig34732_RC | 1 | 0 | 1 | 0 | 0 | 1 |
| Contig34748_RC | 1 | 1 | 1 | 1 | 0 | 1 |
| Contig3474_RC  | 1 | 1 | 1 | 1 | 1 | 1 |
| Contig34754_RC | 1 | 0 | 1 | 0 | 0 | 0 |
| Contig34768_RC | 1 | 0 | 1 | 0 | 0 | 1 |
| Contig34779_RC | 1 | 0 | 1 | 0 | 0 | 1 |
| Contig34789    | 1 | 1 | 1 | 1 | 0 | 1 |
| Contig34811_RC | 1 | 0 | 1 | 0 | 1 | 1 |
| Contig34823_RC | 1 | 1 | 1 | 1 | 0 | 0 |
| Contig34830_RC | 1 | 0 | 1 | 0 | 0 | 1 |
| Contig34844_RC | 1 | 1 | 1 | 1 | 0 | 1 |
| Contig34872_RC | 1 | 0 | 1 | 0 | 0 | 1 |
| Contig34880_RC | 1 | 1 | 1 | 1 | 0 | 1 |
| Contig34904    | 1 | 0 | 1 | 0 | 1 | 1 |
| Contig34947_RC | 1 | 0 | 1 | 0 | 1 | 1 |
| Contig34983_RC | 1 | 1 | 1 | 0 | 0 | 1 |
| Contig34985_RC | 1 | 1 | 1 | 1 | 0 | 0 |
| Contig34986_RC | 1 | 0 | 1 | 1 | 0 | 1 |
| Contig34989_RC | 1 | 0 | 1 | 0 | 0 | 0 |
| Contig34993_RC | 1 | 1 | 1 | 1 | 0 | 1 |
| Contig35088_RC | 1 | 1 | 1 | 1 | 1 | 1 |
| Contig35096_RC | 1 | 1 | 1 | 1 | 0 | 1 |
| Contig35138_RC | 1 | 1 | 1 | 1 | 1 | 1 |
| Contig35186_RC | 1 | 0 | 1 | 0 | 0 | 1 |
| Contig35241_RC | 1 | 0 | 1 | 0 | 0 | 0 |
| Contig35251_RC | 1 | 1 | 1 | 1 | 0 | 0 |
| Contig35271_RC | 0 | 0 | 0 | 0 | 1 | 1 |
| Contig35288_RC | 1 | 0 | 1 | 0 | 0 | 0 |
| Contig35292_RC | 1 | 1 | 1 | 0 | 0 | 1 |
| Contig35294_RC | 1 | 0 | 1 | 0 | 0 | 1 |

|                |   |   |   |   |   |   |
|----------------|---|---|---|---|---|---|
| Contig35298_RC | 1 | 0 | 1 | 0 | 1 | 1 |
| Contig35321_RC | 0 | 0 | 0 | 0 | 0 | 1 |
| Contig35326_RC | 1 | 0 | 1 | 0 | 1 | 1 |
| Contig35333_RC | 1 | 1 | 1 | 1 | 0 | 0 |
| Contig35400_RC | 1 | 1 | 1 | 1 | 1 | 1 |
| Contig35416_RC | 0 | 0 | 0 | 0 | 0 | 1 |
| Contig35424_RC | 1 | 0 | 1 | 0 | 1 | 1 |
| Contig35425_RC | 1 | 1 | 1 | 1 | 0 | 1 |
| Contig35435_RC | 1 | 0 | 1 | 0 | 0 | 0 |
| Contig35455_RC | 1 | 0 | 1 | 0 | 1 | 1 |
| Contig3546     | 1 | 0 | 1 | 1 | 0 | 0 |
| Contig35464_RC | 1 | 0 | 1 | 0 | 1 | 1 |
| Contig35510_RC | 1 | 1 | 1 | 0 | 0 | 0 |
| Contig35522_RC | 1 | 0 | 1 | 0 | 0 | 1 |
| Contig35526_RC | 1 | 0 | 1 | 1 | 0 | 1 |
| Contig35537_RC | 1 | 0 | 0 | 0 | 0 | 0 |
| Contig35582_RC | 1 | 0 | 0 | 0 | 0 | 1 |
| Contig35608_RC | 1 | 1 | 1 | 0 | 0 | 1 |
| Contig35644_RC | 1 | 0 | 1 | 0 | 0 | 0 |
| Contig35657    | 1 | 0 | 1 | 1 | 0 | 0 |
| Contig35659_RC | 1 | 0 | 1 | 0 | 0 | 1 |
| Contig35672_RC | 1 | 1 | 1 | 0 | 0 | 1 |
| Contig35673_RC | 0 | 0 | 0 | 0 | 0 | 1 |
| Contig35700_RC | 1 | 0 | 1 | 1 | 1 | 1 |
| Contig35702    | 1 | 0 | 1 | 0 | 0 | 1 |
| Contig35749_RC | 1 | 1 | 1 | 1 | 1 | 1 |
| Contig35768_RC | 1 | 0 | 1 | 0 | 1 | 1 |
| Contig3576_RC  | 1 | 1 | 1 | 1 | 0 | 1 |
| Contig35799_RC | 1 | 1 | 1 | 1 | 0 | 0 |
| Contig35808_RC | 1 | 0 | 1 | 0 | 0 | 1 |
| Contig35814_RC | 1 | 1 | 1 | 1 | 0 | 0 |
| Contig35822_RC | 1 | 0 | 0 | 0 | 0 | 1 |
| Contig35866_RC | 1 | 1 | 1 | 1 | 1 | 1 |
| Contig35874_RC | 1 | 1 | 1 | 1 | 1 | 1 |
| Contig35878_RC | 0 | 1 | 0 | 1 | 0 | 0 |
| Contig35896_RC | 1 | 0 | 1 | 1 | 1 | 1 |
| Contig35927_RC | 1 | 0 | 0 | 0 | 0 | 0 |
| Contig35935    | 0 | 0 | 0 | 0 | 0 | 1 |
| Contig35947_RC | 1 | 1 | 1 | 1 | 0 | 0 |
| Contig35949_RC | 1 | 0 | 1 | 0 | 0 | 1 |
| Contig35984_RC | 1 | 0 | 1 | 0 | 0 | 1 |
| Contig36042_RC | 1 | 1 | 1 | 1 | 0 | 1 |
| Contig36052_RC | 1 | 0 | 1 | 0 | 0 | 0 |
| Contig36061_RC | 1 | 0 | 1 | 0 | 1 | 1 |
| Contig36062_RC | 1 | 0 | 1 | 0 | 0 | 1 |
| Contig36071    | 1 | 0 | 1 | 0 | 0 | 1 |
| Contig36078_RC | 1 | 0 | 1 | 0 | 1 | 0 |
| Contig36081_RC | 1 | 0 | 1 | 0 | 0 | 0 |
| Contig36101_RC | 1 | 0 | 1 | 0 | 0 | 0 |
| Contig36104_RC | 1 | 0 | 1 | 1 | 1 | 1 |
| Contig36122_RC | 1 | 1 | 1 | 1 | 0 | 1 |
| Contig36123_RC | 1 | 0 | 1 | 0 | 0 | 1 |

|                |   |   |   |   |   |   |
|----------------|---|---|---|---|---|---|
| Contig3612_RC  | 1 | 0 | 1 | 1 | 0 | 1 |
| Contig36172_RC | 1 | 0 | 1 | 0 | 0 | 1 |
| Contig36178_RC | 1 | 0 | 1 | 0 | 0 | 1 |
| Contig36233_RC | 1 | 1 | 0 | 0 | 0 | 1 |
| Contig36261_RC | 1 | 1 | 1 | 1 | 1 | 1 |
| Contig36267_RC | 1 | 0 | 1 | 0 | 0 | 0 |
| Contig36285_RC | 1 | 0 | 1 | 0 | 0 | 0 |
| Contig36307_RC | 1 | 0 | 1 | 0 | 0 | 0 |
| Contig36326_RC | 1 | 0 | 1 | 1 | 1 | 1 |
| Contig36350_RC | 1 | 0 | 1 | 1 | 1 | 1 |
| Contig36355_RC | 1 | 1 | 1 | 1 | 0 | 1 |
| Contig36363_RC | 1 | 0 | 1 | 0 | 0 | 1 |
| Contig36364_RC | 1 | 1 | 1 | 1 | 0 | 1 |
| Contig36381_RC | 1 | 0 | 0 | 0 | 0 | 0 |
| Contig36385_RC | 1 | 0 | 1 | 0 | 0 | 1 |
| Contig36412_RC | 1 | 0 | 1 | 1 | 1 | 1 |
| Contig36419_RC | 1 | 1 | 1 | 0 | 0 | 1 |
| Contig36420_RC | 1 | 1 | 1 | 1 | 0 | 0 |
| Contig36421_RC | 1 | 0 | 1 | 1 | 1 | 0 |
| Contig36432_RC | 1 | 0 | 1 | 1 | 1 | 1 |
| Contig36447    | 1 | 0 | 1 | 0 | 1 | 1 |
| Contig36448_RC | 1 | 1 | 1 | 1 | 0 | 0 |
| Contig36454_RC | 1 | 1 | 1 | 1 | 0 | 0 |
| Contig36457_RC | 1 | 0 | 1 | 0 | 1 | 0 |
| Contig36502_RC | 1 | 0 | 1 | 1 | 0 | 0 |
| Contig36511_RC | 1 | 0 | 0 | 0 | 0 | 1 |
| Contig36512_RC | 1 | 0 | 1 | 0 | 0 | 0 |
| Contig36517_RC | 1 | 0 | 1 | 1 | 0 | 1 |
| Contig36522_RC | 1 | 0 | 1 | 0 | 0 | 0 |
| Contig36533_RC | 1 | 0 | 1 | 1 | 1 | 1 |
| Contig36539_RC | 0 | 0 | 1 | 0 | 0 | 0 |
| Contig36574    | 1 | 0 | 1 | 1 | 0 | 0 |
| Contig36577_RC | 1 | 0 | 1 | 1 | 0 | 1 |
| Contig36590_RC | 0 | 0 | 1 | 0 | 0 | 0 |
| Contig36606_RC | 0 | 0 | 1 | 0 | 0 | 0 |
| Contig36614_RC | 1 | 0 | 1 | 0 | 0 | 0 |
| Contig36638_RC | 1 | 0 | 1 | 0 | 1 | 1 |
| Contig36688    | 1 | 0 | 1 | 0 | 0 | 1 |
| Contig36707_RC | 0 | 0 | 0 | 0 | 0 | 1 |
| Contig36720_RC | 0 | 0 | 0 | 0 | 0 | 1 |
| Contig36722_RC | 1 | 0 | 1 | 0 | 0 | 0 |
| Contig36728_RC | 1 | 1 | 1 | 1 | 0 | 1 |
| Contig36729_RC | 1 | 1 | 1 | 0 | 1 | 1 |
| Contig36735_RC | 1 | 1 | 1 | 0 | 1 | 1 |
| Contig36744_RC | 1 | 0 | 1 | 0 | 0 | 0 |
| Contig36794_RC | 1 | 0 | 1 | 1 | 1 | 1 |
| Contig36809_RC | 1 | 0 | 1 | 0 | 0 | 0 |
| Contig36810    | 1 | 0 | 1 | 1 | 1 | 1 |
| Contig36825_RC | 1 | 1 | 1 | 1 | 0 | 0 |
| Contig36832_RC | 1 | 0 | 0 | 0 | 0 | 1 |
| Contig36836_RC | 1 | 1 | 1 | 1 | 0 | 1 |
| Contig36843_RC | 1 | 1 | 1 | 1 | 0 | 1 |

|                |   |   |   |   |   |   |
|----------------|---|---|---|---|---|---|
| Contig36872_RC | 1 | 0 | 1 | 0 | 0 | 1 |
| Contig36888_RC | 1 | 0 | 1 | 0 | 1 | 0 |
| Contig36904_RC | 1 | 0 | 1 | 0 | 0 | 0 |
| Contig36963_RC | 1 | 1 | 1 | 1 | 0 | 0 |
| Contig36977_RC | 0 | 0 | 0 | 0 | 0 | 1 |
| Contig36980_RC | 1 | 1 | 1 | 1 | 1 | 0 |
| Contig37025_RC | 1 | 0 | 1 | 0 | 0 | 1 |
| Contig37027    | 1 | 0 | 1 | 1 | 0 | 1 |
| Contig37037_RC | 1 | 0 | 1 | 0 | 1 | 1 |
| Contig37042_RC | 1 | 1 | 1 | 1 | 0 | 0 |
| Contig37046_RC | 1 | 0 | 0 | 0 | 0 | 0 |
| Contig37063_RC | 1 | 0 | 1 | 1 | 0 | 1 |
| Contig37072_RC | 1 | 1 | 1 | 1 | 1 | 1 |
| Contig37104_RC | 1 | 0 | 0 | 0 | 0 | 0 |
| Contig37117    | 1 | 0 | 1 | 0 | 1 | 1 |
| Contig37141_RC | 1 | 1 | 1 | 1 | 0 | 1 |
| Contig37142_RC | 1 | 1 | 1 | 0 | 0 | 1 |
| Contig37188_RC | 1 | 1 | 1 | 0 | 0 | 0 |
| Contig37200_RC | 1 | 1 | 1 | 1 | 1 | 0 |
| Contig37202_RC | 1 | 0 | 1 | 0 | 0 | 1 |
| Contig37236_RC | 1 | 0 | 0 | 0 | 0 | 1 |
| Contig37262    | 1 | 0 | 1 | 0 | 0 | 1 |
| Contig37267_RC | 1 | 0 | 1 | 0 | 0 | 1 |
| Contig37281_RC | 1 | 1 | 1 | 1 | 0 | 1 |
| Contig37287_RC | 1 | 1 | 1 | 1 | 0 | 0 |
| Contig37295_RC | 1 | 0 | 1 | 0 | 0 | 0 |
| Contig37299_RC | 1 | 0 | 1 | 0 | 0 | 1 |
| Contig37300_RC | 1 | 1 | 1 | 1 | 1 | 1 |
| Contig37346    | 0 | 1 | 1 | 0 | 0 | 1 |
| Contig3734_RC  | 1 | 1 | 1 | 1 | 1 | 0 |
| Contig37371_RC | 1 | 1 | 1 | 1 | 1 | 1 |
| Contig37397_RC | 1 | 0 | 1 | 1 | 1 | 1 |
| Contig37439_RC | 1 | 1 | 1 | 1 | 0 | 1 |
| Contig37513_RC | 1 | 0 | 1 | 0 | 0 | 1 |
| Contig37540    | 1 | 0 | 1 | 0 | 0 | 1 |
| Contig37562_RC | 1 | 0 | 1 | 0 | 1 | 1 |
| Contig37577_RC | 1 | 0 | 1 | 0 | 0 | 1 |
| Contig37598    | 1 | 1 | 1 | 1 | 0 | 1 |
| Contig375_RC   | 1 | 1 | 1 | 1 | 0 | 1 |
| Contig37601_RC | 1 | 0 | 1 | 0 | 0 | 1 |
| Contig37609_RC | 1 | 0 | 1 | 0 | 0 | 1 |
| Contig37644_RC | 1 | 0 | 0 | 0 | 0 | 0 |
| Contig37660_RC | 1 | 0 | 1 | 0 | 0 | 0 |
| Contig37690_RC | 1 | 0 | 1 | 0 | 0 | 1 |
| Contig37702_RC | 1 | 0 | 0 | 0 | 0 | 0 |
| Contig37761    | 1 | 0 | 1 | 0 | 1 | 1 |
| Contig37763_RC | 1 | 0 | 1 | 1 | 1 | 1 |
| Contig37764_RC | 1 | 0 | 1 | 1 | 0 | 1 |
| Contig37852_RC | 1 | 1 | 1 | 1 | 0 | 1 |
| Contig37858_RC | 1 | 0 | 1 | 1 | 0 | 0 |
| Contig37871_RC | 0 | 0 | 0 | 0 | 0 | 1 |
| Contig37874_RC | 0 | 0 | 1 | 1 | 0 | 0 |



|                |   |   |   |   |   |   |
|----------------|---|---|---|---|---|---|
| Contig37883_RC | 1 | 1 | 1 | 0 | 0 | 0 |
| Contig37884_RC | 1 | 1 | 1 | 1 | 0 | 0 |
| Contig37895_RC | 1 | 1 | 1 | 1 | 0 | 1 |
| Contig37898_RC | 1 | 1 | 1 | 1 | 0 | 1 |
| Contig37913_RC | 1 | 0 | 0 | 0 | 0 | 1 |
| Contig37920_RC | 1 | 0 | 1 | 1 | 0 | 0 |
| Contig37941_RC | 1 | 1 | 1 | 1 | 1 | 1 |
| Contig37946_RC | 1 | 1 | 1 | 1 | 0 | 1 |
| Contig37950_RC | 1 | 1 | 1 | 1 | 1 | 1 |
| Contig37978_RC | 1 | 0 | 1 | 0 | 0 | 1 |
| Contig37989_RC | 1 | 0 | 1 | 0 | 1 | 1 |
| Contig38029_RC | 1 | 0 | 0 | 0 | 0 | 1 |
| Contig38093_RC | 1 | 1 | 1 | 1 | 0 | 0 |
| Contig38273_RC | 1 | 1 | 1 | 1 | 1 | 1 |
| Contig38285_RC | 1 | 1 | 1 | 1 | 1 | 1 |
| Contig38320_RC | 1 | 0 | 1 | 1 | 0 | 0 |
| Contig38321_RC | 1 | 0 | 1 | 0 | 1 | 1 |
| Contig3834_RC  | 1 | 0 | 1 | 0 | 0 | 1 |
| Contig38384_RC | 1 | 1 | 1 | 1 | 0 | 0 |
| Contig38398_RC | 1 | 1 | 1 | 1 | 0 | 1 |
| Contig38422_RC | 1 | 1 | 1 | 1 | 0 | 0 |
| Contig38451_RC | 1 | 1 | 1 | 1 | 0 | 1 |
| Contig38472_RC | 1 | 0 | 1 | 0 | 0 | 1 |
| Contig38479_RC | 1 | 0 | 1 | 1 | 0 | 0 |
| Contig38493_RC | 1 | 1 | 1 | 1 | 1 | 1 |
| Contig38497_RC | 1 | 1 | 1 | 0 | 1 | 0 |
| Contig38500_RC | 1 | 0 | 0 | 0 | 0 | 0 |
| Contig38529_RC | 0 | 0 | 0 | 0 | 0 | 1 |
| Contig38530_RC | 1 | 0 | 1 | 1 | 0 | 1 |
| Contig38535_RC | 1 | 0 | 1 | 0 | 1 | 1 |
| Contig38537_RC | 0 | 0 | 0 | 1 | 1 | 1 |
| Contig38542_RC | 0 | 0 | 1 | 0 | 0 | 0 |
| Contig38557_RC | 1 | 0 | 1 | 1 | 1 | 0 |
| Contig38566_RC | 1 | 0 | 1 | 0 | 1 | 1 |
| Contig38573_RC | 1 | 0 | 1 | 0 | 0 | 0 |
| Contig38580_RC | 0 | 0 | 0 | 0 | 0 | 1 |
| Contig38591_RC | 1 | 0 | 1 | 0 | 0 | 1 |
| Contig38603_RC | 1 | 1 | 1 | 1 | 1 | 1 |
| Contig38604_RC | 1 | 0 | 1 | 0 | 1 | 0 |
| Contig38613_RC | 1 | 1 | 1 | 1 | 0 | 0 |
| Contig38614_RC | 1 | 0 | 1 | 0 | 1 | 0 |
| Contig38645_RC | 1 | 1 | 1 | 1 | 1 | 1 |
| Contig38647_RC | 0 | 0 | 0 | 0 | 0 | 1 |
| Contig38654_RC | 1 | 0 | 1 | 0 | 0 | 1 |
| Contig38670_RC | 1 | 0 | 0 | 0 | 0 | 1 |
| Contig38680_RC | 1 | 1 | 1 | 1 | 1 | 1 |
| Contig38688_RC | 1 | 1 | 1 | 0 | 1 | 0 |
| Contig38702_RC | 1 | 1 | 1 | 1 | 0 | 0 |
| Contig38710_RC | 1 | 0 | 1 | 0 | 0 | 1 |
| Contig38721_RC | 1 | 0 | 1 | 1 | 1 | 1 |
| Contig38724_RC | 1 | 1 | 1 | 1 | 1 | 1 |
| Contig38731_RC | 1 | 0 | 1 | 0 | 0 | 0 |

|                |   |   |   |   |   |   |
|----------------|---|---|---|---|---|---|
| Contig38736_RC | 1 | 1 | 1 | 1 | 0 | 0 |
| Contig38744_RC | 1 | 0 | 1 | 1 | 0 | 1 |
| Contig38747_RC | 1 | 1 | 1 | 0 | 0 | 1 |
| Contig38763_RC | 1 | 1 | 1 | 1 | 1 | 1 |
| Contig38772_RC | 0 | 0 | 0 | 0 | 0 | 1 |
| Contig38803_RC | 1 | 0 | 1 | 0 | 0 | 0 |
| Contig38845_RC | 1 | 0 | 1 | 1 | 0 | 0 |
| Contig38866_RC | 1 | 0 | 1 | 0 | 0 | 1 |
| Contig38906_RC | 1 | 0 | 1 | 0 | 0 | 0 |
| Contig38908_RC | 1 | 0 | 1 | 0 | 0 | 1 |
| Contig38911_RC | 1 | 0 | 0 | 0 | 0 | 1 |
| Contig38914_RC | 1 | 0 | 1 | 0 | 0 | 0 |
| Contig38932_RC | 1 | 0 | 1 | 0 | 0 | 1 |
| Contig38936_RC | 1 | 0 | 1 | 1 | 0 | 1 |
| Contig38939_RC | 0 | 0 | 1 | 0 | 0 | 0 |
| Contig38942_RC | 1 | 0 | 1 | 1 | 0 | 1 |
| Contig38962_RC | 1 | 1 | 1 | 1 | 0 | 1 |
| Contig38965_RC | 1 | 0 | 1 | 1 | 0 | 1 |
| Contig38980_RC | 1 | 1 | 1 | 1 | 1 | 0 |
| Contig39008_RC | 1 | 1 | 1 | 1 | 1 | 0 |
| Contig39012_RC | 1 | 0 | 1 | 1 | 0 | 0 |
| Contig39015_RC | 1 | 0 | 1 | 0 | 0 | 1 |
| Contig39038_RC | 1 | 0 | 1 | 0 | 0 | 1 |
| Contig39044_RC | 1 | 0 | 1 | 1 | 1 | 1 |
| Contig39063_RC | 1 | 0 | 1 | 0 | 0 | 0 |
| Contig39087_RC | 1 | 0 | 1 | 1 | 1 | 1 |
| Contig39090_RC | 1 | 0 | 1 | 0 | 1 | 1 |
| Contig39100_RC | 0 | 0 | 0 | 0 | 0 | 1 |
| Contig39113_RC | 1 | 0 | 0 | 0 | 0 | 1 |
| Contig39122_RC | 1 | 1 | 1 | 1 | 0 | 1 |
| Contig39129_RC | 1 | 1 | 1 | 1 | 0 | 0 |
| Contig39143_RC | 1 | 0 | 1 | 0 | 0 | 1 |
| Contig39152_RC | 0 | 1 | 0 | 0 | 0 | 0 |
| Contig39157_RC | 1 | 0 | 0 | 0 | 0 | 1 |
| Contig39174_RC | 1 | 1 | 1 | 1 | 1 | 1 |
| Contig39177_RC | 1 | 0 | 1 | 0 | 0 | 0 |
| Contig39180_RC | 1 | 0 | 1 | 0 | 0 | 1 |
| Contig39226_RC | 1 | 0 | 1 | 1 | 1 | 1 |
| Contig39234    | 1 | 1 | 1 | 0 | 0 | 0 |
| Contig39242_RC | 1 | 0 | 1 | 1 | 0 | 1 |
| Contig39249    | 1 | 1 | 1 | 1 | 0 | 0 |
| Contig39268_RC | 1 | 1 | 1 | 1 | 0 | 1 |
| Contig39269    | 1 | 1 | 1 | 1 | 0 | 0 |
| Contig39297_RC | 1 | 0 | 1 | 0 | 1 | 1 |
| Contig39301_RC | 1 | 0 | 1 | 1 | 0 | 0 |
| Contig39328    | 1 | 0 | 1 | 0 | 0 | 1 |
| Contig39343_RC | 1 | 0 | 1 | 0 | 0 | 0 |
| Contig39389_RC | 1 | 1 | 1 | 0 | 0 | 1 |
| Contig39402_RC | 1 | 0 | 1 | 0 | 0 | 0 |
| Contig39408_RC | 1 | 1 | 1 | 1 | 0 | 1 |
| Contig39412_RC | 0 | 0 | 0 | 0 | 0 | 1 |
| Contig39451    | 1 | 1 | 1 | 0 | 0 | 1 |

|                |   |   |   |   |   |   |
|----------------|---|---|---|---|---|---|
| Contig39477_RC | 1 | 1 | 1 | 1 | 1 | 1 |
| Contig39478_RC | 1 | 0 | 1 | 1 | 0 | 0 |
| Contig39490_RC | 1 | 0 | 1 | 0 | 0 | 1 |
| Contig39492_RC | 0 | 0 | 0 | 0 | 0 | 1 |
| Contig39506_RC | 1 | 0 | 1 | 0 | 0 | 1 |
| Contig39514_RC | 1 | 0 | 1 | 0 | 1 | 0 |
| Contig39531_RC | 1 | 0 | 1 | 1 | 0 | 0 |
| Contig39591_RC | 1 | 1 | 1 | 1 | 1 | 1 |
| Contig39595_RC | 1 | 0 | 1 | 0 | 0 | 0 |
| Contig39616_RC | 0 | 1 | 0 | 0 | 0 | 0 |
| Contig39636_RC | 1 | 0 | 1 | 0 | 1 | 1 |
| Contig39637_RC | 1 | 0 | 1 | 1 | 0 | 1 |
| Contig39691_RC | 1 | 0 | 1 | 1 | 0 | 0 |
| Contig39714_RC | 0 | 0 | 0 | 0 | 0 | 1 |
| Contig39732_RC | 0 | 0 | 1 | 0 | 0 | 0 |
| Contig39739_RC | 1 | 0 | 1 | 1 | 0 | 1 |
| Contig39768_RC | 1 | 0 | 1 | 0 | 1 | 0 |
| Contig39786_RC | 1 | 0 | 1 | 0 | 1 | 1 |
| Contig39787_RC | 1 | 0 | 1 | 0 | 0 | 0 |
| Contig39806_RC | 1 | 1 | 1 | 1 | 0 | 0 |
| Contig39821    | 1 | 0 | 1 | 1 | 1 | 0 |
| Contig39826_RC | 1 | 0 | 1 | 0 | 0 | 1 |
| Contig39838_RC | 1 | 1 | 1 | 1 | 0 | 1 |
| Contig39861_RC | 1 | 0 | 1 | 0 | 0 | 0 |
| Contig39875    | 1 | 1 | 1 | 1 | 1 | 1 |
| Contig39877_RC | 1 | 0 | 1 | 1 | 0 | 1 |
| Contig398_RC   | 1 | 0 | 1 | 0 | 0 | 1 |
| Contig39939    | 1 | 1 | 1 | 1 | 1 | 1 |
| Contig39950_RC | 1 | 0 | 1 | 0 | 0 | 0 |
| Contig39951_RC | 1 | 1 | 1 | 1 | 1 | 0 |
| Contig39972_RC | 1 | 0 | 1 | 0 | 0 | 0 |
| Contig39983_RC | 1 | 0 | 1 | 0 | 0 | 1 |
| Contig40000_RC | 1 | 1 | 1 | 0 | 0 | 1 |
| Contig40018_RC | 1 | 0 | 1 | 1 | 0 | 1 |
| Contig40026_RC | 1 | 1 | 1 | 1 | 1 | 1 |
| Contig40055_RC | 1 | 0 | 1 | 0 | 0 | 1 |
| Contig40081_RC | 1 | 0 | 1 | 0 | 0 | 1 |
| Contig40090_RC | 1 | 1 | 1 | 1 | 1 | 1 |
| Contig40091_RC | 1 | 1 | 1 | 1 | 1 | 1 |
| Contig40099_RC | 1 | 0 | 1 | 1 | 0 | 0 |
| Contig40110_RC | 1 | 0 | 1 | 0 | 0 | 0 |
| Contig40121_RC | 1 | 0 | 1 | 0 | 0 | 1 |
| Contig40128_RC | 1 | 0 | 1 | 0 | 0 | 1 |
| Contig40145_RC | 1 | 1 | 1 | 1 | 0 | 1 |
| Contig40149_RC | 1 | 1 | 1 | 1 | 1 | 1 |
| Contig40153_RC | 1 | 1 | 1 | 1 | 0 | 1 |
| Contig40158_RC | 1 | 0 | 1 | 0 | 0 | 0 |
| Contig40165_RC | 1 | 1 | 1 | 1 | 1 | 1 |
| Contig40181_RC | 1 | 0 | 1 | 0 | 0 | 0 |
| Contig40208_RC | 1 | 0 | 1 | 0 | 0 | 1 |
| Contig40209_RC | 1 | 0 | 1 | 0 | 1 | 0 |
| Contig40221_RC | 1 | 0 | 1 | 1 | 1 | 0 |

|                |   |   |   |   |   |   |
|----------------|---|---|---|---|---|---|
| Contig40234_RC | 1 | 1 | 1 | 1 | 1 | 1 |
| Contig40239_RC | 1 | 0 | 1 | 0 | 0 | 1 |
| Contig40246_RC | 1 | 0 | 1 | 0 | 0 | 0 |
| Contig40251_RC | 1 | 0 | 1 | 0 | 0 | 0 |
| Contig40252_RC | 1 | 0 | 1 | 1 | 1 | 1 |
| Contig40272_RC | 1 | 1 | 1 | 1 | 0 | 1 |
| Contig40298_RC | 1 | 0 | 1 | 0 | 1 | 1 |
| Contig40304    | 1 | 1 | 1 | 0 | 0 | 0 |
| Contig40325_RC | 1 | 0 | 1 | 0 | 0 | 1 |
| Contig40340_RC | 1 | 1 | 1 | 1 | 0 | 0 |
| Contig40382_RC | 1 | 0 | 1 | 0 | 0 | 1 |
| Contig40385_RC | 1 | 1 | 1 | 0 | 1 | 1 |
| Contig40389_RC | 1 | 1 | 1 | 1 | 1 | 1 |
| Contig404      | 1 | 1 | 1 | 1 | 1 | 1 |
| Contig40418_RC | 1 | 0 | 1 | 0 | 0 | 0 |
| Contig40478_RC | 1 | 1 | 1 | 1 | 1 | 1 |
| Contig40516_RC | 1 | 0 | 1 | 0 | 0 | 0 |
| Contig40527_RC | 1 | 0 | 1 | 0 | 0 | 1 |
| Contig40530    | 1 | 1 | 1 | 1 | 1 | 1 |
| Contig40549_RC | 1 | 0 | 1 | 0 | 0 | 1 |
| Contig40585_RC | 1 | 1 | 1 | 0 | 1 | 1 |
| Contig40600_RC | 1 | 0 | 1 | 1 | 0 | 0 |
| Contig40613_RC | 1 | 0 | 1 | 1 | 0 | 1 |
| Contig40616_RC | 1 | 0 | 0 | 0 | 0 | 1 |
| Contig40651_RC | 1 | 1 | 1 | 1 | 0 | 1 |
| Contig40664_RC | 0 | 0 | 0 | 0 | 0 | 1 |
| Contig40676_RC | 1 | 0 | 1 | 0 | 1 | 1 |
| Contig40695_RC | 1 | 0 | 0 | 0 | 0 | 0 |
| Contig40740_RC | 0 | 0 | 1 | 0 | 0 | 1 |
| Contig40743_RC | 1 | 0 | 1 | 1 | 0 | 0 |
| Contig40764_RC | 1 | 0 | 1 | 0 | 0 | 1 |
| Contig40765_RC | 1 | 0 | 1 | 0 | 0 | 0 |
| Contig40785_RC | 1 | 1 | 1 | 1 | 1 | 1 |
| Contig40831_RC | 0 | 0 | 1 | 0 | 0 | 1 |
| Contig40832_RC | 1 | 1 | 1 | 1 | 1 | 1 |
| Contig40845_RC | 1 | 0 | 1 | 0 | 0 | 1 |
| Contig40867_RC | 1 | 0 | 1 | 0 | 1 | 0 |
| Contig40887_RC | 1 | 0 | 1 | 0 | 0 | 0 |
| Contig40903_RC | 1 | 0 | 1 | 0 | 1 | 1 |
| Contig40916_RC | 1 | 0 | 0 | 0 | 0 | 1 |
| Contig40920    | 1 | 0 | 1 | 0 | 0 | 0 |
| Contig40954_RC | 1 | 1 | 1 | 1 | 0 | 1 |
| Contig40964_RC | 1 | 0 | 1 | 0 | 0 | 1 |
| Contig40967_RC | 1 | 0 | 0 | 0 | 0 | 1 |
| Contig40997_RC | 1 | 0 | 1 | 0 | 1 | 0 |
| Contig41005_RC | 1 | 1 | 1 | 1 | 0 | 1 |
| Contig41012_RC | 1 | 1 | 1 | 1 | 0 | 0 |
| Contig41035    | 1 | 1 | 1 | 0 | 0 | 1 |
| Contig41041_RC | 1 | 0 | 1 | 1 | 1 | 1 |
| Contig41075_RC | 1 | 0 | 1 | 0 | 0 | 0 |
| Contig41078_RC | 1 | 0 | 1 | 0 | 0 | 1 |
| Contig41079_RC | 1 | 1 | 0 | 0 | 0 | 1 |

|                |   |   |   |   |   |   |
|----------------|---|---|---|---|---|---|
| Contig41086_RC | 1 | 0 | 1 | 1 | 1 | 1 |
| Contig41095_RC | 1 | 0 | 1 | 0 | 1 | 1 |
| Contig41106_RC | 1 | 0 | 1 | 0 | 0 | 0 |
| Contig41121_RC | 1 | 1 | 1 | 1 | 1 | 1 |
| Contig41154_RC | 1 | 1 | 0 | 0 | 0 | 1 |
| Contig41156_RC | 1 | 1 | 1 | 1 | 0 | 0 |
| Contig41169_RC | 1 | 0 | 1 | 0 | 0 | 0 |
| Contig41195_RC | 1 | 0 | 1 | 0 | 0 | 0 |
| Contig41198_RC | 1 | 1 | 1 | 1 | 0 | 0 |
| Contig41210_RC | 1 | 0 | 1 | 0 | 0 | 0 |
| Contig41228_RC | 0 | 0 | 0 | 0 | 0 | 1 |
| Contig41244_RC | 1 | 0 | 1 | 0 | 1 | 1 |
| Contig41275_RC | 1 | 1 | 1 | 1 | 1 | 1 |
| Contig41277_RC | 1 | 0 | 1 | 1 | 0 | 1 |
| Contig41291_RC | 1 | 0 | 1 | 1 | 1 | 0 |
| Contig41302_RC | 1 | 1 | 1 | 1 | 0 | 1 |
| Contig41328    | 0 | 0 | 0 | 0 | 0 | 1 |
| Contig41352_RC | 1 | 0 | 1 | 0 | 0 | 1 |
| Contig41363_RC | 1 | 0 | 1 | 0 | 0 | 0 |
| Contig41377_RC | 1 | 1 | 1 | 1 | 1 | 1 |
| Contig41384_RC | 1 | 0 | 1 | 0 | 0 | 1 |
| Contig41385_RC | 1 | 0 | 1 | 1 | 0 | 0 |
| Contig41392_RC | 1 | 0 | 1 | 0 | 0 | 0 |
| Contig41398_RC | 1 | 1 | 1 | 1 | 0 | 1 |
| Contig41404    | 1 | 0 | 0 | 0 | 0 | 1 |
| Contig41413_RC | 1 | 1 | 1 | 0 | 1 | 1 |
| Contig41476_RC | 1 | 0 | 1 | 1 | 1 | 1 |
| Contig41496_RC | 1 | 0 | 1 | 0 | 1 | 1 |
| Contig41498_RC | 1 | 0 | 1 | 1 | 1 | 1 |
| Contig41516    | 1 | 0 | 1 | 0 | 0 | 1 |
| Contig41524_RC | 1 | 0 | 1 | 0 | 1 | 1 |
| Contig41560_RC | 1 | 1 | 1 | 1 | 1 | 1 |
| Contig41578_RC | 1 | 0 | 1 | 1 | 0 | 1 |
| Contig41585_RC | 1 | 0 | 1 | 0 | 0 | 1 |
| Contig41587_RC | 1 | 0 | 1 | 0 | 0 | 1 |
| Contig41618_RC | 1 | 1 | 1 | 1 | 0 | 1 |
| Contig41635_RC | 1 | 0 | 1 | 1 | 1 | 1 |
| Contig41656_RC | 1 | 0 | 1 | 1 | 1 | 1 |
| Contig41726_RC | 1 | 0 | 1 | 0 | 0 | 1 |
| Contig41750_RC | 1 | 1 | 1 | 1 | 0 | 0 |
| Contig41766_RC | 1 | 0 | 0 | 0 | 0 | 0 |
| Contig41774_RC | 1 | 1 | 1 | 1 | 1 | 1 |
| Contig41798_RC | 1 | 1 | 1 | 1 | 1 | 0 |
| Contig41804_RC | 1 | 0 | 0 | 0 | 0 | 1 |
| Contig41817_RC | 1 | 0 | 1 | 0 | 0 | 0 |
| Contig41828_RC | 1 | 0 | 1 | 1 | 1 | 1 |
| Contig41850_RC | 1 | 0 | 1 | 0 | 1 | 1 |
| Contig41852    | 1 | 0 | 1 | 0 | 0 | 0 |
| Contig41869_RC | 1 | 0 | 1 | 0 | 0 | 0 |
| Contig41877_RC | 1 | 1 | 1 | 1 | 0 | 1 |
| Contig41883_RC | 1 | 0 | 1 | 0 | 0 | 1 |
| Contig41905_RC | 1 | 0 | 1 | 1 | 0 | 0 |

|                |   |   |   |   |   |   |
|----------------|---|---|---|---|---|---|
| Contig41954_RC | 1 | 0 | 1 | 0 | 1 | 1 |
| Contig41973_RC | 1 | 0 | 1 | 0 | 0 | 1 |
| Contig41983_RC | 1 | 0 | 1 | 1 | 1 | 0 |
| Contig42006_RC | 1 | 1 | 1 | 1 | 1 | 1 |
| Contig42012_RC | 1 | 0 | 1 | 1 | 1 | 1 |
| Contig42022_RC | 1 | 0 | 1 | 0 | 0 | 1 |
| Contig42026_RC | 1 | 1 | 1 | 1 | 0 | 1 |
| Contig42038_RC | 1 | 0 | 1 | 1 | 1 | 1 |
| Contig42058_RC | 1 | 1 | 1 | 1 | 1 | 1 |
| Contig42141_RC | 1 | 0 | 0 | 0 | 0 | 1 |
| Contig42146_RC | 1 | 1 | 1 | 1 | 0 | 1 |
| Contig42153_RC | 1 | 0 | 1 | 0 | 0 | 0 |
| Contig42161_RC | 1 | 0 | 1 | 0 | 0 | 0 |
| Contig42213_RC | 1 | 0 | 1 | 0 | 0 | 1 |
| Contig42215_RC | 1 | 0 | 1 | 0 | 0 | 0 |
| Contig42220_RC | 1 | 1 | 1 | 1 | 0 | 1 |
| Contig42253_RC | 1 | 0 | 1 | 1 | 1 | 1 |
| Contig42256_RC | 1 | 1 | 1 | 1 | 1 | 1 |
| Contig42263_RC | 1 | 0 | 1 | 1 | 1 | 1 |
| Contig42270_RC | 1 | 0 | 1 | 1 | 1 | 1 |
| Contig42274_RC | 1 | 1 | 1 | 1 | 0 | 0 |
| Contig42297_RC | 0 | 0 | 1 | 1 | 0 | 0 |
| Contig42306_RC | 1 | 1 | 1 | 0 | 0 | 1 |
| Contig42328_RC | 1 | 0 | 1 | 0 | 1 | 1 |
| Contig42330_RC | 1 | 0 | 1 | 1 | 0 | 0 |
| Contig42342_RC | 1 | 1 | 1 | 1 | 1 | 1 |
| Contig42354    | 0 | 0 | 0 | 0 | 0 | 1 |
| Contig42355_RC | 0 | 0 | 0 | 0 | 0 | 1 |
| Contig42395_RC | 1 | 0 | 1 | 1 | 1 | 1 |
| Contig42427_RC | 1 | 0 | 1 | 1 | 0 | 1 |
| Contig42428_RC | 0 | 0 | 0 | 0 | 0 | 1 |
| Contig42430_RC | 1 | 1 | 1 | 1 | 1 | 1 |
| Contig42437_RC | 1 | 1 | 1 | 1 | 1 | 0 |
| Contig42475    | 1 | 0 | 1 | 1 | 0 | 0 |
| Contig42476_RC | 1 | 0 | 1 | 1 | 0 | 0 |
| Contig42490_RC | 1 | 0 | 1 | 0 | 0 | 1 |
| Contig42515_RC | 1 | 0 | 1 | 0 | 0 | 1 |
| Contig42518_RC | 1 | 1 | 1 | 0 | 0 | 0 |
| Contig42531_RC | 1 | 1 | 1 | 1 | 1 | 1 |
| Contig42547    | 1 | 0 | 1 | 0 | 0 | 1 |
| Contig42593_RC | 1 | 1 | 0 | 0 | 0 | 1 |
| Contig42597_RC | 1 | 1 | 1 | 0 | 0 | 0 |
| Contig42599_RC | 1 | 1 | 1 | 0 | 1 | 1 |
| Contig42603_RC | 0 | 0 | 1 | 0 | 0 | 0 |
| Contig42617_RC | 1 | 0 | 1 | 0 | 0 | 0 |
| Contig42631_RC | 0 | 0 | 0 | 0 | 0 | 1 |
| Contig42647_RC | 1 | 0 | 1 | 0 | 0 | 1 |
| Contig42649_RC | 1 | 1 | 1 | 0 | 1 | 1 |
| Contig42661_RC | 1 | 0 | 1 | 0 | 0 | 0 |
| Contig42671_RC | 1 | 0 | 1 | 0 | 0 | 1 |
| Contig42694_RC | 1 | 0 | 1 | 0 | 0 | 0 |
| Contig42711_RC | 1 | 0 | 1 | 0 | 0 | 0 |

|                |   |   |   |   |   |   |
|----------------|---|---|---|---|---|---|
| Contig42728_RC | 1 | 0 | 1 | 0 | 0 | 1 |
| Contig42740_RC | 1 | 1 | 1 | 0 | 0 | 1 |
| Contig42770_RC | 1 | 0 | 1 | 1 | 1 | 0 |
| Contig42854    | 1 | 0 | 1 | 0 | 1 | 1 |
| Contig42867    | 1 | 0 | 1 | 0 | 0 | 1 |
| Contig42882_RC | 1 | 1 | 1 | 1 | 0 | 1 |
| Contig42884_RC | 1 | 1 | 1 | 1 | 1 | 1 |
| Contig42898_RC | 1 | 0 | 1 | 1 | 0 | 0 |
| Contig42919_RC | 1 | 1 | 1 | 1 | 0 | 0 |
| Contig42930_RC | 1 | 1 | 1 | 1 | 1 | 1 |
| Contig42933_RC | 1 | 0 | 1 | 0 | 1 | 1 |
| Contig42962_RC | 1 | 1 | 1 | 1 | 0 | 1 |
| Contig42977_RC | 1 | 1 | 1 | 1 | 0 | 1 |
| Contig43009_RC | 1 | 1 | 1 | 1 | 1 | 1 |
| Contig43027_RC | 1 | 1 | 1 | 1 | 1 | 1 |
| Contig43034_RC | 1 | 1 | 1 | 1 | 1 | 1 |
| Contig43039_RC | 1 | 0 | 1 | 1 | 1 | 1 |
| Contig43083_RC | 1 | 0 | 1 | 1 | 1 | 0 |
| Contig43096_RC | 1 | 0 | 1 | 1 | 1 | 0 |
| Contig43167_RC | 1 | 0 | 1 | 1 | 0 | 1 |
| Contig43187_RC | 1 | 1 | 1 | 1 | 1 | 1 |
| Contig43189_RC | 1 | 1 | 1 | 0 | 0 | 0 |
| Contig43195_RC | 1 | 0 | 0 | 0 | 0 | 0 |
| Contig43199_RC | 1 | 0 | 1 | 0 | 0 | 1 |
| Contig431_RC   | 1 | 0 | 1 | 1 | 1 | 1 |
| Contig43202_RC | 1 | 1 | 1 | 1 | 0 | 1 |
| Contig43206_RC | 0 | 0 | 0 | 1 | 0 | 0 |
| Contig43253_RC | 1 | 1 | 1 | 1 | 1 | 0 |
| Contig43254_RC | 1 | 1 | 1 | 1 | 1 | 1 |
| Contig43273_RC | 1 | 1 | 1 | 1 | 0 | 1 |
| Contig43277_RC | 1 | 1 | 1 | 1 | 1 | 1 |
| Contig43289_RC | 1 | 1 | 1 | 1 | 0 | 1 |
| Contig43314_RC | 1 | 0 | 1 | 0 | 1 | 1 |
| Contig43330_RC | 1 | 0 | 1 | 0 | 0 | 1 |
| Contig43338_RC | 1 | 0 | 1 | 0 | 0 | 1 |
| Contig43373_RC | 1 | 0 | 1 | 1 | 0 | 1 |
| Contig43410_RC | 1 | 0 | 1 | 1 | 0 | 1 |
| Contig43415_RC | 1 | 0 | 1 | 1 | 1 | 1 |
| Contig43416_RC | 1 | 1 | 1 | 1 | 0 | 0 |
| Contig43433_RC | 1 | 0 | 1 | 1 | 1 | 1 |
| Contig43435_RC | 1 | 1 | 1 | 1 | 0 | 0 |
| Contig43449_RC | 1 | 0 | 1 | 0 | 0 | 1 |
| Contig43464_RC | 1 | 0 | 1 | 1 | 0 | 1 |
| Contig43474_RC | 1 | 1 | 1 | 1 | 0 | 1 |
| Contig43481_RC | 1 | 0 | 1 | 1 | 1 | 0 |
| Contig43513_RC | 1 | 0 | 1 | 0 | 1 | 1 |
| Contig43527    | 0 | 0 | 0 | 0 | 0 | 1 |
| Contig43534    | 1 | 0 | 1 | 0 | 0 | 0 |
| Contig43540_RC | 1 | 0 | 1 | 1 | 0 | 0 |
| Contig43542_RC | 1 | 0 | 1 | 1 | 1 | 1 |
| Contig43586_RC | 1 | 0 | 1 | 1 | 0 | 1 |
| Contig43599_RC | 1 | 0 | 1 | 1 | 1 | 0 |

|                |   |   |   |   |   |   |
|----------------|---|---|---|---|---|---|
| Contig436      | 1 | 0 | 1 | 1 | 0 | 0 |
| Contig43601_RC | 0 | 0 | 0 | 0 | 0 | 1 |
| Contig43613_RC | 1 | 0 | 1 | 0 | 1 | 0 |
| Contig43632_RC | 1 | 1 | 1 | 1 | 0 | 1 |
| Contig43639_RC | 0 | 0 | 0 | 0 | 0 | 1 |
| Contig43645_RC | 1 | 0 | 1 | 0 | 1 | 1 |
| Contig4365_RC  | 1 | 1 | 1 | 1 | 0 | 1 |
| Contig43667_RC | 1 | 1 | 1 | 1 | 1 | 1 |
| Contig43688_RC | 1 | 0 | 1 | 0 | 0 | 0 |
| Contig43703_RC | 1 | 0 | 1 | 1 | 1 | 1 |
| Contig43708_RC | 0 | 0 | 1 | 0 | 0 | 0 |
| Contig43710_RC | 1 | 0 | 1 | 0 | 0 | 1 |
| Contig43713_RC | 1 | 1 | 1 | 1 | 0 | 1 |
| Contig43750_RC | 1 | 0 | 1 | 0 | 0 | 0 |
| Contig43777_RC | 1 | 1 | 1 | 1 | 0 | 1 |
| Contig43791_RC | 1 | 0 | 1 | 0 | 0 | 1 |
| Contig43807_RC | 1 | 0 | 1 | 1 | 1 | 0 |
| Contig43817_RC | 1 | 0 | 1 | 0 | 0 | 1 |
| Contig43822_RC | 1 | 0 | 1 | 0 | 1 | 1 |
| Contig43826_RC | 1 | 0 | 1 | 0 | 0 | 0 |
| Contig4382_RC  | 1 | 1 | 1 | 1 | 0 | 0 |
| Contig43833_RC | 0 | 0 | 0 | 1 | 0 | 0 |
| Contig43834_RC | 1 | 0 | 1 | 0 | 0 | 1 |
| Contig43846_RC | 1 | 0 | 1 | 1 | 0 | 0 |
| Contig43853_RC | 1 | 0 | 1 | 0 | 1 | 1 |
| Contig43871_RC | 1 | 0 | 1 | 0 | 1 | 1 |
| Contig438_RC   | 1 | 0 | 1 | 1 | 1 | 1 |
| Contig43905_RC | 1 | 0 | 1 | 0 | 0 | 0 |
| Contig43923_RC | 1 | 0 | 1 | 0 | 1 | 0 |
| Contig43927_RC | 1 | 0 | 1 | 1 | 1 | 1 |
| Contig43944_RC | 1 | 1 | 0 | 0 | 0 | 0 |
| Contig43973    | 1 | 0 | 1 | 0 | 1 | 1 |
| Contig44010_RC | 1 | 1 | 1 | 0 | 0 | 0 |
| Contig44040_RC | 1 | 0 | 1 | 0 | 0 | 1 |
| Contig44054_RC | 1 | 0 | 1 | 0 | 0 | 1 |
| Contig44068_RC | 1 | 0 | 1 | 1 | 1 | 1 |
| Contig44076_RC | 1 | 0 | 1 | 0 | 0 | 0 |
| Contig44111_RC | 1 | 0 | 0 | 0 | 0 | 0 |
| Contig44124_RC | 1 | 1 | 1 | 1 | 0 | 1 |
| Contig44145_RC | 1 | 1 | 1 | 0 | 0 | 0 |
| Contig44159_RC | 1 | 1 | 1 | 1 | 0 | 0 |
| Contig44168_RC | 1 | 0 | 1 | 1 | 1 | 1 |
| Contig44180_RC | 1 | 0 | 1 | 0 | 0 | 1 |
| Contig44186_RC | 1 | 0 | 1 | 1 | 0 | 1 |
| Contig44192_RC | 1 | 0 | 1 | 1 | 1 | 1 |
| Contig44211_RC | 1 | 1 | 1 | 1 | 0 | 0 |
| Contig44236    | 0 | 1 | 0 | 0 | 0 | 0 |
| Contig44251_RC | 1 | 0 | 1 | 1 | 1 | 1 |
| Contig44254_RC | 1 | 0 | 1 | 0 | 0 | 0 |
| Contig44260_RC | 1 | 0 | 1 | 0 | 0 | 0 |
| Contig44265_RC | 1 | 0 | 1 | 0 | 1 | 0 |
| Contig44269_RC | 1 | 1 | 1 | 1 | 1 | 1 |



|                |   |   |   |   |   |   |
|----------------|---|---|---|---|---|---|
| Contig44271_RC | 1 | 1 | 1 | 1 | 0 | 1 |
| Contig44324    | 1 | 1 | 1 | 1 | 0 | 1 |
| Contig44325_RC | 1 | 1 | 1 | 1 | 0 | 0 |
| Contig44331_RC | 1 | 0 | 1 | 0 | 0 | 0 |
| Contig44382_RC | 1 | 1 | 1 | 1 | 1 | 1 |
| Contig44383_RC | 1 | 1 | 1 | 1 | 0 | 1 |
| Contig44384_RC | 1 | 0 | 1 | 0 | 0 | 1 |
| Contig44415    | 1 | 0 | 1 | 0 | 1 | 1 |
| Contig44425_RC | 1 | 1 | 1 | 1 | 1 | 0 |
| Contig44431_RC | 1 | 0 | 1 | 0 | 1 | 1 |
| Contig44451_RC | 1 | 0 | 1 | 0 | 0 | 0 |
| Contig44492_RC | 1 | 1 | 1 | 1 | 1 | 0 |
| Contig44534_RC | 1 | 1 | 1 | 0 | 0 | 1 |
| Contig44538_RC | 1 | 1 | 1 | 1 | 1 | 1 |
| Contig44548_RC | 1 | 0 | 1 | 0 | 0 | 1 |
| Contig44568_RC | 1 | 0 | 1 | 1 | 0 | 0 |
| Contig44593_RC | 1 | 1 | 1 | 1 | 1 | 1 |
| Contig44604_RC | 0 | 0 | 1 | 1 | 0 | 1 |
| Contig44605_RC | 1 | 0 | 1 | 0 | 1 | 1 |
| Contig44611_RC | 1 | 1 | 1 | 1 | 1 | 1 |
| Contig44622_RC | 1 | 0 | 1 | 1 | 1 | 1 |
| Contig44641_RC | 1 | 1 | 1 | 1 | 0 | 1 |
| Contig44656_RC | 1 | 0 | 1 | 0 | 0 | 1 |
| Contig44659_RC | 1 | 0 | 1 | 1 | 0 | 1 |
| Contig44682_RC | 1 | 0 | 0 | 0 | 0 | 1 |
| Contig44690_RC | 1 | 1 | 1 | 1 | 0 | 1 |
| Contig44694_RC | 1 | 0 | 1 | 1 | 0 | 0 |
| Contig44707_RC | 1 | 1 | 1 | 1 | 1 | 1 |
| Contig44712_RC | 1 | 0 | 1 | 1 | 1 | 1 |
| Contig44729_RC | 1 | 0 | 1 | 0 | 1 | 1 |
| Contig44758_RC | 1 | 0 | 1 | 0 | 1 | 1 |
| Contig44782_RC | 1 | 1 | 1 | 1 | 1 | 0 |
| Contig44799_RC | 1 | 0 | 1 | 1 | 0 | 0 |
| Contig44805_RC | 1 | 1 | 1 | 1 | 1 | 1 |
| Contig44829_RC | 1 | 1 | 1 | 1 | 0 | 1 |
| Contig44867_RC | 1 | 0 | 0 | 0 | 0 | 0 |
| Contig44877_RC | 0 | 0 | 0 | 0 | 0 | 1 |
| Contig44886_RC | 1 | 0 | 1 | 1 | 1 | 1 |
| Contig44890_RC | 1 | 1 | 1 | 1 | 0 | 0 |
| Contig448_RC   | 1 | 1 | 1 | 1 | 1 | 0 |
| Contig44953_RC | 1 | 1 | 1 | 1 | 0 | 1 |
| Contig44964_RC | 1 | 1 | 1 | 0 | 0 | 1 |
| Contig45014_RC | 1 | 0 | 1 | 0 | 1 | 0 |
| Contig45037_RC | 1 | 0 | 1 | 0 | 0 | 0 |
| Contig45051_RC | 1 | 0 | 0 | 0 | 0 | 1 |
| Contig45082_RC | 1 | 0 | 1 | 0 | 1 | 1 |
| Contig45090_RC | 1 | 1 | 1 | 1 | 0 | 1 |
| Contig45091_RC | 1 | 0 | 1 | 0 | 0 | 1 |
| Contig45093_RC | 1 | 0 | 1 | 0 | 0 | 0 |
| Contig45100_RC | 1 | 0 | 1 | 1 | 0 | 0 |
| Contig45119_RC | 1 | 0 | 1 | 0 | 0 | 0 |
| Contig45122_RC | 1 | 0 | 1 | 0 | 1 | 1 |

|                |   |   |   |   |   |   |
|----------------|---|---|---|---|---|---|
| Contig45185_RC | 1 | 1 | 1 | 1 | 0 | 1 |
| Contig45195_RC | 1 | 0 | 1 | 1 | 1 | 1 |
| Contig45266    | 1 | 1 | 1 | 0 | 0 | 0 |
| Contig45272_RC | 1 | 0 | 1 | 1 | 0 | 1 |
| Contig45273_RC | 1 | 1 | 1 | 1 | 1 | 1 |
| Contig45279_RC | 1 | 0 | 1 | 1 | 0 | 1 |
| Contig45298_RC | 1 | 0 | 1 | 1 | 0 | 1 |
| Contig45303_RC | 0 | 0 | 0 | 0 | 0 | 1 |
| Contig45316_RC | 1 | 0 | 1 | 0 | 0 | 1 |
| Contig45321    | 1 | 0 | 1 | 0 | 1 | 1 |
| Contig45328_RC | 1 | 1 | 1 | 1 | 0 | 1 |
| Contig45338_RC | 1 | 1 | 1 | 0 | 0 | 1 |
| Contig45345_RC | 1 | 0 | 1 | 0 | 0 | 1 |
| Contig45367_RC | 1 | 0 | 1 | 0 | 1 | 0 |
| Contig4539     | 1 | 1 | 1 | 1 | 0 | 0 |
| Contig453_RC   | 1 | 0 | 1 | 0 | 0 | 0 |
| Contig45437    | 1 | 1 | 1 | 1 | 1 | 1 |
| Contig45442_RC | 1 | 0 | 1 | 0 | 0 | 1 |
| Contig45443_RC | 1 | 1 | 1 | 1 | 0 | 1 |
| Contig45455_RC | 1 | 0 | 1 | 0 | 1 | 1 |
| Contig45464_RC | 1 | 1 | 1 | 0 | 0 | 0 |
| Contig45465_RC | 1 | 0 | 1 | 1 | 0 | 0 |
| Contig45469_RC | 1 | 1 | 1 | 1 | 1 | 1 |
| Contig45505_RC | 0 | 0 | 0 | 0 | 0 | 1 |
| Contig45544_RC | 1 | 0 | 1 | 0 | 1 | 1 |
| Contig45547_RC | 1 | 0 | 1 | 0 | 1 | 1 |
| Contig45549_RC | 1 | 0 | 1 | 0 | 0 | 0 |
| Contig45586_RC | 1 | 0 | 1 | 0 | 0 | 0 |
| Contig45618_RC | 1 | 0 | 1 | 0 | 0 | 0 |
| Contig45624_RC | 1 | 1 | 1 | 1 | 1 | 1 |
| Contig45634_RC | 1 | 0 | 1 | 1 | 1 | 1 |
| Contig45657    | 1 | 0 | 1 | 1 | 0 | 0 |
| Contig45742    | 1 | 0 | 1 | 0 | 0 | 0 |
| Contig45782_RC | 1 | 0 | 0 | 0 | 0 | 1 |
| Contig45786_RC | 1 | 0 | 1 | 0 | 0 | 1 |
| Contig45792_RC | 1 | 0 | 1 | 0 | 0 | 0 |
| Contig45799    | 1 | 0 | 1 | 0 | 0 | 0 |
| Contig45834_RC | 1 | 1 | 1 | 0 | 0 | 1 |
| Contig45841_RC | 1 | 1 | 1 | 1 | 0 | 0 |
| Contig45859_RC | 1 | 0 | 1 | 1 | 1 | 0 |
| Contig45889_RC | 0 | 0 | 0 | 0 | 0 | 1 |
| Contig45891_RC | 1 | 1 | 1 | 1 | 1 | 1 |
| Contig45908_RC | 1 | 1 | 1 | 0 | 0 | 0 |
| Contig45911_RC | 1 | 1 | 1 | 1 | 1 | 0 |
| Contig45914_RC | 1 | 0 | 1 | 1 | 0 | 0 |
| Contig4595     | 1 | 1 | 1 | 0 | 1 | 1 |
| Contig45953_RC | 0 | 0 | 0 | 0 | 0 | 1 |
| Contig45955_RC | 1 | 1 | 1 | 1 | 1 | 1 |
| Contig45964_RC | 0 | 1 | 0 | 0 | 0 | 0 |
| Contig45969    | 1 | 0 | 1 | 1 | 1 | 1 |
| Contig45970_RC | 1 | 0 | 1 | 1 | 1 | 1 |
| Contig45982_RC | 1 | 1 | 1 | 1 | 0 | 1 |

|                |   |   |   |   |   |   |
|----------------|---|---|---|---|---|---|
| Contig45995_RC | 1 | 0 | 1 | 0 | 0 | 1 |
| Contig46002_RC | 1 | 1 | 1 | 1 | 0 | 0 |
| Contig46007    | 1 | 0 | 0 | 0 | 0 | 1 |
| Contig46015_RC | 1 | 1 | 1 | 0 | 0 | 1 |
| Contig46075_RC | 1 | 0 | 1 | 0 | 1 | 1 |
| Contig46136_RC | 1 | 0 | 0 | 0 | 0 | 0 |
| Contig46158_RC | 1 | 1 | 1 | 1 | 1 | 0 |
| Contig46176_RC | 1 | 0 | 1 | 0 | 0 | 1 |
| Contig46178_RC | 1 | 0 | 1 | 0 | 0 | 1 |
| Contig46181_RC | 1 | 1 | 1 | 1 | 1 | 0 |
| Contig46182_RC | 1 | 1 | 1 | 1 | 0 | 0 |
| Contig46187_RC | 1 | 0 | 1 | 1 | 0 | 0 |
| Contig461_RC   | 1 | 0 | 1 | 0 | 0 | 1 |
| Contig46201    | 1 | 1 | 1 | 0 | 0 | 0 |
| Contig46202    | 1 | 0 | 1 | 1 | 1 | 1 |
| Contig46217_RC | 1 | 1 | 1 | 1 | 0 | 1 |
| Contig46218_RC | 1 | 0 | 1 | 0 | 1 | 1 |
| Contig46223_RC | 1 | 0 | 0 | 0 | 0 | 1 |
| Contig46224_RC | 1 | 0 | 0 | 0 | 0 | 1 |
| Contig46241_RC | 1 | 1 | 1 | 1 | 0 | 1 |
| Contig46243_RC | 1 | 0 | 1 | 0 | 0 | 1 |
| Contig46244_RC | 1 | 0 | 1 | 0 | 1 | 1 |
| Contig46254_RC | 1 | 0 | 1 | 0 | 0 | 0 |
| Contig46288_RC | 1 | 0 | 1 | 1 | 1 | 1 |
| Contig46289_RC | 1 | 1 | 1 | 1 | 1 | 1 |
| Contig46324_RC | 1 | 0 | 1 | 1 | 0 | 0 |
| Contig46341_RC | 1 | 1 | 1 | 1 | 0 | 0 |
| Contig46351_RC | 1 | 1 | 1 | 1 | 1 | 0 |
| Contig46362_RC | 1 | 0 | 1 | 0 | 0 | 0 |
| Contig46375_RC | 1 | 1 | 1 | 0 | 1 | 1 |
| Contig46376_RC | 1 | 1 | 1 | 1 | 1 | 1 |
| Contig46409_RC | 0 | 0 | 1 | 0 | 0 | 0 |
| Contig46411_RC | 1 | 0 | 1 | 0 | 0 | 0 |
| Contig46414_RC | 1 | 0 | 1 | 0 | 0 | 0 |
| Contig46421_RC | 1 | 1 | 1 | 1 | 1 | 0 |
| Contig46452_RC | 1 | 0 | 1 | 0 | 1 | 1 |
| Contig46464_RC | 1 | 0 | 1 | 1 | 0 | 0 |
| Contig46468    | 1 | 0 | 1 | 1 | 1 | 1 |
| Contig46525_RC | 1 | 0 | 1 | 0 | 0 | 1 |
| Contig46553_RC | 1 | 1 | 1 | 1 | 0 | 0 |
| Contig46563_RC | 1 | 1 | 1 | 1 | 1 | 1 |
| Contig46564_RC | 1 | 0 | 1 | 1 | 1 | 1 |
| Contig46589_RC | 1 | 1 | 1 | 1 | 0 | 0 |
| Contig46590    | 1 | 1 | 1 | 1 | 0 | 1 |
| Contig46591_RC | 1 | 0 | 1 | 0 | 0 | 1 |
| Contig46595_RC | 1 | 1 | 1 | 1 | 0 | 1 |
| Contig46597_RC | 1 | 0 | 0 | 0 | 0 | 0 |
| Contig46598_RC | 1 | 0 | 1 | 0 | 0 | 0 |
| Contig46602_RC | 1 | 0 | 1 | 1 | 1 | 1 |
| Contig46609_RC | 1 | 0 | 1 | 0 | 0 | 0 |
| Contig46615_RC | 1 | 1 | 1 | 0 | 0 | 1 |
| Contig46631_RC | 1 | 0 | 1 | 0 | 0 | 0 |

|                |   |   |   |   |   |   |
|----------------|---|---|---|---|---|---|
| Contig46646_RC | 1 | 0 | 1 | 0 | 1 | 0 |
| Contig46653_RC | 1 | 0 | 1 | 0 | 0 | 1 |
| Contig46668_RC | 1 | 1 | 1 | 1 | 0 | 0 |
| Contig46677_RC | 0 | 0 | 0 | 0 | 0 | 1 |
| Contig46680_RC | 1 | 0 | 1 | 0 | 1 | 1 |
| Contig46697_RC | 0 | 0 | 0 | 0 | 0 | 1 |
| Contig46732_RC | 1 | 0 | 1 | 0 | 1 | 1 |
| Contig46747_RC | 1 | 1 | 1 | 0 | 0 | 1 |
| Contig46756_RC | 1 | 0 | 1 | 1 | 0 | 1 |
| Contig46773_RC | 1 | 1 | 1 | 1 | 0 | 0 |
| Contig46782_RC | 1 | 1 | 1 | 1 | 1 | 1 |
| Contig46789_RC | 1 | 0 | 1 | 0 | 0 | 0 |
| Contig46816_RC | 1 | 1 | 1 | 1 | 0 | 0 |
| Contig46817_RC | 1 | 0 | 1 | 0 | 0 | 0 |
| Contig46823_RC | 1 | 1 | 1 | 0 | 0 | 1 |
| Contig46868_RC | 1 | 0 | 1 | 0 | 0 | 0 |
| Contig46881_RC | 1 | 1 | 1 | 1 | 0 | 0 |
| Contig46911_RC | 0 | 0 | 1 | 0 | 0 | 0 |
| Contig46913_RC | 1 | 0 | 1 | 0 | 1 | 1 |
| Contig46918_RC | 1 | 0 | 1 | 0 | 0 | 1 |
| Contig46925    | 1 | 0 | 1 | 0 | 1 | 1 |
| Contig46954_RC | 1 | 1 | 1 | 1 | 0 | 1 |
| Contig46989_RC | 1 | 0 | 1 | 1 | 0 | 0 |
| Contig46991_RC | 1 | 1 | 1 | 1 | 1 | 0 |
| Contig47005_RC | 1 | 0 | 1 | 0 | 1 | 1 |
| Contig47065_RC | 1 | 0 | 1 | 0 | 0 | 0 |
| Contig47071_RC | 1 | 1 | 1 | 0 | 1 | 0 |
| Contig47078_RC | 1 | 0 | 1 | 0 | 1 | 1 |
| Contig47081_RC | 1 | 1 | 1 | 1 | 0 | 1 |
| Contig47102_RC | 1 | 1 | 1 | 1 | 1 | 1 |
| Contig47128_RC | 1 | 0 | 1 | 0 | 0 | 0 |
| Contig47129    | 1 | 1 | 1 | 1 | 1 | 1 |
| Contig47146_RC | 1 | 1 | 1 | 0 | 1 | 0 |
| Contig47150_RC | 0 | 0 | 0 | 0 | 0 | 1 |
| Contig47178_RC | 1 | 0 | 1 | 0 | 0 | 0 |
| Contig47179_RC | 1 | 0 | 1 | 1 | 1 | 1 |
| Contig47184_RC | 1 | 0 | 1 | 0 | 1 | 1 |
| Contig47196_RC | 1 | 0 | 1 | 1 | 0 | 1 |
| Contig47220    | 1 | 0 | 1 | 1 | 0 | 0 |
| Contig47221_RC | 1 | 0 | 1 | 1 | 1 | 0 |
| Contig47222_RC | 1 | 1 | 1 | 0 | 0 | 1 |
| Contig47225_RC | 1 | 0 | 1 | 0 | 0 | 1 |
| Contig47247_RC | 1 | 1 | 1 | 1 | 1 | 1 |
| Contig47252_RC | 1 | 1 | 1 | 1 | 1 | 1 |
| Contig47267_RC | 1 | 0 | 1 | 1 | 1 | 1 |
| Contig47294_RC | 1 | 1 | 1 | 1 | 1 | 1 |
| Contig47297_RC | 1 | 1 | 1 | 1 | 0 | 1 |
| Contig47301_RC | 1 | 0 | 1 | 0 | 0 | 0 |
| Contig47304_RC | 1 | 0 | 1 | 1 | 1 | 0 |
| Contig47308_RC | 1 | 1 | 1 | 1 | 1 | 1 |
| Contig47326    | 1 | 1 | 1 | 1 | 0 | 1 |
| Contig47339_RC | 1 | 1 | 1 | 1 | 0 | 0 |

|                |   |   |   |   |   |   |
|----------------|---|---|---|---|---|---|
| Contig47381_RC | 1 | 1 | 1 | 1 | 0 | 1 |
| Contig47416_RC | 1 | 1 | 1 | 1 | 0 | 0 |
| Contig47441_RC | 1 | 0 | 1 | 0 | 1 | 1 |
| Contig47462_RC | 1 | 0 | 1 | 1 | 1 | 1 |
| Contig47463_RC | 1 | 0 | 1 | 1 | 0 | 0 |
| Contig47483_RC | 1 | 1 | 1 | 1 | 1 | 1 |
| Contig47493_RC | 1 | 0 | 1 | 1 | 0 | 1 |
| Contig47495_RC | 1 | 1 | 1 | 1 | 1 | 1 |
| Contig47512_RC | 1 | 1 | 1 | 1 | 0 | 0 |
| Contig47519_RC | 1 | 0 | 1 | 0 | 0 | 0 |
| Contig47539_RC | 1 | 0 | 1 | 0 | 1 | 1 |
| Contig47555_RC | 0 | 0 | 0 | 0 | 0 | 1 |
| Contig475_RC   | 1 | 0 | 1 | 0 | 0 | 1 |
| Contig47624_RC | 1 | 1 | 1 | 1 | 1 | 1 |
| Contig47629_RC | 1 | 1 | 1 | 0 | 0 | 1 |
| Contig47648_RC | 1 | 0 | 1 | 0 | 0 | 0 |
| Contig47680_RC | 1 | 0 | 1 | 0 | 0 | 0 |
| Contig47683_RC | 1 | 0 | 1 | 1 | 1 | 1 |
| Contig47741_RC | 1 | 0 | 1 | 0 | 0 | 0 |
| Contig47767_RC | 1 | 1 | 1 | 1 | 0 | 0 |
| Contig47779_RC | 1 | 1 | 0 | 0 | 0 | 1 |
| Contig47781_RC | 0 | 0 | 1 | 0 | 0 | 0 |
| Contig47787_RC | 1 | 0 | 0 | 0 | 0 | 1 |
| Contig47796_RC | 1 | 0 | 1 | 1 | 1 | 1 |
| Contig47810_RC | 1 | 1 | 1 | 1 | 1 | 1 |
| Contig47835_RC | 1 | 1 | 1 | 1 | 0 | 1 |
| Contig47846_RC | 1 | 1 | 1 | 1 | 0 | 0 |
| Contig47879_RC | 1 | 1 | 1 | 1 | 0 | 0 |
| Contig47882_RC | 1 | 0 | 1 | 1 | 0 | 1 |
| Contig47885_RC | 0 | 0 | 1 | 0 | 0 | 1 |
| Contig47895_RC | 1 | 0 | 0 | 0 | 0 | 0 |
| Contig47919_RC | 1 | 0 | 1 | 0 | 0 | 0 |
| Contig47922_RC | 1 | 0 | 1 | 0 | 0 | 0 |
| Contig47930_RC | 1 | 0 | 1 | 1 | 1 | 0 |
| Contig47944    | 1 | 0 | 1 | 0 | 1 | 0 |
| Contig47954_RC | 1 | 0 | 1 | 0 | 0 | 0 |
| Contig47966_RC | 1 | 0 | 1 | 0 | 0 | 1 |
| Contig47994_RC | 1 | 1 | 1 | 0 | 0 | 0 |
| Contig48007_RC | 1 | 1 | 1 | 1 | 0 | 0 |
| Contig48014_RC | 1 | 0 | 1 | 0 | 0 | 1 |
| Contig48019_RC | 1 | 0 | 1 | 0 | 0 | 1 |
| Contig48021_RC | 1 | 1 | 1 | 0 | 1 | 1 |
| Contig48043_RC | 1 | 1 | 1 | 1 | 1 | 1 |
| Contig48057_RC | 1 | 0 | 1 | 0 | 0 | 0 |
| Contig48076_RC | 1 | 0 | 1 | 0 | 0 | 1 |
| Contig48177_RC | 1 | 1 | 1 | 1 | 0 | 0 |
| Contig48185_RC | 1 | 0 | 1 | 0 | 1 | 0 |
| Contig48208_RC | 1 | 1 | 1 | 1 | 1 | 1 |
| Contig48249_RC | 1 | 0 | 1 | 1 | 1 | 1 |
| Contig48256_RC | 1 | 0 | 1 | 1 | 0 | 1 |
| Contig48259_RC | 1 | 0 | 1 | 0 | 0 | 0 |
| Contig48267_RC | 1 | 0 | 1 | 1 | 1 | 1 |

|                |   |   |   |   |   |   |
|----------------|---|---|---|---|---|---|
| Contig48270_RC | 1 | 0 | 1 | 1 | 0 | 1 |
| Contig48278_RC | 1 | 1 | 1 | 1 | 1 | 1 |
| Contig48290_RC | 1 | 0 | 1 | 0 | 0 | 1 |
| Contig48295_RC | 1 | 0 | 1 | 0 | 0 | 1 |
| Contig48318_RC | 1 | 1 | 1 | 1 | 0 | 1 |
| Contig48358_RC | 1 | 0 | 1 | 0 | 0 | 1 |
| Contig48371    | 1 | 1 | 1 | 1 | 1 | 1 |
| Contig48400_RC | 1 | 0 | 1 | 0 | 0 | 0 |
| Contig48406_RC | 1 | 1 | 1 | 1 | 0 | 1 |
| Contig48430_RC | 1 | 0 | 1 | 0 | 1 | 1 |
| Contig48436_RC | 1 | 1 | 1 | 1 | 0 | 0 |
| Contig48473_RC | 1 | 0 | 0 | 0 | 0 | 0 |
| Contig48480_RC | 1 | 1 | 1 | 1 | 1 | 1 |
| Contig48481    | 1 | 1 | 1 | 1 | 1 | 0 |
| Contig48489_RC | 1 | 0 | 1 | 0 | 0 | 1 |
| Contig48494_RC | 1 | 0 | 1 | 0 | 0 | 0 |
| Contig48496_RC | 0 | 0 | 0 | 0 | 0 | 1 |
| Contig48506_RC | 1 | 0 | 1 | 0 | 1 | 1 |
| Contig48518_RC | 1 | 0 | 1 | 0 | 0 | 0 |
| Contig48521_RC | 1 | 1 | 1 | 1 | 0 | 0 |
| Contig48523_RC | 1 | 0 | 1 | 1 | 0 | 0 |
| Contig48542_RC | 1 | 0 | 1 | 1 | 0 | 0 |
| Contig48571_RC | 1 | 0 | 1 | 1 | 0 | 1 |
| Contig48613_RC | 0 | 0 | 1 | 0 | 0 | 0 |
| Contig48643_RC | 1 | 0 | 1 | 0 | 1 | 0 |
| Contig48653_RC | 1 | 1 | 1 | 1 | 0 | 1 |
| Contig48659_RC | 1 | 0 | 1 | 1 | 1 | 1 |
| Contig48712_RC | 1 | 0 | 1 | 0 | 0 | 0 |
| Contig48715_RC | 1 | 1 | 1 | 1 | 1 | 1 |
| Contig48722_RC | 1 | 0 | 1 | 0 | 0 | 1 |
| Contig48728_RC | 1 | 0 | 1 | 0 | 1 | 1 |
| Contig48764_RC | 1 | 0 | 1 | 0 | 0 | 1 |
| Contig48774_RC | 1 | 1 | 1 | 1 | 1 | 1 |
| Contig48799_RC | 1 | 0 | 1 | 1 | 1 | 1 |
| Contig48800_RC | 1 | 0 | 1 | 1 | 1 | 1 |
| Contig48806_RC | 1 | 1 | 1 | 1 | 1 | 1 |
| Contig48809_RC | 1 | 1 | 1 | 0 | 0 | 1 |
| Contig48824_RC | 1 | 1 | 1 | 0 | 0 | 1 |
| Contig48834_RC | 1 | 0 | 1 | 0 | 1 | 1 |
| Contig48835_RC | 1 | 1 | 1 | 1 | 1 | 1 |
| Contig48842_RC | 0 | 0 | 0 | 0 | 0 | 1 |
| Contig48852_RC | 1 | 1 | 1 | 1 | 1 | 1 |
| Contig48869_RC | 1 | 0 | 1 | 1 | 1 | 1 |
| Contig48877_RC | 1 | 0 | 1 | 0 | 0 | 1 |
| Contig48910_RC | 1 | 0 | 0 | 0 | 0 | 0 |
| Contig48913_RC | 1 | 0 | 1 | 0 | 1 | 1 |
| Contig48928_RC | 1 | 0 | 1 | 0 | 0 | 1 |
| Contig48931_RC | 1 | 1 | 1 | 1 | 1 | 1 |
| Contig48944_RC | 1 | 1 | 1 | 0 | 0 | 1 |
| Contig48945_RC | 1 | 1 | 1 | 0 | 0 | 1 |
| Contig48950_RC | 1 | 0 | 1 | 0 | 1 | 0 |
| Contig48954_RC | 1 | 1 | 1 | 1 | 0 | 0 |

|                |   |   |   |   |   |   |
|----------------|---|---|---|---|---|---|
| Contig48971_RC | 1 | 0 | 1 | 0 | 0 | 0 |
| Contig48983_RC | 1 | 1 | 1 | 1 | 1 | 1 |
| Contig48988_RC | 1 | 1 | 1 | 1 | 0 | 1 |
| Contig49000_RC | 1 | 0 | 1 | 0 | 0 | 0 |
| Contig49013_RC | 1 | 1 | 1 | 1 | 0 | 1 |
| Contig49038_RC | 1 | 0 | 1 | 0 | 1 | 0 |
| Contig49076_RC | 1 | 1 | 1 | 1 | 0 | 0 |
| Contig49095_RC | 1 | 0 | 1 | 1 | 1 | 1 |
| Contig49135_RC | 1 | 0 | 1 | 1 | 0 | 1 |
| Contig49139_RC | 1 | 0 | 1 | 0 | 0 | 1 |
| Contig49153    | 1 | 0 | 1 | 0 | 0 | 1 |
| Contig49175_RC | 1 | 0 | 1 | 1 | 1 | 1 |
| Contig49181_RC | 1 | 1 | 1 | 1 | 1 | 1 |
| Contig49197_RC | 1 | 0 | 1 | 0 | 0 | 0 |
| Contig49255_RC | 1 | 0 | 1 | 1 | 1 | 0 |
| Contig49270_RC | 1 | 1 | 1 | 0 | 1 | 1 |
| Contig49273_RC | 1 | 1 | 1 | 1 | 0 | 1 |
| Contig49306_RC | 1 | 1 | 1 | 1 | 1 | 1 |
| Contig49319_RC | 1 | 0 | 1 | 1 | 1 | 0 |
| Contig49342_RC | 1 | 1 | 1 | 1 | 1 | 1 |
| Contig49369_RC | 1 | 1 | 1 | 0 | 0 | 1 |
| Contig49405_RC | 1 | 0 | 1 | 0 | 0 | 0 |
| Contig49409    | 1 | 0 | 1 | 1 | 1 | 1 |
| Contig49422_RC | 1 | 1 | 1 | 1 | 1 | 1 |
| Contig49437_RC | 1 | 0 | 1 | 0 | 0 | 0 |
| Contig49461_RC | 1 | 1 | 1 | 1 | 0 | 1 |
| Contig49462_RC | 1 | 0 | 1 | 1 | 1 | 1 |
| Contig49468_RC | 1 | 0 | 1 | 1 | 1 | 1 |
| Contig49480_RC | 1 | 0 | 1 | 0 | 0 | 0 |
| Contig49512_RC | 1 | 0 | 1 | 0 | 1 | 0 |
| Contig49520_RC | 1 | 1 | 1 | 1 | 1 | 1 |
| Contig49532_RC | 1 | 0 | 1 | 0 | 1 | 1 |
| Contig49578_RC | 1 | 0 | 1 | 1 | 0 | 1 |
| Contig49589_RC | 1 | 1 | 1 | 1 | 0 | 1 |
| Contig49591_RC | 1 | 1 | 1 | 1 | 0 | 1 |
| Contig49606_RC | 1 | 0 | 0 | 0 | 0 | 1 |
| Contig49614_RC | 1 | 0 | 1 | 1 | 1 | 0 |
| Contig49652_RC | 1 | 1 | 1 | 1 | 1 | 1 |
| Contig49657_RC | 1 | 0 | 1 | 1 | 0 | 0 |
| Contig49670_RC | 1 | 1 | 1 | 1 | 0 | 1 |
| Contig49700_RC | 1 | 1 | 1 | 1 | 0 | 1 |
| Contig49707_RC | 1 | 0 | 1 | 1 | 1 | 1 |
| Contig49711_RC | 1 | 1 | 1 | 1 | 1 | 1 |
| Contig49723_RC | 1 | 0 | 0 | 0 | 0 | 1 |
| Contig49743_RC | 1 | 0 | 1 | 1 | 1 | 1 |
| Contig49756_RC | 1 | 1 | 1 | 1 | 1 | 1 |
| Contig49768_RC | 1 | 0 | 1 | 1 | 1 | 1 |
| Contig49789_RC | 1 | 0 | 1 | 0 | 0 | 0 |
| Contig49790_RC | 1 | 0 | 1 | 0 | 1 | 1 |
| Contig49806_RC | 1 | 1 | 1 | 0 | 1 | 1 |
| Contig49811_RC | 0 | 1 | 0 | 0 | 0 | 1 |
| Contig49835_RC | 1 | 1 | 1 | 1 | 1 | 0 |

|                |   |   |   |   |   |   |
|----------------|---|---|---|---|---|---|
| Contig49869_RC | 1 | 0 | 1 | 0 | 0 | 1 |
| Contig49890_RC | 1 | 1 | 1 | 1 | 1 | 1 |
| Contig49891_RC | 1 | 0 | 1 | 0 | 1 | 1 |
| Contig49910_RC | 1 | 0 | 1 | 1 | 0 | 0 |
| Contig49931_RC | 1 | 0 | 1 | 0 | 0 | 1 |
| Contig49943_RC | 1 | 1 | 1 | 1 | 0 | 0 |
| Contig50004_RC | 1 | 1 | 1 | 0 | 1 | 1 |
| Contig50013_RC | 1 | 1 | 1 | 1 | 0 | 1 |
| Contig50088_RC | 1 | 1 | 1 | 1 | 1 | 0 |
| Contig50106_RC | 1 | 1 | 1 | 1 | 1 | 0 |
| Contig50117_RC | 1 | 0 | 1 | 0 | 1 | 1 |
| Contig50129_RC | 1 | 0 | 1 | 0 | 1 | 0 |
| Contig50156_RC | 1 | 0 | 1 | 0 | 0 | 0 |
| Contig50173_RC | 1 | 0 | 1 | 0 | 0 | 0 |
| Contig50184_RC | 1 | 1 | 1 | 1 | 1 | 0 |
| Contig50189_RC | 1 | 0 | 1 | 1 | 0 | 0 |
| Contig50206_RC | 1 | 0 | 1 | 0 | 0 | 0 |
| Contig50228_RC | 1 | 0 | 1 | 1 | 1 | 0 |
| Contig50241_RC | 1 | 1 | 1 | 1 | 1 | 1 |
| Contig50249_RC | 1 | 1 | 1 | 1 | 0 | 1 |
| Contig50251_RC | 1 | 0 | 1 | 0 | 0 | 0 |
| Contig50276_RC | 1 | 1 | 1 | 1 | 0 | 1 |
| Contig50297_RC | 1 | 1 | 1 | 1 | 0 | 0 |
| Contig50324_RC | 1 | 0 | 1 | 0 | 1 | 1 |
| Contig50334_RC | 1 | 1 | 1 | 0 | 1 | 1 |
| Contig50355_RC | 1 | 1 | 1 | 1 | 0 | 1 |
| Contig50368    | 0 | 0 | 0 | 0 | 0 | 1 |
| Contig50388_RC | 1 | 0 | 1 | 0 | 0 | 1 |
| Contig50391_RC | 1 | 0 | 1 | 0 | 1 | 1 |
| Contig50396_RC | 1 | 1 | 1 | 1 | 1 | 1 |
| Contig50403_RC | 1 | 0 | 1 | 0 | 0 | 1 |
| Contig50410    | 1 | 1 | 1 | 1 | 0 | 1 |
| Contig50436_RC | 1 | 0 | 1 | 0 | 0 | 0 |
| Contig50483    | 1 | 1 | 1 | 1 | 0 | 0 |
| Contig50486_RC | 1 | 0 | 1 | 0 | 1 | 1 |
| Contig50501_RC | 1 | 1 | 1 | 1 | 1 | 1 |
| Contig50523_RC | 1 | 0 | 1 | 0 | 1 | 1 |
| Contig50538_RC | 1 | 1 | 1 | 0 | 1 | 1 |
| Contig50584_RC | 1 | 0 | 1 | 1 | 0 | 1 |
| Contig50605_RC | 1 | 1 | 1 | 1 | 0 | 1 |
| Contig50628_RC | 1 | 0 | 1 | 1 | 0 | 0 |
| Contig50660_RC | 1 | 0 | 1 | 0 | 1 | 0 |
| Contig50666_RC | 1 | 0 | 1 | 0 | 0 | 0 |
| Contig50728_RC | 1 | 1 | 1 | 1 | 1 | 1 |
| Contig50731_RC | 1 | 0 | 1 | 0 | 0 | 1 |
| Contig50755_RC | 1 | 0 | 1 | 1 | 0 | 1 |
| Contig50769_RC | 0 | 0 | 0 | 0 | 0 | 1 |
| Contig50799_RC | 1 | 0 | 1 | 1 | 0 | 0 |
| Contig50815_RC | 1 | 0 | 1 | 0 | 0 | 1 |
| Contig50831_RC | 1 | 1 | 1 | 1 | 0 | 1 |
| Contig50836_RC | 1 | 1 | 1 | 1 | 0 | 0 |
| Contig50846_RC | 1 | 1 | 1 | 1 | 0 | 0 |



|                |   |   |   |   |   |   |
|----------------|---|---|---|---|---|---|
| Contig50850_RC | 1 | 0 | 1 | 1 | 0 | 1 |
| Contig50855_RC | 1 | 0 | 1 | 1 | 0 | 1 |
| Contig50883_RC | 1 | 1 | 1 | 1 | 0 | 1 |
| Contig50891_RC | 1 | 0 | 1 | 1 | 1 | 1 |
| Contig50905_RC | 1 | 1 | 1 | 1 | 0 | 0 |
| Contig50915_RC | 1 | 0 | 1 | 0 | 0 | 0 |
| Contig50921_RC | 0 | 1 | 0 | 1 | 0 | 0 |
| Contig50938_RC | 0 | 0 | 0 | 0 | 0 | 1 |
| Contig50939_RC | 1 | 0 | 1 | 1 | 1 | 1 |
| Contig50979_RC | 1 | 1 | 1 | 1 | 1 | 1 |
| Contig51006_RC | 1 | 0 | 1 | 1 | 1 | 1 |
| Contig51015_RC | 1 | 0 | 1 | 0 | 1 | 1 |
| Contig51018_RC | 1 | 1 | 1 | 1 | 0 | 0 |
| Contig51020_RC | 1 | 0 | 1 | 0 | 1 | 1 |
| Contig51058_RC | 1 | 0 | 1 | 1 | 1 | 0 |
| Contig51066_RC | 1 | 1 | 1 | 1 | 0 | 0 |
| Contig51068_RC | 1 | 1 | 1 | 0 | 1 | 0 |
| Contig51108_RC | 1 | 1 | 1 | 1 | 0 | 1 |
| Contig51138_RC | 1 | 0 | 1 | 0 | 0 | 0 |
| Contig51140_RC | 1 | 0 | 1 | 1 | 0 | 1 |
| Contig51153_RC | 1 | 1 | 1 | 1 | 0 | 1 |
| Contig51158_RC | 1 | 0 | 1 | 1 | 0 | 1 |
| Contig51174_RC | 1 | 1 | 1 | 1 | 0 | 1 |
| Contig51176_RC | 1 | 1 | 1 | 1 | 1 | 1 |
| Contig51208    | 1 | 0 | 1 | 0 | 0 | 0 |
| Contig51235_RC | 1 | 1 | 1 | 1 | 0 | 1 |
| Contig51252    | 1 | 1 | 1 | 1 | 1 | 1 |
| Contig51254_RC | 1 | 1 | 1 | 1 | 0 | 0 |
| Contig51291_RC | 1 | 0 | 1 | 1 | 1 | 1 |
| Contig51292_RC | 1 | 1 | 1 | 1 | 0 | 1 |
| Contig51293_RC | 1 | 0 | 0 | 0 | 0 | 1 |
| Contig51309_RC | 1 | 0 | 1 | 0 | 0 | 0 |
| Contig51328_RC | 1 | 0 | 1 | 0 | 0 | 0 |
| Contig51338_RC | 1 | 0 | 1 | 0 | 0 | 0 |
| Contig51339_RC | 1 | 1 | 1 | 1 | 0 | 1 |
| Contig51352_RC | 1 | 0 | 1 | 0 | 0 | 0 |
| Contig51353_RC | 1 | 0 | 1 | 0 | 0 | 0 |
| Contig51369_RC | 1 | 1 | 1 | 1 | 1 | 1 |
| Contig51373_RC | 1 | 0 | 1 | 0 | 0 | 0 |
| Contig51392_RC | 1 | 0 | 1 | 0 | 1 | 1 |
| Contig51400_RC | 1 | 0 | 1 | 0 | 1 | 0 |
| Contig51403_RC | 1 | 1 | 1 | 0 | 0 | 1 |
| Contig51441_RC | 1 | 0 | 1 | 1 | 1 | 1 |
| Contig51442_RC | 1 | 0 | 1 | 1 | 1 | 1 |
| Contig51449_RC | 1 | 1 | 1 | 1 | 1 | 1 |
| Contig51464_RC | 1 | 1 | 1 | 0 | 1 | 1 |
| Contig51486_RC | 1 | 1 | 1 | 1 | 0 | 0 |
| Contig51501_RC | 1 | 1 | 1 | 1 | 0 | 1 |
| Contig51519_RC | 1 | 0 | 1 | 0 | 1 | 1 |
| Contig51548_RC | 1 | 0 | 1 | 0 | 1 | 1 |
| Contig51555_RC | 0 | 0 | 1 | 0 | 0 | 0 |
| Contig51558_RC | 1 | 0 | 1 | 0 | 0 | 1 |

|                |   |   |   |   |   |   |
|----------------|---|---|---|---|---|---|
| Contig51583_RC | 1 | 0 | 1 | 0 | 1 | 1 |
| Contig51621_RC | 1 | 0 | 1 | 0 | 1 | 1 |
| Contig51625_RC | 1 | 0 | 1 | 0 | 0 | 1 |
| Contig51635_RC | 1 | 0 | 1 | 1 | 0 | 1 |
| Contig51652_RC | 1 | 0 | 1 | 1 | 0 | 0 |
| Contig51675_RC | 1 | 0 | 1 | 0 | 0 | 1 |
| Contig51687_RC | 1 | 0 | 1 | 1 | 1 | 0 |
| Contig51690_RC | 1 | 0 | 1 | 0 | 0 | 1 |
| Contig51723_RC | 1 | 0 | 1 | 1 | 1 | 1 |
| Contig51726_RC | 1 | 1 | 1 | 0 | 1 | 1 |
| Contig51732_RC | 1 | 1 | 1 | 1 | 1 | 1 |
| Contig51737_RC | 1 | 0 | 1 | 1 | 1 | 1 |
| Contig51764_RC | 1 | 1 | 1 | 1 | 0 | 0 |
| Contig51775_RC | 1 | 0 | 1 | 0 | 1 | 0 |
| Contig51802_RC | 1 | 0 | 1 | 0 | 0 | 0 |
| Contig51821_RC | 1 | 1 | 1 | 1 | 0 | 1 |
| Contig51828_RC | 1 | 0 | 1 | 0 | 1 | 1 |
| Contig51846_RC | 1 | 1 | 1 | 1 | 0 | 1 |
| Contig51888_RC | 1 | 1 | 1 | 1 | 0 | 1 |
| Contig51933_RC | 1 | 0 | 1 | 1 | 1 | 1 |
| Contig51940_RC | 1 | 0 | 1 | 0 | 0 | 1 |
| Contig51941_RC | 1 | 1 | 1 | 0 | 0 | 1 |
| Contig51943_RC | 1 | 0 | 1 | 0 | 1 | 0 |
| Contig51953_RC | 1 | 0 | 1 | 0 | 0 | 0 |
| Contig51966_RC | 1 | 0 | 1 | 0 | 0 | 0 |
| Contig51967_RC | 1 | 1 | 1 | 1 | 0 | 1 |
| Contig51974_RC | 1 | 0 | 1 | 1 | 0 | 0 |
| Contig51981_RC | 1 | 1 | 1 | 1 | 1 | 0 |
| Contig51986_RC | 1 | 0 | 1 | 1 | 0 | 1 |
| Contig51997_RC | 1 | 0 | 1 | 0 | 0 | 1 |
| Contig52074_RC | 1 | 0 | 1 | 1 | 1 | 0 |
| Contig52082_RC | 1 | 1 | 1 | 1 | 0 | 0 |
| Contig52095_RC | 1 | 0 | 1 | 0 | 0 | 1 |
| Contig52099_RC | 1 | 0 | 1 | 0 | 1 | 0 |
| Contig52114_RC | 1 | 0 | 1 | 0 | 0 | 1 |
| Contig52137_RC | 1 | 1 | 1 | 1 | 1 | 1 |
| Contig52147_RC | 1 | 0 | 1 | 0 | 0 | 1 |
| Contig52186_RC | 1 | 0 | 1 | 1 | 1 | 1 |
| Contig52214_RC | 1 | 0 | 1 | 1 | 0 | 1 |
| Contig52220_RC | 1 | 0 | 1 | 1 | 0 | 1 |
| Contig52221_RC | 1 | 1 | 1 | 1 | 1 | 1 |
| Contig52222_RC | 1 | 0 | 1 | 0 | 0 | 1 |
| Contig52224_RC | 1 | 0 | 1 | 0 | 0 | 1 |
| Contig52296_RC | 1 | 0 | 1 | 0 | 0 | 0 |
| Contig52305_RC | 1 | 1 | 1 | 0 | 1 | 0 |
| Contig52311_RC | 1 | 1 | 1 | 1 | 1 | 0 |
| Contig52320    | 1 | 0 | 1 | 1 | 0 | 0 |
| Contig52358_RC | 0 | 0 | 0 | 0 | 0 | 1 |
| Contig52402_RC | 1 | 1 | 1 | 0 | 0 | 0 |
| Contig52405_RC | 1 | 1 | 1 | 1 | 1 | 1 |
| Contig52414_RC | 1 | 0 | 1 | 0 | 0 | 0 |
| Contig52425_RC | 1 | 0 | 1 | 1 | 0 | 0 |

|                |   |   |   |   |   |   |
|----------------|---|---|---|---|---|---|
| Contig52427_RC | 1 | 1 | 1 | 1 | 0 | 0 |
| Contig52430_RC | 1 | 0 | 1 | 1 | 0 | 0 |
| Contig52433_RC | 1 | 1 | 1 | 1 | 0 | 1 |
| Contig52441_RC | 1 | 0 | 1 | 0 | 0 | 1 |
| Contig52463_RC | 1 | 1 | 1 | 0 | 1 | 1 |
| Contig52494_RC | 1 | 0 | 1 | 0 | 1 | 0 |
| Contig52520_RC | 1 | 1 | 1 | 1 | 1 | 0 |
| Contig52525_RC | 1 | 1 | 1 | 0 | 0 | 0 |
| Contig52561_RC | 1 | 1 | 1 | 1 | 1 | 1 |
| Contig52570_RC | 1 | 0 | 1 | 1 | 0 | 1 |
| Contig52579_RC | 1 | 0 | 1 | 1 | 0 | 1 |
| Contig52593_RC | 1 | 1 | 1 | 0 | 0 | 0 |
| Contig52621_RC | 1 | 1 | 1 | 1 | 1 | 1 |
| Contig52629_RC | 1 | 0 | 1 | 1 | 0 | 1 |
| Contig52635_RC | 1 | 0 | 1 | 0 | 0 | 1 |
| Contig52639_RC | 1 | 1 | 1 | 0 | 1 | 1 |
| Contig52647_RC | 1 | 1 | 1 | 1 | 0 | 0 |
| Contig52672_RC | 1 | 0 | 1 | 1 | 0 | 0 |
| Contig52681_RC | 0 | 0 | 0 | 0 | 0 | 1 |
| Contig52684    | 1 | 0 | 1 | 0 | 0 | 1 |
| Contig52687_RC | 1 | 0 | 0 | 0 | 0 | 0 |
| Contig52705_RC | 1 | 1 | 1 | 1 | 0 | 1 |
| Contig52708_RC | 1 | 1 | 1 | 1 | 0 | 1 |
| Contig52715_RC | 1 | 1 | 1 | 1 | 1 | 1 |
| Contig5274_RC  | 1 | 0 | 1 | 0 | 0 | 0 |
| Contig52768_RC | 1 | 1 | 1 | 1 | 1 | 1 |
| Contig52770_RC | 1 | 0 | 1 | 1 | 0 | 0 |
| Contig52777_RC | 1 | 1 | 1 | 1 | 0 | 1 |
| Contig52786_RC | 1 | 0 | 1 | 1 | 1 | 1 |
| Contig52789_RC | 1 | 0 | 1 | 1 | 0 | 0 |
| Contig52814_RC | 1 | 0 | 1 | 0 | 0 | 0 |
| Contig52830_RC | 1 | 1 | 1 | 1 | 1 | 1 |
| Contig52839_RC | 1 | 0 | 1 | 0 | 0 | 1 |
| Contig52862_RC | 1 | 0 | 1 | 1 | 0 | 1 |
| Contig52881_RC | 1 | 0 | 1 | 0 | 1 | 0 |
| Contig52914_RC | 1 | 1 | 1 | 1 | 1 | 1 |
| Contig52937_RC | 0 | 0 | 0 | 0 | 0 | 1 |
| Contig52940_RC | 1 | 1 | 1 | 1 | 0 | 1 |
| Contig52957_RC | 1 | 1 | 1 | 1 | 1 | 1 |
| Contig52960_RC | 1 | 0 | 1 | 0 | 0 | 1 |
| Contig52963_RC | 1 | 1 | 1 | 1 | 0 | 1 |
| Contig52976_RC | 1 | 0 | 1 | 1 | 1 | 1 |
| Contig52981_RC | 1 | 0 | 1 | 0 | 1 | 1 |
| Contig52993_RC | 1 | 1 | 1 | 1 | 1 | 1 |
| Contig52994_RC | 0 | 0 | 0 | 0 | 0 | 1 |
| Contig53033_RC | 0 | 0 | 0 | 1 | 0 | 0 |
| Contig53038_RC | 1 | 0 | 1 | 0 | 1 | 1 |
| Contig53040_RC | 1 | 0 | 0 | 0 | 0 | 1 |
| Contig53048_RC | 1 | 0 | 1 | 1 | 1 | 0 |
| Contig53066_RC | 1 | 0 | 1 | 0 | 1 | 0 |
| Contig53080_RC | 1 | 1 | 1 | 1 | 0 | 1 |
| Contig53086_RC | 1 | 0 | 1 | 1 | 1 | 1 |

|                |   |   |   |   |   |   |
|----------------|---|---|---|---|---|---|
| Contig53126_RC | 1 | 0 | 1 | 0 | 0 | 0 |
| Contig53177_RC | 1 | 0 | 1 | 0 | 1 | 1 |
| Contig53191_RC | 1 | 1 | 1 | 1 | 1 | 1 |
| Contig53223    | 1 | 0 | 1 | 1 | 1 | 1 |
| Contig53226_RC | 1 | 1 | 1 | 1 | 1 | 1 |
| Contig53242_RC | 1 | 0 | 1 | 0 | 1 | 1 |
| Contig53260_RC | 1 | 0 | 1 | 1 | 1 | 1 |
| Contig53265_RC | 1 | 1 | 1 | 1 | 0 | 1 |
| Contig53277_RC | 1 | 1 | 1 | 1 | 0 | 0 |
| Contig53281_RC | 1 | 1 | 1 | 1 | 0 | 1 |
| Contig53286_RC | 1 | 1 | 1 | 1 | 0 | 0 |
| Contig53296_RC | 1 | 1 | 1 | 1 | 1 | 1 |
| Contig53305_RC | 1 | 0 | 1 | 0 | 0 | 1 |
| Contig53323    | 1 | 1 | 1 | 0 | 1 | 1 |
| Contig53342_RC | 1 | 1 | 1 | 1 | 1 | 1 |
| Contig53347_RC | 1 | 0 | 1 | 0 | 0 | 1 |
| Contig53364_RC | 1 | 0 | 0 | 0 | 0 | 0 |
| Contig53401_RC | 1 | 1 | 1 | 0 | 0 | 1 |
| Contig53406_RC | 1 | 0 | 1 | 1 | 0 | 1 |
| Contig53460_RC | 1 | 0 | 1 | 0 | 1 | 1 |
| Contig53471_RC | 1 | 1 | 1 | 1 | 0 | 0 |
| Contig53488    | 1 | 1 | 1 | 1 | 0 | 1 |
| Contig53502_RC | 1 | 0 | 1 | 1 | 1 | 1 |
| Contig53508_RC | 0 | 0 | 1 | 1 | 0 | 0 |
| Contig53547_RC | 1 | 0 | 1 | 0 | 0 | 0 |
| Contig53551_RC | 1 | 0 | 1 | 0 | 1 | 1 |
| Contig53555_RC | 1 | 1 | 1 | 1 | 1 | 1 |
| Contig53581_RC | 1 | 0 | 1 | 0 | 0 | 1 |
| Contig53615_RC | 1 | 1 | 1 | 1 | 0 | 1 |
| Contig53619_RC | 1 | 0 | 1 | 0 | 0 | 0 |
| Contig53623_RC | 1 | 0 | 1 | 0 | 1 | 1 |
| Contig53629_RC | 1 | 0 | 1 | 0 | 0 | 0 |
| Contig53646_RC | 1 | 1 | 1 | 1 | 1 | 1 |
| Contig53661_RC | 1 | 1 | 1 | 1 | 0 | 0 |
| Contig53667_RC | 1 | 0 | 1 | 0 | 1 | 1 |
| Contig53674_RC | 1 | 0 | 1 | 0 | 0 | 1 |
| Contig53703_RC | 1 | 0 | 1 | 1 | 0 | 0 |
| Contig53709_RC | 1 | 0 | 1 | 1 | 0 | 0 |
| Contig53713_RC | 1 | 1 | 1 | 1 | 1 | 1 |
| Contig53719_RC | 1 | 0 | 1 | 1 | 1 | 1 |
| Contig53742_RC | 1 | 1 | 1 | 1 | 0 | 1 |
| Contig53750_RC | 1 | 1 | 1 | 1 | 0 | 0 |
| Contig53757_RC | 1 | 0 | 1 | 0 | 1 | 1 |
| Contig53766_RC | 1 | 0 | 1 | 0 | 0 | 0 |
| Contig53777_RC | 1 | 1 | 1 | 1 | 1 | 1 |
| Contig53804_RC | 1 | 1 | 1 | 1 | 1 | 1 |
| Contig53819_RC | 1 | 0 | 1 | 0 | 0 | 0 |
| Contig53823_RC | 1 | 0 | 1 | 1 | 1 | 1 |
| Contig53838_RC | 0 | 0 | 0 | 1 | 0 | 0 |
| Contig5384_RC  | 1 | 0 | 1 | 0 | 1 | 1 |
| Contig53852_RC | 1 | 1 | 1 | 1 | 1 | 1 |
| Contig53870_RC | 1 | 0 | 1 | 0 | 0 | 1 |

|                |   |   |   |   |   |   |
|----------------|---|---|---|---|---|---|
| Contig53881_RC | 1 | 1 | 1 | 1 | 0 | 1 |
| Contig5392_RC  | 1 | 1 | 1 | 1 | 0 | 1 |
| Contig53952_RC | 1 | 0 | 1 | 1 | 1 | 1 |
| Contig53953_RC | 1 | 0 | 1 | 0 | 0 | 1 |
| Contig53962_RC | 1 | 0 | 1 | 1 | 1 | 1 |
| Contig53965_RC | 1 | 0 | 1 | 1 | 1 | 1 |
| Contig53969_RC | 1 | 1 | 1 | 0 | 1 | 1 |
| Contig54012_RC | 1 | 0 | 1 | 0 | 0 | 1 |
| Contig5403_RC  | 1 | 0 | 1 | 1 | 0 | 0 |
| Contig54056_RC | 1 | 1 | 1 | 1 | 0 | 1 |
| Contig54076_RC | 1 | 0 | 1 | 0 | 1 | 0 |
| Contig54110_RC | 1 | 0 | 1 | 0 | 1 | 0 |
| Contig54130_RC | 1 | 1 | 1 | 1 | 1 | 1 |
| Contig54137_RC | 1 | 0 | 1 | 1 | 1 | 1 |
| Contig54142_RC | 1 | 0 | 1 | 1 | 0 | 1 |
| Contig54159_RC | 1 | 0 | 1 | 0 | 0 | 0 |
| Contig54169_RC | 1 | 1 | 1 | 1 | 0 | 1 |
| Contig54180    | 1 | 0 | 1 | 1 | 0 | 1 |
| Contig54206_RC | 1 | 1 | 1 | 1 | 0 | 1 |
| Contig54232_RC | 1 | 0 | 1 | 1 | 1 | 1 |
| Contig54258_RC | 1 | 1 | 1 | 1 | 0 | 1 |
| Contig54259_RC | 1 | 1 | 1 | 0 | 0 | 1 |
| Contig54274_RC | 1 | 0 | 1 | 0 | 1 | 0 |
| Contig54294_RC | 1 | 0 | 1 | 1 | 0 | 0 |
| Contig54295_RC | 1 | 1 | 1 | 1 | 1 | 1 |
| Contig54300_RC | 1 | 0 | 1 | 1 | 1 | 1 |
| Contig5432_RC  | 1 | 1 | 1 | 1 | 1 | 1 |
| Contig54335_RC | 1 | 0 | 1 | 0 | 1 | 1 |
| Contig54340_RC | 1 | 0 | 1 | 0 | 1 | 0 |
| Contig54365_RC | 1 | 0 | 1 | 0 | 0 | 0 |
| Contig54391_RC | 1 | 1 | 1 | 1 | 0 | 1 |
| Contig54395_RC | 1 | 0 | 1 | 0 | 0 | 0 |
| Contig54403    | 1 | 0 | 1 | 0 | 1 | 1 |
| Contig54414_RC | 1 | 1 | 1 | 1 | 0 | 0 |
| Contig54420_RC | 1 | 0 | 1 | 0 | 1 | 1 |
| Contig54463_RC | 1 | 0 | 1 | 0 | 1 | 1 |
| Contig54491_RC | 1 | 1 | 1 | 1 | 1 | 1 |
| Contig54503_RC | 1 | 0 | 1 | 0 | 1 | 1 |
| Contig54518_RC | 1 | 0 | 1 | 0 | 0 | 0 |
| Contig54531_RC | 1 | 0 | 1 | 0 | 0 | 1 |
| Contig54534_RC | 1 | 0 | 1 | 1 | 0 | 0 |
| Contig54536    | 1 | 1 | 1 | 0 | 0 | 1 |
| Contig54540_RC | 1 | 0 | 1 | 0 | 0 | 0 |
| Contig54544_RC | 0 | 0 | 0 | 0 | 0 | 1 |
| Contig5455_RC  | 1 | 1 | 1 | 1 | 1 | 0 |
| Contig54576_RC | 1 | 1 | 1 | 1 | 0 | 0 |
| Contig54581_RC | 1 | 0 | 1 | 1 | 0 | 1 |
| Contig54650_RC | 1 | 0 | 1 | 0 | 0 | 1 |
| Contig54661_RC | 1 | 1 | 1 | 1 | 0 | 0 |
| Contig54676_RC | 1 | 1 | 1 | 1 | 1 | 1 |
| Contig54698_RC | 1 | 1 | 1 | 1 | 0 | 0 |
| Contig54716_RC | 1 | 0 | 1 | 1 | 1 | 1 |

|                |   |   |   |   |   |   |
|----------------|---|---|---|---|---|---|
| Contig54718_RC | 1 | 1 | 1 | 1 | 1 | 0 |
| Contig5471_RC  | 1 | 0 | 0 | 0 | 0 | 1 |
| Contig54726_RC | 1 | 1 | 1 | 1 | 0 | 0 |
| Contig54727_RC | 0 | 0 | 1 | 0 | 0 | 0 |
| Contig54745_RC | 1 | 1 | 1 | 1 | 0 | 0 |
| Contig54757_RC | 1 | 1 | 1 | 1 | 0 | 1 |
| Contig54758_RC | 1 | 0 | 1 | 0 | 0 | 1 |
| Contig54761_RC | 1 | 1 | 1 | 1 | 1 | 1 |
| Contig54860_RC | 1 | 0 | 1 | 1 | 1 | 1 |
| Contig54898_RC | 1 | 0 | 1 | 0 | 1 | 1 |
| Contig5489_RC  | 1 | 1 | 1 | 0 | 0 | 1 |
| Contig54907_RC | 1 | 1 | 1 | 1 | 1 | 1 |
| Contig54915_RC | 1 | 0 | 1 | 1 | 1 | 1 |
| Contig54933_RC | 1 | 0 | 1 | 1 | 1 | 1 |
| Contig54946_RC | 1 | 0 | 1 | 0 | 1 | 1 |
| Contig54961_RC | 1 | 1 | 1 | 1 | 0 | 1 |
| Contig54968_RC | 1 | 1 | 1 | 1 | 0 | 0 |
| Contig54980_RC | 1 | 1 | 1 | 0 | 0 | 1 |
| Contig54999_RC | 1 | 0 | 1 | 0 | 1 | 1 |
| Contig55022_RC | 1 | 1 | 1 | 1 | 1 | 1 |
| Contig55046_RC | 1 | 0 | 1 | 1 | 0 | 1 |
| Contig55048_RC | 1 | 0 | 1 | 0 | 0 | 0 |
| Contig55070_RC | 1 | 0 | 1 | 0 | 1 | 0 |
| Contig55114_RC | 1 | 0 | 1 | 1 | 1 | 0 |
| Contig55134_RC | 1 | 0 | 1 | 0 | 1 | 0 |
| Contig5513_RC  | 1 | 0 | 1 | 1 | 0 | 1 |
| Contig55144_RC | 1 | 0 | 1 | 0 | 0 | 1 |
| Contig55181_RC | 1 | 0 | 1 | 0 | 0 | 0 |
| Contig55193_RC | 1 | 1 | 1 | 0 | 1 | 1 |
| Contig55201_RC | 1 | 0 | 1 | 1 | 0 | 0 |
| Contig55214_RC | 1 | 0 | 1 | 1 | 1 | 1 |
| Contig55221_RC | 0 | 0 | 1 | 0 | 0 | 0 |
| Contig55228_RC | 1 | 1 | 1 | 1 | 0 | 1 |
| Contig55234_RC | 1 | 1 | 1 | 1 | 0 | 1 |
| Contig55242_RC | 1 | 0 | 1 | 0 | 0 | 0 |
| Contig55248_RC | 1 | 1 | 1 | 1 | 0 | 1 |
| Contig55263_RC | 1 | 1 | 1 | 1 | 0 | 1 |
| Contig55268_RC | 1 | 0 | 1 | 0 | 0 | 1 |
| Contig55296_RC | 1 | 0 | 1 | 0 | 0 | 1 |
| Contig55327_RC | 1 | 0 | 1 | 0 | 1 | 1 |
| Contig55332_RC | 1 | 0 | 1 | 0 | 1 | 1 |
| Contig55334_RC | 1 | 1 | 1 | 1 | 0 | 1 |
| Contig55339_RC | 1 | 0 | 1 | 0 | 1 | 0 |
| Contig55351_RC | 1 | 0 | 1 | 0 | 0 | 1 |
| Contig55446_RC | 1 | 0 | 1 | 0 | 0 | 1 |
| Contig55487_RC | 1 | 1 | 1 | 1 | 1 | 1 |
| Contig55539_RC | 1 | 1 | 1 | 1 | 1 | 0 |
| Contig55540_RC | 1 | 0 | 1 | 1 | 1 | 1 |
| Contig55542_RC | 1 | 0 | 1 | 0 | 1 | 0 |
| Contig55558_RC | 1 | 1 | 1 | 1 | 0 | 1 |
| Contig55562_RC | 1 | 0 | 1 | 0 | 0 | 1 |
| Contig5556_RC  | 1 | 0 | 1 | 0 | 0 | 1 |

|                |   |   |   |   |   |   |
|----------------|---|---|---|---|---|---|
| Contig55574_RC | 1 | 1 | 1 | 1 | 1 | 0 |
| Contig55580_RC | 1 | 0 | 1 | 0 | 1 | 1 |
| Contig55583_RC | 0 | 1 | 0 | 0 | 0 | 0 |
| Contig5559_RC  | 1 | 0 | 1 | 0 | 0 | 1 |
| Contig55625_RC | 1 | 0 | 1 | 0 | 0 | 0 |
| Contig55671_RC | 1 | 0 | 1 | 0 | 1 | 0 |
| Contig55700_RC | 1 | 1 | 1 | 1 | 0 | 1 |
| Contig55704_RC | 1 | 0 | 1 | 0 | 0 | 0 |
| Contig55709_RC | 1 | 0 | 1 | 0 | 1 | 1 |
| Contig55727_RC | 1 | 1 | 1 | 0 | 0 | 1 |
| Contig55734_RC | 1 | 0 | 1 | 1 | 1 | 1 |
| Contig55749_RC | 1 | 0 | 1 | 0 | 0 | 0 |
| Contig55759_RC | 1 | 0 | 1 | 0 | 0 | 1 |
| Contig55764_RC | 1 | 1 | 1 | 1 | 0 | 1 |
| Contig55766_RC | 1 | 0 | 1 | 1 | 1 | 0 |
| Contig55770_RC | 1 | 0 | 1 | 0 | 0 | 0 |
| Contig55785_RC | 1 | 0 | 1 | 1 | 0 | 1 |
| Contig55789_RC | 1 | 0 | 1 | 0 | 0 | 1 |
| Contig55814_RC | 1 | 1 | 1 | 1 | 0 | 0 |
| Contig55834_RC | 1 | 0 | 1 | 1 | 1 | 0 |
| Contig55883_RC | 1 | 1 | 1 | 1 | 1 | 0 |
| Contig55886_RC | 1 | 0 | 1 | 0 | 0 | 1 |
| Contig55944_RC | 1 | 0 | 1 | 0 | 1 | 1 |
| Contig55973_RC | 1 | 0 | 1 | 1 | 1 | 0 |
| Contig55984_RC | 1 | 1 | 1 | 1 | 1 | 1 |
| Contig55990_RC | 1 | 0 | 1 | 0 | 0 | 1 |
| Contig55991_RC | 1 | 0 | 1 | 0 | 1 | 1 |
| Contig55997_RC | 1 | 1 | 1 | 1 | 1 | 1 |
| Contig55_RC    | 1 | 0 | 1 | 1 | 1 | 0 |
| Contig56007_RC | 1 | 0 | 1 | 1 | 1 | 1 |
| Contig56010_RC | 1 | 1 | 1 | 0 | 0 | 1 |
| Contig56026_RC | 1 | 1 | 1 | 1 | 1 | 1 |
| Contig56030_RC | 1 | 1 | 1 | 1 | 0 | 1 |
| Contig56036_RC | 1 | 0 | 1 | 1 | 1 | 1 |
| Contig56093_RC | 1 | 0 | 1 | 0 | 1 | 0 |
| Contig56096    | 1 | 0 | 1 | 1 | 0 | 1 |
| Contig56099_RC | 1 | 0 | 1 | 0 | 0 | 1 |
| Contig56154_RC | 1 | 0 | 1 | 0 | 0 | 0 |
| Contig56160_RC | 1 | 1 | 1 | 1 | 1 | 1 |
| Contig5621_RC  | 1 | 0 | 1 | 0 | 0 | 1 |
| Contig56229    | 1 | 0 | 1 | 1 | 1 | 1 |
| Contig56257_RC | 1 | 0 | 1 | 0 | 0 | 1 |
| Contig56261_RC | 1 | 1 | 1 | 1 | 1 | 0 |
| Contig56262_RC | 1 | 0 | 1 | 1 | 1 | 0 |
| Contig56270_RC | 1 | 1 | 1 | 1 | 1 | 1 |
| Contig56276_RC | 1 | 0 | 1 | 0 | 1 | 1 |
| Contig56288_RC | 1 | 0 | 1 | 1 | 1 | 1 |
| Contig56303_RC | 1 | 0 | 1 | 1 | 0 | 1 |
| Contig56338_RC | 1 | 0 | 1 | 0 | 0 | 1 |
| Contig5636_RC  | 0 | 0 | 1 | 0 | 0 | 0 |
| Contig56422_RC | 1 | 0 | 0 | 0 | 0 | 1 |
| Contig56434_RC | 0 | 0 | 1 | 0 | 0 | 0 |

|                |   |   |   |   |   |   |
|----------------|---|---|---|---|---|---|
| Contig56469_RC | 1 | 1 | 1 | 1 | 1 | 1 |
| Contig56513_RC | 1 | 0 | 0 | 0 | 0 | 1 |
| Contig56518_RC | 1 | 0 | 1 | 1 | 0 | 0 |
| Contig56541_RC | 1 | 1 | 1 | 1 | 0 | 1 |
| Contig56583_RC | 1 | 1 | 1 | 1 | 1 | 1 |
| Contig565_RC   | 1 | 0 | 1 | 0 | 0 | 0 |
| Contig56611_RC | 1 | 0 | 1 | 0 | 0 | 1 |
| Contig56619    | 1 | 0 | 1 | 1 | 1 | 1 |
| Contig56670_RC | 1 | 1 | 1 | 1 | 0 | 1 |
| Contig56678_RC | 0 | 0 | 0 | 0 | 0 | 1 |
| Contig56689_RC | 1 | 1 | 1 | 1 | 1 | 1 |
| Contig56699_RC | 1 | 0 | 1 | 0 | 0 | 0 |
| Contig56735_RC | 1 | 0 | 1 | 1 | 1 | 1 |
| Contig56768_RC | 1 | 1 | 1 | 1 | 0 | 0 |
| Contig56777_RC | 1 | 1 | 1 | 1 | 0 | 1 |
| Contig56848_RC | 1 | 0 | 1 | 0 | 0 | 1 |
| Contig56857_RC | 1 | 1 | 1 | 0 | 0 | 0 |
| Contig56888_RC | 1 | 0 | 1 | 0 | 1 | 0 |
| Contig56959_RC | 1 | 1 | 1 | 0 | 0 | 1 |
| Contig569_RC   | 1 | 1 | 1 | 1 | 1 | 1 |
| Contig57034_RC | 1 | 1 | 1 | 1 | 0 | 1 |
| Contig57036_RC | 1 | 1 | 1 | 1 | 0 | 1 |
| Contig57056_RC | 1 | 0 | 1 | 0 | 1 | 0 |
| Contig57080_RC | 1 | 0 | 1 | 0 | 1 | 1 |
| Contig57081_RC | 1 | 1 | 1 | 1 | 1 | 1 |
| Contig57090_RC | 1 | 1 | 1 | 1 | 1 | 1 |
| Contig57091_RC | 1 | 0 | 1 | 1 | 0 | 0 |
| Contig57101_RC | 1 | 0 | 1 | 0 | 1 | 1 |
| Contig57142_RC | 1 | 0 | 1 | 1 | 0 | 0 |
| Contig5716_RC  | 1 | 1 | 1 | 1 | 0 | 0 |
| Contig57172_RC | 1 | 0 | 1 | 0 | 1 | 1 |
| Contig57174_RC | 1 | 1 | 1 | 1 | 0 | 1 |
| Contig57201_RC | 1 | 1 | 1 | 1 | 1 | 0 |
| Contig57222_RC | 1 | 0 | 1 | 0 | 0 | 1 |
| Contig57226_RC | 1 | 0 | 1 | 0 | 0 | 0 |
| Contig57230_RC | 1 | 0 | 1 | 0 | 0 | 1 |
| Contig57231_RC | 1 | 1 | 1 | 1 | 0 | 1 |
| Contig57239_RC | 1 | 1 | 1 | 1 | 0 | 1 |
| Contig57270_RC | 1 | 0 | 1 | 1 | 1 | 0 |
| Contig57290_RC | 1 | 0 | 1 | 1 | 0 | 1 |
| Contig57330_RC | 1 | 0 | 1 | 0 | 0 | 1 |
| Contig57359_RC | 1 | 0 | 1 | 0 | 0 | 0 |
| Contig57398_RC | 1 | 1 | 1 | 1 | 0 | 0 |
| Contig57418_RC | 1 | 0 | 1 | 0 | 0 | 0 |
| Contig57419_RC | 1 | 1 | 1 | 1 | 1 | 1 |
| Contig57421_RC | 1 | 0 | 1 | 1 | 1 | 1 |
| Contig57438_RC | 1 | 1 | 1 | 0 | 1 | 1 |
| Contig57441_RC | 1 | 0 | 1 | 0 | 1 | 0 |
| Contig57480_RC | 1 | 0 | 1 | 1 | 1 | 1 |
| Contig57494_RC | 1 | 0 | 1 | 1 | 0 | 0 |
| Contig57496_RC | 1 | 0 | 1 | 0 | 0 | 0 |
| Contig57562_RC | 1 | 0 | 1 | 1 | 0 | 1 |



|                |   |   |   |   |   |   |
|----------------|---|---|---|---|---|---|
| Contig57582_RC | 1 | 1 | 1 | 1 | 1 | 1 |
| Contig57586_RC | 1 | 0 | 1 | 1 | 0 | 1 |
| Contig57595    | 1 | 0 | 1 | 0 | 0 | 0 |
| Contig575_RC   | 1 | 0 | 1 | 0 | 0 | 0 |
| Contig57644_RC | 1 | 0 | 1 | 0 | 0 | 1 |
| Contig57645_RC | 1 | 1 | 1 | 1 | 1 | 1 |
| Contig57662_RC | 1 | 1 | 1 | 1 | 0 | 0 |
| Contig57694_RC | 1 | 0 | 1 | 1 | 1 | 1 |
| Contig57726_RC | 1 | 1 | 1 | 1 | 0 | 0 |
| Contig57822_RC | 1 | 0 | 1 | 1 | 1 | 1 |
| Contig57840_RC | 1 | 1 | 1 | 1 | 0 | 1 |
| Contig57864_RC | 1 | 1 | 1 | 1 | 0 | 0 |
| Contig57877_RC | 1 | 0 | 1 | 0 | 1 | 0 |
| Contig57896_RC | 1 | 1 | 1 | 1 | 1 | 1 |
| Contig57903_RC | 1 | 1 | 1 | 1 | 0 | 1 |
| Contig57908_RC | 1 | 0 | 1 | 1 | 0 | 0 |
| Contig57957_RC | 1 | 0 | 1 | 0 | 0 | 0 |
| Contig58029_RC | 1 | 1 | 1 | 1 | 1 | 0 |
| Contig58042_RC | 1 | 1 | 1 | 1 | 1 | 1 |
| Contig58064_RC | 1 | 1 | 1 | 1 | 0 | 1 |
| Contig58107_RC | 1 | 1 | 1 | 0 | 1 | 1 |
| Contig58121_RC | 1 | 0 | 1 | 1 | 1 | 1 |
| Contig58145_RC | 1 | 1 | 1 | 1 | 1 | 1 |
| Contig58182_RC | 1 | 0 | 1 | 1 | 1 | 1 |
| Contig58193_RC | 1 | 1 | 1 | 1 | 1 | 1 |
| Contig58214_RC | 1 | 0 | 1 | 0 | 0 | 0 |
| Contig58236_RC | 1 | 0 | 1 | 1 | 1 | 1 |
| Contig58239_RC | 1 | 1 | 1 | 1 | 0 | 1 |
| Contig58275_RC | 1 | 0 | 1 | 0 | 1 | 1 |
| Contig58279_RC | 1 | 1 | 1 | 1 | 0 | 1 |
| Contig58322_RC | 1 | 0 | 1 | 0 | 0 | 1 |
| Contig58333    | 1 | 0 | 1 | 0 | 1 | 1 |
| Contig58339_RC | 1 | 0 | 1 | 0 | 1 | 1 |
| Contig58353_RC | 1 | 0 | 1 | 1 | 1 | 1 |
| Contig58397_RC | 1 | 1 | 1 | 1 | 1 | 1 |
| Contig58430_RC | 1 | 0 | 1 | 0 | 0 | 0 |
| Contig58446_RC | 1 | 0 | 0 | 0 | 0 | 1 |
| Contig58471_RC | 1 | 1 | 1 | 1 | 0 | 1 |
| Contig58475_RC | 1 | 0 | 0 | 0 | 0 | 1 |
| Contig58491_RC | 1 | 0 | 1 | 0 | 0 | 1 |
| Contig58514_RC | 1 | 0 | 1 | 1 | 0 | 0 |
| Contig58637_RC | 1 | 0 | 1 | 1 | 1 | 1 |
| Contig58966_RC | 1 | 0 | 1 | 1 | 1 | 1 |
| Contig59080    | 1 | 0 | 1 | 1 | 0 | 0 |
| Contig59090_RC | 1 | 1 | 1 | 1 | 0 | 1 |
| Contig59127_RC | 1 | 0 | 1 | 0 | 1 | 1 |
| Contig59210_RC | 1 | 0 | 1 | 0 | 1 | 0 |
| Contig59481_RC | 1 | 0 | 1 | 1 | 1 | 1 |
| Contig5954_RC  | 1 | 0 | 1 | 0 | 1 | 0 |
| Contig59612_RC | 1 | 0 | 1 | 0 | 0 | 0 |
| Contig598_RC   | 1 | 0 | 1 | 0 | 0 | 0 |
| Contig6013_RC  | 1 | 0 | 1 | 0 | 0 | 0 |

|                |   |   |   |   |   |   |
|----------------|---|---|---|---|---|---|
| Contig60150_RC | 1 | 0 | 1 | 0 | 0 | 0 |
| Contig60157_RC | 1 | 0 | 1 | 0 | 0 | 0 |
| Contig60194_RC | 1 | 0 | 1 | 1 | 0 | 1 |
| Contig60301_RC | 1 | 0 | 1 | 0 | 1 | 1 |
| Contig60553    | 0 | 0 | 0 | 0 | 0 | 1 |
| Contig6064_RC  | 1 | 0 | 1 | 0 | 0 | 1 |
| Contig60864_RC | 1 | 0 | 1 | 0 | 1 | 1 |
| Contig60981_RC | 1 | 1 | 1 | 1 | 0 | 1 |
| Contig61139_RC | 1 | 1 | 1 | 1 | 1 | 1 |
| Contig61113_RC | 1 | 0 | 1 | 0 | 0 | 1 |
| Contig61229_RC | 1 | 0 | 1 | 0 | 0 | 0 |
| Contig61254_RC | 1 | 0 | 1 | 0 | 1 | 1 |
| Contig61265_RC | 1 | 0 | 1 | 0 | 0 | 0 |
| Contig61320_RC | 1 | 0 | 1 | 0 | 0 | 1 |
| Contig61325    | 1 | 0 | 1 | 1 | 1 | 1 |
| Contig6146_RC  | 1 | 0 | 1 | 0 | 0 | 1 |
| Contig6164_RC  | 1 | 0 | 1 | 0 | 0 | 1 |
| Contig6167_RC  | 1 | 1 | 1 | 1 | 0 | 1 |
| Contig61770_RC | 1 | 1 | 1 | 1 | 0 | 1 |
| Contig61815    | 1 | 0 | 1 | 0 | 1 | 0 |
| Contig61824_RC | 1 | 1 | 1 | 0 | 1 | 0 |
| Contig61848_RC | 1 | 1 | 1 | 1 | 1 | 1 |
| Contig6200_RC  | 1 | 1 | 0 | 0 | 0 | 0 |
| Contig62149_RC | 1 | 1 | 1 | 1 | 1 | 1 |
| Contig6238_RC  | 1 | 0 | 1 | 0 | 0 | 1 |
| Contig62588_RC | 1 | 1 | 1 | 1 | 1 | 1 |
| Contig62675_RC | 1 | 0 | 1 | 1 | 0 | 1 |
| Contig6270_RC  | 1 | 1 | 1 | 1 | 1 | 1 |
| Contig6273_RC  | 1 | 1 | 1 | 1 | 1 | 1 |
| Contig62901_RC | 1 | 0 | 1 | 0 | 0 | 0 |
| Contig62923_RC | 1 | 0 | 1 | 0 | 0 | 0 |
| Contig62964_RC | 1 | 0 | 1 | 0 | 0 | 0 |
| Contig63026    | 1 | 1 | 1 | 1 | 1 | 0 |
| Contig63036    | 1 | 0 | 1 | 1 | 1 | 1 |
| Contig63171_RC | 1 | 1 | 1 | 1 | 0 | 1 |
| Contig6323_RC  | 1 | 1 | 1 | 1 | 0 | 1 |
| Contig63300_RC | 1 | 0 | 1 | 0 | 0 | 1 |
| Contig63302_RC | 1 | 1 | 1 | 1 | 0 | 1 |
| Contig63304    | 1 | 0 | 1 | 0 | 1 | 0 |
| Contig6333_RC  | 1 | 0 | 1 | 1 | 0 | 1 |
| Contig6352_RC  | 1 | 1 | 1 | 1 | 0 | 1 |
| Contig63566_RC | 1 | 0 | 1 | 0 | 0 | 1 |
| Contig63625_RC | 1 | 0 | 1 | 0 | 0 | 0 |
| Contig63649_RC | 1 | 1 | 1 | 0 | 0 | 0 |
| Contig63683_RC | 1 | 1 | 1 | 0 | 1 | 1 |
| Contig63748_RC | 1 | 0 | 0 | 0 | 0 | 0 |
| Contig63754_RC | 0 | 0 | 0 | 0 | 0 | 1 |
| Contig63811_RC | 1 | 0 | 1 | 1 | 1 | 1 |
| Contig6382_RC  | 1 | 1 | 1 | 1 | 0 | 1 |
| Contig64477    | 1 | 1 | 1 | 1 | 0 | 0 |
| Contig64502    | 1 | 0 | 1 | 1 | 1 | 1 |
| Contig64539_RC | 1 | 1 | 1 | 1 | 1 | 1 |

|                |   |   |   |   |   |   |
|----------------|---|---|---|---|---|---|
| Contig6456_RC  | 1 | 0 | 1 | 0 | 0 | 1 |
| Contig64775_RC | 1 | 1 | 1 | 1 | 0 | 1 |
| Contig64828_RC | 1 | 1 | 1 | 1 | 0 | 1 |
| Contig6498     | 1 | 1 | 1 | 1 | 0 | 0 |
| Contig64_RC    | 1 | 1 | 1 | 1 | 0 | 1 |
| Contig6514_RC  | 1 | 1 | 1 | 1 | 1 | 1 |
| Contig65156_RC | 1 | 0 | 1 | 0 | 0 | 0 |
| Contig65227    | 1 | 0 | 1 | 0 | 1 | 1 |
| Contig6529_RC  | 1 | 0 | 1 | 0 | 0 | 1 |
| Contig65300_RC | 1 | 1 | 1 | 1 | 1 | 1 |
| Contig65401_RC | 1 | 1 | 1 | 1 | 0 | 0 |
| Contig65459_RC | 1 | 0 | 1 | 1 | 0 | 0 |
| Contig65600_RC | 1 | 0 | 1 | 0 | 0 | 1 |
| Contig6568_RC  | 1 | 0 | 1 | 1 | 1 | 1 |
| Contig65934_RC | 1 | 0 | 1 | 1 | 0 | 0 |
| Contig65966_RC | 1 | 1 | 1 | 1 | 0 | 0 |
| Contig659_RC   | 1 | 1 | 1 | 1 | 1 | 0 |
| Contig66028_RC | 1 | 1 | 1 | 1 | 0 | 1 |
| Contig66072    | 1 | 0 | 1 | 1 | 1 | 1 |
| Contig6610_RC  | 1 | 0 | 1 | 0 | 0 | 1 |
| Contig6615_RC  | 0 | 0 | 0 | 0 | 0 | 1 |
| Contig6641_RC  | 1 | 0 | 1 | 1 | 1 | 1 |
| Contig6654_RC  | 1 | 0 | 1 | 0 | 0 | 0 |
| Contig66573_RC | 1 | 1 | 1 | 1 | 1 | 1 |
| Contig66615_RC | 1 | 0 | 1 | 0 | 0 | 0 |
| Contig66632_RC | 1 | 0 | 1 | 1 | 1 | 1 |
| Contig667_RC   | 1 | 1 | 1 | 1 | 0 | 0 |
| Contig66868_RC | 1 | 0 | 1 | 1 | 1 | 1 |
| Contig66916_RC | 1 | 0 | 1 | 0 | 0 | 1 |
| Contig67169_RC | 1 | 0 | 1 | 0 | 1 | 1 |
| Contig67174_RC | 1 | 0 | 1 | 0 | 0 | 1 |
| Contig6719_RC  | 1 | 0 | 1 | 1 | 0 | 0 |
| Contig67230_RC | 1 | 0 | 1 | 1 | 1 | 1 |
| Contig67249_RC | 1 | 1 | 1 | 1 | 0 | 1 |
| Contig6742_RC  | 1 | 1 | 1 | 1 | 0 | 0 |
| Contig678_RC   | 1 | 1 | 1 | 1 | 1 | 1 |
| Contig6832_RC  | 1 | 0 | 1 | 0 | 0 | 1 |
| Contig684_RC   | 1 | 0 | 1 | 0 | 0 | 0 |
| Contig6882     | 1 | 1 | 1 | 1 | 0 | 0 |
| Contig688_RC   | 1 | 0 | 1 | 1 | 0 | 1 |
| Contig693_RC   | 1 | 0 | 1 | 0 | 0 | 1 |
| Contig706_RC   | 0 | 0 | 1 | 0 | 0 | 0 |
| Contig718_RC   | 1 | 1 | 1 | 1 | 1 | 1 |
| Contig719_RC   | 1 | 0 | 1 | 1 | 0 | 1 |
| Contig7245_RC  | 1 | 1 | 1 | 0 | 0 | 1 |
| Contig729_RC   | 1 | 1 | 1 | 0 | 1 | 1 |
| Contig7412_RC  | 1 | 0 | 1 | 0 | 0 | 1 |
| Contig7415_RC  | 1 | 0 | 1 | 0 | 0 | 0 |
| Contig7457     | 1 | 0 | 0 | 0 | 0 | 0 |
| Contig749_RC   | 1 | 0 | 1 | 0 | 1 | 1 |
| Contig753_RC   | 1 | 1 | 1 | 1 | 1 | 1 |
| Contig7545_RC  | 1 | 0 | 0 | 0 | 0 | 1 |

|               |   |   |   |   |   |   |
|---------------|---|---|---|---|---|---|
| Contig75_RC   | 1 | 1 | 1 | 1 | 0 | 1 |
| Contig760_RC  | 1 | 1 | 1 | 1 | 1 | 1 |
| Contig773     | 1 | 0 | 1 | 1 | 0 | 0 |
| Contig784_RC  | 1 | 0 | 1 | 1 | 1 | 1 |
| Contig78_RC   | 1 | 0 | 1 | 1 | 0 | 1 |
| Contig7974_RC | 1 | 0 | 1 | 1 | 0 | 0 |
| Contig8125_RC | 1 | 1 | 1 | 1 | 0 | 0 |
| Contig8165_RC | 1 | 0 | 1 | 0 | 0 | 1 |
| Contig819_RC  | 1 | 0 | 1 | 0 | 1 | 1 |
| Contig81_RC   | 1 | 1 | 1 | 1 | 0 | 0 |
| Contig8223_RC | 1 | 0 | 0 | 0 | 0 | 1 |
| Contig8371_RC | 1 | 0 | 1 | 0 | 0 | 0 |
| Contig842_RC  | 1 | 1 | 1 | 1 | 1 | 1 |
| Contig8451_RC | 1 | 0 | 1 | 0 | 0 | 1 |
| Contig8463_RC | 1 | 1 | 1 | 1 | 0 | 0 |
| Contig8533_RC | 1 | 0 | 1 | 1 | 0 | 1 |
| Contig8570_RC | 1 | 0 | 1 | 0 | 0 | 0 |
| Contig8581_RC | 1 | 1 | 1 | 1 | 0 | 1 |
| Contig8597_RC | 1 | 1 | 1 | 1 | 0 | 0 |
| Contig8660_RC | 1 | 0 | 1 | 1 | 1 | 1 |
| Contig8670_RC | 1 | 0 | 1 | 0 | 0 | 0 |
| Contig8685_RC | 1 | 1 | 1 | 1 | 0 | 1 |
| Contig8725_RC | 1 | 0 | 1 | 0 | 0 | 0 |
| Contig873_RC  | 1 | 1 | 1 | 1 | 0 | 1 |
| Contig8778_RC | 1 | 1 | 1 | 0 | 0 | 1 |
| Contig878_RC  | 1 | 0 | 1 | 1 | 0 | 1 |
| Contig885_RC  | 1 | 1 | 1 | 1 | 0 | 0 |
| Contig8861_RC | 1 | 1 | 1 | 1 | 0 | 0 |
| Contig8885_RC | 1 | 0 | 1 | 1 | 1 | 1 |
| Contig8888_RC | 1 | 0 | 1 | 0 | 1 | 1 |
| Contig8894_RC | 1 | 0 | 0 | 0 | 0 | 0 |
| Contig8895_RC | 0 | 1 | 0 | 0 | 0 | 0 |
| Contig8909_RC | 1 | 1 | 1 | 1 | 0 | 0 |
| Contig8926_RC | 0 | 0 | 0 | 0 | 0 | 1 |
| Contig8963_RC | 1 | 0 | 1 | 1 | 0 | 0 |
| Contig8977_RC | 1 | 1 | 1 | 1 | 1 | 1 |
| Contig8985_RC | 1 | 0 | 1 | 1 | 0 | 1 |
| Contig8986_RC | 1 | 0 | 1 | 0 | 1 | 1 |
| Contig9030_RC | 1 | 0 | 1 | 1 | 0 | 0 |
| Contig9042_RC | 1 | 0 | 1 | 0 | 0 | 1 |
| Contig9053_RC | 1 | 0 | 1 | 0 | 0 | 0 |
| Contig9136_RC | 1 | 1 | 1 | 1 | 0 | 0 |
| Contig9227    | 1 | 0 | 1 | 0 | 0 | 0 |
| Contig9229    | 1 | 0 | 1 | 0 | 0 | 0 |
| Contig924_RC  | 1 | 1 | 1 | 1 | 1 | 1 |
| Contig9310    | 1 | 0 | 1 | 0 | 0 | 0 |
| Contig9348_RC | 1 | 1 | 1 | 0 | 0 | 0 |
| Contig9369_RC | 1 | 0 | 1 | 0 | 0 | 0 |
| Contig9370_RC | 1 | 0 | 0 | 0 | 0 | 1 |
| Contig9380_RC | 1 | 0 | 1 | 1 | 0 | 0 |
| Contig9514_RC | 1 | 0 | 1 | 0 | 0 | 1 |
| Contig9555_RC | 1 | 0 | 1 | 0 | 1 | 0 |

|               |   |   |   |   |   |   |
|---------------|---|---|---|---|---|---|
| Contig9714_RC | 1 | 0 | 1 | 0 | 1 | 1 |
| Contig9755_RC | 1 | 0 | 1 | 0 | 0 | 1 |
| Contig9770_RC | 1 | 0 | 1 | 0 | 0 | 0 |
| Contig9780_RC | 1 | 0 | 1 | 0 | 0 | 1 |
| Contig9813_RC | 1 | 0 | 1 | 0 | 0 | 0 |
| Contig9815_RC | 1 | 1 | 1 | 1 | 1 | 1 |
| Contig98_RC   | 1 | 1 | 1 | 0 | 1 | 1 |
| Contig9904_RC | 1 | 0 | 1 | 0 | 1 | 0 |
| Contig9938_RC | 1 | 0 | 1 | 0 | 0 | 1 |
| Contig9990_RC | 1 | 0 | 1 | 0 | 0 | 1 |
| D16967        | 1 | 0 | 1 | 1 | 1 | 1 |
| D17042        | 1 | 0 | 1 | 0 | 1 | 0 |
| D17076        | 1 | 0 | 1 | 1 | 1 | 1 |
| D17093        | 1 | 1 | 1 | 1 | 0 | 1 |
| D25274        | 1 | 1 | 1 | 1 | 0 | 1 |
| D26067        | 1 | 0 | 1 | 1 | 1 | 1 |
| D26488        | 1 | 1 | 1 | 1 | 0 | 1 |
| D29954        | 1 | 0 | 1 | 0 | 1 | 1 |
| D31886        | 1 | 0 | 1 | 0 | 0 | 0 |
| D31887        | 1 | 1 | 1 | 0 | 0 | 1 |
| D38437        | 1 | 0 | 1 | 0 | 1 | 0 |
| D38503        | 0 | 0 | 0 | 0 | 0 | 1 |
| D38521        | 1 | 1 | 1 | 0 | 1 | 1 |
| D42043        | 1 | 0 | 1 | 1 | 1 | 1 |
| D42046        | 1 | 0 | 1 | 0 | 0 | 1 |
| D42055        | 1 | 0 | 1 | 0 | 0 | 1 |
| D49356        | 1 | 0 | 1 | 0 | 0 | 1 |
| D50911        | 1 | 0 | 1 | 0 | 1 | 1 |
| D63134        | 1 | 0 | 1 | 0 | 0 | 1 |
| D63477        | 1 | 0 | 1 | 0 | 0 | 1 |
| D79991        | 1 | 0 | 1 | 1 | 0 | 0 |
| D79998        | 1 | 0 | 1 | 0 | 0 | 0 |
| D80001        | 1 | 0 | 1 | 1 | 0 | 1 |
| D80004        | 1 | 0 | 1 | 0 | 1 | 0 |
| D80007        | 1 | 1 | 1 | 1 | 0 | 1 |
| D80008        | 0 | 0 | 0 | 0 | 0 | 1 |
| D83776        | 1 | 0 | 1 | 0 | 1 | 1 |
| D83781        | 1 | 0 | 1 | 1 | 0 | 1 |
| D86957        | 1 | 0 | 1 | 0 | 0 | 1 |
| D86971        | 1 | 1 | 1 | 1 | 0 | 1 |
| D86973        | 1 | 0 | 1 | 0 | 0 | 1 |
| D86978        | 1 | 0 | 1 | 1 | 0 | 0 |
| D86980        | 1 | 0 | 1 | 0 | 0 | 1 |
| D86982        | 1 | 1 | 1 | 1 | 0 | 1 |
| D86985        | 1 | 1 | 1 | 1 | 0 | 1 |
| D87077        | 1 | 0 | 1 | 0 | 0 | 1 |
| D87438        | 1 | 1 | 1 | 1 | 0 | 0 |
| D87445        | 1 | 0 | 1 | 0 | 0 | 0 |
| D87446        | 1 | 0 | 1 | 0 | 0 | 0 |
| D87450        | 1 | 0 | 1 | 0 | 0 | 1 |
| D87454        | 1 | 0 | 1 | 0 | 1 | 1 |
| D87470        | 1 | 0 | 1 | 0 | 1 | 0 |

|                 |   |   |   |   |   |   |
|-----------------|---|---|---|---|---|---|
| D87682          | 1 | 0 | 1 | 1 | 0 | 0 |
| ENST00000014313 | 1 | 1 | 1 | 1 | 1 | 1 |
| ENST00000055264 | 1 | 0 | 1 | 1 | 1 | 1 |
| ENST00000078131 | 1 | 0 | 1 | 1 | 1 | 1 |
| ENST00000191063 | 1 | 0 | 1 | 1 | 1 | 1 |
| ENST00000201961 | 1 | 0 | 1 | 1 | 0 | 0 |
| ENST00000215119 | 1 | 0 | 1 | 0 | 0 | 1 |
| ENST00000216209 | 1 | 1 | 1 | 0 | 0 | 0 |
| ENST00000216471 | 1 | 0 | 0 | 0 | 0 | 0 |
| ENST00000217111 | 1 | 1 | 1 | 0 | 0 | 1 |
| ENST00000217222 | 1 | 0 | 1 | 0 | 0 | 1 |
| ENST00000217299 | 1 | 0 | 1 | 0 | 0 | 0 |
| ENST00000217926 | 1 | 0 | 1 | 0 | 0 | 1 |
| ENST00000218091 | 1 | 0 | 1 | 0 | 0 | 0 |
| ENST00000218100 | 1 | 0 | 1 | 1 | 0 | 0 |
| ENST00000218188 | 1 | 0 | 1 | 0 | 0 | 0 |
| ENST00000218436 | 1 | 0 | 1 | 0 | 0 | 0 |
| ENST00000219837 | 1 | 0 | 1 | 0 | 0 | 0 |
| ENST00000221796 | 1 | 1 | 1 | 1 | 0 | 1 |
| ENST00000224199 | 1 | 0 | 1 | 0 | 0 | 0 |
| ENST00000226490 | 1 | 0 | 1 | 0 | 1 | 1 |
| ENST00000228567 | 1 | 0 | 1 | 0 | 0 | 0 |
| ENST00000229384 | 1 | 0 | 1 | 0 | 0 | 0 |
| ENST00000229447 | 0 | 1 | 0 | 0 | 0 | 1 |
| ENST00000229554 | 1 | 0 | 1 | 0 | 0 | 0 |
| ENST00000229573 | 1 | 0 | 1 | 0 | 1 | 1 |
| ENST00000229699 | 1 | 0 | 1 | 0 | 0 | 0 |
| ENST00000229824 | 1 | 1 | 1 | 1 | 1 | 1 |
| ENST00000229913 | 1 | 0 | 1 | 1 | 0 | 0 |
| ENST00000236199 | 1 | 1 | 1 | 1 | 1 | 1 |
| ENST00000236678 | 1 | 1 | 1 | 1 | 0 | 0 |
| ENST00000237261 | 1 | 0 | 1 | 0 | 0 | 1 |
| ENST00000237536 | 1 | 0 | 1 | 0 | 0 | 0 |
| ENST00000237840 | 1 | 0 | 1 | 1 | 1 | 1 |
| ENST00000238047 | 1 | 1 | 1 | 1 | 1 | 1 |
| ENST00000238062 | 1 | 1 | 1 | 1 | 0 | 1 |
| ENST00000238448 | 1 | 0 | 1 | 1 | 1 | 1 |
| ENST00000238571 | 1 | 1 | 1 | 1 | 0 | 0 |
| ENST00000238708 | 1 | 0 | 1 | 1 | 1 | 1 |
| ENST00000238803 | 1 | 1 | 1 | 0 | 1 | 1 |
| ENST00000238837 | 1 | 0 | 1 | 1 | 1 | 1 |
| ENST00000239121 | 1 | 0 | 1 | 0 | 0 | 1 |
| ENST00000239490 | 1 | 1 | 1 | 1 | 1 | 1 |
| ENST00000239532 | 1 | 1 | 1 | 1 | 1 | 1 |
| ENST00000239860 | 1 | 0 | 1 | 0 | 0 | 0 |
| ENST00000239975 | 1 | 0 | 1 | 1 | 1 | 1 |
| ENST00000240403 | 1 | 0 | 1 | 1 | 0 | 0 |
| ENST00000240700 | 1 | 0 | 1 | 0 | 0 | 0 |
| ENST00000240820 | 1 | 0 | 1 | 1 | 0 | 1 |
| ENST00000241463 | 0 | 0 | 1 | 0 | 0 | 0 |
| ENST00000242140 | 1 | 1 | 1 | 1 | 0 | 1 |
| ENST00000242429 | 1 | 1 | 1 | 1 | 1 | 1 |

|                 |   |   |   |   |   |   |
|-----------------|---|---|---|---|---|---|
| ENST00000242755 | 1 | 0 | 1 | 0 | 1 | 0 |
| ENST00000242916 | 1 | 0 | 1 | 0 | 1 | 1 |
| ENST00000243927 | 1 | 0 | 1 | 1 | 0 | 0 |
| ENST00000244032 | 1 | 0 | 1 | 0 | 0 | 1 |
| ENST00000244139 | 1 | 1 | 1 | 1 | 1 | 1 |
| ENST00000244623 | 1 | 0 | 1 | 0 | 0 | 1 |
| ENST00000244644 | 1 | 0 | 1 | 1 | 0 | 0 |
| ENST00000244722 | 1 | 0 | 1 | 0 | 0 | 1 |
| ENST00000244754 | 1 | 0 | 1 | 0 | 0 | 0 |
| ENST00000244841 | 1 | 0 | 1 | 0 | 0 | 1 |
| ENST00000245227 | 1 | 1 | 1 | 1 | 0 | 0 |
| ENST00000245453 | 1 | 1 | 1 | 1 | 1 | 1 |
| ENST00000245662 | 1 | 0 | 1 | 0 | 0 | 1 |
| ENST00000245673 | 1 | 0 | 1 | 0 | 0 | 1 |
| ENST00000246000 | 1 | 1 | 1 | 1 | 1 | 0 |
| ENST00000246104 | 1 | 0 | 1 | 0 | 0 | 0 |
| ENST00000246352 | 1 | 0 | 1 | 1 | 0 | 0 |
| ENST00000246930 | 1 | 0 | 1 | 0 | 0 | 1 |
| ENST00000247084 | 1 | 0 | 1 | 1 | 0 | 0 |
| ENST00000247196 | 1 | 0 | 1 | 1 | 0 | 0 |
| ENST00000247219 | 0 | 0 | 0 | 0 | 0 | 1 |
| ENST00000247459 | 1 | 0 | 1 | 1 | 1 | 1 |
| ENST00000247550 | 1 | 0 | 1 | 0 | 0 | 0 |
| ENST00000247635 | 1 | 1 | 1 | 0 | 0 | 0 |
| ENST00000247904 | 1 | 1 | 1 | 1 | 1 | 1 |
| ENST00000248344 | 1 | 0 | 1 | 0 | 0 | 0 |
| ENST00000248346 | 1 | 0 | 1 | 0 | 0 | 0 |
| ENST00000248652 | 1 | 0 | 1 | 1 | 1 | 1 |
| ENST00000248851 | 1 | 1 | 1 | 0 | 0 | 0 |
| ENST00000249712 | 1 | 0 | 1 | 1 | 1 | 1 |
| ENST00000250621 | 1 | 0 | 1 | 0 | 0 | 0 |
| ENST00000250979 | 1 | 0 | 1 | 1 | 1 | 0 |
| ENST00000252296 | 1 | 0 | 1 | 1 | 0 | 0 |
| ENST00000253016 | 1 | 1 | 1 | 1 | 1 | 1 |
| ENST00000253064 | 1 | 1 | 0 | 0 | 0 | 0 |
| ENST00000253129 | 1 | 0 | 1 | 1 | 1 | 1 |
| ENST00000253272 | 1 | 1 | 1 | 1 | 1 | 1 |
| ENST00000253874 | 1 | 1 | 1 | 1 | 0 | 0 |
| ENST00000254279 | 1 | 1 | 1 | 1 | 0 | 1 |
| ENST00000254627 | 1 | 0 | 1 | 1 | 0 | 1 |
| ENST00000254720 | 1 | 0 | 1 | 0 | 0 | 0 |
| ENST00000254747 | 1 | 0 | 1 | 1 | 0 | 1 |
| ENST00000255145 | 1 | 0 | 1 | 0 | 0 | 0 |
| ENST00000255741 | 1 | 0 | 1 | 0 | 0 | 0 |
| ENST00000255779 | 1 | 0 | 1 | 1 | 0 | 0 |
| ENST00000255883 | 1 | 0 | 1 | 1 | 0 | 1 |
| ENST00000256075 | 1 | 1 | 1 | 1 | 1 | 1 |
| ENST00000256580 | 1 | 1 | 1 | 1 | 0 | 0 |
| ENST00000256921 | 1 | 0 | 1 | 0 | 0 | 1 |
| ENST00000256973 | 1 | 0 | 1 | 0 | 0 | 0 |
| ENST00000256995 | 1 | 1 | 1 | 1 | 0 | 0 |
| ENST00000257021 | 1 | 1 | 1 | 1 | 0 | 0 |

|                 |   |   |   |   |   |   |
|-----------------|---|---|---|---|---|---|
| ENST00000257269 | 1 | 1 | 1 | 0 | 0 | 1 |
| ENST00000257302 | 1 | 1 | 1 | 1 | 1 | 1 |
| ENST00000257675 | 1 | 1 | 1 | 1 | 1 | 1 |
| ENST00000257780 | 1 | 0 | 1 | 0 | 0 | 0 |
| ENST00000258318 | 1 | 1 | 1 | 1 | 0 | 0 |
| ENST00000258728 | 1 | 1 | 1 | 1 | 0 | 1 |
| ENST00000258834 | 1 | 1 | 1 | 1 | 0 | 0 |
| ENST00000259102 | 1 | 0 | 1 | 0 | 0 | 1 |
| ENST00000259355 | 1 | 1 | 1 | 1 | 0 | 0 |
| ENST00000259480 | 1 | 1 | 1 | 1 | 0 | 1 |
| ENST00000259550 | 1 | 0 | 1 | 0 | 1 | 0 |
| ENST00000259662 | 1 | 1 | 1 | 1 | 1 | 1 |
| ENST00000259884 | 1 | 0 | 0 | 0 | 0 | 1 |
| ENST00000259939 | 1 | 1 | 1 | 1 | 0 | 0 |
| ENST00000259983 | 1 | 0 | 1 | 0 | 0 | 1 |
| ENST00000260742 | 1 | 0 | 1 | 0 | 0 | 0 |
| ENST00000261022 | 1 | 0 | 1 | 0 | 1 | 0 |
| ENST00000261334 | 1 | 1 | 1 | 0 | 0 | 1 |
| ENST00000261980 | 1 | 0 | 1 | 1 | 0 | 0 |
| ENST00000262362 | 1 | 0 | 1 | 0 | 0 | 0 |
| ENST00000266507 | 1 | 0 | 1 | 0 | 0 | 0 |
| ENST00000266550 | 1 | 1 | 1 | 0 | 1 | 1 |
| ENST00000266592 | 1 | 1 | 1 | 1 | 0 | 0 |
| ENST00000266737 | 1 | 0 | 1 | 0 | 1 | 1 |
| ENST00000266926 | 1 | 1 | 1 | 1 | 0 | 0 |
| ENST00000267346 | 1 | 1 | 1 | 1 | 0 | 1 |
| ENST00000267382 | 1 | 0 | 1 | 0 | 0 | 0 |
| ENST00000267406 | 1 | 0 | 1 | 1 | 1 | 1 |
| ENST00000267485 | 1 | 0 | 1 | 0 | 0 | 0 |
| ENST00000267491 | 1 | 0 | 1 | 0 | 0 | 1 |
| ENST00000267539 | 1 | 1 | 1 | 1 | 0 | 0 |
| ENST00000267752 | 1 | 1 | 1 | 1 | 0 | 1 |
| ENST00000267799 | 1 | 0 | 1 | 0 | 1 | 1 |
| ENST00000267877 | 1 | 1 | 1 | 1 | 1 | 1 |
| ENST00000268087 | 1 | 1 | 1 | 1 | 0 | 0 |
| ENST00000268173 | 1 | 0 | 1 | 0 | 0 | 0 |
| ENST00000268555 | 1 | 0 | 1 | 0 | 0 | 0 |
| ENST00000268750 | 1 | 0 | 1 | 1 | 1 | 1 |
| ENST00000268946 | 1 | 1 | 1 | 1 | 1 | 1 |
| ENST00000269062 | 1 | 0 | 1 | 0 | 0 | 0 |
| ENST00000269108 | 1 | 0 | 1 | 1 | 1 | 1 |
| ENST00000269169 | 1 | 0 | 1 | 0 | 1 | 1 |
| ENST00000269386 | 1 | 0 | 1 | 0 | 0 | 1 |
| ENST00000269477 | 1 | 0 | 1 | 1 | 1 | 1 |
| ENST00000269619 | 1 | 0 | 1 | 1 | 1 | 1 |
| ENST00000269643 | 1 | 1 | 1 | 1 | 1 | 1 |
| ENST00000269720 | 1 | 0 | 1 | 0 | 0 | 0 |
| ENST00000269723 | 1 | 0 | 1 | 1 | 0 | 1 |
| ENST00000270119 | 1 | 0 | 1 | 1 | 0 | 0 |
| ENST00000270493 | 1 | 0 | 1 | 0 | 0 | 1 |
| ENST00000270542 | 1 | 0 | 1 | 0 | 0 | 0 |
| ENST00000270547 | 1 | 0 | 1 | 1 | 0 | 0 |



|                 |   |   |   |   |   |   |
|-----------------|---|---|---|---|---|---|
| ENST00000270751 | 1 | 1 | 1 | 0 | 0 | 0 |
| ENST00000270920 | 1 | 0 | 1 | 0 | 0 | 0 |
| ENST00000270935 | 1 | 0 | 1 | 0 | 0 | 0 |
| ENST00000270949 | 1 | 1 | 1 | 1 | 0 | 0 |
| ENST00000270999 | 1 | 1 | 1 | 1 | 0 | 1 |
| ENST00000271084 | 1 | 0 | 1 | 1 | 1 | 1 |
| ENST00000271101 | 1 | 0 | 1 | 0 | 0 | 1 |
| ENST00000271219 | 1 | 1 | 1 | 1 | 0 | 0 |
| ENST00000271263 | 1 | 0 | 1 | 0 | 0 | 0 |
| ENST00000271276 | 1 | 0 | 1 | 0 | 0 | 1 |
| ENST00000271429 | 1 | 0 | 1 | 1 | 1 | 1 |
| ENST00000271456 | 1 | 0 | 1 | 1 | 1 | 1 |
| ENST00000272035 | 1 | 0 | 0 | 0 | 0 | 0 |
| ENST00000272180 | 1 | 0 | 1 | 1 | 1 | 1 |
| ENST00000272235 | 1 | 0 | 1 | 0 | 1 | 0 |
| ENST00000272273 | 0 | 1 | 1 | 0 | 1 | 0 |
| ENST00000272327 | 1 | 0 | 1 | 1 | 1 | 1 |
| ENST00000272400 | 1 | 1 | 1 | 1 | 0 | 0 |
| ENST00000272628 | 1 | 0 | 0 | 0 | 0 | 1 |
| ENST00000272785 | 1 | 0 | 1 | 0 | 0 | 0 |
| ENST00000272797 | 1 | 0 | 1 | 0 | 0 | 0 |
| ENST00000272799 | 1 | 1 | 1 | 1 | 1 | 1 |
| ENST00000272822 | 1 | 0 | 1 | 1 | 1 | 1 |
| ENST00000272848 | 0 | 0 | 1 | 0 | 0 | 0 |
| ENST00000272885 | 1 | 0 | 1 | 1 | 0 | 0 |
| ENST00000272909 | 1 | 0 | 1 | 1 | 0 | 0 |
| ENST00000272940 | 1 | 1 | 1 | 0 | 0 | 0 |
| ENST00000273097 | 1 | 1 | 1 | 1 | 1 | 1 |
| ENST00000273275 | 1 | 0 | 1 | 0 | 0 | 1 |
| ENST00000273337 | 1 | 0 | 1 | 0 | 0 | 0 |
| ENST00000273343 | 1 | 1 | 1 | 1 | 0 | 1 |
| ENST00000273411 | 1 | 1 | 1 | 1 | 1 | 1 |
| ENST00000273503 | 1 | 0 | 1 | 1 | 0 | 1 |
| ENST00000273794 | 1 | 0 | 1 | 0 | 0 | 1 |
| ENST00000273844 | 1 | 1 | 1 | 1 | 1 | 1 |
| ENST00000273967 | 1 | 0 | 1 | 1 | 1 | 1 |
| ENST00000273986 | 1 | 0 | 1 | 0 | 0 | 0 |
| ENST00000274083 | 1 | 1 | 1 | 1 | 0 | 0 |
| ENST00000274086 | 1 | 0 | 1 | 0 | 0 | 0 |
| ENST00000274165 | 1 | 0 | 1 | 0 | 0 | 0 |
| ENST00000274299 | 1 | 0 | 0 | 0 | 0 | 1 |
| ENST00000274460 | 1 | 1 | 1 | 0 | 0 | 0 |
| ENST00000274544 | 1 | 0 | 1 | 1 | 1 | 1 |
| ENST00000274595 | 1 | 1 | 0 | 1 | 0 | 0 |
| ENST00000274643 | 0 | 0 | 0 | 1 | 0 | 0 |
| ENST00000274652 | 1 | 1 | 1 | 0 | 1 | 1 |
| ENST00000274852 | 1 | 1 | 1 | 1 | 0 | 0 |
| ENST00000274927 | 1 | 0 | 1 | 1 | 1 | 1 |
| ENST00000274966 | 1 | 1 | 1 | 1 | 0 | 1 |
| ENST00000275033 | 1 | 0 | 1 | 0 | 0 | 0 |
| ENST00000275053 | 1 | 0 | 1 | 1 | 0 | 1 |
| ENST00000275206 | 1 | 1 | 1 | 1 | 0 | 1 |

|                 |   |   |   |   |   |   |
|-----------------|---|---|---|---|---|---|
| ENST00000275563 | 1 | 0 | 1 | 0 | 0 | 0 |
| ENST00000275609 | 1 | 0 | 1 | 0 | 0 | 1 |
| ENST00000275614 | 0 | 0 | 0 | 1 | 0 | 0 |
| ENST00000275760 | 1 | 1 | 1 | 1 | 1 | 0 |
| ENST00000275882 | 1 | 0 | 1 | 1 | 0 | 1 |
| ENST00000276101 | 1 | 0 | 0 | 0 | 0 | 0 |
| ENST00000276120 | 1 | 0 | 1 | 1 | 0 | 0 |
| ENST00000276144 | 1 | 0 | 1 | 0 | 0 | 1 |
| ENST00000276154 | 1 | 0 | 1 | 1 | 0 | 0 |
| ENST00000276195 | 1 | 0 | 1 | 0 | 0 | 0 |
| ENST00000276418 | 1 | 0 | 1 | 0 | 0 | 0 |
| ENST00000276430 | 1 | 1 | 1 | 1 | 1 | 1 |
| ENST00000276448 | 1 | 0 | 1 | 1 | 1 | 1 |
| ENST00000276514 | 1 | 1 | 1 | 1 | 1 | 1 |
| ENST00000276575 | 1 | 1 | 1 | 1 | 1 | 1 |
| ENST00000276653 | 0 | 0 | 0 | 0 | 0 | 1 |
| ENST00000276807 | 1 | 0 | 1 | 0 | 0 | 0 |
| ENST00000276938 | 1 | 1 | 1 | 1 | 0 | 0 |
| ENST00000277004 | 1 | 1 | 1 | 1 | 0 | 0 |
| ENST00000277050 | 1 | 0 | 1 | 0 | 0 | 0 |
| ENST00000277146 | 1 | 0 | 0 | 0 | 0 | 0 |
| ENST00000277259 | 1 | 0 | 1 | 0 | 0 | 1 |
| ENST00000277309 | 1 | 0 | 1 | 0 | 0 | 0 |
| ENST00000277526 | 1 | 0 | 1 | 0 | 0 | 0 |
| ENST00000277792 | 1 | 0 | 1 | 0 | 0 | 0 |
| ENST00000277860 | 1 | 0 | 1 | 1 | 0 | 1 |
| ENST00000277872 | 1 | 1 | 1 | 1 | 0 | 0 |
| ENST00000277891 | 0 | 0 | 0 | 0 | 0 | 1 |
| ENST00000278009 | 1 | 0 | 1 | 0 | 0 | 1 |
| ENST00000278180 | 1 | 1 | 1 | 0 | 1 | 1 |
| ENST00000278194 | 1 | 0 | 1 | 1 | 0 | 0 |
| ENST00000278207 | 1 | 0 | 1 | 0 | 0 | 0 |
| ENST00000278232 | 1 | 0 | 1 | 0 | 0 | 0 |
| ENST00000278237 | 1 | 0 | 1 | 1 | 0 | 1 |
| ENST00000278254 | 1 | 0 | 1 | 0 | 0 | 0 |
| ENST00000278656 | 1 | 0 | 1 | 1 | 0 | 1 |
| ENST00000278771 | 1 | 0 | 1 | 0 | 0 | 0 |
| ENST00000278891 | 1 | 0 | 1 | 1 | 0 | 0 |
| ENST00000278900 | 0 | 0 | 1 | 0 | 0 | 0 |
| ENST00000278924 | 1 | 0 | 1 | 0 | 1 | 1 |
| ENST00000278963 | 1 | 0 | 1 | 1 | 0 | 0 |
| ENST00000279001 | 1 | 0 | 1 | 0 | 0 | 0 |
| ENST00000279034 | 1 | 0 | 1 | 0 | 0 | 1 |
| ENST00000279121 | 1 | 0 | 1 | 1 | 0 | 1 |
| ENST00000279264 | 1 | 0 | 1 | 0 | 0 | 0 |
| ENST00000279413 | 0 | 0 | 1 | 1 | 0 | 0 |
| ENST00000279503 | 1 | 1 | 1 | 1 | 0 | 0 |
| ENST00000279800 | 1 | 0 | 0 | 0 | 0 | 0 |
| ENST00000279808 | 1 | 1 | 1 | 1 | 1 | 1 |
| ENST00000279874 | 1 | 1 | 1 | 1 | 1 | 1 |
| ENST00000279965 | 1 | 1 | 1 | 1 | 0 | 0 |
| ENST00000280054 | 1 | 0 | 1 | 1 | 1 | 1 |

|                 |   |   |   |   |   |   |
|-----------------|---|---|---|---|---|---|
| ENST00000280203 | 1 | 0 | 1 | 0 | 0 | 0 |
| ENST00000280230 | 1 | 0 | 1 | 1 | 0 | 0 |
| ENST00000280414 | 0 | 0 | 1 | 0 | 0 | 0 |
| ENST00000280575 | 1 | 0 | 1 | 0 | 0 | 1 |
| ENST00000280714 | 1 | 1 | 0 | 0 | 0 | 1 |
| ENST00000280755 | 1 | 0 | 1 | 1 | 1 | 1 |
| ENST00000280915 | 1 | 0 | 1 | 0 | 0 | 0 |
| ENST00000280926 | 1 | 1 | 1 | 0 | 0 | 1 |
| ENST00000281026 | 1 | 0 | 1 | 0 | 0 | 0 |
| ENST00000281047 | 1 | 0 | 1 | 0 | 0 | 0 |
| ENST00000281234 | 1 | 0 | 1 | 1 | 0 | 0 |
| ENST00000281345 | 1 | 0 | 1 | 0 | 0 | 0 |
| ENST00000281357 | 1 | 0 | 0 | 0 | 0 | 1 |
| ENST00000281471 | 1 | 1 | 1 | 1 | 1 | 1 |
| ENST00000281504 | 1 | 0 | 1 | 1 | 1 | 1 |
| ENST00000281555 | 0 | 0 | 1 | 0 | 0 | 0 |
| ENST00000281565 | 0 | 0 | 0 | 0 | 0 | 1 |
| ENST00000281595 | 0 | 0 | 0 | 0 | 0 | 1 |
| ENST00000281770 | 1 | 0 | 0 | 0 | 0 | 1 |
| ENST00000282009 | 1 | 0 | 1 | 0 | 1 | 1 |
| ENST00000282037 | 1 | 1 | 1 | 1 | 0 | 1 |
| ENST00000282152 | 1 | 0 | 1 | 1 | 0 | 1 |
| ENST00000282202 | 1 | 0 | 1 | 0 | 0 | 1 |
| ENST00000282233 | 1 | 1 | 1 | 1 | 0 | 1 |
| ENST00000282333 | 1 | 1 | 1 | 1 | 1 | 1 |
| ENST00000282384 | 1 | 0 | 1 | 0 | 1 | 1 |
| ENST00000282413 | 1 | 0 | 1 | 1 | 1 | 1 |
| ENST00000282422 | 1 | 0 | 1 | 0 | 0 | 0 |
| ENST00000282516 | 1 | 0 | 1 | 0 | 0 | 0 |
| ENST00000282535 | 1 | 0 | 1 | 1 | 0 | 0 |
| ENST00000282639 | 1 | 0 | 0 | 0 | 0 | 1 |
| ENST00000282683 | 1 | 1 | 1 | 1 | 0 | 1 |
| ENST00000282797 | 1 | 1 | 1 | 1 | 1 | 1 |
| ENST00000282871 | 1 | 0 | 1 | 1 | 1 | 1 |
| ENST00000282959 | 1 | 0 | 1 | 0 | 0 | 1 |
| ENST00000282988 | 1 | 0 | 1 | 0 | 1 | 1 |
| ENST00000283038 | 1 | 0 | 1 | 0 | 1 | 1 |
| ENST00000283060 | 1 | 0 | 1 | 0 | 0 | 1 |
| ENST00000283134 | 1 | 1 | 1 | 1 | 0 | 0 |
| ENST00000283333 | 1 | 0 | 1 | 0 | 1 | 1 |
| ENST00000283385 | 1 | 1 | 1 | 1 | 0 | 0 |
| ENST00000283397 | 1 | 1 | 1 | 1 | 1 | 0 |
| ENST00000283682 | 1 | 0 | 1 | 1 | 0 | 0 |
| ENST00000283696 | 1 | 0 | 1 | 1 | 0 | 0 |
| ENST00000283902 | 1 | 0 | 1 | 0 | 0 | 0 |
| ENST00000283988 | 1 | 0 | 1 | 0 | 0 | 1 |
| ENST00000284026 | 1 | 1 | 1 | 1 | 1 | 1 |
| ENST00000284082 | 1 | 0 | 1 | 0 | 0 | 0 |
| ENST00000284144 | 1 | 0 | 1 | 1 | 1 | 0 |
| ENST00000284158 | 1 | 0 | 1 | 0 | 0 | 0 |
| ENST00000284286 | 1 | 1 | 1 | 1 | 1 | 0 |
| ENST00000284325 | 1 | 0 | 1 | 0 | 1 | 1 |

|                 |   |   |   |   |   |   |
|-----------------|---|---|---|---|---|---|
| ENST00000284414 | 1 | 0 | 1 | 1 | 0 | 1 |
| ENST00000284516 | 1 | 1 | 1 | 1 | 0 | 0 |
| ENST00000284742 | 1 | 0 | 1 | 0 | 0 | 1 |
| ENST00000284765 | 0 | 0 | 0 | 0 | 0 | 1 |
| ENST00000284852 | 1 | 0 | 1 | 0 | 0 | 0 |
| ENST00000284857 | 1 | 0 | 1 | 0 | 1 | 1 |
| ENST00000285058 | 1 | 0 | 1 | 1 | 1 | 1 |
| ENST00000285087 | 1 | 0 | 1 | 1 | 0 | 0 |
| ENST00000285188 | 0 | 0 | 1 | 0 | 0 | 0 |
| ENST00000285289 | 1 | 0 | 1 | 1 | 1 | 1 |
| ENST00000285338 | 1 | 1 | 1 | 1 | 1 | 1 |
| ENST00000285392 | 1 | 0 | 1 | 0 | 0 | 0 |
| ENST00000285459 | 1 | 1 | 1 | 1 | 1 | 1 |
| ENST00000285479 | 1 | 0 | 1 | 1 | 1 | 0 |
| ENST00000285684 | 1 | 0 | 1 | 0 | 0 | 0 |
| ENST00000285726 | 1 | 0 | 1 | 0 | 0 | 1 |
| ENST00000285782 | 1 | 0 | 1 | 0 | 0 | 0 |
| ENST00000286095 | 1 | 0 | 1 | 0 | 1 | 1 |
| ENST00000286203 | 0 | 0 | 0 | 1 | 0 | 0 |
| ENST00000286249 | 1 | 1 | 1 | 0 | 0 | 0 |
| ENST00000286523 | 1 | 0 | 1 | 0 | 0 | 0 |
| ENST00000286557 | 0 | 0 | 0 | 0 | 0 | 1 |
| ENST00000286669 | 1 | 0 | 0 | 0 | 0 | 1 |
| ENST00000286675 | 1 | 0 | 1 | 0 | 0 | 1 |
| ENST00000286728 | 1 | 0 | 1 | 1 | 0 | 1 |
| ENST00000286784 | 1 | 0 | 0 | 0 | 0 | 0 |
| ENST00000286820 | 0 | 1 | 0 | 0 | 0 | 1 |
| ENST00000286825 | 1 | 0 | 1 | 0 | 0 | 1 |
| ENST00000287063 | 1 | 0 | 1 | 0 | 0 | 0 |
| ENST00000287068 | 1 | 1 | 1 | 1 | 0 | 0 |
| ENST00000287075 | 1 | 0 | 1 | 0 | 0 | 1 |
| ENST00000287118 | 1 | 1 | 1 | 1 | 0 | 0 |
| ENST00000287187 | 1 | 1 | 1 | 1 | 0 | 0 |
| ENST00000287216 | 1 | 0 | 1 | 0 | 0 | 0 |
| ENST00000287399 | 0 | 0 | 0 | 0 | 0 | 1 |
| ENST00000287402 | 0 | 0 | 1 | 0 | 0 | 0 |
| ENST00000287474 | 1 | 0 | 1 | 0 | 0 | 0 |
| ENST00000287503 | 1 | 0 | 1 | 0 | 0 | 0 |
| ENST00000287529 | 1 | 0 | 1 | 1 | 1 | 1 |
| ENST00000287585 | 1 | 0 | 1 | 1 | 0 | 0 |
| ENST00000287594 | 1 | 0 | 1 | 0 | 0 | 0 |
| ENST00000287660 | 1 | 0 | 1 | 0 | 0 | 1 |
| ENST00000287674 | 1 | 0 | 1 | 0 | 0 | 0 |
| ENST00000287788 | 1 | 0 | 1 | 0 | 0 | 0 |
| ENST00000287819 | 0 | 0 | 1 | 0 | 0 | 1 |
| ENST00000287971 | 1 | 0 | 0 | 0 | 0 | 1 |
| ENST00000288059 | 1 | 0 | 1 | 0 | 0 | 1 |
| ENST00000288061 | 1 | 0 | 0 | 0 | 0 | 0 |
| ENST00000288127 | 1 | 0 | 1 | 1 | 1 | 1 |
| ENST00000288276 | 0 | 1 | 0 | 1 | 0 | 0 |
| ENST00000288306 | 1 | 0 | 1 | 1 | 0 | 0 |
| ENST00000288330 | 1 | 0 | 1 | 1 | 1 | 1 |

|                 |   |   |   |   |   |   |
|-----------------|---|---|---|---|---|---|
| ENST00000288367 | 1 | 0 | 1 | 0 | 0 | 0 |
| ENST00000288475 | 0 | 0 | 1 | 0 | 0 | 0 |
| ENST00000288518 | 1 | 0 | 1 | 1 | 0 | 0 |
| ENST00000288673 | 0 | 0 | 0 | 0 | 0 | 1 |
| ENST00000288933 | 1 | 0 | 1 | 0 | 0 | 0 |
| ENST00000289005 | 1 | 1 | 1 | 1 | 1 | 1 |
| ENST00000289078 | 1 | 0 | 1 | 0 | 0 | 0 |
| ENST00000289122 | 1 | 0 | 1 | 1 | 0 | 1 |
| ENST00000289164 | 1 | 1 | 1 | 1 | 1 | 1 |
| ENST00000289226 | 1 | 0 | 1 | 1 | 0 | 1 |
| ENST00000289353 | 1 | 1 | 1 | 1 | 0 | 0 |
| ENST00000289388 | 1 | 0 | 1 | 0 | 0 | 0 |
| ENST00000289819 | 1 | 1 | 1 | 1 | 1 | 1 |
| ENST00000289826 | 1 | 0 | 1 | 0 | 0 | 1 |
| ENST00000289853 | 1 | 0 | 1 | 0 | 0 | 0 |
| ENST00000290053 | 1 | 0 | 1 | 0 | 0 | 0 |
| ENST00000290068 | 1 | 1 | 1 | 1 | 0 | 1 |
| ENST00000290220 | 1 | 0 | 0 | 1 | 0 | 1 |
| ENST00000290369 | 1 | 0 | 1 | 0 | 1 | 1 |
| ENST00000290415 | 0 | 0 | 0 | 0 | 0 | 1 |
| ENST00000290428 | 1 | 0 | 1 | 0 | 0 | 0 |
| ENST00000290478 | 1 | 0 | 1 | 1 | 0 | 0 |
| ENST00000290628 | 1 | 1 | 1 | 1 | 0 | 0 |
| ENST00000290871 | 1 | 0 | 1 | 0 | 0 | 1 |
| ENST00000290963 | 1 | 1 | 1 | 1 | 0 | 0 |
| ENST00000290995 | 1 | 0 | 0 | 0 | 0 | 1 |
| ENST00000290998 | 1 | 0 | 1 | 0 | 1 | 0 |
| ENST00000291084 | 1 | 0 | 0 | 0 | 0 | 1 |
| ENST00000291090 | 1 | 1 | 1 | 1 | 0 | 1 |
| ENST00000291206 | 1 | 0 | 1 | 1 | 0 | 0 |
| ENST00000291466 | 1 | 1 | 1 | 1 | 1 | 1 |
| ENST00000291501 | 1 | 1 | 1 | 1 | 0 | 0 |
| ENST00000291587 | 1 | 0 | 1 | 0 | 0 | 0 |
| ENST00000291654 | 1 | 0 | 1 | 0 | 0 | 0 |
| ENST00000291738 | 1 | 0 | 1 | 0 | 0 | 0 |
| ENST00000291751 | 1 | 0 | 1 | 0 | 0 | 0 |
| ENST00000291867 | 1 | 0 | 1 | 0 | 0 | 1 |
| ENST00000291929 | 1 | 0 | 1 | 1 | 1 | 0 |
| ENST00000291965 | 1 | 0 | 1 | 0 | 0 | 0 |
| ENST00000292000 | 1 | 0 | 1 | 1 | 0 | 1 |
| ENST00000292008 | 1 | 0 | 1 | 1 | 0 | 0 |
| ENST00000292116 | 1 | 0 | 1 | 0 | 0 | 1 |
| ENST00000292141 | 1 | 0 | 1 | 0 | 0 | 1 |
| ENST00000292190 | 0 | 0 | 0 | 0 | 0 | 1 |
| ENST00000292207 | 1 | 1 | 1 | 1 | 0 | 1 |
| ENST00000292523 | 1 | 0 | 1 | 0 | 0 | 0 |
| ENST00000292772 | 1 | 0 | 1 | 0 | 0 | 0 |
| ENST00000292780 | 1 | 0 | 1 | 0 | 0 | 0 |
| ENST00000292854 | 1 | 0 | 1 | 1 | 0 | 0 |
| ENST00000292869 | 1 | 0 | 1 | 0 | 0 | 0 |
| ENST00000293013 | 1 | 1 | 1 | 1 | 0 | 0 |
| ENST00000293096 | 1 | 0 | 1 | 0 | 1 | 1 |

|                 |   |   |   |   |   |   |
|-----------------|---|---|---|---|---|---|
| ENST00000293127 | 1 | 1 | 1 | 1 | 0 | 0 |
| ENST00000293136 | 1 | 0 | 1 | 0 | 0 | 0 |
| ENST00000293171 | 1 | 0 | 1 | 0 | 0 | 0 |
| ENST00000293220 | 1 | 1 | 1 | 1 | 0 | 1 |
| ENST00000293231 | 1 | 0 | 1 | 0 | 0 | 0 |
| ENST00000293257 | 1 | 0 | 1 | 0 | 0 | 0 |
| ENST00000293293 | 1 | 0 | 1 | 0 | 0 | 0 |
| ENST00000293489 | 1 | 0 | 1 | 0 | 0 | 0 |
| ENST00000293571 | 1 | 1 | 1 | 1 | 1 | 1 |
| ENST00000293695 | 1 | 0 | 1 | 0 | 0 | 0 |
| ENST00000293741 | 1 | 0 | 1 | 1 | 1 | 1 |
| ENST00000293782 | 1 | 0 | 1 | 0 | 0 | 1 |
| ENST00000293815 | 1 | 0 | 1 | 0 | 0 | 1 |
| ENST00000293844 | 1 | 0 | 1 | 0 | 0 | 0 |
| ENST00000293904 | 1 | 1 | 1 | 1 | 0 | 0 |
| ENST00000293937 | 1 | 1 | 1 | 0 | 0 | 1 |
| ENST00000293974 | 1 | 0 | 1 | 0 | 0 | 1 |
| ENST00000293981 | 1 | 0 | 1 | 1 | 0 | 0 |
| ENST00000293997 | 0 | 0 | 0 | 0 | 0 | 1 |
| ENST00000294270 | 1 | 0 | 1 | 1 | 1 | 0 |
| ENST00000294283 | 1 | 0 | 1 | 0 | 0 | 0 |
| ENST00000294363 | 1 | 0 | 1 | 0 | 0 | 0 |
| ENST00000294446 | 1 | 1 | 1 | 1 | 0 | 1 |
| ENST00000294470 | 0 | 0 | 0 | 0 | 0 | 1 |
| ENST00000294473 | 1 | 0 | 1 | 0 | 0 | 0 |
| ENST00000294488 | 1 | 0 | 1 | 0 | 0 | 0 |
| ENST00000294523 | 1 | 0 | 1 | 0 | 0 | 0 |
| ENST00000294557 | 1 | 0 | 1 | 0 | 0 | 0 |
| ENST00000294604 | 1 | 1 | 1 | 1 | 0 | 1 |
| ENST00000294637 | 1 | 1 | 1 | 1 | 0 | 1 |
| ENST00000294684 | 1 | 0 | 1 | 0 | 0 | 0 |
| ENST00000294689 | 1 | 0 | 1 | 0 | 0 | 1 |
| ENST00000294694 | 1 | 1 | 1 | 1 | 0 | 1 |
| ENST00000294706 | 1 | 0 | 1 | 0 | 0 | 0 |
| ENST00000294727 | 1 | 0 | 1 | 1 | 1 | 1 |
| ENST00000294746 | 1 | 0 | 0 | 0 | 0 | 0 |
| ENST00000294770 | 1 | 0 | 1 | 0 | 0 | 1 |
| ENST00000294808 | 1 | 0 | 1 | 0 | 0 | 1 |
| ENST00000294819 | 1 | 1 | 1 | 1 | 1 | 1 |
| ENST00000294839 | 1 | 0 | 1 | 0 | 0 | 0 |
| ENST00000294878 | 1 | 0 | 1 | 0 | 0 | 0 |
| ENST00000294901 | 1 | 0 | 1 | 1 | 1 | 1 |
| ENST00000294913 | 1 | 1 | 1 | 1 | 1 | 1 |
| ENST00000294926 | 1 | 0 | 1 | 0 | 0 | 0 |
| ENST00000294945 | 0 | 0 | 1 | 0 | 1 | 0 |
| ENST00000294947 | 1 | 0 | 0 | 0 | 0 | 0 |
| ENST00000295003 | 1 | 0 | 1 | 0 | 0 | 0 |
| ENST00000295021 | 1 | 1 | 1 | 1 | 0 | 0 |
| ENST00000295028 | 1 | 0 | 0 | 0 | 0 | 0 |
| ENST00000295037 | 1 | 0 | 1 | 1 | 1 | 1 |
| ENST00000295063 | 1 | 0 | 1 | 0 | 0 | 1 |
| ENST00000295064 | 1 | 0 | 0 | 0 | 0 | 1 |

|                 |   |   |   |   |   |   |
|-----------------|---|---|---|---|---|---|
| ENST00000295072 | 1 | 0 | 1 | 1 | 1 | 1 |
| ENST00000295112 | 1 | 0 | 1 | 0 | 0 | 1 |
| ENST00000295127 | 1 | 1 | 1 | 1 | 1 | 1 |
| ENST00000295134 | 1 | 1 | 1 | 1 | 1 | 1 |
| ENST00000295138 | 1 | 0 | 1 | 1 | 1 | 1 |
| ENST00000295147 | 1 | 1 | 1 | 1 | 0 | 0 |
| ENST00000295192 | 1 | 0 | 1 | 0 | 0 | 1 |
| ENST00000295220 | 1 | 0 | 0 | 0 | 0 | 0 |
| ENST00000295230 | 1 | 0 | 1 | 1 | 0 | 1 |
| ENST00000295239 | 1 | 0 | 1 | 0 | 0 | 0 |
| ENST00000295253 | 1 | 0 | 1 | 0 | 0 | 1 |
| ENST00000295257 | 1 | 1 | 1 | 1 | 1 | 1 |
| ENST00000295269 | 0 | 0 | 0 | 0 | 0 | 1 |
| ENST00000295286 | 0 | 1 | 0 | 0 | 0 | 0 |
| ENST00000295298 | 1 | 1 | 1 | 1 | 1 | 1 |
| ENST00000295303 | 1 | 0 | 1 | 0 | 0 | 0 |
| ENST00000295319 | 1 | 0 | 1 | 1 | 0 | 1 |
| ENST00000295320 | 1 | 0 | 1 | 1 | 0 | 1 |
| ENST00000295325 | 1 | 0 | 1 | 0 | 0 | 0 |
| ENST00000295353 | 1 | 0 | 0 | 1 | 0 | 0 |
| ENST00000295363 | 1 | 1 | 0 | 0 | 0 | 0 |
| ENST00000295393 | 1 | 0 | 1 | 0 | 0 | 1 |
| ENST00000295439 | 1 | 0 | 1 | 0 | 1 | 1 |
| ENST00000295443 | 0 | 0 | 1 | 0 | 0 | 0 |
| ENST00000295445 | 0 | 0 | 0 | 0 | 0 | 1 |
| ENST00000295446 | 1 | 0 | 1 | 0 | 0 | 0 |
| ENST00000295456 | 1 | 0 | 1 | 0 | 0 | 0 |
| ENST00000295471 | 1 | 0 | 1 | 0 | 1 | 1 |
| ENST00000295535 | 1 | 0 | 1 | 0 | 0 | 0 |
| ENST00000295549 | 0 | 0 | 0 | 1 | 0 | 0 |
| ENST00000295556 | 1 | 0 | 1 | 0 | 0 | 1 |
| ENST00000295567 | 1 | 1 | 1 | 1 | 0 | 0 |
| ENST00000295576 | 1 | 0 | 1 | 0 | 0 | 0 |
| ENST00000295608 | 1 | 1 | 1 | 0 | 0 | 1 |
| ENST00000295627 | 1 | 1 | 1 | 1 | 0 | 1 |
| ENST00000295638 | 1 | 0 | 1 | 0 | 0 | 1 |
| ENST00000295647 | 1 | 0 | 1 | 1 | 0 | 1 |
| ENST00000295650 | 1 | 0 | 1 | 0 | 0 | 0 |
| ENST00000295684 | 1 | 1 | 1 | 0 | 1 | 1 |
| ENST00000295711 | 1 | 1 | 1 | 1 | 0 | 0 |
| ENST00000295733 | 1 | 1 | 1 | 1 | 0 | 1 |
| ENST00000295790 | 1 | 0 | 1 | 0 | 0 | 0 |
| ENST00000295827 | 1 | 1 | 1 | 0 | 1 | 1 |
| ENST00000295853 | 1 | 0 | 1 | 1 | 1 | 1 |
| ENST00000295858 | 0 | 0 | 0 | 0 | 0 | 1 |
| ENST00000295906 | 1 | 0 | 1 | 1 | 1 | 1 |
| ENST00000295984 | 1 | 0 | 1 | 0 | 0 | 1 |
| ENST00000295993 | 1 | 0 | 0 | 0 | 0 | 1 |
| ENST00000295998 | 0 | 0 | 1 | 0 | 0 | 0 |
| ENST00000296036 | 1 | 0 | 1 | 0 | 0 | 1 |
| ENST00000296045 | 1 | 1 | 1 | 1 | 1 | 1 |
| ENST00000296057 | 1 | 0 | 1 | 0 | 0 | 1 |

|                 |   |   |   |   |   |   |
|-----------------|---|---|---|---|---|---|
| ENST00000296110 | 1 | 1 | 1 | 1 | 0 | 1 |
| ENST00000296128 | 1 | 1 | 1 | 1 | 1 | 0 |
| ENST00000296139 | 1 | 0 | 1 | 0 | 0 | 0 |
| ENST00000296148 | 1 | 0 | 1 | 1 | 1 | 0 |
| ENST00000296173 | 1 | 1 | 1 | 1 | 1 | 1 |
| ENST00000296248 | 0 | 0 | 0 | 0 | 0 | 1 |
| ENST00000296311 | 1 | 1 | 1 | 1 | 0 | 1 |
| ENST00000296320 | 1 | 0 | 1 | 1 | 1 | 1 |
| ENST00000296322 | 1 | 0 | 1 | 1 | 0 | 0 |
| ENST00000296361 | 1 | 0 | 1 | 0 | 0 | 0 |
| ENST00000296390 | 1 | 0 | 1 | 0 | 0 | 1 |
| ENST00000296400 | 1 | 0 | 1 | 0 | 0 | 0 |
| ENST00000296403 | 1 | 0 | 1 | 0 | 0 | 0 |
| ENST00000296438 | 0 | 0 | 1 | 0 | 0 | 0 |
| ENST00000296448 | 1 | 0 | 1 | 1 | 0 | 1 |
| ENST00000296460 | 1 | 0 | 1 | 0 | 0 | 0 |
| ENST00000296470 | 1 | 0 | 1 | 1 | 1 | 1 |
| ENST00000296491 | 1 | 0 | 1 | 0 | 0 | 1 |
| ENST00000296502 | 1 | 0 | 1 | 1 | 1 | 1 |
| ENST00000296531 | 1 | 0 | 1 | 0 | 0 | 0 |
| ENST00000296603 | 1 | 1 | 1 | 1 | 0 | 0 |
| ENST00000296609 | 1 | 0 | 1 | 1 | 1 | 1 |
| ENST00000296638 | 1 | 0 | 1 | 1 | 0 | 0 |
| ENST00000296665 | 1 | 1 | 1 | 1 | 0 | 0 |
| ENST00000296699 | 1 | 0 | 1 | 0 | 0 | 1 |
| ENST00000296740 | 1 | 0 | 1 | 1 | 0 | 0 |
| ENST00000296808 | 1 | 0 | 1 | 1 | 1 | 1 |
| ENST00000296815 | 1 | 0 | 1 | 0 | 1 | 0 |
| ENST00000296818 | 1 | 0 | 1 | 0 | 1 | 1 |
| ENST00000296831 | 1 | 0 | 1 | 0 | 0 | 0 |
| ENST00000296926 | 1 | 0 | 1 | 1 | 0 | 0 |
| ENST00000296973 | 1 | 1 | 1 | 1 | 0 | 1 |
| ENST00000296996 | 1 | 0 | 1 | 0 | 0 | 0 |
| ENST00000296997 | 0 | 0 | 0 | 0 | 0 | 1 |
| ENST00000297023 | 1 | 0 | 1 | 0 | 0 | 1 |
| ENST00000297039 | 1 | 0 | 1 | 0 | 0 | 0 |
| ENST00000297060 | 1 | 0 | 1 | 0 | 0 | 1 |
| ENST00000297066 | 1 | 1 | 1 | 1 | 1 | 1 |
| ENST00000297068 | 1 | 0 | 1 | 0 | 0 | 0 |
| ENST00000297073 | 1 | 0 | 1 | 0 | 0 | 1 |
| ENST00000297077 | 1 | 0 | 1 | 1 | 0 | 0 |
| ENST00000297078 | 1 | 0 | 0 | 0 | 1 | 1 |
| ENST00000297148 | 1 | 0 | 0 | 0 | 0 | 0 |
| ENST00000297157 | 1 | 1 | 1 | 1 | 1 | 1 |
| ENST00000297220 | 1 | 0 | 1 | 0 | 0 | 0 |
| ENST00000297264 | 1 | 0 | 1 | 0 | 0 | 1 |
| ENST00000297304 | 1 | 1 | 1 | 1 | 1 | 1 |
| ENST00000297317 | 1 | 1 | 1 | 1 | 0 | 0 |
| ENST00000297321 | 1 | 0 | 1 | 0 | 0 | 0 |
| ENST00000297335 | 1 | 0 | 1 | 1 | 1 | 1 |
| ENST00000297368 | 1 | 0 | 1 | 1 | 0 | 0 |
| ENST00000297378 | 1 | 0 | 1 | 1 | 0 | 1 |



|                 |   |   |   |   |   |   |
|-----------------|---|---|---|---|---|---|
| ENST00000297383 | 1 | 0 | 0 | 0 | 0 | 1 |
| ENST00000297437 | 1 | 0 | 1 | 1 | 1 | 1 |
| ENST00000297474 | 1 | 0 | 1 | 1 | 1 | 1 |
| ENST00000297541 | 0 | 0 | 1 | 1 | 0 | 0 |
| ENST00000297544 | 1 | 0 | 1 | 0 | 0 | 0 |
| ENST00000297572 | 1 | 0 | 1 | 1 | 0 | 0 |
| ENST00000297622 | 1 | 0 | 1 | 1 | 1 | 1 |
| ENST00000297632 | 1 | 0 | 1 | 0 | 0 | 0 |
| ENST00000297667 | 1 | 0 | 1 | 1 | 0 | 0 |
| ENST00000297680 | 1 | 0 | 0 | 0 | 0 | 1 |
| ENST00000297681 | 1 | 1 | 1 | 1 | 0 | 1 |
| ENST00000297722 | 1 | 0 | 1 | 0 | 0 | 1 |
| ENST00000297783 | 1 | 1 | 1 | 1 | 1 | 1 |
| ENST00000297786 | 1 | 0 | 1 | 0 | 0 | 1 |
| ENST00000297789 | 1 | 0 | 1 | 0 | 0 | 0 |
| ENST00000297802 | 0 | 0 | 0 | 1 | 0 | 0 |
| ENST00000297812 | 1 | 0 | 1 | 1 | 0 | 1 |
| ENST00000297859 | 1 | 1 | 1 | 1 | 0 | 1 |
| ENST00000297880 | 1 | 1 | 1 | 0 | 0 | 1 |
| ENST00000297884 | 1 | 0 | 1 | 0 | 0 | 0 |
| ENST00000297925 | 1 | 0 | 1 | 0 | 0 | 1 |
| ENST00000297930 | 1 | 0 | 1 | 1 | 1 | 1 |
| ENST00000297943 | 1 | 0 | 1 | 1 | 1 | 1 |
| ENST00000297945 | 1 | 0 | 0 | 0 | 0 | 1 |
| ENST00000297964 | 1 | 1 | 1 | 0 | 0 | 0 |
| ENST00000297971 | 1 | 0 | 1 | 0 | 0 | 1 |
| ENST00000297972 | 1 | 1 | 1 | 1 | 1 | 1 |
| ENST00000297973 | 1 | 0 | 1 | 0 | 0 | 0 |
| ENST00000298009 | 1 | 0 | 1 | 1 | 0 | 0 |
| ENST00000298023 | 1 | 0 | 1 | 0 | 1 | 1 |
| ENST00000298024 | 1 | 0 | 1 | 1 | 1 | 1 |
| ENST00000298026 | 1 | 0 | 1 | 1 | 1 | 1 |
| ENST00000298035 | 1 | 1 | 1 | 1 | 0 | 1 |
| ENST00000298043 | 1 | 0 | 1 | 0 | 0 | 0 |
| ENST00000298060 | 1 | 1 | 1 | 1 | 0 | 0 |
| ENST00000298100 | 1 | 0 | 1 | 0 | 0 | 0 |
| ENST00000298118 | 0 | 0 | 0 | 0 | 0 | 1 |
| ENST00000298138 | 1 | 1 | 1 | 1 | 1 | 1 |
| ENST00000298155 | 1 | 0 | 1 | 0 | 0 | 0 |
| ENST00000298211 | 1 | 0 | 1 | 0 | 0 | 1 |
| ENST00000298249 | 1 | 1 | 1 | 1 | 1 | 1 |
| ENST00000298250 | 1 | 0 | 1 | 0 | 0 | 0 |
| ENST00000298300 | 1 | 0 | 1 | 0 | 0 | 0 |
| ENST00000298353 | 1 | 0 | 1 | 0 | 0 | 1 |
| ENST00000298360 | 1 | 0 | 1 | 0 | 0 | 0 |
| ENST00000298391 | 1 | 0 | 1 | 0 | 0 | 0 |
| ENST00000298463 | 1 | 0 | 1 | 1 | 1 | 1 |
| ENST00000298480 | 0 | 1 | 0 | 0 | 0 | 1 |
| ENST00000298543 | 1 | 1 | 1 | 1 | 1 | 1 |
| ENST00000298567 | 1 | 1 | 1 | 1 | 1 | 1 |
| ENST00000298605 | 1 | 0 | 1 | 0 | 0 | 0 |
| ENST00000298653 | 1 | 1 | 1 | 1 | 0 | 0 |

|                 |   |   |   |   |   |   |
|-----------------|---|---|---|---|---|---|
| ENST00000298710 | 1 | 1 | 1 | 1 | 0 | 1 |
| ENST00000298731 | 1 | 0 | 1 | 0 | 0 | 0 |
| ENST00000298733 | 1 | 1 | 1 | 1 | 1 | 1 |
| ENST00000298744 | 1 | 0 | 1 | 1 | 1 | 0 |
| ENST00000298756 | 1 | 0 | 1 | 0 | 0 | 0 |
| ENST00000298780 | 1 | 1 | 1 | 1 | 0 | 0 |
| ENST00000298809 | 1 | 0 | 1 | 1 | 0 | 0 |
| ENST00000298818 | 1 | 1 | 1 | 1 | 0 | 1 |
| ENST00000298824 | 1 | 0 | 1 | 0 | 0 | 0 |
| ENST00000298828 | 0 | 0 | 0 | 1 | 0 | 0 |
| ENST00000298839 | 1 | 0 | 1 | 0 | 1 | 1 |
| ENST00000298862 | 1 | 1 | 1 | 0 | 1 | 1 |
| ENST00000298864 | 1 | 0 | 1 | 0 | 0 | 0 |
| ENST00000298876 | 1 | 1 | 1 | 1 | 0 | 0 |
| ENST00000298888 | 1 | 0 | 1 | 0 | 0 | 1 |
| ENST00000298903 | 1 | 1 | 1 | 1 | 1 | 1 |
| ENST00000298906 | 1 | 1 | 1 | 1 | 0 | 1 |
| ENST00000298932 | 1 | 0 | 1 | 1 | 1 | 1 |
| ENST00000298943 | 1 | 0 | 1 | 0 | 0 | 0 |
| ENST00000298968 | 1 | 0 | 1 | 0 | 0 | 1 |
| ENST00000299057 | 1 | 1 | 1 | 1 | 0 | 0 |
| ENST00000299061 | 1 | 0 | 1 | 0 | 0 | 0 |
| ENST00000299097 | 1 | 1 | 1 | 1 | 0 | 0 |
| ENST00000299100 | 1 | 1 | 1 | 1 | 0 | 0 |
| ENST00000299111 | 1 | 1 | 1 | 1 | 1 | 1 |
| ENST00000299114 | 0 | 0 | 0 | 0 | 0 | 1 |
| ENST00000299128 | 1 | 0 | 1 | 1 | 0 | 1 |
| ENST00000299129 | 1 | 0 | 1 | 0 | 0 | 1 |
| ENST00000299187 | 1 | 0 | 1 | 1 | 1 | 1 |
| ENST00000299193 | 1 | 0 | 1 | 0 | 0 | 1 |
| ENST00000299234 | 1 | 1 | 1 | 1 | 0 | 0 |
| ENST00000299270 | 1 | 0 | 0 | 0 | 0 | 0 |
| ENST00000299294 | 1 | 0 | 1 | 0 | 0 | 0 |
| ENST00000299298 | 1 | 0 | 1 | 0 | 0 | 1 |
| ENST00000299303 | 1 | 0 | 1 | 0 | 0 | 0 |
| ENST00000299317 | 1 | 1 | 1 | 1 | 0 | 0 |
| ENST00000299383 | 1 | 1 | 1 | 1 | 0 | 1 |
| ENST00000299386 | 1 | 1 | 1 | 1 | 1 | 1 |
| ENST00000299396 | 1 | 0 | 0 | 0 | 0 | 1 |
| ENST00000299434 | 1 | 0 | 1 | 0 | 0 | 0 |
| ENST00000299455 | 1 | 1 | 1 | 1 | 0 | 0 |
| ENST00000299460 | 1 | 0 | 1 | 0 | 1 | 1 |
| ENST00000299546 | 1 | 0 | 1 | 1 | 1 | 1 |
| ENST00000299594 | 1 | 1 | 1 | 1 | 1 | 1 |
| ENST00000299651 | 1 | 0 | 1 | 0 | 0 | 1 |
| ENST00000299675 | 1 | 0 | 1 | 1 | 0 | 1 |
| ENST00000299709 | 1 | 0 | 1 | 0 | 0 | 0 |
| ENST00000299775 | 1 | 0 | 1 | 0 | 0 | 0 |
| ENST00000299789 | 1 | 0 | 1 | 0 | 0 | 1 |
| ENST00000299815 | 0 | 0 | 1 | 0 | 0 | 1 |
| ENST00000299816 | 1 | 1 | 1 | 1 | 0 | 0 |
| ENST00000299874 | 0 | 1 | 0 | 0 | 0 | 1 |

|                 |   |   |   |   |   |   |
|-----------------|---|---|---|---|---|---|
| ENST00000299990 | 1 | 1 | 1 | 0 | 0 | 1 |
| ENST00000299997 | 1 | 1 | 1 | 1 | 0 | 0 |
| ENST00000300012 | 1 | 0 | 1 | 0 | 0 | 1 |
| ENST00000300016 | 1 | 0 | 1 | 0 | 1 | 1 |
| ENST00000300069 | 1 | 0 | 0 | 0 | 0 | 0 |
| ENST00000300077 | 1 | 1 | 1 | 1 | 0 | 0 |
| ENST00000300106 | 0 | 0 | 0 | 0 | 0 | 1 |
| ENST00000300110 | 1 | 0 | 1 | 0 | 0 | 0 |
| ENST00000300165 | 1 | 0 | 1 | 1 | 0 | 0 |
| ENST00000300211 | 0 | 0 | 1 | 0 | 0 | 0 |
| ENST00000300224 | 1 | 0 | 1 | 0 | 1 | 1 |
| ENST00000300244 | 1 | 0 | 1 | 0 | 0 | 0 |
| ENST00000300330 | 1 | 0 | 1 | 1 | 1 | 1 |
| ENST00000300365 | 1 | 0 | 1 | 0 | 1 | 1 |
| ENST00000300366 | 1 | 0 | 1 | 1 | 0 | 0 |
| ENST00000300414 | 1 | 0 | 1 | 0 | 0 | 1 |
| ENST00000300480 | 1 | 1 | 1 | 1 | 0 | 1 |
| ENST00000300499 | 1 | 0 | 1 | 0 | 0 | 0 |
| ENST00000300552 | 1 | 1 | 1 | 1 | 1 | 1 |
| ENST00000300598 | 1 | 0 | 1 | 0 | 0 | 0 |
| ENST00000300662 | 1 | 0 | 1 | 0 | 1 | 0 |
| ENST00000300664 | 1 | 0 | 1 | 0 | 1 | 0 |
| ENST00000300671 | 1 | 0 | 1 | 0 | 0 | 0 |
| ENST00000300680 | 1 | 0 | 1 | 0 | 1 | 1 |
| ENST00000300723 | 1 | 1 | 1 | 1 | 0 | 0 |
| ENST00000300729 | 1 | 0 | 1 | 1 | 1 | 0 |
| ENST00000300734 | 1 | 0 | 1 | 0 | 1 | 0 |
| ENST00000300759 | 1 | 0 | 1 | 1 | 0 | 0 |
| ENST00000300760 | 1 | 1 | 1 | 1 | 0 | 0 |
| ENST00000300766 | 1 | 0 | 1 | 0 | 0 | 0 |
| ENST00000300779 | 1 | 1 | 1 | 1 | 0 | 1 |
| ENST00000300811 | 1 | 1 | 1 | 1 | 0 | 0 |
| ENST00000300831 | 1 | 0 | 0 | 0 | 0 | 1 |
| ENST00000300923 | 1 | 0 | 0 | 0 | 0 | 0 |
| ENST00000300979 | 1 | 0 | 1 | 0 | 0 | 1 |
| ENST00000301013 | 1 | 0 | 1 | 0 | 0 | 0 |
| ENST00000301041 | 1 | 0 | 1 | 0 | 0 | 0 |
| ENST00000301097 | 1 | 0 | 1 | 0 | 0 | 0 |
| ENST00000301124 | 1 | 0 | 1 | 0 | 0 | 0 |
| ENST00000301151 | 1 | 0 | 1 | 0 | 0 | 1 |
| ENST00000301162 | 1 | 0 | 1 | 0 | 1 | 1 |
| ENST00000301354 | 1 | 0 | 1 | 0 | 0 | 0 |
| ENST00000301382 | 1 | 1 | 1 | 1 | 0 | 0 |
| ENST00000301394 | 1 | 0 | 1 | 0 | 0 | 0 |
| ENST00000301456 | 1 | 1 | 1 | 1 | 0 | 0 |
| ENST00000301477 | 1 | 1 | 1 | 0 | 0 | 1 |
| ENST00000301500 | 1 | 1 | 0 | 0 | 0 | 0 |
| ENST00000301505 | 1 | 0 | 1 | 1 | 1 | 1 |
| ENST00000301513 | 1 | 0 | 1 | 1 | 1 | 1 |
| ENST00000301529 | 1 | 0 | 1 | 0 | 0 | 0 |
| ENST00000301531 | 1 | 0 | 1 | 0 | 0 | 0 |
| ENST00000301563 | 1 | 0 | 1 | 0 | 0 | 0 |

|                 |   |   |   |   |   |   |
|-----------------|---|---|---|---|---|---|
| ENST00000301629 | 1 | 0 | 1 | 0 | 0 | 1 |
| ENST00000301630 | 1 | 0 | 1 | 0 | 0 | 0 |
| ENST00000301635 | 1 | 0 | 1 | 0 | 0 | 0 |
| ENST00000301644 | 1 | 1 | 1 | 1 | 1 | 1 |
| ENST00000301682 | 1 | 0 | 1 | 0 | 0 | 0 |
| ENST00000301688 | 1 | 0 | 1 | 0 | 0 | 0 |
| ENST00000301690 | 1 | 0 | 1 | 0 | 1 | 1 |
| ENST00000301695 | 1 | 0 | 1 | 1 | 0 | 0 |
| ENST00000301698 | 1 | 0 | 1 | 0 | 0 | 1 |
| ENST00000301699 | 1 | 1 | 0 | 0 | 0 | 1 |
| ENST00000301701 | 1 | 0 | 1 | 0 | 0 | 0 |
| ENST00000301702 | 1 | 0 | 1 | 0 | 0 | 0 |
| ENST00000301715 | 1 | 0 | 1 | 0 | 0 | 0 |
| ENST00000301718 | 1 | 0 | 1 | 1 | 1 | 0 |
| ENST00000301730 | 1 | 1 | 1 | 1 | 0 | 0 |
| ENST00000301733 | 1 | 0 | 1 | 1 | 1 | 1 |
| ENST00000301742 | 1 | 1 | 1 | 1 | 0 | 1 |
| ENST00000301827 | 1 | 1 | 1 | 0 | 1 | 1 |
| ENST00000301844 | 1 | 0 | 1 | 0 | 0 | 1 |
| ENST00000301907 | 1 | 0 | 1 | 0 | 0 | 1 |
| K03208          | 1 | 0 | 1 | 0 | 0 | 0 |
| L07393          | 1 | 0 | 1 | 0 | 0 | 1 |
| L07517          | 1 | 1 | 1 | 1 | 0 | 0 |
| L07518          | 1 | 0 | 1 | 0 | 0 | 0 |
| L08240          | 1 | 0 | 1 | 1 | 0 | 1 |
| L08436          | 1 | 0 | 1 | 1 | 1 | 1 |
| L12086          | 1 | 0 | 1 | 0 | 0 | 1 |
| L13433          | 1 | 0 | 0 | 0 | 0 | 1 |
| L21961          | 1 | 0 | 1 | 1 | 0 | 0 |
| L23311          | 1 | 0 | 1 | 0 | 0 | 1 |
| L23563          | 1 | 0 | 1 | 0 | 0 | 0 |
| L25628          | 1 | 0 | 1 | 1 | 0 | 1 |
| L25629          | 1 | 1 | 1 | 1 | 0 | 1 |
| L27560          | 1 | 1 | 1 | 1 | 0 | 0 |
| L29162          | 1 | 0 | 1 | 0 | 0 | 1 |
| L32606          | 1 | 1 | 0 | 0 | 0 | 0 |
| L34729          | 1 | 1 | 0 | 0 | 0 | 1 |
| L36531          | 0 | 1 | 0 | 0 | 0 | 0 |
| L37198          | 1 | 0 | 1 | 0 | 1 | 1 |
| L37699          | 1 | 0 | 1 | 0 | 0 | 0 |
| L37702          | 1 | 0 | 1 | 1 | 0 | 0 |
| L40392          | 1 | 0 | 1 | 1 | 1 | 1 |
| L40521          | 1 | 0 | 1 | 1 | 0 | 0 |
| L76566          | 1 | 1 | 1 | 0 | 1 | 1 |
| L77565          | 1 | 0 | 1 | 1 | 0 | 0 |
| L77571          | 0 | 0 | 1 | 0 | 0 | 0 |
| M12025          | 1 | 0 | 1 | 0 | 0 | 1 |
| M12959          | 1 | 1 | 1 | 1 | 0 | 1 |
| M17204          | 1 | 0 | 1 | 0 | 0 | 1 |
| M24355          | 1 | 0 | 1 | 0 | 0 | 1 |
| M27343          | 1 | 0 | 1 | 0 | 0 | 1 |
| M29873          | 1 | 0 | 1 | 0 | 0 | 0 |

|           |   |   |   |   |   |   |
|-----------|---|---|---|---|---|---|
| M30474    | 1 | 0 | 1 | 0 | 0 | 0 |
| M32220    | 1 | 0 | 1 | 0 | 0 | 0 |
| M37712    | 1 | 1 | 1 | 1 | 1 | 1 |
| M55406    | 1 | 0 | 1 | 0 | 0 | 0 |
| M63256    | 1 | 1 | 1 | 1 | 0 | 1 |
| M63438    | 1 | 0 | 1 | 0 | 1 | 1 |
| M64258    | 1 | 0 | 1 | 0 | 0 | 1 |
| M64486    | 0 | 1 | 0 | 1 | 0 | 0 |
| M65066    | 1 | 1 | 1 | 1 | 0 | 0 |
| M69181    | 1 | 0 | 1 | 0 | 0 | 0 |
| M80899    | 1 | 1 | 1 | 1 | 1 | 1 |
| M87789    | 1 | 1 | 1 | 0 | 0 | 1 |
| M96843    | 1 | 1 | 1 | 1 | 1 | 0 |
| M97496    | 1 | 0 | 1 | 0 | 0 | 0 |
| N57936_RC | 1 | 0 | 0 | 0 | 0 | 1 |
| N70459_RC | 1 | 0 | 0 | 0 | 0 | 0 |
| NM_000016 | 1 | 0 | 1 | 1 | 0 | 0 |
| NM_000017 | 1 | 0 | 1 | 1 | 1 | 0 |
| NM_000018 | 1 | 0 | 1 | 1 | 1 | 1 |
| NM_000019 | 1 | 0 | 1 | 1 | 0 | 1 |
| NM_000020 | 1 | 0 | 0 | 0 | 0 | 1 |
| NM_000022 | 1 | 0 | 1 | 1 | 0 | 1 |
| NM_000023 | 1 | 0 | 1 | 1 | 0 | 1 |
| NM_000024 | 1 | 1 | 1 | 1 | 1 | 1 |
| NM_000025 | 1 | 1 | 0 | 1 | 0 | 0 |
| NM_000026 | 1 | 0 | 1 | 0 | 0 | 0 |
| NM_000027 | 1 | 0 | 1 | 1 | 0 | 0 |
| NM_000028 | 1 | 0 | 1 | 1 | 1 | 1 |
| NM_000029 | 1 | 0 | 0 | 0 | 0 | 1 |
| NM_000030 | 1 | 0 | 1 | 0 | 0 | 0 |
| NM_000031 | 1 | 0 | 1 | 1 | 0 | 0 |
| NM_000032 | 1 | 0 | 1 | 0 | 0 | 1 |
| NM_000033 | 1 | 0 | 1 | 0 | 0 | 0 |
| NM_000034 | 1 | 0 | 1 | 1 | 0 | 0 |
| NM_000036 | 1 | 0 | 1 | 0 | 0 | 0 |
| NM_000038 | 1 | 1 | 1 | 1 | 0 | 1 |
| NM_000039 | 0 | 0 | 0 | 1 | 0 | 0 |
| NM_000040 | 0 | 0 | 1 | 0 | 0 | 0 |
| NM_000041 | 1 | 0 | 1 | 0 | 0 | 0 |
| NM_000042 | 0 | 0 | 0 | 0 | 0 | 1 |
| NM_000043 | 1 | 0 | 1 | 0 | 1 | 1 |
| NM_000044 | 1 | 0 | 1 | 1 | 1 | 1 |
| NM_000045 | 1 | 1 | 1 | 1 | 0 | 1 |
| NM_000046 | 1 | 0 | 1 | 0 | 0 | 0 |
| NM_000047 | 1 | 0 | 1 | 0 | 0 | 0 |
| NM_000048 | 1 | 1 | 1 | 1 | 0 | 1 |
| NM_000049 | 1 | 0 | 1 | 0 | 0 | 1 |
| NM_000050 | 1 | 1 | 1 | 1 | 0 | 1 |
| NM_000051 | 1 | 0 | 1 | 0 | 0 | 1 |
| NM_000052 | 1 | 1 | 1 | 1 | 0 | 0 |
| NM_000053 | 1 | 0 | 1 | 1 | 1 | 1 |
| NM_000054 | 1 | 0 | 1 | 0 | 0 | 0 |

|           |   |   |   |   |   |   |
|-----------|---|---|---|---|---|---|
| NM_000055 | 1 | 0 | 0 | 0 | 0 | 1 |
| NM_000056 | 1 | 1 | 1 | 1 | 0 | 1 |
| NM_000057 | 1 | 1 | 1 | 1 | 1 | 1 |
| NM_000059 | 1 | 0 | 1 | 0 | 0 | 1 |
| NM_000060 | 1 | 0 | 1 | 1 | 1 | 1 |
| NM_000061 | 1 | 1 | 1 | 1 | 0 | 0 |
| NM_000062 | 1 | 1 | 1 | 0 | 1 | 1 |
| NM_000063 | 1 | 0 | 1 | 1 | 1 | 1 |
| NM_000064 | 1 | 0 | 1 | 0 | 0 | 1 |
| NM_000066 | 0 | 0 | 0 | 1 | 0 | 0 |
| NM_000067 | 1 | 0 | 1 | 1 | 0 | 0 |
| NM_000069 | 1 | 0 | 1 | 0 | 0 | 0 |
| NM_000070 | 1 | 0 | 1 | 0 | 0 | 0 |
| NM_000071 | 1 | 0 | 1 | 1 | 0 | 0 |
| NM_000072 | 1 | 1 | 1 | 1 | 1 | 0 |
| NM_000073 | 1 | 0 | 1 | 1 | 0 | 1 |
| NM_000074 | 1 | 0 | 1 | 1 | 0 | 0 |
| NM_000076 | 1 | 1 | 1 | 1 | 0 | 1 |
| NM_000078 | 1 | 1 | 1 | 1 | 0 | 1 |
| NM_000079 | 1 | 0 | 1 | 1 | 0 | 0 |
| NM_000080 | 1 | 0 | 1 | 0 | 0 | 0 |
| NM_000081 | 1 | 0 | 1 | 0 | 1 | 1 |
| NM_000082 | 1 | 0 | 1 | 1 | 1 | 1 |
| NM_000083 | 1 | 0 | 1 | 0 | 0 | 0 |
| NM_000084 | 1 | 1 | 1 | 1 | 0 | 0 |
| NM_000085 | 1 | 1 | 1 | 1 | 0 | 1 |
| NM_000086 | 1 | 1 | 1 | 1 | 0 | 0 |
| NM_000087 | 1 | 0 | 0 | 0 | 0 | 0 |
| NM_000089 | 0 | 0 | 0 | 0 | 0 | 1 |
| NM_000091 | 1 | 0 | 1 | 0 | 1 | 0 |
| NM_000092 | 1 | 1 | 1 | 1 | 1 | 1 |
| NM_000094 | 1 | 0 | 1 | 1 | 0 | 0 |
| NM_000095 | 1 | 0 | 1 | 0 | 0 | 0 |
| NM_000096 | 0 | 1 | 1 | 1 | 0 | 0 |
| NM_000097 | 1 | 0 | 1 | 0 | 0 | 1 |
| NM_000098 | 1 | 1 | 1 | 0 | 0 | 1 |
| NM_000099 | 1 | 1 | 1 | 1 | 0 | 1 |
| NM_000100 | 1 | 1 | 1 | 1 | 1 | 1 |
| NM_000101 | 1 | 0 | 1 | 1 | 1 | 1 |
| NM_000102 | 1 | 1 | 1 | 1 | 0 | 0 |
| NM_000103 | 1 | 0 | 1 | 0 | 0 | 0 |
| NM_000104 | 1 | 1 | 1 | 1 | 0 | 1 |
| NM_000106 | 1 | 0 | 0 | 0 | 0 | 1 |
| NM_000107 | 1 | 0 | 1 | 1 | 1 | 1 |
| NM_000108 | 1 | 0 | 1 | 0 | 0 | 0 |
| NM_000110 | 1 | 0 | 1 | 0 | 1 | 0 |
| NM_000111 | 0 | 0 | 0 | 1 | 0 | 0 |
| NM_000112 | 1 | 0 | 1 | 1 | 0 | 0 |
| NM_000113 | 1 | 0 | 1 | 1 | 0 | 0 |
| NM_000114 | 1 | 0 | 1 | 0 | 0 | 1 |
| NM_000115 | 0 | 0 | 0 | 1 | 0 | 0 |
| NM_000117 | 1 | 0 | 1 | 0 | 1 | 1 |

|           |   |   |   |   |   |   |
|-----------|---|---|---|---|---|---|
| NM_000118 | 1 | 1 | 1 | 1 | 0 | 1 |
| NM_000119 | 1 | 0 | 1 | 0 | 0 | 0 |
| NM_000120 | 1 | 1 | 1 | 0 | 0 | 0 |
| NM_000121 | 1 | 1 | 1 | 1 | 0 | 1 |
| NM_000122 | 1 | 1 | 1 | 1 | 0 | 1 |
| NM_000123 | 1 | 0 | 1 | 1 | 0 | 0 |
| NM_000124 | 1 | 0 | 1 | 1 | 0 | 0 |
| NM_000125 | 1 | 1 | 1 | 1 | 1 | 0 |
| NM_000126 | 1 | 0 | 1 | 1 | 0 | 1 |
| NM_000127 | 1 | 1 | 1 | 1 | 0 | 1 |
| NM_000128 | 1 | 0 | 1 | 0 | 0 | 1 |
| NM_000129 | 1 | 1 | 1 | 1 | 0 | 1 |
| NM_000130 | 1 | 0 | 1 | 0 | 1 | 1 |
| NM_000131 | 0 | 0 | 0 | 0 | 0 | 1 |
| NM_000133 | 0 | 0 | 0 | 1 | 0 | 0 |
| NM_000134 | 1 | 0 | 1 | 0 | 0 | 0 |
| NM_000135 | 1 | 1 | 1 | 1 | 1 | 1 |
| NM_000136 | 1 | 1 | 1 | 1 | 0 | 0 |
| NM_000137 | 1 | 1 | 1 | 1 | 0 | 1 |
| NM_000138 | 1 | 0 | 1 | 0 | 0 | 0 |
| NM_000139 | 1 | 0 | 1 | 0 | 0 | 0 |
| NM_000140 | 1 | 0 | 1 | 0 | 0 | 0 |
| NM_000141 | 1 | 1 | 1 | 1 | 0 | 1 |
| NM_000142 | 1 | 1 | 1 | 1 | 0 | 0 |
| NM_000143 | 1 | 1 | 1 | 1 | 0 | 1 |
| NM_000144 | 1 | 0 | 1 | 0 | 0 | 0 |
| NM_000146 | 1 | 1 | 1 | 1 | 1 | 1 |
| NM_000147 | 1 | 1 | 1 | 1 | 0 | 1 |
| NM_000148 | 1 | 0 | 1 | 0 | 0 | 0 |
| NM_000149 | 1 | 0 | 1 | 0 | 0 | 0 |
| NM_000150 | 1 | 0 | 0 | 0 | 0 | 1 |
| NM_000151 | 1 | 0 | 1 | 1 | 0 | 0 |
| NM_000152 | 1 | 1 | 1 | 1 | 0 | 1 |
| NM_000153 | 1 | 0 | 1 | 1 | 0 | 1 |
| NM_000154 | 1 | 1 | 1 | 0 | 0 | 1 |
| NM_000155 | 1 | 1 | 1 | 1 | 0 | 0 |
| NM_000156 | 1 | 1 | 1 | 0 | 0 | 1 |
| NM_000157 | 1 | 1 | 1 | 1 | 0 | 1 |
| NM_000158 | 1 | 1 | 1 | 1 | 0 | 1 |
| NM_000159 | 1 | 1 | 1 | 0 | 0 | 1 |
| NM_000160 | 1 | 1 | 1 | 1 | 0 | 1 |
| NM_000161 | 1 | 0 | 1 | 1 | 1 | 1 |
| NM_000162 | 1 | 0 | 1 | 0 | 0 | 0 |
| NM_000165 | 1 | 1 | 1 | 1 | 0 | 0 |
| NM_000166 | 1 | 0 | 1 | 0 | 0 | 0 |
| NM_000167 | 1 | 1 | 1 | 1 | 1 | 1 |
| NM_000168 | 1 | 0 | 1 | 1 | 1 | 1 |
| NM_000169 | 1 | 0 | 1 | 1 | 1 | 1 |
| NM_000170 | 1 | 0 | 1 | 0 | 1 | 1 |
| NM_000171 | 0 | 0 | 1 | 1 | 0 | 0 |
| NM_000172 | 1 | 1 | 1 | 1 | 0 | 0 |
| NM_000173 | 1 | 1 | 1 | 1 | 0 | 0 |

|           |   |   |   |   |   |   |
|-----------|---|---|---|---|---|---|
| NM_000174 | 1 | 0 | 1 | 1 | 0 | 0 |
| NM_000175 | 1 | 1 | 1 | 1 | 0 | 0 |
| NM_000176 | 1 | 1 | 1 | 1 | 1 | 1 |
| NM_000177 | 1 | 1 | 1 | 1 | 1 | 1 |
| NM_000178 | 1 | 1 | 1 | 1 | 0 | 0 |
| NM_000179 | 1 | 1 | 1 | 1 | 0 | 1 |
| NM_000180 | 1 | 0 | 1 | 0 | 0 | 0 |
| NM_000181 | 1 | 0 | 1 | 0 | 0 | 0 |
| NM_000182 | 1 | 1 | 1 | 1 | 0 | 0 |
| NM_000183 | 1 | 0 | 1 | 1 | 0 | 1 |
| NM_000184 | 1 | 0 | 1 | 0 | 0 | 0 |
| NM_000186 | 1 | 0 | 1 | 0 | 0 | 0 |
| NM_000187 | 1 | 1 | 1 | 1 | 1 | 1 |
| NM_000188 | 1 | 1 | 1 | 1 | 0 | 0 |
| NM_000189 | 1 | 0 | 1 | 0 | 0 | 1 |
| NM_000190 | 1 | 1 | 1 | 1 | 0 | 0 |
| NM_000191 | 1 | 0 | 1 | 0 | 1 | 0 |
| NM_000193 | 1 | 0 | 1 | 0 | 0 | 0 |
| NM_000194 | 1 | 0 | 1 | 0 | 0 | 1 |
| NM_000195 | 1 | 1 | 1 | 0 | 0 | 1 |
| NM_000197 | 1 | 0 | 1 | 0 | 1 | 1 |
| NM_000199 | 1 | 1 | 1 | 1 | 0 | 0 |
| NM_000200 | 1 | 0 | 0 | 0 | 0 | 1 |
| NM_000201 | 1 | 0 | 1 | 0 | 0 | 1 |
| NM_000202 | 1 | 0 | 1 | 1 | 0 | 1 |
| NM_000203 | 1 | 0 | 1 | 0 | 0 | 0 |
| NM_000204 | 0 | 0 | 1 | 0 | 0 | 0 |
| NM_000206 | 1 | 0 | 1 | 1 | 1 | 0 |
| NM_000207 | 0 | 1 | 0 | 0 | 0 | 1 |
| NM_000208 | 1 | 0 | 1 | 0 | 0 | 0 |
| NM_000209 | 1 | 0 | 1 | 1 | 0 | 0 |
| NM_000210 | 1 | 1 | 1 | 1 | 1 | 1 |
| NM_000211 | 1 | 1 | 1 | 1 | 1 | 1 |
| NM_000212 | 1 | 0 | 1 | 0 | 0 | 0 |
| NM_000213 | 1 | 0 | 0 | 0 | 0 | 1 |
| NM_000214 | 1 | 1 | 1 | 1 | 1 | 1 |
| NM_000215 | 1 | 0 | 1 | 1 | 0 | 0 |
| NM_000216 | 1 | 1 | 1 | 1 | 0 | 0 |
| NM_000218 | 1 | 1 | 1 | 1 | 0 | 1 |
| NM_000219 | 1 | 0 | 0 | 1 | 0 | 0 |
| NM_000220 | 1 | 0 | 1 | 0 | 0 | 0 |
| NM_000222 | 1 | 1 | 1 | 1 | 1 | 1 |
| NM_000224 | 1 | 0 | 1 | 1 | 1 | 1 |
| NM_000226 | 1 | 0 | 1 | 0 | 0 | 0 |
| NM_000227 | 1 | 0 | 1 | 1 | 0 | 1 |
| NM_000228 | 1 | 1 | 1 | 1 | 1 | 1 |
| NM_000229 | 1 | 1 | 1 | 1 | 1 | 1 |
| NM_000230 | 1 | 0 | 1 | 0 | 1 | 1 |
| NM_000231 | 1 | 0 | 1 | 0 | 0 | 0 |
| NM_000232 | 1 | 0 | 1 | 0 | 0 | 0 |
| NM_000234 | 1 | 0 | 1 | 0 | 0 | 1 |
| NM_000235 | 1 | 1 | 1 | 1 | 0 | 1 |



|           |   |   |   |   |   |   |
|-----------|---|---|---|---|---|---|
| NM_000236 | 1 | 0 | 1 | 0 | 0 | 1 |
| NM_000237 | 1 | 1 | 1 | 0 | 0 | 0 |
| NM_000238 | 1 | 1 | 1 | 1 | 1 | 0 |
| NM_000239 | 1 | 0 | 0 | 0 | 0 | 0 |
| NM_000240 | 1 | 0 | 1 | 0 | 0 | 0 |
| NM_000242 | 1 | 0 | 0 | 0 | 0 | 0 |
| NM_000243 | 1 | 0 | 1 | 1 | 0 | 0 |
| NM_000245 | 1 | 0 | 1 | 1 | 0 | 0 |
| NM_000246 | 1 | 1 | 1 | 1 | 0 | 0 |
| NM_000247 | 1 | 0 | 1 | 1 | 0 | 0 |
| NM_000248 | 1 | 1 | 1 | 1 | 0 | 1 |
| NM_000249 | 1 | 0 | 1 | 1 | 1 | 1 |
| NM_000250 | 1 | 1 | 1 | 1 | 0 | 0 |
| NM_000251 | 1 | 0 | 1 | 1 | 1 | 1 |
| NM_000252 | 1 | 0 | 1 | 0 | 0 | 0 |
| NM_000253 | 0 | 0 | 1 | 0 | 0 | 0 |
| NM_000254 | 1 | 0 | 1 | 1 | 1 | 1 |
| NM_000255 | 1 | 1 | 1 | 1 | 1 | 1 |
| NM_000256 | 1 | 1 | 1 | 1 | 0 | 1 |
| NM_000257 | 0 | 0 | 0 | 0 | 0 | 1 |
| NM_000258 | 0 | 0 | 0 | 0 | 0 | 1 |
| NM_000259 | 1 | 0 | 1 | 0 | 1 | 1 |
| NM_000260 | 1 | 1 | 1 | 1 | 1 | 0 |
| NM_000261 | 0 | 0 | 0 | 0 | 0 | 1 |
| NM_000262 | 1 | 1 | 1 | 1 | 0 | 0 |
| NM_000263 | 1 | 1 | 1 | 1 | 0 | 0 |
| NM_000264 | 1 | 0 | 1 | 1 | 1 | 1 |
| NM_000265 | 1 | 0 | 1 | 0 | 0 | 0 |
| NM_000267 | 1 | 0 | 0 | 0 | 0 | 0 |
| NM_000269 | 1 | 1 | 1 | 1 | 1 | 1 |
| NM_000270 | 1 | 0 | 1 | 1 | 0 | 0 |
| NM_000271 | 1 | 0 | 1 | 0 | 1 | 1 |
| NM_000272 | 1 | 0 | 1 | 0 | 0 | 1 |
| NM_000273 | 1 | 0 | 0 | 0 | 0 | 0 |
| NM_000274 | 1 | 0 | 1 | 0 | 0 | 1 |
| NM_000275 | 1 | 0 | 1 | 0 | 0 | 0 |
| NM_000276 | 1 | 1 | 1 | 1 | 0 | 0 |
| NM_000277 | 1 | 0 | 1 | 0 | 0 | 0 |
| NM_000280 | 1 | 0 | 0 | 0 | 0 | 1 |
| NM_000281 | 1 | 0 | 1 | 0 | 0 | 0 |
| NM_000282 | 1 | 0 | 1 | 0 | 0 | 0 |
| NM_000283 | 1 | 1 | 1 | 1 | 1 | 1 |
| NM_000284 | 1 | 1 | 1 | 1 | 1 | 1 |
| NM_000285 | 1 | 1 | 1 | 1 | 0 | 0 |
| NM_000286 | 1 | 0 | 1 | 1 | 1 | 1 |
| NM_000287 | 1 | 0 | 1 | 0 | 0 | 0 |
| NM_000288 | 1 | 1 | 1 | 1 | 1 | 1 |
| NM_000289 | 1 | 1 | 1 | 1 | 0 | 1 |
| NM_000290 | 1 | 0 | 0 | 0 | 0 | 0 |
| NM_000291 | 1 | 1 | 1 | 1 | 1 | 0 |
| NM_000292 | 1 | 0 | 1 | 1 | 0 | 1 |
| NM_000293 | 1 | 1 | 1 | 0 | 0 | 0 |

|           |   |   |   |   |   |   |
|-----------|---|---|---|---|---|---|
| NM_000294 | 1 | 1 | 1 | 1 | 0 | 0 |
| NM_000295 | 1 | 1 | 1 | 1 | 0 | 0 |
| NM_000296 | 1 | 0 | 1 | 1 | 0 | 0 |
| NM_000297 | 1 | 0 | 1 | 0 | 0 | 1 |
| NM_000298 | 1 | 0 | 1 | 1 | 1 | 0 |
| NM_000301 | 1 | 1 | 1 | 1 | 0 | 0 |
| NM_000302 | 1 | 1 | 1 | 1 | 1 | 0 |
| NM_000303 | 1 | 1 | 1 | 1 | 0 | 0 |
| NM_000304 | 1 | 1 | 1 | 1 | 0 | 1 |
| NM_000305 | 1 | 1 | 1 | 1 | 1 | 1 |
| NM_000306 | 1 | 1 | 1 | 0 | 0 | 0 |
| NM_000307 | 1 | 0 | 1 | 0 | 0 | 0 |
| NM_000308 | 1 | 1 | 1 | 1 | 1 | 1 |
| NM_000309 | 1 | 0 | 1 | 1 | 1 | 1 |
| NM_000310 | 1 | 1 | 1 | 0 | 0 | 0 |
| NM_000311 | 1 | 1 | 1 | 1 | 0 | 0 |
| NM_000312 | 1 | 1 | 1 | 1 | 0 | 1 |
| NM_000313 | 1 | 0 | 1 | 0 | 0 | 1 |
| NM_000314 | 1 | 1 | 1 | 1 | 1 | 1 |
| NM_000316 | 0 | 0 | 0 | 0 | 0 | 1 |
| NM_000317 | 1 | 0 | 1 | 1 | 1 | 1 |
| NM_000318 | 1 | 0 | 1 | 0 | 1 | 1 |
| NM_000319 | 1 | 1 | 1 | 1 | 0 | 1 |
| NM_000320 | 1 | 0 | 1 | 0 | 1 | 0 |
| NM_000321 | 1 | 0 | 1 | 0 | 0 | 0 |
| NM_000322 | 1 | 1 | 1 | 1 | 0 | 1 |
| NM_000323 | 1 | 0 | 1 | 0 | 0 | 0 |
| NM_000324 | 1 | 0 | 1 | 0 | 0 | 0 |
| NM_000325 | 0 | 0 | 1 | 0 | 0 | 0 |
| NM_000326 | 0 | 1 | 0 | 0 | 0 | 0 |
| NM_000327 | 1 | 0 | 1 | 0 | 0 | 0 |
| NM_000328 | 1 | 1 | 1 | 1 | 0 | 0 |
| NM_000330 | 1 | 0 | 0 | 0 | 0 | 1 |
| NM_000332 | 1 | 1 | 1 | 1 | 1 | 1 |
| NM_000333 | 1 | 0 | 1 | 0 | 0 | 1 |
| NM_000334 | 0 | 1 | 1 | 1 | 0 | 0 |
| NM_000335 | 1 | 0 | 1 | 0 | 0 | 1 |
| NM_000336 | 1 | 0 | 1 | 1 | 0 | 0 |
| NM_000337 | 0 | 1 | 1 | 0 | 0 | 0 |
| NM_000338 | 1 | 0 | 1 | 0 | 0 | 1 |
| NM_000339 | 1 | 0 | 1 | 0 | 0 | 0 |
| NM_000340 | 1 | 0 | 0 | 0 | 0 | 0 |
| NM_000341 | 1 | 0 | 1 | 0 | 0 | 0 |
| NM_000342 | 1 | 0 | 1 | 1 | 1 | 0 |
| NM_000343 | 0 | 1 | 0 | 0 | 0 | 1 |
| NM_000344 | 1 | 0 | 1 | 0 | 0 | 0 |
| NM_000345 | 1 | 1 | 1 | 1 | 1 | 1 |
| NM_000346 | 1 | 0 | 1 | 0 | 0 | 0 |
| NM_000347 | 1 | 0 | 1 | 0 | 0 | 1 |
| NM_000348 | 0 | 1 | 0 | 1 | 0 | 0 |
| NM_000352 | 1 | 0 | 1 | 0 | 0 | 1 |
| NM_000353 | 1 | 0 | 1 | 0 | 0 | 0 |

|           |   |   |   |   |   |   |
|-----------|---|---|---|---|---|---|
| NM_000354 | 0 | 1 | 0 | 1 | 0 | 0 |
| NM_000355 | 1 | 1 | 1 | 0 | 1 | 1 |
| NM_000356 | 1 | 0 | 1 | 0 | 0 | 0 |
| NM_000358 | 1 | 1 | 1 | 1 | 0 | 1 |
| NM_000359 | 1 | 1 | 1 | 0 | 1 | 0 |
| NM_000360 | 1 | 1 | 1 | 0 | 0 | 1 |
| NM_000361 | 1 | 1 | 1 | 1 | 0 | 1 |
| NM_000362 | 1 | 0 | 1 | 0 | 0 | 0 |
| NM_000363 | 1 | 1 | 1 | 1 | 0 | 1 |
| NM_000364 | 1 | 1 | 1 | 0 | 0 | 0 |
| NM_000365 | 1 | 1 | 1 | 1 | 1 | 0 |
| NM_000366 | 1 | 1 | 1 | 1 | 0 | 0 |
| NM_000367 | 1 | 0 | 1 | 0 | 0 | 1 |
| NM_000368 | 1 | 0 | 1 | 0 | 0 | 0 |
| NM_000369 | 0 | 0 | 0 | 0 | 0 | 1 |
| NM_000370 | 1 | 0 | 0 | 0 | 0 | 1 |
| NM_000374 | 1 | 1 | 1 | 1 | 0 | 1 |
| NM_000375 | 1 | 1 | 1 | 1 | 0 | 0 |
| NM_000376 | 1 | 1 | 1 | 1 | 1 | 1 |
| NM_000377 | 1 | 0 | 1 | 1 | 1 | 1 |
| NM_000379 | 0 | 0 | 1 | 0 | 0 | 0 |
| NM_000380 | 1 | 0 | 1 | 1 | 1 | 1 |
| NM_000381 | 1 | 0 | 1 | 1 | 0 | 0 |
| NM_000382 | 1 | 1 | 1 | 1 | 0 | 0 |
| NM_000383 | 1 | 1 | 1 | 1 | 1 | 1 |
| NM_000385 | 1 | 1 | 1 | 1 | 0 | 0 |
| NM_000386 | 1 | 0 | 1 | 1 | 0 | 1 |
| NM_000387 | 1 | 1 | 1 | 1 | 1 | 1 |
| NM_000388 | 0 | 0 | 1 | 0 | 0 | 0 |
| NM_000389 | 1 | 1 | 1 | 1 | 0 | 0 |
| NM_000390 | 1 | 0 | 1 | 0 | 0 | 0 |
| NM_000391 | 1 | 1 | 1 | 1 | 0 | 0 |
| NM_000392 | 1 | 1 | 1 | 0 | 1 | 1 |
| NM_000393 | 1 | 0 | 1 | 0 | 0 | 1 |
| NM_000394 | 1 | 0 | 1 | 1 | 1 | 0 |
| NM_000395 | 1 | 1 | 1 | 1 | 1 | 1 |
| NM_000396 | 1 | 1 | 1 | 1 | 1 | 1 |
| NM_000397 | 1 | 1 | 1 | 1 | 1 | 1 |
| NM_000398 | 1 | 0 | 1 | 0 | 0 | 1 |
| NM_000399 | 1 | 1 | 1 | 1 | 1 | 1 |
| NM_000400 | 1 | 1 | 1 | 1 | 0 | 1 |
| NM_000401 | 1 | 0 | 1 | 0 | 0 | 0 |
| NM_000402 | 1 | 0 | 1 | 1 | 0 | 0 |
| NM_000403 | 1 | 0 | 1 | 1 | 1 | 1 |
| NM_000404 | 1 | 0 | 1 | 0 | 0 | 0 |
| NM_000405 | 1 | 0 | 1 | 1 | 0 | 0 |
| NM_000406 | 0 | 0 | 0 | 0 | 0 | 1 |
| NM_000407 | 1 | 0 | 1 | 0 | 0 | 0 |
| NM_000408 | 1 | 0 | 1 | 0 | 1 | 1 |
| NM_000409 | 0 | 0 | 0 | 0 | 0 | 1 |
| NM_000411 | 1 | 0 | 1 | 0 | 0 | 0 |
| NM_000412 | 0 | 1 | 0 | 0 | 0 | 1 |

|           |   |   |   |   |   |   |
|-----------|---|---|---|---|---|---|
| NM_000413 | 1 | 1 | 1 | 1 | 0 | 0 |
| NM_000414 | 1 | 1 | 1 | 1 | 0 | 0 |
| NM_000416 | 1 | 1 | 1 | 1 | 0 | 1 |
| NM_000417 | 1 | 1 | 1 | 1 | 0 | 1 |
| NM_000418 | 1 | 0 | 1 | 0 | 1 | 1 |
| NM_000419 | 1 | 0 | 1 | 0 | 0 | 1 |
| NM_000420 | 1 | 0 | 1 | 1 | 0 | 0 |
| NM_000421 | 1 | 0 | 1 | 1 | 0 | 1 |
| NM_000423 | 1 | 0 | 1 | 1 | 0 | 1 |
| NM_000424 | 1 | 0 | 1 | 0 | 1 | 1 |
| NM_000425 | 1 | 0 | 0 | 0 | 0 | 0 |
| NM_000426 | 1 | 1 | 1 | 1 | 0 | 0 |
| NM_000427 | 1 | 1 | 0 | 0 | 0 | 1 |
| NM_000428 | 1 | 0 | 1 | 0 | 0 | 0 |
| NM_000429 | 1 | 0 | 1 | 1 | 0 | 1 |
| NM_000430 | 1 | 0 | 1 | 0 | 1 | 1 |
| NM_000431 | 1 | 1 | 1 | 1 | 0 | 1 |
| NM_000432 | 1 | 0 | 0 | 0 | 1 | 0 |
| NM_000434 | 1 | 0 | 1 | 1 | 0 | 0 |
| NM_000435 | 1 | 0 | 1 | 1 | 0 | 0 |
| NM_000436 | 1 | 0 | 1 | 1 | 1 | 1 |
| NM_000437 | 1 | 1 | 1 | 0 | 0 | 0 |
| NM_000439 | 0 | 0 | 0 | 0 | 0 | 1 |
| NM_000441 | 0 | 0 | 0 | 0 | 0 | 1 |
| NM_000442 | 1 | 1 | 1 | 1 | 0 | 1 |
| NM_000443 | 1 | 0 | 1 | 1 | 1 | 0 |
| NM_000444 | 1 | 0 | 1 | 1 | 0 | 0 |
| NM_000445 | 1 | 1 | 1 | 1 | 0 | 0 |
| NM_000447 | 1 | 1 | 1 | 1 | 1 | 0 |
| NM_000448 | 1 | 0 | 0 | 0 | 0 | 1 |
| NM_000449 | 1 | 0 | 1 | 1 | 0 | 1 |
| NM_000452 | 0 | 0 | 0 | 0 | 0 | 1 |
| NM_000453 | 1 | 1 | 1 | 1 | 0 | 0 |
| NM_000454 | 1 | 1 | 1 | 1 | 0 | 1 |
| NM_000455 | 1 | 1 | 1 | 1 | 0 | 0 |
| NM_000456 | 1 | 0 | 1 | 1 | 0 | 0 |
| NM_000458 | 1 | 0 | 0 | 0 | 0 | 0 |
| NM_000459 | 1 | 0 | 1 | 0 | 0 | 0 |
| NM_000461 | 1 | 0 | 1 | 0 | 0 | 0 |
| NM_000462 | 1 | 0 | 1 | 0 | 1 | 1 |
| NM_000463 | 0 | 0 | 0 | 1 | 0 | 0 |
| NM_000465 | 1 | 1 | 1 | 1 | 0 | 0 |
| NM_000466 | 1 | 0 | 1 | 1 | 1 | 1 |
| NM_000474 | 1 | 0 | 1 | 0 | 0 | 1 |
| NM_000476 | 1 | 0 | 1 | 0 | 0 | 0 |
| NM_000477 | 1 | 0 | 0 | 0 | 0 | 1 |
| NM_000478 | 1 | 1 | 1 | 1 | 0 | 1 |
| NM_000479 | 1 | 0 | 1 | 0 | 0 | 0 |
| NM_000480 | 1 | 0 | 1 | 0 | 0 | 1 |
| NM_000481 | 1 | 1 | 1 | 1 | 0 | 0 |
| NM_000482 | 0 | 0 | 1 | 0 | 0 | 0 |
| NM_000483 | 1 | 0 | 0 | 0 | 0 | 0 |

|           |   |   |   |   |   |   |
|-----------|---|---|---|---|---|---|
| NM_000484 | 1 | 1 | 1 | 1 | 0 | 0 |
| NM_000485 | 1 | 1 | 1 | 1 | 0 | 1 |
| NM_000486 | 1 | 0 | 1 | 1 | 1 | 1 |
| NM_000487 | 1 | 0 | 1 | 0 | 0 | 1 |
| NM_000488 | 0 | 0 | 1 | 0 | 0 | 0 |
| NM_000490 | 1 | 0 | 1 | 0 | 0 | 0 |
| NM_000491 | 1 | 0 | 1 | 1 | 0 | 0 |
| NM_000493 | 1 | 0 | 1 | 0 | 0 | 1 |
| NM_000494 | 1 | 0 | 1 | 0 | 0 | 1 |
| NM_000495 | 0 | 0 | 0 | 0 | 0 | 1 |
| NM_000496 | 1 | 0 | 1 | 0 | 0 | 1 |
| NM_000497 | 1 | 0 | 0 | 0 | 0 | 0 |
| NM_000499 | 0 | 0 | 1 | 0 | 0 | 0 |
| NM_000500 | 1 | 1 | 1 | 1 | 0 | 0 |
| NM_000501 | 1 | 0 | 1 | 0 | 0 | 0 |
| NM_000505 | 1 | 1 | 1 | 1 | 0 | 0 |
| NM_000506 | 0 | 0 | 0 | 0 | 0 | 1 |
| NM_000507 | 1 | 0 | 1 | 1 | 0 | 0 |
| NM_000508 | 1 | 1 | 1 | 1 | 0 | 0 |
| NM_000509 | 0 | 0 | 0 | 0 | 0 | 1 |
| NM_000510 | 1 | 1 | 1 | 0 | 0 | 0 |
| NM_000511 | 1 | 1 | 1 | 1 | 1 | 0 |
| NM_000512 | 1 | 0 | 1 | 1 | 0 | 0 |
| NM_000513 | 1 | 0 | 1 | 1 | 0 | 0 |
| NM_000514 | 0 | 0 | 1 | 0 | 0 | 0 |
| NM_000515 | 1 | 0 | 0 | 0 | 0 | 1 |
| NM_000516 | 1 | 1 | 1 | 0 | 0 | 0 |
| NM_000517 | 1 | 0 | 1 | 0 | 0 | 1 |
| NM_000519 | 1 | 0 | 1 | 0 | 0 | 0 |
| NM_000520 | 1 | 0 | 1 | 1 | 0 | 0 |
| NM_000521 | 1 | 1 | 1 | 1 | 0 | 1 |
| NM_000523 | 1 | 0 | 0 | 0 | 0 | 0 |
| NM_000525 | 1 | 0 | 0 | 0 | 0 | 0 |
| NM_000526 | 1 | 0 | 1 | 0 | 0 | 0 |
| NM_000527 | 1 | 1 | 1 | 1 | 0 | 0 |
| NM_000528 | 1 | 1 | 1 | 1 | 1 | 0 |
| NM_000532 | 1 | 1 | 1 | 0 | 0 | 1 |
| NM_000533 | 1 | 0 | 1 | 1 | 1 | 1 |
| NM_000534 | 1 | 0 | 1 | 0 | 0 | 0 |
| NM_000535 | 1 | 0 | 1 | 0 | 0 | 0 |
| NM_000536 | 0 | 0 | 1 | 0 | 0 | 0 |
| NM_000538 | 0 | 0 | 1 | 0 | 0 | 0 |
| NM_000539 | 1 | 1 | 0 | 0 | 0 | 0 |
| NM_000540 | 1 | 0 | 1 | 0 | 0 | 0 |
| NM_000541 | 1 | 0 | 1 | 0 | 0 | 0 |
| NM_000542 | 1 | 1 | 1 | 1 | 1 | 1 |
| NM_000543 | 1 | 0 | 1 | 0 | 0 | 0 |
| NM_000544 | 1 | 0 | 1 | 1 | 0 | 1 |
| NM_000545 | 1 | 0 | 0 | 0 | 0 | 1 |
| NM_000546 | 1 | 1 | 1 | 1 | 0 | 0 |
| NM_000547 | 1 | 0 | 1 | 0 | 0 | 0 |
| NM_000549 | 0 | 0 | 0 | 0 | 0 | 1 |

|           |   |   |   |   |   |   |
|-----------|---|---|---|---|---|---|
| NM_000551 | 1 | 0 | 1 | 0 | 0 | 0 |
| NM_000552 | 1 | 0 | 1 | 0 | 0 | 1 |
| NM_000553 | 1 | 0 | 1 | 1 | 0 | 0 |
| NM_000554 | 1 | 0 | 0 | 0 | 0 | 1 |
| NM_000557 | 1 | 0 | 1 | 0 | 0 | 0 |
| NM_000558 | 1 | 0 | 1 | 0 | 0 | 1 |
| NM_000559 | 1 | 0 | 1 | 0 | 0 | 1 |
| NM_000560 | 1 | 1 | 1 | 1 | 0 | 0 |
| NM_000561 | 1 | 0 | 1 | 0 | 0 | 1 |
| NM_000565 | 1 | 1 | 1 | 1 | 0 | 0 |
| NM_000566 | 1 | 0 | 1 | 0 | 0 | 0 |
| NM_000567 | 1 | 0 | 1 | 1 | 0 | 0 |
| NM_000569 | 1 | 1 | 1 | 1 | 0 | 0 |
| NM_000570 | 1 | 1 | 1 | 1 | 1 | 1 |
| NM_000572 | 1 | 1 | 1 | 1 | 0 | 0 |
| NM_000573 | 1 | 1 | 1 | 1 | 1 | 1 |
| NM_000574 | 1 | 1 | 1 | 1 | 0 | 1 |
| NM_000575 | 0 | 0 | 0 | 0 | 0 | 1 |
| NM_000576 | 1 | 0 | 1 | 1 | 0 | 0 |
| NM_000577 | 1 | 1 | 1 | 1 | 0 | 0 |
| NM_000578 | 1 | 1 | 1 | 1 | 0 | 0 |
| NM_000579 | 1 | 0 | 1 | 1 | 0 | 0 |
| NM_000581 | 1 | 1 | 1 | 1 | 1 | 1 |
| NM_000582 | 1 | 0 | 1 | 1 | 1 | 1 |
| NM_000583 | 0 | 0 | 1 | 0 | 0 | 0 |
| NM_000584 | 1 | 1 | 1 | 1 | 1 | 1 |
| NM_000585 | 1 | 0 | 1 | 0 | 0 | 1 |
| NM_000586 | 1 | 0 | 1 | 0 | 0 | 0 |
| NM_000587 | 0 | 0 | 0 | 0 | 0 | 1 |
| NM_000588 | 0 | 1 | 0 | 0 | 0 | 1 |
| NM_000589 | 1 | 1 | 1 | 0 | 0 | 0 |
| NM_000590 | 1 | 0 | 1 | 0 | 0 | 0 |
| NM_000591 | 1 | 1 | 1 | 1 | 1 | 1 |
| NM_000592 | 1 | 0 | 1 | 1 | 1 | 1 |
| NM_000593 | 1 | 0 | 1 | 0 | 1 | 1 |
| NM_000594 | 1 | 1 | 1 | 1 | 1 | 1 |
| NM_000595 | 0 | 0 | 0 | 0 | 0 | 1 |
| NM_000596 | 1 | 1 | 1 | 0 | 0 | 0 |
| NM_000597 | 1 | 0 | 1 | 1 | 1 | 0 |
| NM_000598 | 1 | 0 | 1 | 0 | 0 | 0 |
| NM_000599 | 1 | 0 | 1 | 0 | 0 | 1 |
| NM_000600 | 1 | 1 | 1 | 1 | 1 | 1 |
| NM_000601 | 1 | 0 | 1 | 0 | 0 | 1 |
| NM_000602 | 1 | 0 | 1 | 0 | 0 | 0 |
| NM_000603 | 1 | 0 | 1 | 1 | 0 | 1 |
| NM_000606 | 1 | 0 | 1 | 0 | 0 | 1 |
| NM_000607 | 1 | 1 | 1 | 1 | 0 | 1 |
| NM_000608 | 1 | 1 | 1 | 1 | 0 | 1 |
| NM_000609 | 1 | 0 | 1 | 0 | 0 | 0 |
| NM_000610 | 1 | 1 | 1 | 1 | 0 | 0 |
| NM_000611 | 1 | 1 | 1 | 1 | 1 | 1 |
| NM_000612 | 1 | 0 | 1 | 1 | 0 | 0 |

|           |   |   |   |   |   |   |
|-----------|---|---|---|---|---|---|
| NM_000613 | 1 | 0 | 1 | 0 | 0 | 1 |
| NM_000615 | 1 | 0 | 1 | 0 | 1 | 1 |
| NM_000616 | 1 | 1 | 1 | 0 | 0 | 0 |
| NM_000617 | 1 | 1 | 1 | 1 | 1 | 0 |
| NM_000618 | 1 | 0 | 1 | 0 | 1 | 1 |
| NM_000619 | 1 | 1 | 1 | 1 | 0 | 1 |
| NM_000620 | 1 | 0 | 1 | 0 | 0 | 0 |
| NM_000623 | 1 | 0 | 1 | 0 | 0 | 0 |
| NM_000624 | 1 | 0 | 0 | 0 | 0 | 0 |
| NM_000625 | 1 | 1 | 1 | 0 | 0 | 1 |
| NM_000627 | 1 | 1 | 1 | 1 | 0 | 1 |
| NM_000628 | 1 | 1 | 1 | 1 | 0 | 1 |
| NM_000629 | 1 | 0 | 1 | 1 | 1 | 1 |
| NM_000631 | 1 | 1 | 1 | 1 | 1 | 1 |
| NM_000632 | 1 | 0 | 1 | 0 | 1 | 1 |
| NM_000633 | 1 | 1 | 1 | 1 | 1 | 1 |
| NM_000634 | 1 | 1 | 1 | 1 | 0 | 0 |
| NM_000635 | 1 | 1 | 1 | 1 | 0 | 0 |
| NM_000636 | 1 | 1 | 1 | 1 | 1 | 1 |
| NM_000637 | 1 | 1 | 1 | 1 | 1 | 1 |
| NM_000638 | 0 | 0 | 0 | 0 | 0 | 1 |
| NM_000639 | 1 | 1 | 1 | 1 | 1 | 0 |
| NM_000640 | 0 | 0 | 0 | 0 | 0 | 1 |
| NM_000641 | 1 | 1 | 1 | 0 | 0 | 1 |
| NM_000642 | 1 | 0 | 1 | 1 | 1 | 0 |
| NM_000643 | 1 | 0 | 1 | 1 | 0 | 0 |
| NM_000646 | 1 | 0 | 1 | 1 | 1 | 0 |
| NM_000647 | 1 | 1 | 1 | 1 | 1 | 1 |
| NM_000648 | 1 | 1 | 1 | 1 | 1 | 1 |
| NM_000651 | 1 | 1 | 1 | 1 | 0 | 1 |
| NM_000655 | 1 | 1 | 1 | 1 | 0 | 0 |
| NM_000657 | 1 | 0 | 1 | 0 | 0 | 1 |
| NM_000658 | 1 | 0 | 1 | 0 | 0 | 1 |
| NM_000660 | 1 | 0 | 1 | 0 | 0 | 0 |
| NM_000662 | 1 | 0 | 1 | 0 | 0 | 1 |
| NM_000663 | 1 | 1 | 1 | 0 | 0 | 1 |
| NM_000664 | 0 | 0 | 1 | 0 | 0 | 0 |
| NM_000666 | 1 | 1 | 1 | 1 | 1 | 0 |
| NM_000669 | 0 | 0 | 1 | 0 | 0 | 0 |
| NM_000671 | 1 | 0 | 1 | 1 | 1 | 1 |
| NM_000672 | 0 | 0 | 0 | 0 | 0 | 1 |
| NM_000674 | 1 | 0 | 1 | 0 | 0 | 0 |
| NM_000675 | 1 | 1 | 1 | 1 | 0 | 1 |
| NM_000676 | 1 | 1 | 1 | 1 | 1 | 1 |
| NM_000677 | 1 | 1 | 1 | 1 | 0 | 0 |
| NM_000678 | 1 | 1 | 1 | 1 | 0 | 1 |
| NM_000679 | 1 | 0 | 1 | 0 | 0 | 0 |
| NM_000681 | 1 | 1 | 1 | 1 | 0 | 1 |
| NM_000682 | 1 | 1 | 1 | 1 | 0 | 0 |
| NM_000684 | 1 | 0 | 1 | 0 | 0 | 0 |
| NM_000685 | 1 | 0 | 0 | 0 | 0 | 0 |
| NM_000686 | 0 | 1 | 0 | 1 | 0 | 0 |

|           |   |   |   |   |   |   |
|-----------|---|---|---|---|---|---|
| NM_000687 | 1 | 1 | 1 | 0 | 0 | 1 |
| NM_000688 | 1 | 1 | 1 | 1 | 1 | 1 |
| NM_000689 | 1 | 0 | 1 | 0 | 0 | 1 |
| NM_000690 | 1 | 1 | 1 | 1 | 0 | 1 |
| NM_000691 | 0 | 1 | 0 | 0 | 0 | 0 |
| NM_000694 | 1 | 1 | 1 | 1 | 0 | 1 |
| NM_000695 | 0 | 0 | 1 | 0 | 0 | 0 |
| NM_000696 | 1 | 0 | 1 | 0 | 0 | 0 |
| NM_000697 | 1 | 0 | 1 | 0 | 0 | 1 |
| NM_000698 | 1 | 1 | 1 | 1 | 1 | 1 |
| NM_000699 | 1 | 0 | 1 | 0 | 0 | 0 |
| NM_000700 | 1 | 1 | 1 | 1 | 0 | 1 |
| NM_000701 | 1 | 1 | 1 | 1 | 0 | 0 |
| NM_000702 | 1 | 0 | 1 | 0 | 0 | 1 |
| NM_000703 | 1 | 0 | 1 | 0 | 0 | 0 |
| NM_000704 | 1 | 0 | 0 | 0 | 0 | 1 |
| NM_000706 | 1 | 1 | 1 | 0 | 0 | 1 |
| NM_000707 | 1 | 0 | 0 | 0 | 0 | 0 |
| NM_000709 | 1 | 1 | 1 | 1 | 0 | 0 |
| NM_000710 | 1 | 0 | 1 | 0 | 0 | 1 |
| NM_000711 | 1 | 0 | 1 | 0 | 1 | 1 |
| NM_000712 | 1 | 1 | 1 | 1 | 1 | 1 |
| NM_000713 | 1 | 1 | 1 | 1 | 1 | 0 |
| NM_000714 | 1 | 1 | 1 | 1 | 1 | 1 |
| NM_000715 | 1 | 1 | 1 | 1 | 0 | 1 |
| NM_000716 | 1 | 1 | 1 | 0 | 0 | 1 |
| NM_000717 | 1 | 1 | 1 | 1 | 0 | 1 |
| NM_000718 | 0 | 1 | 0 | 1 | 0 | 0 |
| NM_000720 | 1 | 0 | 1 | 0 | 0 | 0 |
| NM_000722 | 0 | 0 | 0 | 0 | 0 | 1 |
| NM_000723 | 1 | 0 | 1 | 0 | 0 | 0 |
| NM_000724 | 1 | 0 | 1 | 0 | 0 | 0 |
| NM_000725 | 1 | 0 | 1 | 0 | 1 | 0 |
| NM_000726 | 1 | 0 | 1 | 1 | 0 | 1 |
| NM_000727 | 1 | 0 | 0 | 0 | 0 | 0 |
| NM_000731 | 0 | 0 | 0 | 0 | 0 | 1 |
| NM_000732 | 1 | 1 | 1 | 1 | 0 | 1 |
| NM_000733 | 1 | 0 | 1 | 0 | 0 | 0 |
| NM_000734 | 1 | 0 | 1 | 1 | 1 | 1 |
| NM_000735 | 1 | 0 | 0 | 0 | 0 | 1 |
| NM_000737 | 1 | 0 | 1 | 1 | 0 | 0 |
| NM_000738 | 1 | 0 | 1 | 1 | 1 | 1 |
| NM_000739 | 1 | 0 | 1 | 0 | 0 | 0 |
| NM_000740 | 0 | 0 | 0 | 0 | 0 | 1 |
| NM_000741 | 1 | 1 | 1 | 1 | 0 | 1 |
| NM_000742 | 1 | 1 | 1 | 0 | 0 | 0 |
| NM_000743 | 0 | 0 | 0 | 0 | 1 | 0 |
| NM_000744 | 0 | 0 | 0 | 0 | 0 | 1 |
| NM_000746 | 1 | 0 | 1 | 0 | 1 | 1 |
| NM_000747 | 1 | 0 | 1 | 1 | 0 | 0 |
| NM_000748 | 1 | 0 | 1 | 1 | 0 | 0 |
| NM_000750 | 1 | 1 | 1 | 0 | 0 | 0 |



|           |   |   |   |   |   |   |
|-----------|---|---|---|---|---|---|
| NM_000751 | 1 | 0 | 1 | 0 | 0 | 0 |
| NM_000752 | 1 | 0 | 1 | 1 | 0 | 1 |
| NM_000753 | 1 | 1 | 1 | 1 | 1 | 1 |
| NM_000754 | 1 | 1 | 1 | 1 | 1 | 1 |
| NM_000755 | 1 | 0 | 1 | 0 | 0 | 0 |
| NM_000758 | 1 | 1 | 1 | 1 | 0 | 1 |
| NM_000759 | 1 | 0 | 1 | 1 | 0 | 0 |
| NM_000760 | 1 | 1 | 1 | 1 | 0 | 0 |
| NM_000762 | 1 | 0 | 1 | 0 | 0 | 0 |
| NM_000764 | 1 | 0 | 1 | 1 | 0 | 0 |
| NM_000765 | 1 | 0 | 1 | 0 | 0 | 0 |
| NM_000766 | 1 | 1 | 1 | 0 | 0 | 1 |
| NM_000767 | 1 | 0 | 1 | 0 | 0 | 1 |
| NM_000769 | 0 | 0 | 0 | 0 | 0 | 1 |
| NM_000770 | 1 | 0 | 1 | 0 | 0 | 0 |
| NM_000771 | 1 | 0 | 1 | 1 | 0 | 0 |
| NM_000772 | 1 | 0 | 1 | 0 | 0 | 0 |
| NM_000773 | 1 | 1 | 1 | 0 | 0 | 0 |
| NM_000774 | 1 | 0 | 1 | 0 | 0 | 1 |
| NM_000775 | 1 | 1 | 1 | 1 | 0 | 0 |
| NM_000777 | 1 | 0 | 0 | 1 | 0 | 0 |
| NM_000778 | 1 | 0 | 1 | 1 | 1 | 0 |
| NM_000779 | 1 | 0 | 1 | 0 | 0 | 0 |
| NM_000780 | 0 | 0 | 0 | 0 | 0 | 1 |
| NM_000781 | 1 | 0 | 0 | 0 | 0 | 0 |
| NM_000782 | 1 | 0 | 1 | 0 | 0 | 1 |
| NM_000783 | 0 | 0 | 1 | 0 | 0 | 0 |
| NM_000784 | 1 | 1 | 1 | 1 | 0 | 1 |
| NM_000785 | 1 | 0 | 0 | 0 | 0 | 1 |
| NM_000786 | 1 | 1 | 1 | 1 | 1 | 1 |
| NM_000788 | 1 | 0 | 1 | 0 | 0 | 1 |
| NM_000789 | 1 | 0 | 1 | 0 | 0 | 0 |
| NM_000792 | 0 | 0 | 1 | 0 | 0 | 0 |
| NM_000793 | 0 | 0 | 0 | 0 | 0 | 1 |
| NM_000795 | 1 | 1 | 1 | 0 | 0 | 0 |
| NM_000797 | 1 | 0 | 1 | 1 | 1 | 0 |
| NM_000798 | 1 | 1 | 1 | 0 | 0 | 0 |
| NM_000799 | 1 | 0 | 0 | 0 | 0 | 0 |
| NM_000800 | 1 | 0 | 0 | 0 | 0 | 0 |
| NM_000801 | 1 | 0 | 1 | 1 | 1 | 1 |
| NM_000802 | 1 | 1 | 0 | 0 | 0 | 1 |
| NM_000803 | 1 | 1 | 1 | 1 | 0 | 0 |
| NM_000804 | 1 | 1 | 1 | 1 | 0 | 0 |
| NM_000805 | 1 | 0 | 1 | 0 | 0 | 1 |
| NM_000806 | 1 | 0 | 1 | 0 | 0 | 1 |
| NM_000807 | 0 | 0 | 0 | 0 | 0 | 1 |
| NM_000809 | 0 | 0 | 0 | 0 | 0 | 1 |
| NM_000812 | 1 | 0 | 1 | 0 | 0 | 0 |
| NM_000814 | 1 | 0 | 0 | 0 | 0 | 0 |
| NM_000815 | 1 | 1 | 1 | 1 | 0 | 0 |
| NM_000816 | 0 | 0 | 0 | 0 | 0 | 1 |
| NM_000819 | 1 | 0 | 1 | 1 | 0 | 0 |

|           |   |   |   |   |   |   |
|-----------|---|---|---|---|---|---|
| NM_000820 | 1 | 1 | 1 | 1 | 0 | 1 |
| NM_000821 | 1 | 0 | 1 | 0 | 0 | 0 |
| NM_000823 | 1 | 1 | 1 | 0 | 0 | 0 |
| NM_000825 | 1 | 0 | 1 | 0 | 0 | 0 |
| NM_000826 | 0 | 0 | 0 | 0 | 0 | 1 |
| NM_000828 | 1 | 0 | 0 | 0 | 0 | 1 |
| NM_000829 | 1 | 0 | 0 | 0 | 0 | 0 |
| NM_000830 | 1 | 0 | 1 | 1 | 0 | 0 |
| NM_000831 | 1 | 0 | 1 | 0 | 0 | 0 |
| NM_000833 | 1 | 0 | 1 | 0 | 0 | 1 |
| NM_000835 | 1 | 0 | 1 | 0 | 0 | 1 |
| NM_000836 | 1 | 0 | 1 | 1 | 0 | 0 |
| NM_000839 | 1 | 1 | 1 | 1 | 0 | 1 |
| NM_000840 | 0 | 0 | 0 | 1 | 0 | 0 |
| NM_000841 | 1 | 0 | 1 | 0 | 0 | 0 |
| NM_000842 | 0 | 0 | 1 | 1 | 0 | 0 |
| NM_000843 | 1 | 1 | 0 | 0 | 0 | 1 |
| NM_000845 | 1 | 1 | 1 | 0 | 0 | 0 |
| NM_000846 | 1 | 0 | 1 | 0 | 0 | 0 |
| NM_000848 | 1 | 0 | 1 | 1 | 1 | 0 |
| NM_000849 | 1 | 0 | 1 | 0 | 0 | 0 |
| NM_000850 | 1 | 1 | 1 | 1 | 0 | 0 |
| NM_000851 | 1 | 0 | 0 | 0 | 0 | 1 |
| NM_000852 | 1 | 0 | 1 | 0 | 0 | 0 |
| NM_000853 | 1 | 0 | 1 | 0 | 1 | 0 |
| NM_000854 | 1 | 1 | 1 | 1 | 0 | 1 |
| NM_000855 | 1 | 1 | 1 | 1 | 0 | 0 |
| NM_000856 | 1 | 0 | 1 | 0 | 0 | 1 |
| NM_000857 | 1 | 1 | 1 | 1 | 0 | 1 |
| NM_000858 | 1 | 0 | 1 | 0 | 0 | 0 |
| NM_000859 | 1 | 1 | 1 | 1 | 0 | 0 |
| NM_000860 | 1 | 1 | 1 | 1 | 1 | 1 |
| NM_000861 | 0 | 0 | 1 | 0 | 0 | 0 |
| NM_000862 | 1 | 0 | 1 | 0 | 0 | 1 |
| NM_000863 | 1 | 0 | 1 | 0 | 0 | 0 |
| NM_000864 | 0 | 1 | 0 | 1 | 0 | 0 |
| NM_000865 | 1 | 1 | 1 | 1 | 0 | 0 |
| NM_000867 | 1 | 0 | 1 | 0 | 0 | 0 |
| NM_000868 | 0 | 0 | 0 | 0 | 0 | 1 |
| NM_000869 | 1 | 0 | 1 | 0 | 0 | 0 |
| NM_000870 | 1 | 0 | 1 | 0 | 0 | 0 |
| NM_000871 | 1 | 1 | 1 | 1 | 0 | 0 |
| NM_000872 | 1 | 1 | 1 | 1 | 0 | 0 |
| NM_000873 | 1 | 0 | 1 | 0 | 0 | 1 |
| NM_000874 | 1 | 1 | 1 | 1 | 0 | 0 |
| NM_000875 | 1 | 0 | 1 | 1 | 0 | 0 |
| NM_000876 | 1 | 1 | 1 | 1 | 0 | 1 |
| NM_000877 | 1 | 1 | 1 | 1 | 0 | 1 |
| NM_000878 | 1 | 1 | 1 | 1 | 1 | 0 |
| NM_000880 | 1 | 0 | 1 | 0 | 1 | 0 |
| NM_000882 | 1 | 1 | 1 | 1 | 0 | 0 |
| NM_000883 | 1 | 0 | 1 | 1 | 1 | 1 |

|           |   |   |   |   |   |   |
|-----------|---|---|---|---|---|---|
| NM_000884 | 1 | 1 | 1 | 1 | 1 | 1 |
| NM_000885 | 1 | 0 | 1 | 0 | 0 | 1 |
| NM_000887 | 1 | 0 | 1 | 1 | 1 | 1 |
| NM_000889 | 1 | 1 | 1 | 1 | 0 | 0 |
| NM_000890 | 1 | 0 | 1 | 0 | 0 | 0 |
| NM_000891 | 1 | 0 | 1 | 1 | 0 | 0 |
| NM_000892 | 1 | 0 | 1 | 0 | 0 | 0 |
| NM_000894 | 1 | 1 | 1 | 1 | 0 | 0 |
| NM_000895 | 1 | 1 | 1 | 1 | 0 | 1 |
| NM_000897 | 1 | 1 | 1 | 1 | 0 | 0 |
| NM_000898 | 1 | 0 | 1 | 0 | 0 | 1 |
| NM_000900 | 1 | 1 | 1 | 1 | 0 | 0 |
| NM_000901 | 1 | 1 | 1 | 1 | 1 | 1 |
| NM_000902 | 1 | 1 | 1 | 1 | 1 | 1 |
| NM_000903 | 1 | 0 | 1 | 1 | 0 | 0 |
| NM_000904 | 1 | 1 | 1 | 1 | 0 | 1 |
| NM_000905 | 1 | 1 | 1 | 1 | 0 | 0 |
| NM_000906 | 1 | 0 | 1 | 0 | 0 | 1 |
| NM_000907 | 1 | 0 | 1 | 1 | 0 | 0 |
| NM_000908 | 1 | 0 | 1 | 0 | 0 | 1 |
| NM_000911 | 0 | 0 | 1 | 0 | 0 | 0 |
| NM_000912 | 0 | 0 | 0 | 1 | 0 | 0 |
| NM_000913 | 1 | 0 | 1 | 0 | 0 | 0 |
| NM_000914 | 1 | 0 | 0 | 0 | 0 | 0 |
| NM_000915 | 1 | 0 | 1 | 0 | 0 | 0 |
| NM_000917 | 1 | 1 | 1 | 1 | 0 | 1 |
| NM_000918 | 1 | 1 | 1 | 1 | 0 | 0 |
| NM_000920 | 1 | 0 | 1 | 1 | 0 | 0 |
| NM_000921 | 1 | 0 | 1 | 1 | 0 | 0 |
| NM_000922 | 1 | 1 | 1 | 1 | 0 | 1 |
| NM_000923 | 0 | 0 | 0 | 0 | 0 | 1 |
| NM_000924 | 1 | 0 | 1 | 0 | 0 | 0 |
| NM_000925 | 1 | 0 | 1 | 1 | 0 | 0 |
| NM_000926 | 1 | 0 | 1 | 0 | 0 | 0 |
| NM_000927 | 1 | 1 | 1 | 1 | 1 | 1 |
| NM_000928 | 1 | 0 | 1 | 0 | 0 | 0 |
| NM_000929 | 0 | 0 | 1 | 0 | 0 | 0 |
| NM_000930 | 1 | 0 | 1 | 0 | 0 | 1 |
| NM_000932 | 0 | 1 | 0 | 1 | 0 | 0 |
| NM_000933 | 1 | 0 | 0 | 0 | 0 | 1 |
| NM_000934 | 1 | 1 | 1 | 1 | 0 | 0 |
| NM_000935 | 1 | 1 | 1 | 0 | 0 | 0 |
| NM_000936 | 1 | 0 | 0 | 0 | 0 | 0 |
| NM_000937 | 1 | 1 | 1 | 1 | 0 | 1 |
| NM_000938 | 1 | 0 | 1 | 1 | 1 | 1 |
| NM_000939 | 1 | 0 | 1 | 1 | 0 | 1 |
| NM_000941 | 1 | 1 | 1 | 1 | 0 | 0 |
| NM_000942 | 1 | 1 | 1 | 0 | 0 | 1 |
| NM_000943 | 1 | 1 | 0 | 0 | 0 | 0 |
| NM_000944 | 1 | 1 | 1 | 1 | 1 | 1 |
| NM_000945 | 1 | 0 | 1 | 0 | 0 | 1 |
| NM_000946 | 1 | 0 | 1 | 1 | 0 | 0 |

|           |   |   |   |   |   |   |
|-----------|---|---|---|---|---|---|
| NM_000947 | 1 | 0 | 1 | 0 | 0 | 0 |
| NM_000948 | 1 | 1 | 1 | 1 | 0 | 0 |
| NM_000949 | 0 | 0 | 1 | 0 | 0 | 0 |
| NM_000950 | 1 | 0 | 1 | 0 | 1 | 0 |
| NM_000951 | 1 | 0 | 1 | 0 | 0 | 0 |
| NM_000952 | 1 | 1 | 1 | 1 | 0 | 1 |
| NM_000953 | 1 | 1 | 1 | 1 | 1 | 1 |
| NM_000954 | 1 | 0 | 1 | 0 | 0 | 1 |
| NM_000955 | 0 | 0 | 0 | 1 | 0 | 0 |
| NM_000956 | 1 | 1 | 1 | 1 | 0 | 0 |
| NM_000957 | 1 | 0 | 1 | 0 | 0 | 0 |
| NM_000958 | 1 | 0 | 1 | 0 | 1 | 0 |
| NM_000959 | 1 | 1 | 1 | 1 | 0 | 0 |
| NM_000960 | 1 | 1 | 1 | 1 | 1 | 1 |
| NM_000961 | 1 | 0 | 1 | 0 | 0 | 0 |
| NM_000962 | 1 | 0 | 1 | 0 | 0 | 0 |
| NM_000963 | 1 | 1 | 1 | 1 | 1 | 1 |
| NM_000964 | 1 | 0 | 1 | 1 | 1 | 1 |
| NM_000965 | 0 | 0 | 1 | 0 | 0 | 0 |
| NM_000966 | 1 | 1 | 0 | 0 | 0 | 0 |
| NM_000967 | 1 | 1 | 1 | 1 | 0 | 0 |
| NM_000969 | 1 | 0 | 1 | 1 | 1 | 1 |
| NM_000970 | 1 | 0 | 1 | 1 | 1 | 1 |
| NM_000971 | 1 | 1 | 0 | 0 | 0 | 0 |
| NM_000973 | 1 | 1 | 0 | 0 | 0 | 0 |
| NM_000975 | 1 | 0 | 1 | 1 | 1 | 1 |
| NM_000976 | 1 | 0 | 1 | 1 | 1 | 1 |
| NM_000977 | 1 | 1 | 1 | 1 | 1 | 1 |
| NM_000978 | 0 | 1 | 0 | 0 | 0 | 0 |
| NM_000979 | 1 | 0 | 1 | 1 | 1 | 1 |
| NM_000980 | 1 | 0 | 1 | 1 | 0 | 0 |
| NM_000982 | 1 | 0 | 1 | 1 | 0 | 0 |
| NM_000983 | 1 | 1 | 1 | 1 | 1 | 1 |
| NM_000985 | 1 | 0 | 1 | 1 | 1 | 1 |
| NM_000986 | 1 | 0 | 1 | 1 | 1 | 1 |
| NM_000989 | 0 | 0 | 1 | 0 | 0 | 0 |
| NM_000990 | 1 | 0 | 1 | 0 | 0 | 0 |
| NM_000991 | 1 | 1 | 1 | 1 | 0 | 1 |
| NM_000992 | 1 | 0 | 1 | 0 | 1 | 1 |
| NM_000994 | 0 | 0 | 1 | 0 | 0 | 0 |
| NM_000995 | 1 | 1 | 1 | 1 | 1 | 1 |
| NM_000996 | 1 | 1 | 1 | 1 | 1 | 1 |
| NM_000998 | 1 | 0 | 1 | 1 | 0 | 0 |
| NM_000999 | 0 | 0 | 0 | 1 | 0 | 0 |
| NM_001000 | 1 | 0 | 1 | 1 | 1 | 0 |
| NM_001001 | 1 | 0 | 1 | 0 | 0 | 0 |
| NM_001003 | 1 | 0 | 1 | 1 | 0 | 1 |
| NM_001004 | 1 | 1 | 0 | 0 | 0 | 0 |
| NM_001006 | 1 | 0 | 1 | 1 | 1 | 1 |
| NM_001007 | 1 | 0 | 1 | 1 | 0 | 0 |
| NM_001008 | 1 | 0 | 1 | 1 | 1 | 1 |
| NM_001009 | 1 | 0 | 1 | 1 | 0 | 0 |

|           |   |   |   |   |   |   |
|-----------|---|---|---|---|---|---|
| NM_001011 | 1 | 0 | 1 | 0 | 0 | 1 |
| NM_001012 | 1 | 0 | 1 | 0 | 1 | 1 |
| NM_001013 | 1 | 1 | 1 | 1 | 1 | 1 |
| NM_001015 | 1 | 0 | 1 | 0 | 1 | 1 |
| NM_001017 | 1 | 0 | 1 | 1 | 1 | 1 |
| NM_001018 | 1 | 0 | 1 | 1 | 0 | 0 |
| NM_001019 | 1 | 0 | 1 | 1 | 0 | 0 |
| NM_001020 | 1 | 0 | 1 | 1 | 1 | 1 |
| NM_001021 | 0 | 0 | 1 | 0 | 0 | 1 |
| NM_001023 | 1 | 0 | 1 | 0 | 0 | 0 |
| NM_001024 | 1 | 0 | 1 | 1 | 1 | 1 |
| NM_001026 | 1 | 1 | 1 | 1 | 1 | 1 |
| NM_001028 | 1 | 0 | 1 | 0 | 0 | 0 |
| NM_001029 | 1 | 0 | 1 | 0 | 0 | 0 |
| NM_001031 | 1 | 0 | 1 | 1 | 1 | 1 |
| NM_001033 | 1 | 0 | 1 | 0 | 0 | 0 |
| NM_001034 | 1 | 0 | 1 | 0 | 0 | 1 |
| NM_001035 | 1 | 0 | 1 | 0 | 0 | 0 |
| NM_001036 | 1 | 1 | 1 | 1 | 0 | 0 |
| NM_001037 | 1 | 1 | 1 | 0 | 0 | 1 |
| NM_001038 | 1 | 1 | 1 | 1 | 0 | 0 |
| NM_001039 | 1 | 0 | 0 | 0 | 0 | 0 |
| NM_001040 | 1 | 0 | 0 | 0 | 0 | 1 |
| NM_001042 | 1 | 0 | 1 | 0 | 1 | 0 |
| NM_001043 | 1 | 0 | 1 | 0 | 0 | 0 |
| NM_001044 | 0 | 0 | 1 | 0 | 0 | 0 |
| NM_001045 | 1 | 0 | 1 | 0 | 0 | 1 |
| NM_001046 | 1 | 0 | 1 | 1 | 0 | 1 |
| NM_001047 | 1 | 1 | 1 | 1 | 0 | 0 |
| NM_001048 | 1 | 1 | 1 | 1 | 1 | 0 |
| NM_001049 | 1 | 1 | 1 | 1 | 1 | 0 |
| NM_001050 | 1 | 1 | 1 | 1 | 0 | 1 |
| NM_001051 | 1 | 0 | 1 | 1 | 0 | 0 |
| NM_001052 | 1 | 0 | 1 | 1 | 1 | 1 |
| NM_001053 | 1 | 0 | 1 | 1 | 1 | 1 |
| NM_001054 | 1 | 1 | 1 | 1 | 1 | 1 |
| NM_001055 | 1 | 1 | 1 | 1 | 1 | 1 |
| NM_001057 | 1 | 0 | 1 | 0 | 1 | 1 |
| NM_001058 | 1 | 1 | 1 | 1 | 0 | 0 |
| NM_001059 | 1 | 0 | 1 | 0 | 0 | 0 |
| NM_001060 | 1 | 1 | 1 | 0 | 0 | 1 |
| NM_001061 | 1 | 1 | 1 | 1 | 0 | 1 |
| NM_001062 | 1 | 0 | 1 | 0 | 0 | 1 |
| NM_001063 | 1 | 0 | 1 | 0 | 0 | 0 |
| NM_001065 | 1 | 0 | 1 | 1 | 1 | 1 |
| NM_001066 | 1 | 1 | 1 | 1 | 0 | 0 |
| NM_001067 | 1 | 1 | 1 | 0 | 0 | 1 |
| NM_001068 | 1 | 0 | 1 | 1 | 0 | 0 |
| NM_001069 | 1 | 0 | 1 | 0 | 0 | 0 |
| NM_001070 | 1 | 1 | 1 | 1 | 0 | 0 |
| NM_001071 | 1 | 1 | 1 | 0 | 1 | 1 |
| NM_001072 | 1 | 0 | 0 | 0 | 0 | 1 |

|           |   |   |   |   |   |   |
|-----------|---|---|---|---|---|---|
| NM_001073 | 1 | 1 | 1 | 1 | 1 | 0 |
| NM_001074 | 0 | 0 | 0 | 0 | 0 | 1 |
| NM_001075 | 1 | 0 | 1 | 1 | 0 | 0 |
| NM_001076 | 0 | 0 | 0 | 1 | 0 | 0 |
| NM_001077 | 1 | 0 | 1 | 0 | 0 | 0 |
| NM_001078 | 1 | 1 | 1 | 1 | 1 | 1 |
| NM_001079 | 1 | 1 | 1 | 1 | 1 | 1 |
| NM_001080 | 1 | 1 | 1 | 1 | 0 | 0 |
| NM_001081 | 1 | 0 | 1 | 0 | 0 | 1 |
| NM_001082 | 1 | 1 | 1 | 1 | 1 | 1 |
| NM_001084 | 1 | 1 | 1 | 1 | 0 | 0 |
| NM_001087 | 1 | 1 | 1 | 1 | 0 | 0 |
| NM_001088 | 1 | 0 | 1 | 0 | 0 | 0 |
| NM_001089 | 1 | 0 | 1 | 1 | 1 | 1 |
| NM_001090 | 1 | 1 | 1 | 1 | 0 | 1 |
| NM_001091 | 1 | 0 | 1 | 0 | 0 | 1 |
| NM_001092 | 1 | 0 | 1 | 1 | 0 | 0 |
| NM_001093 | 0 | 0 | 1 | 0 | 0 | 0 |
| NM_001094 | 1 | 0 | 1 | 0 | 0 | 0 |
| NM_001095 | 1 | 0 | 1 | 0 | 0 | 1 |
| NM_001096 | 1 | 1 | 1 | 1 | 1 | 0 |
| NM_001097 | 1 | 0 | 1 | 0 | 0 | 0 |
| NM_001098 | 1 | 1 | 1 | 1 | 0 | 0 |
| NM_001099 | 1 | 1 | 1 | 1 | 0 | 1 |
| NM_001100 | 1 | 1 | 1 | 1 | 0 | 1 |
| NM_001101 | 1 | 0 | 1 | 1 | 0 | 0 |
| NM_001102 | 1 | 0 | 1 | 1 | 0 | 0 |
| NM_001103 | 1 | 0 | 0 | 0 | 0 | 0 |
| NM_001104 | 1 | 0 | 1 | 1 | 0 | 0 |
| NM_001105 | 1 | 0 | 1 | 0 | 0 | 0 |
| NM_001106 | 1 | 1 | 1 | 1 | 0 | 0 |
| NM_001107 | 1 | 0 | 1 | 1 | 1 | 1 |
| NM_001109 | 1 | 1 | 1 | 1 | 0 | 1 |
| NM_001110 | 1 | 0 | 1 | 0 | 0 | 0 |
| NM_001112 | 0 | 0 | 1 | 0 | 0 | 0 |
| NM_001114 | 1 | 0 | 1 | 0 | 0 | 0 |
| NM_001115 | 1 | 0 | 0 | 0 | 0 | 0 |
| NM_001116 | 1 | 1 | 1 | 1 | 0 | 0 |
| NM_001117 | 0 | 0 | 0 | 1 | 0 | 0 |
| NM_001118 | 0 | 0 | 1 | 0 | 0 | 0 |
| NM_001120 | 1 | 0 | 1 | 0 | 0 | 1 |
| NM_001122 | 1 | 0 | 1 | 1 | 1 | 1 |
| NM_001123 | 1 | 1 | 1 | 1 | 0 | 0 |
| NM_001124 | 1 | 1 | 1 | 1 | 1 | 1 |
| NM_001125 | 1 | 1 | 1 | 1 | 0 | 0 |
| NM_001126 | 1 | 0 | 1 | 0 | 1 | 0 |
| NM_001127 | 1 | 1 | 1 | 1 | 0 | 0 |
| NM_001128 | 1 | 1 | 1 | 1 | 0 | 0 |
| NM_001129 | 1 | 1 | 1 | 1 | 0 | 1 |
| NM_001130 | 1 | 0 | 1 | 0 | 0 | 0 |
| NM_001132 | 1 | 0 | 1 | 0 | 1 | 1 |
| NM_001134 | 0 | 0 | 0 | 0 | 0 | 1 |

|           |   |   |   |   |   |   |
|-----------|---|---|---|---|---|---|
| NM_001135 | 1 | 0 | 1 | 0 | 0 | 0 |
| NM_001136 | 1 | 0 | 1 | 0 | 0 | 0 |
| NM_001138 | 0 | 1 | 1 | 1 | 1 | 0 |
| NM_001139 | 1 | 1 | 1 | 1 | 0 | 0 |
| NM_001140 | 1 | 1 | 1 | 1 | 0 | 0 |
| NM_001141 | 1 | 0 | 0 | 1 | 0 | 0 |
| NM_001144 | 1 | 0 | 1 | 0 | 1 | 1 |
| NM_001145 | 1 | 1 | 1 | 1 | 0 | 0 |
| NM_001146 | 1 | 1 | 1 | 1 | 0 | 1 |
| NM_001147 | 1 | 1 | 1 | 1 | 0 | 0 |
| NM_001148 | 1 | 0 | 0 | 0 | 0 | 0 |
| NM_001150 | 1 | 0 | 1 | 1 | 1 | 1 |
| NM_001151 | 1 | 0 | 1 | 1 | 0 | 0 |
| NM_001152 | 1 | 1 | 1 | 1 | 0 | 1 |
| NM_001153 | 1 | 1 | 1 | 1 | 0 | 0 |
| NM_001154 | 1 | 1 | 1 | 1 | 1 | 1 |
| NM_001155 | 1 | 1 | 1 | 1 | 0 | 1 |
| NM_001157 | 1 | 0 | 1 | 0 | 0 | 0 |
| NM_001158 | 1 | 1 | 1 | 1 | 0 | 1 |
| NM_001159 | 0 | 0 | 0 | 1 | 0 | 0 |
| NM_001160 | 1 | 1 | 1 | 1 | 0 | 0 |
| NM_001163 | 1 | 0 | 1 | 1 | 0 | 0 |
| NM_001164 | 1 | 1 | 1 | 1 | 0 | 1 |
| NM_001165 | 1 | 1 | 1 | 1 | 1 | 1 |
| NM_001166 | 1 | 1 | 1 | 1 | 0 | 1 |
| NM_001167 | 1 | 0 | 1 | 1 | 1 | 0 |
| NM_001168 | 1 | 0 | 1 | 0 | 1 | 1 |
| NM_001169 | 1 | 0 | 1 | 0 | 0 | 0 |
| NM_001170 | 1 | 0 | 0 | 0 | 0 | 0 |
| NM_001171 | 1 | 1 | 1 | 1 | 0 | 0 |
| NM_001172 | 1 | 0 | 1 | 0 | 0 | 1 |
| NM_001173 | 1 | 0 | 1 | 0 | 0 | 0 |
| NM_001174 | 1 | 0 | 1 | 1 | 0 | 1 |
| NM_001175 | 0 | 0 | 0 | 0 | 1 | 0 |
| NM_001176 | 1 | 1 | 1 | 1 | 0 | 0 |
| NM_001177 | 1 | 1 | 1 | 1 | 0 | 0 |
| NM_001178 | 1 | 1 | 1 | 1 | 0 | 0 |
| NM_001179 | 0 | 0 | 0 | 0 | 0 | 1 |
| NM_001181 | 1 | 1 | 1 | 1 | 0 | 1 |
| NM_001182 | 1 | 0 | 1 | 0 | 0 | 1 |
| NM_001183 | 1 | 0 | 1 | 1 | 0 | 0 |
| NM_001184 | 1 | 0 | 1 | 0 | 1 | 0 |
| NM_001185 | 1 | 0 | 1 | 0 | 0 | 0 |
| NM_001186 | 1 | 1 | 1 | 1 | 1 | 1 |
| NM_001187 | 0 | 1 | 0 | 1 | 0 | 0 |
| NM_001188 | 1 | 0 | 1 | 0 | 1 | 1 |
| NM_001190 | 1 | 1 | 1 | 1 | 0 | 1 |
| NM_001191 | 1 | 0 | 1 | 0 | 0 | 0 |
| NM_001192 | 1 | 0 | 1 | 0 | 1 | 1 |
| NM_001194 | 1 | 0 | 1 | 0 | 0 | 0 |
| NM_001195 | 1 | 0 | 1 | 1 | 1 | 1 |
| NM_001196 | 1 | 1 | 1 | 1 | 1 | 1 |

|           |   |   |   |   |   |   |
|-----------|---|---|---|---|---|---|
| NM_001197 | 1 | 1 | 1 | 0 | 0 | 0 |
| NM_001198 | 1 | 1 | 1 | 1 | 0 | 0 |
| NM_001199 | 1 | 0 | 1 | 0 | 0 | 1 |
| NM_001200 | 1 | 0 | 1 | 0 | 0 | 1 |
| NM_001203 | 1 | 0 | 0 | 0 | 0 | 0 |
| NM_001204 | 1 | 0 | 1 | 0 | 0 | 0 |
| NM_001205 | 1 | 0 | 1 | 0 | 0 | 0 |
| NM_001206 | 1 | 1 | 1 | 1 | 1 | 0 |
| NM_001207 | 1 | 1 | 1 | 1 | 1 | 1 |
| NM_001208 | 1 | 1 | 1 | 1 | 0 | 0 |
| NM_001211 | 1 | 0 | 1 | 0 | 0 | 1 |
| NM_001212 | 1 | 1 | 1 | 1 | 0 | 1 |
| NM_001214 | 1 | 0 | 1 | 0 | 0 | 0 |
| NM_001215 | 1 | 1 | 1 | 1 | 0 | 1 |
| NM_001216 | 1 | 0 | 1 | 0 | 0 | 0 |
| NM_001217 | 1 | 1 | 1 | 1 | 1 | 0 |
| NM_001218 | 1 | 1 | 1 | 0 | 0 | 1 |
| NM_001219 | 1 | 1 | 1 | 1 | 0 | 0 |
| NM_001220 | 1 | 0 | 1 | 0 | 0 | 0 |
| NM_001221 | 1 | 1 | 1 | 1 | 0 | 0 |
| NM_001222 | 1 | 0 | 1 | 0 | 1 | 1 |
| NM_001224 | 1 | 0 | 1 | 0 | 0 | 0 |
| NM_001225 | 1 | 1 | 1 | 1 | 1 | 1 |
| NM_001226 | 1 | 1 | 1 | 1 | 0 | 0 |
| NM_001227 | 1 | 0 | 1 | 0 | 0 | 1 |
| NM_001230 | 1 | 1 | 1 | 1 | 0 | 1 |
| NM_001231 | 1 | 1 | 1 | 0 | 1 | 1 |
| NM_001232 | 1 | 0 | 1 | 0 | 0 | 0 |
| NM_001233 | 1 | 0 | 1 | 0 | 1 | 1 |
| NM_001235 | 1 | 0 | 1 | 1 | 1 | 0 |
| NM_001236 | 1 | 1 | 1 | 1 | 0 | 1 |
| NM_001237 | 1 | 0 | 1 | 0 | 1 | 1 |
| NM_001238 | 1 | 1 | 1 | 1 | 1 | 1 |
| NM_001239 | 1 | 0 | 1 | 0 | 0 | 0 |
| NM_001240 | 1 | 0 | 1 | 0 | 0 | 0 |
| NM_001242 | 1 | 0 | 1 | 1 | 0 | 1 |
| NM_001244 | 1 | 1 | 1 | 1 | 0 | 0 |
| NM_001245 | 1 | 0 | 1 | 0 | 0 | 0 |
| NM_001246 | 1 | 0 | 1 | 0 | 1 | 0 |
| NM_001247 | 1 | 1 | 1 | 1 | 0 | 1 |
| NM_001248 | 1 | 0 | 1 | 0 | 1 | 0 |
| NM_001249 | 1 | 0 | 1 | 0 | 0 | 0 |
| NM_001251 | 1 | 1 | 1 | 1 | 1 | 1 |
| NM_001252 | 1 | 0 | 1 | 0 | 0 | 0 |
| NM_001253 | 1 | 0 | 1 | 0 | 0 | 1 |
| NM_001254 | 1 | 0 | 1 | 0 | 0 | 0 |
| NM_001255 | 1 | 0 | 1 | 0 | 1 | 1 |
| NM_001256 | 1 | 1 | 1 | 1 | 0 | 0 |
| NM_001257 | 0 | 0 | 1 | 0 | 0 | 1 |
| NM_001258 | 1 | 1 | 1 | 1 | 0 | 0 |
| NM_001259 | 1 | 1 | 1 | 1 | 0 | 1 |
| NM_001260 | 1 | 0 | 1 | 1 | 0 | 1 |



|           |   |   |   |   |   |   |
|-----------|---|---|---|---|---|---|
| NM_001261 | 1 | 0 | 1 | 0 | 0 | 0 |
| NM_001262 | 1 | 1 | 1 | 0 | 0 | 1 |
| NM_001263 | 1 | 1 | 1 | 1 | 0 | 1 |
| NM_001264 | 1 | 1 | 1 | 1 | 0 | 0 |
| NM_001266 | 1 | 1 | 1 | 1 | 1 | 1 |
| NM_001267 | 1 | 0 | 1 | 0 | 0 | 1 |
| NM_001268 | 1 | 1 | 1 | 1 | 1 | 1 |
| NM_001269 | 1 | 0 | 1 | 0 | 1 | 1 |
| NM_001270 | 1 | 0 | 1 | 0 | 0 | 0 |
| NM_001273 | 1 | 0 | 1 | 0 | 0 | 0 |
| NM_001274 | 1 | 0 | 1 | 0 | 1 | 1 |
| NM_001275 | 1 | 1 | 1 | 1 | 0 | 0 |
| NM_001276 | 1 | 1 | 1 | 1 | 1 | 1 |
| NM_001277 | 1 | 1 | 1 | 1 | 0 | 1 |
| NM_001278 | 1 | 0 | 1 | 0 | 0 | 0 |
| NM_001279 | 1 | 0 | 0 | 0 | 0 | 0 |
| NM_001280 | 1 | 1 | 1 | 1 | 1 | 1 |
| NM_001281 | 1 | 0 | 1 | 0 | 0 | 1 |
| NM_001282 | 1 | 0 | 1 | 0 | 0 | 0 |
| NM_001283 | 1 | 1 | 1 | 0 | 0 | 0 |
| NM_001284 | 1 | 1 | 1 | 1 | 1 | 1 |
| NM_001286 | 1 | 1 | 1 | 1 | 1 | 1 |
| NM_001287 | 1 | 1 | 1 | 1 | 0 | 0 |
| NM_001288 | 1 | 0 | 1 | 1 | 1 | 1 |
| NM_001289 | 1 | 1 | 1 | 1 | 0 | 0 |
| NM_001290 | 1 | 0 | 1 | 0 | 0 | 1 |
| NM_001292 | 1 | 1 | 1 | 0 | 1 | 1 |
| NM_001293 | 1 | 1 | 1 | 1 | 1 | 1 |
| NM_001294 | 1 | 0 | 1 | 1 | 0 | 0 |
| NM_001295 | 1 | 0 | 1 | 0 | 1 | 1 |
| NM_001296 | 1 | 0 | 0 | 0 | 0 | 1 |
| NM_001298 | 1 | 0 | 0 | 0 | 0 | 0 |
| NM_001300 | 1 | 0 | 1 | 0 | 0 | 0 |
| NM_001302 | 1 | 0 | 1 | 0 | 0 | 0 |
| NM_001303 | 1 | 1 | 1 | 1 | 0 | 1 |
| NM_001304 | 1 | 1 | 1 | 1 | 0 | 1 |
| NM_001305 | 1 | 1 | 1 | 1 | 0 | 0 |
| NM_001307 | 1 | 1 | 1 | 1 | 0 | 0 |
| NM_001310 | 1 | 0 | 1 | 1 | 0 | 0 |
| NM_001311 | 1 | 0 | 1 | 1 | 0 | 1 |
| NM_001312 | 1 | 0 | 1 | 0 | 0 | 1 |
| NM_001313 | 1 | 0 | 1 | 1 | 0 | 0 |
| NM_001315 | 1 | 0 | 1 | 1 | 1 | 1 |
| NM_001316 | 1 | 0 | 1 | 1 | 0 | 1 |
| NM_001317 | 1 | 0 | 1 | 1 | 1 | 0 |
| NM_001318 | 0 | 0 | 0 | 0 | 0 | 1 |
| NM_001319 | 1 | 0 | 1 | 0 | 0 | 0 |
| NM_001320 | 1 | 1 | 1 | 1 | 0 | 0 |
| NM_001322 | 1 | 0 | 1 | 0 | 0 | 0 |
| NM_001323 | 0 | 0 | 0 | 0 | 0 | 1 |
| NM_001324 | 1 | 0 | 1 | 1 | 0 | 1 |
| NM_001325 | 1 | 1 | 1 | 1 | 0 | 1 |

|           |   |   |   |   |   |   |
|-----------|---|---|---|---|---|---|
| NM_001326 | 1 | 0 | 1 | 0 | 0 | 1 |
| NM_001327 | 1 | 0 | 1 | 0 | 0 | 0 |
| NM_001328 | 1 | 1 | 1 | 1 | 0 | 0 |
| NM_001329 | 1 | 0 | 1 | 1 | 1 | 1 |
| NM_001331 | 1 | 1 | 1 | 1 | 0 | 1 |
| NM_001332 | 1 | 0 | 1 | 0 | 0 | 1 |
| NM_001333 | 1 | 1 | 1 | 1 | 0 | 0 |
| NM_001334 | 1 | 0 | 1 | 0 | 1 | 1 |
| NM_001335 | 1 | 0 | 1 | 0 | 1 | 1 |
| NM_001336 | 1 | 0 | 1 | 0 | 0 | 0 |
| NM_001337 | 1 | 1 | 1 | 1 | 0 | 0 |
| NM_001338 | 1 | 1 | 1 | 1 | 1 | 0 |
| NM_001343 | 1 | 0 | 1 | 1 | 1 | 1 |
| NM_001344 | 1 | 0 | 1 | 0 | 1 | 0 |
| NM_001345 | 1 | 1 | 1 | 1 | 0 | 0 |
| NM_001346 | 1 | 0 | 1 | 0 | 1 | 1 |
| NM_001347 | 1 | 0 | 1 | 0 | 0 | 0 |
| NM_001348 | 1 | 1 | 1 | 1 | 0 | 1 |
| NM_001349 | 1 | 1 | 1 | 1 | 0 | 0 |
| NM_001350 | 1 | 0 | 1 | 0 | 0 | 0 |
| NM_001351 | 1 | 0 | 1 | 0 | 0 | 0 |
| NM_001352 | 1 | 0 | 1 | 1 | 0 | 0 |
| NM_001353 | 1 | 0 | 1 | 0 | 1 | 0 |
| NM_001354 | 1 | 0 | 1 | 0 | 0 | 1 |
| NM_001355 | 1 | 1 | 1 | 1 | 0 | 0 |
| NM_001356 | 1 | 1 | 1 | 1 | 1 | 1 |
| NM_001357 | 1 | 0 | 1 | 1 | 0 | 1 |
| NM_001358 | 1 | 0 | 1 | 0 | 0 | 0 |
| NM_001359 | 1 | 1 | 1 | 1 | 1 | 0 |
| NM_001360 | 1 | 1 | 1 | 1 | 0 | 1 |
| NM_001361 | 1 | 1 | 1 | 1 | 0 | 0 |
| NM_001363 | 1 | 1 | 1 | 1 | 0 | 1 |
| NM_001365 | 1 | 0 | 1 | 1 | 1 | 0 |
| NM_001369 | 0 | 0 | 0 | 0 | 0 | 1 |
| NM_001371 | 1 | 1 | 1 | 1 | 0 | 0 |
| NM_001374 | 1 | 0 | 0 | 0 | 0 | 1 |
| NM_001375 | 1 | 0 | 1 | 0 | 0 | 0 |
| NM_001376 | 1 | 0 | 1 | 1 | 1 | 1 |
| NM_001378 | 1 | 0 | 1 | 0 | 0 | 0 |
| NM_001379 | 1 | 0 | 1 | 1 | 0 | 0 |
| NM_001380 | 1 | 0 | 0 | 0 | 0 | 0 |
| NM_001381 | 1 | 0 | 1 | 0 | 1 | 1 |
| NM_001382 | 1 | 1 | 1 | 1 | 0 | 1 |
| NM_001383 | 1 | 1 | 1 | 1 | 1 | 1 |
| NM_001384 | 1 | 1 | 1 | 1 | 0 | 1 |
| NM_001386 | 1 | 1 | 1 | 1 | 0 | 0 |
| NM_001387 | 1 | 0 | 1 | 0 | 0 | 1 |
| NM_001388 | 1 | 0 | 1 | 1 | 1 | 1 |
| NM_001389 | 1 | 1 | 0 | 0 | 0 | 0 |
| NM_001390 | 1 | 0 | 1 | 0 | 0 | 0 |
| NM_001391 | 0 | 0 | 0 | 0 | 0 | 1 |
| NM_001393 | 1 | 0 | 1 | 0 | 0 | 0 |

|           |   |   |   |   |   |   |
|-----------|---|---|---|---|---|---|
| NM_001394 | 1 | 1 | 1 | 0 | 0 | 1 |
| NM_001395 | 1 | 0 | 1 | 0 | 0 | 0 |
| NM_001397 | 1 | 0 | 1 | 1 | 0 | 0 |
| NM_001398 | 1 | 1 | 1 | 1 | 1 | 1 |
| NM_001399 | 1 | 1 | 0 | 0 | 0 | 1 |
| NM_001400 | 1 | 0 | 1 | 1 | 1 | 1 |
| NM_001401 | 1 | 1 | 1 | 0 | 0 | 0 |
| NM_001404 | 1 | 1 | 1 | 1 | 1 | 1 |
| NM_001405 | 1 | 0 | 1 | 1 | 0 | 1 |
| NM_001406 | 1 | 1 | 0 | 0 | 0 | 1 |
| NM_001407 | 1 | 1 | 1 | 1 | 0 | 0 |
| NM_001408 | 1 | 0 | 1 | 1 | 0 | 0 |
| NM_001412 | 1 | 0 | 1 | 1 | 1 | 1 |
| NM_001414 | 1 | 1 | 1 | 1 | 0 | 0 |
| NM_001415 | 1 | 1 | 1 | 1 | 1 | 1 |
| NM_001416 | 1 | 1 | 1 | 1 | 0 | 1 |
| NM_001417 | 1 | 0 | 1 | 0 | 0 | 1 |
| NM_001418 | 1 | 0 | 1 | 0 | 0 | 0 |
| NM_001419 | 1 | 0 | 1 | 0 | 0 | 1 |
| NM_001420 | 0 | 0 | 0 | 0 | 0 | 1 |
| NM_001421 | 1 | 1 | 1 | 1 | 1 | 1 |
| NM_001423 | 1 | 1 | 1 | 1 | 0 | 1 |
| NM_001424 | 0 | 1 | 0 | 1 | 0 | 0 |
| NM_001425 | 1 | 0 | 1 | 0 | 0 | 1 |
| NM_001426 | 0 | 0 | 0 | 1 | 0 | 0 |
| NM_001427 | 1 | 0 | 1 | 0 | 0 | 0 |
| NM_001428 | 1 | 1 | 1 | 1 | 0 | 0 |
| NM_001429 | 1 | 0 | 1 | 1 | 0 | 0 |
| NM_001430 | 1 | 0 | 0 | 0 | 0 | 0 |
| NM_001431 | 1 | 0 | 1 | 0 | 0 | 1 |
| NM_001432 | 1 | 1 | 1 | 1 | 1 | 1 |
| NM_001433 | 1 | 1 | 1 | 0 | 0 | 0 |
| NM_001436 | 1 | 0 | 1 | 1 | 1 | 1 |
| NM_001437 | 1 | 0 | 0 | 0 | 0 | 0 |
| NM_001439 | 1 | 1 | 1 | 1 | 0 | 0 |
| NM_001440 | 1 | 1 | 1 | 1 | 0 | 1 |
| NM_001441 | 1 | 1 | 1 | 1 | 0 | 0 |
| NM_001442 | 0 | 0 | 1 | 0 | 0 | 0 |
| NM_001444 | 1 | 1 | 1 | 1 | 1 | 1 |
| NM_001445 | 0 | 0 | 0 | 0 | 0 | 1 |
| NM_001446 | 0 | 1 | 1 | 0 | 0 | 0 |
| NM_001447 | 1 | 0 | 1 | 0 | 0 | 0 |
| NM_001448 | 1 | 0 | 1 | 0 | 0 | 1 |
| NM_001449 | 1 | 0 | 1 | 0 | 0 | 1 |
| NM_001450 | 1 | 0 | 1 | 0 | 0 | 1 |
| NM_001451 | 0 | 0 | 0 | 0 | 0 | 1 |
| NM_001452 | 1 | 1 | 0 | 0 | 0 | 1 |
| NM_001453 | 1 | 0 | 1 | 0 | 0 | 1 |
| NM_001454 | 1 | 0 | 1 | 1 | 0 | 0 |
| NM_001455 | 1 | 1 | 1 | 1 | 0 | 0 |
| NM_001456 | 1 | 1 | 1 | 1 | 0 | 1 |
| NM_001457 | 1 | 1 | 1 | 1 | 0 | 1 |

|           |   |   |   |   |   |   |
|-----------|---|---|---|---|---|---|
| NM_001459 | 1 | 1 | 1 | 1 | 0 | 1 |
| NM_001460 | 0 | 1 | 0 | 0 | 0 | 0 |
| NM_001461 | 1 | 1 | 1 | 1 | 1 | 1 |
| NM_001462 | 1 | 1 | 1 | 1 | 1 | 1 |
| NM_001463 | 0 | 0 | 0 | 0 | 0 | 1 |
| NM_001464 | 1 | 1 | 1 | 1 | 0 | 0 |
| NM_001465 | 1 | 0 | 1 | 0 | 1 | 1 |
| NM_001466 | 1 | 1 | 1 | 1 | 1 | 1 |
| NM_001467 | 1 | 0 | 1 | 1 | 1 | 1 |
| NM_001468 | 1 | 1 | 1 | 1 | 0 | 0 |
| NM_001469 | 1 | 0 | 1 | 0 | 0 | 1 |
| NM_001470 | 1 | 0 | 1 | 0 | 0 | 0 |
| NM_001472 | 1 | 0 | 1 | 0 | 0 | 0 |
| NM_001474 | 1 | 0 | 1 | 0 | 0 | 1 |
| NM_001475 | 1 | 1 | 1 | 0 | 0 | 1 |
| NM_001476 | 1 | 0 | 1 | 1 | 0 | 0 |
| NM_001477 | 1 | 1 | 1 | 1 | 0 | 0 |
| NM_001478 | 1 | 0 | 1 | 0 | 0 | 0 |
| NM_001480 | 1 | 0 | 0 | 0 | 0 | 1 |
| NM_001481 | 1 | 0 | 1 | 1 | 1 | 1 |
| NM_001482 | 1 | 1 | 1 | 1 | 0 | 1 |
| NM_001483 | 1 | 1 | 1 | 1 | 0 | 1 |
| NM_001485 | 1 | 1 | 1 | 1 | 0 | 1 |
| NM_001487 | 1 | 0 | 1 | 1 | 1 | 1 |
| NM_001488 | 1 | 0 | 1 | 1 | 0 | 0 |
| NM_001489 | 0 | 0 | 0 | 0 | 0 | 1 |
| NM_001490 | 1 | 1 | 1 | 1 | 0 | 0 |
| NM_001491 | 0 | 0 | 0 | 0 | 0 | 1 |
| NM_001492 | 1 | 0 | 1 | 0 | 0 | 1 |
| NM_001493 | 1 | 0 | 1 | 0 | 0 | 1 |
| NM_001494 | 1 | 0 | 1 | 0 | 0 | 0 |
| NM_001495 | 1 | 0 | 1 | 1 | 0 | 1 |
| NM_001496 | 1 | 0 | 1 | 0 | 0 | 1 |
| NM_001497 | 1 | 0 | 1 | 0 | 0 | 1 |
| NM_001498 | 1 | 0 | 1 | 0 | 0 | 1 |
| NM_001499 | 1 | 0 | 1 | 0 | 1 | 0 |
| NM_001500 | 1 | 0 | 1 | 0 | 0 | 0 |
| NM_001502 | 1 | 1 | 1 | 1 | 0 | 0 |
| NM_001503 | 1 | 0 | 1 | 1 | 1 | 1 |
| NM_001504 | 1 | 0 | 1 | 0 | 0 | 1 |
| NM_001505 | 1 | 1 | 1 | 1 | 0 | 0 |
| NM_001509 | 1 | 0 | 1 | 0 | 0 | 1 |
| NM_001510 | 1 | 0 | 1 | 1 | 0 | 0 |
| NM_001511 | 1 | 1 | 1 | 0 | 1 | 1 |
| NM_001512 | 1 | 0 | 1 | 0 | 0 | 0 |
| NM_001513 | 1 | 0 | 1 | 1 | 1 | 0 |
| NM_001514 | 1 | 0 | 1 | 1 | 1 | 1 |
| NM_001515 | 1 | 0 | 1 | 1 | 0 | 0 |
| NM_001516 | 1 | 0 | 1 | 0 | 0 | 0 |
| NM_001517 | 1 | 1 | 1 | 1 | 0 | 0 |
| NM_001518 | 1 | 0 | 1 | 1 | 0 | 1 |
| NM_001520 | 1 | 0 | 1 | 0 | 1 | 0 |

|           |   |   |   |   |   |   |
|-----------|---|---|---|---|---|---|
| NM_001521 | 1 | 1 | 1 | 1 | 0 | 0 |
| NM_001523 | 1 | 0 | 1 | 1 | 0 | 1 |
| NM_001524 | 1 | 0 | 1 | 0 | 0 | 0 |
| NM_001525 | 1 | 0 | 1 | 0 | 1 | 0 |
| NM_001526 | 1 | 0 | 1 | 0 | 0 | 0 |
| NM_001527 | 1 | 0 | 1 | 0 | 0 | 1 |
| NM_001528 | 1 | 0 | 1 | 1 | 1 | 0 |
| NM_001529 | 1 | 0 | 1 | 1 | 1 | 0 |
| NM_001530 | 1 | 1 | 1 | 1 | 0 | 1 |
| NM_001531 | 1 | 1 | 1 | 1 | 1 | 1 |
| NM_001532 | 1 | 0 | 1 | 0 | 0 | 1 |
| NM_001533 | 1 | 0 | 1 | 1 | 0 | 0 |
| NM_001534 | 1 | 1 | 1 | 1 | 0 | 0 |
| NM_001535 | 1 | 0 | 1 | 0 | 1 | 1 |
| NM_001536 | 1 | 0 | 1 | 0 | 0 | 1 |
| NM_001537 | 1 | 1 | 1 | 1 | 0 | 0 |
| NM_001538 | 1 | 0 | 1 | 0 | 0 | 0 |
| NM_001539 | 1 | 0 | 1 | 0 | 1 | 1 |
| NM_001540 | 1 | 1 | 1 | 1 | 1 | 1 |
| NM_001541 | 1 | 0 | 0 | 0 | 0 | 1 |
| NM_001542 | 1 | 0 | 1 | 0 | 1 | 1 |
| NM_001543 | 1 | 0 | 1 | 1 | 1 | 1 |
| NM_001544 | 1 | 0 | 1 | 0 | 1 | 1 |
| NM_001545 | 1 | 0 | 1 | 1 | 0 | 1 |
| NM_001546 | 0 | 0 | 0 | 0 | 0 | 1 |
| NM_001547 | 1 | 1 | 1 | 1 | 1 | 1 |
| NM_001548 | 1 | 1 | 1 | 1 | 0 | 0 |
| NM_001549 | 1 | 0 | 1 | 0 | 1 | 1 |
| NM_001550 | 1 | 1 | 1 | 1 | 0 | 1 |
| NM_001551 | 1 | 0 | 1 | 1 | 0 | 0 |
| NM_001552 | 1 | 0 | 1 | 1 | 0 | 1 |
| NM_001553 | 1 | 1 | 1 | 1 | 0 | 1 |
| NM_001555 | 1 | 1 | 0 | 0 | 0 | 1 |
| NM_001557 | 1 | 0 | 1 | 0 | 0 | 0 |
| NM_001558 | 1 | 0 | 1 | 0 | 1 | 1 |
| NM_001559 | 1 | 0 | 1 | 0 | 0 | 1 |
| NM_001560 | 1 | 1 | 1 | 1 | 1 | 1 |
| NM_001561 | 1 | 0 | 1 | 1 | 0 | 0 |
| NM_001562 | 1 | 1 | 1 | 1 | 0 | 1 |
| NM_001564 | 1 | 0 | 1 | 0 | 0 | 0 |
| NM_001565 | 1 | 1 | 1 | 1 | 0 | 1 |
| NM_001566 | 1 | 0 | 1 | 0 | 0 | 0 |
| NM_001567 | 1 | 1 | 1 | 1 | 0 | 1 |
| NM_001568 | 1 | 1 | 1 | 1 | 1 | 1 |
| NM_001569 | 1 | 1 | 1 | 1 | 1 | 1 |
| NM_001570 | 1 | 0 | 1 | 1 | 0 | 0 |
| NM_001571 | 1 | 1 | 1 | 1 | 0 | 0 |
| NM_001572 | 1 | 0 | 1 | 0 | 1 | 1 |
| NM_001584 | 0 | 0 | 0 | 0 | 0 | 1 |
| NM_001585 | 1 | 0 | 1 | 1 | 0 | 0 |
| NM_001586 | 1 | 1 | 1 | 0 | 0 | 1 |
| NM_001604 | 1 | 0 | 0 | 0 | 0 | 0 |

|           |   |   |   |   |   |   |
|-----------|---|---|---|---|---|---|
| NM_001605 | 1 | 1 | 1 | 1 | 0 | 0 |
| NM_001606 | 1 | 0 | 1 | 1 | 0 | 1 |
| NM_001607 | 1 | 0 | 1 | 0 | 0 | 1 |
| NM_001609 | 1 | 1 | 1 | 1 | 1 | 1 |
| NM_001610 | 1 | 0 | 1 | 0 | 0 | 1 |
| NM_001611 | 1 | 0 | 1 | 1 | 0 | 1 |
| NM_001613 | 1 | 0 | 1 | 0 | 1 | 1 |
| NM_001614 | 1 | 0 | 1 | 0 | 0 | 0 |
| NM_001615 | 0 | 0 | 0 | 0 | 0 | 1 |
| NM_001616 | 1 | 0 | 1 | 1 | 0 | 0 |
| NM_001617 | 1 | 1 | 1 | 1 | 0 | 0 |
| NM_001618 | 1 | 0 | 1 | 0 | 0 | 1 |
| NM_001619 | 0 | 0 | 1 | 0 | 0 | 0 |
| NM_001621 | 1 | 1 | 1 | 1 | 0 | 1 |
| NM_001622 | 0 | 0 | 0 | 0 | 0 | 1 |
| NM_001623 | 1 | 0 | 1 | 1 | 0 | 0 |
| NM_001625 | 1 | 1 | 1 | 1 | 1 | 1 |
| NM_001626 | 1 | 0 | 1 | 0 | 0 | 0 |
| NM_001627 | 1 | 1 | 1 | 1 | 0 | 1 |
| NM_001628 | 1 | 0 | 1 | 1 | 1 | 1 |
| NM_001629 | 1 | 1 | 1 | 1 | 1 | 1 |
| NM_001630 | 1 | 0 | 1 | 0 | 0 | 1 |
| NM_001632 | 1 | 1 | 1 | 1 | 0 | 0 |
| NM_001633 | 0 | 0 | 0 | 0 | 0 | 1 |
| NM_001634 | 1 | 1 | 1 | 1 | 0 | 0 |
| NM_001635 | 1 | 1 | 1 | 1 | 0 | 1 |
| NM_001636 | 1 | 1 | 1 | 1 | 0 | 0 |
| NM_001637 | 1 | 1 | 1 | 1 | 0 | 0 |
| NM_001638 | 1 | 1 | 1 | 1 | 0 | 0 |
| NM_001639 | 0 | 0 | 0 | 0 | 0 | 1 |
| NM_001640 | 1 | 0 | 1 | 1 | 0 | 0 |
| NM_001641 | 1 | 1 | 1 | 1 | 0 | 0 |
| NM_001642 | 1 | 1 | 1 | 1 | 0 | 1 |
| NM_001643 | 1 | 1 | 1 | 1 | 0 | 1 |
| NM_001645 | 0 | 0 | 1 | 0 | 0 | 0 |
| NM_001646 | 1 | 0 | 1 | 0 | 0 | 0 |
| NM_001647 | 1 | 0 | 0 | 0 | 0 | 0 |
| NM_001648 | 1 | 0 | 1 | 1 | 1 | 1 |
| NM_001649 | 1 | 0 | 1 | 0 | 0 | 0 |
| NM_001650 | 0 | 0 | 0 | 0 | 0 | 1 |
| NM_001651 | 1 | 0 | 0 | 0 | 0 | 0 |
| NM_001652 | 1 | 0 | 1 | 0 | 0 | 0 |
| NM_001654 | 1 | 0 | 1 | 0 | 0 | 1 |
| NM_001655 | 1 | 0 | 1 | 0 | 1 | 1 |
| NM_001656 | 1 | 1 | 1 | 1 | 0 | 1 |
| NM_001657 | 1 | 1 | 1 | 1 | 1 | 0 |
| NM_001659 | 1 | 0 | 1 | 1 | 0 | 0 |
| NM_001660 | 1 | 0 | 1 | 1 | 0 | 0 |
| NM_001661 | 1 | 0 | 1 | 0 | 0 | 1 |
| NM_001662 | 0 | 1 | 0 | 1 | 0 | 0 |
| NM_001663 | 1 | 0 | 1 | 0 | 0 | 0 |
| NM_001664 | 1 | 1 | 1 | 1 | 0 | 1 |

|           |   |   |   |   |   |   |
|-----------|---|---|---|---|---|---|
| NM_001665 | 1 | 0 | 1 | 1 | 0 | 0 |
| NM_001666 | 1 | 0 | 1 | 0 | 0 | 0 |
| NM_001667 | 1 | 0 | 1 | 0 | 0 | 0 |
| NM_001669 | 1 | 0 | 1 | 0 | 0 | 0 |
| NM_001670 | 1 | 1 | 1 | 1 | 0 | 0 |
| NM_001671 | 1 | 1 | 1 | 1 | 1 | 1 |
| NM_001672 | 1 | 0 | 1 | 1 | 0 | 0 |
| NM_001673 | 1 | 0 | 1 | 1 | 1 | 1 |
| NM_001674 | 1 | 1 | 1 | 1 | 1 | 1 |
| NM_001675 | 1 | 0 | 1 | 1 | 0 | 0 |
| NM_001677 | 1 | 0 | 1 | 1 | 0 | 0 |
| NM_001678 | 1 | 1 | 1 | 1 | 0 | 0 |
| NM_001679 | 1 | 1 | 1 | 1 | 0 | 1 |
| NM_001680 | 1 | 0 | 1 | 0 | 0 | 0 |
| NM_001681 | 1 | 1 | 1 | 1 | 0 | 1 |
| NM_001682 | 1 | 1 | 1 | 1 | 0 | 1 |
| NM_001684 | 1 | 1 | 1 | 1 | 0 | 1 |
| NM_001685 | 1 | 1 | 1 | 1 | 0 | 1 |
| NM_001686 | 1 | 1 | 1 | 1 | 0 | 1 |
| NM_001687 | 1 | 0 | 1 | 1 | 0 | 0 |
| NM_001688 | 1 | 0 | 1 | 1 | 0 | 1 |
| NM_001689 | 1 | 1 | 1 | 1 | 0 | 1 |
| NM_001690 | 1 | 0 | 1 | 1 | 0 | 1 |
| NM_001693 | 1 | 1 | 1 | 1 | 1 | 1 |
| NM_001694 | 1 | 1 | 1 | 1 | 1 | 1 |
| NM_001695 | 1 | 0 | 1 | 1 | 1 | 1 |
| NM_001696 | 1 | 0 | 1 | 0 | 0 | 1 |
| NM_001697 | 1 | 1 | 1 | 1 | 0 | 0 |
| NM_001698 | 1 | 0 | 1 | 0 | 1 | 1 |
| NM_001699 | 1 | 0 | 1 | 0 | 0 | 0 |
| NM_001700 | 1 | 1 | 1 | 1 | 0 | 0 |
| NM_001702 | 1 | 0 | 1 | 0 | 0 | 1 |
| NM_001703 | 0 | 0 | 1 | 0 | 0 | 0 |
| NM_001704 | 0 | 0 | 1 | 0 | 0 | 0 |
| NM_001706 | 1 | 1 | 1 | 1 | 1 | 1 |
| NM_001707 | 1 | 0 | 1 | 1 | 0 | 0 |
| NM_001708 | 1 | 0 | 1 | 0 | 0 | 1 |
| NM_001709 | 1 | 0 | 1 | 0 | 1 | 0 |
| NM_001710 | 0 | 0 | 1 | 0 | 1 | 1 |
| NM_001711 | 1 | 1 | 1 | 1 | 0 | 0 |
| NM_001712 | 1 | 1 | 1 | 1 | 0 | 0 |
| NM_001714 | 1 | 0 | 1 | 1 | 0 | 0 |
| NM_001715 | 1 | 0 | 1 | 1 | 1 | 1 |
| NM_001716 | 1 | 1 | 1 | 1 | 0 | 0 |
| NM_001718 | 1 | 0 | 1 | 0 | 0 | 1 |
| NM_001720 | 1 | 0 | 1 | 1 | 0 | 0 |
| NM_001721 | 1 | 1 | 1 | 1 | 0 | 1 |
| NM_001722 | 1 | 0 | 1 | 0 | 0 | 0 |
| NM_001724 | 1 | 0 | 1 | 0 | 0 | 0 |
| NM_001725 | 1 | 1 | 1 | 1 | 0 | 1 |
| NM_001726 | 0 | 1 | 0 | 1 | 0 | 0 |
| NM_001727 | 1 | 0 | 1 | 1 | 0 | 0 |

|           |   |   |   |   |   |   |
|-----------|---|---|---|---|---|---|
| NM_001728 | 1 | 0 | 1 | 1 | 1 | 1 |
| NM_001729 | 1 | 0 | 0 | 0 | 0 | 0 |
| NM_001730 | 1 | 0 | 1 | 0 | 0 | 0 |
| NM_001731 | 1 | 0 | 1 | 0 | 1 | 1 |
| NM_001732 | 1 | 1 | 1 | 1 | 0 | 0 |
| NM_001733 | 1 | 1 | 1 | 1 | 1 | 0 |
| NM_001734 | 1 | 0 | 1 | 1 | 0 | 0 |
| NM_001735 | 1 | 1 | 1 | 0 | 1 | 0 |
| NM_001736 | 1 | 1 | 1 | 1 | 1 | 1 |
| NM_001738 | 1 | 0 | 1 | 1 | 0 | 1 |
| NM_001739 | 1 | 0 | 1 | 0 | 0 | 1 |
| NM_001741 | 1 | 0 | 1 | 1 | 0 | 0 |
| NM_001742 | 1 | 0 | 1 | 0 | 0 | 0 |
| NM_001743 | 1 | 0 | 1 | 0 | 0 | 0 |
| NM_001744 | 1 | 1 | 1 | 1 | 0 | 1 |
| NM_001745 | 1 | 0 | 1 | 0 | 1 | 0 |
| NM_001746 | 1 | 1 | 1 | 1 | 0 | 0 |
| NM_001747 | 1 | 1 | 1 | 1 | 1 | 1 |
| NM_001748 | 1 | 0 | 1 | 1 | 0 | 0 |
| NM_001749 | 1 | 1 | 1 | 1 | 0 | 0 |
| NM_001750 | 1 | 1 | 1 | 1 | 0 | 1 |
| NM_001751 | 1 | 0 | 1 | 0 | 0 | 0 |
| NM_001752 | 1 | 1 | 1 | 1 | 1 | 0 |
| NM_001753 | 0 | 0 | 1 | 0 | 0 | 0 |
| NM_001754 | 1 | 1 | 1 | 0 | 1 | 1 |
| NM_001755 | 1 | 0 | 1 | 0 | 0 | 1 |
| NM_001756 | 1 | 0 | 1 | 0 | 0 | 1 |
| NM_001757 | 1 | 1 | 1 | 1 | 1 | 1 |
| NM_001758 | 1 | 0 | 1 | 1 | 0 | 0 |
| NM_001759 | 1 | 0 | 1 | 0 | 0 | 1 |
| NM_001760 | 1 | 1 | 1 | 1 | 0 | 1 |
| NM_001761 | 1 | 0 | 1 | 0 | 0 | 1 |
| NM_001762 | 1 | 1 | 1 | 1 | 0 | 0 |
| NM_001763 | 1 | 1 | 1 | 1 | 0 | 1 |
| NM_001764 | 1 | 0 | 0 | 0 | 0 | 1 |
| NM_001765 | 1 | 1 | 1 | 1 | 1 | 1 |
| NM_001766 | 1 | 1 | 1 | 1 | 1 | 1 |
| NM_001767 | 1 | 1 | 1 | 1 | 1 | 1 |
| NM_001768 | 1 | 0 | 1 | 0 | 0 | 1 |
| NM_001769 | 1 | 1 | 1 | 1 | 0 | 1 |
| NM_001770 | 1 | 0 | 1 | 0 | 0 | 1 |
| NM_001771 | 1 | 0 | 1 | 1 | 0 | 0 |
| NM_001772 | 1 | 1 | 1 | 1 | 1 | 1 |
| NM_001773 | 1 | 1 | 1 | 1 | 0 | 1 |
| NM_001774 | 1 | 0 | 1 | 0 | 0 | 1 |
| NM_001775 | 1 | 1 | 1 | 1 | 0 | 0 |
| NM_001776 | 1 | 1 | 1 | 1 | 0 | 1 |
| NM_001777 | 1 | 0 | 1 | 1 | 1 | 1 |
| NM_001778 | 1 | 0 | 1 | 1 | 0 | 0 |
| NM_001779 | 1 | 1 | 1 | 1 | 1 | 1 |
| NM_001780 | 1 | 1 | 1 | 1 | 1 | 1 |
| NM_001781 | 1 | 1 | 1 | 1 | 0 | 0 |



|           |   |   |   |   |   |   |
|-----------|---|---|---|---|---|---|
| NM_001782 | 1 | 0 | 1 | 0 | 1 | 0 |
| NM_001783 | 1 | 0 | 1 | 0 | 0 | 0 |
| NM_001785 | 1 | 1 | 1 | 1 | 0 | 0 |
| NM_001786 | 1 | 0 | 1 | 0 | 0 | 1 |
| NM_001788 | 1 | 0 | 1 | 0 | 0 | 0 |
| NM_001789 | 1 | 0 | 1 | 0 | 0 | 1 |
| NM_001790 | 1 | 0 | 1 | 0 | 0 | 1 |
| NM_001791 | 1 | 0 | 1 | 0 | 0 | 1 |
| NM_001792 | 1 | 0 | 1 | 1 | 0 | 0 |
| NM_001793 | 1 | 0 | 1 | 1 | 0 | 0 |
| NM_001794 | 1 | 0 | 1 | 1 | 1 | 1 |
| NM_001795 | 0 | 0 | 0 | 0 | 0 | 1 |
| NM_001797 | 0 | 1 | 0 | 1 | 0 | 0 |
| NM_001798 | 1 | 0 | 1 | 1 | 0 | 1 |
| NM_001799 | 1 | 0 | 1 | 0 | 0 | 1 |
| NM_001800 | 1 | 0 | 1 | 0 | 0 | 0 |
| NM_001801 | 1 | 0 | 1 | 0 | 0 | 1 |
| NM_001803 | 1 | 0 | 1 | 1 | 0 | 0 |
| NM_001805 | 1 | 1 | 1 | 1 | 1 | 1 |
| NM_001806 | 1 | 0 | 1 | 1 | 1 | 1 |
| NM_001807 | 1 | 1 | 1 | 1 | 0 | 1 |
| NM_001808 | 1 | 0 | 1 | 1 | 1 | 1 |
| NM_001809 | 1 | 0 | 1 | 0 | 1 | 1 |
| NM_001810 | 1 | 1 | 1 | 1 | 0 | 0 |
| NM_001812 | 1 | 0 | 1 | 1 | 1 | 1 |
| NM_001813 | 1 | 1 | 1 | 1 | 0 | 0 |
| NM_001814 | 1 | 0 | 1 | 0 | 0 | 0 |
| NM_001815 | 1 | 1 | 1 | 1 | 0 | 0 |
| NM_001816 | 1 | 1 | 1 | 1 | 0 | 1 |
| NM_001817 | 1 | 1 | 1 | 1 | 0 | 1 |
| NM_001819 | 1 | 0 | 1 | 0 | 0 | 1 |
| NM_001821 | 1 | 0 | 1 | 0 | 0 | 0 |
| NM_001822 | 1 | 0 | 1 | 0 | 0 | 1 |
| NM_001823 | 1 | 0 | 1 | 0 | 0 | 1 |
| NM_001824 | 1 | 1 | 1 | 0 | 0 | 1 |
| NM_001825 | 1 | 0 | 1 | 0 | 0 | 0 |
| NM_001826 | 1 | 0 | 1 | 0 | 1 | 1 |
| NM_001827 | 1 | 0 | 1 | 0 | 0 | 1 |
| NM_001828 | 1 | 1 | 1 | 1 | 1 | 1 |
| NM_001829 | 1 | 0 | 1 | 0 | 0 | 0 |
| NM_001830 | 1 | 1 | 1 | 1 | 1 | 1 |
| NM_001831 | 1 | 0 | 1 | 1 | 0 | 1 |
| NM_001832 | 1 | 0 | 0 | 0 | 0 | 1 |
| NM_001833 | 1 | 1 | 1 | 0 | 0 | 0 |
| NM_001835 | 1 | 1 | 1 | 0 | 1 | 1 |
| NM_001836 | 1 | 1 | 0 | 0 | 0 | 1 |
| NM_001837 | 1 | 1 | 1 | 1 | 0 | 0 |
| NM_001838 | 1 | 1 | 1 | 1 | 0 | 1 |
| NM_001839 | 1 | 1 | 1 | 1 | 0 | 1 |
| NM_001840 | 1 | 1 | 1 | 1 | 0 | 1 |
| NM_001841 | 1 | 1 | 1 | 1 | 0 | 1 |
| NM_001843 | 1 | 0 | 1 | 0 | 0 | 0 |

|           |   |   |   |   |   |   |
|-----------|---|---|---|---|---|---|
| NM_001844 | 1 | 0 | 1 | 0 | 0 | 0 |
| NM_001845 | 1 | 0 | 1 | 1 | 0 | 0 |
| NM_001846 | 1 | 0 | 0 | 0 | 0 | 0 |
| NM_001847 | 0 | 0 | 0 | 0 | 0 | 1 |
| NM_001848 | 1 | 1 | 1 | 1 | 0 | 0 |
| NM_001849 | 1 | 0 | 1 | 1 | 1 | 1 |
| NM_001851 | 0 | 0 | 0 | 0 | 0 | 1 |
| NM_001852 | 1 | 1 | 1 | 1 | 0 | 1 |
| NM_001853 | 1 | 0 | 1 | 1 | 1 | 1 |
| NM_001855 | 1 | 1 | 1 | 1 | 0 | 0 |
| NM_001856 | 1 | 0 | 1 | 1 | 0 | 0 |
| NM_001858 | 0 | 0 | 1 | 0 | 0 | 0 |
| NM_001859 | 1 | 1 | 1 | 1 | 1 | 1 |
| NM_001860 | 1 | 1 | 1 | 1 | 0 | 1 |
| NM_001861 | 1 | 0 | 1 | 1 | 1 | 0 |
| NM_001862 | 1 | 0 | 1 | 0 | 1 | 0 |
| NM_001863 | 1 | 0 | 1 | 0 | 1 | 0 |
| NM_001864 | 1 | 0 | 1 | 0 | 0 | 1 |
| NM_001865 | 1 | 0 | 1 | 0 | 1 | 1 |
| NM_001866 | 1 | 1 | 1 | 0 | 1 | 1 |
| NM_001867 | 1 | 1 | 1 | 1 | 0 | 1 |
| NM_001868 | 1 | 0 | 0 | 0 | 0 | 0 |
| NM_001869 | 1 | 0 | 0 | 0 | 0 | 0 |
| NM_001870 | 1 | 0 | 1 | 0 | 1 | 1 |
| NM_001871 | 1 | 0 | 1 | 0 | 0 | 1 |
| NM_001873 | 0 | 0 | 1 | 0 | 0 | 0 |
| NM_001874 | 1 | 1 | 1 | 1 | 0 | 1 |
| NM_001875 | 1 | 0 | 1 | 0 | 0 | 0 |
| NM_001876 | 1 | 1 | 1 | 1 | 1 | 1 |
| NM_001877 | 1 | 1 | 1 | 1 | 0 | 1 |
| NM_001878 | 1 | 1 | 1 | 1 | 0 | 0 |
| NM_001879 | 1 | 1 | 1 | 1 | 0 | 0 |
| NM_001880 | 1 | 0 | 1 | 0 | 1 | 1 |
| NM_001881 | 1 | 1 | 1 | 1 | 1 | 1 |
| NM_001882 | 1 | 0 | 1 | 0 | 0 | 0 |
| NM_001883 | 1 | 0 | 1 | 0 | 0 | 0 |
| NM_001886 | 1 | 0 | 1 | 0 | 0 | 0 |
| NM_001887 | 1 | 0 | 1 | 0 | 0 | 0 |
| NM_001888 | 1 | 0 | 1 | 0 | 1 | 1 |
| NM_001889 | 1 | 0 | 1 | 0 | 0 | 0 |
| NM_001890 | 0 | 0 | 0 | 0 | 0 | 1 |
| NM_001891 | 1 | 1 | 0 | 0 | 0 | 0 |
| NM_001892 | 1 | 0 | 1 | 0 | 1 | 1 |
| NM_001893 | 1 | 0 | 1 | 1 | 1 | 1 |
| NM_001894 | 1 | 1 | 1 | 1 | 0 | 0 |
| NM_001895 | 1 | 0 | 1 | 0 | 0 | 1 |
| NM_001896 | 1 | 1 | 1 | 1 | 0 | 0 |
| NM_001898 | 0 | 0 | 0 | 0 | 0 | 1 |
| NM_001899 | 1 | 1 | 1 | 0 | 1 | 1 |
| NM_001901 | 1 | 0 | 1 | 1 | 0 | 0 |
| NM_001902 | 1 | 0 | 0 | 0 | 0 | 0 |
| NM_001903 | 1 | 1 | 1 | 0 | 1 | 1 |

|           |   |   |   |   |   |   |
|-----------|---|---|---|---|---|---|
| NM_001904 | 1 | 0 | 1 | 0 | 0 | 0 |
| NM_001905 | 1 | 1 | 1 | 1 | 0 | 0 |
| NM_001907 | 1 | 1 | 1 | 1 | 1 | 1 |
| NM_001908 | 1 | 1 | 1 | 1 | 1 | 0 |
| NM_001909 | 1 | 1 | 1 | 0 | 0 | 1 |
| NM_001911 | 1 | 0 | 1 | 0 | 1 | 1 |
| NM_001912 | 1 | 1 | 1 | 1 | 0 | 1 |
| NM_001914 | 1 | 1 | 1 | 1 | 0 | 1 |
| NM_001915 | 1 | 0 | 1 | 0 | 0 | 1 |
| NM_001916 | 1 | 1 | 1 | 1 | 0 | 0 |
| NM_001918 | 1 | 0 | 1 | 0 | 1 | 1 |
| NM_001919 | 1 | 1 | 1 | 1 | 0 | 1 |
| NM_001920 | 1 | 0 | 1 | 0 | 0 | 1 |
| NM_001921 | 1 | 1 | 1 | 1 | 1 | 1 |
| NM_001922 | 1 | 0 | 0 | 0 | 0 | 1 |
| NM_001923 | 1 | 1 | 1 | 1 | 0 | 1 |
| NM_001924 | 1 | 1 | 1 | 1 | 1 | 1 |
| NM_001925 | 1 | 1 | 1 | 1 | 0 | 1 |
| NM_001927 | 1 | 1 | 1 | 1 | 1 | 0 |
| NM_001928 | 1 | 0 | 1 | 0 | 0 | 1 |
| NM_001930 | 1 | 0 | 1 | 0 | 0 | 0 |
| NM_001931 | 1 | 0 | 1 | 1 | 1 | 1 |
| NM_001932 | 0 | 0 | 1 | 1 | 0 | 0 |
| NM_001933 | 1 | 0 | 1 | 0 | 0 | 0 |
| NM_001934 | 1 | 0 | 1 | 0 | 0 | 0 |
| NM_001935 | 1 | 0 | 1 | 1 | 0 | 0 |
| NM_001936 | 0 | 0 | 1 | 0 | 0 | 0 |
| NM_001937 | 1 | 0 | 0 | 0 | 0 | 0 |
| NM_001938 | 1 | 0 | 1 | 0 | 1 | 1 |
| NM_001939 | 1 | 1 | 1 | 1 | 1 | 0 |
| NM_001940 | 1 | 0 | 1 | 1 | 0 | 0 |
| NM_001941 | 1 | 0 | 1 | 0 | 0 | 0 |
| NM_001942 | 1 | 0 | 0 | 0 | 0 | 0 |
| NM_001943 | 1 | 0 | 1 | 0 | 0 | 0 |
| NM_001945 | 1 | 1 | 1 | 1 | 0 | 1 |
| NM_001946 | 1 | 0 | 1 | 0 | 1 | 1 |
| NM_001948 | 1 | 0 | 1 | 0 | 0 | 0 |
| NM_001949 | 1 | 0 | 1 | 1 | 1 | 0 |
| NM_001950 | 1 | 0 | 1 | 0 | 0 | 0 |
| NM_001951 | 1 | 0 | 1 | 0 | 1 | 0 |
| NM_001952 | 1 | 0 | 0 | 0 | 0 | 1 |
| NM_001953 | 1 | 1 | 1 | 1 | 1 | 1 |
| NM_001954 | 1 | 1 | 1 | 1 | 0 | 1 |
| NM_001955 | 1 | 1 | 1 | 1 | 0 | 0 |
| NM_001957 | 1 | 0 | 0 | 0 | 0 | 1 |
| NM_001958 | 1 | 0 | 1 | 0 | 0 | 0 |
| NM_001959 | 0 | 0 | 1 | 1 | 0 | 0 |
| NM_001960 | 0 | 0 | 1 | 1 | 0 | 0 |
| NM_001963 | 1 | 0 | 1 | 0 | 0 | 1 |
| NM_001964 | 1 | 1 | 1 | 1 | 1 | 1 |
| NM_001965 | 0 | 1 | 0 | 0 | 0 | 1 |
| NM_001966 | 1 | 0 | 1 | 0 | 0 | 0 |

|           |   |   |   |   |   |   |
|-----------|---|---|---|---|---|---|
| NM_001967 | 1 | 0 | 1 | 1 | 1 | 1 |
| NM_001968 | 1 | 0 | 1 | 0 | 0 | 0 |
| NM_001969 | 1 | 0 | 1 | 1 | 0 | 0 |
| NM_001970 | 1 | 0 | 1 | 1 | 0 | 1 |
| NM_001971 | 1 | 1 | 1 | 1 | 0 | 1 |
| NM_001972 | 1 | 1 | 1 | 1 | 1 | 1 |
| NM_001973 | 1 | 0 | 1 | 0 | 1 | 1 |
| NM_001974 | 1 | 1 | 1 | 1 | 0 | 0 |
| NM_001975 | 1 | 0 | 1 | 0 | 0 | 1 |
| NM_001976 | 1 | 0 | 0 | 0 | 0 | 1 |
| NM_001977 | 1 | 0 | 1 | 0 | 0 | 0 |
| NM_001978 | 1 | 0 | 1 | 0 | 0 | 0 |
| NM_001979 | 1 | 1 | 1 | 1 | 1 | 1 |
| NM_001980 | 1 | 1 | 1 | 1 | 0 | 1 |
| NM_001981 | 1 | 0 | 1 | 0 | 0 | 1 |
| NM_001982 | 1 | 0 | 1 | 1 | 0 | 0 |
| NM_001983 | 1 | 1 | 1 | 1 | 0 | 0 |
| NM_001984 | 1 | 1 | 1 | 1 | 0 | 0 |
| NM_001985 | 1 | 0 | 1 | 1 | 0 | 1 |
| NM_001986 | 1 | 0 | 1 | 1 | 1 | 1 |
| NM_001987 | 1 | 0 | 1 | 1 | 1 | 1 |
| NM_001988 | 1 | 1 | 1 | 0 | 0 | 1 |
| NM_001989 | 1 | 0 | 1 | 0 | 0 | 0 |
| NM_001990 | 1 | 1 | 1 | 1 | 1 | 1 |
| NM_001991 | 1 | 0 | 1 | 0 | 1 | 1 |
| NM_001992 | 1 | 1 | 1 | 0 | 1 | 0 |
| NM_001993 | 1 | 0 | 1 | 0 | 0 | 1 |
| NM_001994 | 1 | 0 | 1 | 0 | 0 | 0 |
| NM_001995 | 1 | 1 | 1 | 1 | 1 | 1 |
| NM_001996 | 0 | 0 | 1 | 0 | 0 | 1 |
| NM_001998 | 1 | 1 | 1 | 1 | 0 | 0 |
| NM_001999 | 1 | 1 | 1 | 1 | 1 | 1 |
| NM_002001 | 1 | 1 | 1 | 1 | 1 | 1 |
| NM_002002 | 1 | 1 | 1 | 1 | 0 | 1 |
| NM_002003 | 1 | 1 | 1 | 1 | 0 | 0 |
| NM_002004 | 1 | 0 | 1 | 0 | 0 | 1 |
| NM_002005 | 1 | 1 | 1 | 1 | 1 | 0 |
| NM_002006 | 1 | 0 | 1 | 0 | 0 | 1 |
| NM_002009 | 1 | 0 | 1 | 0 | 0 | 0 |
| NM_002010 | 1 | 1 | 1 | 1 | 1 | 1 |
| NM_002011 | 1 | 0 | 1 | 0 | 0 | 0 |
| NM_002012 | 1 | 1 | 1 | 1 | 0 | 1 |
| NM_002013 | 1 | 0 | 1 | 0 | 0 | 1 |
| NM_002014 | 1 | 1 | 1 | 1 | 0 | 1 |
| NM_002015 | 1 | 1 | 1 | 1 | 0 | 0 |
| NM_002017 | 1 | 1 | 1 | 1 | 0 | 1 |
| NM_002018 | 1 | 1 | 1 | 1 | 0 | 1 |
| NM_002019 | 1 | 0 | 1 | 0 | 0 | 0 |
| NM_002020 | 1 | 1 | 1 | 1 | 0 | 0 |
| NM_002021 | 1 | 0 | 1 | 0 | 0 | 0 |
| NM_002022 | 1 | 1 | 1 | 1 | 0 | 0 |
| NM_002024 | 1 | 0 | 1 | 1 | 0 | 1 |

|           |   |   |   |   |   |   |
|-----------|---|---|---|---|---|---|
| NM_002026 | 1 | 1 | 1 | 1 | 0 | 0 |
| NM_002027 | 1 | 0 | 1 | 1 | 0 | 1 |
| NM_002028 | 1 | 0 | 1 | 0 | 0 | 0 |
| NM_002029 | 1 | 0 | 1 | 0 | 0 | 0 |
| NM_002030 | 1 | 0 | 1 | 1 | 0 | 0 |
| NM_002032 | 1 | 0 | 1 | 0 | 0 | 0 |
| NM_002033 | 1 | 0 | 1 | 0 | 1 | 1 |
| NM_002035 | 1 | 1 | 1 | 1 | 0 | 1 |
| NM_002036 | 1 | 0 | 1 | 0 | 0 | 0 |
| NM_002038 | 1 | 0 | 1 | 0 | 1 | 1 |
| NM_002039 | 1 | 0 | 1 | 0 | 0 | 1 |
| NM_002040 | 1 | 0 | 1 | 0 | 0 | 1 |
| NM_002041 | 1 | 0 | 1 | 0 | 0 | 0 |
| NM_002042 | 1 | 0 | 1 | 0 | 0 | 0 |
| NM_002043 | 1 | 1 | 1 | 0 | 1 | 0 |
| NM_002044 | 1 | 0 | 1 | 0 | 1 | 0 |
| NM_002045 | 1 | 0 | 1 | 0 | 0 | 1 |
| NM_002046 | 1 | 1 | 1 | 1 | 1 | 1 |
| NM_002047 | 1 | 1 | 1 | 1 | 0 | 1 |
| NM_002048 | 1 | 1 | 1 | 0 | 1 | 1 |
| NM_002049 | 1 | 1 | 1 | 1 | 0 | 0 |
| NM_002050 | 1 | 0 | 1 | 0 | 0 | 1 |
| NM_002051 | 1 | 1 | 1 | 1 | 1 | 1 |
| NM_002053 | 1 | 1 | 1 | 1 | 1 | 1 |
| NM_002055 | 1 | 0 | 1 | 1 | 0 | 0 |
| NM_002056 | 1 | 1 | 1 | 1 | 1 | 1 |
| NM_002060 | 1 | 0 | 1 | 1 | 0 | 1 |
| NM_002061 | 1 | 0 | 1 | 0 | 0 | 1 |
| NM_002064 | 1 | 0 | 1 | 0 | 1 | 1 |
| NM_002065 | 1 | 1 | 1 | 1 | 0 | 1 |
| NM_002066 | 1 | 1 | 1 | 1 | 1 | 0 |
| NM_002067 | 1 | 1 | 1 | 1 | 0 | 1 |
| NM_002068 | 1 | 1 | 1 | 1 | 1 | 1 |
| NM_002069 | 1 | 1 | 1 | 1 | 0 | 0 |
| NM_002070 | 1 | 1 | 1 | 0 | 0 | 1 |
| NM_002071 | 1 | 1 | 1 | 1 | 0 | 0 |
| NM_002072 | 1 | 0 | 1 | 1 | 0 | 1 |
| NM_002073 | 1 | 0 | 1 | 0 | 1 | 1 |
| NM_002074 | 1 | 0 | 1 | 0 | 0 | 1 |
| NM_002075 | 1 | 1 | 1 | 1 | 1 | 1 |
| NM_002076 | 1 | 0 | 1 | 0 | 0 | 1 |
| NM_002077 | 1 | 1 | 1 | 1 | 1 | 1 |
| NM_002078 | 1 | 0 | 1 | 0 | 1 | 1 |
| NM_002079 | 1 | 1 | 1 | 1 | 0 | 1 |
| NM_002080 | 1 | 1 | 1 | 1 | 0 | 1 |
| NM_002081 | 1 | 0 | 1 | 1 | 0 | 0 |
| NM_002082 | 1 | 1 | 1 | 1 | 0 | 0 |
| NM_002083 | 1 | 0 | 1 | 1 | 0 | 0 |
| NM_002084 | 1 | 1 | 1 | 1 | 0 | 0 |
| NM_002085 | 1 | 1 | 1 | 1 | 0 | 1 |
| NM_002086 | 1 | 0 | 1 | 0 | 0 | 0 |
| NM_002087 | 1 | 1 | 1 | 1 | 1 | 1 |

|           |   |   |   |   |   |   |
|-----------|---|---|---|---|---|---|
| NM_002088 | 1 | 0 | 1 | 0 | 0 | 0 |
| NM_002089 | 1 | 1 | 1 | 1 | 0 | 0 |
| NM_002090 | 1 | 0 | 1 | 0 | 0 | 0 |
| NM_002092 | 1 | 0 | 1 | 1 | 1 | 0 |
| NM_002093 | 1 | 0 | 1 | 1 | 0 | 0 |
| NM_002094 | 1 | 1 | 1 | 1 | 0 | 0 |
| NM_002095 | 1 | 0 | 1 | 0 | 0 | 1 |
| NM_002096 | 1 | 0 | 1 | 1 | 0 | 0 |
| NM_002097 | 1 | 1 | 1 | 1 | 0 | 1 |
| NM_002098 | 1 | 0 | 0 | 0 | 0 | 0 |
| NM_002100 | 0 | 0 | 0 | 0 | 0 | 1 |
| NM_002101 | 1 | 1 | 1 | 1 | 0 | 1 |
| NM_002102 | 1 | 0 | 1 | 0 | 0 | 0 |
| NM_002103 | 1 | 1 | 1 | 1 | 0 | 0 |
| NM_002104 | 1 | 0 | 1 | 0 | 0 | 1 |
| NM_002105 | 1 | 0 | 1 | 0 | 1 | 1 |
| NM_002106 | 1 | 0 | 1 | 1 | 1 | 1 |
| NM_002108 | 1 | 1 | 1 | 1 | 1 | 1 |
| NM_002109 | 1 | 1 | 1 | 1 | 0 | 0 |
| NM_002110 | 1 | 0 | 1 | 0 | 0 | 1 |
| NM_002111 | 1 | 1 | 1 | 1 | 0 | 0 |
| NM_002112 | 1 | 1 | 1 | 1 | 1 | 1 |
| NM_002113 | 1 | 0 | 1 | 0 | 0 | 0 |
| NM_002114 | 1 | 1 | 1 | 1 | 0 | 1 |
| NM_002115 | 1 | 1 | 1 | 1 | 1 | 1 |
| NM_002116 | 1 | 0 | 1 | 1 | 0 | 0 |
| NM_002117 | 1 | 0 | 1 | 0 | 0 | 0 |
| NM_002118 | 1 | 0 | 1 | 0 | 0 | 1 |
| NM_002119 | 1 | 0 | 1 | 1 | 0 | 0 |
| NM_002120 | 1 | 1 | 1 | 0 | 0 | 1 |
| NM_002121 | 1 | 1 | 1 | 1 | 0 | 0 |
| NM_002122 | 1 | 0 | 1 | 0 | 1 | 1 |
| NM_002123 | 1 | 0 | 1 | 0 | 0 | 0 |
| NM_002124 | 1 | 1 | 1 | 0 | 0 | 1 |
| NM_002125 | 1 | 0 | 1 | 0 | 0 | 0 |
| NM_002127 | 1 | 0 | 1 | 0 | 0 | 1 |
| NM_002128 | 1 | 0 | 1 | 0 | 1 | 1 |
| NM_002129 | 1 | 1 | 1 | 1 | 0 | 0 |
| NM_002130 | 1 | 0 | 1 | 1 | 0 | 0 |
| NM_002133 | 1 | 1 | 1 | 1 | 0 | 1 |
| NM_002134 | 1 | 0 | 1 | 0 | 0 | 0 |
| NM_002135 | 1 | 1 | 1 | 1 | 0 | 1 |
| NM_002136 | 1 | 1 | 1 | 1 | 0 | 0 |
| NM_002137 | 1 | 1 | 1 | 0 | 1 | 1 |
| NM_002138 | 1 | 0 | 1 | 0 | 0 | 0 |
| NM_002139 | 1 | 1 | 1 | 1 | 0 | 1 |
| NM_002140 | 1 | 0 | 1 | 1 | 0 | 0 |
| NM_002141 | 0 | 0 | 1 | 0 | 0 | 0 |
| NM_002142 | 1 | 1 | 1 | 0 | 0 | 0 |
| NM_002143 | 1 | 1 | 1 | 1 | 0 | 1 |
| NM_002144 | 1 | 0 | 1 | 0 | 0 | 1 |
| NM_002145 | 1 | 0 | 1 | 0 | 1 | 1 |

|           |   |   |   |   |   |   |
|-----------|---|---|---|---|---|---|
| NM_002146 | 1 | 0 | 1 | 0 | 0 | 0 |
| NM_002148 | 1 | 0 | 1 | 0 | 0 | 1 |
| NM_002149 | 1 | 0 | 1 | 0 | 0 | 1 |
| NM_002150 | 1 | 0 | 1 | 0 | 0 | 1 |
| NM_002152 | 1 | 0 | 1 | 0 | 0 | 1 |
| NM_002155 | 1 | 1 | 1 | 1 | 0 | 0 |
| NM_002156 | 1 | 0 | 1 | 1 | 0 | 1 |
| NM_002157 | 1 | 1 | 1 | 1 | 1 | 1 |
| NM_002158 | 0 | 0 | 0 | 0 | 0 | 1 |
| NM_002159 | 0 | 0 | 0 | 0 | 0 | 1 |
| NM_002160 | 0 | 0 | 1 | 0 | 0 | 1 |
| NM_002161 | 1 | 1 | 1 | 1 | 1 | 1 |
| NM_002162 | 1 | 1 | 1 | 1 | 0 | 1 |
| NM_002163 | 1 | 1 | 1 | 1 | 0 | 0 |
| NM_002164 | 1 | 1 | 1 | 1 | 1 | 1 |
| NM_002165 | 1 | 1 | 1 | 1 | 0 | 0 |
| NM_002166 | 1 | 1 | 1 | 1 | 0 | 0 |
| NM_002167 | 1 | 1 | 1 | 1 | 1 | 1 |
| NM_002168 | 1 | 1 | 1 | 1 | 1 | 1 |
| NM_002169 | 1 | 0 | 1 | 0 | 0 | 0 |
| NM_002173 | 0 | 0 | 0 | 0 | 0 | 1 |
| NM_002176 | 1 | 0 | 1 | 0 | 0 | 1 |
| NM_002177 | 0 | 1 | 0 | 1 | 0 | 0 |
| NM_002178 | 1 | 0 | 1 | 1 | 0 | 0 |
| NM_002180 | 1 | 0 | 1 | 0 | 0 | 0 |
| NM_002182 | 1 | 1 | 1 | 1 | 0 | 0 |
| NM_002183 | 1 | 1 | 1 | 1 | 0 | 0 |
| NM_002185 | 1 | 1 | 1 | 1 | 1 | 1 |
| NM_002186 | 1 | 0 | 1 | 0 | 0 | 0 |
| NM_002187 | 0 | 0 | 0 | 0 | 0 | 1 |
| NM_002188 | 1 | 0 | 1 | 0 | 0 | 0 |
| NM_002189 | 1 | 0 | 1 | 1 | 1 | 1 |
| NM_002191 | 1 | 0 | 1 | 0 | 0 | 1 |
| NM_002192 | 1 | 1 | 1 | 1 | 0 | 1 |
| NM_002193 | 1 | 1 | 1 | 1 | 0 | 1 |
| NM_002194 | 1 | 0 | 1 | 0 | 0 | 0 |
| NM_002196 | 1 | 0 | 1 | 0 | 0 | 0 |
| NM_002197 | 1 | 0 | 1 | 0 | 1 | 0 |
| NM_002198 | 1 | 1 | 1 | 1 | 0 | 0 |
| NM_002199 | 1 | 0 | 1 | 1 | 0 | 0 |
| NM_002200 | 1 | 0 | 1 | 0 | 0 | 1 |
| NM_002201 | 1 | 1 | 1 | 1 | 0 | 1 |
| NM_002202 | 0 | 0 | 1 | 0 | 0 | 0 |
| NM_002203 | 1 | 1 | 1 | 1 | 0 | 0 |
| NM_002204 | 1 | 1 | 1 | 0 | 0 | 0 |
| NM_002205 | 1 | 0 | 1 | 1 | 1 | 1 |
| NM_002206 | 1 | 1 | 1 | 1 | 0 | 0 |
| NM_002207 | 1 | 0 | 1 | 0 | 0 | 0 |
| NM_002208 | 1 | 1 | 1 | 1 | 0 | 0 |
| NM_002209 | 1 | 0 | 1 | 0 | 0 | 0 |
| NM_002210 | 1 | 0 | 1 | 1 | 0 | 0 |
| NM_002211 | 1 | 1 | 1 | 0 | 1 | 0 |

|           |   |   |   |   |   |   |
|-----------|---|---|---|---|---|---|
| NM_002213 | 1 | 0 | 1 | 0 | 0 | 0 |
| NM_002215 | 1 | 1 | 1 | 0 | 0 | 0 |
| NM_002217 | 1 | 0 | 1 | 0 | 1 | 1 |
| NM_002218 | 1 | 1 | 1 | 1 | 0 | 0 |
| NM_002219 | 1 | 1 | 1 | 1 | 0 | 1 |
| NM_002220 | 1 | 0 | 1 | 0 | 0 | 0 |
| NM_002221 | 1 | 1 | 1 | 1 | 0 | 0 |
| NM_002222 | 1 | 0 | 1 | 1 | 1 | 0 |
| NM_002223 | 1 | 0 | 1 | 0 | 0 | 0 |
| NM_002224 | 1 | 1 | 1 | 1 | 1 | 1 |
| NM_002225 | 1 | 0 | 1 | 1 | 0 | 1 |
| NM_002226 | 1 | 0 | 1 | 0 | 0 | 0 |
| NM_002227 | 1 | 0 | 1 | 0 | 0 | 0 |
| NM_002228 | 1 | 1 | 1 | 1 | 0 | 0 |
| NM_002229 | 1 | 0 | 1 | 1 | 1 | 1 |
| NM_002230 | 1 | 1 | 1 | 0 | 0 | 0 |
| NM_002231 | 1 | 0 | 1 | 1 | 0 | 1 |
| NM_002232 | 1 | 0 | 1 | 1 | 0 | 1 |
| NM_002234 | 1 | 1 | 1 | 1 | 1 | 1 |
| NM_002236 | 1 | 0 | 1 | 1 | 0 | 0 |
| NM_002237 | 1 | 1 | 1 | 1 | 0 | 1 |
| NM_002239 | 1 | 0 | 1 | 0 | 0 | 0 |
| NM_002241 | 1 | 0 | 1 | 0 | 0 | 0 |
| NM_002242 | 1 | 0 | 1 | 0 | 0 | 0 |
| NM_002243 | 1 | 1 | 1 | 1 | 1 | 1 |
| NM_002244 | 0 | 0 | 0 | 0 | 0 | 1 |
| NM_002245 | 1 | 0 | 1 | 0 | 1 | 0 |
| NM_002246 | 1 | 0 | 1 | 0 | 0 | 1 |
| NM_002247 | 1 | 1 | 1 | 1 | 0 | 0 |
| NM_002248 | 0 | 0 | 1 | 0 | 0 | 0 |
| NM_002250 | 1 | 1 | 1 | 1 | 0 | 1 |
| NM_002251 | 1 | 0 | 1 | 0 | 1 | 0 |
| NM_002252 | 1 | 0 | 0 | 0 | 0 | 0 |
| NM_002254 | 1 | 1 | 1 | 1 | 1 | 1 |
| NM_002255 | 1 | 1 | 1 | 1 | 1 | 1 |
| NM_002256 | 1 | 0 | 1 | 0 | 0 | 0 |
| NM_002257 | 1 | 1 | 1 | 0 | 0 | 0 |
| NM_002258 | 1 | 0 | 1 | 1 | 0 | 0 |
| NM_002259 | 1 | 0 | 1 | 0 | 1 | 1 |
| NM_002260 | 1 | 0 | 1 | 0 | 1 | 1 |
| NM_002261 | 1 | 0 | 1 | 0 | 1 | 0 |
| NM_002262 | 1 | 1 | 1 | 0 | 1 | 0 |
| NM_002263 | 1 | 1 | 1 | 0 | 1 | 1 |
| NM_002264 | 1 | 0 | 1 | 1 | 0 | 0 |
| NM_002265 | 1 | 1 | 1 | 1 | 0 | 1 |
| NM_002266 | 1 | 1 | 1 | 0 | 1 | 1 |
| NM_002267 | 1 | 0 | 1 | 0 | 0 | 1 |
| NM_002268 | 1 | 0 | 1 | 1 | 1 | 1 |
| NM_002269 | 1 | 0 | 1 | 0 | 0 | 0 |
| NM_002270 | 1 | 0 | 1 | 0 | 0 | 0 |
| NM_002271 | 1 | 0 | 1 | 1 | 1 | 1 |
| NM_002272 | 1 | 0 | 1 | 0 | 0 | 0 |



|           |   |   |   |   |   |   |
|-----------|---|---|---|---|---|---|
| NM_002273 | 1 | 0 | 1 | 0 | 0 | 0 |
| NM_002275 | 0 | 0 | 0 | 0 | 1 | 0 |
| NM_002276 | 1 | 0 | 1 | 0 | 0 | 0 |
| NM_002277 | 1 | 0 | 1 | 1 | 0 | 0 |
| NM_002278 | 1 | 0 | 1 | 0 | 0 | 0 |
| NM_002279 | 0 | 0 | 0 | 0 | 0 | 1 |
| NM_002280 | 1 | 0 | 1 | 1 | 0 | 0 |
| NM_002282 | 1 | 1 | 0 | 0 | 0 | 1 |
| NM_002283 | 0 | 0 | 0 | 1 | 0 | 0 |
| NM_002284 | 1 | 0 | 1 | 0 | 0 | 0 |
| NM_002285 | 1 | 0 | 1 | 0 | 0 | 1 |
| NM_002286 | 1 | 0 | 1 | 1 | 0 | 0 |
| NM_002288 | 1 | 0 | 1 | 1 | 0 | 0 |
| NM_002289 | 0 | 0 | 0 | 0 | 0 | 1 |
| NM_002290 | 1 | 1 | 1 | 1 | 1 | 0 |
| NM_002291 | 0 | 0 | 1 | 0 | 0 | 0 |
| NM_002292 | 1 | 1 | 1 | 1 | 1 | 1 |
| NM_002293 | 1 | 0 | 1 | 0 | 0 | 1 |
| NM_002294 | 1 | 1 | 1 | 1 | 0 | 0 |
| NM_002295 | 1 | 0 | 1 | 0 | 1 | 1 |
| NM_002296 | 1 | 1 | 1 | 1 | 0 | 0 |
| NM_002298 | 1 | 0 | 1 | 1 | 0 | 0 |
| NM_002299 | 1 | 0 | 1 | 1 | 0 | 0 |
| NM_002300 | 1 | 1 | 1 | 1 | 0 | 1 |
| NM_002301 | 1 | 0 | 1 | 0 | 0 | 1 |
| NM_002302 | 0 | 1 | 0 | 1 | 0 | 0 |
| NM_002303 | 1 | 1 | 1 | 1 | 0 | 1 |
| NM_002305 | 1 | 1 | 1 | 1 | 0 | 1 |
| NM_002306 | 1 | 1 | 1 | 1 | 1 | 1 |
| NM_002307 | 1 | 0 | 1 | 0 | 1 | 0 |
| NM_002308 | 1 | 0 | 1 | 0 | 1 | 1 |
| NM_002309 | 1 | 1 | 1 | 1 | 0 | 1 |
| NM_002311 | 1 | 0 | 1 | 0 | 0 | 0 |
| NM_002312 | 1 | 1 | 1 | 1 | 0 | 0 |
| NM_002313 | 1 | 1 | 1 | 1 | 1 | 1 |
| NM_002314 | 1 | 0 | 1 | 0 | 1 | 1 |
| NM_002316 | 1 | 0 | 1 | 0 | 0 | 0 |
| NM_002318 | 1 | 0 | 1 | 0 | 1 | 0 |
| NM_002319 | 1 | 0 | 1 | 0 | 0 | 0 |
| NM_002332 | 1 | 1 | 1 | 1 | 1 | 1 |
| NM_002333 | 1 | 0 | 1 | 1 | 0 | 0 |
| NM_002335 | 1 | 0 | 1 | 0 | 0 | 0 |
| NM_002336 | 1 | 1 | 1 | 1 | 0 | 0 |
| NM_002337 | 1 | 0 | 1 | 1 | 0 | 0 |
| NM_002338 | 1 | 0 | 1 | 0 | 0 | 0 |
| NM_002339 | 1 | 1 | 1 | 1 | 0 | 0 |
| NM_002340 | 1 | 1 | 1 | 1 | 0 | 0 |
| NM_002342 | 1 | 1 | 1 | 1 | 1 | 1 |
| NM_002343 | 1 | 1 | 1 | 1 | 0 | 1 |
| NM_002344 | 1 | 0 | 1 | 0 | 0 | 0 |
| NM_002345 | 1 | 0 | 1 | 0 | 0 | 1 |
| NM_002346 | 1 | 0 | 1 | 0 | 1 | 1 |

|           |   |   |   |   |   |   |
|-----------|---|---|---|---|---|---|
| NM_002347 | 0 | 0 | 0 | 0 | 0 | 1 |
| NM_002348 | 1 | 1 | 1 | 1 | 0 | 0 |
| NM_002349 | 1 | 0 | 1 | 0 | 1 | 1 |
| NM_002350 | 1 | 1 | 1 | 1 | 1 | 1 |
| NM_002351 | 1 | 0 | 1 | 1 | 1 | 1 |
| NM_002354 | 1 | 0 | 1 | 0 | 0 | 0 |
| NM_002355 | 1 | 1 | 1 | 1 | 0 | 1 |
| NM_002356 | 1 | 0 | 1 | 1 | 1 | 1 |
| NM_002357 | 1 | 0 | 1 | 0 | 1 | 1 |
| NM_002358 | 1 | 0 | 1 | 0 | 0 | 1 |
| NM_002359 | 1 | 0 | 1 | 1 | 1 | 1 |
| NM_002360 | 1 | 0 | 1 | 0 | 0 | 0 |
| NM_002362 | 1 | 0 | 1 | 0 | 0 | 0 |
| NM_002364 | 0 | 0 | 0 | 0 | 0 | 1 |
| NM_002365 | 0 | 0 | 1 | 1 | 0 | 0 |
| NM_002368 | 1 | 0 | 0 | 0 | 0 | 1 |
| NM_002369 | 0 | 0 | 0 | 0 | 0 | 1 |
| NM_002370 | 1 | 0 | 0 | 0 | 0 | 0 |
| NM_002371 | 1 | 1 | 1 | 1 | 1 | 1 |
| NM_002372 | 1 | 0 | 1 | 0 | 0 | 0 |
| NM_002373 | 1 | 0 | 1 | 0 | 0 | 1 |
| NM_002375 | 1 | 0 | 1 | 0 | 0 | 1 |
| NM_002376 | 1 | 0 | 1 | 0 | 0 | 0 |
| NM_002377 | 1 | 0 | 1 | 1 | 0 | 0 |
| NM_002380 | 1 | 0 | 1 | 0 | 0 | 0 |
| NM_002381 | 0 | 0 | 1 | 0 | 0 | 0 |
| NM_002382 | 1 | 0 | 1 | 0 | 0 | 0 |
| NM_002383 | 1 | 0 | 1 | 0 | 0 | 0 |
| NM_002385 | 1 | 0 | 1 | 1 | 1 | 0 |
| NM_002386 | 1 | 0 | 1 | 1 | 0 | 0 |
| NM_002387 | 1 | 0 | 1 | 0 | 0 | 0 |
| NM_002388 | 1 | 0 | 1 | 1 | 0 | 1 |
| NM_002390 | 1 | 0 | 1 | 0 | 0 | 0 |
| NM_002391 | 1 | 0 | 1 | 0 | 1 | 1 |
| NM_002392 | 1 | 1 | 1 | 1 | 0 | 0 |
| NM_002393 | 1 | 0 | 1 | 0 | 0 | 0 |
| NM_002394 | 1 | 1 | 1 | 0 | 0 | 1 |
| NM_002395 | 1 | 1 | 1 | 1 | 0 | 0 |
| NM_002396 | 1 | 0 | 1 | 0 | 0 | 1 |
| NM_002397 | 1 | 0 | 1 | 0 | 0 | 0 |
| NM_002398 | 1 | 0 | 1 | 0 | 0 | 1 |
| NM_002401 | 1 | 0 | 1 | 1 | 1 | 1 |
| NM_002402 | 1 | 1 | 1 | 1 | 0 | 0 |
| NM_002404 | 1 | 0 | 1 | 1 | 0 | 0 |
| NM_002405 | 1 | 1 | 1 | 1 | 0 | 1 |
| NM_002406 | 1 | 0 | 1 | 1 | 0 | 0 |
| NM_002408 | 1 | 0 | 1 | 0 | 0 | 0 |
| NM_002409 | 0 | 0 | 1 | 0 | 0 | 1 |
| NM_002410 | 1 | 0 | 1 | 0 | 0 | 0 |
| NM_002412 | 1 | 1 | 1 | 1 | 0 | 1 |
| NM_002413 | 1 | 1 | 1 | 1 | 1 | 1 |
| NM_002414 | 1 | 1 | 1 | 1 | 0 | 0 |

|           |   |   |   |   |   |   |
|-----------|---|---|---|---|---|---|
| NM_002415 | 1 | 0 | 1 | 0 | 0 | 0 |
| NM_002416 | 1 | 1 | 1 | 1 | 0 | 1 |
| NM_002417 | 1 | 1 | 1 | 0 | 1 | 1 |
| NM_002419 | 1 | 0 | 1 | 0 | 1 | 1 |
| NM_002421 | 1 | 0 | 1 | 0 | 0 | 0 |
| NM_002423 | 0 | 0 | 1 | 0 | 0 | 0 |
| NM_002424 | 1 | 0 | 1 | 0 | 0 | 0 |
| NM_002428 | 1 | 0 | 1 | 1 | 1 | 1 |
| NM_002429 | 1 | 1 | 1 | 1 | 0 | 0 |
| NM_002430 | 1 | 0 | 1 | 0 | 0 | 0 |
| NM_002431 | 1 | 1 | 1 | 1 | 1 | 1 |
| NM_002432 | 1 | 1 | 1 | 1 | 1 | 1 |
| NM_002433 | 1 | 0 | 0 | 0 | 0 | 0 |
| NM_002434 | 1 | 1 | 1 | 1 | 0 | 0 |
| NM_002435 | 1 | 1 | 1 | 1 | 1 | 1 |
| NM_002436 | 1 | 1 | 1 | 1 | 0 | 1 |
| NM_002437 | 1 | 1 | 1 | 1 | 1 | 1 |
| NM_002438 | 1 | 1 | 1 | 1 | 1 | 1 |
| NM_002439 | 1 | 0 | 1 | 1 | 0 | 0 |
| NM_002440 | 1 | 0 | 1 | 0 | 0 | 0 |
| NM_002442 | 1 | 0 | 1 | 0 | 0 | 1 |
| NM_002443 | 0 | 0 | 1 | 0 | 0 | 0 |
| NM_002444 | 1 | 0 | 1 | 1 | 0 | 1 |
| NM_002445 | 1 | 1 | 1 | 1 | 0 | 0 |
| NM_002446 | 1 | 0 | 1 | 1 | 0 | 0 |
| NM_002447 | 1 | 0 | 0 | 0 | 0 | 1 |
| NM_002450 | 1 | 0 | 1 | 0 | 0 | 1 |
| NM_002451 | 1 | 1 | 1 | 1 | 0 | 0 |
| NM_002452 | 1 | 1 | 1 | 1 | 0 | 0 |
| NM_002453 | 1 | 1 | 1 | 1 | 1 | 1 |
| NM_002454 | 1 | 0 | 1 | 1 | 0 | 0 |
| NM_002455 | 1 | 1 | 1 | 1 | 0 | 0 |
| NM_002456 | 1 | 0 | 1 | 1 | 0 | 0 |
| NM_002457 | 1 | 1 | 1 | 0 | 0 | 0 |
| NM_002460 | 1 | 0 | 1 | 1 | 0 | 0 |
| NM_002461 | 1 | 0 | 1 | 0 | 0 | 0 |
| NM_002462 | 1 | 0 | 1 | 0 | 0 | 0 |
| NM_002463 | 1 | 1 | 1 | 1 | 0 | 1 |
| NM_002465 | 0 | 1 | 0 | 1 | 0 | 0 |
| NM_002466 | 1 | 1 | 1 | 0 | 1 | 1 |
| NM_002467 | 1 | 1 | 1 | 1 | 0 | 1 |
| NM_002468 | 1 | 0 | 1 | 0 | 0 | 0 |
| NM_002470 | 1 | 1 | 1 | 1 | 1 | 1 |
| NM_002471 | 1 | 0 | 1 | 0 | 0 | 1 |
| NM_002472 | 1 | 0 | 1 | 0 | 0 | 0 |
| NM_002474 | 1 | 0 | 1 | 0 | 0 | 0 |
| NM_002475 | 1 | 1 | 1 | 1 | 1 | 1 |
| NM_002476 | 1 | 0 | 1 | 0 | 0 | 0 |
| NM_002477 | 1 | 0 | 1 | 0 | 0 | 1 |
| NM_002478 | 1 | 0 | 1 | 0 | 0 | 0 |
| NM_002479 | 1 | 0 | 1 | 0 | 1 | 0 |
| NM_002480 | 1 | 0 | 1 | 1 | 0 | 0 |

|           |   |   |   |   |   |   |
|-----------|---|---|---|---|---|---|
| NM_002481 | 1 | 1 | 1 | 1 | 0 | 0 |
| NM_002483 | 1 | 0 | 1 | 0 | 0 | 1 |
| NM_002484 | 1 | 1 | 1 | 1 | 0 | 0 |
| NM_002485 | 1 | 0 | 1 | 0 | 0 | 0 |
| NM_002486 | 1 | 0 | 1 | 1 | 0 | 1 |
| NM_002487 | 1 | 1 | 1 | 1 | 0 | 0 |
| NM_002488 | 1 | 1 | 1 | 1 | 0 | 0 |
| NM_002489 | 1 | 1 | 1 | 1 | 0 | 1 |
| NM_002490 | 1 | 1 | 1 | 1 | 0 | 1 |
| NM_002491 | 1 | 1 | 1 | 1 | 1 | 1 |
| NM_002492 | 1 | 1 | 1 | 1 | 0 | 1 |
| NM_002493 | 1 | 1 | 1 | 1 | 1 | 1 |
| NM_002494 | 1 | 0 | 1 | 0 | 0 | 1 |
| NM_002495 | 1 | 0 | 1 | 1 | 0 | 0 |
| NM_002496 | 1 | 1 | 1 | 1 | 0 | 0 |
| NM_002497 | 1 | 0 | 1 | 0 | 1 | 1 |
| NM_002499 | 1 | 1 | 1 | 1 | 0 | 1 |
| NM_002500 | 0 | 0 | 0 | 0 | 0 | 1 |
| NM_002501 | 1 | 0 | 1 | 0 | 0 | 1 |
| NM_002502 | 1 | 0 | 1 | 1 | 0 | 1 |
| NM_002503 | 1 | 0 | 1 | 0 | 0 | 1 |
| NM_002504 | 1 | 0 | 1 | 1 | 1 | 1 |
| NM_002507 | 1 | 0 | 0 | 0 | 0 | 1 |
| NM_002508 | 1 | 1 | 1 | 1 | 0 | 0 |
| NM_002509 | 0 | 0 | 0 | 0 | 0 | 1 |
| NM_002510 | 1 | 0 | 1 | 0 | 0 | 1 |
| NM_002512 | 1 | 1 | 1 | 1 | 0 | 0 |
| NM_002513 | 1 | 1 | 1 | 1 | 1 | 1 |
| NM_002514 | 1 | 1 | 1 | 1 | 0 | 1 |
| NM_002516 | 1 | 0 | 1 | 0 | 0 | 0 |
| NM_002517 | 1 | 0 | 1 | 0 | 0 | 0 |
| NM_002518 | 1 | 0 | 1 | 1 | 0 | 0 |
| NM_002519 | 1 | 1 | 1 | 1 | 0 | 0 |
| NM_002520 | 1 | 0 | 1 | 1 | 1 | 1 |
| NM_002522 | 1 | 1 | 1 | 1 | 0 | 1 |
| NM_002523 | 1 | 0 | 1 | 0 | 0 | 0 |
| NM_002524 | 1 | 1 | 1 | 0 | 1 | 1 |
| NM_002525 | 1 | 1 | 1 | 1 | 0 | 1 |
| NM_002526 | 1 | 1 | 1 | 1 | 1 | 1 |
| NM_002527 | 0 | 0 | 0 | 0 | 0 | 1 |
| NM_002528 | 1 | 1 | 1 | 0 | 0 | 0 |
| NM_002529 | 1 | 0 | 0 | 0 | 0 | 1 |
| NM_002530 | 0 | 0 | 0 | 0 | 0 | 1 |
| NM_002531 | 1 | 1 | 1 | 1 | 0 | 0 |
| NM_002532 | 1 | 1 | 1 | 1 | 0 | 1 |
| NM_002533 | 1 | 0 | 1 | 1 | 0 | 0 |
| NM_002534 | 1 | 0 | 1 | 0 | 1 | 1 |
| NM_002535 | 1 | 0 | 1 | 0 | 1 | 1 |
| NM_002538 | 1 | 0 | 1 | 0 | 0 | 1 |
| NM_002539 | 1 | 1 | 1 | 1 | 1 | 1 |
| NM_002540 | 1 | 1 | 1 | 1 | 0 | 1 |
| NM_002541 | 1 | 1 | 1 | 1 | 0 | 1 |

|           |   |   |   |   |   |   |
|-----------|---|---|---|---|---|---|
| NM_002542 | 1 | 0 | 1 | 0 | 0 | 0 |
| NM_002543 | 1 | 0 | 1 | 0 | 0 | 0 |
| NM_002544 | 1 | 0 | 1 | 0 | 1 | 1 |
| NM_002545 | 1 | 0 | 1 | 0 | 0 | 0 |
| NM_002546 | 0 | 1 | 0 | 0 | 0 | 0 |
| NM_002547 | 0 | 0 | 1 | 0 | 0 | 0 |
| NM_002548 | 1 | 0 | 0 | 0 | 0 | 0 |
| NM_002550 | 0 | 0 | 0 | 0 | 0 | 1 |
| NM_002551 | 1 | 0 | 1 | 0 | 0 | 0 |
| NM_002553 | 1 | 0 | 1 | 0 | 0 | 0 |
| NM_002555 | 1 | 0 | 1 | 0 | 0 | 1 |
| NM_002556 | 1 | 0 | 1 | 0 | 0 | 0 |
| NM_002557 | 1 | 1 | 1 | 1 | 1 | 1 |
| NM_002558 | 1 | 0 | 1 | 1 | 0 | 0 |
| NM_002561 | 1 | 1 | 1 | 1 | 1 | 1 |
| NM_002562 | 1 | 1 | 1 | 1 | 0 | 0 |
| NM_002563 | 1 | 1 | 1 | 1 | 0 | 1 |
| NM_002565 | 1 | 0 | 1 | 0 | 0 | 0 |
| NM_002566 | 1 | 1 | 1 | 1 | 0 | 0 |
| NM_002567 | 1 | 1 | 1 | 1 | 0 | 1 |
| NM_002568 | 1 | 0 | 1 | 0 | 1 | 1 |
| NM_002569 | 1 | 1 | 1 | 1 | 1 | 1 |
| NM_002570 | 1 | 0 | 1 | 0 | 0 | 1 |
| NM_002572 | 1 | 0 | 1 | 1 | 0 | 0 |
| NM_002573 | 1 | 0 | 1 | 0 | 0 | 0 |
| NM_002574 | 1 | 1 | 1 | 1 | 1 | 1 |
| NM_002575 | 1 | 1 | 1 | 1 | 1 | 1 |
| NM_002576 | 1 | 0 | 1 | 1 | 1 | 1 |
| NM_002577 | 1 | 1 | 1 | 1 | 0 | 1 |
| NM_002578 | 1 | 0 | 1 | 0 | 1 | 1 |
| NM_002579 | 0 | 0 | 1 | 0 | 0 | 0 |
| NM_002580 | 1 | 1 | 1 | 1 | 0 | 0 |
| NM_002581 | 1 | 0 | 1 | 0 | 0 | 0 |
| NM_002582 | 1 | 1 | 1 | 1 | 1 | 1 |
| NM_002583 | 1 | 0 | 1 | 0 | 0 | 1 |
| NM_002585 | 1 | 1 | 1 | 1 | 0 | 0 |
| NM_002586 | 1 | 0 | 1 | 0 | 0 | 0 |
| NM_002587 | 1 | 1 | 1 | 1 | 1 | 1 |
| NM_002588 | 1 | 1 | 1 | 1 | 0 | 1 |
| NM_002590 | 1 | 0 | 1 | 0 | 1 | 1 |
| NM_002592 | 1 | 0 | 1 | 0 | 0 | 1 |
| NM_002593 | 1 | 1 | 1 | 1 | 1 | 1 |
| NM_002594 | 1 | 0 | 0 | 0 | 0 | 1 |
| NM_002595 | 1 | 1 | 1 | 0 | 0 | 1 |
| NM_002598 | 1 | 0 | 1 | 1 | 0 | 1 |
| NM_002599 | 1 | 0 | 0 | 0 | 0 | 0 |
| NM_002600 | 1 | 1 | 1 | 1 | 0 | 0 |
| NM_002601 | 1 | 1 | 1 | 1 | 0 | 0 |
| NM_002602 | 1 | 1 | 1 | 1 | 0 | 0 |
| NM_002603 | 1 | 0 | 1 | 0 | 0 | 0 |
| NM_002604 | 1 | 0 | 1 | 0 | 0 | 0 |
| NM_002605 | 1 | 0 | 1 | 0 | 0 | 1 |

|           |   |   |   |   |   |   |
|-----------|---|---|---|---|---|---|
| NM_002606 | 1 | 1 | 1 | 1 | 0 | 0 |
| NM_002607 | 1 | 0 | 1 | 1 | 0 | 1 |
| NM_002608 | 1 | 0 | 1 | 0 | 0 | 1 |
| NM_002609 | 1 | 0 | 1 | 1 | 0 | 0 |
| NM_002610 | 1 | 1 | 1 | 1 | 0 | 0 |
| NM_002611 | 1 | 0 | 1 | 0 | 0 | 0 |
| NM_002612 | 1 | 1 | 1 | 1 | 1 | 1 |
| NM_002613 | 1 | 0 | 1 | 1 | 0 | 0 |
| NM_002614 | 1 | 1 | 1 | 1 | 1 | 0 |
| NM_002615 | 1 | 1 | 1 | 1 | 0 | 1 |
| NM_002616 | 1 | 1 | 1 | 1 | 1 | 0 |
| NM_002617 | 1 | 1 | 1 | 1 | 0 | 0 |
| NM_002618 | 1 | 0 | 1 | 0 | 1 | 1 |
| NM_002619 | 1 | 0 | 1 | 1 | 0 | 1 |
| NM_002620 | 1 | 0 | 1 | 1 | 0 | 1 |
| NM_002621 | 1 | 0 | 1 | 1 | 0 | 0 |
| NM_002622 | 1 | 0 | 1 | 0 | 0 | 0 |
| NM_002623 | 1 | 0 | 1 | 0 | 0 | 0 |
| NM_002624 | 1 | 0 | 1 | 1 | 0 | 1 |
| NM_002625 | 1 | 0 | 1 | 1 | 1 | 1 |
| NM_002626 | 1 | 1 | 1 | 1 | 0 | 0 |
| NM_002627 | 1 | 0 | 1 | 0 | 0 | 1 |
| NM_002628 | 1 | 1 | 1 | 0 | 1 | 1 |
| NM_002629 | 0 | 0 | 1 | 0 | 0 | 0 |
| NM_002630 | 1 | 0 | 0 | 0 | 0 | 1 |
| NM_002631 | 1 | 0 | 1 | 1 | 0 | 1 |
| NM_002632 | 0 | 0 | 1 | 1 | 0 | 0 |
| NM_002633 | 1 | 0 | 1 | 1 | 0 | 0 |
| NM_002634 | 1 | 1 | 1 | 1 | 0 | 0 |
| NM_002635 | 1 | 1 | 1 | 1 | 1 | 1 |
| NM_002636 | 1 | 1 | 1 | 1 | 0 | 0 |
| NM_002637 | 1 | 0 | 1 | 0 | 0 | 0 |
| NM_002638 | 1 | 1 | 1 | 1 | 1 | 1 |
| NM_002640 | 1 | 1 | 1 | 1 | 1 | 1 |
| NM_002641 | 1 | 1 | 1 | 1 | 0 | 0 |
| NM_002642 | 1 | 1 | 1 | 1 | 0 | 0 |
| NM_002643 | 1 | 0 | 1 | 0 | 0 | 0 |
| NM_002644 | 1 | 0 | 1 | 0 | 0 | 0 |
| NM_002645 | 1 | 0 | 1 | 0 | 0 | 1 |
| NM_002646 | 1 | 1 | 1 | 1 | 0 | 0 |
| NM_002647 | 1 | 1 | 1 | 1 | 0 | 0 |
| NM_002648 | 1 | 0 | 1 | 0 | 0 | 1 |
| NM_002649 | 1 | 1 | 1 | 1 | 0 | 0 |
| NM_002650 | 1 | 1 | 1 | 1 | 1 | 1 |
| NM_002651 | 1 | 0 | 1 | 0 | 0 | 0 |
| NM_002652 | 1 | 1 | 1 | 1 | 0 | 0 |
| NM_002653 | 1 | 0 | 1 | 0 | 1 | 0 |
| NM_002654 | 1 | 1 | 1 | 1 | 1 | 1 |
| NM_002655 | 1 | 1 | 1 | 1 | 0 | 0 |
| NM_002656 | 1 | 1 | 1 | 1 | 0 | 0 |
| NM_002657 | 1 | 1 | 1 | 1 | 1 | 1 |
| NM_002658 | 1 | 0 | 1 | 0 | 0 | 1 |

|           |   |   |   |   |   |   |
|-----------|---|---|---|---|---|---|
| NM_002659 | 1 | 1 | 1 | 1 | 0 | 1 |
| NM_002661 | 1 | 1 | 1 | 1 | 1 | 1 |
| NM_002662 | 1 | 1 | 1 | 1 | 0 | 1 |
| NM_002663 | 1 | 0 | 1 | 1 | 1 | 1 |
| NM_002664 | 1 | 1 | 1 | 1 | 1 | 1 |
| NM_002665 | 1 | 0 | 1 | 1 | 0 | 0 |
| NM_002666 | 1 | 0 | 1 | 0 | 0 | 0 |
| NM_002667 | 1 | 1 | 1 | 1 | 0 | 0 |
| NM_002668 | 1 | 0 | 1 | 0 | 0 | 1 |
| NM_002669 | 1 | 0 | 1 | 0 | 0 | 0 |
| NM_002670 | 1 | 0 | 1 | 0 | 0 | 0 |
| NM_002674 | 1 | 0 | 0 | 0 | 0 | 0 |
| NM_002676 | 1 | 1 | 1 | 1 | 0 | 0 |
| NM_002677 | 0 | 1 | 1 | 1 | 0 | 0 |
| NM_002679 | 1 | 0 | 1 | 0 | 0 | 0 |
| NM_002685 | 1 | 1 | 1 | 1 | 0 | 0 |
| NM_002686 | 1 | 0 | 0 | 0 | 0 | 1 |
| NM_002687 | 1 | 1 | 1 | 1 | 0 | 1 |
| NM_002688 | 1 | 0 | 1 | 0 | 0 | 0 |
| NM_002689 | 1 | 1 | 1 | 0 | 0 | 1 |
| NM_002690 | 1 | 1 | 1 | 1 | 0 | 0 |
| NM_002691 | 1 | 1 | 1 | 0 | 1 | 1 |
| NM_002692 | 1 | 1 | 1 | 0 | 0 | 0 |
| NM_002693 | 1 | 0 | 1 | 0 | 0 | 0 |
| NM_002694 | 1 | 0 | 1 | 0 | 0 | 0 |
| NM_002695 | 1 | 1 | 1 | 1 | 0 | 0 |
| NM_002696 | 1 | 0 | 1 | 0 | 0 | 0 |
| NM_002697 | 1 | 0 | 1 | 0 | 0 | 1 |
| NM_002698 | 1 | 1 | 1 | 1 | 0 | 1 |
| NM_002699 | 0 | 0 | 0 | 0 | 0 | 1 |
| NM_002701 | 1 | 0 | 1 | 0 | 0 | 0 |
| NM_002702 | 1 | 0 | 1 | 0 | 0 | 0 |
| NM_002703 | 1 | 0 | 1 | 1 | 1 | 1 |
| NM_002704 | 1 | 0 | 1 | 1 | 0 | 0 |
| NM_002705 | 1 | 0 | 1 | 1 | 0 | 1 |
| NM_002706 | 1 | 0 | 1 | 0 | 0 | 0 |
| NM_002707 | 1 | 0 | 1 | 0 | 0 | 1 |
| NM_002708 | 1 | 0 | 1 | 0 | 0 | 0 |
| NM_002709 | 1 | 0 | 1 | 1 | 0 | 1 |
| NM_002710 | 1 | 0 | 1 | 1 | 0 | 1 |
| NM_002712 | 1 | 1 | 1 | 1 | 0 | 1 |
| NM_002714 | 1 | 1 | 1 | 1 | 0 | 1 |
| NM_002715 | 1 | 0 | 1 | 0 | 0 | 0 |
| NM_002716 | 1 | 1 | 1 | 0 | 0 | 0 |
| NM_002717 | 1 | 0 | 1 | 0 | 1 | 1 |
| NM_002718 | 0 | 0 | 1 | 0 | 0 | 0 |
| NM_002719 | 1 | 0 | 1 | 0 | 1 | 1 |
| NM_002720 | 1 | 0 | 1 | 0 | 1 | 0 |
| NM_002721 | 1 | 0 | 1 | 0 | 0 | 0 |
| NM_002722 | 1 | 0 | 0 | 0 | 0 | 0 |
| NM_002723 | 1 | 0 | 1 | 0 | 0 | 0 |
| NM_002725 | 0 | 0 | 0 | 1 | 0 | 0 |

|           |   |   |   |   |   |   |
|-----------|---|---|---|---|---|---|
| NM_002726 | 1 | 0 | 1 | 1 | 1 | 1 |
| NM_002727 | 1 | 0 | 1 | 0 | 0 | 0 |
| NM_002728 | 1 | 0 | 0 | 0 | 0 | 1 |
| NM_002729 | 1 | 0 | 1 | 1 | 1 | 0 |
| NM_002730 | 1 | 0 | 1 | 0 | 1 | 1 |
| NM_002731 | 1 | 0 | 1 | 1 | 1 | 1 |
| NM_002732 | 1 | 1 | 1 | 1 | 0 | 0 |
| NM_002733 | 1 | 0 | 1 | 0 | 0 | 0 |
| NM_002734 | 1 | 1 | 1 | 1 | 0 | 0 |
| NM_002736 | 1 | 1 | 1 | 1 | 0 | 1 |
| NM_002737 | 1 | 1 | 1 | 0 | 0 | 0 |
| NM_002738 | 1 | 1 | 1 | 1 | 1 | 0 |
| NM_002739 | 1 | 0 | 1 | 0 | 0 | 0 |
| NM_002740 | 1 | 0 | 1 | 0 | 0 | 1 |
| NM_002741 | 1 | 0 | 1 | 1 | 0 | 0 |
| NM_002742 | 1 | 0 | 1 | 0 | 0 | 1 |
| NM_002743 | 1 | 0 | 1 | 0 | 0 | 0 |
| NM_002744 | 1 | 1 | 1 | 1 | 0 | 1 |
| NM_002745 | 1 | 1 | 1 | 1 | 0 | 1 |
| NM_002747 | 1 | 1 | 1 | 1 | 0 | 0 |
| NM_002748 | 1 | 0 | 1 | 0 | 0 | 1 |
| NM_002751 | 1 | 0 | 1 | 0 | 0 | 0 |
| NM_002752 | 1 | 0 | 1 | 1 | 0 | 1 |
| NM_002754 | 1 | 1 | 1 | 0 | 1 | 1 |
| NM_002755 | 1 | 0 | 1 | 1 | 0 | 1 |
| NM_002756 | 1 | 0 | 1 | 1 | 0 | 1 |
| NM_002759 | 1 | 0 | 1 | 1 | 0 | 0 |
| NM_002760 | 1 | 1 | 1 | 1 | 0 | 0 |
| NM_002761 | 0 | 0 | 0 | 0 | 0 | 1 |
| NM_002762 | 0 | 0 | 0 | 0 | 0 | 1 |
| NM_002763 | 1 | 0 | 0 | 1 | 1 | 0 |
| NM_002764 | 1 | 0 | 1 | 1 | 0 | 0 |
| NM_002765 | 1 | 1 | 1 | 1 | 0 | 1 |
| NM_002766 | 1 | 0 | 1 | 0 | 0 | 1 |
| NM_002767 | 1 | 0 | 1 | 1 | 0 | 0 |
| NM_002768 | 1 | 0 | 1 | 0 | 0 | 0 |
| NM_002769 | 1 | 0 | 1 | 0 | 0 | 0 |
| NM_002770 | 1 | 1 | 1 | 1 | 1 | 1 |
| NM_002771 | 1 | 0 | 1 | 1 | 0 | 1 |
| NM_002773 | 1 | 0 | 1 | 1 | 0 | 0 |
| NM_002774 | 1 | 0 | 1 | 0 | 0 | 0 |
| NM_002775 | 1 | 1 | 1 | 1 | 0 | 1 |
| NM_002776 | 0 | 0 | 0 | 0 | 0 | 1 |
| NM_002777 | 1 | 0 | 1 | 0 | 0 | 0 |
| NM_002778 | 1 | 1 | 1 | 1 | 0 | 0 |
| NM_002779 | 1 | 0 | 1 | 0 | 0 | 0 |
| NM_002780 | 1 | 0 | 1 | 1 | 0 | 0 |
| NM_002781 | 1 | 0 | 1 | 0 | 0 | 0 |
| NM_002782 | 0 | 0 | 1 | 0 | 0 | 0 |
| NM_002786 | 1 | 1 | 1 | 1 | 0 | 1 |
| NM_002787 | 1 | 0 | 1 | 0 | 1 | 1 |
| NM_002788 | 1 | 0 | 1 | 0 | 1 | 1 |



|           |   |   |   |   |   |   |
|-----------|---|---|---|---|---|---|
| NM_002789 | 1 | 0 | 1 | 0 | 1 | 1 |
| NM_002790 | 1 | 0 | 1 | 1 | 0 | 1 |
| NM_002791 | 1 | 1 | 1 | 1 | 1 | 1 |
| NM_002792 | 1 | 0 | 1 | 0 | 0 | 1 |
| NM_002793 | 1 | 0 | 1 | 0 | 0 | 0 |
| NM_002794 | 1 | 0 | 1 | 0 | 0 | 0 |
| NM_002795 | 1 | 0 | 1 | 1 | 1 | 0 |
| NM_002796 | 1 | 0 | 1 | 0 | 0 | 0 |
| NM_002797 | 1 | 1 | 1 | 1 | 0 | 0 |
| NM_002798 | 1 | 1 | 1 | 1 | 0 | 0 |
| NM_002799 | 1 | 0 | 1 | 0 | 0 | 0 |
| NM_002800 | 1 | 1 | 1 | 1 | 1 | 1 |
| NM_002801 | 1 | 0 | 1 | 0 | 1 | 1 |
| NM_002802 | 1 | 0 | 1 | 0 | 0 | 0 |
| NM_002803 | 1 | 0 | 1 | 0 | 0 | 1 |
| NM_002804 | 1 | 1 | 1 | 0 | 0 | 1 |
| NM_002805 | 1 | 1 | 1 | 1 | 0 | 1 |
| NM_002806 | 1 | 0 | 1 | 0 | 0 | 0 |
| NM_002807 | 1 | 1 | 1 | 1 | 0 | 1 |
| NM_002808 | 1 | 1 | 1 | 1 | 0 | 1 |
| NM_002809 | 1 | 1 | 1 | 1 | 0 | 0 |
| NM_002811 | 1 | 0 | 1 | 1 | 0 | 1 |
| NM_002812 | 1 | 1 | 1 | 1 | 0 | 0 |
| NM_002813 | 1 | 0 | 1 | 0 | 0 | 0 |
| NM_002815 | 1 | 1 | 1 | 1 | 0 | 0 |
| NM_002816 | 1 | 0 | 1 | 0 | 0 | 0 |
| NM_002817 | 1 | 0 | 1 | 0 | 0 | 0 |
| NM_002818 | 1 | 0 | 1 | 0 | 1 | 1 |
| NM_002819 | 1 | 1 | 1 | 1 | 1 | 1 |
| NM_002820 | 0 | 0 | 0 | 1 | 0 | 0 |
| NM_002821 | 1 | 0 | 1 | 1 | 0 | 1 |
| NM_002822 | 1 | 1 | 1 | 0 | 0 | 0 |
| NM_002824 | 1 | 0 | 1 | 0 | 0 | 0 |
| NM_002826 | 1 | 1 | 1 | 1 | 1 | 0 |
| NM_002827 | 1 | 0 | 1 | 0 | 0 | 1 |
| NM_002828 | 1 | 1 | 1 | 1 | 1 | 1 |
| NM_002829 | 1 | 0 | 1 | 0 | 0 | 0 |
| NM_002830 | 1 | 0 | 1 | 1 | 1 | 1 |
| NM_002831 | 1 | 0 | 1 | 0 | 1 | 1 |
| NM_002832 | 1 | 1 | 1 | 1 | 0 | 0 |
| NM_002833 | 1 | 1 | 1 | 1 | 0 | 0 |
| NM_002834 | 1 | 0 | 1 | 0 | 0 | 0 |
| NM_002835 | 1 | 0 | 1 | 1 | 0 | 1 |
| NM_002837 | 1 | 0 | 0 | 0 | 0 | 1 |
| NM_002838 | 1 | 0 | 1 | 1 | 0 | 0 |
| NM_002840 | 1 | 0 | 1 | 0 | 0 | 0 |
| NM_002841 | 1 | 0 | 1 | 0 | 0 | 0 |
| NM_002843 | 1 | 0 | 1 | 1 | 0 | 0 |
| NM_002844 | 1 | 1 | 1 | 1 | 1 | 1 |
| NM_002845 | 1 | 0 | 1 | 1 | 1 | 1 |
| NM_002846 | 1 | 0 | 1 | 0 | 0 | 1 |
| NM_002848 | 1 | 1 | 1 | 1 | 1 | 1 |

|           |   |   |   |   |   |   |
|-----------|---|---|---|---|---|---|
| NM_002849 | 1 | 1 | 1 | 0 | 0 | 1 |
| NM_002850 | 1 | 0 | 1 | 0 | 0 | 0 |
| NM_002851 | 0 | 0 | 0 | 0 | 0 | 1 |
| NM_002852 | 1 | 1 | 1 | 1 | 1 | 1 |
| NM_002853 | 1 | 0 | 1 | 0 | 0 | 1 |
| NM_002854 | 1 | 0 | 1 | 0 | 0 | 1 |
| NM_002856 | 1 | 0 | 1 | 0 | 0 | 1 |
| NM_002857 | 1 | 0 | 1 | 1 | 1 | 1 |
| NM_002858 | 1 | 0 | 1 | 0 | 1 | 1 |
| NM_002859 | 1 | 0 | 1 | 1 | 1 | 1 |
| NM_002860 | 1 | 0 | 1 | 1 | 0 | 1 |
| NM_002861 | 1 | 0 | 1 | 1 | 1 | 1 |
| NM_002862 | 1 | 1 | 1 | 1 | 0 | 1 |
| NM_002863 | 1 | 0 | 1 | 1 | 1 | 1 |
| NM_002864 | 1 | 0 | 1 | 0 | 0 | 0 |
| NM_002865 | 1 | 0 | 1 | 0 | 0 | 0 |
| NM_002866 | 1 | 1 | 1 | 0 | 0 | 1 |
| NM_002868 | 1 | 0 | 1 | 0 | 0 | 0 |
| NM_002869 | 1 | 0 | 1 | 0 | 1 | 0 |
| NM_002870 | 1 | 1 | 1 | 1 | 1 | 0 |
| NM_002871 | 1 | 1 | 1 | 1 | 0 | 0 |
| NM_002872 | 1 | 0 | 1 | 1 | 1 | 1 |
| NM_002873 | 1 | 0 | 1 | 1 | 1 | 1 |
| NM_002874 | 1 | 1 | 1 | 1 | 0 | 0 |
| NM_002875 | 1 | 0 | 1 | 0 | 0 | 0 |
| NM_002876 | 1 | 1 | 1 | 1 | 0 | 0 |
| NM_002877 | 1 | 1 | 1 | 1 | 0 | 0 |
| NM_002880 | 1 | 1 | 1 | 1 | 1 | 1 |
| NM_002881 | 1 | 1 | 1 | 1 | 1 | 1 |
| NM_002882 | 1 | 1 | 1 | 1 | 0 | 1 |
| NM_002883 | 1 | 0 | 1 | 0 | 0 | 0 |
| NM_002884 | 1 | 0 | 1 | 1 | 0 | 1 |
| NM_002886 | 1 | 0 | 0 | 0 | 0 | 1 |
| NM_002887 | 1 | 0 | 1 | 1 | 0 | 1 |
| NM_002888 | 1 | 0 | 0 | 1 | 0 | 0 |
| NM_002889 | 1 | 0 | 1 | 0 | 0 | 0 |
| NM_002890 | 1 | 0 | 1 | 0 | 0 | 1 |
| NM_002892 | 1 | 1 | 1 | 1 | 0 | 0 |
| NM_002893 | 1 | 0 | 1 | 1 | 0 | 1 |
| NM_002894 | 1 | 1 | 1 | 1 | 1 | 1 |
| NM_002895 | 1 | 0 | 1 | 0 | 0 | 1 |
| NM_002896 | 1 | 1 | 1 | 0 | 0 | 0 |
| NM_002898 | 1 | 0 | 1 | 0 | 0 | 0 |
| NM_002900 | 1 | 0 | 1 | 0 | 0 | 1 |
| NM_002901 | 1 | 1 | 1 | 1 | 0 | 1 |
| NM_002902 | 1 | 0 | 1 | 0 | 1 | 1 |
| NM_002903 | 1 | 0 | 1 | 0 | 0 | 0 |
| NM_002904 | 1 | 0 | 1 | 0 | 0 | 0 |
| NM_002905 | 1 | 0 | 1 | 1 | 1 | 0 |
| NM_002906 | 1 | 0 | 1 | 0 | 0 | 1 |
| NM_002907 | 1 | 0 | 1 | 0 | 0 | 0 |
| NM_002908 | 1 | 1 | 1 | 1 | 0 | 1 |

|           |   |   |   |   |   |   |
|-----------|---|---|---|---|---|---|
| NM_002909 | 1 | 0 | 1 | 0 | 0 | 0 |
| NM_002910 | 1 | 0 | 1 | 0 | 0 | 0 |
| NM_002911 | 1 | 0 | 1 | 0 | 0 | 1 |
| NM_002912 | 1 | 1 | 1 | 0 | 0 | 0 |
| NM_002913 | 1 | 0 | 1 | 1 | 1 | 1 |
| NM_002914 | 1 | 0 | 1 | 1 | 0 | 0 |
| NM_002915 | 1 | 1 | 1 | 0 | 1 | 1 |
| NM_002916 | 1 | 0 | 1 | 0 | 0 | 1 |
| NM_002918 | 1 | 1 | 1 | 1 | 0 | 1 |
| NM_002919 | 1 | 1 | 1 | 0 | 0 | 0 |
| NM_002920 | 0 | 0 | 1 | 0 | 0 | 0 |
| NM_002921 | 0 | 0 | 0 | 0 | 0 | 1 |
| NM_002922 | 1 | 1 | 1 | 1 | 0 | 0 |
| NM_002923 | 1 | 0 | 1 | 0 | 0 | 0 |
| NM_002924 | 1 | 1 | 1 | 1 | 0 | 0 |
| NM_002925 | 1 | 0 | 1 | 1 | 0 | 0 |
| NM_002926 | 1 | 1 | 0 | 0 | 0 | 1 |
| NM_002928 | 1 | 0 | 1 | 0 | 0 | 1 |
| NM_002929 | 1 | 1 | 1 | 1 | 0 | 0 |
| NM_002930 | 1 | 0 | 1 | 0 | 0 | 0 |
| NM_002931 | 1 | 0 | 1 | 1 | 0 | 1 |
| NM_002933 | 1 | 0 | 1 | 0 | 0 | 0 |
| NM_002934 | 1 | 1 | 1 | 1 | 1 | 1 |
| NM_002935 | 1 | 1 | 1 | 1 | 1 | 1 |
| NM_002936 | 1 | 1 | 1 | 1 | 0 | 1 |
| NM_002937 | 1 | 1 | 1 | 1 | 0 | 0 |
| NM_002938 | 1 | 0 | 1 | 0 | 0 | 0 |
| NM_002939 | 1 | 1 | 1 | 1 | 0 | 0 |
| NM_002940 | 1 | 0 | 1 | 1 | 1 | 0 |
| NM_002943 | 1 | 0 | 1 | 0 | 1 | 1 |
| NM_002945 | 1 | 0 | 1 | 0 | 1 | 1 |
| NM_002946 | 1 | 0 | 1 | 1 | 1 | 1 |
| NM_002947 | 1 | 0 | 1 | 0 | 0 | 0 |
| NM_002948 | 1 | 0 | 1 | 1 | 0 | 0 |
| NM_002949 | 1 | 1 | 1 | 1 | 1 | 1 |
| NM_002950 | 1 | 1 | 1 | 1 | 0 | 1 |
| NM_002951 | 1 | 1 | 1 | 1 | 0 | 1 |
| NM_002953 | 1 | 1 | 1 | 1 | 0 | 1 |
| NM_002954 | 1 | 0 | 1 | 0 | 0 | 1 |
| NM_002955 | 1 | 1 | 1 | 1 | 0 | 0 |
| NM_002956 | 1 | 0 | 1 | 0 | 0 | 0 |
| NM_002957 | 1 | 0 | 1 | 1 | 1 | 1 |
| NM_002958 | 1 | 1 | 1 | 1 | 0 | 0 |
| NM_002959 | 1 | 1 | 1 | 1 | 0 | 0 |
| NM_002960 | 1 | 0 | 1 | 0 | 0 | 0 |
| NM_002961 | 1 | 1 | 1 | 1 | 1 | 1 |
| NM_002962 | 1 | 0 | 1 | 0 | 0 | 1 |
| NM_002963 | 1 | 0 | 0 | 0 | 0 | 0 |
| NM_002964 | 1 | 1 | 1 | 0 | 0 | 0 |
| NM_002965 | 1 | 1 | 1 | 1 | 1 | 1 |
| NM_002966 | 1 | 1 | 1 | 1 | 0 | 0 |
| NM_002967 | 1 | 1 | 1 | 1 | 1 | 1 |

|           |   |   |   |   |   |   |
|-----------|---|---|---|---|---|---|
| NM_002968 | 0 | 0 | 0 | 0 | 0 | 1 |
| NM_002969 | 1 | 0 | 1 | 0 | 0 | 0 |
| NM_002970 | 1 | 1 | 1 | 1 | 1 | 1 |
| NM_002971 | 1 | 1 | 1 | 1 | 1 | 1 |
| NM_002973 | 1 | 1 | 1 | 1 | 0 | 0 |
| NM_002975 | 1 | 1 | 1 | 1 | 1 | 0 |
| NM_002977 | 1 | 0 | 1 | 0 | 0 | 0 |
| NM_002978 | 1 | 1 | 1 | 1 | 0 | 0 |
| NM_002979 | 1 | 0 | 1 | 0 | 1 | 0 |
| NM_002980 | 0 | 0 | 0 | 0 | 0 | 1 |
| NM_002981 | 1 | 1 | 1 | 1 | 0 | 1 |
| NM_002982 | 1 | 0 | 1 | 0 | 1 | 1 |
| NM_002983 | 1 | 1 | 1 | 1 | 1 | 0 |
| NM_002984 | 1 | 1 | 1 | 1 | 0 | 1 |
| NM_002985 | 1 | 0 | 1 | 1 | 1 | 1 |
| NM_002986 | 0 | 1 | 0 | 0 | 0 | 0 |
| NM_002987 | 1 | 1 | 1 | 1 | 0 | 0 |
| NM_002990 | 1 | 0 | 1 | 0 | 0 | 0 |
| NM_002991 | 1 | 0 | 1 | 0 | 0 | 0 |
| NM_002993 | 1 | 0 | 1 | 0 | 0 | 1 |
| NM_002994 | 1 | 0 | 1 | 0 | 0 | 0 |
| NM_002995 | 1 | 0 | 1 | 0 | 0 | 0 |
| NM_002998 | 1 | 1 | 1 | 1 | 1 | 1 |
| NM_002999 | 1 | 1 | 1 | 1 | 0 | 1 |
| NM_003000 | 1 | 0 | 1 | 0 | 1 | 1 |
| NM_003001 | 1 | 0 | 1 | 0 | 0 | 0 |
| NM_003002 | 1 | 0 | 1 | 0 | 0 | 0 |
| NM_003003 | 1 | 1 | 1 | 1 | 0 | 1 |
| NM_003004 | 1 | 0 | 1 | 1 | 1 | 1 |
| NM_003005 | 1 | 0 | 1 | 0 | 0 | 1 |
| NM_003006 | 1 | 0 | 1 | 1 | 0 | 1 |
| NM_003007 | 1 | 1 | 1 | 1 | 1 | 1 |
| NM_003008 | 1 | 1 | 1 | 1 | 0 | 0 |
| NM_003009 | 1 | 1 | 1 | 1 | 0 | 1 |
| NM_003010 | 1 | 1 | 1 | 1 | 0 | 1 |
| NM_003011 | 1 | 0 | 1 | 0 | 0 | 0 |
| NM_003012 | 0 | 0 | 0 | 0 | 0 | 1 |
| NM_003015 | 1 | 1 | 1 | 1 | 0 | 0 |
| NM_003016 | 1 | 1 | 1 | 1 | 0 | 0 |
| NM_003017 | 1 | 0 | 1 | 1 | 1 | 1 |
| NM_003018 | 0 | 1 | 0 | 0 | 0 | 0 |
| NM_003019 | 1 | 1 | 1 | 1 | 1 | 1 |
| NM_003020 | 1 | 0 | 1 | 0 | 0 | 1 |
| NM_003021 | 1 | 0 | 1 | 1 | 0 | 0 |
| NM_003022 | 1 | 1 | 1 | 1 | 0 | 1 |
| NM_003023 | 1 | 1 | 1 | 1 | 1 | 1 |
| NM_003024 | 0 | 0 | 0 | 0 | 0 | 1 |
| NM_003025 | 1 | 0 | 1 | 0 | 1 | 0 |
| NM_003027 | 0 | 0 | 0 | 0 | 0 | 1 |
| NM_003028 | 1 | 0 | 1 | 0 | 0 | 0 |
| NM_003029 | 1 | 1 | 1 | 1 | 1 | 1 |
| NM_003030 | 1 | 0 | 1 | 1 | 0 | 0 |

|           |   |   |   |   |   |   |
|-----------|---|---|---|---|---|---|
| NM_003031 | 1 | 0 | 1 | 1 | 0 | 0 |
| NM_003033 | 1 | 0 | 1 | 1 | 0 | 0 |
| NM_003034 | 1 | 1 | 1 | 1 | 0 | 0 |
| NM_003035 | 1 | 0 | 1 | 0 | 0 | 0 |
| NM_003036 | 1 | 1 | 1 | 1 | 0 | 0 |
| NM_003037 | 1 | 0 | 1 | 0 | 0 | 1 |
| NM_003038 | 1 | 1 | 1 | 1 | 1 | 1 |
| NM_003039 | 1 | 1 | 1 | 1 | 0 | 1 |
| NM_003040 | 1 | 0 | 1 | 0 | 0 | 0 |
| NM_003041 | 1 | 1 | 1 | 0 | 0 | 0 |
| NM_003042 | 1 | 0 | 1 | 0 | 0 | 0 |
| NM_003043 | 1 | 0 | 1 | 1 | 0 | 0 |
| NM_003044 | 1 | 0 | 1 | 1 | 0 | 0 |
| NM_003045 | 0 | 0 | 1 | 0 | 0 | 0 |
| NM_003046 | 1 | 0 | 0 | 0 | 0 | 1 |
| NM_003047 | 1 | 0 | 1 | 1 | 0 | 0 |
| NM_003049 | 1 | 0 | 1 | 0 | 0 | 1 |
| NM_003051 | 1 | 1 | 1 | 1 | 0 | 1 |
| NM_003052 | 1 | 0 | 1 | 1 | 0 | 0 |
| NM_003053 | 1 | 1 | 1 | 1 | 0 | 1 |
| NM_003054 | 1 | 0 | 1 | 0 | 0 | 1 |
| NM_003055 | 1 | 0 | 1 | 1 | 0 | 0 |
| NM_003056 | 1 | 0 | 1 | 1 | 1 | 1 |
| NM_003057 | 1 | 1 | 1 | 1 | 0 | 1 |
| NM_003059 | 1 | 1 | 1 | 1 | 1 | 1 |
| NM_003060 | 1 | 1 | 1 | 1 | 0 | 1 |
| NM_003061 | 1 | 1 | 1 | 0 | 0 | 1 |
| NM_003063 | 1 | 1 | 0 | 0 | 0 | 0 |
| NM_003064 | 1 | 0 | 1 | 1 | 1 | 1 |
| NM_003066 | 1 | 0 | 1 | 0 | 1 | 1 |
| NM_003070 | 1 | 0 | 1 | 1 | 0 | 1 |
| NM_003071 | 1 | 0 | 1 | 0 | 0 | 0 |
| NM_003072 | 1 | 1 | 1 | 1 | 0 | 0 |
| NM_003073 | 1 | 1 | 1 | 1 | 0 | 0 |
| NM_003074 | 1 | 0 | 1 | 1 | 1 | 0 |
| NM_003076 | 1 | 0 | 1 | 1 | 0 | 1 |
| NM_003077 | 1 | 0 | 1 | 0 | 0 | 1 |
| NM_003078 | 1 | 0 | 1 | 1 | 1 | 1 |
| NM_003079 | 1 | 0 | 1 | 0 | 0 | 0 |
| NM_003080 | 1 | 0 | 0 | 0 | 0 | 1 |
| NM_003082 | 1 | 0 | 1 | 0 | 1 | 0 |
| NM_003083 | 1 | 0 | 1 | 1 | 0 | 0 |
| NM_003084 | 1 | 0 | 1 | 0 | 0 | 1 |
| NM_003085 | 1 | 0 | 1 | 1 | 0 | 1 |
| NM_003086 | 1 | 1 | 1 | 1 | 0 | 0 |
| NM_003087 | 1 | 0 | 1 | 0 | 0 | 1 |
| NM_003088 | 1 | 0 | 1 | 0 | 0 | 1 |
| NM_003089 | 1 | 0 | 1 | 0 | 0 | 1 |
| NM_003090 | 1 | 1 | 1 | 1 | 1 | 1 |
| NM_003091 | 1 | 1 | 1 | 1 | 0 | 1 |
| NM_003092 | 1 | 0 | 1 | 1 | 0 | 0 |
| NM_003093 | 1 | 0 | 1 | 1 | 0 | 1 |

|           |   |   |   |   |   |   |
|-----------|---|---|---|---|---|---|
| NM_003094 | 1 | 1 | 1 | 1 | 0 | 0 |
| NM_003095 | 1 | 1 | 1 | 1 | 0 | 1 |
| NM_003096 | 1 | 0 | 1 | 0 | 0 | 0 |
| NM_003097 | 1 | 1 | 1 | 1 | 1 | 1 |
| NM_003098 | 1 | 0 | 1 | 0 | 0 | 0 |
| NM_003100 | 1 | 1 | 1 | 1 | 0 | 1 |
| NM_003101 | 1 | 1 | 1 | 1 | 0 | 0 |
| NM_003102 | 0 | 0 | 0 | 0 | 0 | 1 |
| NM_003104 | 1 | 1 | 1 | 1 | 1 | 0 |
| NM_003105 | 1 | 1 | 1 | 1 | 0 | 1 |
| NM_003106 | 1 | 0 | 1 | 0 | 0 | 1 |
| NM_003107 | 1 | 1 | 1 | 1 | 0 | 0 |
| NM_003110 | 1 | 0 | 1 | 0 | 0 | 1 |
| NM_003112 | 1 | 0 | 1 | 0 | 0 | 0 |
| NM_003113 | 1 | 1 | 1 | 1 | 0 | 0 |
| NM_003114 | 1 | 1 | 1 | 1 | 0 | 1 |
| NM_003115 | 1 | 0 | 1 | 0 | 1 | 0 |
| NM_003117 | 1 | 0 | 1 | 0 | 0 | 0 |
| NM_003118 | 1 | 0 | 1 | 1 | 0 | 1 |
| NM_003119 | 1 | 0 | 1 | 1 | 0 | 0 |
| NM_003120 | 1 | 1 | 1 | 1 | 1 | 1 |
| NM_003121 | 1 | 1 | 1 | 1 | 1 | 0 |
| NM_003122 | 1 | 0 | 1 | 0 | 1 | 0 |
| NM_003123 | 1 | 1 | 1 | 1 | 0 | 1 |
| NM_003124 | 1 | 0 | 1 | 1 | 0 | 0 |
| NM_003125 | 1 | 0 | 1 | 1 | 0 | 0 |
| NM_003126 | 1 | 0 | 1 | 0 | 0 | 0 |
| NM_003127 | 1 | 0 | 1 | 0 | 0 | 0 |
| NM_003128 | 1 | 1 | 1 | 1 | 0 | 1 |
| NM_003129 | 1 | 1 | 1 | 1 | 1 | 1 |
| NM_003130 | 1 | 0 | 1 | 0 | 1 | 1 |
| NM_003131 | 1 | 1 | 1 | 1 | 1 | 0 |
| NM_003132 | 1 | 1 | 0 | 0 | 0 | 1 |
| NM_003133 | 1 | 0 | 1 | 0 | 0 | 0 |
| NM_003134 | 1 | 0 | 1 | 0 | 0 | 0 |
| NM_003135 | 1 | 0 | 1 | 0 | 0 | 0 |
| NM_003136 | 1 | 0 | 1 | 0 | 0 | 0 |
| NM_003137 | 1 | 1 | 1 | 1 | 1 | 1 |
| NM_003138 | 1 | 1 | 1 | 1 | 0 | 0 |
| NM_003139 | 1 | 0 | 1 | 0 | 1 | 1 |
| NM_003140 | 1 | 0 | 1 | 1 | 1 | 1 |
| NM_003141 | 1 | 1 | 1 | 1 | 1 | 1 |
| NM_003142 | 1 | 1 | 1 | 1 | 0 | 1 |
| NM_003143 | 1 | 1 | 1 | 1 | 0 | 1 |
| NM_003144 | 1 | 1 | 1 | 1 | 0 | 0 |
| NM_003145 | 0 | 1 | 0 | 0 | 0 | 0 |
| NM_003146 | 1 | 0 | 1 | 1 | 0 | 1 |
| NM_003149 | 1 | 0 | 0 | 0 | 0 | 0 |
| NM_003150 | 1 | 1 | 1 | 1 | 1 | 1 |
| NM_003151 | 1 | 1 | 1 | 1 | 1 | 1 |
| NM_003152 | 1 | 0 | 1 | 0 | 1 | 1 |
| NM_003153 | 1 | 1 | 1 | 1 | 0 | 0 |

|           |   |   |   |   |   |   |
|-----------|---|---|---|---|---|---|
| NM_003154 | 1 | 0 | 1 | 0 | 0 | 0 |
| NM_003156 | 1 | 0 | 1 | 0 | 0 | 0 |
| NM_003157 | 1 | 0 | 1 | 1 | 0 | 1 |
| NM_003158 | 1 | 0 | 1 | 0 | 0 | 1 |
| NM_003159 | 1 | 0 | 1 | 1 | 0 | 0 |
| NM_003160 | 1 | 0 | 1 | 0 | 0 | 0 |
| NM_003161 | 1 | 0 | 1 | 1 | 0 | 1 |
| NM_003162 | 1 | 0 | 1 | 0 | 0 | 0 |
| NM_003164 | 1 | 0 | 1 | 1 | 0 | 0 |
| NM_003165 | 1 | 0 | 1 | 1 | 0 | 0 |
| NM_003166 | 1 | 1 | 1 | 1 | 1 | 1 |
| NM_003167 | 0 | 1 | 0 | 1 | 0 | 0 |
| NM_003168 | 1 | 1 | 1 | 1 | 1 | 1 |
| NM_003169 | 1 | 0 | 1 | 0 | 0 | 0 |
| NM_003170 | 1 | 0 | 1 | 0 | 0 | 0 |
| NM_003171 | 1 | 1 | 1 | 1 | 0 | 0 |
| NM_003172 | 1 | 0 | 1 | 0 | 0 | 1 |
| NM_003173 | 1 | 0 | 1 | 0 | 0 | 0 |
| NM_003174 | 1 | 0 | 1 | 1 | 1 | 1 |
| NM_003175 | 1 | 0 | 1 | 1 | 0 | 0 |
| NM_003176 | 0 | 0 | 1 | 1 | 0 | 0 |
| NM_003177 | 1 | 0 | 1 | 0 | 1 | 1 |
| NM_003179 | 1 | 0 | 1 | 1 | 0 | 0 |
| NM_003180 | 1 | 0 | 1 | 1 | 1 | 1 |
| NM_003181 | 1 | 0 | 0 | 0 | 0 | 1 |
| NM_003183 | 1 | 0 | 1 | 0 | 1 | 1 |
| NM_003184 | 1 | 0 | 1 | 0 | 0 | 0 |
| NM_003185 | 1 | 0 | 1 | 0 | 0 | 0 |
| NM_003186 | 1 | 1 | 1 | 1 | 0 | 1 |
| NM_003187 | 1 | 1 | 1 | 1 | 0 | 1 |
| NM_003189 | 1 | 0 | 1 | 1 | 0 | 0 |
| NM_003190 | 0 | 0 | 1 | 0 | 0 | 0 |
| NM_003191 | 1 | 0 | 1 | 0 | 0 | 0 |
| NM_003192 | 1 | 0 | 1 | 1 | 0 | 0 |
| NM_003193 | 1 | 1 | 1 | 1 | 0 | 1 |
| NM_003194 | 1 | 0 | 1 | 1 | 1 | 1 |
| NM_003195 | 1 | 1 | 1 | 1 | 0 | 0 |
| NM_003198 | 1 | 1 | 1 | 1 | 0 | 0 |
| NM_003199 | 1 | 1 | 1 | 1 | 1 | 1 |
| NM_003200 | 1 | 1 | 1 | 1 | 0 | 0 |
| NM_003201 | 1 | 0 | 1 | 0 | 0 | 1 |
| NM_003202 | 1 | 1 | 1 | 1 | 0 | 1 |
| NM_003203 | 1 | 1 | 1 | 1 | 1 | 1 |
| NM_003204 | 1 | 0 | 1 | 0 | 0 | 1 |
| NM_003205 | 1 | 0 | 1 | 0 | 1 | 1 |
| NM_003206 | 0 | 0 | 0 | 0 | 0 | 1 |
| NM_003211 | 1 | 0 | 1 | 0 | 0 | 1 |
| NM_003212 | 0 | 0 | 0 | 0 | 0 | 1 |
| NM_003213 | 0 | 0 | 1 | 0 | 0 | 0 |
| NM_003215 | 1 | 1 | 1 | 1 | 0 | 0 |
| NM_003217 | 1 | 0 | 1 | 1 | 0 | 0 |
| NM_003218 | 1 | 0 | 1 | 1 | 0 | 0 |

|           |   |   |   |   |   |   |
|-----------|---|---|---|---|---|---|
| NM_003219 | 1 | 0 | 1 | 0 | 0 | 0 |
| NM_003220 | 1 | 0 | 1 | 0 | 0 | 0 |
| NM_003221 | 0 | 0 | 0 | 0 | 0 | 1 |
| NM_003222 | 1 | 0 | 1 | 0 | 0 | 0 |
| NM_003223 | 1 | 1 | 1 | 1 | 0 | 0 |
| NM_003224 | 1 | 1 | 1 | 0 | 0 | 0 |
| NM_003225 | 0 | 0 | 1 | 0 | 0 | 0 |
| NM_003226 | 1 | 1 | 1 | 1 | 1 | 1 |
| NM_003227 | 1 | 1 | 1 | 1 | 0 | 0 |
| NM_003234 | 1 | 1 | 1 | 1 | 0 | 1 |
| NM_003235 | 1 | 0 | 0 | 0 | 0 | 1 |
| NM_003236 | 1 | 1 | 1 | 1 | 1 | 1 |
| NM_003239 | 1 | 0 | 1 | 0 | 1 | 1 |
| NM_003240 | 1 | 0 | 0 | 0 | 0 | 0 |
| NM_003241 | 1 | 1 | 1 | 1 | 0 | 0 |
| NM_003242 | 1 | 0 | 1 | 1 | 1 | 0 |
| NM_003243 | 1 | 1 | 1 | 1 | 1 | 0 |
| NM_003244 | 1 | 0 | 1 | 1 | 1 | 1 |
| NM_003245 | 1 | 1 | 1 | 1 | 0 | 0 |
| NM_003246 | 1 | 1 | 1 | 1 | 0 | 1 |
| NM_003248 | 1 | 1 | 1 | 1 | 1 | 1 |
| NM_003249 | 1 | 1 | 1 | 1 | 0 | 1 |
| NM_003250 | 1 | 0 | 1 | 0 | 1 | 0 |
| NM_003251 | 1 | 0 | 1 | 1 | 0 | 1 |
| NM_003253 | 1 | 1 | 1 | 1 | 0 | 1 |
| NM_003254 | 1 | 1 | 1 | 1 | 0 | 1 |
| NM_003255 | 1 | 0 | 1 | 1 | 0 | 0 |
| NM_003258 | 1 | 0 | 1 | 0 | 1 | 1 |
| NM_003259 | 1 | 0 | 1 | 0 | 0 | 1 |
| NM_003260 | 1 | 1 | 1 | 1 | 0 | 0 |
| NM_003262 | 1 | 1 | 1 | 1 | 0 | 1 |
| NM_003263 | 1 | 0 | 1 | 1 | 0 | 0 |
| NM_003264 | 1 | 1 | 1 | 1 | 1 | 1 |
| NM_003265 | 1 | 1 | 1 | 1 | 0 | 1 |
| NM_003268 | 1 | 0 | 1 | 0 | 0 | 0 |
| NM_003270 | 0 | 0 | 1 | 0 | 0 | 0 |
| NM_003271 | 1 | 1 | 1 | 1 | 0 | 0 |
| NM_003272 | 1 | 0 | 1 | 0 | 1 | 1 |
| NM_003273 | 1 | 1 | 1 | 1 | 0 | 1 |
| NM_003274 | 1 | 0 | 1 | 0 | 1 | 0 |
| NM_003275 | 1 | 0 | 1 | 0 | 1 | 1 |
| NM_003276 | 1 | 0 | 1 | 0 | 0 | 1 |
| NM_003277 | 1 | 0 | 1 | 0 | 0 | 1 |
| NM_003279 | 1 | 0 | 1 | 1 | 1 | 1 |
| NM_003280 | 1 | 1 | 1 | 1 | 1 | 1 |
| NM_003281 | 0 | 1 | 0 | 0 | 0 | 1 |
| NM_003282 | 1 | 1 | 1 | 1 | 0 | 1 |
| NM_003283 | 1 | 1 | 1 | 1 | 1 | 1 |
| NM_003286 | 1 | 0 | 1 | 1 | 1 | 1 |
| NM_003287 | 1 | 1 | 1 | 0 | 0 | 0 |
| NM_003288 | 1 | 1 | 1 | 1 | 1 | 0 |
| NM_003289 | 1 | 1 | 1 | 1 | 1 | 0 |



|           |   |   |   |   |   |   |
|-----------|---|---|---|---|---|---|
| NM_003290 | 1 | 0 | 1 | 0 | 0 | 1 |
| NM_003291 | 1 | 1 | 1 | 1 | 0 | 0 |
| NM_003292 | 1 | 1 | 1 | 0 | 0 | 0 |
| NM_003293 | 1 | 0 | 1 | 1 | 0 | 0 |
| NM_003294 | 1 | 0 | 1 | 0 | 0 | 0 |
| NM_003296 | 1 | 0 | 1 | 0 | 0 | 0 |
| NM_003297 | 1 | 0 | 1 | 1 | 0 | 0 |
| NM_003298 | 1 | 0 | 1 | 0 | 0 | 1 |
| NM_003299 | 1 | 1 | 1 | 0 | 0 | 1 |
| NM_003300 | 1 | 1 | 1 | 1 | 1 | 1 |
| NM_003302 | 1 | 0 | 1 | 0 | 0 | 0 |
| NM_003303 | 1 | 0 | 1 | 0 | 0 | 1 |
| NM_003304 | 1 | 0 | 1 | 1 | 0 | 0 |
| NM_003305 | 1 | 0 | 1 | 0 | 0 | 0 |
| NM_003307 | 1 | 0 | 1 | 1 | 1 | 0 |
| NM_003308 | 1 | 0 | 1 | 1 | 0 | 0 |
| NM_003310 | 1 | 1 | 1 | 1 | 0 | 1 |
| NM_003311 | 1 | 1 | 1 | 1 | 1 | 1 |
| NM_003312 | 1 | 0 | 1 | 1 | 0 | 0 |
| NM_003313 | 1 | 1 | 1 | 0 | 0 | 0 |
| NM_003314 | 1 | 1 | 1 | 1 | 0 | 0 |
| NM_003315 | 1 | 1 | 1 | 0 | 0 | 0 |
| NM_003316 | 1 | 0 | 1 | 1 | 1 | 1 |
| NM_003317 | 0 | 1 | 0 | 0 | 0 | 0 |
| NM_003318 | 1 | 0 | 1 | 0 | 0 | 1 |
| NM_003319 | 1 | 1 | 1 | 1 | 0 | 1 |
| NM_003321 | 1 | 0 | 1 | 0 | 0 | 0 |
| NM_003322 | 1 | 1 | 1 | 1 | 0 | 0 |
| NM_003323 | 1 | 0 | 1 | 0 | 0 | 0 |
| NM_003324 | 1 | 0 | 1 | 0 | 0 | 1 |
| NM_003325 | 1 | 0 | 1 | 0 | 0 | 0 |
| NM_003326 | 1 | 1 | 1 | 1 | 1 | 1 |
| NM_003327 | 1 | 0 | 1 | 1 | 0 | 1 |
| NM_003328 | 1 | 1 | 1 | 1 | 1 | 1 |
| NM_003329 | 1 | 1 | 1 | 1 | 1 | 1 |
| NM_003330 | 1 | 1 | 1 | 1 | 1 | 1 |
| NM_003331 | 1 | 0 | 1 | 1 | 0 | 1 |
| NM_003332 | 1 | 0 | 1 | 1 | 1 | 1 |
| NM_003333 | 1 | 0 | 1 | 0 | 1 | 0 |
| NM_003335 | 1 | 0 | 1 | 0 | 0 | 0 |
| NM_003336 | 1 | 1 | 1 | 1 | 1 | 1 |
| NM_003337 | 1 | 1 | 1 | 1 | 0 | 1 |
| NM_003338 | 1 | 1 | 1 | 1 | 1 | 1 |
| NM_003340 | 0 | 0 | 0 | 0 | 1 | 1 |
| NM_003343 | 1 | 0 | 1 | 0 | 0 | 0 |
| NM_003344 | 1 | 0 | 1 | 0 | 0 | 0 |
| NM_003345 | 1 | 0 | 1 | 0 | 0 | 1 |
| NM_003347 | 1 | 0 | 1 | 0 | 0 | 0 |
| NM_003348 | 1 | 0 | 1 | 0 | 0 | 0 |
| NM_003350 | 1 | 0 | 1 | 0 | 1 | 1 |
| NM_003352 | 1 | 1 | 1 | 1 | 0 | 0 |
| NM_003353 | 1 | 1 | 1 | 1 | 0 | 1 |

|           |   |   |   |   |   |   |
|-----------|---|---|---|---|---|---|
| NM_003355 | 1 | 1 | 1 | 1 | 0 | 0 |
| NM_003356 | 1 | 1 | 1 | 1 | 0 | 1 |
| NM_003357 | 1 | 0 | 0 | 0 | 0 | 1 |
| NM_003358 | 1 | 1 | 1 | 1 | 0 | 1 |
| NM_003359 | 1 | 1 | 1 | 1 | 0 | 0 |
| NM_003360 | 1 | 0 | 1 | 0 | 0 | 0 |
| NM_003361 | 1 | 1 | 1 | 1 | 0 | 0 |
| NM_003362 | 1 | 1 | 1 | 1 | 0 | 1 |
| NM_003363 | 1 | 1 | 1 | 1 | 0 | 1 |
| NM_003364 | 1 | 0 | 1 | 0 | 1 | 1 |
| NM_003365 | 1 | 1 | 1 | 1 | 0 | 1 |
| NM_003366 | 1 | 1 | 1 | 1 | 0 | 1 |
| NM_003367 | 1 | 0 | 1 | 0 | 0 | 0 |
| NM_003368 | 1 | 0 | 1 | 0 | 0 | 1 |
| NM_003369 | 1 | 0 | 1 | 1 | 0 | 0 |
| NM_003370 | 1 | 0 | 1 | 1 | 1 | 1 |
| NM_003371 | 1 | 0 | 1 | 1 | 0 | 0 |
| NM_003372 | 1 | 0 | 1 | 0 | 0 | 0 |
| NM_003373 | 1 | 0 | 1 | 0 | 0 | 1 |
| NM_003374 | 1 | 1 | 1 | 1 | 0 | 1 |
| NM_003375 | 1 | 0 | 1 | 0 | 1 | 0 |
| NM_003376 | 1 | 0 | 1 | 0 | 1 | 0 |
| NM_003377 | 1 | 1 | 1 | 1 | 1 | 1 |
| NM_003378 | 1 | 0 | 1 | 0 | 0 | 0 |
| NM_003379 | 1 | 0 | 1 | 1 | 0 | 1 |
| NM_003380 | 1 | 0 | 1 | 0 | 0 | 1 |
| NM_003381 | 1 | 0 | 1 | 0 | 0 | 0 |
| NM_003382 | 1 | 1 | 1 | 1 | 1 | 1 |
| NM_003383 | 1 | 1 | 1 | 1 | 0 | 1 |
| NM_003384 | 1 | 0 | 1 | 0 | 0 | 1 |
| NM_003387 | 1 | 1 | 1 | 1 | 1 | 1 |
| NM_003390 | 1 | 1 | 1 | 1 | 0 | 0 |
| NM_003393 | 1 | 0 | 1 | 0 | 0 | 0 |
| NM_003394 | 1 | 0 | 1 | 0 | 0 | 0 |
| NM_003396 | 1 | 0 | 0 | 0 | 0 | 0 |
| NM_003399 | 1 | 0 | 1 | 0 | 0 | 1 |
| NM_003400 | 1 | 1 | 1 | 1 | 1 | 1 |
| NM_003401 | 1 | 0 | 1 | 0 | 0 | 0 |
| NM_003403 | 1 | 1 | 1 | 1 | 0 | 1 |
| NM_003404 | 1 | 0 | 1 | 1 | 1 | 0 |
| NM_003405 | 1 | 0 | 1 | 0 | 0 | 1 |
| NM_003406 | 1 | 0 | 1 | 1 | 0 | 1 |
| NM_003407 | 1 | 0 | 1 | 0 | 1 | 1 |
| NM_003408 | 1 | 0 | 1 | 0 | 0 | 1 |
| NM_003409 | 1 | 0 | 1 | 0 | 0 | 0 |
| NM_003410 | 1 | 0 | 1 | 1 | 0 | 0 |
| NM_003411 | 1 | 0 | 1 | 1 | 0 | 0 |
| NM_003412 | 0 | 0 | 1 | 0 | 0 | 0 |
| NM_003413 | 1 | 1 | 1 | 1 | 0 | 0 |
| NM_003414 | 1 | 1 | 1 | 1 | 0 | 0 |
| NM_003415 | 1 | 0 | 1 | 1 | 0 | 0 |
| NM_003416 | 1 | 0 | 1 | 1 | 0 | 0 |

|           |   |   |   |   |   |   |
|-----------|---|---|---|---|---|---|
| NM_003417 | 1 | 0 | 1 | 0 | 0 | 0 |
| NM_003418 | 1 | 0 | 1 | 0 | 0 | 0 |
| NM_003419 | 1 | 1 | 1 | 1 | 1 | 1 |
| NM_003420 | 1 | 0 | 1 | 0 | 0 | 0 |
| NM_003422 | 1 | 0 | 1 | 0 | 0 | 0 |
| NM_003423 | 1 | 0 | 1 | 0 | 0 | 0 |
| NM_003425 | 1 | 1 | 1 | 1 | 0 | 0 |
| NM_003426 | 1 | 0 | 1 | 1 | 1 | 1 |
| NM_003427 | 1 | 0 | 1 | 1 | 0 | 0 |
| NM_003428 | 1 | 0 | 1 | 1 | 0 | 0 |
| NM_003429 | 1 | 0 | 1 | 1 | 0 | 0 |
| NM_003430 | 1 | 0 | 1 | 1 | 0 | 0 |
| NM_003431 | 1 | 0 | 1 | 0 | 0 | 1 |
| NM_003433 | 1 | 0 | 1 | 0 | 0 | 0 |
| NM_003434 | 1 | 0 | 1 | 1 | 1 | 1 |
| NM_003435 | 1 | 0 | 1 | 1 | 1 | 1 |
| NM_003436 | 1 | 0 | 1 | 1 | 0 | 0 |
| NM_003437 | 1 | 0 | 1 | 0 | 0 | 0 |
| NM_003440 | 1 | 1 | 1 | 1 | 1 | 1 |
| NM_003441 | 1 | 0 | 1 | 1 | 0 | 0 |
| NM_003442 | 1 | 0 | 1 | 0 | 0 | 0 |
| NM_003443 | 1 | 0 | 1 | 0 | 0 | 1 |
| NM_003445 | 1 | 0 | 1 | 0 | 0 | 1 |
| NM_003447 | 1 | 0 | 1 | 1 | 1 | 1 |
| NM_003449 | 1 | 0 | 1 | 0 | 0 | 0 |
| NM_003450 | 1 | 1 | 1 | 1 | 0 | 0 |
| NM_003451 | 1 | 1 | 1 | 1 | 1 | 1 |
| NM_003452 | 1 | 0 | 1 | 1 | 1 | 0 |
| NM_003453 | 1 | 0 | 1 | 0 | 0 | 0 |
| NM_003454 | 1 | 1 | 1 | 1 | 0 | 0 |
| NM_003455 | 1 | 1 | 1 | 1 | 0 | 0 |
| NM_003456 | 1 | 0 | 1 | 0 | 0 | 1 |
| NM_003457 | 1 | 1 | 1 | 1 | 1 | 1 |
| NM_003458 | 1 | 0 | 1 | 0 | 1 | 1 |
| NM_003459 | 1 | 1 | 1 | 1 | 0 | 0 |
| NM_003461 | 1 | 0 | 1 | 1 | 0 | 0 |
| NM_003462 | 1 | 0 | 1 | 0 | 0 | 1 |
| NM_003463 | 1 | 1 | 1 | 1 | 0 | 1 |
| NM_003465 | 1 | 0 | 1 | 1 | 0 | 0 |
| NM_003467 | 1 | 1 | 1 | 1 | 0 | 1 |
| NM_003468 | 1 | 0 | 1 | 0 | 1 | 1 |
| NM_003469 | 0 | 0 | 0 | 0 | 0 | 1 |
| NM_003470 | 1 | 1 | 1 | 0 | 0 | 1 |
| NM_003471 | 0 | 0 | 1 | 1 | 0 | 0 |
| NM_003472 | 1 | 0 | 1 | 0 | 0 | 1 |
| NM_003473 | 1 | 0 | 1 | 0 | 0 | 1 |
| NM_003474 | 1 | 1 | 1 | 0 | 0 | 0 |
| NM_003475 | 1 | 1 | 1 | 1 | 0 | 0 |
| NM_003476 | 1 | 0 | 0 | 0 | 0 | 1 |
| NM_003477 | 1 | 0 | 1 | 1 | 0 | 1 |
| NM_003478 | 1 | 0 | 1 | 1 | 0 | 1 |
| NM_003479 | 0 | 0 | 1 | 0 | 0 | 0 |

|           |   |   |   |   |   |   |
|-----------|---|---|---|---|---|---|
| NM_003480 | 0 | 1 | 0 | 0 | 1 | 0 |
| NM_003481 | 1 | 1 | 1 | 1 | 0 | 1 |
| NM_003482 | 1 | 0 | 1 | 0 | 0 | 1 |
| NM_003483 | 1 | 0 | 0 | 0 | 0 | 1 |
| NM_003485 | 1 | 1 | 1 | 1 | 1 | 0 |
| NM_003486 | 1 | 0 | 1 | 0 | 0 | 0 |
| NM_003488 | 1 | 1 | 1 | 1 | 0 | 1 |
| NM_003489 | 1 | 0 | 1 | 0 | 0 | 1 |
| NM_003491 | 1 | 0 | 1 | 0 | 0 | 1 |
| NM_003492 | 1 | 1 | 1 | 1 | 0 | 1 |
| NM_003493 | 1 | 1 | 1 | 1 | 1 | 1 |
| NM_003494 | 1 | 1 | 1 | 1 | 1 | 1 |
| NM_003495 | 1 | 1 | 1 | 1 | 0 | 1 |
| NM_003496 | 1 | 0 | 1 | 1 | 1 | 1 |
| NM_003498 | 1 | 1 | 1 | 1 | 0 | 1 |
| NM_003500 | 1 | 1 | 1 | 1 | 0 | 0 |
| NM_003501 | 1 | 1 | 1 | 1 | 0 | 0 |
| NM_003503 | 1 | 0 | 1 | 0 | 0 | 1 |
| NM_003504 | 1 | 0 | 1 | 0 | 0 | 0 |
| NM_003505 | 1 | 0 | 1 | 1 | 0 | 0 |
| NM_003506 | 1 | 0 | 1 | 1 | 0 | 0 |
| NM_003507 | 1 | 0 | 1 | 0 | 0 | 1 |
| NM_003508 | 1 | 0 | 1 | 0 | 0 | 1 |
| NM_003509 | 1 | 0 | 1 | 0 | 0 | 0 |
| NM_003510 | 1 | 1 | 1 | 1 | 1 | 1 |
| NM_003511 | 1 | 0 | 1 | 1 | 0 | 1 |
| NM_003512 | 1 | 1 | 1 | 1 | 0 | 0 |
| NM_003514 | 1 | 0 | 1 | 0 | 0 | 1 |
| NM_003516 | 1 | 0 | 1 | 1 | 1 | 1 |
| NM_003517 | 1 | 1 | 1 | 1 | 1 | 1 |
| NM_003518 | 1 | 1 | 1 | 0 | 0 | 0 |
| NM_003519 | 1 | 1 | 1 | 1 | 1 | 1 |
| NM_003520 | 1 | 1 | 1 | 1 | 0 | 1 |
| NM_003521 | 1 | 1 | 1 | 1 | 0 | 1 |
| NM_003522 | 1 | 1 | 1 | 0 | 0 | 0 |
| NM_003523 | 1 | 1 | 1 | 1 | 0 | 1 |
| NM_003524 | 1 | 0 | 1 | 1 | 0 | 1 |
| NM_003525 | 0 | 0 | 0 | 0 | 0 | 1 |
| NM_003526 | 1 | 0 | 1 | 0 | 0 | 0 |
| NM_003527 | 1 | 1 | 1 | 1 | 0 | 1 |
| NM_003528 | 1 | 1 | 1 | 1 | 0 | 1 |
| NM_003529 | 1 | 1 | 1 | 1 | 0 | 0 |
| NM_003530 | 1 | 1 | 1 | 1 | 0 | 0 |
| NM_003531 | 1 | 0 | 0 | 0 | 0 | 1 |
| NM_003533 | 1 | 0 | 0 | 0 | 0 | 1 |
| NM_003534 | 1 | 1 | 1 | 1 | 1 | 1 |
| NM_003535 | 1 | 0 | 1 | 1 | 1 | 0 |
| NM_003536 | 1 | 0 | 1 | 0 | 0 | 1 |
| NM_003538 | 1 | 1 | 1 | 0 | 0 | 0 |
| NM_003539 | 1 | 1 | 1 | 1 | 0 | 0 |
| NM_003540 | 1 | 1 | 1 | 1 | 0 | 0 |
| NM_003541 | 1 | 1 | 1 | 1 | 0 | 1 |

|           |   |   |   |   |   |   |
|-----------|---|---|---|---|---|---|
| NM_003542 | 1 | 0 | 1 | 0 | 0 | 0 |
| NM_003543 | 1 | 1 | 1 | 1 | 0 | 0 |
| NM_003544 | 1 | 0 | 1 | 1 | 0 | 1 |
| NM_003545 | 1 | 0 | 1 | 0 | 1 | 1 |
| NM_003546 | 0 | 0 | 1 | 0 | 0 | 1 |
| NM_003547 | 0 | 0 | 1 | 0 | 0 | 0 |
| NM_003548 | 1 | 0 | 0 | 0 | 0 | 1 |
| NM_003549 | 1 | 1 | 1 | 1 | 0 | 0 |
| NM_003550 | 1 | 0 | 1 | 0 | 0 | 1 |
| NM_003551 | 0 | 1 | 0 | 0 | 0 | 0 |
| NM_003553 | 1 | 0 | 1 | 0 | 0 | 0 |
| NM_003554 | 1 | 0 | 1 | 0 | 0 | 0 |
| NM_003555 | 1 | 0 | 0 | 0 | 0 | 1 |
| NM_003557 | 1 | 0 | 1 | 0 | 0 | 0 |
| NM_003558 | 1 | 0 | 1 | 0 | 1 | 1 |
| NM_003559 | 1 | 0 | 1 | 0 | 0 | 1 |
| NM_003560 | 1 | 0 | 1 | 0 | 1 | 1 |
| NM_003561 | 0 | 0 | 1 | 0 | 0 | 1 |
| NM_003562 | 1 | 0 | 1 | 0 | 0 | 0 |
| NM_003563 | 1 | 1 | 1 | 1 | 0 | 0 |
| NM_003564 | 1 | 1 | 1 | 1 | 0 | 1 |
| NM_003565 | 1 | 0 | 1 | 1 | 0 | 1 |
| NM_003566 | 1 | 0 | 1 | 0 | 0 | 0 |
| NM_003567 | 1 | 1 | 1 | 1 | 0 | 1 |
| NM_003568 | 1 | 0 | 1 | 0 | 1 | 1 |
| NM_003569 | 1 | 1 | 1 | 1 | 0 | 0 |
| NM_003570 | 1 | 0 | 1 | 0 | 0 | 1 |
| NM_003571 | 1 | 0 | 1 | 0 | 0 | 0 |
| NM_003573 | 1 | 0 | 1 | 1 | 0 | 0 |
| NM_003574 | 1 | 1 | 1 | 1 | 1 | 1 |
| NM_003575 | 1 | 0 | 1 | 0 | 0 | 1 |
| NM_003576 | 1 | 1 | 1 | 1 | 0 | 1 |
| NM_003577 | 1 | 0 | 1 | 0 | 0 | 1 |
| NM_003578 | 1 | 0 | 1 | 0 | 0 | 1 |
| NM_003579 | 1 | 0 | 1 | 0 | 1 | 1 |
| NM_003580 | 1 | 0 | 1 | 1 | 0 | 0 |
| NM_003581 | 1 | 0 | 1 | 1 | 0 | 0 |
| NM_003582 | 0 | 1 | 1 | 1 | 0 | 0 |
| NM_003584 | 1 | 0 | 1 | 0 | 0 | 0 |
| NM_003585 | 1 | 0 | 1 | 0 | 0 | 0 |
| NM_003586 | 1 | 0 | 1 | 0 | 0 | 0 |
| NM_003587 | 1 | 0 | 1 | 1 | 0 | 0 |
| NM_003588 | 1 | 0 | 1 | 0 | 1 | 1 |
| NM_003589 | 1 | 0 | 1 | 1 | 0 | 0 |
| NM_003590 | 1 | 0 | 1 | 0 | 1 | 1 |
| NM_003591 | 1 | 0 | 1 | 1 | 0 | 0 |
| NM_003592 | 1 | 1 | 1 | 1 | 0 | 0 |
| NM_003593 | 1 | 0 | 1 | 1 | 0 | 0 |
| NM_003594 | 1 | 1 | 1 | 1 | 0 | 1 |
| NM_003595 | 1 | 1 | 1 | 1 | 0 | 1 |
| NM_003596 | 1 | 1 | 1 | 1 | 0 | 1 |
| NM_003597 | 1 | 1 | 1 | 0 | 0 | 1 |

|           |   |   |   |   |   |   |
|-----------|---|---|---|---|---|---|
| NM_003598 | 1 | 0 | 1 | 1 | 0 | 0 |
| NM_003599 | 1 | 0 | 1 | 1 | 1 | 1 |
| NM_003600 | 1 | 0 | 1 | 0 | 1 | 1 |
| NM_003601 | 1 | 0 | 1 | 1 | 0 | 0 |
| NM_003602 | 1 | 1 | 1 | 1 | 0 | 0 |
| NM_003603 | 1 | 0 | 1 | 0 | 0 | 0 |
| NM_003605 | 1 | 0 | 1 | 1 | 1 | 1 |
| NM_003607 | 1 | 1 | 1 | 1 | 0 | 1 |
| NM_003608 | 1 | 0 | 1 | 0 | 1 | 1 |
| NM_003609 | 1 | 0 | 1 | 1 | 0 | 0 |
| NM_003610 | 1 | 0 | 1 | 0 | 0 | 1 |
| NM_003611 | 1 | 1 | 1 | 1 | 0 | 0 |
| NM_003612 | 1 | 0 | 1 | 0 | 0 | 0 |
| NM_003613 | 1 | 0 | 0 | 0 | 0 | 1 |
| NM_003614 | 1 | 0 | 1 | 0 | 0 | 1 |
| NM_003615 | 1 | 1 | 1 | 1 | 0 | 0 |
| NM_003616 | 1 | 1 | 1 | 1 | 1 | 1 |
| NM_003617 | 1 | 1 | 1 | 0 | 0 | 0 |
| NM_003618 | 1 | 0 | 1 | 0 | 0 | 0 |
| NM_003620 | 1 | 0 | 1 | 1 | 0 | 1 |
| NM_003622 | 1 | 0 | 1 | 0 | 0 | 0 |
| NM_003624 | 1 | 0 | 1 | 1 | 0 | 0 |
| NM_003626 | 1 | 1 | 1 | 1 | 0 | 1 |
| NM_003627 | 1 | 1 | 1 | 1 | 0 | 1 |
| NM_003628 | 1 | 1 | 1 | 1 | 0 | 1 |
| NM_003630 | 1 | 0 | 1 | 1 | 0 | 0 |
| NM_003631 | 1 | 0 | 1 | 0 | 0 | 0 |
| NM_003632 | 1 | 0 | 1 | 0 | 0 | 0 |
| NM_003633 | 1 | 0 | 1 | 0 | 0 | 1 |
| NM_003634 | 1 | 1 | 1 | 1 | 1 | 1 |
| NM_003635 | 1 | 0 | 1 | 1 | 0 | 0 |
| NM_003636 | 1 | 0 | 1 | 0 | 0 | 0 |
| NM_003637 | 1 | 0 | 1 | 0 | 0 | 1 |
| NM_003639 | 1 | 0 | 1 | 1 | 0 | 0 |
| NM_003640 | 1 | 0 | 1 | 0 | 1 | 1 |
| NM_003641 | 1 | 1 | 1 | 0 | 1 | 1 |
| NM_003642 | 1 | 0 | 1 | 1 | 0 | 1 |
| NM_003644 | 1 | 1 | 1 | 1 | 0 | 0 |
| NM_003645 | 1 | 1 | 1 | 0 | 0 | 1 |
| NM_003646 | 1 | 0 | 1 | 0 | 0 | 0 |
| NM_003647 | 1 | 0 | 1 | 0 | 0 | 0 |
| NM_003648 | 1 | 1 | 1 | 1 | 1 | 1 |
| NM_003650 | 1 | 1 | 1 | 1 | 1 | 1 |
| NM_003651 | 1 | 1 | 1 | 1 | 0 | 0 |
| NM_003652 | 1 | 1 | 1 | 1 | 0 | 1 |
| NM_003653 | 1 | 0 | 1 | 0 | 0 | 0 |
| NM_003654 | 1 | 0 | 0 | 0 | 0 | 0 |
| NM_003655 | 1 | 0 | 1 | 1 | 0 | 0 |
| NM_003656 | 1 | 1 | 1 | 1 | 0 | 0 |
| NM_003657 | 1 | 0 | 1 | 0 | 0 | 0 |
| NM_003658 | 1 | 0 | 1 | 0 | 0 | 1 |
| NM_003659 | 1 | 1 | 1 | 1 | 0 | 0 |

|           |   |   |   |   |   |   |
|-----------|---|---|---|---|---|---|
| NM_003660 | 1 | 0 | 1 | 0 | 0 | 1 |
| NM_003661 | 1 | 1 | 1 | 1 | 1 | 1 |
| NM_003663 | 1 | 0 | 1 | 0 | 0 | 0 |
| NM_003664 | 1 | 0 | 1 | 0 | 0 | 0 |
| NM_003665 | 1 | 1 | 1 | 1 | 0 | 0 |
| NM_003666 | 1 | 1 | 1 | 1 | 0 | 0 |
| NM_003668 | 1 | 1 | 1 | 1 | 0 | 1 |
| NM_003669 | 1 | 0 | 1 | 0 | 0 | 1 |
| NM_003670 | 1 | 1 | 1 | 1 | 1 | 1 |
| NM_003671 | 1 | 0 | 1 | 0 | 0 | 0 |
| NM_003672 | 1 | 1 | 1 | 1 | 0 | 1 |
| NM_003673 | 1 | 0 | 1 | 1 | 1 | 1 |
| NM_003674 | 1 | 0 | 1 | 1 | 0 | 0 |
| NM_003675 | 1 | 0 | 1 | 0 | 0 | 0 |
| NM_003676 | 1 | 1 | 1 | 1 | 0 | 0 |
| NM_003677 | 1 | 0 | 1 | 0 | 0 | 0 |
| NM_003678 | 1 | 0 | 1 | 1 | 0 | 0 |
| NM_003679 | 1 | 0 | 1 | 0 | 0 | 1 |
| NM_003680 | 1 | 1 | 1 | 1 | 0 | 1 |
| NM_003681 | 1 | 0 | 1 | 0 | 0 | 1 |
| NM_003682 | 1 | 0 | 1 | 1 | 1 | 0 |
| NM_003683 | 1 | 1 | 1 | 1 | 0 | 0 |
| NM_003684 | 1 | 1 | 1 | 1 | 1 | 1 |
| NM_003685 | 1 | 0 | 1 | 1 | 0 | 0 |
| NM_003688 | 1 | 0 | 1 | 1 | 0 | 0 |
| NM_003689 | 1 | 0 | 1 | 0 | 1 | 1 |
| NM_003690 | 1 | 0 | 1 | 0 | 0 | 0 |
| NM_003691 | 1 | 0 | 1 | 0 | 0 | 0 |
| NM_003692 | 1 | 0 | 1 | 0 | 0 | 0 |
| NM_003693 | 1 | 1 | 1 | 1 | 1 | 1 |
| NM_003696 | 1 | 0 | 0 | 0 | 0 | 0 |
| NM_003701 | 1 | 1 | 1 | 1 | 0 | 0 |
| NM_003702 | 1 | 0 | 0 | 0 | 0 | 0 |
| NM_003704 | 1 | 0 | 1 | 0 | 0 | 1 |
| NM_003705 | 1 | 0 | 1 | 1 | 0 | 1 |
| NM_003706 | 1 | 0 | 1 | 0 | 0 | 0 |
| NM_003707 | 1 | 0 | 1 | 0 | 0 | 0 |
| NM_003708 | 1 | 0 | 0 | 0 | 0 | 1 |
| NM_003709 | 1 | 1 | 1 | 1 | 1 | 1 |
| NM_003710 | 1 | 1 | 1 | 1 | 0 | 0 |
| NM_003711 | 1 | 0 | 1 | 0 | 0 | 1 |
| NM_003712 | 1 | 0 | 1 | 0 | 0 | 1 |
| NM_003713 | 1 | 0 | 1 | 1 | 0 | 1 |
| NM_003715 | 1 | 0 | 1 | 0 | 0 | 0 |
| NM_003716 | 1 | 1 | 1 | 1 | 0 | 1 |
| NM_003717 | 1 | 1 | 1 | 0 | 1 | 1 |
| NM_003718 | 1 | 0 | 1 | 0 | 0 | 1 |
| NM_003719 | 1 | 0 | 1 | 0 | 0 | 0 |
| NM_003720 | 1 | 0 | 1 | 1 | 0 | 0 |
| NM_003721 | 1 | 0 | 1 | 0 | 0 | 0 |
| NM_003722 | 1 | 1 | 1 | 0 | 1 | 1 |
| NM_003724 | 1 | 0 | 0 | 0 | 0 | 0 |

|           |   |   |   |   |   |   |
|-----------|---|---|---|---|---|---|
| NM_003725 | 1 | 0 | 1 | 0 | 0 | 1 |
| NM_003726 | 1 | 1 | 1 | 1 | 1 | 1 |
| NM_003728 | 0 | 1 | 0 | 0 | 0 | 0 |
| NM_003729 | 1 | 0 | 1 | 1 | 0 | 0 |
| NM_003730 | 1 | 0 | 1 | 0 | 0 | 1 |
| NM_003731 | 1 | 0 | 1 | 0 | 0 | 0 |
| NM_003732 | 1 | 0 | 1 | 0 | 0 | 0 |
| NM_003733 | 1 | 1 | 1 | 1 | 1 | 1 |
| NM_003734 | 1 | 0 | 1 | 1 | 0 | 1 |
| NM_003735 | 1 | 1 | 1 | 1 | 1 | 0 |
| NM_003736 | 1 | 1 | 1 | 1 | 1 | 0 |
| NM_003737 | 1 | 0 | 0 | 0 | 0 | 0 |
| NM_003738 | 1 | 0 | 1 | 0 | 0 | 1 |
| NM_003739 | 1 | 0 | 1 | 1 | 1 | 1 |
| NM_003740 | 1 | 1 | 1 | 0 | 0 | 1 |
| NM_003742 | 0 | 1 | 0 | 1 | 0 | 0 |
| NM_003744 | 1 | 1 | 1 | 1 | 0 | 0 |
| NM_003745 | 1 | 1 | 1 | 1 | 0 | 1 |
| NM_003746 | 1 | 0 | 1 | 0 | 0 | 1 |
| NM_003747 | 1 | 0 | 1 | 0 | 0 | 1 |
| NM_003749 | 1 | 1 | 1 | 1 | 0 | 1 |
| NM_003750 | 1 | 1 | 1 | 1 | 0 | 1 |
| NM_003751 | 1 | 1 | 1 | 1 | 1 | 1 |
| NM_003752 | 1 | 0 | 1 | 0 | 0 | 1 |
| NM_003753 | 1 | 0 | 1 | 0 | 0 | 0 |
| NM_003754 | 1 | 0 | 1 | 1 | 1 | 1 |
| NM_003755 | 1 | 1 | 1 | 1 | 0 | 0 |
| NM_003756 | 1 | 0 | 1 | 1 | 0 | 0 |
| NM_003757 | 1 | 1 | 1 | 1 | 0 | 1 |
| NM_003758 | 1 | 0 | 1 | 1 | 1 | 1 |
| NM_003759 | 1 | 1 | 1 | 1 | 1 | 0 |
| NM_003760 | 1 | 0 | 1 | 1 | 1 | 1 |
| NM_003761 | 1 | 1 | 1 | 1 | 0 | 1 |
| NM_003762 | 1 | 0 | 1 | 0 | 1 | 1 |
| NM_003763 | 1 | 1 | 1 | 1 | 0 | 0 |
| NM_003764 | 1 | 1 | 1 | 1 | 1 | 1 |
| NM_003765 | 1 | 0 | 1 | 1 | 0 | 0 |
| NM_003766 | 1 | 0 | 1 | 0 | 0 | 0 |
| NM_003768 | 1 | 1 | 1 | 1 | 0 | 1 |
| NM_003769 | 1 | 0 | 1 | 1 | 0 | 0 |
| NM_003770 | 1 | 0 | 1 | 1 | 0 | 1 |
| NM_003772 | 1 | 0 | 1 | 0 | 1 | 1 |
| NM_003774 | 1 | 1 | 1 | 0 | 0 | 1 |
| NM_003775 | 1 | 0 | 1 | 0 | 0 | 0 |
| NM_003776 | 1 | 0 | 1 | 0 | 0 | 1 |
| NM_003777 | 1 | 0 | 1 | 0 | 0 | 0 |
| NM_003778 | 1 | 1 | 1 | 1 | 1 | 0 |
| NM_003779 | 1 | 1 | 1 | 1 | 0 | 0 |
| NM_003780 | 1 | 0 | 1 | 0 | 0 | 0 |
| NM_003781 | 1 | 0 | 1 | 0 | 0 | 1 |
| NM_003782 | 1 | 0 | 1 | 0 | 0 | 0 |
| NM_003783 | 1 | 0 | 1 | 0 | 0 | 0 |



|           |   |   |   |   |   |   |
|-----------|---|---|---|---|---|---|
| NM_003784 | 0 | 1 | 0 | 1 | 0 | 0 |
| NM_003785 | 0 | 0 | 0 | 0 | 0 | 1 |
| NM_003786 | 1 | 1 | 1 | 1 | 1 | 1 |
| NM_003790 | 1 | 1 | 1 | 1 | 0 | 1 |
| NM_003791 | 1 | 1 | 1 | 1 | 0 | 0 |
| NM_003792 | 1 | 0 | 1 | 0 | 0 | 0 |
| NM_003793 | 1 | 1 | 1 | 1 | 1 | 1 |
| NM_003794 | 1 | 0 | 1 | 1 | 1 | 0 |
| NM_003795 | 1 | 0 | 1 | 0 | 0 | 0 |
| NM_003796 | 1 | 0 | 1 | 1 | 1 | 0 |
| NM_003797 | 1 | 1 | 1 | 1 | 0 | 0 |
| NM_003798 | 1 | 0 | 1 | 0 | 0 | 1 |
| NM_003799 | 1 | 0 | 1 | 1 | 1 | 1 |
| NM_003800 | 1 | 0 | 1 | 1 | 1 | 0 |
| NM_003801 | 1 | 1 | 1 | 1 | 1 | 1 |
| NM_003802 | 1 | 0 | 1 | 0 | 0 | 1 |
| NM_003803 | 1 | 1 | 1 | 1 | 0 | 1 |
| NM_003804 | 1 | 0 | 1 | 0 | 0 | 0 |
| NM_003805 | 1 | 1 | 1 | 1 | 1 | 1 |
| NM_003806 | 1 | 0 | 1 | 0 | 1 | 0 |
| NM_003807 | 1 | 1 | 1 | 1 | 0 | 0 |
| NM_003809 | 1 | 1 | 1 | 1 | 1 | 0 |
| NM_003810 | 1 | 1 | 1 | 1 | 1 | 1 |
| NM_003811 | 1 | 0 | 1 | 0 | 0 | 0 |
| NM_003812 | 1 | 0 | 1 | 0 | 0 | 0 |
| NM_003813 | 1 | 0 | 1 | 0 | 0 | 0 |
| NM_003814 | 1 | 0 | 1 | 0 | 0 | 0 |
| NM_003815 | 1 | 1 | 1 | 1 | 1 | 0 |
| NM_003816 | 1 | 1 | 1 | 1 | 1 | 0 |
| NM_003818 | 1 | 1 | 1 | 1 | 1 | 0 |
| NM_003819 | 1 | 1 | 1 | 1 | 1 | 1 |
| NM_003820 | 1 | 0 | 1 | 0 | 0 | 1 |
| NM_003821 | 1 | 0 | 1 | 0 | 1 | 1 |
| NM_003822 | 1 | 0 | 0 | 0 | 0 | 1 |
| NM_003823 | 1 | 1 | 1 | 1 | 0 | 1 |
| NM_003824 | 1 | 1 | 1 | 1 | 1 | 1 |
| NM_003826 | 1 | 1 | 1 | 1 | 0 | 0 |
| NM_003827 | 1 | 0 | 1 | 0 | 1 | 1 |
| NM_003828 | 1 | 1 | 1 | 1 | 1 | 0 |
| NM_003829 | 0 | 0 | 1 | 0 | 0 | 0 |
| NM_003830 | 1 | 1 | 1 | 1 | 1 | 1 |
| NM_003831 | 1 | 0 | 1 | 0 | 0 | 1 |
| NM_003832 | 1 | 0 | 1 | 0 | 1 | 0 |
| NM_003834 | 1 | 1 | 1 | 1 | 1 | 0 |
| NM_003835 | 1 | 0 | 1 | 1 | 1 | 1 |
| NM_003836 | 1 | 0 | 1 | 0 | 0 | 1 |
| NM_003838 | 1 | 0 | 1 | 0 | 0 | 0 |
| NM_003839 | 1 | 0 | 1 | 0 | 0 | 1 |
| NM_003840 | 1 | 0 | 1 | 0 | 0 | 0 |
| NM_003841 | 1 | 1 | 1 | 1 | 0 | 1 |
| NM_003843 | 0 | 0 | 1 | 0 | 0 | 0 |
| NM_003844 | 1 | 1 | 1 | 1 | 0 | 1 |

|           |   |   |   |   |   |   |
|-----------|---|---|---|---|---|---|
| NM_003845 | 1 | 0 | 1 | 1 | 1 | 1 |
| NM_003846 | 1 | 1 | 1 | 1 | 1 | 1 |
| NM_003847 | 1 | 0 | 1 | 0 | 0 | 1 |
| NM_003848 | 1 | 0 | 1 | 1 | 0 | 0 |
| NM_003849 | 1 | 0 | 1 | 0 | 0 | 1 |
| NM_003850 | 1 | 0 | 1 | 0 | 0 | 0 |
| NM_003851 | 1 | 0 | 1 | 1 | 1 | 1 |
| NM_003852 | 1 | 1 | 1 | 1 | 0 | 0 |
| NM_003853 | 1 | 1 | 1 | 1 | 0 | 1 |
| NM_003854 | 1 | 1 | 1 | 0 | 0 | 0 |
| NM_003855 | 1 | 1 | 1 | 1 | 0 | 0 |
| NM_003856 | 1 | 0 | 1 | 0 | 0 | 0 |
| NM_003857 | 1 | 1 | 1 | 1 | 0 | 0 |
| NM_003859 | 1 | 1 | 1 | 1 | 0 | 1 |
| NM_003860 | 1 | 0 | 1 | 0 | 1 | 0 |
| NM_003862 | 1 | 0 | 1 | 1 | 0 | 1 |
| NM_003863 | 1 | 0 | 1 | 1 | 0 | 1 |
| NM_003864 | 1 | 1 | 1 | 1 | 0 | 0 |
| NM_003865 | 1 | 0 | 1 | 0 | 1 | 1 |
| NM_003866 | 1 | 0 | 1 | 1 | 0 | 1 |
| NM_003867 | 0 | 1 | 0 | 1 | 0 | 0 |
| NM_003869 | 1 | 0 | 1 | 0 | 0 | 1 |
| NM_003870 | 1 | 1 | 1 | 1 | 0 | 0 |
| NM_003872 | 0 | 0 | 0 | 0 | 1 | 0 |
| NM_003873 | 1 | 0 | 0 | 0 | 0 | 1 |
| NM_003874 | 1 | 0 | 1 | 1 | 0 | 1 |
| NM_003875 | 1 | 0 | 1 | 1 | 0 | 1 |
| NM_003876 | 1 | 0 | 1 | 0 | 1 | 1 |
| NM_003877 | 1 | 0 | 1 | 0 | 0 | 1 |
| NM_003878 | 1 | 1 | 1 | 0 | 0 | 1 |
| NM_003879 | 1 | 1 | 1 | 1 | 0 | 1 |
| NM_003880 | 1 | 0 | 1 | 1 | 0 | 0 |
| NM_003881 | 1 | 1 | 1 | 1 | 0 | 0 |
| NM_003882 | 1 | 0 | 0 | 0 | 0 | 0 |
| NM_003883 | 1 | 1 | 1 | 1 | 0 | 1 |
| NM_003884 | 1 | 1 | 1 | 1 | 0 | 0 |
| NM_003885 | 1 | 0 | 1 | 0 | 0 | 0 |
| NM_003886 | 0 | 0 | 0 | 0 | 0 | 1 |
| NM_003887 | 1 | 0 | 1 | 0 | 0 | 0 |
| NM_003890 | 1 | 1 | 1 | 1 | 1 | 1 |
| NM_003891 | 1 | 0 | 1 | 0 | 0 | 0 |
| NM_003893 | 1 | 0 | 1 | 0 | 0 | 0 |
| NM_003894 | 1 | 1 | 1 | 1 | 0 | 0 |
| NM_003895 | 1 | 0 | 0 | 0 | 0 | 0 |
| NM_003896 | 1 | 0 | 1 | 1 | 0 | 0 |
| NM_003897 | 1 | 0 | 1 | 0 | 0 | 1 |
| NM_003898 | 1 | 0 | 1 | 0 | 0 | 0 |
| NM_003899 | 1 | 0 | 1 | 0 | 0 | 0 |
| NM_003900 | 1 | 1 | 1 | 1 | 0 | 1 |
| NM_003901 | 1 | 0 | 1 | 0 | 0 | 0 |
| NM_003902 | 1 | 1 | 1 | 1 | 0 | 1 |
| NM_003903 | 1 | 0 | 1 | 1 | 1 | 1 |

|           |   |   |   |   |   |   |
|-----------|---|---|---|---|---|---|
| NM_003904 | 1 | 0 | 1 | 1 | 0 | 1 |
| NM_003905 | 1 | 0 | 1 | 1 | 1 | 1 |
| NM_003906 | 1 | 1 | 1 | 1 | 0 | 0 |
| NM_003907 | 1 | 1 | 1 | 1 | 0 | 0 |
| NM_003908 | 1 | 0 | 1 | 0 | 0 | 0 |
| NM_003909 | 1 | 1 | 1 | 1 | 0 | 1 |
| NM_003910 | 1 | 1 | 1 | 1 | 0 | 0 |
| NM_003913 | 1 | 0 | 1 | 1 | 0 | 0 |
| NM_003914 | 1 | 1 | 1 | 0 | 0 | 0 |
| NM_003916 | 1 | 1 | 1 | 1 | 1 | 1 |
| NM_003917 | 1 | 0 | 1 | 0 | 0 | 1 |
| NM_003918 | 0 | 0 | 1 | 0 | 0 | 0 |
| NM_003919 | 1 | 0 | 1 | 0 | 1 | 1 |
| NM_003920 | 1 | 1 | 1 | 1 | 0 | 1 |
| NM_003921 | 1 | 0 | 1 | 1 | 1 | 1 |
| NM_003922 | 1 | 1 | 1 | 0 | 1 | 1 |
| NM_003923 | 1 | 0 | 1 | 1 | 0 | 0 |
| NM_003924 | 1 | 0 | 1 | 0 | 0 | 0 |
| NM_003925 | 1 | 1 | 1 | 1 | 0 | 1 |
| NM_003926 | 1 | 1 | 1 | 1 | 0 | 0 |
| NM_003928 | 1 | 1 | 1 | 1 | 0 | 1 |
| NM_003929 | 1 | 0 | 1 | 0 | 0 | 1 |
| NM_003930 | 1 | 1 | 1 | 1 | 1 | 1 |
| NM_003931 | 1 | 1 | 1 | 1 | 0 | 0 |
| NM_003932 | 1 | 1 | 1 | 1 | 1 | 1 |
| NM_003933 | 1 | 1 | 1 | 1 | 0 | 0 |
| NM_003935 | 1 | 0 | 1 | 0 | 0 | 0 |
| NM_003936 | 0 | 0 | 1 | 0 | 0 | 0 |
| NM_003937 | 1 | 1 | 1 | 1 | 0 | 1 |
| NM_003938 | 1 | 0 | 1 | 0 | 0 | 0 |
| NM_003940 | 1 | 1 | 1 | 1 | 1 | 1 |
| NM_003941 | 1 | 0 | 1 | 0 | 0 | 0 |
| NM_003942 | 1 | 1 | 1 | 1 | 0 | 0 |
| NM_003943 | 1 | 0 | 1 | 0 | 0 | 0 |
| NM_003944 | 1 | 0 | 1 | 0 | 0 | 0 |
| NM_003945 | 1 | 0 | 1 | 1 | 0 | 1 |
| NM_003946 | 1 | 1 | 1 | 1 | 0 | 0 |
| NM_003948 | 1 | 1 | 1 | 0 | 0 | 0 |
| NM_003949 | 1 | 0 | 1 | 1 | 0 | 0 |
| NM_003950 | 1 | 1 | 1 | 1 | 0 | 0 |
| NM_003951 | 1 | 0 | 1 | 0 | 0 | 0 |
| NM_003952 | 1 | 0 | 1 | 0 | 0 | 0 |
| NM_003953 | 1 | 1 | 1 | 1 | 0 | 1 |
| NM_003954 | 1 | 0 | 1 | 0 | 1 | 1 |
| NM_003955 | 1 | 0 | 1 | 0 | 0 | 0 |
| NM_003957 | 0 | 0 | 0 | 0 | 0 | 1 |
| NM_003958 | 1 | 1 | 1 | 1 | 0 | 0 |
| NM_003960 | 1 | 0 | 0 | 0 | 0 | 1 |
| NM_003961 | 1 | 0 | 1 | 0 | 0 | 0 |
| NM_003963 | 1 | 0 | 1 | 0 | 0 | 0 |
| NM_003965 | 1 | 0 | 1 | 1 | 0 | 0 |
| NM_003966 | 1 | 1 | 0 | 0 | 0 | 1 |

|           |   |   |   |   |   |   |
|-----------|---|---|---|---|---|---|
| NM_003967 | 1 | 0 | 1 | 1 | 0 | 0 |
| NM_003968 | 1 | 0 | 1 | 0 | 0 | 0 |
| NM_003969 | 1 | 0 | 1 | 0 | 0 | 1 |
| NM_003970 | 1 | 1 | 1 | 1 | 1 | 1 |
| NM_003971 | 1 | 0 | 1 | 1 | 0 | 0 |
| NM_003972 | 1 | 0 | 1 | 1 | 1 | 0 |
| NM_003973 | 1 | 0 | 1 | 1 | 1 | 1 |
| NM_003974 | 1 | 1 | 1 | 1 | 0 | 1 |
| NM_003975 | 1 | 1 | 1 | 1 | 1 | 1 |
| NM_003977 | 1 | 0 | 1 | 1 | 0 | 0 |
| NM_003978 | 1 | 1 | 1 | 1 | 0 | 1 |
| NM_003979 | 1 | 0 | 1 | 0 | 0 | 0 |
| NM_003980 | 1 | 1 | 1 | 1 | 0 | 1 |
| NM_003981 | 1 | 1 | 1 | 0 | 0 | 1 |
| NM_003982 | 1 | 1 | 1 | 1 | 0 | 1 |
| NM_003983 | 1 | 1 | 1 | 1 | 0 | 1 |
| NM_003984 | 0 | 0 | 0 | 0 | 0 | 1 |
| NM_003985 | 1 | 0 | 1 | 1 | 0 | 0 |
| NM_003989 | 1 | 1 | 1 | 1 | 0 | 0 |
| NM_003991 | 1 | 0 | 1 | 0 | 0 | 0 |
| NM_003993 | 1 | 0 | 1 | 1 | 0 | 0 |
| NM_003994 | 1 | 0 | 1 | 0 | 0 | 1 |
| NM_003995 | 1 | 1 | 1 | 1 | 0 | 1 |
| NM_003996 | 1 | 0 | 1 | 0 | 0 | 1 |
| NM_003998 | 1 | 1 | 1 | 1 | 0 | 1 |
| NM_003999 | 1 | 0 | 1 | 0 | 0 | 0 |
| NM_004000 | 1 | 1 | 1 | 1 | 0 | 0 |
| NM_004001 | 1 | 0 | 1 | 1 | 1 | 1 |
| NM_004003 | 1 | 1 | 1 | 1 | 0 | 1 |
| NM_004004 | 1 | 0 | 1 | 0 | 0 | 1 |
| NM_004010 | 1 | 0 | 1 | 0 | 0 | 1 |
| NM_004019 | 1 | 0 | 1 | 0 | 0 | 0 |
| NM_004024 | 1 | 1 | 1 | 1 | 1 | 1 |
| NM_004027 | 1 | 0 | 1 | 1 | 1 | 1 |
| NM_004029 | 1 | 0 | 1 | 0 | 1 | 1 |
| NM_004031 | 1 | 0 | 1 | 0 | 1 | 1 |
| NM_004032 | 1 | 0 | 1 | 1 | 0 | 0 |
| NM_004033 | 1 | 1 | 1 | 0 | 0 | 0 |
| NM_004034 | 1 | 1 | 1 | 1 | 0 | 0 |
| NM_004035 | 1 | 1 | 1 | 1 | 0 | 0 |
| NM_004036 | 1 | 1 | 1 | 1 | 0 | 1 |
| NM_004037 | 1 | 0 | 1 | 0 | 0 | 1 |
| NM_004038 | 1 | 0 | 1 | 0 | 1 | 1 |
| NM_004039 | 1 | 1 | 1 | 1 | 1 | 1 |
| NM_004040 | 1 | 0 | 1 | 0 | 1 | 1 |
| NM_004041 | 1 | 0 | 1 | 0 | 0 | 1 |
| NM_004043 | 1 | 0 | 1 | 0 | 0 | 1 |
| NM_004044 | 1 | 1 | 1 | 1 | 0 | 1 |
| NM_004045 | 1 | 1 | 1 | 0 | 1 | 1 |
| NM_004046 | 1 | 1 | 1 | 1 | 0 | 1 |
| NM_004047 | 1 | 0 | 1 | 1 | 0 | 1 |
| NM_004049 | 1 | 0 | 1 | 1 | 1 | 1 |

|           |   |   |   |   |   |   |
|-----------|---|---|---|---|---|---|
| NM_004050 | 1 | 1 | 1 | 1 | 0 | 0 |
| NM_004051 | 1 | 1 | 1 | 1 | 0 | 0 |
| NM_004052 | 1 | 1 | 1 | 1 | 0 | 1 |
| NM_004053 | 1 | 1 | 1 | 1 | 0 | 1 |
| NM_004054 | 1 | 1 | 1 | 1 | 1 | 1 |
| NM_004055 | 1 | 0 | 1 | 0 | 1 | 0 |
| NM_004056 | 1 | 0 | 1 | 0 | 0 | 0 |
| NM_004057 | 0 | 1 | 1 | 1 | 0 | 0 |
| NM_004058 | 1 | 1 | 1 | 1 | 0 | 0 |
| NM_004059 | 1 | 1 | 1 | 1 | 0 | 0 |
| NM_004060 | 1 | 0 | 1 | 0 | 0 | 1 |
| NM_004061 | 1 | 0 | 0 | 0 | 0 | 1 |
| NM_004062 | 1 | 0 | 1 | 1 | 0 | 0 |
| NM_004063 | 1 | 0 | 1 | 0 | 0 | 0 |
| NM_004064 | 1 | 1 | 1 | 1 | 0 | 0 |
| NM_004066 | 1 | 0 | 0 | 0 | 0 | 0 |
| NM_004067 | 1 | 0 | 1 | 0 | 0 | 1 |
| NM_004068 | 1 | 0 | 1 | 0 | 0 | 0 |
| NM_004070 | 1 | 1 | 1 | 1 | 0 | 0 |
| NM_004071 | 1 | 0 | 1 | 0 | 0 | 0 |
| NM_004072 | 1 | 0 | 1 | 0 | 0 | 0 |
| NM_004073 | 1 | 1 | 1 | 1 | 0 | 0 |
| NM_004074 | 1 | 1 | 1 | 0 | 1 | 1 |
| NM_004075 | 1 | 0 | 1 | 0 | 1 | 0 |
| NM_004076 | 1 | 1 | 1 | 1 | 0 | 0 |
| NM_004077 | 1 | 1 | 1 | 1 | 0 | 0 |
| NM_004078 | 1 | 1 | 1 | 0 | 0 | 0 |
| NM_004079 | 1 | 1 | 1 | 1 | 0 | 1 |
| NM_004080 | 1 | 0 | 1 | 1 | 0 | 0 |
| NM_004081 | 0 | 0 | 0 | 0 | 0 | 1 |
| NM_004082 | 1 | 0 | 1 | 1 | 0 | 0 |
| NM_004083 | 1 | 1 | 1 | 1 | 1 | 1 |
| NM_004084 | 1 | 1 | 1 | 1 | 0 | 1 |
| NM_004085 | 1 | 0 | 1 | 0 | 0 | 1 |
| NM_004086 | 1 | 0 | 1 | 0 | 0 | 0 |
| NM_004087 | 1 | 0 | 1 | 0 | 0 | 1 |
| NM_004088 | 0 | 0 | 0 | 0 | 0 | 1 |
| NM_004089 | 1 | 1 | 1 | 1 | 0 | 1 |
| NM_004090 | 1 | 0 | 1 | 0 | 0 | 0 |
| NM_004091 | 1 | 0 | 1 | 1 | 0 | 0 |
| NM_004092 | 1 | 0 | 1 | 1 | 0 | 1 |
| NM_004093 | 1 | 0 | 1 | 0 | 0 | 0 |
| NM_004094 | 1 | 1 | 1 | 1 | 0 | 1 |
| NM_004095 | 1 | 1 | 1 | 1 | 0 | 1 |
| NM_004096 | 1 | 1 | 1 | 1 | 0 | 0 |
| NM_004098 | 1 | 1 | 0 | 0 | 0 | 1 |
| NM_004099 | 1 | 1 | 1 | 1 | 0 | 1 |
| NM_004102 | 1 | 0 | 1 | 0 | 0 | 0 |
| NM_004104 | 1 | 1 | 1 | 1 | 0 | 0 |
| NM_004105 | 1 | 0 | 1 | 0 | 0 | 0 |
| NM_004106 | 1 | 0 | 1 | 0 | 1 | 1 |
| NM_004107 | 1 | 0 | 1 | 1 | 1 | 1 |

|           |   |   |   |   |   |   |
|-----------|---|---|---|---|---|---|
| NM_004108 | 1 | 1 | 1 | 1 | 1 | 1 |
| NM_004109 | 1 | 0 | 1 | 1 | 0 | 1 |
| NM_004110 | 1 | 0 | 1 | 0 | 0 | 1 |
| NM_004111 | 1 | 0 | 1 | 0 | 1 | 1 |
| NM_004113 | 0 | 0 | 1 | 0 | 0 | 0 |
| NM_004114 | 1 | 0 | 1 | 0 | 1 | 1 |
| NM_004115 | 1 | 0 | 1 | 0 | 1 | 1 |
| NM_004117 | 1 | 1 | 1 | 1 | 0 | 0 |
| NM_004118 | 1 | 1 | 1 | 1 | 0 | 0 |
| NM_004119 | 1 | 1 | 1 | 1 | 1 | 1 |
| NM_004120 | 1 | 1 | 1 | 1 | 1 | 1 |
| NM_004121 | 1 | 0 | 1 | 1 | 0 | 0 |
| NM_004122 | 1 | 1 | 1 | 0 | 0 | 0 |
| NM_004124 | 1 | 0 | 1 | 0 | 0 | 1 |
| NM_004125 | 1 | 0 | 1 | 0 | 0 | 1 |
| NM_004126 | 1 | 0 | 1 | 0 | 0 | 1 |
| NM_004127 | 1 | 0 | 1 | 1 | 0 | 0 |
| NM_004128 | 1 | 0 | 1 | 0 | 0 | 0 |
| NM_004129 | 1 | 1 | 1 | 1 | 0 | 0 |
| NM_004130 | 1 | 0 | 1 | 1 | 1 | 1 |
| NM_004131 | 1 | 1 | 1 | 1 | 0 | 0 |
| NM_004132 | 1 | 1 | 1 | 1 | 0 | 1 |
| NM_004134 | 1 | 1 | 1 | 1 | 0 | 1 |
| NM_004135 | 1 | 1 | 1 | 0 | 0 | 0 |
| NM_004137 | 1 | 1 | 1 | 1 | 0 | 0 |
| NM_004138 | 1 | 0 | 1 | 0 | 0 | 0 |
| NM_004139 | 1 | 0 | 1 | 0 | 0 | 0 |
| NM_004142 | 1 | 0 | 1 | 1 | 0 | 0 |
| NM_004143 | 1 | 0 | 1 | 1 | 0 | 0 |
| NM_004145 | 1 | 0 | 1 | 0 | 0 | 0 |
| NM_004146 | 1 | 1 | 1 | 1 | 0 | 1 |
| NM_004147 | 1 | 1 | 1 | 1 | 0 | 0 |
| NM_004148 | 1 | 1 | 1 | 1 | 0 | 0 |
| NM_004152 | 1 | 1 | 0 | 0 | 0 | 0 |
| NM_004153 | 1 | 0 | 1 | 0 | 1 | 1 |
| NM_004154 | 1 | 0 | 1 | 0 | 0 | 0 |
| NM_004155 | 1 | 1 | 1 | 1 | 0 | 0 |
| NM_004156 | 1 | 0 | 1 | 0 | 0 | 0 |
| NM_004157 | 1 | 0 | 1 | 1 | 0 | 1 |
| NM_004158 | 1 | 1 | 1 | 1 | 0 | 0 |
| NM_004159 | 1 | 0 | 1 | 1 | 1 | 1 |
| NM_004160 | 1 | 0 | 0 | 0 | 0 | 1 |
| NM_004161 | 1 | 1 | 1 | 1 | 0 | 0 |
| NM_004162 | 1 | 1 | 1 | 1 | 0 | 1 |
| NM_004163 | 1 | 0 | 1 | 1 | 1 | 1 |
| NM_004164 | 0 | 0 | 0 | 0 | 0 | 1 |
| NM_004165 | 1 | 0 | 0 | 0 | 0 | 1 |
| NM_004166 | 1 | 0 | 0 | 0 | 0 | 0 |
| NM_004168 | 1 | 0 | 1 | 1 | 0 | 1 |
| NM_004169 | 1 | 0 | 1 | 0 | 0 | 1 |
| NM_004170 | 1 | 0 | 1 | 0 | 0 | 1 |
| NM_004171 | 1 | 0 | 1 | 0 | 0 | 1 |

|           |   |   |   |   |   |   |
|-----------|---|---|---|---|---|---|
| NM_004172 | 1 | 1 | 1 | 1 | 1 | 1 |
| NM_004173 | 1 | 1 | 1 | 1 | 0 | 0 |
| NM_004174 | 1 | 0 | 1 | 0 | 0 | 0 |
| NM_004175 | 1 | 0 | 1 | 0 | 0 | 1 |
| NM_004176 | 1 | 1 | 1 | 1 | 1 | 1 |
| NM_004177 | 1 | 0 | 1 | 1 | 1 | 1 |
| NM_004178 | 1 | 1 | 1 | 1 | 0 | 1 |
| NM_004180 | 1 | 0 | 1 | 1 | 1 | 1 |
| NM_004181 | 1 | 0 | 1 | 0 | 0 | 0 |
| NM_004183 | 1 | 1 | 1 | 1 | 0 | 1 |
| NM_004184 | 1 | 1 | 1 | 1 | 0 | 1 |
| NM_004185 | 1 | 0 | 1 | 0 | 0 | 0 |
| NM_004186 | 1 | 1 | 1 | 1 | 0 | 0 |
| NM_004187 | 1 | 0 | 1 | 0 | 0 | 0 |
| NM_004188 | 1 | 0 | 1 | 0 | 0 | 1 |
| NM_004189 | 1 | 0 | 1 | 0 | 0 | 0 |
| NM_004190 | 0 | 1 | 0 | 1 | 0 | 1 |
| NM_004192 | 1 | 1 | 1 | 1 | 0 | 0 |
| NM_004193 | 1 | 0 | 1 | 0 | 0 | 0 |
| NM_004195 | 1 | 0 | 1 | 1 | 0 | 0 |
| NM_004196 | 1 | 0 | 1 | 0 | 0 | 1 |
| NM_004197 | 1 | 0 | 1 | 0 | 1 | 0 |
| NM_004198 | 1 | 1 | 1 | 1 | 0 | 0 |
| NM_004199 | 1 | 0 | 1 | 0 | 1 | 1 |
| NM_004202 | 1 | 1 | 1 | 0 | 1 | 1 |
| NM_004203 | 1 | 0 | 1 | 0 | 1 | 1 |
| NM_004205 | 0 | 0 | 0 | 1 | 0 | 0 |
| NM_004206 | 1 | 0 | 1 | 1 | 0 | 0 |
| NM_004207 | 1 | 1 | 1 | 1 | 1 | 1 |
| NM_004208 | 1 | 1 | 1 | 1 | 0 | 1 |
| NM_004209 | 1 | 0 | 1 | 0 | 1 | 1 |
| NM_004210 | 1 | 0 | 1 | 1 | 0 | 0 |
| NM_004211 | 1 | 0 | 1 | 1 | 1 | 1 |
| NM_004212 | 1 | 1 | 1 | 1 | 1 | 0 |
| NM_004214 | 1 | 0 | 1 | 0 | 0 | 1 |
| NM_004215 | 1 | 1 | 1 | 1 | 1 | 1 |
| NM_004216 | 1 | 0 | 1 | 0 | 1 | 1 |
| NM_004217 | 1 | 0 | 1 | 0 | 1 | 1 |
| NM_004218 | 1 | 0 | 1 | 1 | 0 | 0 |
| NM_004219 | 1 | 1 | 1 | 0 | 0 | 0 |
| NM_004220 | 1 | 1 | 1 | 1 | 0 | 0 |
| NM_004221 | 1 | 0 | 1 | 1 | 0 | 1 |
| NM_004223 | 1 | 0 | 1 | 0 | 1 | 1 |
| NM_004224 | 0 | 0 | 0 | 0 | 0 | 1 |
| NM_004225 | 1 | 1 | 1 | 1 | 0 | 1 |
| NM_004226 | 1 | 1 | 1 | 1 | 1 | 1 |
| NM_004227 | 1 | 0 | 1 | 0 | 0 | 1 |
| NM_004228 | 1 | 0 | 1 | 1 | 0 | 0 |
| NM_004229 | 0 | 0 | 0 | 0 | 0 | 1 |
| NM_004230 | 1 | 1 | 1 | 1 | 0 | 0 |
| NM_004231 | 1 | 1 | 1 | 1 | 0 | 0 |
| NM_004232 | 1 | 0 | 1 | 0 | 0 | 0 |

|           |   |   |   |   |   |   |
|-----------|---|---|---|---|---|---|
| NM_004233 | 1 | 1 | 1 | 1 | 0 | 0 |
| NM_004234 | 1 | 1 | 1 | 1 | 0 | 0 |
| NM_004235 | 1 | 0 | 1 | 1 | 1 | 1 |
| NM_004236 | 1 | 0 | 1 | 1 | 0 | 1 |
| NM_004237 | 1 | 0 | 1 | 0 | 0 | 0 |
| NM_004238 | 1 | 0 | 1 | 1 | 0 | 1 |
| NM_004239 | 1 | 1 | 1 | 1 | 0 | 1 |
| NM_004240 | 1 | 1 | 1 | 1 | 1 | 0 |
| NM_004241 | 1 | 1 | 1 | 1 | 0 | 0 |
| NM_004242 | 1 | 0 | 1 | 1 | 1 | 0 |
| NM_004244 | 1 | 1 | 1 | 1 | 0 | 0 |
| NM_004245 | 1 | 0 | 1 | 1 | 0 | 1 |
| NM_004247 | 1 | 0 | 0 | 0 | 1 | 1 |
| NM_004248 | 1 | 0 | 1 | 0 | 0 | 0 |
| NM_004249 | 1 | 0 | 1 | 0 | 0 | 1 |
| NM_004251 | 1 | 0 | 1 | 0 | 0 | 0 |
| NM_004252 | 1 | 1 | 1 | 1 | 0 | 1 |
| NM_004253 | 1 | 0 | 1 | 0 | 0 | 0 |
| NM_004255 | 1 | 1 | 1 | 0 | 0 | 1 |
| NM_004256 | 1 | 0 | 1 | 1 | 0 | 1 |
| NM_004257 | 1 | 1 | 1 | 1 | 0 | 1 |
| NM_004258 | 1 | 1 | 1 | 1 | 0 | 0 |
| NM_004259 | 0 | 0 | 0 | 0 | 0 | 1 |
| NM_004260 | 1 | 0 | 1 | 0 | 0 | 0 |
| NM_004261 | 1 | 0 | 1 | 0 | 0 | 0 |
| NM_004263 | 1 | 1 | 1 | 1 | 0 | 1 |
| NM_004264 | 1 | 0 | 1 | 0 | 0 | 0 |
| NM_004265 | 1 | 1 | 1 | 1 | 1 | 1 |
| NM_004267 | 1 | 1 | 1 | 1 | 1 | 1 |
| NM_004268 | 1 | 0 | 1 | 0 | 0 | 0 |
| NM_004269 | 1 | 0 | 1 | 1 | 0 | 0 |
| NM_004270 | 1 | 1 | 1 | 1 | 0 | 0 |
| NM_004271 | 1 | 1 | 1 | 1 | 0 | 1 |
| NM_004272 | 1 | 1 | 1 | 1 | 1 | 1 |
| NM_004275 | 1 | 1 | 1 | 0 | 0 | 1 |
| NM_004276 | 1 | 0 | 0 | 1 | 0 | 0 |
| NM_004277 | 1 | 0 | 1 | 0 | 0 | 0 |
| NM_004279 | 1 | 0 | 1 | 0 | 1 | 1 |
| NM_004280 | 1 | 0 | 1 | 1 | 0 | 1 |
| NM_004281 | 1 | 1 | 1 | 1 | 0 | 1 |
| NM_004282 | 1 | 0 | 1 | 0 | 0 | 1 |
| NM_004283 | 1 | 0 | 1 | 0 | 0 | 1 |
| NM_004285 | 1 | 0 | 1 | 0 | 0 | 0 |
| NM_004286 | 1 | 0 | 1 | 0 | 0 | 0 |
| NM_004287 | 1 | 1 | 1 | 0 | 0 | 0 |
| NM_004288 | 1 | 0 | 1 | 0 | 0 | 1 |
| NM_004289 | 1 | 1 | 1 | 1 | 0 | 0 |
| NM_004290 | 1 | 0 | 1 | 0 | 1 | 1 |
| NM_004291 | 0 | 0 | 0 | 1 | 0 | 0 |
| NM_004292 | 1 | 1 | 1 | 1 | 0 | 0 |
| NM_004294 | 1 | 1 | 1 | 1 | 0 | 0 |
| NM_004295 | 1 | 0 | 1 | 1 | 0 | 1 |



|           |   |   |   |   |   |   |
|-----------|---|---|---|---|---|---|
| NM_004296 | 1 | 0 | 1 | 1 | 0 | 0 |
| NM_004297 | 1 | 0 | 1 | 0 | 0 | 1 |
| NM_004298 | 1 | 0 | 1 | 0 | 0 | 0 |
| NM_004299 | 1 | 1 | 1 | 1 | 1 | 1 |
| NM_004300 | 1 | 0 | 1 | 1 | 1 | 1 |
| NM_004301 | 1 | 1 | 1 | 1 | 0 | 1 |
| NM_004302 | 1 | 1 | 1 | 1 | 0 | 1 |
| NM_004304 | 1 | 0 | 1 | 0 | 0 | 0 |
| NM_004305 | 1 | 1 | 1 | 1 | 0 | 1 |
| NM_004308 | 1 | 1 | 1 | 0 | 0 | 1 |
| NM_004309 | 1 | 1 | 1 | 1 | 0 | 0 |
| NM_004310 | 1 | 1 | 1 | 1 | 0 | 1 |
| NM_004311 | 1 | 0 | 1 | 0 | 0 | 0 |
| NM_004312 | 0 | 0 | 1 | 0 | 0 | 1 |
| NM_004313 | 0 | 0 | 1 | 0 | 0 | 0 |
| NM_004314 | 1 | 1 | 0 | 0 | 0 | 1 |
| NM_004315 | 1 | 1 | 1 | 1 | 0 | 0 |
| NM_004317 | 1 | 0 | 1 | 0 | 0 | 0 |
| NM_004318 | 1 | 0 | 1 | 0 | 0 | 0 |
| NM_004320 | 1 | 1 | 1 | 0 | 0 | 0 |
| NM_004321 | 1 | 0 | 1 | 0 | 0 | 0 |
| NM_004323 | 1 | 1 | 1 | 1 | 0 | 1 |
| NM_004324 | 1 | 0 | 1 | 0 | 0 | 0 |
| NM_004326 | 1 | 1 | 1 | 1 | 0 | 0 |
| NM_004327 | 1 | 1 | 1 | 1 | 0 | 0 |
| NM_004328 | 1 | 0 | 1 | 0 | 0 | 1 |
| NM_004329 | 1 | 0 | 1 | 1 | 0 | 1 |
| NM_004330 | 1 | 0 | 1 | 1 | 0 | 0 |
| NM_004331 | 1 | 1 | 1 | 1 | 0 | 1 |
| NM_004332 | 1 | 0 | 1 | 1 | 0 | 0 |
| NM_004333 | 1 | 0 | 1 | 0 | 0 | 0 |
| NM_004334 | 1 | 0 | 1 | 1 | 1 | 1 |
| NM_004335 | 1 | 0 | 1 | 0 | 1 | 1 |
| NM_004336 | 1 | 0 | 1 | 0 | 1 | 1 |
| NM_004337 | 1 | 1 | 1 | 1 | 0 | 0 |
| NM_004338 | 1 | 1 | 1 | 1 | 1 | 1 |
| NM_004339 | 1 | 1 | 1 | 1 | 0 | 0 |
| NM_004341 | 1 | 1 | 1 | 1 | 1 | 1 |
| NM_004342 | 1 | 0 | 1 | 0 | 0 | 0 |
| NM_004343 | 1 | 1 | 1 | 1 | 0 | 1 |
| NM_004344 | 1 | 0 | 1 | 0 | 1 | 1 |
| NM_004345 | 1 | 1 | 1 | 1 | 0 | 0 |
| NM_004347 | 1 | 1 | 1 | 1 | 0 | 0 |
| NM_004348 | 1 | 0 | 1 | 0 | 0 | 0 |
| NM_004349 | 0 | 0 | 0 | 0 | 0 | 1 |
| NM_004350 | 1 | 0 | 1 | 1 | 1 | 0 |
| NM_004353 | 1 | 0 | 1 | 0 | 1 | 0 |
| NM_004354 | 1 | 1 | 1 | 1 | 0 | 1 |
| NM_004356 | 1 | 0 | 1 | 1 | 0 | 1 |
| NM_004357 | 1 | 0 | 1 | 0 | 0 | 0 |
| NM_004358 | 1 | 0 | 1 | 1 | 0 | 1 |
| NM_004359 | 1 | 0 | 1 | 1 | 0 | 1 |

|           |   |   |   |   |   |   |
|-----------|---|---|---|---|---|---|
| NM_004360 | 1 | 1 | 1 | 1 | 0 | 0 |
| NM_004361 | 1 | 0 | 1 | 0 | 0 | 0 |
| NM_004362 | 1 | 0 | 1 | 0 | 0 | 0 |
| NM_004363 | 0 | 0 | 1 | 0 | 0 | 0 |
| NM_004364 | 1 | 0 | 1 | 1 | 0 | 0 |
| NM_004365 | 1 | 0 | 1 | 1 | 0 | 1 |
| NM_004366 | 1 | 1 | 1 | 0 | 0 | 0 |
| NM_004367 | 1 | 0 | 1 | 0 | 0 | 1 |
| NM_004368 | 0 | 1 | 1 | 1 | 0 | 0 |
| NM_004369 | 1 | 1 | 1 | 1 | 0 | 0 |
| NM_004371 | 1 | 0 | 1 | 0 | 0 | 0 |
| NM_004373 | 1 | 0 | 1 | 0 | 1 | 1 |
| NM_004374 | 1 | 1 | 1 | 1 | 0 | 1 |
| NM_004375 | 1 | 0 | 1 | 1 | 0 | 0 |
| NM_004376 | 1 | 0 | 1 | 0 | 0 | 0 |
| NM_004377 | 1 | 0 | 1 | 0 | 0 | 1 |
| NM_004379 | 1 | 1 | 1 | 1 | 0 | 0 |
| NM_004380 | 1 | 1 | 1 | 1 | 1 | 1 |
| NM_004381 | 1 | 0 | 1 | 0 | 0 | 1 |
| NM_004382 | 1 | 1 | 1 | 1 | 0 | 0 |
| NM_004383 | 1 | 1 | 1 | 1 | 1 | 1 |
| NM_004384 | 1 | 0 | 1 | 0 | 0 | 0 |
| NM_004385 | 1 | 1 | 1 | 1 | 1 | 1 |
| NM_004386 | 0 | 0 | 1 | 1 | 0 | 0 |
| NM_004387 | 1 | 0 | 1 | 1 | 0 | 0 |
| NM_004388 | 1 | 1 | 1 | 1 | 0 | 1 |
| NM_004389 | 1 | 0 | 1 | 0 | 0 | 0 |
| NM_004390 | 1 | 1 | 1 | 1 | 1 | 1 |
| NM_004392 | 1 | 0 | 1 | 1 | 0 | 0 |
| NM_004393 | 1 | 0 | 1 | 0 | 0 | 0 |
| NM_004394 | 1 | 0 | 1 | 0 | 0 | 1 |
| NM_004395 | 1 | 0 | 1 | 0 | 1 | 1 |
| NM_004396 | 1 | 0 | 1 | 0 | 0 | 0 |
| NM_004397 | 1 | 0 | 1 | 0 | 0 | 1 |
| NM_004398 | 1 | 0 | 1 | 1 | 0 | 0 |
| NM_004399 | 1 | 0 | 1 | 0 | 1 | 1 |
| NM_004401 | 1 | 0 | 0 | 0 | 0 | 0 |
| NM_004402 | 1 | 1 | 1 | 1 | 0 | 0 |
| NM_004403 | 1 | 0 | 1 | 1 | 0 | 1 |
| NM_004404 | 1 | 0 | 1 | 1 | 1 | 1 |
| NM_004405 | 1 | 0 | 0 | 0 | 0 | 0 |
| NM_004408 | 1 | 1 | 1 | 0 | 0 | 0 |
| NM_004409 | 1 | 0 | 1 | 0 | 0 | 1 |
| NM_004411 | 1 | 0 | 1 | 0 | 0 | 0 |
| NM_004412 | 1 | 0 | 1 | 0 | 1 | 0 |
| NM_004413 | 1 | 0 | 1 | 0 | 0 | 1 |
| NM_004414 | 1 | 0 | 1 | 0 | 0 | 0 |
| NM_004415 | 1 | 0 | 1 | 0 | 0 | 1 |
| NM_004416 | 1 | 0 | 1 | 0 | 0 | 0 |
| NM_004417 | 1 | 1 | 1 | 1 | 1 | 1 |
| NM_004418 | 1 | 0 | 1 | 1 | 1 | 1 |
| NM_004419 | 1 | 1 | 1 | 1 | 0 | 1 |

|           |   |   |   |   |   |   |
|-----------|---|---|---|---|---|---|
| NM_004420 | 1 | 0 | 1 | 0 | 1 | 0 |
| NM_004422 | 1 | 1 | 1 | 1 | 0 | 0 |
| NM_004423 | 1 | 0 | 1 | 0 | 0 | 0 |
| NM_004424 | 1 | 0 | 1 | 1 | 0 | 0 |
| NM_004425 | 1 | 1 | 1 | 0 | 1 | 1 |
| NM_004426 | 1 | 1 | 1 | 0 | 0 | 0 |
| NM_004427 | 1 | 0 | 1 | 1 | 0 | 0 |
| NM_004428 | 1 | 0 | 1 | 0 | 0 | 1 |
| NM_004429 | 1 | 0 | 1 | 1 | 0 | 0 |
| NM_004430 | 1 | 1 | 1 | 1 | 1 | 1 |
| NM_004431 | 1 | 1 | 1 | 1 | 1 | 1 |
| NM_004433 | 1 | 0 | 1 | 0 | 1 | 1 |
| NM_004435 | 1 | 1 | 1 | 0 | 1 | 0 |
| NM_004436 | 1 | 0 | 1 | 0 | 0 | 0 |
| NM_004437 | 1 | 1 | 1 | 1 | 0 | 1 |
| NM_004438 | 1 | 1 | 1 | 1 | 1 | 1 |
| NM_004441 | 1 | 1 | 1 | 1 | 1 | 1 |
| NM_004442 | 1 | 1 | 1 | 1 | 0 | 0 |
| NM_004443 | 1 | 1 | 1 | 0 | 0 | 1 |
| NM_004444 | 1 | 1 | 1 | 1 | 0 | 0 |
| NM_004445 | 1 | 1 | 1 | 0 | 0 | 0 |
| NM_004446 | 1 | 0 | 1 | 1 | 1 | 1 |
| NM_004447 | 1 | 1 | 1 | 1 | 0 | 0 |
| NM_004448 | 1 | 0 | 1 | 0 | 0 | 1 |
| NM_004449 | 1 | 1 | 1 | 1 | 0 | 0 |
| NM_004450 | 1 | 0 | 1 | 0 | 0 | 0 |
| NM_004451 | 1 | 0 | 1 | 0 | 0 | 0 |
| NM_004452 | 1 | 1 | 1 | 1 | 0 | 0 |
| NM_004453 | 1 | 1 | 1 | 1 | 1 | 1 |
| NM_004454 | 1 | 0 | 1 | 0 | 0 | 0 |
| NM_004455 | 1 | 1 | 1 | 0 | 0 | 1 |
| NM_004456 | 1 | 0 | 1 | 0 | 0 | 1 |
| NM_004457 | 1 | 0 | 1 | 1 | 1 | 1 |
| NM_004458 | 1 | 1 | 1 | 1 | 1 | 1 |
| NM_004459 | 1 | 0 | 1 | 0 | 0 | 0 |
| NM_004460 | 0 | 0 | 1 | 0 | 0 | 0 |
| NM_004461 | 1 | 1 | 1 | 1 | 0 | 0 |
| NM_004462 | 1 | 1 | 1 | 1 | 0 | 1 |
| NM_004463 | 1 | 0 | 0 | 0 | 0 | 1 |
| NM_004465 | 1 | 0 | 0 | 0 | 0 | 0 |
| NM_004466 | 0 | 0 | 0 | 0 | 0 | 1 |
| NM_004468 | 1 | 1 | 1 | 1 | 1 | 1 |
| NM_004469 | 0 | 1 | 0 | 0 | 0 | 1 |
| NM_004470 | 1 | 1 | 1 | 0 | 0 | 0 |
| NM_004471 | 1 | 0 | 0 | 0 | 0 | 1 |
| NM_004472 | 1 | 0 | 1 | 0 | 0 | 0 |
| NM_004473 | 1 | 0 | 1 | 0 | 0 | 0 |
| NM_004474 | 1 | 1 | 1 | 1 | 0 | 0 |
| NM_004475 | 1 | 1 | 1 | 1 | 0 | 0 |
| NM_004477 | 1 | 0 | 1 | 1 | 0 | 0 |
| NM_004479 | 1 | 1 | 1 | 1 | 1 | 1 |
| NM_004480 | 1 | 1 | 1 | 1 | 0 | 1 |

|           |   |   |   |   |   |   |
|-----------|---|---|---|---|---|---|
| NM_004481 | 1 | 0 | 1 | 1 | 0 | 0 |
| NM_004482 | 1 | 1 | 1 | 1 | 1 | 1 |
| NM_004483 | 1 | 0 | 1 | 0 | 1 | 0 |
| NM_004484 | 1 | 0 | 1 | 0 | 0 | 0 |
| NM_004485 | 1 | 1 | 1 | 1 | 1 | 0 |
| NM_004486 | 1 | 0 | 1 | 0 | 0 | 1 |
| NM_004487 | 1 | 1 | 1 | 1 | 1 | 1 |
| NM_004488 | 1 | 0 | 1 | 0 | 0 | 0 |
| NM_004489 | 1 | 0 | 1 | 1 | 0 | 0 |
| NM_004490 | 1 | 0 | 1 | 0 | 0 | 1 |
| NM_004491 | 1 | 0 | 1 | 1 | 0 | 0 |
| NM_004492 | 1 | 0 | 1 | 0 | 0 | 1 |
| NM_004493 | 1 | 1 | 1 | 1 | 0 | 0 |
| NM_004494 | 1 | 1 | 1 | 1 | 1 | 1 |
| NM_004495 | 1 | 1 | 1 | 1 | 0 | 0 |
| NM_004497 | 1 | 0 | 1 | 1 | 0 | 0 |
| NM_004499 | 1 | 1 | 1 | 1 | 1 | 1 |
| NM_004500 | 1 | 1 | 1 | 1 | 0 | 1 |
| NM_004501 | 1 | 0 | 1 | 1 | 1 | 0 |
| NM_004502 | 1 | 0 | 0 | 0 | 0 | 0 |
| NM_004504 | 1 | 1 | 1 | 1 | 0 | 1 |
| NM_004505 | 1 | 0 | 1 | 0 | 0 | 1 |
| NM_004506 | 1 | 1 | 1 | 1 | 1 | 0 |
| NM_004507 | 1 | 0 | 1 | 0 | 0 | 0 |
| NM_004508 | 1 | 0 | 1 | 0 | 0 | 0 |
| NM_004509 | 1 | 0 | 1 | 1 | 0 | 0 |
| NM_004510 | 1 | 1 | 1 | 1 | 0 | 0 |
| NM_004512 | 1 | 1 | 1 | 1 | 1 | 1 |
| NM_004513 | 1 | 1 | 1 | 1 | 0 | 1 |
| NM_004514 | 1 | 1 | 1 | 1 | 1 | 0 |
| NM_004515 | 1 | 1 | 1 | 1 | 0 | 1 |
| NM_004516 | 1 | 1 | 1 | 1 | 0 | 1 |
| NM_004517 | 1 | 0 | 1 | 1 | 1 | 1 |
| NM_004519 | 0 | 0 | 0 | 0 | 0 | 1 |
| NM_004520 | 1 | 0 | 1 | 0 | 0 | 1 |
| NM_004521 | 1 | 1 | 1 | 1 | 0 | 0 |
| NM_004522 | 1 | 0 | 1 | 0 | 0 | 1 |
| NM_004523 | 1 | 1 | 1 | 0 | 0 | 0 |
| NM_004524 | 1 | 1 | 1 | 1 | 1 | 0 |
| NM_004526 | 1 | 1 | 1 | 0 | 0 | 0 |
| NM_004527 | 1 | 0 | 1 | 0 | 1 | 0 |
| NM_004528 | 1 | 1 | 1 | 1 | 1 | 0 |
| NM_004529 | 1 | 0 | 1 | 0 | 0 | 0 |
| NM_004530 | 1 | 1 | 1 | 1 | 0 | 0 |
| NM_004531 | 1 | 0 | 1 | 0 | 0 | 0 |
| NM_004533 | 0 | 0 | 1 | 0 | 0 | 0 |
| NM_004535 | 0 | 0 | 0 | 0 | 0 | 1 |
| NM_004536 | 1 | 0 | 1 | 1 | 0 | 0 |
| NM_004537 | 1 | 1 | 1 | 1 | 1 | 1 |
| NM_004538 | 1 | 1 | 1 | 1 | 1 | 1 |
| NM_004539 | 1 | 1 | 1 | 1 | 1 | 1 |
| NM_004540 | 1 | 0 | 1 | 0 | 0 | 0 |

|           |   |   |   |   |   |   |
|-----------|---|---|---|---|---|---|
| NM_004541 | 1 | 0 | 1 | 0 | 1 | 1 |
| NM_004542 | 1 | 1 | 1 | 0 | 0 | 1 |
| NM_004543 | 1 | 1 | 1 | 1 | 0 | 0 |
| NM_004544 | 1 | 1 | 1 | 1 | 0 | 1 |
| NM_004545 | 1 | 0 | 1 | 0 | 0 | 0 |
| NM_004546 | 1 | 0 | 1 | 1 | 0 | 1 |
| NM_004547 | 1 | 1 | 1 | 1 | 0 | 1 |
| NM_004548 | 1 | 1 | 1 | 1 | 0 | 1 |
| NM_004549 | 1 | 0 | 1 | 0 | 1 | 1 |
| NM_004550 | 1 | 0 | 1 | 0 | 0 | 1 |
| NM_004551 | 1 | 1 | 1 | 1 | 0 | 1 |
| NM_004552 | 1 | 1 | 1 | 1 | 0 | 0 |
| NM_004553 | 1 | 1 | 1 | 1 | 0 | 0 |
| NM_004554 | 1 | 1 | 1 | 1 | 0 | 1 |
| NM_004555 | 1 | 0 | 1 | 0 | 0 | 0 |
| NM_004556 | 1 | 1 | 1 | 1 | 1 | 1 |
| NM_004557 | 1 | 0 | 1 | 0 | 0 | 0 |
| NM_004558 | 1 | 0 | 1 | 1 | 0 | 0 |
| NM_004559 | 1 | 1 | 1 | 1 | 0 | 1 |
| NM_004560 | 1 | 0 | 1 | 0 | 0 | 0 |
| NM_004561 | 0 | 0 | 1 | 0 | 0 | 0 |
| NM_004563 | 1 | 0 | 1 | 1 | 1 | 1 |
| NM_004564 | 1 | 0 | 1 | 1 | 0 | 0 |
| NM_004565 | 1 | 0 | 1 | 1 | 1 | 1 |
| NM_004566 | 1 | 1 | 1 | 1 | 1 | 1 |
| NM_004567 | 1 | 1 | 1 | 1 | 0 | 0 |
| NM_004568 | 1 | 1 | 1 | 1 | 0 | 0 |
| NM_004569 | 1 | 1 | 1 | 1 | 0 | 0 |
| NM_004571 | 1 | 0 | 1 | 0 | 0 | 0 |
| NM_004572 | 1 | 1 | 1 | 1 | 0 | 1 |
| NM_004573 | 1 | 1 | 1 | 1 | 0 | 1 |
| NM_004574 | 1 | 0 | 1 | 0 | 1 | 1 |
| NM_004577 | 1 | 0 | 1 | 0 | 1 | 1 |
| NM_004578 | 1 | 0 | 1 | 0 | 0 | 0 |
| NM_004579 | 1 | 0 | 1 | 0 | 0 | 1 |
| NM_004580 | 1 | 1 | 1 | 1 | 1 | 1 |
| NM_004581 | 1 | 1 | 1 | 1 | 0 | 0 |
| NM_004582 | 1 | 1 | 1 | 1 | 1 | 1 |
| NM_004583 | 1 | 0 | 1 | 0 | 0 | 1 |
| NM_004584 | 1 | 0 | 1 | 0 | 0 | 0 |
| NM_004585 | 1 | 1 | 1 | 1 | 0 | 1 |
| NM_004586 | 1 | 0 | 1 | 0 | 0 | 0 |
| NM_004587 | 1 | 1 | 1 | 1 | 1 | 1 |
| NM_004588 | 1 | 0 | 1 | 0 | 0 | 0 |
| NM_004589 | 1 | 0 | 1 | 0 | 1 | 1 |
| NM_004590 | 1 | 0 | 1 | 0 | 0 | 0 |
| NM_004591 | 1 | 1 | 1 | 1 | 1 | 1 |
| NM_004592 | 1 | 1 | 1 | 1 | 0 | 0 |
| NM_004593 | 1 | 0 | 1 | 0 | 0 | 0 |
| NM_004594 | 1 | 0 | 1 | 0 | 0 | 1 |
| NM_004595 | 1 | 1 | 1 | 0 | 1 | 1 |
| NM_004596 | 1 | 1 | 1 | 1 | 0 | 0 |

|           |   |   |   |   |   |   |
|-----------|---|---|---|---|---|---|
| NM_004597 | 1 | 0 | 1 | 0 | 0 | 1 |
| NM_004598 | 1 | 0 | 1 | 0 | 0 | 0 |
| NM_004599 | 1 | 0 | 1 | 0 | 1 | 0 |
| NM_004600 | 1 | 0 | 1 | 1 | 1 | 1 |
| NM_004603 | 1 | 1 | 1 | 1 | 0 | 1 |
| NM_004604 | 1 | 0 | 1 | 0 | 1 | 1 |
| NM_004605 | 1 | 1 | 1 | 1 | 0 | 0 |
| NM_004606 | 1 | 0 | 1 | 0 | 0 | 0 |
| NM_004607 | 1 | 0 | 1 | 1 | 0 | 1 |
| NM_004608 | 1 | 0 | 1 | 0 | 0 | 0 |
| NM_004610 | 0 | 0 | 0 | 0 | 0 | 1 |
| NM_004612 | 1 | 0 | 1 | 1 | 0 | 0 |
| NM_004613 | 1 | 1 | 1 | 1 | 0 | 0 |
| NM_004614 | 1 | 0 | 1 | 1 | 0 | 0 |
| NM_004615 | 0 | 0 | 0 | 0 | 0 | 1 |
| NM_004618 | 1 | 1 | 1 | 1 | 1 | 1 |
| NM_004619 | 1 | 0 | 1 | 1 | 0 | 0 |
| NM_004621 | 1 | 1 | 1 | 1 | 0 | 0 |
| NM_004622 | 1 | 0 | 1 | 0 | 1 | 1 |
| NM_004623 | 1 | 1 | 1 | 1 | 1 | 1 |
| NM_004624 | 1 | 1 | 1 | 1 | 0 | 1 |
| NM_004625 | 1 | 0 | 1 | 0 | 0 | 1 |
| NM_004626 | 1 | 0 | 1 | 0 | 0 | 0 |
| NM_004627 | 1 | 0 | 1 | 0 | 0 | 0 |
| NM_004628 | 1 | 1 | 1 | 1 | 1 | 0 |
| NM_004629 | 1 | 0 | 1 | 0 | 0 | 0 |
| NM_004630 | 1 | 1 | 1 | 1 | 1 | 1 |
| NM_004631 | 1 | 1 | 1 | 1 | 0 | 0 |
| NM_004632 | 1 | 0 | 1 | 1 | 1 | 1 |
| NM_004633 | 1 | 1 | 1 | 1 | 0 | 1 |
| NM_004634 | 1 | 0 | 1 | 1 | 0 | 1 |
| NM_004635 | 1 | 0 | 1 | 0 | 0 | 0 |
| NM_004636 | 0 | 1 | 0 | 0 | 0 | 1 |
| NM_004637 | 1 | 0 | 1 | 1 | 0 | 0 |
| NM_004638 | 1 | 0 | 1 | 0 | 0 | 1 |
| NM_004641 | 1 | 0 | 1 | 0 | 0 | 0 |
| NM_004642 | 1 | 1 | 1 | 1 | 0 | 0 |
| NM_004643 | 1 | 1 | 1 | 1 | 0 | 1 |
| NM_004644 | 0 | 0 | 0 | 0 | 0 | 1 |
| NM_004645 | 1 | 1 | 1 | 1 | 0 | 1 |
| NM_004646 | 1 | 0 | 1 | 1 | 0 | 0 |
| NM_004648 | 1 | 0 | 1 | 1 | 1 | 1 |
| NM_004649 | 1 | 1 | 1 | 1 | 0 | 0 |
| NM_004651 | 1 | 0 | 1 | 1 | 1 | 1 |
| NM_004652 | 1 | 1 | 1 | 1 | 0 | 1 |
| NM_004653 | 1 | 0 | 1 | 1 | 1 | 1 |
| NM_004654 | 1 | 0 | 1 | 1 | 0 | 0 |
| NM_004655 | 1 | 0 | 1 | 1 | 0 | 0 |
| NM_004656 | 1 | 0 | 1 | 0 | 0 | 0 |
| NM_004657 | 1 | 0 | 1 | 0 | 1 | 1 |
| NM_004658 | 1 | 1 | 1 | 1 | 0 | 1 |
| NM_004659 | 1 | 0 | 1 | 0 | 1 | 0 |

|           |   |   |   |   |   |   |
|-----------|---|---|---|---|---|---|
| NM_004660 | 1 | 0 | 1 | 0 | 1 | 0 |
| NM_004661 | 1 | 0 | 1 | 1 | 1 | 1 |
| NM_004662 | 0 | 0 | 0 | 0 | 0 | 1 |
| NM_004663 | 1 | 0 | 1 | 0 | 0 | 1 |
| NM_004664 | 1 | 1 | 1 | 1 | 1 | 1 |
| NM_004665 | 0 | 0 | 1 | 0 | 0 | 0 |
| NM_004666 | 1 | 1 | 1 | 1 | 0 | 1 |
| NM_004667 | 1 | 0 | 1 | 1 | 1 | 1 |
| NM_004668 | 1 | 1 | 1 | 1 | 0 | 1 |
| NM_004669 | 1 | 0 | 1 | 0 | 1 | 1 |
| NM_004670 | 1 | 1 | 1 | 1 | 0 | 0 |
| NM_004671 | 1 | 0 | 1 | 0 | 0 | 1 |
| NM_004672 | 1 | 1 | 1 | 1 | 0 | 0 |
| NM_004673 | 1 | 0 | 1 | 0 | 0 | 1 |
| NM_004674 | 1 | 1 | 1 | 1 | 0 | 1 |
| NM_004675 | 0 | 0 | 1 | 0 | 0 | 0 |
| NM_004676 | 1 | 0 | 0 | 0 | 0 | 0 |
| NM_004677 | 1 | 0 | 1 | 1 | 0 | 0 |
| NM_004678 | 0 | 0 | 1 | 0 | 0 | 0 |
| NM_004679 | 1 | 0 | 1 | 0 | 0 | 0 |
| NM_004680 | 1 | 1 | 1 | 1 | 0 | 0 |
| NM_004681 | 1 | 1 | 1 | 1 | 1 | 1 |
| NM_004682 | 1 | 0 | 1 | 1 | 0 | 0 |
| NM_004683 | 0 | 0 | 0 | 0 | 0 | 1 |
| NM_004685 | 1 | 1 | 1 | 1 | 0 | 1 |
| NM_004687 | 1 | 0 | 1 | 0 | 0 | 0 |
| NM_004688 | 1 | 1 | 1 | 1 | 1 | 1 |
| NM_004689 | 1 | 1 | 1 | 1 | 0 | 0 |
| NM_004690 | 1 | 0 | 1 | 0 | 0 | 0 |
| NM_004691 | 1 | 0 | 1 | 1 | 0 | 0 |
| NM_004693 | 1 | 0 | 1 | 1 | 0 | 0 |
| NM_004694 | 1 | 1 | 1 | 1 | 0 | 1 |
| NM_004695 | 1 | 0 | 1 | 0 | 0 | 1 |
| NM_004696 | 1 | 1 | 1 | 0 | 0 | 1 |
| NM_004697 | 1 | 0 | 1 | 0 | 1 | 1 |
| NM_004698 | 1 | 0 | 1 | 0 | 0 | 1 |
| NM_004699 | 1 | 1 | 1 | 0 | 0 | 0 |
| NM_004701 | 1 | 0 | 1 | 0 | 1 | 1 |
| NM_004702 | 1 | 1 | 1 | 0 | 1 | 1 |
| NM_004703 | 1 | 0 | 1 | 0 | 0 | 0 |
| NM_004704 | 1 | 0 | 1 | 0 | 0 | 0 |
| NM_004705 | 1 | 0 | 1 | 0 | 1 | 1 |
| NM_004706 | 1 | 0 | 1 | 1 | 0 | 0 |
| NM_004707 | 1 | 0 | 1 | 0 | 1 | 0 |
| NM_004708 | 1 | 1 | 1 | 1 | 0 | 0 |
| NM_004710 | 1 | 1 | 1 | 1 | 1 | 1 |
| NM_004711 | 1 | 1 | 1 | 1 | 1 | 0 |
| NM_004712 | 1 | 0 | 1 | 1 | 0 | 0 |
| NM_004713 | 1 | 0 | 1 | 0 | 0 | 0 |
| NM_004716 | 1 | 0 | 1 | 0 | 0 | 0 |
| NM_004717 | 1 | 0 | 1 | 0 | 0 | 0 |
| NM_004718 | 1 | 0 | 1 | 1 | 0 | 0 |

|           |   |   |   |   |   |   |
|-----------|---|---|---|---|---|---|
| NM_004719 | 1 | 1 | 1 | 1 | 0 | 0 |
| NM_004720 | 1 | 1 | 1 | 1 | 0 | 0 |
| NM_004721 | 0 | 0 | 1 | 0 | 0 | 1 |
| NM_004722 | 1 | 0 | 1 | 0 | 0 | 1 |
| NM_004723 | 1 | 0 | 1 | 1 | 1 | 1 |
| NM_004724 | 1 | 0 | 1 | 0 | 0 | 0 |
| NM_004725 | 1 | 0 | 1 | 0 | 0 | 0 |
| NM_004726 | 1 | 1 | 1 | 1 | 0 | 0 |
| NM_004727 | 1 | 1 | 1 | 1 | 1 | 1 |
| NM_004728 | 1 | 1 | 1 | 1 | 0 | 0 |
| NM_004729 | 1 | 1 | 1 | 1 | 0 | 0 |
| NM_004730 | 1 | 1 | 1 | 1 | 1 | 0 |
| NM_004731 | 1 | 0 | 1 | 1 | 0 | 0 |
| NM_004732 | 1 | 0 | 1 | 0 | 0 | 0 |
| NM_004733 | 1 | 1 | 1 | 1 | 0 | 0 |
| NM_004735 | 1 | 1 | 1 | 1 | 0 | 0 |
| NM_004736 | 1 | 1 | 1 | 1 | 0 | 0 |
| NM_004737 | 1 | 1 | 1 | 1 | 0 | 0 |
| NM_004738 | 1 | 1 | 1 | 0 | 0 | 0 |
| NM_004739 | 1 | 1 | 1 | 1 | 0 | 1 |
| NM_004740 | 1 | 1 | 1 | 0 | 1 | 1 |
| NM_004741 | 1 | 1 | 1 | 1 | 0 | 0 |
| NM_004746 | 1 | 0 | 1 | 0 | 0 | 0 |
| NM_004747 | 1 | 0 | 1 | 1 | 1 | 1 |
| NM_004748 | 1 | 1 | 1 | 1 | 0 | 0 |
| NM_004749 | 1 | 1 | 1 | 1 | 0 | 1 |
| NM_004750 | 1 | 0 | 1 | 0 | 0 | 0 |
| NM_004751 | 1 | 0 | 1 | 0 | 1 | 1 |
| NM_004753 | 1 | 1 | 1 | 1 | 1 | 1 |
| NM_004755 | 1 | 1 | 1 | 1 | 0 | 1 |
| NM_004756 | 1 | 1 | 1 | 1 | 0 | 0 |
| NM_004757 | 1 | 0 | 1 | 1 | 1 | 0 |
| NM_004758 | 1 | 0 | 1 | 1 | 1 | 1 |
| NM_004759 | 1 | 0 | 1 | 1 | 0 | 0 |
| NM_004760 | 1 | 1 | 1 | 1 | 0 | 0 |
| NM_004761 | 1 | 1 | 1 | 1 | 0 | 1 |
| NM_004762 | 1 | 0 | 1 | 0 | 1 | 0 |
| NM_004763 | 1 | 0 | 1 | 0 | 0 | 1 |
| NM_004765 | 1 | 0 | 1 | 0 | 0 | 0 |
| NM_004766 | 1 | 0 | 1 | 0 | 1 | 1 |
| NM_004767 | 1 | 0 | 1 | 1 | 0 | 0 |
| NM_004768 | 1 | 0 | 1 | 1 | 1 | 0 |
| NM_004771 | 0 | 0 | 0 | 1 | 0 | 0 |
| NM_004772 | 1 | 1 | 1 | 1 | 0 | 0 |
| NM_004773 | 1 | 0 | 1 | 1 | 0 | 0 |
| NM_004774 | 1 | 0 | 1 | 0 | 0 | 0 |
| NM_004775 | 1 | 0 | 1 | 0 | 0 | 0 |
| NM_004776 | 1 | 1 | 1 | 1 | 0 | 0 |
| NM_004778 | 1 | 1 | 1 | 1 | 1 | 1 |
| NM_004779 | 1 | 0 | 1 | 0 | 0 | 0 |
| NM_004780 | 1 | 0 | 1 | 1 | 1 | 0 |
| NM_004781 | 1 | 0 | 1 | 1 | 1 | 1 |



|           |   |   |   |   |   |   |
|-----------|---|---|---|---|---|---|
| NM_004782 | 1 | 0 | 1 | 1 | 1 | 0 |
| NM_004783 | 1 | 0 | 1 | 0 | 0 | 0 |
| NM_004784 | 0 | 0 | 0 | 1 | 0 | 0 |
| NM_004785 | 1 | 0 | 1 | 1 | 0 | 0 |
| NM_004786 | 1 | 0 | 1 | 1 | 0 | 1 |
| NM_004787 | 0 | 0 | 0 | 1 | 0 | 0 |
| NM_004788 | 1 | 0 | 1 | 0 | 0 | 0 |
| NM_004790 | 1 | 0 | 1 | 0 | 0 | 0 |
| NM_004791 | 0 | 0 | 0 | 0 | 0 | 1 |
| NM_004792 | 1 | 0 | 1 | 0 | 0 | 0 |
| NM_004793 | 1 | 1 | 1 | 1 | 0 | 0 |
| NM_004794 | 1 | 0 | 1 | 0 | 0 | 0 |
| NM_004795 | 1 | 1 | 1 | 1 | 1 | 0 |
| NM_004796 | 1 | 0 | 0 | 0 | 0 | 0 |
| NM_004798 | 1 | 1 | 1 | 1 | 0 | 0 |
| NM_004799 | 1 | 1 | 1 | 1 | 0 | 0 |
| NM_004800 | 1 | 1 | 1 | 1 | 0 | 1 |
| NM_004801 | 1 | 0 | 1 | 0 | 0 | 1 |
| NM_004802 | 1 | 1 | 1 | 1 | 1 | 1 |
| NM_004803 | 1 | 0 | 0 | 0 | 0 | 0 |
| NM_004804 | 1 | 0 | 1 | 0 | 0 | 0 |
| NM_004805 | 1 | 1 | 1 | 1 | 0 | 0 |
| NM_004807 | 1 | 0 | 1 | 1 | 1 | 0 |
| NM_004808 | 1 | 1 | 1 | 1 | 1 | 1 |
| NM_004809 | 1 | 1 | 1 | 1 | 1 | 1 |
| NM_004810 | 1 | 0 | 1 | 0 | 0 | 0 |
| NM_004811 | 1 | 0 | 1 | 1 | 0 | 1 |
| NM_004812 | 0 | 0 | 1 | 0 | 0 | 0 |
| NM_004813 | 1 | 0 | 1 | 0 | 0 | 0 |
| NM_004814 | 1 | 0 | 1 | 0 | 0 | 0 |
| NM_004815 | 1 | 1 | 1 | 1 | 0 | 0 |
| NM_004816 | 1 | 0 | 1 | 0 | 0 | 0 |
| NM_004817 | 1 | 1 | 1 | 1 | 0 | 0 |
| NM_004818 | 1 | 0 | 1 | 0 | 0 | 0 |
| NM_004819 | 1 | 0 | 1 | 0 | 0 | 0 |
| NM_004820 | 1 | 0 | 1 | 0 | 0 | 0 |
| NM_004821 | 1 | 1 | 1 | 1 | 1 | 1 |
| NM_004822 | 1 | 0 | 1 | 0 | 0 | 0 |
| NM_004823 | 1 | 1 | 1 | 1 | 0 | 0 |
| NM_004824 | 1 | 0 | 1 | 1 | 0 | 0 |
| NM_004825 | 1 | 0 | 1 | 0 | 0 | 0 |
| NM_004826 | 1 | 1 | 1 | 1 | 0 | 0 |
| NM_004827 | 0 | 0 | 1 | 0 | 0 | 1 |
| NM_004828 | 0 | 0 | 1 | 0 | 0 | 0 |
| NM_004829 | 1 | 1 | 1 | 0 | 0 | 0 |
| NM_004830 | 1 | 1 | 1 | 0 | 0 | 0 |
| NM_004831 | 1 | 0 | 1 | 0 | 0 | 1 |
| NM_004832 | 1 | 1 | 1 | 1 | 1 | 1 |
| NM_004833 | 1 | 1 | 1 | 1 | 1 | 1 |
| NM_004834 | 1 | 0 | 1 | 1 | 1 | 1 |
| NM_004835 | 1 | 1 | 1 | 1 | 0 | 0 |
| NM_004836 | 1 | 0 | 1 | 0 | 1 | 1 |

|           |   |   |   |   |   |   |
|-----------|---|---|---|---|---|---|
| NM_004837 | 1 | 0 | 1 | 0 | 0 | 0 |
| NM_004838 | 1 | 0 | 1 | 1 | 1 | 1 |
| NM_004839 | 1 | 0 | 1 | 0 | 0 | 0 |
| NM_004840 | 1 | 0 | 1 | 1 | 0 | 0 |
| NM_004841 | 1 | 0 | 1 | 0 | 0 | 0 |
| NM_004843 | 1 | 1 | 1 | 1 | 0 | 1 |
| NM_004844 | 1 | 1 | 1 | 1 | 1 | 1 |
| NM_004845 | 1 | 0 | 1 | 0 | 0 | 0 |
| NM_004846 | 1 | 1 | 1 | 1 | 1 | 1 |
| NM_004847 | 1 | 0 | 1 | 1 | 1 | 1 |
| NM_004848 | 1 | 1 | 1 | 1 | 0 | 0 |
| NM_004849 | 1 | 0 | 1 | 0 | 1 | 1 |
| NM_004850 | 1 | 0 | 1 | 0 | 1 | 1 |
| NM_004851 | 1 | 1 | 1 | 0 | 0 | 0 |
| NM_004852 | 1 | 0 | 0 | 0 | 0 | 0 |
| NM_004853 | 1 | 1 | 1 | 1 | 0 | 0 |
| NM_004854 | 1 | 1 | 1 | 1 | 0 | 0 |
| NM_004855 | 1 | 1 | 1 | 1 | 0 | 0 |
| NM_004856 | 1 | 1 | 1 | 1 | 0 | 0 |
| NM_004857 | 1 | 1 | 1 | 1 | 0 | 0 |
| NM_004858 | 1 | 0 | 1 | 0 | 0 | 0 |
| NM_004859 | 1 | 1 | 1 | 1 | 0 | 0 |
| NM_004860 | 1 | 0 | 1 | 0 | 1 | 0 |
| NM_004861 | 1 | 0 | 1 | 0 | 1 | 0 |
| NM_004862 | 1 | 0 | 0 | 0 | 0 | 0 |
| NM_004863 | 1 | 1 | 1 | 1 | 0 | 1 |
| NM_004864 | 1 | 0 | 1 | 1 | 0 | 0 |
| NM_004865 | 1 | 0 | 1 | 1 | 0 | 0 |
| NM_004866 | 1 | 1 | 1 | 0 | 0 | 0 |
| NM_004867 | 1 | 0 | 1 | 1 | 0 | 1 |
| NM_004868 | 1 | 0 | 1 | 0 | 0 | 1 |
| NM_004869 | 1 | 1 | 1 | 1 | 0 | 0 |
| NM_004870 | 1 | 1 | 1 | 1 | 0 | 0 |
| NM_004871 | 1 | 0 | 1 | 0 | 0 | 0 |
| NM_004872 | 1 | 1 | 1 | 1 | 0 | 1 |
| NM_004873 | 1 | 0 | 1 | 0 | 0 | 1 |
| NM_004874 | 1 | 0 | 0 | 0 | 0 | 0 |
| NM_004875 | 1 | 0 | 1 | 1 | 1 | 1 |
| NM_004876 | 1 | 0 | 1 | 0 | 0 | 0 |
| NM_004877 | 1 | 0 | 1 | 0 | 1 | 1 |
| NM_004878 | 1 | 1 | 1 | 1 | 1 | 1 |
| NM_004879 | 1 | 1 | 1 | 1 | 0 | 0 |
| NM_004881 | 1 | 1 | 1 | 0 | 1 | 1 |
| NM_004882 | 1 | 1 | 1 | 1 | 1 | 1 |
| NM_004883 | 1 | 0 | 1 | 0 | 1 | 1 |
| NM_004884 | 1 | 0 | 1 | 0 | 0 | 0 |
| NM_004885 | 1 | 0 | 1 | 0 | 0 | 0 |
| NM_004886 | 1 | 0 | 1 | 0 | 0 | 0 |
| NM_004888 | 1 | 0 | 1 | 0 | 0 | 1 |
| NM_004889 | 1 | 1 | 1 | 1 | 1 | 1 |
| NM_004890 | 1 | 0 | 1 | 0 | 0 | 1 |
| NM_004891 | 1 | 1 | 1 | 0 | 1 | 1 |

|           |   |   |   |   |   |   |
|-----------|---|---|---|---|---|---|
| NM_004892 | 1 | 1 | 1 | 1 | 1 | 1 |
| NM_004893 | 1 | 1 | 1 | 1 | 0 | 1 |
| NM_004894 | 1 | 1 | 1 | 0 | 1 | 0 |
| NM_004895 | 1 | 1 | 1 | 1 | 1 | 1 |
| NM_004896 | 1 | 0 | 1 | 0 | 0 | 0 |
| NM_004897 | 1 | 0 | 1 | 1 | 0 | 1 |
| NM_004898 | 1 | 0 | 1 | 0 | 0 | 0 |
| NM_004899 | 1 | 1 | 1 | 1 | 0 | 0 |
| NM_004900 | 1 | 1 | 1 | 1 | 1 | 1 |
| NM_004901 | 1 | 0 | 1 | 0 | 0 | 0 |
| NM_004902 | 1 | 0 | 1 | 0 | 1 | 1 |
| NM_004905 | 1 | 0 | 1 | 0 | 1 | 0 |
| NM_004906 | 1 | 0 | 1 | 0 | 0 | 1 |
| NM_004907 | 1 | 0 | 1 | 0 | 1 | 1 |
| NM_004908 | 1 | 0 | 1 | 0 | 0 | 0 |
| NM_004909 | 1 | 0 | 0 | 0 | 0 | 1 |
| NM_004910 | 1 | 0 | 1 | 0 | 0 | 1 |
| NM_004911 | 1 | 0 | 1 | 0 | 0 | 0 |
| NM_004913 | 1 | 0 | 1 | 0 | 0 | 1 |
| NM_004914 | 1 | 1 | 1 | 1 | 0 | 1 |
| NM_004915 | 1 | 1 | 1 | 1 | 1 | 1 |
| NM_004917 | 1 | 0 | 1 | 1 | 0 | 0 |
| NM_004918 | 1 | 0 | 1 | 1 | 0 | 1 |
| NM_004920 | 1 | 1 | 1 | 1 | 0 | 1 |
| NM_004921 | 1 | 0 | 1 | 0 | 0 | 0 |
| NM_004922 | 1 | 0 | 1 | 0 | 0 | 0 |
| NM_004923 | 1 | 0 | 1 | 0 | 1 | 1 |
| NM_004924 | 1 | 1 | 1 | 1 | 0 | 0 |
| NM_004925 | 1 | 0 | 1 | 0 | 0 | 0 |
| NM_004926 | 1 | 1 | 1 | 1 | 0 | 0 |
| NM_004927 | 1 | 0 | 1 | 0 | 0 | 1 |
| NM_004928 | 1 | 0 | 1 | 1 | 0 | 1 |
| NM_004929 | 0 | 0 | 1 | 0 | 0 | 0 |
| NM_004930 | 1 | 0 | 1 | 1 | 0 | 0 |
| NM_004931 | 1 | 1 | 1 | 1 | 0 | 1 |
| NM_004933 | 1 | 0 | 1 | 0 | 0 | 0 |
| NM_004934 | 1 | 0 | 1 | 0 | 0 | 1 |
| NM_004935 | 1 | 0 | 1 | 0 | 0 | 0 |
| NM_004937 | 1 | 1 | 1 | 1 | 0 | 0 |
| NM_004938 | 1 | 1 | 1 | 1 | 0 | 0 |
| NM_004939 | 1 | 0 | 1 | 1 | 0 | 1 |
| NM_004941 | 1 | 1 | 1 | 1 | 0 | 0 |
| NM_004942 | 1 | 1 | 1 | 1 | 0 | 1 |
| NM_004944 | 1 | 1 | 1 | 1 | 1 | 1 |
| NM_004945 | 1 | 0 | 1 | 0 | 0 | 1 |
| NM_004946 | 1 | 0 | 1 | 0 | 0 | 0 |
| NM_004947 | 1 | 0 | 1 | 0 | 0 | 0 |
| NM_004948 | 1 | 1 | 1 | 1 | 1 | 1 |
| NM_004949 | 1 | 0 | 1 | 0 | 0 | 0 |
| NM_004950 | 1 | 0 | 0 | 0 | 0 | 1 |
| NM_004951 | 1 | 0 | 1 | 1 | 0 | 1 |
| NM_004952 | 1 | 0 | 1 | 0 | 0 | 0 |

|           |   |   |   |   |   |   |
|-----------|---|---|---|---|---|---|
| NM_004953 | 1 | 1 | 1 | 1 | 1 | 0 |
| NM_004954 | 1 | 0 | 1 | 1 | 1 | 1 |
| NM_004955 | 1 | 1 | 1 | 1 | 1 | 1 |
| NM_004956 | 1 | 0 | 0 | 0 | 0 | 0 |
| NM_004957 | 1 | 0 | 1 | 0 | 0 | 1 |
| NM_004958 | 1 | 0 | 1 | 1 | 1 | 1 |
| NM_004959 | 1 | 1 | 1 | 0 | 0 | 0 |
| NM_004960 | 1 | 1 | 1 | 1 | 1 | 1 |
| NM_004961 | 1 | 0 | 0 | 0 | 0 | 1 |
| NM_004962 | 1 | 0 | 1 | 0 | 0 | 0 |
| NM_004963 | 1 | 0 | 1 | 0 | 0 | 0 |
| NM_004964 | 1 | 0 | 1 | 0 | 0 | 1 |
| NM_004965 | 1 | 1 | 1 | 1 | 1 | 1 |
| NM_004966 | 1 | 1 | 1 | 0 | 0 | 1 |
| NM_004968 | 1 | 1 | 1 | 1 | 0 | 1 |
| NM_004969 | 1 | 1 | 1 | 1 | 1 | 1 |
| NM_004970 | 1 | 1 | 1 | 1 | 0 | 0 |
| NM_004972 | 1 | 1 | 1 | 1 | 1 | 1 |
| NM_004973 | 1 | 1 | 1 | 1 | 0 | 0 |
| NM_004974 | 1 | 0 | 1 | 0 | 0 | 1 |
| NM_004975 | 1 | 0 | 0 | 0 | 0 | 1 |
| NM_004976 | 0 | 0 | 1 | 0 | 0 | 0 |
| NM_004977 | 1 | 0 | 1 | 0 | 0 | 0 |
| NM_004978 | 1 | 0 | 1 | 0 | 0 | 0 |
| NM_004979 | 1 | 1 | 1 | 1 | 0 | 0 |
| NM_004980 | 1 | 0 | 0 | 0 | 0 | 0 |
| NM_004981 | 1 | 0 | 1 | 0 | 0 | 1 |
| NM_004982 | 1 | 0 | 0 | 0 | 0 | 1 |
| NM_004985 | 1 | 0 | 1 | 1 | 0 | 1 |
| NM_004986 | 1 | 0 | 1 | 1 | 0 | 1 |
| NM_004987 | 1 | 0 | 1 | 1 | 0 | 0 |
| NM_004988 | 0 | 0 | 0 | 0 | 0 | 1 |
| NM_004990 | 1 | 0 | 1 | 0 | 1 | 1 |
| NM_004991 | 1 | 1 | 1 | 1 | 0 | 1 |
| NM_004992 | 1 | 0 | 1 | 1 | 0 | 0 |
| NM_004993 | 1 | 1 | 1 | 1 | 0 | 0 |
| NM_004994 | 1 | 1 | 1 | 1 | 1 | 1 |
| NM_004995 | 1 | 1 | 1 | 1 | 1 | 0 |
| NM_004997 | 1 | 1 | 1 | 1 | 0 | 0 |
| NM_004998 | 1 | 1 | 1 | 1 | 0 | 1 |
| NM_004999 | 1 | 1 | 1 | 1 | 1 | 1 |
| NM_005000 | 1 | 0 | 1 | 0 | 1 | 1 |
| NM_005001 | 1 | 1 | 1 | 1 | 0 | 1 |
| NM_005002 | 1 | 0 | 1 | 0 | 0 | 1 |
| NM_005003 | 1 | 1 | 1 | 1 | 0 | 1 |
| NM_005004 | 1 | 1 | 1 | 1 | 0 | 0 |
| NM_005005 | 1 | 1 | 1 | 1 | 0 | 1 |
| NM_005006 | 1 | 0 | 1 | 0 | 0 | 0 |
| NM_005007 | 1 | 0 | 1 | 1 | 0 | 1 |
| NM_005008 | 1 | 0 | 1 | 1 | 0 | 0 |
| NM_005009 | 1 | 1 | 1 | 1 | 0 | 1 |
| NM_005010 | 1 | 1 | 1 | 1 | 1 | 0 |

|           |   |   |   |   |   |   |
|-----------|---|---|---|---|---|---|
| NM_005011 | 1 | 0 | 1 | 0 | 0 | 0 |
| NM_005012 | 1 | 0 | 1 | 0 | 0 | 1 |
| NM_005013 | 1 | 1 | 1 | 1 | 0 | 1 |
| NM_005015 | 1 | 1 | 1 | 1 | 1 | 1 |
| NM_005016 | 1 | 0 | 1 | 1 | 0 | 0 |
| NM_005017 | 1 | 0 | 1 | 1 | 1 | 0 |
| NM_005018 | 1 | 0 | 1 | 1 | 1 | 1 |
| NM_005021 | 1 | 1 | 1 | 1 | 0 | 0 |
| NM_005022 | 1 | 1 | 1 | 1 | 0 | 0 |
| NM_005023 | 1 | 0 | 1 | 0 | 0 | 0 |
| NM_005024 | 1 | 0 | 1 | 1 | 0 | 0 |
| NM_005025 | 1 | 1 | 1 | 1 | 1 | 0 |
| NM_005026 | 1 | 0 | 1 | 1 | 0 | 0 |
| NM_005027 | 1 | 0 | 1 | 0 | 0 | 0 |
| NM_005028 | 1 | 0 | 1 | 0 | 0 | 1 |
| NM_005029 | 1 | 0 | 1 | 1 | 1 | 1 |
| NM_005030 | 1 | 0 | 1 | 0 | 1 | 1 |
| NM_005031 | 1 | 0 | 1 | 0 | 0 | 0 |
| NM_005032 | 1 | 0 | 1 | 1 | 0 | 1 |
| NM_005033 | 1 | 0 | 1 | 0 | 1 | 1 |
| NM_005034 | 1 | 0 | 1 | 0 | 0 | 0 |
| NM_005035 | 1 | 1 | 1 | 1 | 1 | 1 |
| NM_005036 | 1 | 0 | 1 | 0 | 0 | 0 |
| NM_005037 | 1 | 1 | 1 | 1 | 1 | 1 |
| NM_005038 | 1 | 0 | 1 | 1 | 0 | 0 |
| NM_005039 | 1 | 0 | 1 | 0 | 0 | 1 |
| NM_005040 | 1 | 0 | 1 | 1 | 1 | 1 |
| NM_005041 | 1 | 0 | 1 | 0 | 0 | 0 |
| NM_005042 | 1 | 1 | 1 | 0 | 0 | 1 |
| NM_005044 | 1 | 1 | 1 | 1 | 0 | 0 |
| NM_005046 | 1 | 0 | 1 | 1 | 0 | 0 |
| NM_005047 | 1 | 0 | 1 | 0 | 1 | 1 |
| NM_005048 | 1 | 0 | 1 | 0 | 0 | 0 |
| NM_005049 | 1 | 1 | 1 | 1 | 1 | 1 |
| NM_005050 | 1 | 0 | 1 | 0 | 0 | 0 |
| NM_005051 | 1 | 1 | 1 | 1 | 1 | 1 |
| NM_005052 | 1 | 1 | 1 | 1 | 0 | 1 |
| NM_005053 | 1 | 1 | 1 | 1 | 0 | 1 |
| NM_005054 | 1 | 0 | 1 | 0 | 1 | 1 |
| NM_005055 | 1 | 0 | 1 | 1 | 0 | 0 |
| NM_005056 | 1 | 0 | 1 | 1 | 0 | 0 |
| NM_005057 | 1 | 0 | 1 | 0 | 0 | 0 |
| NM_005058 | 1 | 0 | 1 | 0 | 0 | 0 |
| NM_005060 | 1 | 0 | 1 | 1 | 0 | 0 |
| NM_005061 | 1 | 0 | 1 | 1 | 1 | 1 |
| NM_005063 | 1 | 1 | 1 | 1 | 0 | 1 |
| NM_005065 | 1 | 0 | 1 | 1 | 0 | 0 |
| NM_005066 | 1 | 1 | 1 | 1 | 0 | 0 |
| NM_005067 | 1 | 0 | 1 | 1 | 1 | 1 |
| NM_005068 | 1 | 0 | 1 | 1 | 0 | 0 |
| NM_005069 | 0 | 0 | 0 | 0 | 0 | 1 |
| NM_005070 | 1 | 0 | 1 | 0 | 1 | 0 |

|           |   |   |   |   |   |   |
|-----------|---|---|---|---|---|---|
| NM_005071 | 1 | 0 | 0 | 0 | 0 | 1 |
| NM_005072 | 1 | 1 | 1 | 0 | 1 | 1 |
| NM_005073 | 0 | 0 | 1 | 0 | 0 | 0 |
| NM_005075 | 1 | 0 | 1 | 0 | 0 | 0 |
| NM_005076 | 1 | 0 | 0 | 0 | 0 | 1 |
| NM_005077 | 1 | 1 | 1 | 1 | 0 | 1 |
| NM_005078 | 1 | 1 | 1 | 1 | 0 | 1 |
| NM_005079 | 1 | 0 | 1 | 1 | 0 | 0 |
| NM_005080 | 1 | 1 | 1 | 1 | 1 | 0 |
| NM_005081 | 1 | 0 | 1 | 0 | 0 | 0 |
| NM_005082 | 1 | 0 | 1 | 0 | 1 | 1 |
| NM_005083 | 1 | 0 | 1 | 0 | 0 | 1 |
| NM_005084 | 1 | 1 | 1 | 1 | 0 | 0 |
| NM_005085 | 1 | 1 | 1 | 1 | 1 | 1 |
| NM_005086 | 1 | 0 | 1 | 0 | 0 | 0 |
| NM_005087 | 1 | 1 | 1 | 1 | 0 | 1 |
| NM_005088 | 1 | 0 | 1 | 0 | 0 | 1 |
| NM_005089 | 1 | 0 | 1 | 0 | 0 | 0 |
| NM_005090 | 1 | 0 | 1 | 0 | 1 | 1 |
| NM_005091 | 1 | 1 | 1 | 1 | 1 | 1 |
| NM_005092 | 1 | 0 | 1 | 0 | 0 | 0 |
| NM_005093 | 1 | 0 | 1 | 1 | 1 | 1 |
| NM_005094 | 1 | 1 | 1 | 1 | 1 | 1 |
| NM_005095 | 1 | 1 | 1 | 1 | 0 | 1 |
| NM_005096 | 1 | 1 | 1 | 1 | 0 | 1 |
| NM_005097 | 0 | 0 | 1 | 0 | 0 | 0 |
| NM_005098 | 1 | 0 | 1 | 0 | 0 | 0 |
| NM_005099 | 1 | 0 | 1 | 0 | 0 | 0 |
| NM_005100 | 1 | 0 | 1 | 1 | 0 | 0 |
| NM_005101 | 1 | 0 | 1 | 0 | 1 | 1 |
| NM_005102 | 1 | 1 | 1 | 1 | 0 | 0 |
| NM_005103 | 1 | 1 | 1 | 1 | 0 | 0 |
| NM_005104 | 1 | 1 | 1 | 0 | 1 | 0 |
| NM_005105 | 1 | 0 | 1 | 0 | 0 | 0 |
| NM_005106 | 1 | 1 | 1 | 1 | 1 | 1 |
| NM_005107 | 1 | 0 | 1 | 0 | 1 | 0 |
| NM_005108 | 0 | 0 | 0 | 0 | 0 | 1 |
| NM_005109 | 1 | 0 | 1 | 0 | 0 | 1 |
| NM_005112 | 1 | 0 | 1 | 0 | 0 | 0 |
| NM_005113 | 1 | 0 | 1 | 0 | 0 | 0 |
| NM_005114 | 1 | 1 | 1 | 0 | 0 | 1 |
| NM_005115 | 1 | 0 | 1 | 1 | 1 | 1 |
| NM_005116 | 1 | 0 | 1 | 0 | 0 | 0 |
| NM_005117 | 1 | 0 | 1 | 0 | 0 | 0 |
| NM_005118 | 1 | 0 | 1 | 0 | 0 | 0 |
| NM_005119 | 1 | 1 | 1 | 1 | 0 | 0 |
| NM_005120 | 1 | 0 | 1 | 0 | 0 | 0 |
| NM_005121 | 1 | 0 | 1 | 1 | 0 | 0 |
| NM_005122 | 1 | 0 | 1 | 0 | 0 | 0 |
| NM_005124 | 1 | 0 | 1 | 0 | 0 | 0 |
| NM_005125 | 1 | 0 | 1 | 0 | 0 | 1 |
| NM_005126 | 1 | 1 | 1 | 1 | 1 | 1 |

|           |   |   |   |   |   |   |
|-----------|---|---|---|---|---|---|
| NM_005127 | 1 | 1 | 1 | 1 | 1 | 1 |
| NM_005128 | 1 | 0 | 1 | 1 | 0 | 1 |
| NM_005130 | 1 | 1 | 1 | 0 | 0 | 1 |
| NM_005131 | 1 | 0 | 1 | 1 | 1 | 1 |
| NM_005132 | 1 | 0 | 1 | 0 | 1 | 1 |
| NM_005133 | 1 | 1 | 1 | 1 | 0 | 0 |
| NM_005134 | 1 | 1 | 1 | 1 | 1 | 1 |
| NM_005135 | 1 | 0 | 1 | 1 | 1 | 1 |
| NM_005136 | 1 | 0 | 1 | 0 | 0 | 0 |
| NM_005137 | 1 | 0 | 1 | 1 | 1 | 1 |
| NM_005138 | 1 | 0 | 1 | 0 | 1 | 1 |
| NM_005139 | 1 | 1 | 1 | 1 | 1 | 1 |
| NM_005141 | 0 | 0 | 1 | 0 | 0 | 0 |
| NM_005142 | 0 | 0 | 1 | 0 | 0 | 0 |
| NM_005143 | 1 | 1 | 1 | 1 | 1 | 1 |
| NM_005144 | 1 | 1 | 1 | 0 | 0 | 1 |
| NM_005145 | 1 | 1 | 1 | 1 | 0 | 1 |
| NM_005146 | 1 | 0 | 1 | 0 | 0 | 0 |
| NM_005147 | 1 | 1 | 1 | 1 | 0 | 0 |
| NM_005148 | 1 | 0 | 1 | 1 | 1 | 1 |
| NM_005149 | 1 | 1 | 1 | 0 | 0 | 0 |
| NM_005151 | 1 | 0 | 1 | 1 | 1 | 1 |
| NM_005153 | 1 | 1 | 1 | 1 | 0 | 1 |
| NM_005154 | 1 | 0 | 1 | 0 | 0 | 0 |
| NM_005156 | 1 | 0 | 1 | 1 | 1 | 1 |
| NM_005157 | 1 | 0 | 1 | 1 | 1 | 0 |
| NM_005158 | 1 | 0 | 1 | 1 | 0 | 0 |
| NM_005159 | 0 | 0 | 0 | 0 | 0 | 1 |
| NM_005160 | 1 | 1 | 1 | 1 | 0 | 0 |
| NM_005161 | 1 | 1 | 1 | 1 | 0 | 0 |
| NM_005162 | 1 | 1 | 0 | 0 | 0 | 1 |
| NM_005163 | 1 | 1 | 1 | 1 | 1 | 1 |
| NM_005164 | 1 | 1 | 1 | 1 | 0 | 0 |
| NM_005165 | 1 | 1 | 1 | 1 | 0 | 1 |
| NM_005166 | 1 | 0 | 1 | 1 | 1 | 1 |
| NM_005167 | 1 | 1 | 1 | 1 | 1 | 1 |
| NM_005168 | 1 | 0 | 1 | 0 | 0 | 1 |
| NM_005169 | 1 | 0 | 0 | 0 | 0 | 0 |
| NM_005170 | 1 | 0 | 1 | 0 | 0 | 0 |
| NM_005171 | 1 | 0 | 1 | 0 | 0 | 1 |
| NM_005172 | 1 | 0 | 1 | 0 | 0 | 0 |
| NM_005173 | 1 | 0 | 1 | 0 | 0 | 0 |
| NM_005174 | 1 | 1 | 1 | 1 | 1 | 1 |
| NM_005175 | 1 | 1 | 1 | 1 | 0 | 1 |
| NM_005176 | 1 | 1 | 1 | 1 | 0 | 0 |
| NM_005177 | 1 | 1 | 1 | 0 | 0 | 1 |
| NM_005178 | 1 | 1 | 1 | 1 | 1 | 1 |
| NM_005180 | 1 | 0 | 1 | 0 | 0 | 0 |
| NM_005181 | 1 | 0 | 1 | 0 | 1 | 1 |
| NM_005182 | 1 | 0 | 0 | 0 | 0 | 1 |
| NM_005183 | 1 | 0 | 1 | 0 | 0 | 0 |
| NM_005184 | 1 | 0 | 1 | 0 | 0 | 1 |

|           |   |   |   |   |   |   |
|-----------|---|---|---|---|---|---|
| NM_005185 | 1 | 0 | 1 | 0 | 0 | 0 |
| NM_005186 | 1 | 0 | 1 | 0 | 1 | 0 |
| NM_005187 | 1 | 1 | 1 | 1 | 1 | 1 |
| NM_005188 | 1 | 1 | 1 | 0 | 0 | 1 |
| NM_005190 | 1 | 0 | 1 | 0 | 0 | 0 |
| NM_005191 | 1 | 0 | 1 | 0 | 0 | 1 |
| NM_005192 | 1 | 1 | 1 | 0 | 0 | 1 |
| NM_005193 | 0 | 0 | 1 | 0 | 0 | 0 |
| NM_005195 | 1 | 1 | 1 | 1 | 1 | 1 |
| NM_005197 | 1 | 0 | 1 | 0 | 0 | 1 |
| NM_005198 | 1 | 0 | 1 | 0 | 0 | 0 |
| NM_005199 | 1 | 1 | 1 | 1 | 0 | 0 |
| NM_005200 | 1 | 0 | 1 | 1 | 0 | 0 |
| NM_005202 | 1 | 1 | 1 | 1 | 1 | 1 |
| NM_005203 | 1 | 0 | 1 | 1 | 0 | 0 |
| NM_005204 | 1 | 0 | 1 | 0 | 0 | 1 |
| NM_005205 | 1 | 1 | 1 | 1 | 0 | 0 |
| NM_005206 | 1 | 1 | 1 | 1 | 0 | 0 |
| NM_005207 | 1 | 1 | 1 | 1 | 0 | 0 |
| NM_005209 | 1 | 0 | 0 | 0 | 0 | 0 |
| NM_005211 | 1 | 1 | 1 | 1 | 0 | 0 |
| NM_005212 | 1 | 0 | 1 | 1 | 0 | 0 |
| NM_005213 | 1 | 1 | 1 | 1 | 1 | 1 |
| NM_005214 | 1 | 0 | 1 | 0 | 0 | 1 |
| NM_005215 | 0 | 1 | 0 | 0 | 0 | 1 |
| NM_005216 | 1 | 1 | 1 | 1 | 0 | 1 |
| NM_005217 | 1 | 1 | 1 | 1 | 0 | 1 |
| NM_005218 | 1 | 1 | 1 | 1 | 0 | 1 |
| NM_005219 | 1 | 0 | 1 | 0 | 0 | 0 |
| NM_005220 | 1 | 0 | 0 | 0 | 0 | 0 |
| NM_005221 | 1 | 1 | 1 | 0 | 0 | 0 |
| NM_005223 | 1 | 0 | 1 | 0 | 0 | 0 |
| NM_005224 | 1 | 1 | 1 | 1 | 0 | 0 |
| NM_005225 | 1 | 0 | 1 | 0 | 0 | 0 |
| NM_005226 | 1 | 0 | 1 | 0 | 0 | 0 |
| NM_005227 | 1 | 0 | 1 | 1 | 1 | 1 |
| NM_005228 | 1 | 1 | 1 | 1 | 1 | 0 |
| NM_005229 | 1 | 1 | 1 | 1 | 0 | 0 |
| NM_005230 | 0 | 0 | 1 | 0 | 0 | 0 |
| NM_005231 | 1 | 1 | 1 | 1 | 0 | 1 |
| NM_005232 | 1 | 1 | 1 | 1 | 0 | 0 |
| NM_005234 | 1 | 0 | 1 | 0 | 0 | 1 |
| NM_005235 | 0 | 1 | 0 | 1 | 0 | 0 |
| NM_005236 | 1 | 0 | 1 | 1 | 0 | 0 |
| NM_005238 | 1 | 1 | 1 | 1 | 0 | 1 |
| NM_005239 | 1 | 0 | 1 | 0 | 1 | 1 |
| NM_005240 | 1 | 0 | 1 | 0 | 0 | 0 |
| NM_005241 | 1 | 0 | 1 | 1 | 0 | 0 |
| NM_005242 | 1 | 0 | 1 | 0 | 0 | 1 |
| NM_005243 | 1 | 1 | 1 | 1 | 0 | 1 |
| NM_005246 | 1 | 0 | 1 | 0 | 0 | 0 |
| NM_005247 | 1 | 0 | 1 | 0 | 0 | 0 |



|           |   |   |   |   |   |   |
|-----------|---|---|---|---|---|---|
| NM_005248 | 1 | 1 | 1 | 1 | 0 | 1 |
| NM_005250 | 1 | 1 | 1 | 0 | 0 | 0 |
| NM_005251 | 1 | 0 | 1 | 1 | 0 | 0 |
| NM_005252 | 1 | 1 | 1 | 1 | 1 | 1 |
| NM_005253 | 1 | 1 | 1 | 1 | 0 | 0 |
| NM_005254 | 1 | 0 | 1 | 0 | 0 | 1 |
| NM_005255 | 1 | 0 | 1 | 0 | 0 | 0 |
| NM_005257 | 1 | 1 | 1 | 1 | 1 | 1 |
| NM_005258 | 1 | 1 | 1 | 1 | 0 | 1 |
| NM_005259 | 0 | 0 | 1 | 0 | 0 | 0 |
| NM_005260 | 1 | 0 | 1 | 0 | 0 | 0 |
| NM_005261 | 1 | 0 | 1 | 0 | 0 | 1 |
| NM_005262 | 1 | 0 | 1 | 0 | 0 | 0 |
| NM_005263 | 1 | 1 | 1 | 1 | 1 | 1 |
| NM_005267 | 1 | 0 | 1 | 0 | 0 | 0 |
| NM_005269 | 1 | 0 | 1 | 1 | 0 | 0 |
| NM_005271 | 1 | 1 | 1 | 1 | 0 | 0 |
| NM_005272 | 1 | 1 | 1 | 1 | 0 | 1 |
| NM_005273 | 1 | 0 | 1 | 1 | 1 | 1 |
| NM_005274 | 1 | 0 | 1 | 1 | 1 | 1 |
| NM_005275 | 1 | 1 | 1 | 1 | 0 | 0 |
| NM_005276 | 1 | 1 | 1 | 0 | 0 | 1 |
| NM_005277 | 1 | 1 | 1 | 1 | 0 | 1 |
| NM_005278 | 1 | 1 | 1 | 1 | 1 | 1 |
| NM_005279 | 1 | 0 | 0 | 0 | 0 | 1 |
| NM_005281 | 1 | 0 | 1 | 1 | 0 | 0 |
| NM_005282 | 1 | 0 | 1 | 0 | 0 | 0 |
| NM_005283 | 0 | 0 | 0 | 0 | 1 | 1 |
| NM_005284 | 1 | 0 | 1 | 0 | 1 | 0 |
| NM_005285 | 1 | 0 | 1 | 0 | 0 | 0 |
| NM_005288 | 0 | 0 | 1 | 0 | 0 | 0 |
| NM_005290 | 1 | 1 | 1 | 1 | 0 | 0 |
| NM_005291 | 1 | 0 | 1 | 1 | 0 | 0 |
| NM_005292 | 1 | 1 | 1 | 1 | 1 | 1 |
| NM_005293 | 1 | 1 | 1 | 0 | 0 | 0 |
| NM_005294 | 1 | 0 | 0 | 0 | 0 | 1 |
| NM_005295 | 1 | 0 | 1 | 0 | 0 | 1 |
| NM_005296 | 1 | 0 | 1 | 1 | 0 | 1 |
| NM_005297 | 1 | 0 | 1 | 0 | 0 | 1 |
| NM_005298 | 1 | 0 | 0 | 0 | 0 | 0 |
| NM_005299 | 1 | 0 | 1 | 0 | 0 | 0 |
| NM_005300 | 1 | 1 | 1 | 1 | 0 | 0 |
| NM_005301 | 1 | 0 | 1 | 0 | 0 | 1 |
| NM_005304 | 1 | 1 | 1 | 1 | 0 | 0 |
| NM_005305 | 1 | 0 | 1 | 0 | 0 | 1 |
| NM_005306 | 1 | 0 | 1 | 1 | 0 | 0 |
| NM_005307 | 1 | 0 | 1 | 0 | 0 | 0 |
| NM_005308 | 1 | 1 | 1 | 1 | 0 | 0 |
| NM_005310 | 1 | 0 | 1 | 0 | 0 | 1 |
| NM_005311 | 1 | 1 | 1 | 1 | 1 | 0 |
| NM_005312 | 1 | 1 | 1 | 1 | 1 | 1 |
| NM_005313 | 1 | 0 | 1 | 0 | 0 | 1 |

|           |   |   |   |   |   |   |
|-----------|---|---|---|---|---|---|
| NM_005314 | 1 | 0 | 1 | 1 | 1 | 1 |
| NM_005316 | 1 | 0 | 1 | 0 | 0 | 0 |
| NM_005317 | 1 | 0 | 1 | 1 | 1 | 0 |
| NM_005318 | 1 | 0 | 1 | 0 | 0 | 0 |
| NM_005319 | 1 | 1 | 1 | 1 | 1 | 1 |
| NM_005320 | 1 | 0 | 1 | 1 | 1 | 1 |
| NM_005321 | 1 | 0 | 1 | 0 | 0 | 0 |
| NM_005322 | 1 | 0 | 1 | 0 | 0 | 1 |
| NM_005323 | 1 | 0 | 1 | 1 | 0 | 0 |
| NM_005324 | 1 | 1 | 1 | 1 | 0 | 1 |
| NM_005326 | 1 | 0 | 1 | 0 | 1 | 0 |
| NM_005327 | 1 | 0 | 1 | 1 | 1 | 1 |
| NM_005329 | 1 | 0 | 1 | 1 | 1 | 0 |
| NM_005330 | 1 | 0 | 1 | 0 | 0 | 1 |
| NM_005331 | 1 | 0 | 1 | 0 | 0 | 0 |
| NM_005332 | 1 | 0 | 0 | 0 | 0 | 0 |
| NM_005333 | 1 | 1 | 1 | 1 | 0 | 0 |
| NM_005334 | 1 | 1 | 1 | 1 | 0 | 0 |
| NM_005335 | 1 | 1 | 1 | 1 | 0 | 1 |
| NM_005336 | 1 | 1 | 1 | 1 | 0 | 1 |
| NM_005337 | 1 | 0 | 1 | 1 | 1 | 1 |
| NM_005338 | 1 | 0 | 1 | 1 | 1 | 1 |
| NM_005339 | 1 | 0 | 1 | 0 | 0 | 0 |
| NM_005340 | 1 | 1 | 1 | 1 | 0 | 1 |
| NM_005341 | 1 | 0 | 1 | 0 | 0 | 0 |
| NM_005342 | 1 | 1 | 1 | 0 | 0 | 1 |
| NM_005343 | 1 | 0 | 1 | 0 | 0 | 0 |
| NM_005345 | 1 | 1 | 1 | 1 | 1 | 1 |
| NM_005346 | 1 | 0 | 1 | 1 | 1 | 1 |
| NM_005347 | 1 | 1 | 1 | 1 | 0 | 0 |
| NM_005348 | 1 | 0 | 1 | 0 | 0 | 0 |
| NM_005349 | 1 | 1 | 1 | 1 | 0 | 1 |
| NM_005354 | 1 | 1 | 1 | 1 | 0 | 0 |
| NM_005356 | 1 | 0 | 1 | 1 | 0 | 1 |
| NM_005357 | 1 | 1 | 1 | 1 | 0 | 1 |
| NM_005358 | 1 | 1 | 1 | 1 | 1 | 1 |
| NM_005359 | 1 | 0 | 1 | 0 | 0 | 0 |
| NM_005360 | 1 | 0 | 1 | 1 | 0 | 0 |
| NM_005361 | 0 | 0 | 0 | 0 | 0 | 1 |
| NM_005364 | 1 | 0 | 1 | 0 | 0 | 0 |
| NM_005365 | 0 | 0 | 1 | 0 | 0 | 0 |
| NM_005367 | 0 | 0 | 0 | 0 | 0 | 1 |
| NM_005368 | 0 | 0 | 0 | 0 | 0 | 1 |
| NM_005369 | 1 | 0 | 1 | 0 | 0 | 0 |
| NM_005370 | 1 | 0 | 1 | 1 | 0 | 0 |
| NM_005371 | 1 | 0 | 1 | 0 | 0 | 1 |
| NM_005372 | 1 | 0 | 1 | 0 | 0 | 0 |
| NM_005373 | 1 | 0 | 1 | 0 | 0 | 1 |
| NM_005374 | 1 | 0 | 1 | 0 | 0 | 0 |
| NM_005375 | 1 | 1 | 1 | 1 | 0 | 1 |
| NM_005376 | 1 | 0 | 1 | 0 | 0 | 0 |
| NM_005377 | 1 | 1 | 1 | 0 | 0 | 0 |

|           |   |   |   |   |   |   |
|-----------|---|---|---|---|---|---|
| NM_005378 | 1 | 1 | 1 | 1 | 1 | 1 |
| NM_005379 | 1 | 0 | 0 | 0 | 0 | 1 |
| NM_005380 | 1 | 1 | 1 | 1 | 0 | 1 |
| NM_005381 | 1 | 1 | 1 | 1 | 1 | 1 |
| NM_005382 | 1 | 0 | 1 | 0 | 0 | 1 |
| NM_005383 | 1 | 0 | 0 | 0 | 0 | 0 |
| NM_005384 | 1 | 1 | 1 | 1 | 1 | 1 |
| NM_005385 | 1 | 0 | 1 | 1 | 1 | 1 |
| NM_005386 | 1 | 1 | 1 | 1 | 0 | 0 |
| NM_005388 | 1 | 0 | 1 | 0 | 0 | 0 |
| NM_005389 | 1 | 0 | 1 | 0 | 0 | 0 |
| NM_005390 | 1 | 0 | 0 | 0 | 0 | 0 |
| NM_005391 | 1 | 0 | 1 | 1 | 0 | 0 |
| NM_005392 | 1 | 0 | 1 | 0 | 0 | 1 |
| NM_005393 | 1 | 0 | 1 | 0 | 0 | 0 |
| NM_005395 | 1 | 0 | 1 | 0 | 1 | 0 |
| NM_005397 | 1 | 1 | 1 | 1 | 0 | 0 |
| NM_005399 | 1 | 0 | 1 | 0 | 0 | 1 |
| NM_005400 | 0 | 1 | 0 | 0 | 0 | 0 |
| NM_005401 | 0 | 0 | 0 | 0 | 0 | 1 |
| NM_005402 | 1 | 1 | 1 | 1 | 0 | 1 |
| NM_005406 | 1 | 0 | 1 | 1 | 0 | 0 |
| NM_005408 | 0 | 0 | 1 | 0 | 0 | 0 |
| NM_005409 | 1 | 0 | 1 | 0 | 0 | 0 |
| NM_005410 | 1 | 0 | 1 | 1 | 1 | 0 |
| NM_005411 | 1 | 0 | 1 | 0 | 0 | 0 |
| NM_005412 | 1 | 0 | 1 | 1 | 0 | 1 |
| NM_005414 | 1 | 1 | 1 | 1 | 1 | 1 |
| NM_005415 | 1 | 1 | 1 | 1 | 0 | 1 |
| NM_005416 | 1 | 0 | 0 | 0 | 0 | 0 |
| NM_005417 | 1 | 0 | 1 | 1 | 0 | 0 |
| NM_005418 | 1 | 1 | 1 | 1 | 0 | 0 |
| NM_005419 | 1 | 0 | 1 | 0 | 0 | 1 |
| NM_005422 | 1 | 0 | 0 | 0 | 0 | 0 |
| NM_005423 | 1 | 0 | 1 | 1 | 0 | 0 |
| NM_005424 | 1 | 0 | 1 | 1 | 0 | 1 |
| NM_005426 | 1 | 0 | 1 | 0 | 0 | 0 |
| NM_005427 | 1 | 0 | 1 | 1 | 0 | 0 |
| NM_005428 | 1 | 0 | 1 | 1 | 1 | 1 |
| NM_005429 | 1 | 1 | 1 | 0 | 0 | 1 |
| NM_005430 | 1 | 1 | 1 | 1 | 0 | 0 |
| NM_005432 | 1 | 0 | 1 | 1 | 0 | 0 |
| NM_005433 | 1 | 1 | 1 | 1 | 1 | 1 |
| NM_005434 | 1 | 1 | 1 | 1 | 0 | 1 |
| NM_005435 | 1 | 1 | 1 | 1 | 0 | 1 |
| NM_005436 | 1 | 0 | 1 | 1 | 1 | 1 |
| NM_005437 | 0 | 0 | 1 | 0 | 0 | 0 |
| NM_005438 | 1 | 0 | 1 | 0 | 0 | 0 |
| NM_005439 | 1 | 1 | 1 | 1 | 0 | 1 |
| NM_005440 | 0 | 0 | 1 | 0 | 0 | 0 |
| NM_005441 | 1 | 1 | 1 | 0 | 0 | 1 |
| NM_005442 | 1 | 0 | 1 | 1 | 0 | 0 |

|           |   |   |   |   |   |   |
|-----------|---|---|---|---|---|---|
| NM_005443 | 1 | 1 | 1 | 1 | 0 | 0 |
| NM_005444 | 1 | 0 | 1 | 0 | 0 | 1 |
| NM_005445 | 1 | 0 | 1 | 0 | 0 | 0 |
| NM_005446 | 0 | 0 | 0 | 0 | 1 | 0 |
| NM_005448 | 0 | 0 | 0 | 0 | 0 | 1 |
| NM_005449 | 1 | 1 | 1 | 1 | 1 | 1 |
| NM_005450 | 1 | 0 | 1 | 0 | 0 | 1 |
| NM_005451 | 1 | 1 | 1 | 1 | 1 | 1 |
| NM_005452 | 1 | 1 | 1 | 1 | 0 | 1 |
| NM_005453 | 1 | 0 | 1 | 0 | 1 | 1 |
| NM_005454 | 0 | 0 | 0 | 0 | 0 | 1 |
| NM_005455 | 1 | 0 | 1 | 1 | 1 | 0 |
| NM_005456 | 1 | 0 | 1 | 0 | 0 | 1 |
| NM_005458 | 0 | 0 | 0 | 1 | 0 | 0 |
| NM_005459 | 1 | 0 | 1 | 0 | 0 | 0 |
| NM_005461 | 1 | 1 | 1 | 1 | 1 | 1 |
| NM_005465 | 1 | 0 | 1 | 0 | 0 | 1 |
| NM_005466 | 1 | 0 | 1 | 0 | 0 | 0 |
| NM_005467 | 0 | 0 | 1 | 0 | 0 | 0 |
| NM_005468 | 1 | 0 | 1 | 0 | 0 | 0 |
| NM_005469 | 1 | 0 | 1 | 1 | 0 | 0 |
| NM_005470 | 1 | 0 | 1 | 0 | 0 | 1 |
| NM_005471 | 1 | 1 | 1 | 1 | 0 | 1 |
| NM_005472 | 1 | 1 | 1 | 1 | 0 | 0 |
| NM_005474 | 1 | 1 | 1 | 1 | 0 | 0 |
| NM_005475 | 1 | 0 | 1 | 1 | 0 | 1 |
| NM_005476 | 1 | 0 | 1 | 1 | 1 | 1 |
| NM_005477 | 1 | 1 | 1 | 0 | 0 | 0 |
| NM_005479 | 1 | 0 | 1 | 1 | 0 | 0 |
| NM_005480 | 1 | 1 | 1 | 1 | 1 | 0 |
| NM_005481 | 1 | 0 | 1 | 0 | 0 | 0 |
| NM_005482 | 1 | 1 | 1 | 1 | 1 | 1 |
| NM_005483 | 1 | 1 | 1 | 1 | 0 | 1 |
| NM_005484 | 1 | 0 | 1 | 1 | 1 | 1 |
| NM_005485 | 1 | 1 | 0 | 0 | 0 | 1 |
| NM_005486 | 0 | 0 | 1 | 0 | 0 | 0 |
| NM_005487 | 1 | 0 | 1 | 1 | 0 | 1 |
| NM_005488 | 1 | 1 | 1 | 1 | 1 | 1 |
| NM_005489 | 1 | 1 | 1 | 1 | 0 | 0 |
| NM_005490 | 1 | 1 | 1 | 1 | 0 | 0 |
| NM_005491 | 1 | 1 | 1 | 1 | 0 | 0 |
| NM_005492 | 1 | 0 | 1 | 0 | 0 | 0 |
| NM_005493 | 1 | 1 | 1 | 1 | 1 | 1 |
| NM_005494 | 1 | 1 | 1 | 1 | 0 | 0 |
| NM_005495 | 1 | 0 | 0 | 0 | 0 | 0 |
| NM_005496 | 1 | 1 | 1 | 0 | 0 | 1 |
| NM_005497 | 0 | 0 | 0 | 0 | 0 | 1 |
| NM_005498 | 1 | 1 | 1 | 1 | 1 | 0 |
| NM_005499 | 1 | 1 | 1 | 1 | 0 | 1 |
| NM_005500 | 1 | 1 | 1 | 1 | 0 | 1 |
| NM_005502 | 1 | 1 | 1 | 1 | 1 | 1 |
| NM_005503 | 1 | 1 | 1 | 1 | 0 | 0 |

|           |   |   |   |   |   |   |
|-----------|---|---|---|---|---|---|
| NM_005504 | 1 | 1 | 1 | 0 | 0 | 1 |
| NM_005505 | 1 | 1 | 1 | 1 | 0 | 1 |
| NM_005506 | 1 | 1 | 1 | 1 | 0 | 1 |
| NM_005507 | 1 | 1 | 1 | 1 | 1 | 1 |
| NM_005508 | 1 | 0 | 1 | 0 | 0 | 0 |
| NM_005509 | 1 | 0 | 1 | 1 | 1 | 0 |
| NM_005510 | 1 | 0 | 1 | 1 | 0 | 1 |
| NM_005512 | 1 | 0 | 1 | 1 | 0 | 1 |
| NM_005513 | 1 | 0 | 1 | 0 | 0 | 0 |
| NM_005515 | 0 | 0 | 0 | 0 | 0 | 1 |
| NM_005516 | 1 | 1 | 1 | 1 | 0 | 0 |
| NM_005517 | 1 | 1 | 1 | 0 | 1 | 1 |
| NM_005518 | 0 | 0 | 0 | 0 | 0 | 1 |
| NM_005520 | 1 | 1 | 1 | 1 | 0 | 0 |
| NM_005521 | 1 | 0 | 1 | 1 | 0 | 0 |
| NM_005522 | 1 | 0 | 1 | 0 | 0 | 0 |
| NM_005523 | 0 | 0 | 0 | 1 | 0 | 1 |
| NM_005524 | 1 | 1 | 1 | 1 | 0 | 1 |
| NM_005525 | 1 | 0 | 1 | 1 | 0 | 0 |
| NM_005526 | 1 | 1 | 1 | 1 | 0 | 1 |
| NM_005527 | 1 | 1 | 1 | 1 | 0 | 0 |
| NM_005528 | 1 | 0 | 1 | 1 | 0 | 0 |
| NM_005530 | 1 | 0 | 1 | 1 | 0 | 0 |
| NM_005531 | 1 | 0 | 1 | 0 | 1 | 1 |
| NM_005532 | 1 | 0 | 1 | 0 | 1 | 1 |
| NM_005533 | 1 | 0 | 1 | 0 | 1 | 1 |
| NM_005534 | 1 | 0 | 1 | 1 | 0 | 0 |
| NM_005535 | 1 | 0 | 1 | 0 | 0 | 0 |
| NM_005536 | 1 | 0 | 1 | 0 | 0 | 0 |
| NM_005537 | 1 | 1 | 1 | 1 | 0 | 0 |
| NM_005538 | 1 | 1 | 1 | 1 | 1 | 1 |
| NM_005539 | 1 | 1 | 1 | 1 | 0 | 1 |
| NM_005541 | 1 | 1 | 1 | 1 | 0 | 0 |
| NM_005542 | 1 | 0 | 1 | 0 | 0 | 0 |
| NM_005543 | 1 | 1 | 1 | 1 | 0 | 0 |
| NM_005544 | 1 | 0 | 1 | 0 | 0 | 1 |
| NM_005545 | 1 | 0 | 0 | 0 | 0 | 0 |
| NM_005546 | 1 | 1 | 1 | 1 | 1 | 1 |
| NM_005547 | 1 | 0 | 1 | 1 | 0 | 1 |
| NM_005548 | 1 | 0 | 1 | 0 | 0 | 1 |
| NM_005549 | 1 | 0 | 1 | 0 | 0 | 0 |
| NM_005550 | 1 | 1 | 1 | 1 | 0 | 0 |
| NM_005551 | 1 | 1 | 1 | 1 | 0 | 0 |
| NM_005552 | 1 | 0 | 1 | 0 | 0 | 0 |
| NM_005553 | 1 | 0 | 1 | 0 | 0 | 0 |
| NM_005554 | 1 | 0 | 1 | 1 | 0 | 0 |
| NM_005555 | 1 | 0 | 1 | 0 | 0 | 1 |
| NM_005556 | 1 | 0 | 1 | 0 | 0 | 0 |
| NM_005557 | 1 | 1 | 1 | 1 | 0 | 1 |
| NM_005558 | 1 | 0 | 1 | 1 | 0 | 0 |
| NM_005560 | 1 | 1 | 1 | 0 | 0 | 0 |
| NM_005561 | 1 | 0 | 1 | 1 | 0 | 0 |

|           |   |   |   |   |   |   |
|-----------|---|---|---|---|---|---|
| NM_005562 | 1 | 1 | 1 | 1 | 0 | 0 |
| NM_005563 | 1 | 1 | 1 | 0 | 0 | 1 |
| NM_005564 | 1 | 1 | 1 | 1 | 0 | 1 |
| NM_005565 | 1 | 0 | 1 | 1 | 1 | 1 |
| NM_005566 | 1 | 1 | 1 | 1 | 1 | 1 |
| NM_005567 | 1 | 0 | 1 | 0 | 0 | 1 |
| NM_005568 | 1 | 0 | 1 | 1 | 0 | 0 |
| NM_005569 | 1 | 1 | 1 | 1 | 0 | 0 |
| NM_005570 | 1 | 0 | 1 | 0 | 0 | 0 |
| NM_005572 | 1 | 1 | 1 | 1 | 0 | 1 |
| NM_005573 | 1 | 1 | 1 | 1 | 1 | 1 |
| NM_005574 | 1 | 0 | 1 | 1 | 1 | 1 |
| NM_005575 | 1 | 0 | 1 | 1 | 0 | 1 |
| NM_005576 | 1 | 0 | 1 | 0 | 0 | 1 |
| NM_005578 | 1 | 1 | 1 | 1 | 0 | 0 |
| NM_005581 | 1 | 0 | 1 | 0 | 0 | 0 |
| NM_005582 | 1 | 1 | 1 | 1 | 1 | 0 |
| NM_005583 | 1 | 0 | 1 | 0 | 0 | 0 |
| NM_005584 | 0 | 0 | 0 | 0 | 0 | 1 |
| NM_005585 | 1 | 1 | 1 | 1 | 0 | 0 |
| NM_005586 | 1 | 0 | 1 | 0 | 0 | 0 |
| NM_005587 | 1 | 1 | 1 | 1 | 1 | 1 |
| NM_005588 | 0 | 0 | 0 | 1 | 0 | 0 |
| NM_005589 | 1 | 1 | 1 | 1 | 0 | 0 |
| NM_005590 | 1 | 0 | 1 | 0 | 0 | 1 |
| NM_005592 | 1 | 0 | 1 | 0 | 0 | 1 |
| NM_005594 | 1 | 0 | 1 | 1 | 1 | 1 |
| NM_005595 | 1 | 1 | 1 | 1 | 0 | 0 |
| NM_005597 | 1 | 0 | 1 | 0 | 0 | 0 |
| NM_005598 | 1 | 0 | 1 | 1 | 0 | 0 |
| NM_005599 | 1 | 0 | 1 | 0 | 0 | 0 |
| NM_005600 | 1 | 0 | 1 | 1 | 0 | 0 |
| NM_005601 | 1 | 0 | 1 | 1 | 1 | 0 |
| NM_005602 | 1 | 0 | 1 | 0 | 0 | 1 |
| NM_005603 | 0 | 0 | 1 | 0 | 0 | 0 |
| NM_005604 | 1 | 0 | 0 | 0 | 0 | 1 |
| NM_005605 | 1 | 1 | 1 | 1 | 1 | 1 |
| NM_005606 | 1 | 0 | 0 | 0 | 0 | 1 |
| NM_005608 | 1 | 1 | 1 | 1 | 0 | 1 |
| NM_005609 | 0 | 0 | 1 | 0 | 0 | 0 |
| NM_005610 | 1 | 1 | 1 | 1 | 0 | 0 |
| NM_005611 | 1 | 0 | 1 | 0 | 1 | 0 |
| NM_005612 | 1 | 0 | 1 | 0 | 0 | 0 |
| NM_005613 | 1 | 1 | 1 | 1 | 0 | 0 |
| NM_005614 | 1 | 0 | 1 | 0 | 0 | 1 |
| NM_005615 | 1 | 1 | 1 | 1 | 0 | 1 |
| NM_005618 | 1 | 0 | 1 | 0 | 0 | 0 |
| NM_005619 | 1 | 0 | 1 | 1 | 0 | 0 |
| NM_005620 | 1 | 1 | 1 | 1 | 1 | 1 |
| NM_005621 | 1 | 0 | 1 | 1 | 0 | 0 |
| NM_005622 | 1 | 0 | 1 | 1 | 0 | 0 |
| NM_005623 | 1 | 1 | 1 | 0 | 0 | 0 |

|           |   |   |   |   |   |   |
|-----------|---|---|---|---|---|---|
| NM_005625 | 1 | 1 | 1 | 1 | 0 | 1 |
| NM_005626 | 1 | 0 | 1 | 0 | 0 | 0 |
| NM_005627 | 1 | 1 | 1 | 0 | 1 | 1 |
| NM_005628 | 1 | 1 | 1 | 1 | 1 | 1 |
| NM_005629 | 1 | 0 | 1 | 1 | 0 | 1 |
| NM_005631 | 1 | 1 | 1 | 1 | 0 | 1 |
| NM_005632 | 1 | 0 | 1 | 1 | 0 | 0 |
| NM_005633 | 1 | 0 | 1 | 1 | 0 | 0 |
| NM_005635 | 1 | 0 | 1 | 0 | 0 | 1 |
| NM_005636 | 1 | 0 | 1 | 1 | 0 | 0 |
| NM_005637 | 1 | 0 | 1 | 0 | 0 | 0 |
| NM_005638 | 1 | 0 | 1 | 0 | 0 | 0 |
| NM_005641 | 1 | 0 | 1 | 1 | 0 | 0 |
| NM_005642 | 1 | 1 | 1 | 1 | 0 | 0 |
| NM_005643 | 1 | 0 | 1 | 1 | 1 | 1 |
| NM_005644 | 1 | 1 | 1 | 1 | 0 | 0 |
| NM_005645 | 1 | 0 | 1 | 0 | 0 | 0 |
| NM_005646 | 1 | 1 | 1 | 1 | 1 | 1 |
| NM_005647 | 1 | 0 | 1 | 1 | 0 | 1 |
| NM_005648 | 1 | 0 | 1 | 0 | 1 | 1 |
| NM_005649 | 1 | 1 | 1 | 1 | 0 | 0 |
| NM_005650 | 1 | 0 | 1 | 0 | 0 | 1 |
| NM_005652 | 1 | 0 | 1 | 1 | 0 | 0 |
| NM_005653 | 1 | 0 | 1 | 0 | 0 | 0 |
| NM_005655 | 1 | 0 | 1 | 1 | 1 | 1 |
| NM_005657 | 1 | 1 | 1 | 1 | 1 | 0 |
| NM_005658 | 1 | 1 | 1 | 1 | 1 | 1 |
| NM_005659 | 1 | 0 | 1 | 0 | 0 | 0 |
| NM_005660 | 1 | 1 | 1 | 1 | 1 | 1 |
| NM_005662 | 1 | 0 | 1 | 0 | 0 | 0 |
| NM_005663 | 1 | 1 | 1 | 1 | 0 | 0 |
| NM_005664 | 1 | 0 | 1 | 0 | 0 | 0 |
| NM_005665 | 1 | 1 | 1 | 1 | 0 | 0 |
| NM_005666 | 1 | 0 | 0 | 0 | 0 | 0 |
| NM_005667 | 1 | 1 | 1 | 1 | 0 | 0 |
| NM_005668 | 1 | 0 | 1 | 1 | 1 | 1 |
| NM_005669 | 1 | 1 | 1 | 1 | 0 | 0 |
| NM_005670 | 1 | 1 | 1 | 1 | 1 | 1 |
| NM_005671 | 1 | 0 | 1 | 1 | 0 | 0 |
| NM_005672 | 0 | 0 | 0 | 0 | 0 | 1 |
| NM_005674 | 1 | 1 | 1 | 1 | 1 | 1 |
| NM_005675 | 1 | 0 | 1 | 1 | 0 | 0 |
| NM_005676 | 1 | 1 | 1 | 1 | 0 | 0 |
| NM_005678 | 1 | 1 | 1 | 1 | 1 | 1 |
| NM_005679 | 1 | 1 | 1 | 1 | 1 | 1 |
| NM_005680 | 1 | 0 | 1 | 0 | 0 | 0 |
| NM_005682 | 1 | 0 | 1 | 1 | 0 | 0 |
| NM_005685 | 1 | 1 | 1 | 0 | 0 | 0 |
| NM_005686 | 1 | 1 | 1 | 1 | 1 | 1 |
| NM_005687 | 0 | 0 | 0 | 1 | 0 | 0 |
| NM_005688 | 1 | 1 | 1 | 1 | 0 | 1 |
| NM_005689 | 1 | 1 | 1 | 0 | 1 | 0 |

|           |   |   |   |   |   |   |
|-----------|---|---|---|---|---|---|
| NM_005690 | 1 | 1 | 1 | 0 | 0 | 1 |
| NM_005692 | 1 | 0 | 1 | 1 | 0 | 1 |
| NM_005693 | 1 | 0 | 1 | 1 | 0 | 0 |
| NM_005694 | 1 | 1 | 1 | 1 | 1 | 1 |
| NM_005697 | 1 | 0 | 1 | 0 | 0 | 0 |
| NM_005698 | 1 | 1 | 1 | 1 | 0 | 1 |
| NM_005700 | 1 | 1 | 1 | 0 | 0 | 1 |
| NM_005701 | 1 | 1 | 1 | 1 | 0 | 1 |
| NM_005702 | 1 | 1 | 1 | 1 | 0 | 0 |
| NM_005705 | 1 | 0 | 1 | 0 | 0 | 0 |
| NM_005706 | 1 | 0 | 1 | 0 | 0 | 0 |
| NM_005707 | 1 | 0 | 1 | 0 | 0 | 0 |
| NM_005709 | 1 | 0 | 0 | 0 | 0 | 1 |
| NM_005710 | 1 | 0 | 1 | 1 | 0 | 0 |
| NM_005711 | 0 | 0 | 0 | 0 | 0 | 1 |
| NM_005712 | 0 | 0 | 1 | 0 | 0 | 1 |
| NM_005713 | 1 | 0 | 1 | 0 | 0 | 1 |
| NM_005715 | 1 | 1 | 1 | 1 | 1 | 0 |
| NM_005716 | 1 | 1 | 1 | 1 | 0 | 1 |
| NM_005717 | 1 | 1 | 1 | 1 | 1 | 1 |
| NM_005718 | 1 | 0 | 1 | 0 | 0 | 1 |
| NM_005719 | 1 | 1 | 1 | 1 | 1 | 1 |
| NM_005720 | 1 | 1 | 1 | 1 | 0 | 0 |
| NM_005721 | 1 | 0 | 1 | 1 | 0 | 0 |
| NM_005722 | 1 | 0 | 1 | 1 | 0 | 1 |
| NM_005723 | 1 | 0 | 1 | 0 | 0 | 1 |
| NM_005724 | 1 | 0 | 1 | 0 | 1 | 0 |
| NM_005725 | 1 | 1 | 1 | 1 | 0 | 0 |
| NM_005726 | 1 | 1 | 1 | 1 | 0 | 0 |
| NM_005727 | 0 | 0 | 1 | 1 | 0 | 0 |
| NM_005729 | 1 | 0 | 1 | 0 | 0 | 1 |
| NM_005730 | 1 | 1 | 1 | 1 | 0 | 1 |
| NM_005731 | 0 | 0 | 0 | 1 | 0 | 0 |
| NM_005732 | 1 | 1 | 1 | 1 | 0 | 0 |
| NM_005733 | 1 | 0 | 1 | 0 | 1 | 1 |
| NM_005734 | 1 | 1 | 1 | 1 | 0 | 0 |
| NM_005735 | 1 | 1 | 1 | 1 | 0 | 0 |
| NM_005736 | 1 | 0 | 1 | 1 | 1 | 1 |
| NM_005737 | 1 | 0 | 1 | 0 | 1 | 1 |
| NM_005738 | 1 | 1 | 1 | 1 | 1 | 0 |
| NM_005739 | 1 | 0 | 1 | 0 | 1 | 0 |
| NM_005740 | 1 | 1 | 1 | 1 | 1 | 0 |
| NM_005741 | 1 | 1 | 1 | 1 | 1 | 1 |
| NM_005742 | 1 | 1 | 1 | 0 | 1 | 1 |
| NM_005744 | 1 | 0 | 1 | 1 | 1 | 1 |
| NM_005745 | 1 | 0 | 1 | 0 | 0 | 0 |
| NM_005746 | 1 | 1 | 1 | 1 | 0 | 1 |
| NM_005747 | 1 | 0 | 0 | 0 | 0 | 1 |
| NM_005748 | 1 | 0 | 1 | 0 | 1 | 1 |
| NM_005749 | 1 | 0 | 1 | 0 | 0 | 0 |
| NM_005750 | 1 | 0 | 1 | 1 | 0 | 0 |
| NM_005751 | 1 | 0 | 1 | 0 | 1 | 0 |



|           |   |   |   |   |   |   |
|-----------|---|---|---|---|---|---|
| NM_005752 | 0 | 0 | 0 | 1 | 0 | 0 |
| NM_005754 | 1 | 0 | 1 | 0 | 0 | 0 |
| NM_005755 | 1 | 0 | 0 | 0 | 0 | 1 |
| NM_005757 | 1 | 0 | 1 | 1 | 0 | 0 |
| NM_005758 | 1 | 0 | 1 | 0 | 0 | 0 |
| NM_005759 | 1 | 0 | 1 | 0 | 0 | 0 |
| NM_005760 | 1 | 0 | 1 | 1 | 0 | 0 |
| NM_005761 | 1 | 0 | 1 | 1 | 0 | 0 |
| NM_005762 | 1 | 1 | 1 | 1 | 0 | 0 |
| NM_005763 | 1 | 0 | 1 | 0 | 1 | 1 |
| NM_005764 | 1 | 0 | 1 | 1 | 0 | 0 |
| NM_005765 | 1 | 1 | 1 | 1 | 0 | 0 |
| NM_005766 | 0 | 0 | 1 | 0 | 0 | 0 |
| NM_005767 | 1 | 1 | 1 | 0 | 1 | 0 |
| NM_005768 | 1 | 1 | 1 | 1 | 1 | 1 |
| NM_005770 | 1 | 1 | 1 | 1 | 0 | 0 |
| NM_005771 | 1 | 1 | 1 | 1 | 1 | 1 |
| NM_005772 | 1 | 1 | 1 | 1 | 1 | 1 |
| NM_005773 | 1 | 0 | 1 | 1 | 0 | 0 |
| NM_005774 | 1 | 0 | 1 | 0 | 0 | 1 |
| NM_005775 | 1 | 1 | 0 | 0 | 0 | 0 |
| NM_005776 | 1 | 0 | 1 | 0 | 0 | 1 |
| NM_005777 | 1 | 0 | 1 | 0 | 0 | 0 |
| NM_005778 | 1 | 0 | 1 | 0 | 0 | 0 |
| NM_005779 | 1 | 1 | 1 | 1 | 0 | 0 |
| NM_005780 | 1 | 0 | 1 | 1 | 0 | 0 |
| NM_005781 | 1 | 1 | 1 | 1 | 1 | 1 |
| NM_005782 | 1 | 1 | 1 | 1 | 0 | 0 |
| NM_005783 | 1 | 0 | 1 | 0 | 0 | 1 |
| NM_005785 | 1 | 1 | 1 | 1 | 0 | 0 |
| NM_005786 | 1 | 0 | 1 | 0 | 1 | 0 |
| NM_005787 | 1 | 1 | 1 | 1 | 0 | 0 |
| NM_005789 | 1 | 0 | 1 | 1 | 1 | 1 |
| NM_005791 | 1 | 0 | 1 | 1 | 1 | 0 |
| NM_005792 | 1 | 1 | 1 | 1 | 0 | 0 |
| NM_005793 | 1 | 0 | 1 | 1 | 0 | 0 |
| NM_005794 | 1 | 0 | 1 | 0 | 0 | 1 |
| NM_005795 | 1 | 1 | 1 | 1 | 0 | 0 |
| NM_005796 | 1 | 0 | 1 | 1 | 0 | 1 |
| NM_005797 | 1 | 1 | 1 | 1 | 0 | 0 |
| NM_005798 | 1 | 0 | 1 | 1 | 0 | 0 |
| NM_005799 | 1 | 1 | 1 | 1 | 0 | 0 |
| NM_005800 | 1 | 0 | 1 | 0 | 0 | 0 |
| NM_005801 | 1 | 1 | 1 | 1 | 1 | 1 |
| NM_005802 | 1 | 1 | 1 | 1 | 0 | 0 |
| NM_005803 | 1 | 1 | 1 | 1 | 0 | 1 |
| NM_005804 | 1 | 1 | 1 | 1 | 0 | 0 |
| NM_005805 | 1 | 1 | 1 | 1 | 0 | 1 |
| NM_005806 | 1 | 1 | 1 | 1 | 1 | 1 |
| NM_005807 | 1 | 1 | 1 | 0 | 0 | 0 |
| NM_005808 | 1 | 0 | 1 | 0 | 0 | 0 |
| NM_005809 | 1 | 0 | 1 | 1 | 0 | 0 |

|           |   |   |   |   |   |   |
|-----------|---|---|---|---|---|---|
| NM_005810 | 1 | 0 | 1 | 1 | 0 | 0 |
| NM_005811 | 1 | 0 | 1 | 0 | 0 | 1 |
| NM_005813 | 1 | 0 | 1 | 0 | 1 | 1 |
| NM_005814 | 1 | 1 | 1 | 1 | 1 | 1 |
| NM_005815 | 1 | 0 | 1 | 1 | 1 | 1 |
| NM_005816 | 1 | 1 | 1 | 1 | 0 | 0 |
| NM_005817 | 1 | 0 | 1 | 0 | 1 | 1 |
| NM_005819 | 1 | 0 | 1 | 0 | 0 | 0 |
| NM_005821 | 1 | 0 | 1 | 0 | 0 | 0 |
| NM_005822 | 1 | 0 | 1 | 1 | 0 | 1 |
| NM_005824 | 1 | 1 | 1 | 1 | 0 | 0 |
| NM_005825 | 1 | 0 | 1 | 0 | 0 | 0 |
| NM_005826 | 1 | 0 | 1 | 0 | 0 | 0 |
| NM_005827 | 1 | 1 | 1 | 1 | 0 | 1 |
| NM_005828 | 1 | 0 | 1 | 1 | 0 | 0 |
| NM_005829 | 1 | 1 | 1 | 1 | 0 | 0 |
| NM_005830 | 1 | 0 | 1 | 1 | 0 | 1 |
| NM_005831 | 1 | 0 | 1 | 0 | 0 | 1 |
| NM_005833 | 1 | 1 | 1 | 0 | 0 | 1 |
| NM_005834 | 1 | 0 | 1 | 0 | 0 | 0 |
| NM_005836 | 1 | 0 | 1 | 0 | 0 | 1 |
| NM_005837 | 1 | 0 | 1 | 0 | 0 | 0 |
| NM_005839 | 1 | 0 | 1 | 1 | 0 | 1 |
| NM_005840 | 1 | 0 | 1 | 1 | 0 | 0 |
| NM_005842 | 1 | 0 | 1 | 0 | 0 | 0 |
| NM_005843 | 1 | 0 | 1 | 0 | 1 | 0 |
| NM_005844 | 1 | 1 | 1 | 1 | 0 | 0 |
| NM_005845 | 1 | 0 | 1 | 0 | 0 | 0 |
| NM_005847 | 1 | 0 | 1 | 0 | 0 | 0 |
| NM_005849 | 1 | 1 | 1 | 1 | 1 | 1 |
| NM_005850 | 1 | 0 | 1 | 1 | 0 | 0 |
| NM_005851 | 1 | 0 | 1 | 1 | 0 | 0 |
| NM_005853 | 1 | 0 | 1 | 0 | 0 | 1 |
| NM_005855 | 1 | 0 | 1 | 0 | 1 | 0 |
| NM_005856 | 1 | 0 | 1 | 1 | 1 | 1 |
| NM_005857 | 1 | 1 | 1 | 1 | 0 | 1 |
| NM_005858 | 1 | 1 | 1 | 1 | 0 | 0 |
| NM_005859 | 1 | 0 | 1 | 1 | 1 | 1 |
| NM_005860 | 1 | 0 | 0 | 0 | 0 | 1 |
| NM_005861 | 1 | 0 | 1 | 0 | 0 | 0 |
| NM_005862 | 1 | 0 | 1 | 0 | 1 | 0 |
| NM_005863 | 1 | 1 | 1 | 1 | 0 | 1 |
| NM_005864 | 0 | 0 | 1 | 0 | 0 | 0 |
| NM_005865 | 1 | 0 | 1 | 0 | 0 | 1 |
| NM_005866 | 1 | 1 | 1 | 1 | 0 | 1 |
| NM_005868 | 1 | 0 | 1 | 0 | 1 | 0 |
| NM_005869 | 1 | 0 | 1 | 1 | 0 | 0 |
| NM_005870 | 1 | 1 | 1 | 1 | 1 | 0 |
| NM_005871 | 1 | 1 | 1 | 1 | 0 | 0 |
| NM_005872 | 1 | 0 | 1 | 0 | 0 | 1 |
| NM_005873 | 1 | 0 | 1 | 1 | 1 | 1 |
| NM_005874 | 1 | 1 | 1 | 1 | 0 | 0 |

|           |   |   |   |   |   |   |
|-----------|---|---|---|---|---|---|
| NM_005875 | 1 | 1 | 1 | 1 | 1 | 1 |
| NM_005876 | 1 | 1 | 1 | 1 | 0 | 0 |
| NM_005877 | 1 | 1 | 1 | 1 | 0 | 0 |
| NM_005879 | 1 | 0 | 1 | 0 | 0 | 0 |
| NM_005880 | 1 | 0 | 1 | 0 | 0 | 0 |
| NM_005881 | 1 | 1 | 1 | 1 | 0 | 1 |
| NM_005882 | 1 | 1 | 1 | 1 | 0 | 1 |
| NM_005884 | 1 | 0 | 1 | 0 | 0 | 0 |
| NM_005885 | 1 | 0 | 1 | 1 | 0 | 0 |
| NM_005886 | 1 | 0 | 1 | 0 | 0 | 1 |
| NM_005887 | 1 | 0 | 1 | 1 | 0 | 1 |
| NM_005888 | 1 | 1 | 1 | 1 | 1 | 1 |
| NM_005889 | 0 | 0 | 0 | 0 | 0 | 1 |
| NM_005890 | 1 | 1 | 1 | 1 | 0 | 1 |
| NM_005891 | 1 | 1 | 1 | 1 | 1 | 1 |
| NM_005892 | 1 | 1 | 1 | 1 | 1 | 1 |
| NM_005893 | 0 | 0 | 1 | 0 | 0 | 0 |
| NM_005895 | 1 | 1 | 1 | 1 | 0 | 0 |
| NM_005896 | 1 | 1 | 1 | 1 | 1 | 1 |
| NM_005897 | 1 | 0 | 1 | 0 | 0 | 1 |
| NM_005898 | 1 | 0 | 1 | 0 | 0 | 0 |
| NM_005900 | 1 | 1 | 1 | 1 | 1 | 1 |
| NM_005901 | 1 | 0 | 1 | 0 | 0 | 0 |
| NM_005902 | 1 | 1 | 1 | 1 | 0 | 1 |
| NM_005903 | 1 | 0 | 1 | 0 | 0 | 0 |
| NM_005904 | 1 | 0 | 1 | 0 | 1 | 0 |
| NM_005905 | 0 | 0 | 0 | 0 | 0 | 1 |
| NM_005906 | 1 | 1 | 1 | 1 | 0 | 1 |
| NM_005907 | 1 | 1 | 1 | 1 | 0 | 0 |
| NM_005908 | 1 | 1 | 1 | 1 | 0 | 1 |
| NM_005909 | 0 | 0 | 0 | 0 | 0 | 1 |
| NM_005910 | 1 | 1 | 1 | 1 | 1 | 0 |
| NM_005911 | 1 | 1 | 1 | 1 | 0 | 1 |
| NM_005912 | 1 | 1 | 1 | 1 | 0 | 1 |
| NM_005913 | 1 | 0 | 1 | 0 | 0 | 0 |
| NM_005915 | 1 | 1 | 1 | 1 | 0 | 1 |
| NM_005916 | 1 | 0 | 1 | 1 | 1 | 1 |
| NM_005917 | 1 | 1 | 1 | 1 | 0 | 1 |
| NM_005918 | 1 | 1 | 1 | 1 | 0 | 0 |
| NM_005919 | 1 | 0 | 1 | 0 | 1 | 0 |
| NM_005920 | 1 | 1 | 1 | 1 | 1 | 1 |
| NM_005922 | 1 | 0 | 1 | 1 | 0 | 0 |
| NM_005923 | 1 | 1 | 1 | 1 | 0 | 0 |
| NM_005925 | 1 | 0 | 1 | 0 | 0 | 0 |
| NM_005926 | 1 | 1 | 1 | 1 | 1 | 1 |
| NM_005927 | 1 | 0 | 1 | 1 | 1 | 1 |
| NM_005928 | 1 | 0 | 1 | 0 | 0 | 0 |
| NM_005929 | 1 | 0 | 1 | 0 | 0 | 0 |
| NM_005930 | 1 | 0 | 1 | 1 | 0 | 0 |
| NM_005931 | 1 | 0 | 1 | 1 | 0 | 0 |
| NM_005932 | 1 | 1 | 1 | 1 | 1 | 1 |
| NM_005935 | 1 | 1 | 1 | 1 | 1 | 1 |

|           |   |   |   |   |   |   |
|-----------|---|---|---|---|---|---|
| NM_005936 | 1 | 0 | 1 | 0 | 0 | 0 |
| NM_005937 | 1 | 0 | 1 | 0 | 0 | 0 |
| NM_005938 | 1 | 0 | 1 | 1 | 1 | 1 |
| NM_005940 | 1 | 0 | 1 | 0 | 0 | 0 |
| NM_005941 | 1 | 1 | 1 | 1 | 0 | 0 |
| NM_005942 | 1 | 0 | 1 | 0 | 0 | 1 |
| NM_005944 | 1 | 1 | 1 | 1 | 0 | 0 |
| NM_005945 | 1 | 1 | 1 | 1 | 1 | 1 |
| NM_005946 | 1 | 0 | 1 | 1 | 0 | 0 |
| NM_005949 | 1 | 0 | 1 | 0 | 0 | 1 |
| NM_005951 | 1 | 0 | 1 | 0 | 0 | 0 |
| NM_005952 | 1 | 1 | 1 | 0 | 0 | 1 |
| NM_005953 | 1 | 1 | 1 | 1 | 0 | 0 |
| NM_005954 | 1 | 1 | 1 | 1 | 0 | 1 |
| NM_005955 | 1 | 0 | 1 | 1 | 0 | 0 |
| NM_005956 | 1 | 1 | 1 | 0 | 0 | 1 |
| NM_005957 | 1 | 0 | 1 | 0 | 0 | 0 |
| NM_005959 | 1 | 0 | 1 | 0 | 0 | 1 |
| NM_005962 | 1 | 1 | 1 | 1 | 1 | 1 |
| NM_005963 | 0 | 1 | 1 | 0 | 0 | 0 |
| NM_005965 | 1 | 0 | 1 | 1 | 0 | 1 |
| NM_005966 | 1 | 1 | 1 | 1 | 0 | 1 |
| NM_005967 | 1 | 0 | 0 | 0 | 0 | 0 |
| NM_005968 | 1 | 0 | 1 | 1 | 0 | 1 |
| NM_005969 | 1 | 1 | 1 | 1 | 0 | 1 |
| NM_005971 | 0 | 0 | 0 | 0 | 0 | 1 |
| NM_005972 | 1 | 0 | 1 | 0 | 0 | 0 |
| NM_005973 | 1 | 0 | 1 | 0 | 0 | 0 |
| NM_005975 | 1 | 0 | 1 | 0 | 0 | 0 |
| NM_005977 | 1 | 0 | 1 | 0 | 0 | 0 |
| NM_005978 | 1 | 1 | 1 | 1 | 1 | 0 |
| NM_005979 | 1 | 0 | 1 | 1 | 1 | 0 |
| NM_005980 | 1 | 1 | 1 | 1 | 1 | 1 |
| NM_005981 | 1 | 1 | 1 | 1 | 0 | 0 |
| NM_005982 | 1 | 0 | 0 | 0 | 0 | 0 |
| NM_005983 | 1 | 1 | 1 | 1 | 0 | 0 |
| NM_005984 | 1 | 0 | 1 | 0 | 0 | 0 |
| NM_005987 | 1 | 0 | 1 | 0 | 0 | 0 |
| NM_005988 | 1 | 1 | 1 | 1 | 0 | 0 |
| NM_005989 | 0 | 0 | 1 | 0 | 0 | 0 |
| NM_005990 | 1 | 1 | 1 | 1 | 0 | 0 |
| NM_005992 | 1 | 0 | 1 | 0 | 0 | 0 |
| NM_005993 | 1 | 0 | 1 | 1 | 1 | 1 |
| NM_005994 | 1 | 0 | 1 | 0 | 0 | 0 |
| NM_005995 | 1 | 0 | 1 | 1 | 1 | 1 |
| NM_005996 | 1 | 0 | 1 | 0 | 0 | 0 |
| NM_005997 | 1 | 0 | 0 | 0 | 0 | 1 |
| NM_005998 | 1 | 0 | 1 | 1 | 0 | 0 |
| NM_005999 | 1 | 0 | 1 | 0 | 0 | 0 |
| NM_006000 | 1 | 0 | 1 | 1 | 0 | 1 |
| NM_006001 | 1 | 0 | 1 | 0 | 1 | 1 |
| NM_006002 | 1 | 0 | 1 | 0 | 0 | 1 |

|           |   |   |   |   |   |   |
|-----------|---|---|---|---|---|---|
| NM_006003 | 1 | 1 | 1 | 1 | 0 | 1 |
| NM_006004 | 1 | 1 | 1 | 1 | 0 | 1 |
| NM_006005 | 1 | 0 | 1 | 0 | 0 | 0 |
| NM_006006 | 1 | 1 | 1 | 1 | 1 | 0 |
| NM_006007 | 1 | 0 | 1 | 1 | 1 | 1 |
| NM_006009 | 1 | 0 | 1 | 1 | 1 | 1 |
| NM_006010 | 1 | 1 | 1 | 1 | 1 | 1 |
| NM_006012 | 1 | 1 | 1 | 1 | 0 | 1 |
| NM_006013 | 1 | 0 | 1 | 1 | 1 | 1 |
| NM_006014 | 1 | 1 | 1 | 1 | 0 | 0 |
| NM_006016 | 1 | 0 | 1 | 0 | 0 | 0 |
| NM_006017 | 1 | 0 | 1 | 0 | 0 | 0 |
| NM_006018 | 1 | 0 | 1 | 0 | 1 | 1 |
| NM_006019 | 1 | 0 | 1 | 1 | 1 | 1 |
| NM_006020 | 1 | 0 | 1 | 1 | 0 | 0 |
| NM_006021 | 1 | 1 | 1 | 1 | 0 | 0 |
| NM_006022 | 1 | 1 | 1 | 1 | 1 | 0 |
| NM_006023 | 1 | 0 | 1 | 1 | 0 | 1 |
| NM_006024 | 1 | 1 | 1 | 1 | 0 | 1 |
| NM_006025 | 0 | 0 | 1 | 1 | 0 | 0 |
| NM_006026 | 1 | 0 | 1 | 1 | 1 | 1 |
| NM_006028 | 1 | 0 | 0 | 0 | 0 | 1 |
| NM_006029 | 1 | 0 | 1 | 1 | 1 | 1 |
| NM_006030 | 1 | 1 | 1 | 1 | 1 | 0 |
| NM_006031 | 1 | 0 | 1 | 0 | 0 | 0 |
| NM_006032 | 0 | 0 | 0 | 0 | 0 | 1 |
| NM_006033 | 1 | 0 | 0 | 0 | 0 | 0 |
| NM_006034 | 1 | 1 | 1 | 1 | 1 | 1 |
| NM_006035 | 1 | 1 | 1 | 1 | 0 | 0 |
| NM_006037 | 1 | 1 | 1 | 1 | 0 | 0 |
| NM_006038 | 1 | 0 | 1 | 1 | 0 | 1 |
| NM_006039 | 1 | 0 | 1 | 1 | 0 | 0 |
| NM_006042 | 1 | 0 | 0 | 0 | 0 | 0 |
| NM_006043 | 0 | 1 | 0 | 0 | 0 | 0 |
| NM_006044 | 1 | 0 | 1 | 0 | 0 | 1 |
| NM_006048 | 1 | 0 | 1 | 1 | 0 | 0 |
| NM_006049 | 1 | 0 | 1 | 0 | 0 | 1 |
| NM_006051 | 1 | 0 | 1 | 0 | 1 | 1 |
| NM_006052 | 1 | 0 | 1 | 0 | 0 | 0 |
| NM_006053 | 1 | 0 | 1 | 1 | 1 | 1 |
| NM_006054 | 1 | 1 | 1 | 1 | 0 | 0 |
| NM_006055 | 1 | 0 | 1 | 1 | 1 | 1 |
| NM_006056 | 1 | 1 | 1 | 1 | 1 | 1 |
| NM_006058 | 1 | 0 | 1 | 0 | 1 | 1 |
| NM_006059 | 1 | 0 | 1 | 0 | 0 | 0 |
| NM_006060 | 1 | 0 | 1 | 0 | 0 | 0 |
| NM_006061 | 1 | 0 | 1 | 0 | 0 | 0 |
| NM_006063 | 1 | 1 | 1 | 1 | 1 | 0 |
| NM_006064 | 1 | 0 | 1 | 1 | 0 | 1 |
| NM_006066 | 1 | 1 | 1 | 1 | 0 | 0 |
| NM_006067 | 1 | 1 | 1 | 1 | 0 | 0 |
| NM_006068 | 1 | 0 | 1 | 0 | 0 | 0 |

|           |   |   |   |   |   |   |
|-----------|---|---|---|---|---|---|
| NM_006070 | 1 | 0 | 1 | 0 | 0 | 0 |
| NM_006071 | 0 | 0 | 0 | 0 | 0 | 1 |
| NM_006072 | 0 | 0 | 0 | 0 | 0 | 1 |
| NM_006073 | 0 | 0 | 0 | 0 | 0 | 1 |
| NM_006074 | 1 | 1 | 1 | 0 | 0 | 0 |
| NM_006076 | 1 | 0 | 1 | 1 | 0 | 1 |
| NM_006077 | 1 | 1 | 1 | 1 | 0 | 0 |
| NM_006078 | 1 | 0 | 1 | 0 | 0 | 0 |
| NM_006079 | 1 | 1 | 1 | 1 | 0 | 0 |
| NM_006082 | 1 | 0 | 1 | 0 | 1 | 1 |
| NM_006083 | 1 | 1 | 1 | 1 | 0 | 1 |
| NM_006084 | 1 | 0 | 1 | 0 | 1 | 1 |
| NM_006085 | 1 | 0 | 1 | 0 | 0 | 0 |
| NM_006086 | 1 | 1 | 1 | 0 | 0 | 1 |
| NM_006087 | 1 | 0 | 1 | 1 | 1 | 1 |
| NM_006088 | 1 | 0 | 1 | 0 | 1 | 1 |
| NM_006089 | 1 | 1 | 1 | 1 | 0 | 0 |
| NM_006090 | 1 | 0 | 1 | 0 | 0 | 0 |
| NM_006091 | 1 | 1 | 1 | 1 | 0 | 0 |
| NM_006092 | 1 | 1 | 1 | 1 | 0 | 1 |
| NM_006093 | 1 | 1 | 1 | 1 | 0 | 1 |
| NM_006095 | 1 | 1 | 1 | 1 | 0 | 1 |
| NM_006096 | 1 | 1 | 1 | 1 | 0 | 1 |
| NM_006097 | 1 | 0 | 1 | 0 | 0 | 0 |
| NM_006098 | 1 | 1 | 1 | 1 | 0 | 1 |
| NM_006099 | 1 | 1 | 1 | 1 | 0 | 0 |
| NM_006100 | 1 | 1 | 1 | 1 | 1 | 1 |
| NM_006101 | 1 | 1 | 1 | 0 | 1 | 1 |
| NM_006102 | 1 | 1 | 1 | 1 | 1 | 1 |
| NM_006103 | 1 | 0 | 1 | 0 | 0 | 1 |
| NM_006105 | 1 | 1 | 1 | 0 | 0 | 0 |
| NM_006106 | 1 | 0 | 0 | 0 | 0 | 1 |
| NM_006107 | 1 | 0 | 1 | 1 | 1 | 1 |
| NM_006108 | 1 | 1 | 1 | 1 | 0 | 0 |
| NM_006109 | 1 | 0 | 1 | 0 | 0 | 0 |
| NM_006110 | 1 | 1 | 1 | 1 | 0 | 0 |
| NM_006111 | 1 | 0 | 1 | 1 | 1 | 1 |
| NM_006112 | 1 | 0 | 1 | 1 | 1 | 1 |
| NM_006113 | 1 | 0 | 1 | 1 | 0 | 1 |
| NM_006114 | 1 | 1 | 1 | 1 | 0 | 1 |
| NM_006115 | 1 | 0 | 1 | 0 | 0 | 1 |
| NM_006116 | 1 | 1 | 1 | 1 | 0 | 1 |
| NM_006117 | 1 | 0 | 1 | 1 | 0 | 1 |
| NM_006118 | 1 | 0 | 1 | 1 | 0 | 0 |
| NM_006120 | 1 | 0 | 1 | 0 | 0 | 1 |
| NM_006121 | 1 | 0 | 1 | 0 | 0 | 0 |
| NM_006122 | 1 | 0 | 1 | 1 | 0 | 0 |
| NM_006123 | 1 | 0 | 1 | 1 | 0 | 1 |
| NM_006129 | 1 | 0 | 1 | 0 | 0 | 0 |
| NM_006130 | 1 | 0 | 1 | 0 | 0 | 1 |
| NM_006131 | 0 | 0 | 1 | 0 | 0 | 0 |
| NM_006133 | 1 | 1 | 1 | 1 | 0 | 0 |

|           |   |   |   |   |   |   |
|-----------|---|---|---|---|---|---|
| NM_006134 | 1 | 0 | 1 | 1 | 0 | 1 |
| NM_006135 | 1 | 0 | 1 | 0 | 1 | 1 |
| NM_006136 | 1 | 1 | 1 | 1 | 0 | 0 |
| NM_006137 | 1 | 0 | 1 | 0 | 0 | 1 |
| NM_006138 | 1 | 1 | 1 | 1 | 0 | 0 |
| NM_006139 | 1 | 1 | 1 | 1 | 0 | 1 |
| NM_006140 | 1 | 0 | 1 | 0 | 0 | 0 |
| NM_006141 | 1 | 1 | 1 | 1 | 0 | 1 |
| NM_006142 | 1 | 0 | 1 | 1 | 1 | 1 |
| NM_006143 | 1 | 0 | 1 | 1 | 0 | 1 |
| NM_006144 | 1 | 0 | 1 | 1 | 1 | 0 |
| NM_006145 | 1 | 0 | 1 | 1 | 0 | 1 |
| NM_006147 | 1 | 0 | 1 | 1 | 0 | 0 |
| NM_006148 | 1 | 0 | 1 | 1 | 1 | 1 |
| NM_006149 | 1 | 1 | 1 | 1 | 0 | 0 |
| NM_006150 | 1 | 0 | 0 | 0 | 0 | 1 |
| NM_006152 | 1 | 1 | 1 | 1 | 0 | 1 |
| NM_006153 | 1 | 0 | 1 | 0 | 0 | 0 |
| NM_006156 | 1 | 0 | 1 | 0 | 0 | 0 |
| NM_006157 | 1 | 0 | 1 | 0 | 0 | 0 |
| NM_006158 | 1 | 0 | 1 | 0 | 0 | 1 |
| NM_006159 | 1 | 1 | 1 | 1 | 1 | 1 |
| NM_006160 | 1 | 0 | 1 | 0 | 0 | 0 |
| NM_006161 | 1 | 0 | 1 | 0 | 0 | 0 |
| NM_006162 | 1 | 1 | 1 | 1 | 0 | 0 |
| NM_006163 | 1 | 1 | 1 | 1 | 1 | 1 |
| NM_006164 | 1 | 0 | 1 | 1 | 1 | 1 |
| NM_006165 | 1 | 1 | 0 | 0 | 0 | 1 |
| NM_006166 | 1 | 0 | 1 | 1 | 0 | 0 |
| NM_006167 | 1 | 0 | 1 | 1 | 0 | 0 |
| NM_006169 | 1 | 1 | 1 | 1 | 0 | 0 |
| NM_006170 | 1 | 1 | 1 | 1 | 0 | 0 |
| NM_006172 | 1 | 0 | 0 | 0 | 0 | 1 |
| NM_006175 | 1 | 0 | 0 | 0 | 0 | 0 |
| NM_006176 | 1 | 0 | 1 | 0 | 0 | 1 |
| NM_006177 | 1 | 0 | 1 | 0 | 0 | 0 |
| NM_006178 | 1 | 0 | 1 | 0 | 0 | 1 |
| NM_006182 | 1 | 1 | 1 | 1 | 1 | 1 |
| NM_006183 | 0 | 0 | 1 | 1 | 0 | 0 |
| NM_006184 | 1 | 0 | 1 | 0 | 0 | 0 |
| NM_006185 | 1 | 1 | 1 | 1 | 1 | 1 |
| NM_006186 | 1 | 0 | 1 | 0 | 0 | 1 |
| NM_006187 | 1 | 1 | 1 | 0 | 1 | 1 |
| NM_006188 | 1 | 0 | 0 | 0 | 0 | 1 |
| NM_006189 | 1 | 1 | 1 | 0 | 0 | 0 |
| NM_006190 | 1 | 0 | 1 | 1 | 0 | 0 |
| NM_006191 | 1 | 0 | 1 | 1 | 0 | 0 |
| NM_006192 | 1 | 1 | 1 | 1 | 1 | 1 |
| NM_006194 | 0 | 0 | 1 | 0 | 0 | 0 |
| NM_006195 | 1 | 0 | 1 | 1 | 0 | 0 |
| NM_006196 | 1 | 0 | 1 | 0 | 1 | 1 |
| NM_006197 | 1 | 0 | 1 | 0 | 1 | 1 |

|           |   |   |   |   |   |   |
|-----------|---|---|---|---|---|---|
| NM_006200 | 1 | 1 | 1 | 1 | 0 | 0 |
| NM_006202 | 1 | 0 | 1 | 0 | 0 | 0 |
| NM_006203 | 1 | 0 | 1 | 0 | 0 | 0 |
| NM_006205 | 1 | 1 | 1 | 0 | 0 | 1 |
| NM_006206 | 1 | 0 | 1 | 1 | 0 | 0 |
| NM_006207 | 0 | 1 | 0 | 0 | 0 | 0 |
| NM_006208 | 1 | 0 | 1 | 0 | 0 | 0 |
| NM_006209 | 1 | 0 | 1 | 0 | 0 | 0 |
| NM_006210 | 1 | 0 | 1 | 0 | 0 | 0 |
| NM_006212 | 1 | 0 | 0 | 0 | 0 | 0 |
| NM_006213 | 1 | 0 | 1 | 1 | 0 | 0 |
| NM_006214 | 1 | 0 | 1 | 0 | 1 | 0 |
| NM_006215 | 1 | 0 | 0 | 0 | 0 | 0 |
| NM_006216 | 1 | 1 | 1 | 0 | 0 | 0 |
| NM_006217 | 0 | 0 | 1 | 0 | 0 | 0 |
| NM_006218 | 1 | 0 | 1 | 1 | 0 | 0 |
| NM_006219 | 1 | 1 | 1 | 1 | 0 | 0 |
| NM_006221 | 1 | 1 | 1 | 1 | 0 | 1 |
| NM_006222 | 1 | 0 | 1 | 0 | 0 | 0 |
| NM_006223 | 1 | 1 | 1 | 1 | 0 | 1 |
| NM_006224 | 1 | 1 | 1 | 1 | 0 | 1 |
| NM_006225 | 1 | 0 | 0 | 0 | 0 | 1 |
| NM_006226 | 1 | 0 | 1 | 1 | 1 | 0 |
| NM_006227 | 1 | 1 | 1 | 1 | 1 | 0 |
| NM_006228 | 1 | 1 | 1 | 1 | 1 | 1 |
| NM_006230 | 1 | 1 | 1 | 1 | 0 | 1 |
| NM_006231 | 0 | 0 | 1 | 0 | 0 | 0 |
| NM_006232 | 1 | 1 | 1 | 1 | 0 | 0 |
| NM_006233 | 1 | 1 | 1 | 1 | 0 | 0 |
| NM_006234 | 1 | 0 | 1 | 0 | 1 | 1 |
| NM_006235 | 1 | 0 | 1 | 0 | 0 | 1 |
| NM_006236 | 1 | 0 | 1 | 0 | 0 | 0 |
| NM_006237 | 1 | 0 | 1 | 0 | 0 | 0 |
| NM_006238 | 1 | 1 | 1 | 1 | 1 | 1 |
| NM_006240 | 1 | 0 | 1 | 0 | 0 | 1 |
| NM_006241 | 1 | 0 | 1 | 0 | 1 | 1 |
| NM_006242 | 1 | 0 | 1 | 1 | 0 | 1 |
| NM_006243 | 1 | 1 | 1 | 1 | 1 | 1 |
| NM_006244 | 1 | 0 | 1 | 1 | 0 | 1 |
| NM_006245 | 1 | 0 | 1 | 0 | 0 | 0 |
| NM_006246 | 1 | 0 | 1 | 1 | 0 | 1 |
| NM_006247 | 1 | 0 | 1 | 0 | 0 | 0 |
| NM_006249 | 1 | 0 | 1 | 0 | 0 | 0 |
| NM_006250 | 1 | 0 | 0 | 0 | 0 | 0 |
| NM_006251 | 1 | 0 | 1 | 0 | 0 | 1 |
| NM_006252 | 0 | 0 | 1 | 0 | 0 | 0 |
| NM_006253 | 1 | 1 | 1 | 1 | 1 | 1 |
| NM_006254 | 1 | 0 | 1 | 1 | 0 | 0 |
| NM_006255 | 1 | 0 | 1 | 0 | 1 | 0 |
| NM_006256 | 1 | 1 | 1 | 1 | 0 | 0 |
| NM_006257 | 1 | 0 | 1 | 1 | 0 | 0 |
| NM_006259 | 1 | 0 | 1 | 0 | 0 | 0 |



|           |   |   |   |   |   |   |
|-----------|---|---|---|---|---|---|
| NM_006260 | 1 | 0 | 1 | 1 | 1 | 1 |
| NM_006262 | 1 | 1 | 1 | 1 | 0 | 1 |
| NM_006263 | 1 | 1 | 1 | 0 | 1 | 1 |
| NM_006264 | 1 | 1 | 1 | 1 | 0 | 1 |
| NM_006265 | 1 | 0 | 1 | 0 | 0 | 0 |
| NM_006266 | 1 | 0 | 1 | 0 | 0 | 0 |
| NM_006267 | 1 | 0 | 1 | 0 | 1 | 1 |
| NM_006268 | 1 | 0 | 1 | 1 | 0 | 0 |
| NM_006269 | 1 | 0 | 0 | 0 | 0 | 0 |
| NM_006270 | 1 | 0 | 1 | 0 | 0 | 0 |
| NM_006271 | 1 | 0 | 1 | 1 | 1 | 0 |
| NM_006272 | 1 | 1 | 1 | 0 | 0 | 0 |
| NM_006273 | 1 | 0 | 0 | 0 | 0 | 0 |
| NM_006275 | 1 | 0 | 1 | 0 | 0 | 1 |
| NM_006276 | 1 | 1 | 1 | 1 | 0 | 0 |
| NM_006277 | 1 | 0 | 1 | 0 | 0 | 0 |
| NM_006278 | 1 | 1 | 1 | 1 | 1 | 1 |
| NM_006280 | 1 | 1 | 1 | 1 | 0 | 0 |
| NM_006281 | 1 | 0 | 1 | 0 | 1 | 1 |
| NM_006282 | 1 | 0 | 1 | 1 | 1 | 1 |
| NM_006283 | 1 | 1 | 1 | 1 | 0 | 0 |
| NM_006284 | 1 | 0 | 1 | 0 | 0 | 1 |
| NM_006285 | 1 | 0 | 1 | 1 | 0 | 0 |
| NM_006286 | 1 | 1 | 1 | 1 | 1 | 1 |
| NM_006287 | 1 | 0 | 1 | 0 | 0 | 0 |
| NM_006288 | 1 | 0 | 0 | 0 | 0 | 0 |
| NM_006289 | 1 | 1 | 1 | 1 | 0 | 0 |
| NM_006290 | 1 | 0 | 1 | 1 | 0 | 0 |
| NM_006291 | 1 | 0 | 1 | 0 | 0 | 0 |
| NM_006292 | 1 | 1 | 1 | 1 | 0 | 0 |
| NM_006293 | 1 | 0 | 0 | 0 | 0 | 1 |
| NM_006294 | 1 | 1 | 1 | 1 | 0 | 0 |
| NM_006295 | 1 | 1 | 1 | 1 | 0 | 0 |
| NM_006296 | 1 | 1 | 1 | 0 | 0 | 1 |
| NM_006297 | 1 | 0 | 1 | 0 | 0 | 1 |
| NM_006298 | 1 | 0 | 1 | 0 | 0 | 0 |
| NM_006299 | 1 | 0 | 1 | 0 | 1 | 1 |
| NM_006300 | 1 | 1 | 1 | 1 | 0 | 0 |
| NM_006301 | 1 | 0 | 1 | 1 | 0 | 0 |
| NM_006302 | 1 | 1 | 1 | 1 | 0 | 0 |
| NM_006303 | 1 | 1 | 1 | 1 | 0 | 1 |
| NM_006304 | 1 | 1 | 1 | 1 | 0 | 1 |
| NM_006305 | 1 | 0 | 1 | 1 | 1 | 1 |
| NM_006306 | 1 | 1 | 1 | 1 | 0 | 0 |
| NM_006308 | 1 | 0 | 1 | 0 | 0 | 1 |
| NM_006309 | 1 | 1 | 1 | 1 | 1 | 0 |
| NM_006310 | 1 | 0 | 1 | 1 | 0 | 1 |
| NM_006311 | 1 | 0 | 1 | 1 | 1 | 0 |
| NM_006312 | 1 | 1 | 1 | 1 | 1 | 0 |
| NM_006313 | 1 | 0 | 1 | 1 | 0 | 0 |
| NM_006314 | 1 | 1 | 1 | 1 | 0 | 1 |
| NM_006315 | 1 | 0 | 1 | 0 | 0 | 0 |

|           |   |   |   |   |   |   |
|-----------|---|---|---|---|---|---|
| NM_006316 | 1 | 0 | 1 | 0 | 0 | 0 |
| NM_006317 | 1 | 1 | 1 | 1 | 0 | 1 |
| NM_006319 | 1 | 1 | 1 | 1 | 0 | 0 |
| NM_006320 | 1 | 0 | 1 | 1 | 0 | 1 |
| NM_006321 | 1 | 0 | 1 | 1 | 1 | 1 |
| NM_006322 | 1 | 0 | 1 | 0 | 1 | 1 |
| NM_006323 | 1 | 0 | 1 | 0 | 0 | 0 |
| NM_006324 | 1 | 1 | 1 | 1 | 0 | 0 |
| NM_006325 | 1 | 0 | 1 | 0 | 0 | 1 |
| NM_006326 | 1 | 1 | 1 | 0 | 0 | 1 |
| NM_006327 | 1 | 0 | 1 | 0 | 0 | 0 |
| NM_006328 | 1 | 0 | 1 | 0 | 0 | 1 |
| NM_006329 | 1 | 0 | 1 | 1 | 0 | 1 |
| NM_006330 | 1 | 0 | 1 | 1 | 0 | 1 |
| NM_006331 | 1 | 0 | 1 | 0 | 0 | 0 |
| NM_006332 | 1 | 0 | 1 | 0 | 0 | 0 |
| NM_006333 | 1 | 0 | 1 | 0 | 0 | 1 |
| NM_006334 | 1 | 1 | 1 | 0 | 0 | 1 |
| NM_006335 | 1 | 0 | 1 | 0 | 0 | 1 |
| NM_006336 | 1 | 1 | 1 | 1 | 0 | 0 |
| NM_006337 | 1 | 0 | 1 | 1 | 0 | 1 |
| NM_006339 | 1 | 0 | 1 | 0 | 0 | 0 |
| NM_006340 | 1 | 1 | 1 | 1 | 0 | 1 |
| NM_006341 | 1 | 1 | 1 | 1 | 0 | 1 |
| NM_006342 | 1 | 0 | 1 | 0 | 1 | 0 |
| NM_006343 | 1 | 1 | 1 | 1 | 0 | 0 |
| NM_006344 | 1 | 0 | 1 | 1 | 1 | 1 |
| NM_006345 | 1 | 0 | 1 | 0 | 1 | 1 |
| NM_006346 | 1 | 1 | 1 | 1 | 1 | 1 |
| NM_006347 | 1 | 1 | 1 | 1 | 1 | 1 |
| NM_006348 | 1 | 0 | 1 | 0 | 0 | 1 |
| NM_006349 | 1 | 0 | 1 | 0 | 0 | 0 |
| NM_006350 | 1 | 1 | 1 | 0 | 0 | 1 |
| NM_006351 | 1 | 1 | 1 | 1 | 0 | 1 |
| NM_006352 | 1 | 1 | 1 | 1 | 0 | 1 |
| NM_006353 | 1 | 0 | 1 | 0 | 0 | 0 |
| NM_006354 | 1 | 0 | 1 | 0 | 0 | 0 |
| NM_006355 | 1 | 1 | 1 | 1 | 0 | 1 |
| NM_006356 | 1 | 1 | 1 | 1 | 1 | 1 |
| NM_006357 | 1 | 1 | 1 | 1 | 0 | 0 |
| NM_006358 | 1 | 1 | 1 | 1 | 0 | 1 |
| NM_006359 | 1 | 0 | 1 | 1 | 0 | 0 |
| NM_006360 | 1 | 1 | 1 | 1 | 1 | 1 |
| NM_006361 | 1 | 0 | 1 | 0 | 0 | 0 |
| NM_006362 | 1 | 1 | 1 | 1 | 0 | 1 |
| NM_006363 | 1 | 0 | 1 | 0 | 0 | 0 |
| NM_006364 | 1 | 0 | 1 | 0 | 0 | 0 |
| NM_006365 | 1 | 1 | 1 | 0 | 0 | 1 |
| NM_006367 | 1 | 1 | 1 | 1 | 1 | 1 |
| NM_006368 | 1 | 0 | 1 | 0 | 0 | 1 |
| NM_006369 | 1 | 1 | 1 | 1 | 0 | 1 |
| NM_006370 | 1 | 1 | 1 | 1 | 0 | 0 |

|           |   |   |   |   |   |   |
|-----------|---|---|---|---|---|---|
| NM_006371 | 1 | 1 | 1 | 1 | 0 | 0 |
| NM_006372 | 1 | 1 | 1 | 1 | 0 | 0 |
| NM_006373 | 1 | 1 | 1 | 1 | 0 | 0 |
| NM_006374 | 1 | 0 | 1 | 1 | 1 | 1 |
| NM_006375 | 1 | 1 | 1 | 0 | 0 | 1 |
| NM_006377 | 1 | 1 | 1 | 1 | 0 | 0 |
| NM_006378 | 1 | 0 | 1 | 1 | 1 | 1 |
| NM_006379 | 1 | 1 | 1 | 1 | 0 | 0 |
| NM_006380 | 1 | 0 | 1 | 1 | 0 | 0 |
| NM_006383 | 1 | 1 | 1 | 1 | 0 | 1 |
| NM_006384 | 1 | 0 | 1 | 0 | 1 | 1 |
| NM_006385 | 1 | 0 | 1 | 1 | 1 | 1 |
| NM_006387 | 1 | 0 | 1 | 0 | 0 | 0 |
| NM_006388 | 1 | 1 | 1 | 0 | 0 | 0 |
| NM_006389 | 1 | 0 | 1 | 0 | 0 | 0 |
| NM_006390 | 1 | 1 | 1 | 1 | 0 | 0 |
| NM_006391 | 1 | 0 | 1 | 0 | 0 | 0 |
| NM_006392 | 1 | 1 | 1 | 1 | 0 | 1 |
| NM_006393 | 1 | 0 | 1 | 0 | 1 | 1 |
| NM_006394 | 0 | 0 | 1 | 0 | 0 | 0 |
| NM_006395 | 1 | 1 | 1 | 1 | 0 | 1 |
| NM_006396 | 1 | 0 | 1 | 0 | 0 | 0 |
| NM_006397 | 1 | 0 | 1 | 0 | 0 | 0 |
| NM_006398 | 1 | 1 | 1 | 1 | 0 | 1 |
| NM_006399 | 1 | 1 | 1 | 1 | 1 | 1 |
| NM_006400 | 1 | 1 | 1 | 0 | 0 | 0 |
| NM_006401 | 1 | 1 | 1 | 1 | 0 | 1 |
| NM_006402 | 1 | 1 | 1 | 1 | 0 | 1 |
| NM_006403 | 1 | 1 | 1 | 1 | 0 | 1 |
| NM_006404 | 1 | 0 | 1 | 1 | 1 | 1 |
| NM_006405 | 1 | 0 | 1 | 1 | 0 | 0 |
| NM_006406 | 1 | 1 | 1 | 1 | 1 | 1 |
| NM_006407 | 1 | 0 | 1 | 0 | 0 | 1 |
| NM_006408 | 0 | 1 | 0 | 1 | 0 | 0 |
| NM_006409 | 1 | 0 | 1 | 1 | 0 | 0 |
| NM_006410 | 1 | 1 | 1 | 1 | 1 | 1 |
| NM_006412 | 1 | 0 | 1 | 1 | 0 | 0 |
| NM_006413 | 1 | 1 | 1 | 1 | 0 | 0 |
| NM_006414 | 1 | 1 | 1 | 1 | 0 | 0 |
| NM_006415 | 1 | 1 | 1 | 1 | 0 | 0 |
| NM_006416 | 1 | 1 | 1 | 1 | 0 | 1 |
| NM_006417 | 1 | 0 | 1 | 0 | 1 | 1 |
| NM_006418 | 1 | 0 | 1 | 1 | 0 | 1 |
| NM_006420 | 1 | 0 | 1 | 1 | 0 | 1 |
| NM_006421 | 1 | 1 | 1 | 1 | 0 | 0 |
| NM_006422 | 1 | 0 | 1 | 0 | 0 | 1 |
| NM_006423 | 1 | 0 | 1 | 1 | 1 | 0 |
| NM_006424 | 0 | 0 | 0 | 0 | 0 | 1 |
| NM_006425 | 1 | 0 | 1 | 1 | 0 | 0 |
| NM_006426 | 1 | 0 | 1 | 0 | 0 | 1 |
| NM_006428 | 1 | 0 | 1 | 0 | 0 | 0 |
| NM_006429 | 1 | 1 | 1 | 1 | 0 | 0 |

|           |   |   |   |   |   |   |
|-----------|---|---|---|---|---|---|
| NM_006430 | 1 | 0 | 1 | 1 | 0 | 0 |
| NM_006431 | 1 | 1 | 1 | 1 | 0 | 0 |
| NM_006432 | 1 | 1 | 1 | 0 | 0 | 1 |
| NM_006434 | 0 | 0 | 1 | 0 | 0 | 0 |
| NM_006435 | 1 | 1 | 0 | 0 | 0 | 0 |
| NM_006437 | 1 | 1 | 1 | 1 | 0 | 0 |
| NM_006438 | 1 | 0 | 1 | 1 | 0 | 0 |
| NM_006439 | 0 | 0 | 1 | 1 | 0 | 0 |
| NM_006441 | 1 | 1 | 1 | 1 | 1 | 1 |
| NM_006442 | 1 | 0 | 1 | 0 | 1 | 1 |
| NM_006443 | 1 | 1 | 1 | 1 | 0 | 1 |
| NM_006444 | 1 | 0 | 1 | 0 | 0 | 1 |
| NM_006445 | 1 | 0 | 1 | 0 | 1 | 0 |
| NM_006447 | 1 | 0 | 1 | 0 | 1 | 1 |
| NM_006449 | 1 | 0 | 1 | 0 | 0 | 0 |
| NM_006451 | 1 | 0 | 1 | 1 | 1 | 1 |
| NM_006452 | 1 | 1 | 1 | 1 | 0 | 1 |
| NM_006453 | 1 | 0 | 1 | 0 | 0 | 0 |
| NM_006454 | 1 | 0 | 1 | 1 | 0 | 0 |
| NM_006455 | 1 | 0 | 1 | 1 | 1 | 1 |
| NM_006456 | 1 | 1 | 1 | 1 | 0 | 1 |
| NM_006457 | 1 | 0 | 1 | 0 | 1 | 1 |
| NM_006458 | 1 | 0 | 1 | 0 | 0 | 0 |
| NM_006459 | 1 | 1 | 1 | 1 | 0 | 0 |
| NM_006460 | 1 | 0 | 1 | 1 | 0 | 0 |
| NM_006461 | 1 | 0 | 1 | 0 | 0 | 1 |
| NM_006462 | 1 | 0 | 1 | 1 | 0 | 0 |
| NM_006463 | 1 | 0 | 1 | 1 | 0 | 0 |
| NM_006464 | 1 | 1 | 1 | 1 | 1 | 1 |
| NM_006465 | 1 | 0 | 1 | 1 | 0 | 1 |
| NM_006466 | 1 | 0 | 1 | 1 | 1 | 1 |
| NM_006467 | 1 | 0 | 1 | 0 | 0 | 1 |
| NM_006468 | 1 | 0 | 1 | 1 | 1 | 1 |
| NM_006469 | 1 | 1 | 1 | 1 | 1 | 1 |
| NM_006470 | 1 | 1 | 1 | 1 | 0 | 0 |
| NM_006471 | 1 | 0 | 1 | 1 | 1 | 1 |
| NM_006472 | 1 | 1 | 1 | 1 | 0 | 1 |
| NM_006473 | 1 | 0 | 1 | 0 | 0 | 0 |
| NM_006475 | 0 | 0 | 0 | 1 | 0 | 1 |
| NM_006476 | 1 | 0 | 1 | 1 | 1 | 1 |
| NM_006477 | 1 | 1 | 1 | 0 | 0 | 1 |
| NM_006478 | 1 | 0 | 1 | 0 | 0 | 1 |
| NM_006479 | 1 | 1 | 1 | 1 | 0 | 0 |
| NM_006480 | 1 | 0 | 1 | 1 | 0 | 1 |
| NM_006481 | 1 | 0 | 1 | 0 | 0 | 0 |
| NM_006482 | 1 | 0 | 1 | 0 | 1 | 1 |
| NM_006484 | 1 | 0 | 1 | 1 | 0 | 0 |
| NM_006485 | 1 | 1 | 1 | 1 | 0 | 0 |
| NM_006486 | 1 | 0 | 1 | 0 | 0 | 0 |
| NM_006487 | 1 | 0 | 1 | 1 | 0 | 0 |
| NM_006491 | 1 | 1 | 1 | 1 | 0 | 0 |
| NM_006492 | 1 | 1 | 1 | 0 | 0 | 0 |

|           |   |   |   |   |   |   |
|-----------|---|---|---|---|---|---|
| NM_006493 | 1 | 1 | 1 | 1 | 0 | 0 |
| NM_006494 | 1 | 0 | 1 | 1 | 0 | 1 |
| NM_006495 | 1 | 0 | 1 | 1 | 1 | 1 |
| NM_006496 | 1 | 1 | 1 | 1 | 1 | 1 |
| NM_006497 | 1 | 0 | 1 | 1 | 1 | 0 |
| NM_006498 | 1 | 1 | 1 | 1 | 1 | 1 |
| NM_006499 | 1 | 0 | 1 | 0 | 1 | 0 |
| NM_006500 | 0 | 0 | 1 | 0 | 0 | 0 |
| NM_006501 | 1 | 0 | 1 | 0 | 0 | 1 |
| NM_006502 | 1 | 0 | 1 | 1 | 0 | 0 |
| NM_006503 | 1 | 0 | 1 | 0 | 0 | 1 |
| NM_006504 | 1 | 0 | 1 | 1 | 1 | 1 |
| NM_006505 | 1 | 1 | 1 | 1 | 1 | 1 |
| NM_006506 | 1 | 0 | 1 | 0 | 0 | 0 |
| NM_006508 | 1 | 0 | 0 | 0 | 0 | 1 |
| NM_006509 | 1 | 1 | 1 | 1 | 0 | 1 |
| NM_006510 | 1 | 0 | 1 | 0 | 0 | 0 |
| NM_006511 | 1 | 0 | 0 | 0 | 0 | 1 |
| NM_006512 | 1 | 0 | 1 | 0 | 0 | 0 |
| NM_006513 | 1 | 0 | 1 | 1 | 0 | 0 |
| NM_006514 | 0 | 0 | 0 | 0 | 0 | 1 |
| NM_006516 | 1 | 0 | 1 | 1 | 1 | 0 |
| NM_006517 | 1 | 0 | 1 | 0 | 0 | 1 |
| NM_006519 | 1 | 1 | 1 | 1 | 1 | 1 |
| NM_006520 | 1 | 0 | 1 | 0 | 0 | 0 |
| NM_006521 | 1 | 0 | 1 | 1 | 1 | 1 |
| NM_006522 | 1 | 1 | 1 | 1 | 0 | 0 |
| NM_006526 | 1 | 0 | 1 | 1 | 0 | 0 |
| NM_006527 | 1 | 0 | 1 | 0 | 0 | 0 |
| NM_006528 | 1 | 0 | 1 | 0 | 0 | 0 |
| NM_006529 | 1 | 0 | 0 | 0 | 0 | 0 |
| NM_006530 | 1 | 0 | 1 | 1 | 0 | 1 |
| NM_006531 | 1 | 1 | 1 | 1 | 1 | 0 |
| NM_006532 | 1 | 0 | 1 | 1 | 1 | 0 |
| NM_006533 | 1 | 0 | 1 | 0 | 1 | 1 |
| NM_006534 | 1 | 0 | 1 | 0 | 0 | 0 |
| NM_006537 | 1 | 0 | 1 | 1 | 0 | 0 |
| NM_006539 | 1 | 0 | 0 | 0 | 0 | 1 |
| NM_006540 | 1 | 1 | 1 | 1 | 0 | 1 |
| NM_006541 | 1 | 0 | 1 | 0 | 0 | 0 |
| NM_006542 | 1 | 0 | 1 | 0 | 0 | 0 |
| NM_006544 | 1 | 0 | 1 | 0 | 0 | 0 |
| NM_006545 | 1 | 1 | 1 | 1 | 0 | 1 |
| NM_006547 | 1 | 1 | 1 | 1 | 1 | 1 |
| NM_006548 | 1 | 1 | 1 | 1 | 0 | 0 |
| NM_006549 | 1 | 1 | 1 | 1 | 1 | 1 |
| NM_006550 | 1 | 0 | 1 | 1 | 0 | 0 |
| NM_006551 | 0 | 0 | 0 | 0 | 0 | 1 |
| NM_006553 | 1 | 0 | 1 | 0 | 1 | 0 |
| NM_006554 | 1 | 0 | 1 | 1 | 1 | 1 |
| NM_006555 | 1 | 0 | 1 | 0 | 0 | 0 |
| NM_006556 | 1 | 0 | 1 | 0 | 0 | 0 |

|           |   |   |   |   |   |   |
|-----------|---|---|---|---|---|---|
| NM_006557 | 1 | 0 | 1 | 0 | 0 | 1 |
| NM_006558 | 1 | 1 | 1 | 1 | 0 | 1 |
| NM_006559 | 1 | 1 | 1 | 1 | 1 | 1 |
| NM_006560 | 1 | 1 | 1 | 0 | 0 | 0 |
| NM_006561 | 1 | 0 | 1 | 0 | 0 | 1 |
| NM_006562 | 0 | 0 | 0 | 0 | 0 | 1 |
| NM_006563 | 1 | 0 | 1 | 0 | 0 | 0 |
| NM_006564 | 1 | 1 | 1 | 1 | 0 | 1 |
| NM_006565 | 1 | 1 | 1 | 1 | 1 | 0 |
| NM_006566 | 1 | 1 | 1 | 1 | 0 | 0 |
| NM_006567 | 1 | 0 | 1 | 1 | 0 | 0 |
| NM_006568 | 1 | 0 | 1 | 0 | 0 | 0 |
| NM_006569 | 1 | 0 | 1 | 0 | 0 | 0 |
| NM_006570 | 1 | 0 | 1 | 0 | 0 | 0 |
| NM_006571 | 1 | 0 | 1 | 1 | 0 | 0 |
| NM_006572 | 1 | 1 | 1 | 1 | 0 | 0 |
| NM_006573 | 1 | 1 | 1 | 1 | 1 | 1 |
| NM_006574 | 0 | 0 | 0 | 0 | 0 | 1 |
| NM_006575 | 1 | 0 | 1 | 0 | 0 | 0 |
| NM_006576 | 1 | 1 | 1 | 1 | 0 | 1 |
| NM_006577 | 1 | 0 | 1 | 1 | 0 | 0 |
| NM_006578 | 1 | 0 | 1 | 0 | 0 | 1 |
| NM_006579 | 1 | 1 | 1 | 1 | 0 | 1 |
| NM_006580 | 1 | 1 | 1 | 1 | 0 | 0 |
| NM_006583 | 1 | 0 | 1 | 0 | 0 | 1 |
| NM_006584 | 1 | 1 | 1 | 1 | 1 | 1 |
| NM_006585 | 1 | 0 | 1 | 1 | 0 | 0 |
| NM_006586 | 1 | 1 | 1 | 1 | 0 | 1 |
| NM_006587 | 1 | 0 | 1 | 0 | 0 | 1 |
| NM_006589 | 1 | 1 | 1 | 1 | 1 | 1 |
| NM_006590 | 1 | 0 | 1 | 0 | 0 | 1 |
| NM_006594 | 1 | 0 | 1 | 0 | 0 | 0 |
| NM_006595 | 1 | 0 | 1 | 0 | 0 | 0 |
| NM_006596 | 1 | 0 | 1 | 0 | 0 | 1 |
| NM_006597 | 1 | 1 | 1 | 1 | 1 | 1 |
| NM_006598 | 1 | 0 | 1 | 0 | 0 | 1 |
| NM_006600 | 1 | 0 | 1 | 0 | 0 | 0 |
| NM_006601 | 1 | 0 | 1 | 0 | 0 | 1 |
| NM_006602 | 1 | 0 | 1 | 0 | 1 | 1 |
| NM_006603 | 1 | 0 | 1 | 0 | 1 | 1 |
| NM_006604 | 1 | 0 | 1 | 0 | 0 | 0 |
| NM_006605 | 1 | 0 | 1 | 0 | 1 | 0 |
| NM_006606 | 1 | 0 | 1 | 0 | 0 | 1 |
| NM_006607 | 1 | 0 | 1 | 0 | 1 | 1 |
| NM_006608 | 1 | 0 | 1 | 1 | 0 | 0 |
| NM_006609 | 1 | 1 | 1 | 1 | 0 | 0 |
| NM_006610 | 1 | 0 | 0 | 0 | 0 | 0 |
| NM_006611 | 1 | 0 | 1 | 0 | 0 | 0 |
| NM_006612 | 1 | 0 | 1 | 0 | 1 | 1 |
| NM_006613 | 1 | 0 | 1 | 0 | 0 | 0 |
| NM_006614 | 1 | 0 | 1 | 0 | 0 | 1 |
| NM_006618 | 1 | 0 | 1 | 0 | 0 | 1 |

|           |   |   |   |   |   |   |
|-----------|---|---|---|---|---|---|
| NM_006620 | 1 | 1 | 1 | 1 | 0 | 1 |
| NM_006621 | 1 | 0 | 1 | 0 | 0 | 0 |
| NM_006622 | 1 | 0 | 1 | 0 | 1 | 1 |
| NM_006623 | 1 | 1 | 1 | 1 | 0 | 1 |
| NM_006624 | 1 | 0 | 1 | 0 | 1 | 0 |
| NM_006625 | 1 | 0 | 1 | 0 | 0 | 0 |
| NM_006626 | 1 | 0 | 1 | 0 | 0 | 0 |
| NM_006627 | 1 | 0 | 1 | 1 | 0 | 0 |
| NM_006628 | 1 | 0 | 1 | 1 | 0 | 1 |
| NM_006629 | 1 | 0 | 1 | 0 | 0 | 0 |
| NM_006630 | 1 | 0 | 1 | 1 | 0 | 1 |
| NM_006631 | 1 | 0 | 1 | 0 | 1 | 0 |
| NM_006632 | 1 | 0 | 1 | 0 | 0 | 1 |
| NM_006633 | 1 | 1 | 1 | 1 | 0 | 1 |
| NM_006634 | 1 | 1 | 1 | 1 | 0 | 0 |
| NM_006636 | 1 | 1 | 1 | 1 | 1 | 1 |
| NM_006637 | 0 | 0 | 1 | 0 | 0 | 0 |
| NM_006638 | 1 | 1 | 1 | 1 | 0 | 1 |
| NM_006639 | 1 | 0 | 1 | 0 | 1 | 1 |
| NM_006640 | 1 | 1 | 1 | 1 | 0 | 0 |
| NM_006641 | 1 | 0 | 1 | 0 | 0 | 1 |
| NM_006642 | 1 | 0 | 1 | 0 | 0 | 1 |
| NM_006643 | 1 | 1 | 1 | 1 | 0 | 1 |
| NM_006644 | 1 | 0 | 1 | 1 | 0 | 0 |
| NM_006645 | 1 | 0 | 1 | 1 | 1 | 1 |
| NM_006646 | 1 | 0 | 1 | 0 | 0 | 0 |
| NM_006648 | 1 | 0 | 1 | 0 | 0 | 0 |
| NM_006649 | 1 | 1 | 1 | 1 | 0 | 0 |
| NM_006650 | 1 | 0 | 0 | 0 | 0 | 0 |
| NM_006653 | 1 | 1 | 1 | 1 | 1 | 0 |
| NM_006654 | 1 | 1 | 1 | 1 | 0 | 0 |
| NM_006656 | 0 | 0 | 0 | 0 | 0 | 1 |
| NM_006657 | 1 | 0 | 1 | 0 | 0 | 1 |
| NM_006658 | 1 | 1 | 1 | 1 | 1 | 1 |
| NM_006659 | 1 | 1 | 1 | 1 | 0 | 0 |
| NM_006660 | 1 | 1 | 1 | 0 | 0 | 0 |
| NM_006661 | 1 | 0 | 1 | 0 | 0 | 1 |
| NM_006662 | 1 | 0 | 1 | 0 | 0 | 1 |
| NM_006663 | 1 | 0 | 1 | 0 | 1 | 0 |
| NM_006664 | 1 | 0 | 1 | 0 | 0 | 0 |
| NM_006665 | 1 | 1 | 1 | 1 | 1 | 1 |
| NM_006666 | 1 | 1 | 1 | 0 | 0 | 0 |
| NM_006667 | 1 | 0 | 1 | 0 | 1 | 1 |
| NM_006668 | 1 | 0 | 1 | 1 | 0 | 0 |
| NM_006669 | 1 | 0 | 1 | 1 | 1 | 1 |
| NM_006670 | 1 | 1 | 1 | 0 | 1 | 1 |
| NM_006671 | 1 | 1 | 1 | 1 | 1 | 1 |
| NM_006672 | 1 | 1 | 1 | 0 | 0 | 1 |
| NM_006675 | 1 | 0 | 1 | 0 | 0 | 1 |
| NM_006676 | 1 | 0 | 1 | 1 | 0 | 0 |
| NM_006678 | 1 | 1 | 1 | 1 | 1 | 1 |
| NM_006680 | 1 | 0 | 1 | 0 | 0 | 1 |

|           |   |   |   |   |   |   |
|-----------|---|---|---|---|---|---|
| NM_006681 | 1 | 0 | 1 | 0 | 0 | 0 |
| NM_006682 | 1 | 1 | 1 | 1 | 1 | 1 |
| NM_006683 | 0 | 0 | 1 | 0 | 0 | 0 |
| NM_006684 | 1 | 0 | 0 | 0 | 0 | 1 |
| NM_006685 | 1 | 0 | 0 | 0 | 0 | 1 |
| NM_006686 | 1 | 0 | 1 | 0 | 0 | 0 |
| NM_006687 | 1 | 1 | 1 | 1 | 1 | 1 |
| NM_006688 | 1 | 0 | 1 | 0 | 0 | 0 |
| NM_006690 | 0 | 0 | 1 | 0 | 0 | 0 |
| NM_006691 | 1 | 1 | 1 | 1 | 0 | 0 |
| NM_006692 | 1 | 0 | 1 | 1 | 0 | 1 |
| NM_006693 | 1 | 1 | 1 | 1 | 0 | 0 |
| NM_006694 | 1 | 1 | 1 | 1 | 1 | 1 |
| NM_006695 | 0 | 0 | 0 | 0 | 0 | 1 |
| NM_006696 | 1 | 1 | 1 | 1 | 0 | 0 |
| NM_006697 | 1 | 1 | 1 | 1 | 0 | 0 |
| NM_006698 | 1 | 0 | 1 | 1 | 0 | 0 |
| NM_006699 | 1 | 0 | 1 | 0 | 0 | 0 |
| NM_006700 | 1 | 0 | 1 | 0 | 1 | 1 |
| NM_006701 | 1 | 0 | 1 | 0 | 0 | 0 |
| NM_006702 | 1 | 0 | 1 | 0 | 0 | 0 |
| NM_006703 | 1 | 1 | 1 | 1 | 1 | 1 |
| NM_006704 | 1 | 0 | 1 | 0 | 0 | 1 |
| NM_006705 | 1 | 1 | 1 | 1 | 1 | 1 |
| NM_006706 | 1 | 1 | 1 | 1 | 0 | 0 |
| NM_006707 | 1 | 1 | 1 | 1 | 0 | 1 |
| NM_006708 | 1 | 1 | 1 | 1 | 0 | 0 |
| NM_006710 | 1 | 0 | 1 | 1 | 0 | 0 |
| NM_006711 | 1 | 0 | 1 | 0 | 0 | 0 |
| NM_006712 | 1 | 1 | 1 | 1 | 1 | 1 |
| NM_006713 | 1 | 1 | 1 | 1 | 0 | 0 |
| NM_006714 | 1 | 1 | 1 | 1 | 1 | 1 |
| NM_006715 | 1 | 1 | 1 | 1 | 1 | 1 |
| NM_006716 | 1 | 0 | 1 | 0 | 0 | 1 |
| NM_006717 | 1 | 0 | 1 | 1 | 0 | 1 |
| NM_006718 | 1 | 1 | 1 | 1 | 0 | 0 |
| NM_006719 | 1 | 1 | 1 | 1 | 1 | 1 |
| NM_006721 | 1 | 1 | 1 | 1 | 0 | 1 |
| NM_006725 | 1 | 0 | 1 | 0 | 0 | 1 |
| NM_006726 | 1 | 0 | 1 | 1 | 0 | 0 |
| NM_006729 | 1 | 1 | 1 | 1 | 1 | 1 |
| NM_006730 | 1 | 1 | 1 | 1 | 0 | 0 |
| NM_006731 | 1 | 0 | 1 | 1 | 0 | 0 |
| NM_006732 | 1 | 1 | 1 | 1 | 1 | 1 |
| NM_006733 | 0 | 1 | 1 | 0 | 0 | 0 |
| NM_006734 | 1 | 1 | 1 | 1 | 0 | 0 |
| NM_006735 | 1 | 0 | 1 | 0 | 0 | 1 |
| NM_006736 | 1 | 0 | 1 | 1 | 1 | 0 |
| NM_006737 | 1 | 1 | 1 | 1 | 0 | 0 |
| NM_006739 | 1 | 0 | 1 | 0 | 0 | 0 |
| NM_006741 | 1 | 0 | 0 | 0 | 0 | 0 |
| NM_006742 | 1 | 0 | 1 | 0 | 0 | 0 |



|           |   |   |   |   |   |   |
|-----------|---|---|---|---|---|---|
| NM_006743 | 1 | 1 | 1 | 1 | 1 | 1 |
| NM_006745 | 1 | 0 | 1 | 0 | 0 | 1 |
| NM_006746 | 1 | 1 | 1 | 1 | 1 | 1 |
| NM_006747 | 1 | 1 | 1 | 1 | 0 | 1 |
| NM_006748 | 1 | 1 | 1 | 1 | 0 | 1 |
| NM_006749 | 1 | 1 | 1 | 1 | 1 | 1 |
| NM_006750 | 1 | 1 | 1 | 1 | 0 | 1 |
| NM_006751 | 1 | 0 | 1 | 0 | 1 | 0 |
| NM_006752 | 1 | 1 | 1 | 1 | 0 | 0 |
| NM_006753 | 1 | 0 | 1 | 0 | 0 | 0 |
| NM_006755 | 1 | 1 | 0 | 0 | 0 | 0 |
| NM_006756 | 1 | 0 | 1 | 0 | 1 | 0 |
| NM_006757 | 1 | 0 | 1 | 0 | 0 | 0 |
| NM_006758 | 1 | 0 | 1 | 0 | 0 | 1 |
| NM_006759 | 1 | 0 | 1 | 0 | 0 | 0 |
| NM_006760 | 1 | 1 | 1 | 1 | 0 | 0 |
| NM_006761 | 1 | 0 | 1 | 1 | 0 | 0 |
| NM_006762 | 1 | 1 | 1 | 1 | 0 | 1 |
| NM_006763 | 1 | 1 | 1 | 1 | 1 | 1 |
| NM_006764 | 1 | 1 | 1 | 1 | 0 | 1 |
| NM_006765 | 1 | 0 | 1 | 0 | 0 | 0 |
| NM_006766 | 1 | 1 | 1 | 1 | 0 | 1 |
| NM_006767 | 1 | 0 | 1 | 0 | 0 | 0 |
| NM_006768 | 1 | 0 | 1 | 1 | 0 | 0 |
| NM_006769 | 1 | 0 | 1 | 0 | 1 | 1 |
| NM_006770 | 1 | 1 | 1 | 1 | 1 | 1 |
| NM_006771 | 1 | 0 | 1 | 0 | 0 | 1 |
| NM_006773 | 1 | 0 | 1 | 1 | 0 | 0 |
| NM_006777 | 1 | 0 | 1 | 0 | 0 | 0 |
| NM_006778 | 1 | 0 | 1 | 0 | 0 | 1 |
| NM_006779 | 1 | 1 | 1 | 1 | 0 | 0 |
| NM_006780 | 1 | 0 | 1 | 0 | 0 | 0 |
| NM_006782 | 1 | 0 | 1 | 1 | 0 | 0 |
| NM_006783 | 1 | 0 | 1 | 0 | 0 | 0 |
| NM_006784 | 1 | 0 | 1 | 0 | 0 | 1 |
| NM_006786 | 1 | 0 | 1 | 0 | 0 | 0 |
| NM_006787 | 1 | 0 | 1 | 0 | 0 | 0 |
| NM_006788 | 1 | 1 | 1 | 1 | 1 | 1 |
| NM_006789 | 0 | 0 | 0 | 0 | 0 | 1 |
| NM_006790 | 1 | 0 | 1 | 0 | 0 | 0 |
| NM_006791 | 1 | 0 | 1 | 1 | 0 | 0 |
| NM_006792 | 1 | 1 | 1 | 1 | 0 | 0 |
| NM_006793 | 1 | 1 | 1 | 0 | 1 | 1 |
| NM_006794 | 1 | 0 | 1 | 0 | 0 | 0 |
| NM_006795 | 1 | 1 | 1 | 1 | 0 | 0 |
| NM_006796 | 1 | 1 | 1 | 1 | 1 | 1 |
| NM_006798 | 0 | 0 | 0 | 0 | 0 | 1 |
| NM_006799 | 1 | 1 | 1 | 1 | 0 | 1 |
| NM_006800 | 1 | 0 | 1 | 0 | 0 | 0 |
| NM_006801 | 1 | 1 | 1 | 1 | 0 | 0 |
| NM_006802 | 1 | 1 | 1 | 1 | 0 | 0 |
| NM_006803 | 1 | 1 | 1 | 1 | 1 | 1 |

|           |   |   |   |   |   |   |
|-----------|---|---|---|---|---|---|
| NM_006804 | 1 | 0 | 1 | 0 | 0 | 0 |
| NM_006805 | 1 | 1 | 1 | 0 | 0 | 0 |
| NM_006806 | 1 | 0 | 1 | 0 | 1 | 1 |
| NM_006807 | 1 | 0 | 1 | 0 | 1 | 1 |
| NM_006808 | 1 | 1 | 1 | 0 | 0 | 0 |
| NM_006809 | 1 | 0 | 1 | 1 | 0 | 1 |
| NM_006810 | 1 | 1 | 1 | 1 | 0 | 0 |
| NM_006811 | 1 | 0 | 1 | 1 | 0 | 0 |
| NM_006812 | 1 | 0 | 1 | 1 | 1 | 1 |
| NM_006813 | 1 | 0 | 1 | 0 | 1 | 1 |
| NM_006814 | 1 | 0 | 1 | 1 | 0 | 0 |
| NM_006815 | 1 | 0 | 1 | 1 | 0 | 0 |
| NM_006816 | 1 | 0 | 1 | 1 | 1 | 1 |
| NM_006817 | 1 | 0 | 1 | 0 | 0 | 0 |
| NM_006818 | 1 | 1 | 1 | 1 | 1 | 1 |
| NM_006819 | 1 | 1 | 1 | 1 | 1 | 1 |
| NM_006820 | 1 | 0 | 1 | 0 | 0 | 0 |
| NM_006821 | 1 | 0 | 1 | 1 | 0 | 1 |
| NM_006822 | 1 | 1 | 1 | 1 | 0 | 0 |
| NM_006823 | 1 | 1 | 1 | 1 | 1 | 1 |
| NM_006824 | 1 | 1 | 1 | 1 | 0 | 1 |
| NM_006825 | 1 | 0 | 1 | 1 | 1 | 1 |
| NM_006826 | 1 | 0 | 1 | 0 | 0 | 0 |
| NM_006827 | 1 | 1 | 1 | 1 | 0 | 1 |
| NM_006828 | 1 | 0 | 1 | 1 | 0 | 1 |
| NM_006829 | 1 | 1 | 1 | 1 | 0 | 1 |
| NM_006830 | 1 | 0 | 1 | 0 | 1 | 1 |
| NM_006831 | 1 | 1 | 1 | 1 | 0 | 1 |
| NM_006832 | 1 | 0 | 1 | 0 | 0 | 0 |
| NM_006833 | 1 | 0 | 1 | 0 | 0 | 0 |
| NM_006834 | 1 | 0 | 1 | 0 | 0 | 1 |
| NM_006835 | 1 | 0 | 1 | 0 | 0 | 1 |
| NM_006837 | 1 | 0 | 1 | 0 | 1 | 1 |
| NM_006838 | 1 | 0 | 1 | 1 | 0 | 1 |
| NM_006839 | 1 | 1 | 1 | 1 | 0 | 0 |
| NM_006840 | 1 | 1 | 1 | 1 | 0 | 1 |
| NM_006841 | 0 | 0 | 1 | 0 | 0 | 0 |
| NM_006842 | 1 | 0 | 1 | 0 | 0 | 0 |
| NM_006843 | 1 | 0 | 1 | 1 | 0 | 0 |
| NM_006845 | 1 | 0 | 1 | 0 | 1 | 1 |
| NM_006847 | 1 | 1 | 1 | 1 | 1 | 1 |
| NM_006848 | 1 | 1 | 1 | 1 | 0 | 0 |
| NM_006849 | 1 | 0 | 1 | 0 | 0 | 1 |
| NM_006850 | 1 | 1 | 1 | 1 | 0 | 0 |
| NM_006851 | 1 | 1 | 1 | 1 | 1 | 1 |
| NM_006852 | 1 | 1 | 1 | 1 | 0 | 0 |
| NM_006853 | 1 | 1 | 1 | 1 | 0 | 0 |
| NM_006854 | 1 | 1 | 1 | 1 | 0 | 1 |
| NM_006856 | 1 | 0 | 1 | 0 | 0 | 0 |
| NM_006857 | 1 | 0 | 1 | 0 | 0 | 0 |
| NM_006858 | 1 | 0 | 1 | 0 | 0 | 0 |
| NM_006859 | 1 | 0 | 1 | 1 | 1 | 1 |

|           |   |   |   |   |   |   |
|-----------|---|---|---|---|---|---|
| NM_006860 | 1 | 0 | 1 | 0 | 0 | 1 |
| NM_006861 | 1 | 0 | 1 | 0 | 0 | 0 |
| NM_006862 | 1 | 0 | 1 | 0 | 0 | 1 |
| NM_006863 | 1 | 1 | 1 | 1 | 1 | 1 |
| NM_006864 | 1 | 0 | 1 | 1 | 1 | 1 |
| NM_006865 | 1 | 1 | 1 | 1 | 0 | 1 |
| NM_006866 | 1 | 0 | 1 | 0 | 0 | 0 |
| NM_006867 | 0 | 0 | 0 | 0 | 0 | 1 |
| NM_006868 | 1 | 1 | 1 | 1 | 1 | 1 |
| NM_006869 | 1 | 0 | 1 | 0 | 0 | 0 |
| NM_006870 | 1 | 0 | 1 | 0 | 1 | 0 |
| NM_006871 | 1 | 1 | 1 | 1 | 0 | 1 |
| NM_006872 | 1 | 1 | 1 | 0 | 0 | 0 |
| NM_006873 | 1 | 0 | 1 | 0 | 0 | 0 |
| NM_006874 | 1 | 1 | 0 | 0 | 0 | 1 |
| NM_006875 | 1 | 0 | 1 | 0 | 1 | 1 |
| NM_006876 | 1 | 1 | 1 | 1 | 0 | 1 |
| NM_006877 | 1 | 0 | 1 | 0 | 0 | 1 |
| NM_006878 | 1 | 1 | 1 | 1 | 0 | 0 |
| NM_006879 | 1 | 1 | 1 | 1 | 0 | 0 |
| NM_006880 | 1 | 1 | 1 | 1 | 0 | 0 |
| NM_006881 | 1 | 1 | 1 | 1 | 0 | 0 |
| NM_006882 | 1 | 1 | 1 | 1 | 0 | 0 |
| NM_006883 | 1 | 0 | 0 | 0 | 0 | 1 |
| NM_006884 | 1 | 1 | 1 | 1 | 0 | 0 |
| NM_006885 | 1 | 1 | 1 | 1 | 0 | 1 |
| NM_006886 | 1 | 0 | 1 | 0 | 0 | 0 |
| NM_006887 | 1 | 1 | 1 | 1 | 0 | 0 |
| NM_006888 | 1 | 0 | 1 | 0 | 0 | 0 |
| NM_006889 | 1 | 1 | 1 | 1 | 0 | 0 |
| NM_006890 | 1 | 0 | 1 | 0 | 0 | 1 |
| NM_006891 | 0 | 0 | 1 | 0 | 0 | 0 |
| NM_006892 | 1 | 0 | 1 | 1 | 0 | 0 |
| NM_006893 | 1 | 1 | 1 | 1 | 1 | 1 |
| NM_006895 | 1 | 1 | 1 | 1 | 1 | 1 |
| NM_006896 | 1 | 0 | 1 | 0 | 0 | 0 |
| NM_006897 | 1 | 1 | 1 | 0 | 0 | 0 |
| NM_006898 | 1 | 0 | 1 | 0 | 0 | 0 |
| NM_006900 | 1 | 0 | 1 | 0 | 0 | 0 |
| NM_006901 | 1 | 0 | 1 | 1 | 0 | 0 |
| NM_006902 | 1 | 0 | 1 | 0 | 0 | 1 |
| NM_006904 | 1 | 1 | 1 | 1 | 0 | 1 |
| NM_006905 | 1 | 0 | 1 | 0 | 0 | 0 |
| NM_006907 | 1 | 0 | 1 | 1 | 0 | 0 |
| NM_006908 | 1 | 1 | 1 | 1 | 0 | 0 |
| NM_006911 | 1 | 0 | 1 | 1 | 0 | 0 |
| NM_006912 | 1 | 0 | 1 | 1 | 0 | 0 |
| NM_006913 | 1 | 0 | 1 | 0 | 0 | 0 |
| NM_006915 | 1 | 1 | 1 | 1 | 1 | 1 |
| NM_006916 | 1 | 1 | 1 | 1 | 0 | 1 |
| NM_006917 | 1 | 0 | 1 | 1 | 0 | 0 |
| NM_006918 | 1 | 1 | 1 | 1 | 0 | 0 |

|           |   |   |   |   |   |   |
|-----------|---|---|---|---|---|---|
| NM_006919 | 0 | 1 | 0 | 0 | 0 | 0 |
| NM_006922 | 1 | 0 | 1 | 1 | 0 | 0 |
| NM_006923 | 1 | 1 | 1 | 1 | 0 | 0 |
| NM_006924 | 1 | 1 | 1 | 1 | 0 | 1 |
| NM_006925 | 1 | 0 | 1 | 1 | 0 | 0 |
| NM_006926 | 0 | 0 | 1 | 1 | 0 | 0 |
| NM_006927 | 1 | 1 | 1 | 1 | 0 | 0 |
| NM_006928 | 1 | 1 | 1 | 1 | 0 | 0 |
| NM_006929 | 1 | 0 | 1 | 0 | 0 | 0 |
| NM_006930 | 1 | 0 | 1 | 0 | 0 | 1 |
| NM_006931 | 1 | 1 | 1 | 1 | 1 | 1 |
| NM_006932 | 1 | 0 | 1 | 0 | 0 | 0 |
| NM_006933 | 1 | 1 | 1 | 0 | 0 | 1 |
| NM_006934 | 1 | 0 | 0 | 0 | 0 | 1 |
| NM_006936 | 1 | 1 | 1 | 1 | 0 | 1 |
| NM_006937 | 1 | 0 | 1 | 0 | 0 | 0 |
| NM_006938 | 1 | 0 | 1 | 0 | 0 | 0 |
| NM_006940 | 1 | 0 | 0 | 0 | 0 | 1 |
| NM_006941 | 1 | 1 | 1 | 1 | 0 | 0 |
| NM_006942 | 1 | 1 | 1 | 1 | 1 | 1 |
| NM_006943 | 1 | 0 | 1 | 0 | 0 | 0 |
| NM_006944 | 0 | 0 | 0 | 0 | 0 | 1 |
| NM_006945 | 1 | 0 | 1 | 1 | 0 | 0 |
| NM_006946 | 1 | 0 | 1 | 0 | 0 | 1 |
| NM_006947 | 1 | 1 | 1 | 1 | 0 | 0 |
| NM_006948 | 1 | 0 | 1 | 0 | 1 | 0 |
| NM_006949 | 1 | 0 | 1 | 1 | 0 | 0 |
| NM_006950 | 1 | 0 | 1 | 0 | 0 | 0 |
| NM_006952 | 1 | 1 | 0 | 0 | 0 | 1 |
| NM_006953 | 1 | 1 | 1 | 1 | 0 | 1 |
| NM_006958 | 1 | 0 | 1 | 1 | 0 | 0 |
| NM_006961 | 1 | 0 | 1 | 0 | 0 | 0 |
| NM_006963 | 1 | 0 | 1 | 1 | 0 | 0 |
| NM_006965 | 1 | 0 | 1 | 0 | 0 | 0 |
| NM_006973 | 1 | 0 | 1 | 1 | 0 | 0 |
| NM_006977 | 1 | 1 | 1 | 1 | 0 | 1 |
| NM_006978 | 1 | 0 | 1 | 1 | 0 | 0 |
| NM_006979 | 1 | 0 | 1 | 0 | 0 | 0 |
| NM_006980 | 1 | 0 | 1 | 1 | 0 | 0 |
| NM_006982 | 1 | 0 | 0 | 0 | 0 | 0 |
| NM_006983 | 1 | 0 | 1 | 0 | 1 | 0 |
| NM_006984 | 1 | 0 | 1 | 0 | 0 | 0 |
| NM_006985 | 1 | 0 | 1 | 1 | 1 | 1 |
| NM_006986 | 1 | 0 | 1 | 0 | 0 | 1 |
| NM_006987 | 1 | 1 | 1 | 1 | 0 | 1 |
| NM_006988 | 1 | 0 | 1 | 0 | 1 | 1 |
| NM_006989 | 1 | 1 | 1 | 1 | 0 | 0 |
| NM_006990 | 1 | 0 | 1 | 0 | 0 | 0 |
| NM_006991 | 1 | 1 | 1 | 0 | 0 | 1 |
| NM_006993 | 1 | 0 | 1 | 0 | 0 | 1 |
| NM_006994 | 1 | 0 | 1 | 1 | 0 | 1 |
| NM_006996 | 1 | 0 | 1 | 0 | 0 | 0 |

|           |   |   |   |   |   |   |
|-----------|---|---|---|---|---|---|
| NM_006997 | 1 | 0 | 0 | 0 | 0 | 0 |
| NM_006998 | 1 | 1 | 1 | 1 | 0 | 0 |
| NM_006999 | 1 | 0 | 1 | 1 | 0 | 0 |
| NM_007000 | 1 | 0 | 1 | 0 | 0 | 0 |
| NM_007005 | 1 | 1 | 1 | 1 | 0 | 1 |
| NM_007006 | 1 | 0 | 1 | 0 | 1 | 1 |
| NM_007007 | 1 | 0 | 1 | 0 | 0 | 0 |
| NM_007008 | 1 | 0 | 1 | 1 | 1 | 0 |
| NM_007010 | 1 | 0 | 1 | 0 | 0 | 0 |
| NM_007011 | 1 | 1 | 1 | 1 | 0 | 1 |
| NM_007013 | 1 | 1 | 1 | 1 | 0 | 1 |
| NM_007014 | 1 | 1 | 1 | 1 | 1 | 1 |
| NM_007015 | 1 | 1 | 1 | 0 | 0 | 0 |
| NM_007017 | 0 | 0 | 1 | 0 | 0 | 0 |
| NM_007018 | 1 | 1 | 1 | 1 | 1 | 1 |
| NM_007019 | 1 | 1 | 1 | 1 | 1 | 1 |
| NM_007021 | 0 | 1 | 0 | 0 | 0 | 1 |
| NM_007022 | 1 | 1 | 1 | 1 | 0 | 0 |
| NM_007023 | 1 | 0 | 0 | 0 | 0 | 0 |
| NM_007024 | 1 | 1 | 1 | 1 | 0 | 0 |
| NM_007026 | 1 | 0 | 1 | 0 | 0 | 1 |
| NM_007027 | 1 | 0 | 1 | 0 | 0 | 1 |
| NM_007028 | 1 | 1 | 1 | 0 | 0 | 1 |
| NM_007030 | 1 | 0 | 1 | 0 | 0 | 0 |
| NM_007031 | 1 | 0 | 0 | 0 | 0 | 0 |
| NM_007032 | 1 | 0 | 1 | 1 | 0 | 0 |
| NM_007033 | 1 | 1 | 1 | 1 | 0 | 0 |
| NM_007034 | 1 | 0 | 1 | 0 | 0 | 1 |
| NM_007035 | 1 | 1 | 1 | 1 | 0 | 0 |
| NM_007036 | 1 | 0 | 1 | 0 | 0 | 1 |
| NM_007037 | 0 | 0 | 1 | 0 | 0 | 1 |
| NM_007038 | 1 | 1 | 1 | 1 | 1 | 1 |
| NM_007041 | 1 | 0 | 1 | 0 | 0 | 0 |
| NM_007042 | 1 | 0 | 1 | 0 | 0 | 1 |
| NM_007043 | 1 | 1 | 1 | 0 | 1 | 1 |
| NM_007044 | 1 | 0 | 1 | 1 | 0 | 1 |
| NM_007045 | 1 | 1 | 1 | 1 | 0 | 1 |
| NM_007046 | 1 | 0 | 1 | 0 | 0 | 0 |
| NM_007047 | 1 | 0 | 1 | 0 | 0 | 1 |
| NM_007048 | 1 | 1 | 1 | 1 | 0 | 0 |
| NM_007049 | 1 | 0 | 1 | 1 | 1 | 1 |
| NM_007052 | 0 | 0 | 1 | 0 | 0 | 0 |
| NM_007053 | 1 | 1 | 1 | 1 | 0 | 0 |
| NM_007054 | 1 | 0 | 1 | 0 | 0 | 1 |
| NM_007055 | 1 | 0 | 1 | 0 | 0 | 0 |
| NM_007056 | 1 | 0 | 1 | 0 | 0 | 1 |
| NM_007058 | 1 | 0 | 1 | 1 | 0 | 0 |
| NM_007059 | 1 | 0 | 1 | 0 | 0 | 0 |
| NM_007062 | 1 | 1 | 1 | 1 | 0 | 0 |
| NM_007063 | 1 | 1 | 1 | 1 | 1 | 1 |
| NM_007064 | 0 | 0 | 1 | 0 | 0 | 0 |
| NM_007065 | 1 | 0 | 1 | 0 | 0 | 1 |

|           |   |   |   |   |   |   |
|-----------|---|---|---|---|---|---|
| NM_007066 | 1 | 0 | 1 | 0 | 0 | 1 |
| NM_007067 | 1 | 1 | 1 | 1 | 0 | 0 |
| NM_007068 | 1 | 0 | 1 | 0 | 0 | 0 |
| NM_007069 | 1 | 0 | 1 | 0 | 0 | 1 |
| NM_007070 | 1 | 0 | 1 | 1 | 1 | 1 |
| NM_007071 | 1 | 0 | 1 | 0 | 0 | 0 |
| NM_007074 | 1 | 1 | 1 | 0 | 1 | 1 |
| NM_007075 | 1 | 0 | 1 | 0 | 0 | 0 |
| NM_007076 | 1 | 0 | 1 | 1 | 0 | 0 |
| NM_007077 | 1 | 0 | 1 | 0 | 0 | 0 |
| NM_007079 | 1 | 0 | 1 | 0 | 0 | 0 |
| NM_007080 | 1 | 0 | 1 | 0 | 0 | 0 |
| NM_007081 | 1 | 0 | 1 | 1 | 0 | 0 |
| NM_007083 | 1 | 1 | 1 | 1 | 0 | 0 |
| NM_007084 | 1 | 0 | 1 | 1 | 0 | 0 |
| NM_007085 | 1 | 0 | 1 | 0 | 0 | 0 |
| NM_007086 | 1 | 0 | 1 | 0 | 0 | 1 |
| NM_007088 | 1 | 0 | 0 | 0 | 0 | 0 |
| NM_007096 | 0 | 0 | 0 | 0 | 0 | 1 |
| NM_007097 | 1 | 0 | 1 | 0 | 0 | 0 |
| NM_007098 | 1 | 1 | 1 | 0 | 1 | 1 |
| NM_007100 | 1 | 1 | 1 | 0 | 0 | 0 |
| NM_007101 | 1 | 1 | 1 | 1 | 0 | 0 |
| NM_007102 | 1 | 1 | 1 | 1 | 0 | 0 |
| NM_007103 | 1 | 0 | 1 | 0 | 0 | 1 |
| NM_007104 | 1 | 0 | 1 | 1 | 1 | 1 |
| NM_007105 | 1 | 1 | 1 | 1 | 0 | 1 |
| NM_007106 | 1 | 1 | 1 | 0 | 1 | 1 |
| NM_007107 | 1 | 0 | 1 | 1 | 0 | 0 |
| NM_007108 | 1 | 1 | 1 | 1 | 0 | 1 |
| NM_007109 | 1 | 0 | 1 | 1 | 0 | 0 |
| NM_007110 | 1 | 0 | 1 | 0 | 0 | 1 |
| NM_007111 | 1 | 0 | 1 | 0 | 0 | 1 |
| NM_007112 | 1 | 0 | 1 | 1 | 1 | 0 |
| NM_007113 | 1 | 1 | 1 | 1 | 0 | 0 |
| NM_007114 | 1 | 0 | 1 | 1 | 1 | 1 |
| NM_007115 | 1 | 1 | 1 | 1 | 1 | 1 |
| NM_007116 | 1 | 0 | 1 | 1 | 0 | 0 |
| NM_007118 | 1 | 1 | 1 | 1 | 0 | 0 |
| NM_007120 | 1 | 0 | 1 | 0 | 0 | 1 |
| NM_007121 | 1 | 1 | 1 | 1 | 0 | 1 |
| NM_007122 | 1 | 0 | 1 | 0 | 0 | 1 |
| NM_007123 | 0 | 0 | 0 | 0 | 0 | 1 |
| NM_007124 | 1 | 0 | 1 | 0 | 0 | 0 |
| NM_007125 | 1 | 1 | 1 | 1 | 0 | 0 |
| NM_007126 | 1 | 0 | 1 | 1 | 1 | 1 |
| NM_007127 | 1 | 1 | 1 | 0 | 0 | 0 |
| NM_007128 | 1 | 1 | 1 | 1 | 0 | 1 |
| NM_007129 | 1 | 0 | 1 | 0 | 1 | 1 |
| NM_007131 | 1 | 0 | 1 | 0 | 1 | 1 |
| NM_007135 | 1 | 1 | 1 | 1 | 0 | 0 |
| NM_007136 | 1 | 0 | 1 | 0 | 0 | 1 |

|           |   |   |   |   |   |   |
|-----------|---|---|---|---|---|---|
| NM_007144 | 1 | 0 | 1 | 0 | 0 | 1 |
| NM_007145 | 1 | 1 | 1 | 1 | 0 | 0 |
| NM_007146 | 1 | 0 | 1 | 1 | 0 | 0 |
| NM_007147 | 1 | 0 | 1 | 0 | 0 | 0 |
| NM_007148 | 1 | 0 | 1 | 0 | 0 | 0 |
| NM_007149 | 1 | 1 | 1 | 1 | 0 | 0 |
| NM_007150 | 1 | 1 | 1 | 1 | 0 | 0 |
| NM_007152 | 1 | 0 | 1 | 0 | 0 | 0 |
| NM_007153 | 1 | 1 | 1 | 1 | 0 | 1 |
| NM_007155 | 1 | 0 | 1 | 0 | 0 | 1 |
| NM_007156 | 1 | 1 | 1 | 0 | 0 | 1 |
| NM_007158 | 1 | 0 | 1 | 0 | 1 | 1 |
| NM_007159 | 1 | 0 | 1 | 1 | 0 | 0 |
| NM_007160 | 1 | 0 | 1 | 0 | 0 | 0 |
| NM_007161 | 1 | 0 | 1 | 1 | 1 | 1 |
| NM_007162 | 1 | 0 | 1 | 0 | 0 | 0 |
| NM_007165 | 1 | 0 | 1 | 0 | 0 | 0 |
| NM_007166 | 1 | 1 | 1 | 1 | 0 | 1 |
| NM_007167 | 1 | 1 | 1 | 1 | 0 | 1 |
| NM_007168 | 0 | 1 | 0 | 0 | 0 | 1 |
| NM_007169 | 1 | 1 | 1 | 1 | 0 | 0 |
| NM_007170 | 1 | 1 | 1 | 1 | 0 | 0 |
| NM_007171 | 1 | 1 | 1 | 1 | 1 | 1 |
| NM_007172 | 1 | 1 | 1 | 1 | 1 | 1 |
| NM_007173 | 1 | 1 | 1 | 1 | 1 | 1 |
| NM_007174 | 1 | 0 | 1 | 0 | 0 | 0 |
| NM_007175 | 1 | 0 | 1 | 0 | 0 | 1 |
| NM_007176 | 1 | 0 | 0 | 0 | 0 | 0 |
| NM_007177 | 1 | 0 | 1 | 0 | 0 | 0 |
| NM_007178 | 1 | 0 | 1 | 0 | 1 | 1 |
| NM_007181 | 1 | 0 | 1 | 1 | 0 | 1 |
| NM_007182 | 1 | 0 | 1 | 0 | 1 | 0 |
| NM_007183 | 1 | 0 | 1 | 0 | 0 | 0 |
| NM_007184 | 1 | 1 | 1 | 1 | 0 | 0 |
| NM_007186 | 1 | 0 | 1 | 0 | 1 | 1 |
| NM_007187 | 1 | 0 | 1 | 0 | 0 | 0 |
| NM_007188 | 1 | 0 | 1 | 0 | 0 | 0 |
| NM_007189 | 1 | 0 | 1 | 1 | 0 | 1 |
| NM_007190 | 1 | 0 | 1 | 0 | 0 | 0 |
| NM_007191 | 0 | 0 | 0 | 0 | 0 | 1 |
| NM_007192 | 1 | 0 | 1 | 1 | 0 | 1 |
| NM_007193 | 0 | 0 | 0 | 0 | 0 | 1 |
| NM_007194 | 1 | 1 | 1 | 0 | 0 | 1 |
| NM_007195 | 1 | 0 | 1 | 0 | 1 | 1 |
| NM_007196 | 1 | 0 | 1 | 0 | 0 | 1 |
| NM_007197 | 1 | 0 | 1 | 0 | 0 | 0 |
| NM_007198 | 1 | 0 | 1 | 0 | 0 | 1 |
| NM_007199 | 1 | 1 | 1 | 1 | 0 | 1 |
| NM_007200 | 1 | 0 | 1 | 0 | 0 | 1 |
| NM_007202 | 1 | 0 | 1 | 0 | 0 | 0 |
| NM_007203 | 1 | 1 | 1 | 1 | 0 | 1 |
| NM_007204 | 1 | 0 | 1 | 1 | 0 | 0 |

|           |   |   |   |   |   |   |
|-----------|---|---|---|---|---|---|
| NM_007207 | 1 | 1 | 1 | 1 | 0 | 0 |
| NM_007208 | 1 | 1 | 1 | 1 | 0 | 0 |
| NM_007209 | 1 | 0 | 1 | 1 | 1 | 1 |
| NM_007210 | 1 | 1 | 1 | 1 | 0 | 0 |
| NM_007211 | 1 | 0 | 1 | 1 | 0 | 1 |
| NM_007212 | 1 | 1 | 1 | 1 | 0 | 0 |
| NM_007213 | 1 | 0 | 1 | 0 | 0 | 1 |
| NM_007214 | 1 | 1 | 1 | 1 | 0 | 0 |
| NM_007215 | 1 | 0 | 1 | 1 | 0 | 0 |
| NM_007218 | 1 | 0 | 1 | 1 | 0 | 0 |
| NM_007219 | 1 | 1 | 1 | 1 | 1 | 1 |
| NM_007220 | 1 | 1 | 1 | 1 | 0 | 0 |
| NM_007221 | 1 | 0 | 1 | 1 | 1 | 0 |
| NM_007222 | 1 | 0 | 1 | 1 | 0 | 1 |
| NM_007223 | 1 | 0 | 1 | 1 | 0 | 0 |
| NM_007225 | 1 | 0 | 0 | 0 | 0 | 1 |
| NM_007227 | 1 | 1 | 1 | 1 | 0 | 0 |
| NM_007229 | 1 | 1 | 1 | 1 | 0 | 1 |
| NM_007230 | 1 | 0 | 1 | 1 | 1 | 0 |
| NM_007232 | 1 | 0 | 1 | 0 | 0 | 0 |
| NM_007233 | 1 | 0 | 1 | 0 | 0 | 1 |
| NM_007235 | 1 | 1 | 1 | 1 | 0 | 1 |
| NM_007236 | 1 | 1 | 1 | 1 | 0 | 1 |
| NM_007237 | 1 | 1 | 1 | 1 | 0 | 0 |
| NM_007238 | 1 | 0 | 1 | 1 | 0 | 0 |
| NM_007240 | 1 | 0 | 1 | 1 | 0 | 0 |
| NM_007241 | 1 | 1 | 1 | 0 | 0 | 0 |
| NM_007242 | 1 | 1 | 1 | 1 | 0 | 0 |
| NM_007243 | 1 | 1 | 1 | 1 | 1 | 1 |
| NM_007244 | 1 | 1 | 1 | 1 | 1 | 1 |
| NM_007245 | 1 | 1 | 1 | 1 | 1 | 1 |
| NM_007246 | 1 | 1 | 1 | 1 | 1 | 1 |
| NM_007247 | 1 | 0 | 1 | 1 | 0 | 0 |
| NM_007249 | 1 | 0 | 1 | 1 | 0 | 0 |
| NM_007250 | 1 | 0 | 1 | 0 | 0 | 1 |
| NM_007252 | 0 | 0 | 1 | 0 | 0 | 0 |
| NM_007253 | 1 | 0 | 1 | 0 | 0 | 0 |
| NM_007254 | 1 | 0 | 1 | 1 | 0 | 0 |
| NM_007255 | 1 | 0 | 1 | 1 | 1 | 0 |
| NM_007256 | 1 | 0 | 1 | 0 | 0 | 0 |
| NM_007257 | 1 | 0 | 1 | 0 | 0 | 0 |
| NM_007258 | 1 | 1 | 1 | 1 | 1 | 1 |
| NM_007259 | 1 | 0 | 1 | 1 | 0 | 1 |
| NM_007260 | 1 | 0 | 1 | 0 | 0 | 0 |
| NM_007261 | 1 | 0 | 1 | 0 | 0 | 1 |
| NM_007262 | 1 | 0 | 1 | 0 | 0 | 1 |
| NM_007263 | 1 | 0 | 1 | 1 | 0 | 0 |
| NM_007264 | 1 | 1 | 1 | 1 | 0 | 1 |
| NM_007265 | 1 | 0 | 1 | 0 | 0 | 0 |
| NM_007266 | 1 | 0 | 1 | 1 | 0 | 0 |
| NM_007267 | 1 | 0 | 1 | 1 | 0 | 1 |
| NM_007268 | 1 | 1 | 1 | 1 | 1 | 1 |



|           |   |   |   |   |   |   |
|-----------|---|---|---|---|---|---|
| NM_007269 | 1 | 1 | 1 | 1 | 0 | 0 |
| NM_007270 | 1 | 0 | 1 | 1 | 0 | 0 |
| NM_007271 | 1 | 1 | 1 | 1 | 0 | 0 |
| NM_007272 | 1 | 1 | 1 | 1 | 0 | 0 |
| NM_007273 | 1 | 1 | 1 | 1 | 0 | 1 |
| NM_007274 | 1 | 1 | 1 | 1 | 0 | 1 |
| NM_007275 | 1 | 1 | 1 | 1 | 1 | 1 |
| NM_007277 | 1 | 0 | 1 | 0 | 0 | 1 |
| NM_007278 | 1 | 1 | 1 | 1 | 0 | 1 |
| NM_007279 | 1 | 1 | 1 | 0 | 0 | 1 |
| NM_007280 | 1 | 1 | 1 | 0 | 0 | 1 |
| NM_007281 | 1 | 1 | 1 | 1 | 0 | 1 |
| NM_007282 | 1 | 1 | 1 | 1 | 1 | 1 |
| NM_007283 | 1 | 0 | 1 | 0 | 0 | 1 |
| NM_007284 | 1 | 0 | 1 | 1 | 1 | 1 |
| NM_007285 | 1 | 1 | 1 | 1 | 0 | 1 |
| NM_007286 | 1 | 0 | 1 | 0 | 0 | 0 |
| NM_007288 | 1 | 1 | 1 | 1 | 1 | 1 |
| NM_007289 | 1 | 1 | 1 | 1 | 1 | 1 |
| NM_007292 | 1 | 1 | 1 | 1 | 1 | 1 |
| NM_007293 | 1 | 1 | 1 | 1 | 0 | 0 |
| NM_007300 | 1 | 1 | 1 | 1 | 0 | 0 |
| NM_007308 | 1 | 1 | 1 | 1 | 1 | 1 |
| NM_007309 | 1 | 1 | 1 | 1 | 0 | 0 |
| NM_007310 | 1 | 1 | 1 | 1 | 1 | 1 |
| NM_007311 | 1 | 1 | 1 | 1 | 1 | 1 |
| NM_007315 | 1 | 1 | 1 | 0 | 1 | 1 |
| NM_007317 | 1 | 0 | 1 | 1 | 1 | 1 |
| NM_007318 | 1 | 1 | 1 | 1 | 0 | 1 |
| NM_007319 | 1 | 1 | 1 | 1 | 0 | 0 |
| NM_007320 | 1 | 0 | 1 | 0 | 0 | 0 |
| NM_007321 | 1 | 0 | 1 | 0 | 0 | 0 |
| NM_007322 | 1 | 0 | 1 | 1 | 0 | 0 |
| NM_007324 | 1 | 1 | 1 | 0 | 0 | 0 |
| NM_007326 | 1 | 0 | 1 | 0 | 0 | 1 |
| NM_007327 | 1 | 0 | 1 | 1 | 0 | 0 |
| NM_007328 | 1 | 0 | 1 | 0 | 1 | 1 |
| NM_007331 | 1 | 0 | 1 | 0 | 0 | 1 |
| NM_007333 | 1 | 0 | 1 | 0 | 1 | 0 |
| NM_007334 | 1 | 1 | 1 | 1 | 1 | 0 |
| NM_007341 | 1 | 0 | 1 | 0 | 0 | 1 |
| NM_007342 | 1 | 1 | 1 | 1 | 0 | 0 |
| NM_007344 | 1 | 0 | 1 | 1 | 0 | 1 |
| NM_007345 | 1 | 0 | 1 | 0 | 1 | 1 |
| NM_007346 | 1 | 0 | 1 | 0 | 1 | 1 |
| NM_007347 | 1 | 0 | 1 | 0 | 1 | 0 |
| NM_007348 | 1 | 1 | 1 | 1 | 0 | 1 |
| NM_007349 | 1 | 0 | 1 | 0 | 0 | 0 |
| NM_007350 | 1 | 0 | 1 | 0 | 0 | 1 |
| NM_007351 | 1 | 1 | 1 | 1 | 0 | 1 |
| NM_007352 | 0 | 0 | 0 | 0 | 0 | 1 |
| NM_007353 | 1 | 0 | 1 | 0 | 0 | 0 |

|           |   |   |   |   |   |   |
|-----------|---|---|---|---|---|---|
| NM_007354 | 1 | 1 | 1 | 1 | 0 | 0 |
| NM_007355 | 1 | 1 | 1 | 1 | 0 | 1 |
| NM_007357 | 1 | 1 | 1 | 1 | 0 | 0 |
| NM_007358 | 1 | 0 | 1 | 0 | 0 | 0 |
| NM_007359 | 1 | 1 | 1 | 1 | 0 | 1 |
| NM_007360 | 1 | 0 | 1 | 1 | 1 | 1 |
| NM_007361 | 1 | 0 | 1 | 1 | 0 | 1 |
| NM_007362 | 1 | 1 | 1 | 1 | 0 | 0 |
| NM_007363 | 1 | 1 | 1 | 1 | 0 | 1 |
| NM_007364 | 1 | 1 | 1 | 1 | 1 | 1 |
| NM_007365 | 1 | 1 | 1 | 1 | 0 | 0 |
| NM_007367 | 1 | 0 | 1 | 0 | 1 | 0 |
| NM_007368 | 1 | 0 | 1 | 0 | 0 | 0 |
| NM_007369 | 1 | 1 | 1 | 0 | 0 | 0 |
| NM_007370 | 1 | 1 | 1 | 1 | 0 | 1 |
| NM_007371 | 1 | 0 | 1 | 0 | 0 | 0 |
| NM_007372 | 1 | 0 | 1 | 1 | 0 | 0 |
| NM_007373 | 1 | 1 | 1 | 1 | 0 | 0 |
| NM_007374 | 0 | 0 | 0 | 0 | 0 | 1 |
| NM_007375 | 1 | 1 | 1 | 1 | 0 | 0 |
| NM_009586 | 1 | 1 | 1 | 1 | 0 | 0 |
| NM_009587 | 1 | 0 | 1 | 0 | 1 | 1 |
| NM_009589 | 1 | 0 | 1 | 1 | 0 | 1 |
| NM_009590 | 1 | 1 | 1 | 1 | 0 | 1 |
| NM_012062 | 1 | 0 | 1 | 0 | 0 | 0 |
| NM_012064 | 1 | 0 | 1 | 0 | 0 | 1 |
| NM_012067 | 1 | 0 | 1 | 0 | 0 | 1 |
| NM_012068 | 1 | 1 | 1 | 0 | 1 | 1 |
| NM_012069 | 1 | 0 | 1 | 1 | 0 | 0 |
| NM_012070 | 1 | 1 | 1 | 1 | 0 | 1 |
| NM_012071 | 1 | 0 | 1 | 0 | 1 | 1 |
| NM_012072 | 1 | 1 | 1 | 1 | 0 | 1 |
| NM_012073 | 1 | 1 | 1 | 0 | 0 | 0 |
| NM_012074 | 1 | 0 | 1 | 0 | 1 | 0 |
| NM_012075 | 1 | 1 | 1 | 1 | 1 | 0 |
| NM_012076 | 1 | 1 | 1 | 0 | 0 | 0 |
| NM_012079 | 1 | 0 | 1 | 1 | 0 | 1 |
| NM_012080 | 1 | 1 | 1 | 1 | 1 | 1 |
| NM_012081 | 1 | 1 | 1 | 1 | 1 | 1 |
| NM_012082 | 0 | 0 | 0 | 0 | 0 | 1 |
| NM_012083 | 1 | 1 | 1 | 1 | 0 | 0 |
| NM_012084 | 1 | 0 | 1 | 0 | 0 | 1 |
| NM_012086 | 1 | 0 | 1 | 1 | 1 | 1 |
| NM_012087 | 1 | 1 | 1 | 1 | 0 | 0 |
| NM_012088 | 1 | 0 | 1 | 0 | 0 | 1 |
| NM_012089 | 1 | 0 | 1 | 1 | 0 | 1 |
| NM_012090 | 1 | 0 | 1 | 1 | 1 | 1 |
| NM_012091 | 1 | 1 | 1 | 0 | 1 | 1 |
| NM_012092 | 1 | 1 | 1 | 1 | 0 | 0 |
| NM_012093 | 1 | 1 | 1 | 1 | 1 | 0 |
| NM_012094 | 1 | 0 | 1 | 1 | 0 | 0 |
| NM_012095 | 1 | 0 | 1 | 1 | 1 | 1 |

|           |   |   |   |   |   |   |
|-----------|---|---|---|---|---|---|
| NM_012096 | 1 | 0 | 1 | 1 | 1 | 0 |
| NM_012098 | 1 | 0 | 1 | 0 | 0 | 1 |
| NM_012100 | 1 | 0 | 1 | 1 | 0 | 1 |
| NM_012101 | 1 | 0 | 0 | 0 | 0 | 0 |
| NM_012102 | 1 | 0 | 1 | 1 | 1 | 1 |
| NM_012103 | 1 | 0 | 1 | 0 | 0 | 0 |
| NM_012104 | 1 | 0 | 1 | 1 | 0 | 0 |
| NM_012105 | 1 | 1 | 1 | 1 | 0 | 1 |
| NM_012106 | 1 | 0 | 1 | 1 | 0 | 0 |
| NM_012107 | 1 | 1 | 1 | 1 | 0 | 1 |
| NM_012108 | 1 | 0 | 1 | 1 | 1 | 0 |
| NM_012109 | 1 | 1 | 1 | 1 | 0 | 0 |
| NM_012110 | 1 | 0 | 1 | 1 | 1 | 1 |
| NM_012111 | 1 | 0 | 1 | 0 | 0 | 1 |
| NM_012112 | 1 | 1 | 1 | 0 | 0 | 0 |
| NM_012113 | 1 | 0 | 1 | 0 | 0 | 1 |
| NM_012114 | 1 | 0 | 0 | 0 | 0 | 1 |
| NM_012115 | 1 | 0 | 1 | 1 | 1 | 1 |
| NM_012117 | 1 | 0 | 1 | 0 | 0 | 1 |
| NM_012118 | 1 | 0 | 0 | 0 | 0 | 1 |
| NM_012119 | 1 | 0 | 1 | 1 | 1 | 1 |
| NM_012120 | 1 | 0 | 1 | 1 | 0 | 0 |
| NM_012121 | 1 | 0 | 1 | 1 | 0 | 0 |
| NM_012122 | 1 | 0 | 0 | 0 | 0 | 0 |
| NM_012123 | 1 | 0 | 1 | 0 | 1 | 0 |
| NM_012124 | 1 | 0 | 1 | 0 | 0 | 0 |
| NM_012125 | 1 | 0 | 1 | 0 | 0 | 0 |
| NM_012126 | 1 | 1 | 1 | 1 | 0 | 0 |
| NM_012127 | 1 | 1 | 1 | 1 | 1 | 1 |
| NM_012128 | 1 | 1 | 1 | 1 | 1 | 0 |
| NM_012129 | 1 | 0 | 1 | 1 | 0 | 0 |
| NM_012131 | 1 | 0 | 0 | 0 | 0 | 1 |
| NM_012133 | 1 | 1 | 1 | 1 | 0 | 0 |
| NM_012134 | 1 | 0 | 1 | 0 | 1 | 1 |
| NM_012135 | 1 | 0 | 1 | 1 | 0 | 0 |
| NM_012137 | 1 | 0 | 1 | 0 | 0 | 1 |
| NM_012138 | 1 | 1 | 1 | 1 | 0 | 0 |
| NM_012139 | 1 | 1 | 1 | 1 | 0 | 0 |
| NM_012140 | 1 | 0 | 1 | 1 | 0 | 0 |
| NM_012141 | 1 | 0 | 1 | 0 | 0 | 0 |
| NM_012142 | 1 | 1 | 1 | 1 | 0 | 0 |
| NM_012143 | 1 | 1 | 1 | 1 | 1 | 0 |
| NM_012144 | 1 | 0 | 1 | 1 | 0 | 0 |
| NM_012145 | 1 | 1 | 1 | 1 | 0 | 1 |
| NM_012146 | 1 | 0 | 1 | 1 | 1 | 0 |
| NM_012147 | 1 | 0 | 1 | 0 | 0 | 1 |
| NM_012148 | 1 | 0 | 1 | 0 | 0 | 0 |
| NM_012149 | 1 | 1 | 1 | 0 | 0 | 0 |
| NM_012151 | 1 | 0 | 1 | 0 | 0 | 1 |
| NM_012152 | 1 | 0 | 0 | 0 | 0 | 0 |
| NM_012154 | 1 | 1 | 1 | 1 | 0 | 0 |
| NM_012155 | 1 | 0 | 1 | 1 | 0 | 0 |

|           |   |   |   |   |   |   |
|-----------|---|---|---|---|---|---|
| NM_012156 | 1 | 1 | 1 | 1 | 0 | 0 |
| NM_012157 | 1 | 0 | 0 | 0 | 0 | 0 |
| NM_012158 | 1 | 0 | 1 | 0 | 0 | 0 |
| NM_012160 | 1 | 0 | 1 | 0 | 1 | 0 |
| NM_012161 | 1 | 0 | 1 | 1 | 0 | 0 |
| NM_012162 | 1 | 0 | 1 | 0 | 1 | 0 |
| NM_012163 | 1 | 0 | 1 | 0 | 0 | 0 |
| NM_012164 | 1 | 0 | 1 | 0 | 0 | 0 |
| NM_012165 | 1 | 0 | 1 | 0 | 0 | 0 |
| NM_012167 | 1 | 0 | 1 | 0 | 0 | 0 |
| NM_012168 | 1 | 0 | 1 | 0 | 1 | 0 |
| NM_012170 | 1 | 0 | 0 | 0 | 0 | 0 |
| NM_012172 | 1 | 0 | 1 | 0 | 0 | 0 |
| NM_012173 | 1 | 1 | 1 | 1 | 0 | 0 |
| NM_012174 | 1 | 0 | 1 | 1 | 0 | 0 |
| NM_012175 | 1 | 0 | 1 | 0 | 1 | 1 |
| NM_012176 | 1 | 0 | 1 | 1 | 0 | 0 |
| NM_012177 | 1 | 0 | 1 | 0 | 0 | 1 |
| NM_012179 | 1 | 0 | 1 | 1 | 1 | 0 |
| NM_012180 | 1 | 1 | 1 | 1 | 0 | 0 |
| NM_012181 | 1 | 1 | 1 | 0 | 0 | 1 |
| NM_012182 | 1 | 1 | 1 | 1 | 0 | 0 |
| NM_012183 | 1 | 0 | 1 | 0 | 0 | 0 |
| NM_012184 | 0 | 1 | 0 | 0 | 0 | 0 |
| NM_012185 | 1 | 1 | 1 | 1 | 0 | 0 |
| NM_012186 | 1 | 0 | 1 | 1 | 0 | 0 |
| NM_012188 | 1 | 0 | 0 | 0 | 0 | 0 |
| NM_012189 | 1 | 0 | 1 | 1 | 0 | 0 |
| NM_012191 | 1 | 0 | 1 | 0 | 0 | 1 |
| NM_012192 | 1 | 0 | 0 | 0 | 0 | 0 |
| NM_012193 | 1 | 0 | 1 | 0 | 0 | 0 |
| NM_012196 | 1 | 1 | 1 | 1 | 0 | 1 |
| NM_012197 | 1 | 0 | 1 | 1 | 0 | 0 |
| NM_012198 | 1 | 0 | 1 | 1 | 0 | 0 |
| NM_012199 | 1 | 0 | 1 | 0 | 0 | 1 |
| NM_012200 | 1 | 1 | 1 | 1 | 0 | 0 |
| NM_012201 | 1 | 0 | 1 | 1 | 0 | 1 |
| NM_012203 | 1 | 1 | 1 | 1 | 0 | 1 |
| NM_012204 | 1 | 0 | 1 | 1 | 0 | 0 |
| NM_012205 | 1 | 0 | 1 | 1 | 0 | 0 |
| NM_012206 | 0 | 0 | 0 | 0 | 0 | 1 |
| NM_012207 | 1 | 1 | 1 | 1 | 0 | 0 |
| NM_012208 | 1 | 0 | 1 | 0 | 0 | 0 |
| NM_012210 | 1 | 1 | 1 | 1 | 1 | 1 |
| NM_012212 | 1 | 0 | 1 | 0 | 0 | 0 |
| NM_012213 | 1 | 1 | 1 | 1 | 1 | 1 |
| NM_012214 | 1 | 1 | 1 | 1 | 0 | 0 |
| NM_012215 | 1 | 1 | 1 | 1 | 0 | 0 |
| NM_012216 | 1 | 0 | 1 | 0 | 0 | 0 |
| NM_012217 | 1 | 0 | 0 | 0 | 0 | 1 |
| NM_012218 | 1 | 1 | 1 | 1 | 0 | 1 |
| NM_012219 | 1 | 0 | 1 | 1 | 0 | 0 |

|           |   |   |   |   |   |   |
|-----------|---|---|---|---|---|---|
| NM_012222 | 1 | 0 | 1 | 1 | 1 | 1 |
| NM_012225 | 1 | 0 | 1 | 1 | 0 | 0 |
| NM_012227 | 1 | 1 | 1 | 1 | 0 | 0 |
| NM_012228 | 1 | 1 | 1 | 1 | 0 | 1 |
| NM_012229 | 1 | 1 | 1 | 1 | 0 | 1 |
| NM_012230 | 1 | 0 | 1 | 0 | 0 | 1 |
| NM_012231 | 1 | 0 | 1 | 1 | 0 | 0 |
| NM_012232 | 1 | 1 | 1 | 1 | 0 | 0 |
| NM_012234 | 1 | 0 | 1 | 1 | 0 | 0 |
| NM_012235 | 1 | 1 | 1 | 1 | 0 | 0 |
| NM_012236 | 1 | 1 | 1 | 1 | 0 | 0 |
| NM_012237 | 1 | 0 | 1 | 1 | 0 | 0 |
| NM_012238 | 1 | 0 | 1 | 0 | 0 | 0 |
| NM_012239 | 1 | 0 | 1 | 1 | 1 | 1 |
| NM_012240 | 1 | 1 | 1 | 1 | 0 | 1 |
| NM_012241 | 1 | 1 | 1 | 1 | 1 | 1 |
| NM_012243 | 1 | 0 | 1 | 1 | 1 | 1 |
| NM_012244 | 1 | 1 | 1 | 1 | 0 | 0 |
| NM_012245 | 1 | 0 | 1 | 0 | 0 | 0 |
| NM_012247 | 1 | 0 | 1 | 1 | 0 | 1 |
| NM_012248 | 1 | 1 | 1 | 1 | 0 | 0 |
| NM_012249 | 1 | 1 | 1 | 1 | 1 | 1 |
| NM_012250 | 1 | 0 | 1 | 1 | 0 | 1 |
| NM_012251 | 1 | 1 | 1 | 1 | 0 | 1 |
| NM_012252 | 1 | 1 | 1 | 1 | 1 | 1 |
| NM_012253 | 1 | 1 | 1 | 0 | 1 | 1 |
| NM_012254 | 1 | 1 | 1 | 1 | 1 | 1 |
| NM_012255 | 1 | 0 | 1 | 1 | 0 | 1 |
| NM_012256 | 1 | 0 | 1 | 1 | 0 | 0 |
| NM_012257 | 1 | 1 | 1 | 1 | 1 | 1 |
| NM_012258 | 1 | 1 | 1 | 1 | 0 | 1 |
| NM_012259 | 1 | 0 | 0 | 0 | 0 | 0 |
| NM_012260 | 1 | 0 | 1 | 1 | 1 | 1 |
| NM_012261 | 1 | 1 | 1 | 1 | 1 | 0 |
| NM_012262 | 1 | 1 | 1 | 1 | 1 | 1 |
| NM_012263 | 1 | 0 | 1 | 1 | 0 | 0 |
| NM_012264 | 1 | 1 | 1 | 1 | 0 | 1 |
| NM_012265 | 1 | 0 | 1 | 0 | 0 | 1 |
| NM_012266 | 1 | 0 | 1 | 1 | 0 | 0 |
| NM_012267 | 1 | 1 | 1 | 1 | 0 | 1 |
| NM_012268 | 1 | 1 | 1 | 1 | 0 | 0 |
| NM_012269 | 1 | 0 | 1 | 0 | 0 | 0 |
| NM_012271 | 1 | 1 | 1 | 1 | 0 | 0 |
| NM_012272 | 1 | 1 | 1 | 1 | 0 | 0 |
| NM_012276 | 1 | 1 | 1 | 1 | 0 | 0 |
| NM_012278 | 0 | 0 | 0 | 0 | 0 | 1 |
| NM_012280 | 1 | 1 | 1 | 1 | 0 | 0 |
| NM_012281 | 1 | 0 | 1 | 0 | 0 | 1 |
| NM_012282 | 1 | 0 | 1 | 0 | 1 | 1 |
| NM_012283 | 1 | 0 | 1 | 1 | 0 | 0 |
| NM_012285 | 1 | 1 | 1 | 1 | 0 | 0 |
| NM_012286 | 1 | 0 | 1 | 0 | 0 | 0 |

|           |   |   |   |   |   |   |
|-----------|---|---|---|---|---|---|
| NM_012287 | 1 | 0 | 1 | 1 | 1 | 1 |
| NM_012288 | 1 | 0 | 1 | 0 | 0 | 0 |
| NM_012289 | 1 | 1 | 1 | 1 | 0 | 1 |
| NM_012290 | 1 | 0 | 1 | 0 | 1 | 1 |
| NM_012291 | 1 | 1 | 1 | 0 | 1 | 1 |
| NM_012295 | 1 | 1 | 1 | 1 | 0 | 0 |
| NM_012296 | 1 | 1 | 1 | 1 | 1 | 1 |
| NM_012297 | 1 | 0 | 1 | 1 | 1 | 0 |
| NM_012301 | 1 | 1 | 1 | 0 | 0 | 0 |
| NM_012305 | 1 | 0 | 1 | 0 | 0 | 1 |
| NM_012306 | 1 | 0 | 1 | 0 | 0 | 0 |
| NM_012307 | 1 | 1 | 1 | 1 | 1 | 1 |
| NM_012308 | 1 | 0 | 1 | 0 | 0 | 0 |
| NM_012309 | 1 | 1 | 1 | 1 | 0 | 0 |
| NM_012310 | 1 | 0 | 1 | 0 | 1 | 1 |
| NM_012311 | 1 | 0 | 1 | 1 | 0 | 0 |
| NM_012312 | 1 | 1 | 1 | 1 | 1 | 1 |
| NM_012313 | 1 | 1 | 1 | 0 | 0 | 0 |
| NM_012314 | 1 | 1 | 1 | 1 | 1 | 0 |
| NM_012316 | 1 | 0 | 1 | 0 | 0 | 0 |
| NM_012317 | 1 | 0 | 1 | 0 | 0 | 0 |
| NM_012318 | 1 | 1 | 0 | 0 | 0 | 1 |
| NM_012319 | 1 | 0 | 1 | 0 | 0 | 0 |
| NM_012320 | 1 | 0 | 1 | 0 | 0 | 1 |
| NM_012321 | 1 | 1 | 1 | 1 | 0 | 0 |
| NM_012322 | 1 | 1 | 1 | 1 | 0 | 1 |
| NM_012323 | 1 | 0 | 1 | 0 | 0 | 0 |
| NM_012324 | 1 | 0 | 1 | 0 | 0 | 1 |
| NM_012325 | 1 | 0 | 1 | 0 | 0 | 0 |
| NM_012326 | 1 | 0 | 1 | 0 | 0 | 0 |
| NM_012327 | 1 | 0 | 1 | 1 | 0 | 0 |
| NM_012328 | 1 | 0 | 1 | 1 | 1 | 0 |
| NM_012329 | 1 | 0 | 1 | 0 | 1 | 1 |
| NM_012330 | 1 | 0 | 1 | 0 | 0 | 0 |
| NM_012331 | 1 | 1 | 1 | 1 | 0 | 1 |
| NM_012332 | 1 | 1 | 1 | 1 | 1 | 1 |
| NM_012333 | 1 | 0 | 1 | 0 | 0 | 1 |
| NM_012334 | 1 | 1 | 1 | 1 | 1 | 1 |
| NM_012335 | 0 | 0 | 1 | 1 | 0 | 0 |
| NM_012336 | 1 | 0 | 1 | 0 | 0 | 0 |
| NM_012337 | 1 | 0 | 1 | 1 | 0 | 1 |
| NM_012338 | 1 | 0 | 1 | 0 | 0 | 0 |
| NM_012339 | 1 | 0 | 1 | 0 | 1 | 1 |
| NM_012340 | 1 | 0 | 0 | 0 | 0 | 1 |
| NM_012341 | 1 | 1 | 1 | 1 | 0 | 1 |
| NM_012342 | 1 | 0 | 1 | 0 | 1 | 1 |
| NM_012343 | 1 | 0 | 1 | 0 | 0 | 1 |
| NM_012344 | 1 | 0 | 0 | 0 | 0 | 0 |
| NM_012345 | 1 | 0 | 1 | 0 | 0 | 0 |
| NM_012347 | 1 | 1 | 1 | 1 | 0 | 1 |
| NM_012351 | 0 | 1 | 0 | 0 | 0 | 0 |
| NM_012352 | 1 | 1 | 1 | 0 | 1 | 0 |

|           |   |   |   |   |   |   |
|-----------|---|---|---|---|---|---|
| NM_012360 | 0 | 0 | 0 | 0 | 0 | 1 |
| NM_012368 | 1 | 0 | 1 | 0 | 0 | 0 |
| NM_012369 | 1 | 0 | 1 | 0 | 0 | 0 |
| NM_012373 | 1 | 1 | 1 | 1 | 0 | 0 |
| NM_012377 | 1 | 0 | 1 | 0 | 0 | 1 |
| NM_012378 | 0 | 0 | 1 | 0 | 0 | 0 |
| NM_012381 | 1 | 0 | 1 | 1 | 1 | 1 |
| NM_012382 | 1 | 1 | 1 | 0 | 0 | 1 |
| NM_012383 | 1 | 1 | 1 | 1 | 0 | 1 |
| NM_012384 | 1 | 1 | 1 | 1 | 0 | 0 |
| NM_012385 | 1 | 0 | 1 | 0 | 0 | 1 |
| NM_012387 | 1 | 1 | 1 | 1 | 0 | 1 |
| NM_012388 | 1 | 0 | 1 | 1 | 0 | 0 |
| NM_012390 | 1 | 0 | 1 | 1 | 0 | 0 |
| NM_012391 | 1 | 0 | 1 | 1 | 1 | 1 |
| NM_012392 | 1 | 0 | 1 | 0 | 0 | 0 |
| NM_012393 | 1 | 1 | 1 | 1 | 0 | 1 |
| NM_012394 | 1 | 1 | 1 | 1 | 0 | 1 |
| NM_012395 | 1 | 1 | 1 | 1 | 0 | 0 |
| NM_012396 | 1 | 0 | 1 | 0 | 1 | 1 |
| NM_012398 | 1 | 0 | 1 | 0 | 0 | 1 |
| NM_012399 | 1 | 0 | 1 | 0 | 0 | 0 |
| NM_012400 | 1 | 0 | 1 | 0 | 0 | 0 |
| NM_012401 | 1 | 1 | 1 | 1 | 0 | 0 |
| NM_012402 | 1 | 0 | 0 | 0 | 0 | 0 |
| NM_012403 | 1 | 0 | 1 | 0 | 0 | 0 |
| NM_012404 | 1 | 0 | 1 | 0 | 1 | 1 |
| NM_012406 | 1 | 0 | 1 | 1 | 0 | 0 |
| NM_012407 | 1 | 1 | 1 | 1 | 0 | 1 |
| NM_012408 | 1 | 0 | 1 | 1 | 0 | 1 |
| NM_012411 | 1 | 0 | 0 | 0 | 0 | 0 |
| NM_012412 | 1 | 1 | 1 | 1 | 1 | 1 |
| NM_012413 | 1 | 1 | 1 | 1 | 1 | 1 |
| NM_012414 | 1 | 1 | 1 | 0 | 1 | 1 |
| NM_012415 | 1 | 0 | 1 | 0 | 0 | 1 |
| NM_012417 | 1 | 0 | 1 | 0 | 0 | 1 |
| NM_012418 | 1 | 0 | 1 | 0 | 0 | 0 |
| NM_012419 | 1 | 0 | 1 | 0 | 1 | 0 |
| NM_012420 | 1 | 1 | 1 | 1 | 1 | 1 |
| NM_012421 | 1 | 0 | 1 | 0 | 0 | 1 |
| NM_012423 | 1 | 0 | 1 | 1 | 1 | 1 |
| NM_012424 | 1 | 0 | 1 | 1 | 0 | 0 |
| NM_012425 | 1 | 0 | 1 | 0 | 1 | 1 |
| NM_012426 | 1 | 0 | 1 | 1 | 0 | 0 |
| NM_012427 | 0 | 0 | 1 | 0 | 0 | 1 |
| NM_012428 | 1 | 1 | 1 | 1 | 0 | 1 |
| NM_012429 | 1 | 1 | 1 | 1 | 1 | 1 |
| NM_012430 | 1 | 0 | 1 | 0 | 1 | 0 |
| NM_012431 | 1 | 0 | 1 | 0 | 0 | 0 |
| NM_012432 | 1 | 0 | 1 | 0 | 0 | 1 |
| NM_012433 | 1 | 0 | 1 | 1 | 0 | 0 |
| NM_012434 | 1 | 0 | 1 | 1 | 0 | 0 |

|           |   |   |   |   |   |   |
|-----------|---|---|---|---|---|---|
| NM_012436 | 1 | 0 | 0 | 1 | 0 | 0 |
| NM_012437 | 1 | 1 | 1 | 0 | 0 | 1 |
| NM_012444 | 1 | 1 | 1 | 1 | 0 | 0 |
| NM_012445 | 1 | 1 | 1 | 1 | 1 | 0 |
| NM_012446 | 1 | 0 | 1 | 0 | 0 | 1 |
| NM_012447 | 1 | 1 | 1 | 1 | 1 | 0 |
| NM_012448 | 1 | 1 | 1 | 1 | 1 | 1 |
| NM_012449 | 1 | 0 | 1 | 0 | 0 | 1 |
| NM_012450 | 0 | 0 | 1 | 0 | 0 | 0 |
| NM_012452 | 1 | 0 | 1 | 0 | 0 | 0 |
| NM_012453 | 1 | 0 | 1 | 0 | 0 | 1 |
| NM_012454 | 1 | 0 | 1 | 0 | 0 | 0 |
| NM_012455 | 1 | 0 | 1 | 1 | 0 | 0 |
| NM_012456 | 1 | 1 | 1 | 0 | 1 | 1 |
| NM_012457 | 1 | 1 | 1 | 1 | 0 | 0 |
| NM_012458 | 1 | 1 | 1 | 1 | 0 | 0 |
| NM_012459 | 1 | 0 | 1 | 0 | 1 | 1 |
| NM_012460 | 1 | 1 | 1 | 1 | 1 | 1 |
| NM_012461 | 1 | 0 | 1 | 0 | 0 | 0 |
| NM_012463 | 1 | 1 | 1 | 1 | 0 | 0 |
| NM_012465 | 0 | 0 | 0 | 0 | 0 | 1 |
| NM_012466 | 1 | 0 | 1 | 1 | 0 | 0 |
| NM_012467 | 0 | 0 | 1 | 0 | 0 | 0 |
| NM_012468 | 1 | 0 | 1 | 0 | 0 | 0 |
| NM_012469 | 1 | 0 | 1 | 0 | 0 | 0 |
| NM_012470 | 1 | 1 | 1 | 0 | 0 | 0 |
| NM_012471 | 1 | 0 | 0 | 0 | 0 | 0 |
| NM_012472 | 1 | 1 | 1 | 0 | 0 | 0 |
| NM_012473 | 1 | 0 | 1 | 0 | 0 | 1 |
| NM_012474 | 1 | 1 | 1 | 1 | 0 | 0 |
| NM_012477 | 1 | 0 | 1 | 1 | 1 | 1 |
| NM_012478 | 1 | 1 | 1 | 1 | 0 | 1 |
| NM_012479 | 1 | 1 | 1 | 1 | 0 | 0 |
| NM_012481 | 1 | 0 | 1 | 0 | 0 | 0 |
| NM_012482 | 1 | 1 | 1 | 1 | 0 | 1 |
| NM_012483 | 1 | 0 | 1 | 0 | 0 | 0 |
| NM_012484 | 1 | 1 | 1 | 0 | 0 | 0 |
| NM_013227 | 1 | 0 | 1 | 0 | 0 | 0 |
| NM_013229 | 1 | 0 | 1 | 1 | 0 | 1 |
| NM_013230 | 1 | 1 | 1 | 1 | 0 | 1 |
| NM_013232 | 1 | 0 | 1 | 0 | 0 | 0 |
| NM_013233 | 1 | 0 | 1 | 1 | 1 | 1 |
| NM_013234 | 1 | 1 | 1 | 1 | 0 | 1 |
| NM_013235 | 1 | 0 | 1 | 0 | 0 | 0 |
| NM_013236 | 1 | 1 | 1 | 1 | 0 | 0 |
| NM_013237 | 1 | 1 | 1 | 1 | 1 | 1 |
| NM_013238 | 1 | 0 | 1 | 0 | 0 | 0 |
| NM_013239 | 1 | 1 | 1 | 1 | 1 | 1 |
| NM_013241 | 1 | 1 | 1 | 1 | 1 | 1 |
| NM_013242 | 1 | 0 | 1 | 0 | 0 | 1 |
| NM_013243 | 0 | 0 | 1 | 0 | 0 | 0 |
| NM_013244 | 0 | 0 | 0 | 0 | 0 | 1 |



|           |   |   |   |   |   |   |
|-----------|---|---|---|---|---|---|
| NM_013245 | 1 | 0 | 1 | 0 | 0 | 0 |
| NM_013246 | 1 | 1 | 1 | 1 | 0 | 0 |
| NM_013247 | 1 | 0 | 1 | 1 | 1 | 0 |
| NM_013248 | 1 | 1 | 1 | 1 | 0 | 0 |
| NM_013250 | 1 | 0 | 1 | 0 | 0 | 0 |
| NM_013251 | 1 | 0 | 1 | 1 | 0 | 1 |
| NM_013252 | 1 | 1 | 1 | 1 | 0 | 0 |
| NM_013253 | 1 | 0 | 1 | 1 | 1 | 1 |
| NM_013254 | 1 | 1 | 1 | 1 | 1 | 1 |
| NM_013255 | 1 | 0 | 1 | 1 | 0 | 0 |
| NM_013256 | 1 | 1 | 1 | 1 | 1 | 1 |
| NM_013257 | 1 | 1 | 1 | 1 | 0 | 0 |
| NM_013258 | 1 | 1 | 1 | 1 | 1 | 1 |
| NM_013259 | 1 | 0 | 0 | 0 | 0 | 1 |
| NM_013260 | 1 | 0 | 1 | 1 | 0 | 0 |
| NM_013261 | 1 | 1 | 1 | 1 | 0 | 0 |
| NM_013262 | 1 | 1 | 1 | 1 | 1 | 1 |
| NM_013263 | 1 | 0 | 1 | 1 | 0 | 1 |
| NM_013264 | 1 | 0 | 1 | 0 | 0 | 0 |
| NM_013265 | 1 | 1 | 1 | 1 | 1 | 1 |
| NM_013266 | 1 | 1 | 1 | 0 | 0 | 0 |
| NM_013267 | 1 | 0 | 1 | 1 | 1 | 0 |
| NM_013269 | 1 | 0 | 1 | 0 | 1 | 0 |
| NM_013270 | 1 | 0 | 1 | 0 | 0 | 1 |
| NM_013271 | 1 | 0 | 1 | 1 | 0 | 0 |
| NM_013272 | 1 | 0 | 1 | 1 | 1 | 1 |
| NM_013274 | 1 | 0 | 1 | 1 | 0 | 0 |
| NM_013275 | 1 | 0 | 1 | 0 | 0 | 1 |
| NM_013276 | 1 | 0 | 1 | 1 | 0 | 0 |
| NM_013277 | 1 | 0 | 1 | 0 | 1 | 1 |
| NM_013278 | 1 | 0 | 1 | 0 | 0 | 0 |
| NM_013279 | 1 | 1 | 1 | 1 | 0 | 1 |
| NM_013280 | 0 | 0 | 0 | 0 | 0 | 1 |
| NM_013282 | 1 | 0 | 1 | 0 | 1 | 1 |
| NM_013283 | 1 | 1 | 1 | 0 | 0 | 0 |
| NM_013284 | 1 | 0 | 1 | 0 | 0 | 0 |
| NM_013285 | 1 | 1 | 1 | 1 | 0 | 0 |
| NM_013286 | 1 | 1 | 1 | 1 | 0 | 0 |
| NM_013287 | 1 | 1 | 1 | 1 | 0 | 0 |
| NM_013289 | 1 | 1 | 1 | 1 | 0 | 0 |
| NM_013290 | 1 | 1 | 1 | 1 | 0 | 1 |
| NM_013291 | 1 | 0 | 1 | 1 | 1 | 1 |
| NM_013292 | 1 | 0 | 1 | 0 | 0 | 0 |
| NM_013293 | 1 | 1 | 1 | 1 | 0 | 0 |
| NM_013296 | 1 | 1 | 1 | 1 | 1 | 1 |
| NM_013299 | 1 | 1 | 1 | 1 | 1 | 1 |
| NM_013300 | 1 | 1 | 1 | 1 | 1 | 1 |
| NM_013301 | 1 | 1 | 1 | 1 | 0 | 0 |
| NM_013302 | 1 | 0 | 1 | 1 | 0 | 0 |
| NM_013304 | 1 | 0 | 1 | 1 | 0 | 0 |
| NM_013305 | 1 | 0 | 0 | 0 | 0 | 1 |
| NM_013306 | 1 | 0 | 1 | 0 | 1 | 0 |

|           |   |   |   |   |   |   |
|-----------|---|---|---|---|---|---|
| NM_013307 | 0 | 0 | 1 | 1 | 0 | 0 |
| NM_013308 | 1 | 0 | 1 | 1 | 0 | 0 |
| NM_013310 | 1 | 1 | 1 | 1 | 0 | 1 |
| NM_013312 | 1 | 1 | 1 | 1 | 0 | 1 |
| NM_013313 | 1 | 1 | 1 | 1 | 1 | 1 |
| NM_013314 | 1 | 0 | 1 | 1 | 1 | 0 |
| NM_013315 | 1 | 1 | 0 | 0 | 0 | 0 |
| NM_013316 | 1 | 0 | 1 | 0 | 1 | 0 |
| NM_013319 | 1 | 1 | 1 | 1 | 0 | 1 |
| NM_013320 | 1 | 1 | 1 | 1 | 0 | 1 |
| NM_013321 | 1 | 1 | 0 | 0 | 0 | 1 |
| NM_013322 | 1 | 0 | 1 | 1 | 1 | 1 |
| NM_013323 | 1 | 0 | 1 | 1 | 0 | 0 |
| NM_013324 | 1 | 1 | 1 | 1 | 0 | 0 |
| NM_013325 | 1 | 0 | 1 | 0 | 1 | 1 |
| NM_013326 | 1 | 0 | 1 | 0 | 0 | 1 |
| NM_013327 | 1 | 0 | 1 | 0 | 0 | 0 |
| NM_013328 | 1 | 1 | 1 | 1 | 0 | 0 |
| NM_013329 | 1 | 1 | 1 | 1 | 1 | 0 |
| NM_013330 | 1 | 1 | 1 | 1 | 0 | 1 |
| NM_013332 | 1 | 1 | 1 | 1 | 0 | 0 |
| NM_013333 | 1 | 0 | 1 | 0 | 0 | 0 |
| NM_013334 | 1 | 1 | 1 | 1 | 0 | 1 |
| NM_013335 | 1 | 0 | 1 | 0 | 0 | 0 |
| NM_013336 | 1 | 1 | 1 | 1 | 0 | 1 |
| NM_013337 | 1 | 0 | 1 | 1 | 1 | 1 |
| NM_013338 | 1 | 0 | 1 | 1 | 0 | 0 |
| NM_013339 | 1 | 0 | 1 | 0 | 1 | 1 |
| NM_013341 | 1 | 0 | 1 | 1 | 0 | 0 |
| NM_013342 | 1 | 0 | 1 | 0 | 0 | 0 |
| NM_013343 | 1 | 0 | 1 | 1 | 0 | 0 |
| NM_013345 | 1 | 0 | 1 | 1 | 0 | 0 |
| NM_013346 | 1 | 1 | 1 | 1 | 1 | 0 |
| NM_013347 | 1 | 0 | 1 | 1 | 0 | 1 |
| NM_013348 | 1 | 0 | 1 | 0 | 0 | 1 |
| NM_013349 | 1 | 0 | 1 | 0 | 0 | 0 |
| NM_013351 | 1 | 1 | 1 | 1 | 0 | 0 |
| NM_013352 | 1 | 1 | 1 | 1 | 1 | 0 |
| NM_013353 | 1 | 0 | 1 | 0 | 0 | 0 |
| NM_013354 | 1 | 0 | 1 | 0 | 0 | 0 |
| NM_013355 | 1 | 0 | 1 | 0 | 0 | 1 |
| NM_013356 | 1 | 0 | 1 | 1 | 0 | 0 |
| NM_013357 | 1 | 0 | 0 | 0 | 0 | 0 |
| NM_013359 | 0 | 0 | 0 | 0 | 0 | 1 |
| NM_013360 | 1 | 0 | 1 | 1 | 0 | 0 |
| NM_013361 | 1 | 0 | 1 | 1 | 0 | 0 |
| NM_013362 | 1 | 0 | 1 | 1 | 0 | 0 |
| NM_013363 | 1 | 0 | 1 | 0 | 0 | 1 |
| NM_013364 | 1 | 1 | 1 | 1 | 0 | 0 |
| NM_013365 | 1 | 0 | 1 | 1 | 1 | 1 |
| NM_013366 | 1 | 0 | 1 | 0 | 0 | 0 |
| NM_013367 | 1 | 0 | 1 | 0 | 0 | 0 |

|           |   |   |   |   |   |   |
|-----------|---|---|---|---|---|---|
| NM_013368 | 1 | 0 | 1 | 0 | 0 | 0 |
| NM_013370 | 1 | 0 | 1 | 0 | 0 | 0 |
| NM_013372 | 0 | 0 | 0 | 0 | 0 | 1 |
| NM_013373 | 1 | 1 | 1 | 1 | 0 | 0 |
| NM_013374 | 1 | 1 | 1 | 1 | 1 | 1 |
| NM_013375 | 1 | 1 | 1 | 1 | 0 | 1 |
| NM_013376 | 1 | 0 | 1 | 1 | 1 | 1 |
| NM_013378 | 1 | 1 | 1 | 1 | 1 | 1 |
| NM_013379 | 1 | 1 | 1 | 1 | 0 | 0 |
| NM_013380 | 1 | 0 | 1 | 0 | 0 | 1 |
| NM_013381 | 1 | 0 | 1 | 0 | 0 | 0 |
| NM_013382 | 1 | 0 | 1 | 0 | 0 | 0 |
| NM_013384 | 1 | 1 | 1 | 0 | 1 | 1 |
| NM_013385 | 1 | 0 | 1 | 0 | 1 | 1 |
| NM_013386 | 1 | 1 | 1 | 0 | 0 | 0 |
| NM_013387 | 1 | 1 | 1 | 0 | 1 | 1 |
| NM_013388 | 1 | 1 | 1 | 1 | 0 | 1 |
| NM_013389 | 1 | 0 | 1 | 0 | 0 | 0 |
| NM_013390 | 1 | 1 | 1 | 1 | 0 | 0 |
| NM_013391 | 0 | 0 | 0 | 0 | 0 | 1 |
| NM_013392 | 1 | 0 | 1 | 0 | 0 | 1 |
| NM_013396 | 1 | 0 | 1 | 0 | 1 | 1 |
| NM_013397 | 1 | 1 | 1 | 1 | 0 | 0 |
| NM_013398 | 1 | 0 | 1 | 0 | 0 | 1 |
| NM_013399 | 1 | 0 | 1 | 1 | 1 | 1 |
| NM_013400 | 1 | 0 | 1 | 0 | 0 | 0 |
| NM_013401 | 1 | 0 | 1 | 1 | 0 | 0 |
| NM_013402 | 1 | 1 | 1 | 1 | 0 | 0 |
| NM_013403 | 1 | 0 | 1 | 1 | 0 | 0 |
| NM_013404 | 1 | 0 | 0 | 0 | 0 | 1 |
| NM_013409 | 1 | 1 | 1 | 0 | 0 | 1 |
| NM_013410 | 1 | 1 | 1 | 1 | 1 | 1 |
| NM_013411 | 1 | 0 | 1 | 1 | 0 | 1 |
| NM_013412 | 1 | 0 | 1 | 1 | 1 | 1 |
| NM_013416 | 1 | 1 | 1 | 1 | 0 | 0 |
| NM_013417 | 1 | 1 | 1 | 1 | 1 | 1 |
| NM_013421 | 1 | 0 | 1 | 1 | 0 | 0 |
| NM_013422 | 1 | 0 | 1 | 0 | 0 | 1 |
| NM_013423 | 1 | 1 | 1 | 0 | 0 | 1 |
| NM_013431 | 1 | 1 | 1 | 1 | 1 | 1 |
| NM_013432 | 1 | 0 | 1 | 0 | 0 | 0 |
| NM_013435 | 0 | 0 | 0 | 0 | 0 | 1 |
| NM_013436 | 1 | 0 | 1 | 0 | 1 | 1 |
| NM_013437 | 1 | 0 | 1 | 0 | 0 | 1 |
| NM_013438 | 1 | 0 | 1 | 0 | 0 | 1 |
| NM_013439 | 1 | 1 | 1 | 1 | 1 | 1 |
| NM_013441 | 1 | 1 | 1 | 1 | 0 | 1 |
| NM_013442 | 1 | 1 | 1 | 1 | 0 | 0 |
| NM_013443 | 1 | 0 | 1 | 1 | 0 | 0 |
| NM_013444 | 1 | 0 | 1 | 0 | 0 | 0 |
| NM_013445 | 1 | 0 | 1 | 0 | 0 | 0 |
| NM_013446 | 1 | 1 | 1 | 1 | 0 | 1 |

|           |   |   |   |   |   |   |
|-----------|---|---|---|---|---|---|
| NM_013448 | 1 | 1 | 1 | 1 | 1 | 1 |
| NM_013449 | 1 | 0 | 1 | 0 | 0 | 1 |
| NM_013450 | 1 | 1 | 1 | 1 | 0 | 0 |
| NM_013451 | 1 | 1 | 1 | 1 | 1 | 1 |
| NM_013452 | 1 | 0 | 1 | 0 | 0 | 0 |
| NM_013936 | 0 | 0 | 1 | 0 | 1 | 1 |
| NM_013937 | 1 | 0 | 0 | 0 | 0 | 0 |
| NM_013938 | 1 | 1 | 1 | 0 | 0 | 0 |
| NM_013939 | 1 | 0 | 1 | 0 | 0 | 0 |
| NM_013940 | 1 | 1 | 1 | 1 | 0 | 0 |
| NM_013942 | 1 | 1 | 1 | 0 | 1 | 1 |
| NM_013943 | 1 | 1 | 1 | 1 | 0 | 0 |
| NM_013945 | 1 | 0 | 1 | 1 | 0 | 0 |
| NM_013952 | 1 | 0 | 1 | 0 | 0 | 0 |
| NM_013956 | 1 | 0 | 1 | 0 | 0 | 1 |
| NM_013958 | 1 | 1 | 1 | 0 | 0 | 1 |
| NM_013959 | 1 | 1 | 1 | 0 | 0 | 1 |
| NM_013960 | 1 | 0 | 1 | 1 | 0 | 0 |
| NM_013961 | 1 | 0 | 1 | 0 | 0 | 1 |
| NM_013962 | 1 | 0 | 1 | 0 | 0 | 1 |
| NM_013974 | 1 | 0 | 1 | 0 | 1 | 1 |
| NM_013975 | 1 | 1 | 1 | 1 | 0 | 1 |
| NM_013976 | 1 | 1 | 1 | 0 | 0 | 1 |
| NM_013978 | 1 | 0 | 1 | 0 | 0 | 0 |
| NM_013979 | 1 | 0 | 1 | 0 | 0 | 0 |
| NM_013981 | 1 | 0 | 1 | 0 | 1 | 1 |
| NM_013982 | 1 | 0 | 1 | 1 | 1 | 1 |
| NM_013984 | 1 | 0 | 1 | 1 | 0 | 0 |
| NM_013985 | 1 | 1 | 0 | 0 | 0 | 0 |
| NM_013986 | 1 | 0 | 1 | 1 | 0 | 0 |
| NM_013987 | 1 | 1 | 1 | 1 | 0 | 0 |
| NM_013994 | 1 | 1 | 1 | 1 | 0 | 1 |
| NM_013995 | 1 | 0 | 1 | 1 | 1 | 1 |
| NM_013997 | 1 | 0 | 0 | 0 | 0 | 0 |
| NM_013999 | 1 | 0 | 1 | 0 | 1 | 1 |
| NM_014000 | 1 | 0 | 1 | 0 | 0 | 1 |
| NM_014002 | 1 | 1 | 1 | 1 | 1 | 1 |
| NM_014003 | 1 | 0 | 1 | 1 | 1 | 1 |
| NM_014004 | 1 | 0 | 1 | 1 | 0 | 0 |
| NM_014005 | 1 | 0 | 0 | 0 | 0 | 1 |
| NM_014006 | 1 | 0 | 1 | 0 | 0 | 0 |
| NM_014007 | 1 | 0 | 1 | 0 | 0 | 1 |
| NM_014008 | 1 | 1 | 1 | 1 | 0 | 0 |
| NM_014009 | 1 | 0 | 1 | 0 | 0 | 0 |
| NM_014010 | 1 | 0 | 1 | 0 | 0 | 0 |
| NM_014011 | 1 | 1 | 1 | 1 | 0 | 0 |
| NM_014012 | 1 | 0 | 1 | 0 | 0 | 1 |
| NM_014014 | 1 | 0 | 1 | 1 | 1 | 1 |
| NM_014015 | 1 | 1 | 1 | 1 | 0 | 1 |
| NM_014016 | 1 | 0 | 1 | 0 | 0 | 0 |
| NM_014017 | 1 | 1 | 1 | 0 | 1 | 0 |
| NM_014018 | 1 | 1 | 1 | 1 | 0 | 1 |

|           |   |   |   |   |   |   |
|-----------|---|---|---|---|---|---|
| NM_014019 | 1 | 1 | 1 | 1 | 0 | 1 |
| NM_014020 | 1 | 0 | 1 | 1 | 0 | 1 |
| NM_014023 | 1 | 0 | 1 | 0 | 0 | 0 |
| NM_014026 | 1 | 0 | 1 | 1 | 1 | 1 |
| NM_014027 | 1 | 1 | 1 | 1 | 0 | 1 |
| NM_014028 | 1 | 1 | 1 | 1 | 0 | 0 |
| NM_014029 | 1 | 0 | 1 | 1 | 1 | 1 |
| NM_014030 | 1 | 1 | 1 | 1 | 1 | 0 |
| NM_014031 | 0 | 0 | 0 | 0 | 0 | 1 |
| NM_014033 | 1 | 1 | 1 | 1 | 0 | 0 |
| NM_014034 | 1 | 1 | 1 | 1 | 1 | 1 |
| NM_014035 | 1 | 0 | 1 | 0 | 0 | 0 |
| NM_014037 | 1 | 1 | 1 | 1 | 0 | 0 |
| NM_014038 | 1 | 1 | 1 | 1 | 0 | 0 |
| NM_014039 | 1 | 1 | 1 | 1 | 1 | 1 |
| NM_014040 | 1 | 1 | 1 | 1 | 0 | 0 |
| NM_014041 | 1 | 0 | 1 | 1 | 0 | 1 |
| NM_014042 | 1 | 1 | 1 | 1 | 0 | 0 |
| NM_014043 | 1 | 0 | 1 | 0 | 0 | 1 |
| NM_014044 | 1 | 0 | 1 | 1 | 1 | 0 |
| NM_014045 | 1 | 1 | 1 | 1 | 0 | 0 |
| NM_014046 | 1 | 1 | 1 | 1 | 0 | 1 |
| NM_014047 | 1 | 1 | 1 | 1 | 0 | 1 |
| NM_014048 | 1 | 1 | 1 | 1 | 1 | 1 |
| NM_014049 | 1 | 0 | 1 | 1 | 1 | 1 |
| NM_014050 | 1 | 0 | 1 | 0 | 1 | 1 |
| NM_014051 | 1 | 0 | 1 | 1 | 0 | 1 |
| NM_014053 | 1 | 1 | 1 | 1 | 0 | 1 |
| NM_014054 | 1 | 0 | 1 | 0 | 0 | 0 |
| NM_014055 | 1 | 0 | 1 | 0 | 0 | 1 |
| NM_014056 | 1 | 0 | 1 | 0 | 0 | 1 |
| NM_014057 | 0 | 0 | 1 | 0 | 0 | 0 |
| NM_014058 | 1 | 0 | 1 | 0 | 0 | 0 |
| NM_014059 | 1 | 1 | 1 | 1 | 1 | 1 |
| NM_014060 | 1 | 0 | 1 | 1 | 0 | 1 |
| NM_014061 | 1 | 0 | 1 | 1 | 1 | 1 |
| NM_014062 | 1 | 1 | 1 | 1 | 1 | 1 |
| NM_014063 | 1 | 1 | 1 | 1 | 0 | 0 |
| NM_014064 | 1 | 0 | 1 | 0 | 0 | 0 |
| NM_014065 | 1 | 0 | 0 | 0 | 0 | 0 |
| NM_014066 | 1 | 0 | 1 | 0 | 0 | 0 |
| NM_014067 | 1 | 0 | 1 | 0 | 0 | 0 |
| NM_014068 | 0 | 0 | 1 | 0 | 0 | 0 |
| NM_014069 | 1 | 0 | 1 | 0 | 0 | 1 |
| NM_014070 | 1 | 0 | 0 | 0 | 0 | 1 |
| NM_014071 | 1 | 1 | 1 | 1 | 0 | 0 |
| NM_014077 | 1 | 0 | 1 | 0 | 0 | 1 |
| NM_014078 | 1 | 0 | 1 | 1 | 0 | 0 |
| NM_014079 | 0 | 0 | 1 | 0 | 0 | 0 |
| NM_014080 | 1 | 0 | 1 | 0 | 0 | 0 |
| NM_014081 | 1 | 0 | 1 | 0 | 0 | 1 |
| NM_014084 | 1 | 1 | 1 | 1 | 0 | 1 |

|           |   |   |   |   |   |   |
|-----------|---|---|---|---|---|---|
| NM_014086 | 1 | 0 | 1 | 0 | 0 | 0 |
| NM_014089 | 1 | 0 | 1 | 0 | 0 | 0 |
| NM_014092 | 0 | 0 | 1 | 0 | 0 | 0 |
| NM_014095 | 0 | 0 | 1 | 0 | 0 | 1 |
| NM_014096 | 1 | 1 | 1 | 1 | 1 | 1 |
| NM_014098 | 1 | 1 | 1 | 1 | 1 | 1 |
| NM_014099 | 0 | 0 | 0 | 0 | 0 | 1 |
| NM_014100 | 1 | 1 | 1 | 1 | 0 | 0 |
| NM_014104 | 1 | 0 | 1 | 1 | 0 | 1 |
| NM_014106 | 1 | 0 | 1 | 1 | 0 | 0 |
| NM_014109 | 1 | 0 | 1 | 0 | 0 | 1 |
| NM_014110 | 1 | 0 | 1 | 0 | 0 | 0 |
| NM_014111 | 0 | 0 | 0 | 0 | 0 | 1 |
| NM_014112 | 1 | 1 | 1 | 1 | 0 | 1 |
| NM_014113 | 1 | 0 | 1 | 1 | 1 | 1 |
| NM_014117 | 1 | 0 | 1 | 0 | 1 | 0 |
| NM_014118 | 1 | 1 | 1 | 1 | 0 | 0 |
| NM_014121 | 1 | 0 | 1 | 0 | 0 | 0 |
| NM_014123 | 1 | 0 | 1 | 0 | 0 | 0 |
| NM_014124 | 1 | 0 | 1 | 1 | 0 | 0 |
| NM_014125 | 0 | 0 | 1 | 0 | 0 | 0 |
| NM_014126 | 1 | 1 | 1 | 1 | 0 | 0 |
| NM_014127 | 1 | 1 | 1 | 1 | 0 | 0 |
| NM_014129 | 0 | 0 | 0 | 1 | 0 | 0 |
| NM_014133 | 1 | 0 | 1 | 0 | 0 | 1 |
| NM_014134 | 1 | 1 | 1 | 1 | 0 | 0 |
| NM_014135 | 1 | 1 | 1 | 1 | 1 | 1 |
| NM_014137 | 1 | 1 | 1 | 1 | 0 | 0 |
| NM_014138 | 1 | 0 | 1 | 0 | 0 | 1 |
| NM_014139 | 1 | 0 | 0 | 0 | 0 | 0 |
| NM_014140 | 1 | 0 | 1 | 1 | 0 | 1 |
| NM_014141 | 1 | 1 | 1 | 1 | 1 | 1 |
| NM_014142 | 1 | 0 | 1 | 1 | 0 | 0 |
| NM_014143 | 1 | 0 | 1 | 0 | 1 | 1 |
| NM_014145 | 1 | 1 | 1 | 1 | 0 | 0 |
| NM_014146 | 1 | 0 | 1 | 1 | 1 | 1 |
| NM_014147 | 1 | 1 | 1 | 1 | 0 | 0 |
| NM_014148 | 1 | 0 | 0 | 0 | 0 | 1 |
| NM_014149 | 1 | 0 | 1 | 0 | 1 | 1 |
| NM_014151 | 1 | 0 | 1 | 0 | 0 | 1 |
| NM_014152 | 1 | 0 | 1 | 1 | 1 | 1 |
| NM_014153 | 1 | 0 | 1 | 0 | 1 | 0 |
| NM_014154 | 1 | 0 | 1 | 1 | 0 | 0 |
| NM_014155 | 1 | 0 | 1 | 0 | 0 | 0 |
| NM_014157 | 1 | 1 | 1 | 0 | 1 | 1 |
| NM_014160 | 1 | 0 | 1 | 0 | 1 | 1 |
| NM_014161 | 1 | 1 | 1 | 1 | 0 | 1 |
| NM_014162 | 1 | 0 | 1 | 0 | 1 | 1 |
| NM_014164 | 1 | 1 | 1 | 1 | 0 | 0 |
| NM_014165 | 1 | 1 | 1 | 1 | 0 | 0 |
| NM_014166 | 1 | 0 | 1 | 0 | 0 | 0 |
| NM_014167 | 1 | 0 | 1 | 0 | 0 | 0 |

|           |   |   |   |   |   |   |
|-----------|---|---|---|---|---|---|
| NM_014168 | 1 | 0 | 1 | 1 | 0 | 0 |
| NM_014169 | 1 | 0 | 1 | 1 | 0 | 1 |
| NM_014170 | 1 | 0 | 1 | 0 | 1 | 1 |
| NM_014171 | 1 | 1 | 1 | 1 | 0 | 0 |
| NM_014172 | 1 | 1 | 1 | 1 | 1 | 1 |
| NM_014173 | 1 | 1 | 1 | 1 | 0 | 0 |
| NM_014174 | 1 | 1 | 1 | 1 | 0 | 0 |
| NM_014175 | 1 | 1 | 1 | 1 | 0 | 1 |
| NM_014176 | 1 | 1 | 1 | 0 | 1 | 1 |
| NM_014177 | 1 | 1 | 1 | 1 | 1 | 1 |
| NM_014178 | 1 | 0 | 1 | 0 | 0 | 0 |
| NM_014179 | 1 | 0 | 1 | 0 | 1 | 1 |
| NM_014180 | 1 | 1 | 1 | 1 | 0 | 1 |
| NM_014181 | 1 | 1 | 1 | 1 | 1 | 1 |
| NM_014182 | 1 | 0 | 1 | 0 | 0 | 0 |
| NM_014183 | 1 | 0 | 1 | 0 | 1 | 1 |
| NM_014184 | 1 | 0 | 1 | 0 | 1 | 1 |
| NM_014185 | 1 | 1 | 1 | 1 | 0 | 1 |
| NM_014186 | 1 | 1 | 1 | 1 | 0 | 0 |
| NM_014187 | 1 | 0 | 1 | 0 | 0 | 1 |
| NM_014188 | 1 | 0 | 1 | 0 | 1 | 0 |
| NM_014190 | 1 | 0 | 1 | 0 | 0 | 0 |
| NM_014191 | 1 | 1 | 0 | 0 | 0 | 1 |
| NM_014205 | 1 | 0 | 1 | 1 | 0 | 0 |
| NM_014206 | 1 | 1 | 1 | 1 | 0 | 0 |
| NM_014207 | 1 | 0 | 1 | 1 | 0 | 1 |
| NM_014210 | 1 | 1 | 1 | 1 | 1 | 1 |
| NM_014211 | 1 | 0 | 0 | 0 | 0 | 1 |
| NM_014212 | 0 | 0 | 0 | 0 | 0 | 1 |
| NM_014213 | 1 | 0 | 1 | 0 | 0 | 0 |
| NM_014214 | 1 | 1 | 1 | 1 | 0 | 1 |
| NM_014215 | 1 | 0 | 1 | 0 | 0 | 0 |
| NM_014216 | 1 | 1 | 1 | 1 | 1 | 1 |
| NM_014218 | 1 | 1 | 1 | 1 | 0 | 0 |
| NM_014219 | 1 | 1 | 1 | 1 | 0 | 0 |
| NM_014220 | 1 | 0 | 1 | 0 | 0 | 1 |
| NM_014221 | 1 | 1 | 1 | 1 | 1 | 1 |
| NM_014222 | 1 | 1 | 1 | 1 | 0 | 1 |
| NM_014223 | 1 | 1 | 1 | 1 | 0 | 1 |
| NM_014224 | 1 | 0 | 1 | 0 | 0 | 0 |
| NM_014225 | 1 | 0 | 1 | 0 | 0 | 0 |
| NM_014226 | 1 | 1 | 1 | 0 | 0 | 0 |
| NM_014228 | 1 | 0 | 1 | 0 | 0 | 0 |
| NM_014229 | 1 | 0 | 1 | 0 | 0 | 0 |
| NM_014230 | 1 | 1 | 1 | 1 | 0 | 0 |
| NM_014231 | 1 | 1 | 1 | 1 | 0 | 0 |
| NM_014232 | 1 | 1 | 1 | 1 | 1 | 1 |
| NM_014233 | 1 | 0 | 1 | 0 | 0 | 0 |
| NM_014234 | 1 | 1 | 1 | 1 | 1 | 1 |
| NM_014235 | 1 | 1 | 1 | 1 | 0 | 1 |
| NM_014236 | 1 | 1 | 1 | 1 | 0 | 1 |
| NM_014239 | 1 | 0 | 1 | 0 | 0 | 1 |

|           |   |   |   |   |   |   |
|-----------|---|---|---|---|---|---|
| NM_014240 | 1 | 0 | 1 | 0 | 0 | 0 |
| NM_014241 | 1 | 0 | 1 | 1 | 1 | 1 |
| NM_014242 | 1 | 1 | 1 | 0 | 0 | 1 |
| NM_014243 | 0 | 1 | 0 | 0 | 0 | 0 |
| NM_014245 | 1 | 1 | 1 | 1 | 0 | 1 |
| NM_014246 | 1 | 0 | 1 | 1 | 1 | 1 |
| NM_014247 | 1 | 1 | 1 | 1 | 0 | 1 |
| NM_014248 | 1 | 0 | 1 | 1 | 0 | 0 |
| NM_014251 | 1 | 1 | 1 | 1 | 0 | 1 |
| NM_014252 | 1 | 1 | 1 | 1 | 1 | 1 |
| NM_014253 | 1 | 0 | 1 | 1 | 0 | 0 |
| NM_014254 | 1 | 1 | 1 | 1 | 0 | 0 |
| NM_014255 | 1 | 1 | 1 | 1 | 0 | 1 |
| NM_014256 | 1 | 0 | 1 | 1 | 0 | 0 |
| NM_014257 | 1 | 0 | 0 | 0 | 0 | 0 |
| NM_014258 | 1 | 0 | 1 | 0 | 0 | 1 |
| NM_014260 | 1 | 1 | 1 | 1 | 0 | 0 |
| NM_014261 | 1 | 1 | 0 | 0 | 0 | 0 |
| NM_014262 | 1 | 0 | 1 | 0 | 0 | 0 |
| NM_014263 | 1 | 0 | 1 | 0 | 0 | 0 |
| NM_014264 | 1 | 1 | 1 | 0 | 0 | 1 |
| NM_014265 | 1 | 0 | 1 | 0 | 1 | 0 |
| NM_014266 | 1 | 1 | 1 | 1 | 0 | 1 |
| NM_014267 | 1 | 0 | 1 | 1 | 0 | 0 |
| NM_014268 | 1 | 1 | 1 | 1 | 1 | 1 |
| NM_014269 | 1 | 0 | 1 | 1 | 0 | 0 |
| NM_014270 | 0 | 0 | 0 | 0 | 0 | 1 |
| NM_014271 | 0 | 0 | 0 | 0 | 0 | 1 |
| NM_014274 | 1 | 0 | 0 | 0 | 0 | 1 |
| NM_014275 | 1 | 1 | 1 | 1 | 0 | 1 |
| NM_014276 | 1 | 0 | 1 | 0 | 0 | 0 |
| NM_014278 | 1 | 0 | 1 | 0 | 0 | 0 |
| NM_014279 | 1 | 1 | 1 | 1 | 0 | 0 |
| NM_014280 | 1 | 0 | 1 | 0 | 0 | 0 |
| NM_014281 | 1 | 1 | 1 | 1 | 0 | 0 |
| NM_014282 | 1 | 1 | 1 | 1 | 1 | 1 |
| NM_014283 | 1 | 1 | 1 | 1 | 1 | 1 |
| NM_014284 | 1 | 1 | 1 | 1 | 0 | 0 |
| NM_014285 | 1 | 1 | 1 | 1 | 0 | 0 |
| NM_014286 | 1 | 0 | 1 | 0 | 0 | 0 |
| NM_014287 | 1 | 0 | 1 | 0 | 0 | 1 |
| NM_014288 | 1 | 0 | 1 | 1 | 0 | 0 |
| NM_014289 | 1 | 1 | 1 | 1 | 0 | 1 |
| NM_014290 | 1 | 0 | 1 | 0 | 0 | 0 |
| NM_014291 | 0 | 0 | 1 | 0 | 0 | 0 |
| NM_014292 | 1 | 1 | 1 | 0 | 0 | 1 |
| NM_014293 | 1 | 1 | 1 | 1 | 0 | 0 |
| NM_014294 | 1 | 0 | 1 | 1 | 0 | 0 |
| NM_014296 | 1 | 0 | 1 | 1 | 0 | 0 |
| NM_014297 | 1 | 1 | 1 | 1 | 0 | 0 |
| NM_014298 | 1 | 0 | 1 | 1 | 0 | 0 |
| NM_014299 | 1 | 1 | 1 | 1 | 0 | 0 |



|           |   |   |   |   |   |   |
|-----------|---|---|---|---|---|---|
| NM_014300 | 1 | 1 | 1 | 0 | 1 | 1 |
| NM_014301 | 1 | 0 | 1 | 1 | 0 | 0 |
| NM_014302 | 1 | 0 | 1 | 1 | 0 | 1 |
| NM_014303 | 1 | 1 | 1 | 1 | 0 | 0 |
| NM_014305 | 1 | 0 | 1 | 1 | 0 | 0 |
| NM_014306 | 1 | 0 | 1 | 1 | 0 | 1 |
| NM_014308 | 1 | 0 | 1 | 0 | 0 | 0 |
| NM_014310 | 1 | 0 | 0 | 0 | 0 | 0 |
| NM_014311 | 1 | 0 | 1 | 1 | 0 | 0 |
| NM_014312 | 0 | 0 | 0 | 0 | 0 | 1 |
| NM_014313 | 1 | 1 | 1 | 1 | 0 | 1 |
| NM_014314 | 1 | 1 | 1 | 0 | 0 | 0 |
| NM_014315 | 1 | 0 | 1 | 0 | 1 | 1 |
| NM_014316 | 1 | 0 | 1 | 1 | 0 | 0 |
| NM_014317 | 1 | 1 | 1 | 1 | 1 | 1 |
| NM_014318 | 1 | 0 | 1 | 1 | 0 | 0 |
| NM_014319 | 1 | 0 | 1 | 0 | 0 | 0 |
| NM_014320 | 1 | 1 | 1 | 1 | 1 | 1 |
| NM_014321 | 1 | 1 | 1 | 0 | 0 | 1 |
| NM_014322 | 1 | 1 | 1 | 1 | 0 | 0 |
| NM_014324 | 1 | 1 | 1 | 1 | 0 | 0 |
| NM_014325 | 1 | 1 | 1 | 1 | 1 | 1 |
| NM_014326 | 1 | 1 | 1 | 1 | 0 | 0 |
| NM_014328 | 1 | 0 | 1 | 0 | 0 | 0 |
| NM_014329 | 1 | 1 | 1 | 1 | 0 | 0 |
| NM_014330 | 1 | 1 | 1 | 1 | 1 | 1 |
| NM_014331 | 1 | 0 | 1 | 0 | 0 | 0 |
| NM_014332 | 1 | 0 | 0 | 0 | 0 | 1 |
| NM_014333 | 1 | 1 | 1 | 0 | 0 | 1 |
| NM_014335 | 1 | 0 | 1 | 1 | 0 | 1 |
| NM_014337 | 1 | 0 | 1 | 0 | 0 | 0 |
| NM_014338 | 1 | 1 | 1 | 1 | 0 | 1 |
| NM_014339 | 1 | 0 | 1 | 1 | 0 | 0 |
| NM_014341 | 1 | 1 | 1 | 1 | 1 | 1 |
| NM_014342 | 1 | 1 | 1 | 1 | 0 | 1 |
| NM_014343 | 1 | 0 | 1 | 0 | 0 | 1 |
| NM_014344 | 1 | 0 | 1 | 0 | 0 | 1 |
| NM_014345 | 1 | 1 | 1 | 1 | 0 | 0 |
| NM_014346 | 1 | 0 | 1 | 1 | 0 | 0 |
| NM_014347 | 1 | 0 | 1 | 0 | 0 | 1 |
| NM_014348 | 1 | 0 | 1 | 0 | 0 | 1 |
| NM_014349 | 1 | 0 | 1 | 0 | 0 | 1 |
| NM_014350 | 1 | 0 | 1 | 1 | 0 | 0 |
| NM_014354 | 1 | 0 | 1 | 0 | 0 | 0 |
| NM_014356 | 1 | 0 | 1 | 1 | 0 | 0 |
| NM_014357 | 1 | 1 | 1 | 1 | 0 | 0 |
| NM_014358 | 1 | 1 | 1 | 1 | 0 | 1 |
| NM_014359 | 1 | 0 | 1 | 1 | 0 | 0 |
| NM_014360 | 1 | 1 | 1 | 0 | 0 | 0 |
| NM_014361 | 1 | 0 | 0 | 0 | 0 | 1 |
| NM_014362 | 1 | 0 | 1 | 0 | 0 | 0 |
| NM_014363 | 1 | 0 | 1 | 0 | 0 | 1 |

|           |   |   |   |   |   |   |
|-----------|---|---|---|---|---|---|
| NM_014364 | 1 | 1 | 1 | 1 | 1 | 1 |
| NM_014366 | 1 | 1 | 1 | 1 | 0 | 1 |
| NM_014367 | 1 | 0 | 1 | 0 | 0 | 0 |
| NM_014368 | 1 | 1 | 1 | 1 | 1 | 1 |
| NM_014369 | 1 | 1 | 1 | 1 | 0 | 0 |
| NM_014370 | 1 | 0 | 0 | 0 | 0 | 0 |
| NM_014371 | 1 | 0 | 1 | 0 | 0 | 1 |
| NM_014372 | 1 | 1 | 1 | 1 | 0 | 1 |
| NM_014373 | 1 | 1 | 1 | 1 | 0 | 1 |
| NM_014374 | 1 | 0 | 1 | 0 | 0 | 0 |
| NM_014375 | 0 | 0 | 0 | 0 | 0 | 1 |
| NM_014376 | 1 | 1 | 1 | 1 | 0 | 0 |
| NM_014379 | 1 | 1 | 1 | 0 | 0 | 0 |
| NM_014380 | 1 | 0 | 1 | 1 | 0 | 1 |
| NM_014381 | 1 | 0 | 1 | 0 | 1 | 1 |
| NM_014382 | 1 | 0 | 1 | 0 | 1 | 1 |
| NM_014383 | 1 | 0 | 1 | 0 | 0 | 1 |
| NM_014384 | 1 | 0 | 1 | 0 | 0 | 0 |
| NM_014385 | 1 | 1 | 1 | 1 | 0 | 0 |
| NM_014386 | 0 | 0 | 1 | 0 | 0 | 0 |
| NM_014387 | 1 | 0 | 1 | 0 | 0 | 0 |
| NM_014388 | 1 | 1 | 1 | 1 | 1 | 0 |
| NM_014389 | 1 | 0 | 1 | 0 | 0 | 0 |
| NM_014390 | 1 | 0 | 1 | 1 | 1 | 1 |
| NM_014391 | 1 | 0 | 1 | 0 | 0 | 0 |
| NM_014392 | 1 | 0 | 1 | 0 | 1 | 1 |
| NM_014393 | 1 | 1 | 1 | 0 | 0 | 0 |
| NM_014394 | 1 | 0 | 0 | 0 | 0 | 1 |
| NM_014395 | 1 | 0 | 1 | 0 | 1 | 1 |
| NM_014396 | 1 | 0 | 1 | 0 | 0 | 0 |
| NM_014397 | 1 | 1 | 1 | 1 | 1 | 1 |
| NM_014398 | 1 | 0 | 1 | 0 | 1 | 1 |
| NM_014399 | 1 | 0 | 1 | 1 | 1 | 1 |
| NM_014400 | 0 | 0 | 0 | 0 | 0 | 1 |
| NM_014402 | 1 | 0 | 1 | 0 | 0 | 1 |
| NM_014403 | 1 | 1 | 1 | 1 | 0 | 0 |
| NM_014404 | 1 | 0 | 1 | 1 | 0 | 0 |
| NM_014405 | 0 | 0 | 1 | 0 | 0 | 0 |
| NM_014407 | 1 | 1 | 1 | 1 | 0 | 1 |
| NM_014408 | 1 | 1 | 1 | 1 | 0 | 0 |
| NM_014409 | 1 | 0 | 1 | 0 | 0 | 0 |
| NM_014411 | 1 | 1 | 1 | 0 | 0 | 0 |
| NM_014412 | 1 | 0 | 1 | 1 | 0 | 0 |
| NM_014413 | 1 | 0 | 1 | 0 | 1 | 1 |
| NM_014415 | 1 | 0 | 1 | 0 | 0 | 0 |
| NM_014417 | 1 | 1 | 1 | 1 | 0 | 1 |
| NM_014418 | 1 | 0 | 1 | 0 | 0 | 0 |
| NM_014419 | 1 | 0 | 1 | 0 | 0 | 1 |
| NM_014420 | 0 | 0 | 1 | 0 | 0 | 0 |
| NM_014421 | 1 | 0 | 1 | 0 | 0 | 0 |
| NM_014422 | 1 | 0 | 1 | 0 | 0 | 0 |
| NM_014423 | 1 | 0 | 1 | 0 | 0 | 0 |

|           |   |   |   |   |   |   |
|-----------|---|---|---|---|---|---|
| NM_014424 | 0 | 0 | 0 | 0 | 0 | 1 |
| NM_014425 | 1 | 1 | 1 | 0 | 0 | 0 |
| NM_014426 | 1 | 0 | 1 | 0 | 1 | 0 |
| NM_014427 | 1 | 1 | 1 | 1 | 0 | 1 |
| NM_014428 | 1 | 1 | 1 | 1 | 0 | 0 |
| NM_014429 | 1 | 1 | 1 | 0 | 0 | 0 |
| NM_014430 | 1 | 1 | 1 | 1 | 0 | 1 |
| NM_014432 | 0 | 0 | 0 | 1 | 0 | 0 |
| NM_014433 | 1 | 1 | 1 | 1 | 0 | 1 |
| NM_014434 | 1 | 1 | 1 | 1 | 0 | 0 |
| NM_014435 | 1 | 1 | 1 | 1 | 0 | 0 |
| NM_014437 | 1 | 0 | 1 | 0 | 0 | 0 |
| NM_014439 | 0 | 0 | 0 | 0 | 0 | 1 |
| NM_014440 | 0 | 0 | 0 | 0 | 0 | 1 |
| NM_014441 | 1 | 1 | 1 | 1 | 1 | 1 |
| NM_014442 | 1 | 0 | 1 | 0 | 0 | 0 |
| NM_014443 | 1 | 0 | 0 | 0 | 0 | 1 |
| NM_014444 | 1 | 1 | 1 | 1 | 0 | 0 |
| NM_014445 | 1 | 0 | 1 | 1 | 0 | 0 |
| NM_014446 | 1 | 0 | 1 | 0 | 0 | 0 |
| NM_014447 | 1 | 0 | 1 | 1 | 0 | 1 |
| NM_014448 | 1 | 0 | 1 | 0 | 0 | 1 |
| NM_014449 | 1 | 1 | 1 | 1 | 0 | 1 |
| NM_014450 | 1 | 0 | 1 | 1 | 0 | 1 |
| NM_014452 | 1 | 0 | 1 | 1 | 0 | 0 |
| NM_014453 | 1 | 1 | 1 | 1 | 1 | 1 |
| NM_014454 | 1 | 1 | 1 | 1 | 0 | 1 |
| NM_014458 | 1 | 0 | 1 | 1 | 0 | 0 |
| NM_014459 | 1 | 1 | 1 | 1 | 0 | 0 |
| NM_014460 | 1 | 0 | 0 | 0 | 0 | 1 |
| NM_014461 | 1 | 0 | 0 | 0 | 0 | 0 |
| NM_014462 | 1 | 0 | 1 | 0 | 0 | 0 |
| NM_014463 | 1 | 0 | 1 | 0 | 0 | 0 |
| NM_014464 | 1 | 0 | 0 | 0 | 0 | 1 |
| NM_014465 | 1 | 1 | 1 | 1 | 0 | 0 |
| NM_014468 | 1 | 1 | 1 | 1 | 0 | 0 |
| NM_014469 | 1 | 0 | 1 | 0 | 0 | 0 |
| NM_014470 | 1 | 0 | 1 | 0 | 0 | 0 |
| NM_014471 | 1 | 0 | 0 | 0 | 0 | 1 |
| NM_014472 | 1 | 1 | 1 | 1 | 0 | 0 |
| NM_014473 | 1 | 0 | 1 | 1 | 0 | 1 |
| NM_014474 | 1 | 0 | 1 | 0 | 0 | 0 |
| NM_014475 | 1 | 1 | 1 | 1 | 1 | 0 |
| NM_014476 | 0 | 0 | 1 | 0 | 0 | 0 |
| NM_014478 | 1 | 0 | 1 | 1 | 0 | 0 |
| NM_014479 | 1 | 1 | 1 | 1 | 0 | 1 |
| NM_014480 | 1 | 1 | 1 | 1 | 0 | 0 |
| NM_014481 | 1 | 0 | 1 | 1 | 0 | 1 |
| NM_014482 | 1 | 0 | 1 | 0 | 0 | 1 |
| NM_014483 | 1 | 1 | 1 | 1 | 0 | 0 |
| NM_014485 | 1 | 1 | 1 | 1 | 0 | 0 |
| NM_014487 | 1 | 0 | 1 | 1 | 0 | 0 |

|           |   |   |   |   |   |   |
|-----------|---|---|---|---|---|---|
| NM_014488 | 1 | 0 | 1 | 0 | 0 | 1 |
| NM_014489 | 1 | 0 | 1 | 0 | 0 | 0 |
| NM_014491 | 1 | 1 | 1 | 1 | 1 | 0 |
| NM_014494 | 1 | 1 | 1 | 1 | 1 | 1 |
| NM_014496 | 1 | 1 | 1 | 1 | 0 | 0 |
| NM_014497 | 1 | 0 | 1 | 1 | 0 | 0 |
| NM_014498 | 1 | 0 | 1 | 0 | 0 | 0 |
| NM_014499 | 1 | 0 | 1 | 0 | 0 | 1 |
| NM_014500 | 1 | 0 | 1 | 1 | 1 | 1 |
| NM_014501 | 1 | 0 | 1 | 0 | 1 | 1 |
| NM_014502 | 1 | 1 | 1 | 1 | 0 | 0 |
| NM_014503 | 1 | 1 | 1 | 1 | 0 | 1 |
| NM_014504 | 1 | 0 | 1 | 0 | 0 | 0 |
| NM_014505 | 1 | 1 | 1 | 1 | 0 | 0 |
| NM_014506 | 1 | 1 | 1 | 1 | 0 | 0 |
| NM_014507 | 1 | 0 | 1 | 1 | 0 | 0 |
| NM_014508 | 1 | 0 | 1 | 0 | 0 | 1 |
| NM_014509 | 1 | 0 | 1 | 0 | 0 | 1 |
| NM_014512 | 1 | 1 | 1 | 1 | 1 | 1 |
| NM_014513 | 1 | 0 | 1 | 0 | 0 | 1 |
| NM_014514 | 1 | 1 | 1 | 1 | 0 | 0 |
| NM_014515 | 1 | 1 | 1 | 1 | 0 | 0 |
| NM_014516 | 1 | 0 | 1 | 1 | 0 | 0 |
| NM_014517 | 1 | 1 | 1 | 1 | 1 | 1 |
| NM_014519 | 1 | 1 | 1 | 1 | 0 | 0 |
| NM_014520 | 1 | 1 | 1 | 1 | 0 | 1 |
| NM_014521 | 1 | 1 | 1 | 1 | 1 | 1 |
| NM_014522 | 1 | 0 | 0 | 0 | 0 | 0 |
| NM_014547 | 1 | 0 | 1 | 0 | 0 | 0 |
| NM_014548 | 0 | 0 | 0 | 0 | 0 | 1 |
| NM_014549 | 1 | 1 | 1 | 1 | 0 | 0 |
| NM_014550 | 1 | 0 | 1 | 0 | 0 | 0 |
| NM_014551 | 1 | 0 | 1 | 0 | 0 | 0 |
| NM_014552 | 1 | 1 | 1 | 1 | 0 | 0 |
| NM_014553 | 1 | 1 | 1 | 1 | 0 | 1 |
| NM_014554 | 1 | 0 | 1 | 0 | 0 | 0 |
| NM_014555 | 1 | 1 | 1 | 1 | 0 | 0 |
| NM_014562 | 1 | 1 | 1 | 1 | 0 | 1 |
| NM_014563 | 1 | 0 | 1 | 1 | 0 | 1 |
| NM_014564 | 1 | 0 | 1 | 1 | 0 | 0 |
| NM_014566 | 1 | 0 | 0 | 0 | 0 | 1 |
| NM_014567 | 1 | 0 | 1 | 0 | 0 | 1 |
| NM_014568 | 1 | 0 | 1 | 1 | 0 | 0 |
| NM_014569 | 1 | 0 | 1 | 1 | 0 | 0 |
| NM_014570 | 1 | 0 | 1 | 0 | 0 | 0 |
| NM_014571 | 1 | 0 | 1 | 0 | 0 | 0 |
| NM_014572 | 1 | 1 | 1 | 1 | 0 | 0 |
| NM_014573 | 1 | 1 | 1 | 1 | 0 | 1 |
| NM_014574 | 1 | 0 | 1 | 0 | 0 | 0 |
| NM_014575 | 1 | 1 | 1 | 1 | 0 | 0 |
| NM_014576 | 0 | 0 | 1 | 0 | 0 | 0 |
| NM_014577 | 1 | 0 | 1 | 0 | 0 | 0 |

|           |   |   |   |   |   |   |
|-----------|---|---|---|---|---|---|
| NM_014578 | 1 | 0 | 1 | 0 | 0 | 0 |
| NM_014579 | 0 | 1 | 0 | 0 | 0 | 0 |
| NM_014580 | 1 | 0 | 1 | 0 | 0 | 0 |
| NM_014581 | 0 | 1 | 0 | 0 | 0 | 1 |
| NM_014582 | 0 | 0 | 1 | 0 | 0 | 0 |
| NM_014583 | 1 | 0 | 1 | 0 | 0 | 1 |
| NM_014584 | 1 | 1 | 1 | 1 | 0 | 1 |
| NM_014585 | 1 | 1 | 1 | 1 | 0 | 1 |
| NM_014587 | 1 | 1 | 1 | 1 | 0 | 0 |
| NM_014588 | 1 | 0 | 0 | 0 | 0 | 0 |
| NM_014592 | 0 | 0 | 0 | 0 | 0 | 1 |
| NM_014593 | 1 | 0 | 1 | 1 | 0 | 0 |
| NM_014595 | 1 | 1 | 1 | 1 | 1 | 0 |
| NM_014597 | 1 | 0 | 1 | 0 | 0 | 0 |
| NM_014599 | 1 | 0 | 1 | 1 | 0 | 1 |
| NM_014600 | 1 | 0 | 1 | 0 | 1 | 0 |
| NM_014601 | 1 | 0 | 1 | 0 | 0 | 0 |
| NM_014602 | 1 | 0 | 1 | 1 | 0 | 1 |
| NM_014603 | 1 | 0 | 1 | 1 | 0 | 1 |
| NM_014604 | 1 | 0 | 1 | 0 | 0 | 0 |
| NM_014606 | 1 | 0 | 1 | 0 | 0 | 0 |
| NM_014607 | 1 | 0 | 1 | 0 | 0 | 0 |
| NM_014608 | 1 | 1 | 1 | 1 | 1 | 1 |
| NM_014610 | 1 | 0 | 1 | 0 | 0 | 0 |
| NM_014611 | 1 | 0 | 1 | 0 | 0 | 0 |
| NM_014612 | 1 | 0 | 1 | 1 | 1 | 1 |
| NM_014613 | 1 | 0 | 1 | 0 | 1 | 1 |
| NM_014617 | 1 | 0 | 1 | 1 | 0 | 0 |
| NM_014619 | 1 | 0 | 0 | 0 | 0 | 1 |
| NM_014620 | 1 | 0 | 1 | 0 | 0 | 0 |
| NM_014621 | 0 | 1 | 0 | 1 | 0 | 0 |
| NM_014622 | 1 | 1 | 1 | 1 | 0 | 0 |
| NM_014623 | 1 | 0 | 1 | 0 | 0 | 0 |
| NM_014624 | 1 | 0 | 1 | 1 | 1 | 1 |
| NM_014626 | 1 | 0 | 0 | 0 | 0 | 0 |
| NM_014628 | 1 | 0 | 1 | 0 | 0 | 0 |
| NM_014629 | 1 | 0 | 1 | 0 | 0 | 1 |
| NM_014630 | 1 | 0 | 1 | 0 | 0 | 0 |
| NM_014631 | 1 | 1 | 1 | 1 | 0 | 0 |
| NM_014632 | 1 | 1 | 1 | 1 | 0 | 0 |
| NM_014633 | 1 | 0 | 1 | 1 | 0 | 0 |
| NM_014634 | 1 | 0 | 1 | 1 | 0 | 0 |
| NM_014635 | 1 | 0 | 1 | 0 | 1 | 0 |
| NM_014636 | 1 | 0 | 1 | 0 | 0 | 1 |
| NM_014637 | 1 | 1 | 1 | 1 | 0 | 1 |
| NM_014638 | 1 | 1 | 1 | 1 | 0 | 0 |
| NM_014639 | 1 | 0 | 1 | 1 | 1 | 1 |
| NM_014640 | 1 | 1 | 1 | 1 | 0 | 0 |
| NM_014641 | 1 | 0 | 1 | 1 | 1 | 1 |
| NM_014642 | 1 | 1 | 1 | 1 | 1 | 0 |
| NM_014643 | 1 | 0 | 1 | 0 | 1 | 1 |
| NM_014645 | 1 | 0 | 1 | 1 | 0 | 0 |

|           |   |   |   |   |   |   |
|-----------|---|---|---|---|---|---|
| NM_014646 | 1 | 1 | 1 | 1 | 1 | 1 |
| NM_014648 | 1 | 0 | 1 | 0 | 0 | 0 |
| NM_014649 | 1 | 1 | 1 | 1 | 0 | 1 |
| NM_014650 | 0 | 0 | 1 | 0 | 0 | 0 |
| NM_014652 | 1 | 0 | 1 | 0 | 0 | 0 |
| NM_014654 | 1 | 1 | 1 | 1 | 0 | 1 |
| NM_014656 | 1 | 1 | 1 | 1 | 0 | 0 |
| NM_014657 | 1 | 0 | 1 | 0 | 1 | 1 |
| NM_014659 | 1 | 1 | 1 | 1 | 1 | 1 |
| NM_014660 | 1 | 0 | 1 | 1 | 1 | 1 |
| NM_014661 | 1 | 0 | 1 | 1 | 0 | 0 |
| NM_014662 | 1 | 1 | 1 | 1 | 1 | 1 |
| NM_014663 | 1 | 0 | 1 | 1 | 0 | 0 |
| NM_014664 | 1 | 1 | 1 | 1 | 1 | 1 |
| NM_014665 | 1 | 0 | 1 | 1 | 0 | 0 |
| NM_014666 | 1 | 1 | 1 | 1 | 0 | 1 |
| NM_014668 | 0 | 0 | 1 | 0 | 0 | 1 |
| NM_014669 | 1 | 1 | 1 | 1 | 0 | 1 |
| NM_014670 | 1 | 0 | 1 | 0 | 0 | 1 |
| NM_014671 | 1 | 1 | 1 | 1 | 0 | 0 |
| NM_014672 | 1 | 0 | 1 | 1 | 0 | 1 |
| NM_014673 | 1 | 1 | 1 | 1 | 0 | 0 |
| NM_014674 | 1 | 0 | 1 | 1 | 0 | 1 |
| NM_014675 | 1 | 0 | 1 | 1 | 1 | 1 |
| NM_014676 | 1 | 0 | 1 | 0 | 0 | 0 |
| NM_014678 | 1 | 1 | 1 | 0 | 0 | 1 |
| NM_014679 | 1 | 0 | 1 | 1 | 1 | 1 |
| NM_014681 | 1 | 1 | 1 | 1 | 0 | 0 |
| NM_014683 | 1 | 0 | 1 | 1 | 1 | 0 |
| NM_014684 | 1 | 0 | 1 | 1 | 0 | 0 |
| NM_014685 | 1 | 0 | 1 | 1 | 0 | 1 |
| NM_014686 | 1 | 1 | 1 | 1 | 0 | 0 |
| NM_014688 | 1 | 0 | 1 | 1 | 0 | 0 |
| NM_014690 | 1 | 0 | 1 | 0 | 0 | 0 |
| NM_014693 | 1 | 0 | 1 | 0 | 0 | 0 |
| NM_014694 | 1 | 1 | 1 | 1 | 0 | 0 |
| NM_014696 | 1 | 0 | 0 | 0 | 0 | 1 |
| NM_014697 | 1 | 0 | 1 | 0 | 1 | 1 |
| NM_014698 | 1 | 0 | 1 | 1 | 0 | 1 |
| NM_014699 | 1 | 0 | 1 | 1 | 0 | 0 |
| NM_014700 | 1 | 0 | 1 | 0 | 1 | 1 |
| NM_014703 | 1 | 1 | 1 | 1 | 0 | 1 |
| NM_014704 | 1 | 0 | 1 | 1 | 1 | 1 |
| NM_014705 | 1 | 0 | 1 | 0 | 0 | 0 |
| NM_014706 | 1 | 0 | 1 | 1 | 0 | 0 |
| NM_014707 | 1 | 1 | 1 | 1 | 0 | 0 |
| NM_014708 | 1 | 0 | 1 | 1 | 0 | 1 |
| NM_014710 | 1 | 1 | 1 | 1 | 1 | 1 |
| NM_014711 | 1 | 0 | 1 | 0 | 0 | 1 |
| NM_014713 | 1 | 0 | 1 | 1 | 0 | 1 |
| NM_014714 | 1 | 0 | 1 | 0 | 0 | 0 |
| NM_014715 | 1 | 0 | 1 | 1 | 1 | 1 |

|           |   |   |   |   |   |   |
|-----------|---|---|---|---|---|---|
| NM_014716 | 1 | 1 | 1 | 1 | 0 | 0 |
| NM_014717 | 1 | 1 | 1 | 0 | 0 | 1 |
| NM_014718 | 1 | 0 | 1 | 0 | 0 | 1 |
| NM_014719 | 1 | 1 | 1 | 1 | 0 | 1 |
| NM_014720 | 1 | 0 | 1 | 0 | 0 | 0 |
| NM_014721 | 1 | 0 | 1 | 0 | 0 | 0 |
| NM_014723 | 1 | 1 | 1 | 1 | 1 | 1 |
| NM_014724 | 1 | 1 | 1 | 0 | 0 | 0 |
| NM_014725 | 1 | 1 | 1 | 1 | 1 | 1 |
| NM_014726 | 1 | 1 | 1 | 1 | 1 | 1 |
| NM_014727 | 1 | 0 | 1 | 0 | 0 | 1 |
| NM_014729 | 1 | 0 | 1 | 1 | 1 | 1 |
| NM_014730 | 1 | 1 | 1 | 0 | 0 | 1 |
| NM_014731 | 1 | 1 | 1 | 1 | 0 | 0 |
| NM_014732 | 1 | 1 | 1 | 1 | 0 | 1 |
| NM_014733 | 1 | 1 | 1 | 1 | 0 | 0 |
| NM_014734 | 1 | 0 | 1 | 1 | 1 | 1 |
| NM_014735 | 1 | 1 | 1 | 1 | 0 | 1 |
| NM_014736 | 1 | 1 | 1 | 0 | 1 | 1 |
| NM_014737 | 1 | 1 | 1 | 1 | 1 | 1 |
| NM_014738 | 1 | 1 | 1 | 1 | 1 | 1 |
| NM_014739 | 1 | 1 | 1 | 1 | 1 | 1 |
| NM_014740 | 1 | 0 | 1 | 1 | 0 | 0 |
| NM_014741 | 1 | 1 | 1 | 1 | 1 | 1 |
| NM_014742 | 1 | 1 | 1 | 1 | 0 | 0 |
| NM_014744 | 1 | 0 | 1 | 0 | 0 | 0 |
| NM_014745 | 1 | 1 | 1 | 1 | 0 | 0 |
| NM_014746 | 1 | 1 | 1 | 1 | 1 | 0 |
| NM_014747 | 1 | 1 | 1 | 1 | 1 | 0 |
| NM_014748 | 1 | 1 | 1 | 1 | 0 | 0 |
| NM_014749 | 1 | 1 | 1 | 1 | 0 | 0 |
| NM_014750 | 1 | 0 | 1 | 0 | 1 | 1 |
| NM_014751 | 1 | 0 | 1 | 1 | 1 | 1 |
| NM_014752 | 1 | 0 | 1 | 0 | 0 | 0 |
| NM_014753 | 1 | 1 | 1 | 1 | 0 | 1 |
| NM_014754 | 1 | 1 | 1 | 1 | 0 | 1 |
| NM_014755 | 1 | 1 | 1 | 1 | 1 | 1 |
| NM_014756 | 1 | 0 | 1 | 1 | 1 | 1 |
| NM_014757 | 1 | 1 | 1 | 1 | 0 | 1 |
| NM_014758 | 1 | 0 | 1 | 0 | 0 | 0 |
| NM_014759 | 1 | 0 | 1 | 1 | 0 | 0 |
| NM_014760 | 1 | 1 | 1 | 1 | 1 | 1 |
| NM_014761 | 1 | 0 | 1 | 0 | 0 | 0 |
| NM_014762 | 1 | 1 | 1 | 1 | 0 | 0 |
| NM_014763 | 1 | 0 | 1 | 0 | 0 | 1 |
| NM_014764 | 1 | 0 | 1 | 1 | 1 | 1 |
| NM_014765 | 1 | 1 | 1 | 1 | 0 | 0 |
| NM_014766 | 1 | 0 | 1 | 0 | 0 | 1 |
| NM_014767 | 1 | 0 | 1 | 1 | 1 | 1 |
| NM_014769 | 1 | 0 | 1 | 0 | 0 | 1 |
| NM_014770 | 1 | 0 | 1 | 1 | 0 | 0 |
| NM_014771 | 1 | 0 | 1 | 0 | 0 | 0 |

|           |   |   |   |   |   |   |
|-----------|---|---|---|---|---|---|
| NM_014772 | 1 | 0 | 1 | 1 | 0 | 1 |
| NM_014773 | 1 | 1 | 1 | 1 | 1 | 1 |
| NM_014774 | 1 | 0 | 1 | 0 | 1 | 1 |
| NM_014777 | 1 | 1 | 1 | 1 | 0 | 0 |
| NM_014778 | 1 | 0 | 1 | 1 | 0 | 0 |
| NM_014779 | 1 | 0 | 1 | 1 | 0 | 0 |
| NM_014780 | 1 | 1 | 1 | 1 | 1 | 0 |
| NM_014781 | 1 | 1 | 1 | 1 | 1 | 1 |
| NM_014783 | 1 | 0 | 1 | 0 | 0 | 1 |
| NM_014784 | 1 | 0 | 1 | 0 | 0 | 0 |
| NM_014785 | 1 | 0 | 1 | 0 | 0 | 0 |
| NM_014786 | 1 | 1 | 1 | 0 | 0 | 1 |
| NM_014788 | 1 | 0 | 1 | 1 | 0 | 1 |
| NM_014790 | 1 | 1 | 1 | 1 | 0 | 0 |
| NM_014791 | 1 | 0 | 1 | 0 | 1 | 1 |
| NM_014792 | 1 | 1 | 1 | 1 | 1 | 1 |
| NM_014793 | 1 | 0 | 1 | 1 | 0 | 0 |
| NM_014795 | 1 | 1 | 1 | 1 | 1 | 1 |
| NM_014797 | 1 | 0 | 1 | 1 | 0 | 0 |
| NM_014800 | 1 | 0 | 1 | 0 | 0 | 1 |
| NM_014802 | 1 | 1 | 1 | 1 | 1 | 1 |
| NM_014804 | 1 | 0 | 1 | 0 | 1 | 0 |
| NM_014805 | 1 | 0 | 1 | 0 | 1 | 1 |
| NM_014807 | 1 | 1 | 1 | 0 | 1 | 0 |
| NM_014808 | 1 | 0 | 1 | 1 | 1 | 1 |
| NM_014809 | 1 | 0 | 1 | 1 | 0 | 1 |
| NM_014810 | 1 | 0 | 1 | 0 | 0 | 0 |
| NM_014811 | 1 | 1 | 1 | 1 | 1 | 1 |
| NM_014812 | 1 | 0 | 1 | 0 | 0 | 0 |
| NM_014813 | 1 | 1 | 1 | 1 | 0 | 1 |
| NM_014814 | 1 | 0 | 1 | 0 | 0 | 1 |
| NM_014815 | 1 | 0 | 1 | 0 | 0 | 0 |
| NM_014817 | 0 | 0 | 0 | 0 | 0 | 1 |
| NM_014819 | 1 | 1 | 1 | 1 | 0 | 1 |
| NM_014820 | 1 | 0 | 1 | 1 | 1 | 1 |
| NM_014821 | 1 | 0 | 1 | 1 | 0 | 0 |
| NM_014822 | 1 | 1 | 1 | 1 | 1 | 1 |
| NM_014823 | 1 | 1 | 1 | 1 | 1 | 1 |
| NM_014824 | 1 | 1 | 1 | 1 | 0 | 1 |
| NM_014826 | 1 | 0 | 1 | 1 | 1 | 1 |
| NM_014827 | 1 | 0 | 1 | 0 | 1 | 0 |
| NM_014828 | 1 | 1 | 1 | 1 | 0 | 0 |
| NM_014829 | 1 | 0 | 1 | 0 | 0 | 0 |
| NM_014830 | 1 | 0 | 1 | 1 | 1 | 1 |
| NM_014832 | 1 | 1 | 1 | 1 | 1 | 1 |
| NM_014834 | 1 | 1 | 1 | 1 | 0 | 0 |
| NM_014835 | 1 | 1 | 1 | 1 | 0 | 0 |
| NM_014836 | 1 | 0 | 1 | 0 | 0 | 1 |
| NM_014837 | 1 | 0 | 1 | 0 | 0 | 0 |
| NM_014838 | 1 | 1 | 1 | 1 | 0 | 0 |
| NM_014839 | 1 | 0 | 1 | 1 | 0 | 0 |
| NM_014840 | 1 | 1 | 1 | 1 | 1 | 1 |



|           |   |   |   |   |   |   |
|-----------|---|---|---|---|---|---|
| NM_014841 | 1 | 1 | 1 | 0 | 0 | 0 |
| NM_014844 | 1 | 1 | 1 | 1 | 0 | 1 |
| NM_014845 | 1 | 0 | 1 | 0 | 0 | 0 |
| NM_014846 | 1 | 0 | 1 | 1 | 0 | 1 |
| NM_014847 | 1 | 1 | 1 | 1 | 0 | 0 |
| NM_014848 | 0 | 0 | 1 | 0 | 0 | 1 |
| NM_014849 | 1 | 1 | 1 | 0 | 0 | 0 |
| NM_014850 | 1 | 0 | 1 | 0 | 0 | 0 |
| NM_014851 | 1 | 1 | 1 | 1 | 0 | 1 |
| NM_014852 | 1 | 1 | 1 | 1 | 0 | 1 |
| NM_014854 | 1 | 0 | 1 | 0 | 1 | 1 |
| NM_014856 | 1 | 0 | 1 | 1 | 0 | 0 |
| NM_014857 | 1 | 1 | 1 | 1 | 0 | 1 |
| NM_014858 | 1 | 0 | 1 | 1 | 0 | 0 |
| NM_014859 | 1 | 0 | 1 | 1 | 0 | 0 |
| NM_014860 | 1 | 0 | 1 | 1 | 1 | 1 |
| NM_014861 | 1 | 0 | 1 | 1 | 0 | 0 |
| NM_014862 | 1 | 1 | 0 | 1 | 0 | 0 |
| NM_014863 | 1 | 1 | 1 | 1 | 1 | 1 |
| NM_014864 | 1 | 0 | 1 | 1 | 0 | 0 |
| NM_014865 | 1 | 0 | 1 | 0 | 0 | 1 |
| NM_014867 | 1 | 1 | 1 | 1 | 1 | 1 |
| NM_014868 | 1 | 1 | 1 | 1 | 1 | 1 |
| NM_014869 | 1 | 1 | 1 | 1 | 1 | 1 |
| NM_014870 | 1 | 1 | 1 | 1 | 0 | 0 |
| NM_014871 | 1 | 0 | 1 | 1 | 0 | 0 |
| NM_014872 | 1 | 0 | 1 | 1 | 0 | 0 |
| NM_014873 | 1 | 1 | 1 | 1 | 1 | 1 |
| NM_014874 | 1 | 0 | 1 | 1 | 1 | 0 |
| NM_014875 | 1 | 1 | 1 | 0 | 0 | 0 |
| NM_014876 | 1 | 0 | 1 | 0 | 1 | 1 |
| NM_014877 | 1 | 0 | 1 | 1 | 0 | 0 |
| NM_014878 | 1 | 1 | 1 | 1 | 0 | 1 |
| NM_014879 | 1 | 1 | 1 | 1 | 1 | 1 |
| NM_014880 | 1 | 1 | 1 | 1 | 1 | 1 |
| NM_014881 | 1 | 1 | 1 | 1 | 0 | 1 |
| NM_014883 | 1 | 1 | 1 | 1 | 1 | 1 |
| NM_014885 | 1 | 0 | 1 | 1 | 0 | 0 |
| NM_014886 | 1 | 0 | 1 | 1 | 1 | 0 |
| NM_014887 | 1 | 0 | 1 | 0 | 0 | 0 |
| NM_014888 | 1 | 0 | 1 | 1 | 1 | 0 |
| NM_014890 | 1 | 0 | 1 | 0 | 1 | 0 |
| NM_014891 | 1 | 0 | 1 | 0 | 0 | 0 |
| NM_014892 | 1 | 0 | 1 | 1 | 0 | 0 |
| NM_014893 | 1 | 0 | 1 | 1 | 0 | 0 |
| NM_014894 | 1 | 0 | 1 | 1 | 0 | 0 |
| NM_014895 | 1 | 0 | 1 | 1 | 0 | 0 |
| NM_014896 | 1 | 0 | 1 | 0 | 0 | 0 |
| NM_014897 | 1 | 0 | 1 | 0 | 0 | 1 |
| NM_014898 | 1 | 1 | 1 | 0 | 0 | 0 |
| NM_014899 | 1 | 1 | 1 | 1 | 0 | 0 |
| NM_014900 | 1 | 0 | 1 | 1 | 1 | 1 |

|           |   |   |   |   |   |   |
|-----------|---|---|---|---|---|---|
| NM_014901 | 1 | 0 | 1 | 1 | 0 | 0 |
| NM_014902 | 1 | 0 | 1 | 0 | 0 | 1 |
| NM_014903 | 1 | 0 | 1 | 1 | 0 | 0 |
| NM_014904 | 1 | 0 | 1 | 1 | 0 | 0 |
| NM_014905 | 1 | 0 | 1 | 0 | 1 | 1 |
| NM_014906 | 0 | 0 | 0 | 0 | 0 | 1 |
| NM_014907 | 1 | 0 | 1 | 0 | 0 | 1 |
| NM_014908 | 1 | 0 | 1 | 1 | 0 | 0 |
| NM_014909 | 1 | 1 | 1 | 1 | 0 | 0 |
| NM_014910 | 0 | 0 | 0 | 0 | 0 | 1 |
| NM_014912 | 1 | 1 | 1 | 1 | 0 | 1 |
| NM_014913 | 1 | 0 | 1 | 0 | 0 | 0 |
| NM_014914 | 1 | 0 | 1 | 0 | 0 | 0 |
| NM_014915 | 1 | 1 | 1 | 1 | 0 | 1 |
| NM_014916 | 1 | 0 | 1 | 0 | 0 | 1 |
| NM_014917 | 0 | 0 | 0 | 0 | 0 | 1 |
| NM_014918 | 1 | 1 | 1 | 1 | 0 | 1 |
| NM_014920 | 1 | 0 | 1 | 0 | 1 | 1 |
| NM_014921 | 0 | 0 | 1 | 1 | 0 | 0 |
| NM_014922 | 1 | 0 | 1 | 0 | 0 | 1 |
| NM_014923 | 1 | 1 | 1 | 1 | 0 | 0 |
| NM_014924 | 1 | 1 | 1 | 1 | 1 | 1 |
| NM_014925 | 1 | 0 | 1 | 1 | 1 | 1 |
| NM_014926 | 1 | 0 | 0 | 0 | 0 | 0 |
| NM_014927 | 1 | 0 | 0 | 0 | 0 | 0 |
| NM_014928 | 1 | 0 | 1 | 0 | 0 | 0 |
| NM_014929 | 1 | 1 | 1 | 1 | 0 | 0 |
| NM_014930 | 1 | 0 | 1 | 0 | 0 | 0 |
| NM_014931 | 1 | 0 | 1 | 0 | 0 | 1 |
| NM_014932 | 1 | 0 | 1 | 0 | 0 | 0 |
| NM_014934 | 0 | 0 | 0 | 0 | 0 | 1 |
| NM_014935 | 1 | 0 | 1 | 0 | 0 | 0 |
| NM_014936 | 1 | 0 | 1 | 1 | 1 | 0 |
| NM_014937 | 1 | 1 | 1 | 1 | 1 | 1 |
| NM_014938 | 1 | 1 | 1 | 1 | 0 | 1 |
| NM_014939 | 1 | 0 | 1 | 0 | 0 | 0 |
| NM_014940 | 1 | 0 | 1 | 0 | 0 | 1 |
| NM_014941 | 1 | 1 | 1 | 1 | 0 | 0 |
| NM_014942 | 1 | 1 | 1 | 1 | 0 | 1 |
| NM_014943 | 1 | 1 | 1 | 1 | 1 | 0 |
| NM_014944 | 1 | 0 | 1 | 1 | 1 | 1 |
| NM_014945 | 1 | 0 | 1 | 0 | 0 | 1 |
| NM_014946 | 1 | 1 | 1 | 1 | 0 | 0 |
| NM_014947 | 1 | 0 | 1 | 1 | 0 | 0 |
| NM_014948 | 1 | 0 | 1 | 1 | 0 | 0 |
| NM_014949 | 1 | 0 | 1 | 0 | 0 | 0 |
| NM_014950 | 1 | 0 | 1 | 1 | 0 | 0 |
| NM_014951 | 1 | 0 | 1 | 1 | 0 | 1 |
| NM_014952 | 1 | 0 | 1 | 1 | 0 | 0 |
| NM_014953 | 1 | 0 | 1 | 0 | 0 | 0 |
| NM_014954 | 1 | 1 | 1 | 1 | 0 | 1 |
| NM_014956 | 1 | 0 | 1 | 0 | 0 | 0 |

|           |   |   |   |   |   |   |
|-----------|---|---|---|---|---|---|
| NM_014959 | 1 | 0 | 1 | 1 | 0 | 0 |
| NM_014960 | 1 | 0 | 1 | 0 | 0 | 0 |
| NM_014961 | 1 | 0 | 1 | 0 | 0 | 0 |
| NM_014962 | 1 | 1 | 1 | 1 | 0 | 1 |
| NM_014963 | 1 | 1 | 1 | 1 | 1 | 1 |
| NM_014964 | 1 | 0 | 1 | 0 | 0 | 0 |
| NM_014965 | 1 | 0 | 1 | 0 | 1 | 1 |
| NM_014966 | 1 | 1 | 1 | 1 | 1 | 1 |
| NM_014967 | 1 | 1 | 1 | 1 | 1 | 1 |
| NM_014968 | 1 | 1 | 1 | 1 | 1 | 1 |
| NM_014969 | 1 | 0 | 1 | 0 | 0 | 1 |
| NM_014970 | 1 | 0 | 1 | 1 | 1 | 1 |
| NM_014972 | 1 | 0 | 1 | 0 | 0 | 0 |
| NM_014977 | 1 | 0 | 1 | 0 | 0 | 0 |
| NM_014978 | 1 | 1 | 1 | 1 | 1 | 1 |
| NM_014982 | 1 | 1 | 1 | 1 | 1 | 1 |
| NM_014989 | 0 | 0 | 0 | 0 | 0 | 1 |
| NM_014991 | 1 | 1 | 1 | 1 | 1 | 1 |
| NM_014992 | 1 | 1 | 1 | 0 | 0 | 0 |
| NM_014999 | 1 | 0 | 1 | 1 | 0 | 1 |
| NM_015000 | 1 | 1 | 1 | 1 | 0 | 0 |
| NM_015001 | 1 | 0 | 1 | 1 | 0 | 1 |
| NM_015002 | 1 | 0 | 1 | 1 | 1 | 1 |
| NM_015003 | 1 | 0 | 1 | 0 | 1 | 1 |
| NM_015004 | 1 | 1 | 1 | 1 | 0 | 0 |
| NM_015013 | 1 | 1 | 1 | 1 | 0 | 0 |
| NM_015017 | 1 | 0 | 1 | 0 | 0 | 0 |
| NM_015018 | 1 | 0 | 1 | 1 | 0 | 0 |
| NM_015023 | 1 | 0 | 1 | 1 | 0 | 0 |
| NM_015024 | 1 | 1 | 1 | 0 | 1 | 0 |
| NM_015029 | 1 | 1 | 1 | 1 | 0 | 0 |
| NM_015032 | 1 | 1 | 1 | 1 | 1 | 1 |
| NM_015035 | 1 | 1 | 1 | 1 | 0 | 0 |
| NM_015039 | 1 | 0 | 1 | 0 | 0 | 0 |
| NM_015043 | 1 | 1 | 1 | 1 | 0 | 0 |
| NM_015044 | 1 | 1 | 1 | 1 | 0 | 0 |
| NM_015046 | 1 | 1 | 1 | 1 | 0 | 1 |
| NM_015047 | 1 | 0 | 1 | 1 | 0 | 0 |
| NM_015049 | 1 | 1 | 1 | 1 | 0 | 0 |
| NM_015050 | 1 | 0 | 1 | 1 | 0 | 1 |
| NM_015052 | 1 | 0 | 0 | 0 | 0 | 0 |
| NM_015055 | 1 | 0 | 1 | 1 | 0 | 0 |
| NM_015057 | 1 | 0 | 1 | 0 | 1 | 0 |
| NM_015059 | 1 | 0 | 0 | 0 | 0 | 1 |
| NM_015061 | 1 | 0 | 1 | 1 | 0 | 0 |
| NM_015062 | 1 | 1 | 1 | 1 | 0 | 1 |
| NM_015064 | 0 | 0 | 1 | 0 | 0 | 0 |
| NM_015065 | 1 | 1 | 1 | 1 | 1 | 1 |
| NM_015066 | 1 | 0 | 1 | 0 | 0 | 1 |
| NM_015068 | 1 | 0 | 0 | 0 | 0 | 1 |
| NM_015070 | 1 | 1 | 1 | 1 | 0 | 0 |
| NM_015071 | 1 | 0 | 1 | 0 | 0 | 1 |

|           |   |   |   |   |   |   |
|-----------|---|---|---|---|---|---|
| NM_015072 | 1 | 0 | 1 | 1 | 0 | 0 |
| NM_015074 | 1 | 0 | 1 | 0 | 0 | 1 |
| NM_015076 | 1 | 1 | 1 | 1 | 0 | 0 |
| NM_015077 | 1 | 0 | 1 | 0 | 0 | 0 |
| NM_015078 | 1 | 0 | 1 | 1 | 0 | 0 |
| NM_015079 | 1 | 1 | 1 | 1 | 0 | 0 |
| NM_015080 | 1 | 1 | 1 | 1 | 0 | 0 |
| NM_015084 | 1 | 1 | 1 | 1 | 1 | 1 |
| NM_015087 | 1 | 1 | 1 | 1 | 1 | 0 |
| NM_015089 | 1 | 0 | 1 | 0 | 0 | 0 |
| NM_015092 | 1 | 0 | 1 | 1 | 0 | 0 |
| NM_015094 | 1 | 1 | 1 | 1 | 0 | 0 |
| NM_015099 | 1 | 0 | 1 | 0 | 0 | 0 |
| NM_015101 | 1 | 1 | 1 | 1 | 1 | 0 |
| NM_015102 | 1 | 0 | 1 | 0 | 0 | 0 |
| NM_015103 | 1 | 1 | 1 | 1 | 0 | 0 |
| NM_015106 | 1 | 0 | 1 | 1 | 1 | 1 |
| NM_015107 | 1 | 0 | 1 | 0 | 1 | 1 |
| NM_015110 | 1 | 0 | 1 | 0 | 0 | 1 |
| NM_015112 | 1 | 1 | 1 | 1 | 0 | 0 |
| NM_015113 | 1 | 0 | 1 | 0 | 0 | 0 |
| NM_015115 | 1 | 0 | 1 | 1 | 0 | 0 |
| NM_015117 | 1 | 0 | 1 | 1 | 0 | 0 |
| NM_015120 | 1 | 1 | 1 | 1 | 1 | 1 |
| NM_015122 | 1 | 1 | 1 | 0 | 0 | 0 |
| NM_015125 | 1 | 1 | 1 | 1 | 0 | 0 |
| NM_015127 | 1 | 0 | 1 | 0 | 1 | 1 |
| NM_015129 | 1 | 1 | 1 | 1 | 0 | 1 |
| NM_015132 | 1 | 1 | 1 | 0 | 0 | 0 |
| NM_015133 | 1 | 0 | 1 | 1 | 0 | 0 |
| NM_015134 | 1 | 1 | 1 | 1 | 0 | 0 |
| NM_015136 | 1 | 1 | 1 | 1 | 0 | 0 |
| NM_015138 | 1 | 0 | 1 | 0 | 0 | 0 |
| NM_015139 | 1 | 0 | 1 | 0 | 0 | 1 |
| NM_015140 | 1 | 1 | 1 | 0 | 0 | 0 |
| NM_015141 | 1 | 1 | 1 | 0 | 0 | 0 |
| NM_015143 | 1 | 0 | 1 | 0 | 1 | 1 |
| NM_015144 | 1 | 0 | 1 | 1 | 0 | 0 |
| NM_015147 | 1 | 0 | 1 | 0 | 0 | 0 |
| NM_015148 | 1 | 1 | 1 | 1 | 0 | 0 |
| NM_015149 | 1 | 1 | 1 | 1 | 0 | 0 |
| NM_015151 | 1 | 0 | 1 | 1 | 0 | 0 |
| NM_015153 | 1 | 1 | 1 | 1 | 0 | 0 |
| NM_015156 | 1 | 0 | 1 | 0 | 0 | 0 |
| NM_015160 | 1 | 1 | 1 | 1 | 0 | 0 |
| NM_015161 | 1 | 0 | 1 | 0 | 0 | 0 |
| NM_015162 | 1 | 0 | 1 | 1 | 1 | 0 |
| NM_015163 | 1 | 0 | 1 | 0 | 1 | 1 |
| NM_015167 | 1 | 1 | 1 | 1 | 1 | 1 |
| NM_015169 | 1 | 1 | 1 | 1 | 0 | 0 |
| NM_015173 | 1 | 0 | 1 | 0 | 1 | 1 |
| NM_015176 | 1 | 0 | 1 | 0 | 0 | 0 |

|           |   |   |   |   |   |   |
|-----------|---|---|---|---|---|---|
| NM_015178 | 1 | 1 | 1 | 1 | 0 | 0 |
| NM_015179 | 1 | 1 | 1 | 1 | 0 | 0 |
| NM_015184 | 1 | 1 | 1 | 0 | 0 | 1 |
| NM_015185 | 1 | 1 | 1 | 1 | 1 | 1 |
| NM_015186 | 1 | 1 | 1 | 1 | 1 | 1 |
| NM_015190 | 1 | 0 | 1 | 1 | 0 | 1 |
| NM_015192 | 1 | 1 | 1 | 1 | 1 | 1 |
| NM_015196 | 1 | 1 | 1 | 1 | 0 | 0 |
| NM_015198 | 1 | 1 | 1 | 1 | 0 | 1 |
| NM_015200 | 1 | 0 | 1 | 1 | 1 | 1 |
| NM_015201 | 1 | 1 | 1 | 1 | 0 | 0 |
| NM_015208 | 1 | 0 | 1 | 0 | 0 | 0 |
| NM_015216 | 1 | 0 | 1 | 0 | 0 | 0 |
| NM_015219 | 1 | 1 | 1 | 1 | 0 | 0 |
| NM_015224 | 1 | 1 | 1 | 1 | 0 | 0 |
| NM_015227 | 1 | 1 | 1 | 1 | 0 | 0 |
| NM_015229 | 1 | 1 | 1 | 1 | 1 | 1 |
| NM_015230 | 1 | 0 | 1 | 0 | 0 | 1 |
| NM_015235 | 1 | 0 | 1 | 0 | 0 | 0 |
| NM_015238 | 1 | 0 | 1 | 1 | 0 | 0 |
| NM_015239 | 1 | 1 | 1 | 1 | 0 | 1 |
| NM_015242 | 1 | 0 | 1 | 1 | 1 | 1 |
| NM_015247 | 1 | 1 | 1 | 1 | 0 | 0 |
| NM_015250 | 1 | 0 | 1 | 0 | 1 | 0 |
| NM_015251 | 1 | 0 | 1 | 0 | 0 | 0 |
| NM_015252 | 1 | 0 | 1 | 1 | 0 | 0 |
| NM_015254 | 1 | 1 | 1 | 1 | 0 | 0 |
| NM_015255 | 1 | 1 | 1 | 1 | 0 | 0 |
| NM_015256 | 1 | 1 | 1 | 1 | 0 | 1 |
| NM_015263 | 1 | 1 | 1 | 1 | 0 | 0 |
| NM_015271 | 1 | 1 | 1 | 1 | 1 | 1 |
| NM_015277 | 1 | 1 | 1 | 1 | 1 | 0 |
| NM_015278 | 1 | 1 | 1 | 1 | 0 | 1 |
| NM_015281 | 1 | 1 | 1 | 1 | 1 | 1 |
| NM_015282 | 1 | 0 | 1 | 0 | 0 | 0 |
| NM_015286 | 1 | 1 | 1 | 1 | 1 | 1 |
| NM_015288 | 1 | 0 | 1 | 1 | 0 | 0 |
| NM_015289 | 1 | 1 | 1 | 1 | 0 | 0 |
| NM_015292 | 1 | 1 | 1 | 1 | 0 | 0 |
| NM_015293 | 1 | 0 | 1 | 1 | 0 | 0 |
| NM_015294 | 1 | 0 | 1 | 0 | 1 | 1 |
| NM_015296 | 1 | 1 | 1 | 1 | 0 | 0 |
| NM_015305 | 1 | 1 | 1 | 1 | 0 | 0 |
| NM_015308 | 1 | 1 | 1 | 1 | 0 | 0 |
| NM_015310 | 1 | 1 | 1 | 0 | 1 | 0 |
| NM_015313 | 1 | 0 | 1 | 0 | 0 | 0 |
| NM_015315 | 1 | 1 | 1 | 1 | 0 | 0 |
| NM_015316 | 1 | 0 | 1 | 0 | 0 | 0 |
| NM_015317 | 1 | 0 | 1 | 0 | 1 | 0 |
| NM_015318 | 1 | 0 | 1 | 1 | 0 | 0 |
| NM_015320 | 1 | 0 | 1 | 1 | 0 | 0 |
| NM_015322 | 1 | 1 | 1 | 1 | 0 | 0 |

|           |   |   |   |   |   |   |
|-----------|---|---|---|---|---|---|
| NM_015323 | 1 | 0 | 1 | 0 | 1 | 1 |
| NM_015324 | 1 | 1 | 1 | 1 | 0 | 0 |
| NM_015327 | 1 | 0 | 1 | 1 | 1 | 1 |
| NM_015328 | 1 | 0 | 1 | 0 | 1 | 0 |
| NM_015331 | 1 | 0 | 1 | 0 | 1 | 1 |
| NM_015332 | 1 | 0 | 1 | 1 | 1 | 1 |
| NM_015336 | 1 | 0 | 1 | 0 | 0 | 1 |
| NM_015338 | 1 | 1 | 1 | 1 | 0 | 0 |
| NM_015340 | 1 | 0 | 1 | 0 | 0 | 1 |
| NM_015341 | 1 | 1 | 1 | 0 | 0 | 0 |
| NM_015342 | 1 | 0 | 1 | 1 | 0 | 0 |
| NM_015343 | 1 | 1 | 1 | 1 | 0 | 0 |
| NM_015344 | 1 | 0 | 1 | 1 | 0 | 0 |
| NM_015345 | 1 | 1 | 1 | 1 | 1 | 1 |
| NM_015346 | 1 | 0 | 1 | 1 | 0 | 0 |
| NM_015350 | 1 | 0 | 1 | 1 | 0 | 1 |
| NM_015352 | 1 | 1 | 1 | 0 | 0 | 0 |
| NM_015355 | 1 | 0 | 1 | 0 | 0 | 0 |
| NM_015356 | 1 | 0 | 1 | 0 | 0 | 0 |
| NM_015358 | 1 | 0 | 1 | 0 | 0 | 0 |
| NM_015360 | 1 | 0 | 1 | 0 | 0 | 0 |
| NM_015361 | 1 | 1 | 1 | 1 | 0 | 1 |
| NM_015362 | 1 | 0 | 1 | 0 | 0 | 0 |
| NM_015363 | 1 | 0 | 1 | 0 | 0 | 0 |
| NM_015364 | 1 | 0 | 1 | 1 | 1 | 1 |
| NM_015365 | 0 | 0 | 1 | 0 | 0 | 0 |
| NM_015367 | 1 | 1 | 1 | 1 | 0 | 1 |
| NM_015368 | 1 | 1 | 1 | 1 | 0 | 0 |
| NM_015369 | 1 | 1 | 1 | 1 | 0 | 1 |
| NM_015371 | 1 | 0 | 1 | 0 | 0 | 1 |
| NM_015373 | 1 | 0 | 1 | 0 | 1 | 1 |
| NM_015376 | 1 | 1 | 1 | 1 | 0 | 1 |
| NM_015377 | 1 | 1 | 1 | 1 | 0 | 1 |
| NM_015379 | 1 | 1 | 1 | 1 | 1 | 1 |
| NM_015380 | 1 | 1 | 1 | 1 | 0 | 0 |
| NM_015381 | 1 | 0 | 1 | 1 | 0 | 0 |
| NM_015382 | 1 | 0 | 1 | 0 | 0 | 0 |
| NM_015383 | 1 | 0 | 1 | 0 | 0 | 1 |
| NM_015384 | 1 | 0 | 1 | 0 | 1 | 1 |
| NM_015385 | 1 | 0 | 1 | 0 | 0 | 0 |
| NM_015386 | 1 | 0 | 1 | 0 | 0 | 0 |
| NM_015387 | 1 | 0 | 1 | 0 | 0 | 0 |
| NM_015388 | 1 | 1 | 1 | 1 | 0 | 0 |
| NM_015391 | 1 | 0 | 1 | 0 | 0 | 0 |
| NM_015392 | 1 | 0 | 1 | 0 | 0 | 1 |
| NM_015393 | 1 | 0 | 1 | 0 | 0 | 1 |
| NM_015394 | 1 | 1 | 1 | 1 | 1 | 1 |
| NM_015395 | 1 | 0 | 1 | 1 | 0 | 0 |
| NM_015396 | 1 | 1 | 1 | 1 | 0 | 1 |
| NM_015397 | 1 | 0 | 1 | 0 | 0 | 1 |
| NM_015399 | 1 | 0 | 1 | 0 | 0 | 0 |
| NM_015400 | 1 | 1 | 1 | 1 | 1 | 1 |

|           |   |   |   |   |   |   |
|-----------|---|---|---|---|---|---|
| NM_015407 | 1 | 1 | 1 | 1 | 0 | 0 |
| NM_015409 | 1 | 0 | 1 | 1 | 0 | 1 |
| NM_015411 | 1 | 0 | 1 | 1 | 0 | 0 |
| NM_015412 | 1 | 0 | 1 | 1 | 0 | 0 |
| NM_015414 | 1 | 0 | 1 | 1 | 1 | 1 |
| NM_015415 | 1 | 1 | 1 | 1 | 0 | 0 |
| NM_015416 | 1 | 1 | 1 | 1 | 0 | 0 |
| NM_015417 | 1 | 0 | 1 | 0 | 0 | 0 |
| NM_015419 | 1 | 0 | 1 | 0 | 0 | 0 |
| NM_015420 | 1 | 1 | 1 | 1 | 0 | 1 |
| NM_015421 | 1 | 1 | 1 | 1 | 0 | 0 |
| NM_015423 | 1 | 0 | 1 | 1 | 1 | 1 |
| NM_015424 | 1 | 0 | 1 | 0 | 0 | 0 |
| NM_015425 | 1 | 1 | 1 | 0 | 0 | 0 |
| NM_015426 | 1 | 0 | 1 | 0 | 1 | 1 |
| NM_015429 | 1 | 0 | 0 | 0 | 1 | 1 |
| NM_015430 | 1 | 0 | 1 | 1 | 0 | 0 |
| NM_015431 | 1 | 0 | 1 | 0 | 0 | 1 |
| NM_015433 | 1 | 0 | 1 | 0 | 0 | 1 |
| NM_015434 | 1 | 0 | 1 | 0 | 0 | 1 |
| NM_015435 | 1 | 1 | 1 | 1 | 1 | 0 |
| NM_015436 | 1 | 0 | 1 | 0 | 0 | 0 |
| NM_015438 | 1 | 1 | 1 | 1 | 0 | 0 |
| NM_015439 | 1 | 1 | 1 | 1 | 0 | 0 |
| NM_015440 | 1 | 1 | 1 | 1 | 0 | 0 |
| NM_015442 | 1 | 0 | 1 | 0 | 1 | 0 |
| NM_015443 | 1 | 0 | 1 | 1 | 0 | 0 |
| NM_015444 | 1 | 0 | 1 | 0 | 0 | 0 |
| NM_015446 | 1 | 0 | 1 | 1 | 1 | 1 |
| NM_015449 | 1 | 0 | 1 | 0 | 0 | 0 |
| NM_015450 | 1 | 1 | 1 | 0 | 0 | 0 |
| NM_015453 | 1 | 0 | 1 | 1 | 1 | 1 |
| NM_015455 | 1 | 0 | 1 | 0 | 0 | 0 |
| NM_015456 | 1 | 1 | 1 | 1 | 0 | 0 |
| NM_015458 | 1 | 0 | 1 | 0 | 0 | 0 |
| NM_015459 | 1 | 1 | 1 | 1 | 0 | 0 |
| NM_015460 | 1 | 0 | 1 | 0 | 0 | 0 |
| NM_015461 | 1 | 1 | 1 | 1 | 1 | 0 |
| NM_015462 | 1 | 1 | 1 | 1 | 0 | 0 |
| NM_015463 | 1 | 0 | 1 | 1 | 0 | 0 |
| NM_015464 | 1 | 0 | 0 | 0 | 0 | 0 |
| NM_015465 | 1 | 0 | 1 | 1 | 0 | 1 |
| NM_015466 | 1 | 1 | 1 | 1 | 0 | 0 |
| NM_015469 | 1 | 0 | 1 | 1 | 0 | 0 |
| NM_015470 | 1 | 0 | 1 | 1 | 0 | 0 |
| NM_015471 | 1 | 0 | 1 | 0 | 1 | 1 |
| NM_015474 | 1 | 0 | 1 | 0 | 0 | 0 |
| NM_015476 | 1 | 0 | 1 | 0 | 0 | 0 |
| NM_015477 | 1 | 0 | 1 | 0 | 1 | 1 |
| NM_015478 | 1 | 0 | 1 | 0 | 0 | 0 |
| NM_015480 | 1 | 0 | 1 | 0 | 0 | 0 |
| NM_015481 | 1 | 0 | 1 | 1 | 0 | 0 |

|           |   |   |   |   |   |   |
|-----------|---|---|---|---|---|---|
| NM_015484 | 1 | 1 | 1 | 1 | 0 | 0 |
| NM_015485 | 1 | 0 | 1 | 1 | 0 | 1 |
| NM_015488 | 1 | 0 | 1 | 1 | 0 | 0 |
| NM_015490 | 1 | 1 | 1 | 1 | 1 | 1 |
| NM_015492 | 1 | 0 | 1 | 1 | 0 | 0 |
| NM_015493 | 1 | 0 | 1 | 0 | 0 | 1 |
| NM_015497 | 1 | 0 | 1 | 0 | 0 | 0 |
| NM_015503 | 1 | 1 | 1 | 1 | 0 | 0 |
| NM_015507 | 1 | 0 | 1 | 0 | 0 | 0 |
| NM_015508 | 1 | 0 | 1 | 0 | 0 | 0 |
| NM_015509 | 1 | 0 | 1 | 0 | 0 | 1 |
| NM_015510 | 1 | 0 | 1 | 0 | 1 | 0 |
| NM_015511 | 1 | 1 | 1 | 1 | 1 | 1 |
| NM_015512 | 1 | 0 | 1 | 0 | 1 | 1 |
| NM_015513 | 1 | 0 | 1 | 0 | 0 | 0 |
| NM_015515 | 1 | 1 | 1 | 1 | 1 | 1 |
| NM_015516 | 1 | 1 | 1 | 1 | 0 | 0 |
| NM_015517 | 1 | 1 | 1 | 1 | 0 | 0 |
| NM_015522 | 1 | 1 | 1 | 1 | 0 | 0 |
| NM_015523 | 1 | 0 | 1 | 1 | 0 | 1 |
| NM_015524 | 1 | 1 | 1 | 1 | 0 | 1 |
| NM_015525 | 1 | 0 | 1 | 1 | 1 | 1 |
| NM_015526 | 1 | 0 | 1 | 0 | 0 | 0 |
| NM_015527 | 1 | 0 | 1 | 1 | 1 | 1 |
| NM_015528 | 1 | 0 | 1 | 1 | 0 | 1 |
| NM_015529 | 1 | 0 | 1 | 0 | 0 | 1 |
| NM_015530 | 1 | 1 | 1 | 1 | 0 | 1 |
| NM_015532 | 1 | 0 | 1 | 1 | 1 | 1 |
| NM_015533 | 1 | 1 | 1 | 1 | 1 | 1 |
| NM_015534 | 1 | 0 | 1 | 1 | 1 | 1 |
| NM_015535 | 1 | 1 | 1 | 0 | 1 | 1 |
| NM_015537 | 1 | 0 | 1 | 0 | 0 | 0 |
| NM_015540 | 1 | 0 | 1 | 1 | 1 | 1 |
| NM_015541 | 1 | 0 | 1 | 1 | 0 | 0 |
| NM_015542 | 1 | 1 | 1 | 1 | 0 | 0 |
| NM_015544 | 0 | 0 | 0 | 0 | 0 | 1 |
| NM_015545 | 1 | 1 | 1 | 1 | 1 | 1 |
| NM_015547 | 1 | 0 | 1 | 1 | 0 | 0 |
| NM_015548 | 1 | 0 | 1 | 0 | 1 | 1 |
| NM_015550 | 1 | 0 | 1 | 0 | 1 | 0 |
| NM_015555 | 1 | 0 | 1 | 1 | 0 | 0 |
| NM_015556 | 1 | 1 | 1 | 1 | 1 | 1 |
| NM_015557 | 1 | 0 | 1 | 1 | 0 | 0 |
| NM_015558 | 1 | 0 | 1 | 0 | 1 | 1 |
| NM_015559 | 1 | 1 | 1 | 1 | 1 | 1 |
| NM_015564 | 0 | 0 | 0 | 0 | 0 | 1 |
| NM_015565 | 1 | 0 | 1 | 0 | 0 | 1 |
| NM_015568 | 1 | 0 | 1 | 0 | 1 | 1 |
| NM_015569 | 1 | 1 | 1 | 1 | 1 | 1 |
| NM_015570 | 1 | 1 | 1 | 1 | 0 | 0 |
| NM_015571 | 1 | 0 | 1 | 0 | 0 | 0 |
| NM_015575 | 1 | 0 | 1 | 0 | 0 | 0 |



|           |   |   |   |   |   |   |
|-----------|---|---|---|---|---|---|
| NM_015577 | 1 | 0 | 1 | 1 | 0 | 1 |
| NM_015578 | 1 | 0 | 1 | 0 | 0 | 1 |
| NM_015582 | 1 | 0 | 1 | 0 | 0 | 0 |
| NM_015583 | 1 | 1 | 1 | 0 | 0 | 1 |
| NM_015584 | 1 | 0 | 1 | 0 | 0 | 1 |
| NM_015585 | 1 | 0 | 0 | 0 | 0 | 0 |
| NM_015589 | 1 | 0 | 1 | 0 | 0 | 0 |
| NM_015590 | 1 | 1 | 1 | 1 | 0 | 1 |
| NM_015592 | 1 | 1 | 1 | 1 | 0 | 1 |
| NM_015594 | 1 | 0 | 0 | 0 | 0 | 1 |
| NM_015595 | 1 | 0 | 1 | 0 | 0 | 1 |
| NM_015596 | 1 | 0 | 1 | 1 | 0 | 0 |
| NM_015597 | 1 | 1 | 1 | 0 | 0 | 1 |
| NM_015599 | 1 | 0 | 1 | 1 | 1 | 1 |
| NM_015600 | 1 | 1 | 1 | 1 | 0 | 0 |
| NM_015601 | 1 | 0 | 1 | 1 | 0 | 0 |
| NM_015602 | 1 | 0 | 1 | 0 | 0 | 1 |
| NM_015603 | 1 | 0 | 1 | 0 | 0 | 0 |
| NM_015607 | 1 | 0 | 1 | 1 | 0 | 1 |
| NM_015608 | 1 | 0 | 1 | 0 | 1 | 1 |
| NM_015609 | 1 | 0 | 1 | 0 | 0 | 1 |
| NM_015610 | 1 | 0 | 1 | 0 | 1 | 1 |
| NM_015613 | 0 | 0 | 0 | 0 | 0 | 1 |
| NM_015617 | 0 | 0 | 1 | 0 | 0 | 0 |
| NM_015621 | 1 | 1 | 1 | 1 | 0 | 0 |
| NM_015622 | 1 | 0 | 1 | 0 | 0 | 0 |
| NM_015623 | 1 | 1 | 1 | 1 | 0 | 1 |
| NM_015627 | 1 | 1 | 1 | 1 | 1 | 1 |
| NM_015629 | 1 | 1 | 1 | 1 | 0 | 1 |
| NM_015630 | 1 | 1 | 1 | 1 | 0 | 0 |
| NM_015631 | 1 | 0 | 1 | 1 | 0 | 0 |
| NM_015633 | 1 | 0 | 1 | 0 | 0 | 0 |
| NM_015634 | 1 | 0 | 1 | 0 | 0 | 0 |
| NM_015636 | 1 | 1 | 1 | 1 | 0 | 0 |
| NM_015638 | 1 | 0 | 1 | 1 | 0 | 0 |
| NM_015640 | 1 | 0 | 1 | 0 | 0 | 1 |
| NM_015641 | 1 | 1 | 1 | 1 | 0 | 1 |
| NM_015642 | 1 | 1 | 1 | 1 | 1 | 1 |
| NM_015644 | 1 | 0 | 1 | 0 | 0 | 1 |
| NM_015645 | 1 | 1 | 1 | 1 | 0 | 0 |
| NM_015646 | 1 | 0 | 1 | 0 | 1 | 0 |
| NM_015649 | 1 | 0 | 1 | 0 | 0 | 0 |
| NM_015650 | 1 | 0 | 1 | 0 | 0 | 0 |
| NM_015652 | 1 | 0 | 1 | 1 | 0 | 1 |
| NM_015653 | 1 | 0 | 1 | 0 | 0 | 1 |
| NM_015654 | 1 | 1 | 1 | 1 | 0 | 0 |
| NM_015655 | 1 | 0 | 1 | 1 | 0 | 0 |
| NM_015658 | 1 | 1 | 1 | 1 | 0 | 0 |
| NM_015660 | 1 | 1 | 1 | 1 | 0 | 1 |
| NM_015665 | 1 | 0 | 1 | 1 | 0 | 0 |
| NM_015666 | 1 | 0 | 1 | 0 | 0 | 0 |
| NM_015667 | 1 | 0 | 1 | 0 | 0 | 0 |

|           |   |   |   |   |   |   |
|-----------|---|---|---|---|---|---|
| NM_015669 | 1 | 0 | 1 | 0 | 0 | 0 |
| NM_015670 | 1 | 1 | 1 | 0 | 0 | 0 |
| NM_015671 | 1 | 0 | 1 | 1 | 0 | 0 |
| NM_015675 | 1 | 1 | 1 | 1 | 1 | 1 |
| NM_015677 | 1 | 0 | 1 | 1 | 1 | 1 |
| NM_015678 | 1 | 1 | 1 | 1 | 0 | 1 |
| NM_015679 | 1 | 1 | 1 | 1 | 0 | 0 |
| NM_015680 | 1 | 0 | 1 | 0 | 0 | 1 |
| NM_015681 | 1 | 1 | 1 | 0 | 0 | 1 |
| NM_015683 | 1 | 0 | 1 | 1 | 1 | 1 |
| NM_015684 | 1 | 0 | 1 | 1 | 0 | 0 |
| NM_015685 | 1 | 0 | 1 | 1 | 0 | 0 |
| NM_015686 | 1 | 0 | 1 | 0 | 0 | 0 |
| NM_015690 | 1 | 0 | 1 | 0 | 1 | 1 |
| NM_015691 | 1 | 1 | 1 | 1 | 1 | 1 |
| NM_015692 | 1 | 0 | 1 | 0 | 0 | 0 |
| NM_015693 | 1 | 0 | 1 | 0 | 0 | 0 |
| NM_015694 | 1 | 0 | 1 | 1 | 1 | 1 |
| NM_015696 | 1 | 0 | 1 | 0 | 0 | 0 |
| NM_015697 | 1 | 1 | 1 | 1 | 0 | 0 |
| NM_015698 | 1 | 0 | 1 | 1 | 1 | 0 |
| NM_015699 | 1 | 0 | 1 | 1 | 0 | 0 |
| NM_015700 | 1 | 0 | 1 | 1 | 0 | 1 |
| NM_015701 | 1 | 0 | 1 | 0 | 0 | 0 |
| NM_015702 | 1 | 1 | 1 | 1 | 0 | 0 |
| NM_015703 | 1 | 1 | 1 | 1 | 0 | 0 |
| NM_015705 | 1 | 0 | 1 | 1 | 0 | 0 |
| NM_015710 | 1 | 0 | 1 | 1 | 1 | 1 |
| NM_015711 | 1 | 0 | 1 | 0 | 0 | 0 |
| NM_015713 | 1 | 1 | 1 | 1 | 0 | 1 |
| NM_015714 | 1 | 1 | 1 | 1 | 1 | 1 |
| NM_015715 | 1 | 0 | 1 | 0 | 0 | 0 |
| NM_015716 | 1 | 0 | 1 | 1 | 0 | 0 |
| NM_015717 | 1 | 1 | 1 | 1 | 0 | 0 |
| NM_015719 | 1 | 1 | 1 | 0 | 0 | 0 |
| NM_015720 | 1 | 0 | 1 | 0 | 0 | 0 |
| NM_015721 | 1 | 1 | 1 | 1 | 0 | 1 |
| NM_015722 | 1 | 0 | 1 | 0 | 0 | 0 |
| NM_015725 | 1 | 0 | 1 | 1 | 0 | 0 |
| NM_015726 | 1 | 1 | 1 | 1 | 0 | 0 |
| NM_015831 | 1 | 0 | 1 | 0 | 0 | 0 |
| NM_015833 | 1 | 0 | 1 | 1 | 0 | 1 |
| NM_015834 | 1 | 1 | 1 | 1 | 0 | 1 |
| NM_015836 | 1 | 0 | 1 | 0 | 0 | 0 |
| NM_015838 | 1 | 1 | 1 | 1 | 1 | 1 |
| NM_015839 | 0 | 0 | 1 | 0 | 0 | 0 |
| NM_015840 | 1 | 1 | 1 | 1 | 1 | 1 |
| NM_015845 | 1 | 0 | 1 | 0 | 0 | 0 |
| NM_015847 | 1 | 0 | 1 | 0 | 0 | 1 |
| NM_015848 | 1 | 1 | 1 | 0 | 0 | 1 |
| NM_015850 | 1 | 0 | 1 | 0 | 0 | 1 |
| NM_015852 | 1 | 0 | 1 | 1 | 0 | 0 |

|           |   |   |   |   |   |   |
|-----------|---|---|---|---|---|---|
| NM_015853 | 1 | 1 | 1 | 1 | 0 | 0 |
| NM_015859 | 1 | 0 | 1 | 0 | 0 | 0 |
| NM_015864 | 1 | 1 | 1 | 1 | 1 | 1 |
| NM_015865 | 1 | 0 | 1 | 0 | 1 | 0 |
| NM_015866 | 1 | 1 | 1 | 0 | 0 | 1 |
| NM_015868 | 1 | 1 | 1 | 1 | 1 | 0 |
| NM_015869 | 1 | 1 | 1 | 1 | 0 | 1 |
| NM_015871 | 1 | 0 | 1 | 0 | 0 | 1 |
| NM_015872 | 1 | 1 | 1 | 1 | 1 | 1 |
| NM_015873 | 1 | 1 | 1 | 1 | 1 | 1 |
| NM_015874 | 1 | 1 | 1 | 1 | 0 | 1 |
| NM_015878 | 1 | 0 | 1 | 0 | 0 | 1 |
| NM_015883 | 1 | 0 | 1 | 0 | 0 | 0 |
| NM_015884 | 1 | 0 | 1 | 0 | 0 | 1 |
| NM_015885 | 1 | 0 | 1 | 0 | 0 | 0 |
| NM_015888 | 1 | 1 | 1 | 1 | 0 | 0 |
| NM_015889 | 1 | 0 | 1 | 0 | 1 | 0 |
| NM_015891 | 1 | 0 | 1 | 0 | 1 | 0 |
| NM_015892 | 1 | 1 | 1 | 1 | 0 | 0 |
| NM_015893 | 1 | 0 | 1 | 0 | 0 | 1 |
| NM_015894 | 1 | 1 | 1 | 1 | 1 | 1 |
| NM_015895 | 1 | 0 | 1 | 0 | 1 | 1 |
| NM_015896 | 1 | 0 | 1 | 1 | 1 | 0 |
| NM_015897 | 1 | 0 | 1 | 0 | 0 | 0 |
| NM_015898 | 1 | 0 | 1 | 0 | 0 | 1 |
| NM_015899 | 1 | 0 | 1 | 0 | 0 | 0 |
| NM_015900 | 0 | 0 | 1 | 0 | 0 | 0 |
| NM_015901 | 1 | 0 | 1 | 0 | 0 | 1 |
| NM_015902 | 1 | 0 | 1 | 1 | 0 | 0 |
| NM_015904 | 1 | 0 | 1 | 0 | 0 | 0 |
| NM_015905 | 1 | 1 | 1 | 1 | 0 | 1 |
| NM_015906 | 1 | 1 | 1 | 0 | 0 | 0 |
| NM_015907 | 1 | 1 | 1 | 1 | 1 | 1 |
| NM_015908 | 1 | 1 | 1 | 1 | 0 | 0 |
| NM_015909 | 1 | 1 | 1 | 1 | 1 | 1 |
| NM_015910 | 1 | 0 | 1 | 1 | 1 | 1 |
| NM_015911 | 1 | 0 | 1 | 0 | 0 | 0 |
| NM_015912 | 1 | 0 | 1 | 0 | 0 | 0 |
| NM_015913 | 1 | 0 | 1 | 1 | 0 | 0 |
| NM_015914 | 1 | 1 | 1 | 1 | 0 | 1 |
| NM_015915 | 1 | 0 | 1 | 1 | 1 | 0 |
| NM_015916 | 1 | 1 | 1 | 1 | 0 | 0 |
| NM_015917 | 1 | 1 | 1 | 1 | 1 | 1 |
| NM_015918 | 1 | 1 | 1 | 1 | 1 | 1 |
| NM_015919 | 1 | 0 | 1 | 1 | 0 | 0 |
| NM_015920 | 1 | 0 | 1 | 0 | 0 | 1 |
| NM_015921 | 1 | 1 | 1 | 1 | 0 | 1 |
| NM_015922 | 1 | 1 | 1 | 1 | 0 | 1 |
| NM_015925 | 1 | 1 | 1 | 1 | 0 | 1 |
| NM_015926 | 1 | 1 | 1 | 1 | 0 | 0 |
| NM_015927 | 1 | 0 | 1 | 1 | 0 | 0 |
| NM_015928 | 1 | 0 | 1 | 0 | 0 | 0 |

|           |   |   |   |   |   |   |
|-----------|---|---|---|---|---|---|
| NM_015930 | 1 | 0 | 1 | 0 | 0 | 1 |
| NM_015932 | 1 | 0 | 1 | 0 | 1 | 1 |
| NM_015934 | 1 | 1 | 1 | 1 | 0 | 0 |
| NM_015935 | 1 | 0 | 1 | 1 | 0 | 0 |
| NM_015936 | 1 | 1 | 1 | 1 | 0 | 0 |
| NM_015937 | 1 | 0 | 1 | 1 | 0 | 0 |
| NM_015938 | 1 | 0 | 1 | 1 | 1 | 1 |
| NM_015939 | 1 | 1 | 1 | 1 | 0 | 0 |
| NM_015941 | 1 | 1 | 1 | 0 | 0 | 1 |
| NM_015942 | 1 | 0 | 1 | 1 | 1 | 1 |
| NM_015944 | 1 | 0 | 1 | 0 | 0 | 0 |
| NM_015945 | 1 | 0 | 1 | 0 | 0 | 0 |
| NM_015946 | 1 | 1 | 1 | 1 | 1 | 1 |
| NM_015947 | 1 | 1 | 1 | 0 | 0 | 1 |
| NM_015948 | 1 | 0 | 1 | 0 | 0 | 0 |
| NM_015949 | 1 | 0 | 1 | 0 | 0 | 1 |
| NM_015950 | 0 | 0 | 0 | 0 | 0 | 1 |
| NM_015952 | 1 | 1 | 1 | 1 | 0 | 1 |
| NM_015953 | 1 | 1 | 1 | 1 | 0 | 1 |
| NM_015954 | 1 | 0 | 1 | 0 | 0 | 1 |
| NM_015955 | 1 | 1 | 1 | 1 | 0 | 1 |
| NM_015957 | 1 | 1 | 1 | 1 | 0 | 0 |
| NM_015958 | 1 | 0 | 1 | 1 | 0 | 0 |
| NM_015959 | 1 | 0 | 1 | 0 | 0 | 1 |
| NM_015960 | 1 | 0 | 1 | 0 | 1 | 0 |
| NM_015962 | 1 | 0 | 1 | 0 | 0 | 0 |
| NM_015963 | 1 | 0 | 1 | 1 | 0 | 0 |
| NM_015964 | 1 | 1 | 1 | 1 | 0 | 1 |
| NM_015965 | 1 | 1 | 1 | 1 | 0 | 0 |
| NM_015966 | 1 | 0 | 1 | 0 | 0 | 1 |
| NM_015967 | 1 | 1 | 1 | 1 | 1 | 1 |
| NM_015969 | 1 | 1 | 1 | 1 | 0 | 0 |
| NM_015971 | 1 | 1 | 1 | 1 | 0 | 0 |
| NM_015972 | 1 | 1 | 1 | 1 | 0 | 1 |
| NM_015973 | 1 | 1 | 1 | 1 | 0 | 0 |
| NM_015974 | 1 | 1 | 1 | 0 | 0 | 0 |
| NM_015975 | 1 | 0 | 1 | 1 | 0 | 1 |
| NM_015976 | 1 | 0 | 1 | 0 | 0 | 1 |
| NM_015977 | 1 | 0 | 1 | 0 | 0 | 0 |
| NM_015979 | 1 | 1 | 1 | 1 | 0 | 0 |
| NM_015980 | 1 | 1 | 1 | 1 | 1 | 0 |
| NM_015981 | 1 | 0 | 0 | 0 | 0 | 1 |
| NM_015983 | 1 | 0 | 1 | 0 | 0 | 0 |
| NM_015984 | 1 | 0 | 1 | 0 | 0 | 1 |
| NM_015985 | 1 | 1 | 0 | 0 | 0 | 0 |
| NM_015986 | 1 | 1 | 1 | 1 | 0 | 0 |
| NM_015987 | 1 | 1 | 1 | 1 | 1 | 1 |
| NM_015989 | 1 | 0 | 1 | 1 | 0 | 1 |
| NM_015990 | 1 | 1 | 1 | 1 | 0 | 0 |
| NM_015991 | 1 | 1 | 1 | 1 | 0 | 1 |
| NM_015994 | 1 | 1 | 1 | 1 | 0 | 0 |
| NM_015995 | 1 | 0 | 1 | 0 | 0 | 1 |

|           |   |   |   |   |   |   |
|-----------|---|---|---|---|---|---|
| NM_015996 | 1 | 1 | 1 | 1 | 0 | 1 |
| NM_015997 | 1 | 0 | 1 | 0 | 0 | 0 |
| NM_015999 | 1 | 1 | 1 | 1 | 0 | 1 |
| NM_016000 | 1 | 0 | 1 | 0 | 0 | 0 |
| NM_016001 | 1 | 1 | 1 | 1 | 0 | 0 |
| NM_016002 | 1 | 0 | 1 | 0 | 1 | 1 |
| NM_016003 | 1 | 0 | 1 | 0 | 0 | 1 |
| NM_016004 | 1 | 0 | 1 | 0 | 0 | 0 |
| NM_016006 | 1 | 1 | 1 | 1 | 0 | 0 |
| NM_016007 | 1 | 0 | 1 | 1 | 1 | 0 |
| NM_016008 | 1 | 0 | 1 | 0 | 0 | 0 |
| NM_016009 | 1 | 0 | 1 | 1 | 1 | 1 |
| NM_016010 | 1 | 1 | 1 | 1 | 0 | 1 |
| NM_016011 | 1 | 0 | 1 | 0 | 0 | 1 |
| NM_016013 | 1 | 1 | 1 | 1 | 1 | 0 |
| NM_016014 | 1 | 0 | 1 | 0 | 1 | 1 |
| NM_016015 | 1 | 0 | 1 | 1 | 0 | 0 |
| NM_016016 | 1 | 0 | 1 | 1 | 1 | 1 |
| NM_016018 | 1 | 1 | 1 | 1 | 0 | 0 |
| NM_016019 | 1 | 0 | 1 | 1 | 1 | 1 |
| NM_016020 | 1 | 0 | 1 | 1 | 0 | 0 |
| NM_016021 | 1 | 1 | 1 | 1 | 1 | 1 |
| NM_016022 | 1 | 0 | 1 | 0 | 0 | 0 |
| NM_016023 | 1 | 1 | 1 | 0 | 0 | 0 |
| NM_016024 | 1 | 0 | 1 | 0 | 0 | 0 |
| NM_016025 | 1 | 1 | 1 | 1 | 1 | 1 |
| NM_016026 | 1 | 0 | 1 | 0 | 0 | 0 |
| NM_016027 | 1 | 1 | 1 | 1 | 0 | 0 |
| NM_016028 | 1 | 1 | 1 | 1 | 0 | 0 |
| NM_016029 | 1 | 0 | 1 | 0 | 0 | 1 |
| NM_016030 | 1 | 1 | 1 | 1 | 0 | 0 |
| NM_016031 | 1 | 0 | 1 | 0 | 0 | 0 |
| NM_016032 | 1 | 0 | 0 | 0 | 0 | 0 |
| NM_016033 | 1 | 0 | 1 | 1 | 0 | 1 |
| NM_016034 | 1 | 1 | 1 | 1 | 0 | 0 |
| NM_016035 | 1 | 0 | 1 | 1 | 1 | 0 |
| NM_016036 | 1 | 0 | 1 | 0 | 1 | 0 |
| NM_016037 | 1 | 1 | 1 | 1 | 0 | 1 |
| NM_016038 | 1 | 0 | 1 | 1 | 1 | 1 |
| NM_016039 | 1 | 0 | 1 | 0 | 0 | 1 |
| NM_016040 | 1 | 1 | 1 | 1 | 0 | 0 |
| NM_016041 | 1 | 1 | 1 | 1 | 0 | 0 |
| NM_016042 | 1 | 0 | 1 | 1 | 0 | 0 |
| NM_016044 | 1 | 0 | 1 | 1 | 1 | 1 |
| NM_016045 | 1 | 0 | 1 | 0 | 0 | 0 |
| NM_016046 | 0 | 0 | 0 | 0 | 0 | 1 |
| NM_016047 | 1 | 0 | 1 | 1 | 1 | 1 |
| NM_016048 | 1 | 0 | 1 | 1 | 1 | 0 |
| NM_016049 | 1 | 0 | 1 | 0 | 1 | 1 |
| NM_016052 | 1 | 1 | 1 | 1 | 0 | 0 |
| NM_016053 | 1 | 0 | 1 | 0 | 0 | 0 |
| NM_016055 | 1 | 1 | 1 | 1 | 0 | 1 |

|           |   |   |   |   |   |   |
|-----------|---|---|---|---|---|---|
| NM_016056 | 1 | 0 | 1 | 0 | 0 | 0 |
| NM_016057 | 1 | 0 | 1 | 1 | 0 | 0 |
| NM_016058 | 1 | 0 | 1 | 1 | 1 | 1 |
| NM_016059 | 1 | 0 | 1 | 0 | 0 | 0 |
| NM_016060 | 1 | 0 | 0 | 0 | 0 | 0 |
| NM_016061 | 1 | 0 | 1 | 0 | 0 | 0 |
| NM_016062 | 1 | 0 | 1 | 0 | 0 | 1 |
| NM_016063 | 1 | 1 | 1 | 1 | 1 | 1 |
| NM_016064 | 1 | 1 | 1 | 1 | 0 | 1 |
| NM_016065 | 1 | 1 | 1 | 1 | 0 | 0 |
| NM_016066 | 1 | 0 | 1 | 0 | 1 | 1 |
| NM_016068 | 1 | 1 | 1 | 1 | 0 | 1 |
| NM_016069 | 1 | 0 | 1 | 0 | 0 | 0 |
| NM_016070 | 1 | 0 | 1 | 1 | 0 | 1 |
| NM_016072 | 1 | 0 | 1 | 1 | 0 | 0 |
| NM_016073 | 1 | 0 | 1 | 1 | 1 | 1 |
| NM_016074 | 1 | 0 | 1 | 1 | 1 | 1 |
| NM_016075 | 1 | 1 | 1 | 1 | 0 | 1 |
| NM_016076 | 1 | 0 | 1 | 0 | 0 | 1 |
| NM_016077 | 1 | 1 | 1 | 1 | 0 | 0 |
| NM_016078 | 1 | 0 | 1 | 0 | 0 | 1 |
| NM_016080 | 1 | 0 | 1 | 1 | 1 | 1 |
| NM_016081 | 1 | 1 | 1 | 1 | 1 | 1 |
| NM_016082 | 1 | 1 | 1 | 1 | 0 | 1 |
| NM_016083 | 1 | 0 | 1 | 0 | 0 | 0 |
| NM_016084 | 1 | 1 | 1 | 1 | 0 | 0 |
| NM_016085 | 1 | 1 | 1 | 1 | 0 | 1 |
| NM_016086 | 1 | 0 | 1 | 1 | 1 | 0 |
| NM_016087 | 1 | 1 | 1 | 1 | 0 | 0 |
| NM_016089 | 1 | 0 | 1 | 1 | 0 | 0 |
| NM_016090 | 1 | 1 | 1 | 1 | 1 | 1 |
| NM_016091 | 1 | 1 | 1 | 1 | 1 | 1 |
| NM_016093 | 1 | 0 | 1 | 0 | 0 | 1 |
| NM_016094 | 0 | 0 | 1 | 0 | 0 | 0 |
| NM_016095 | 1 | 1 | 1 | 0 | 1 | 1 |
| NM_016096 | 1 | 1 | 1 | 1 | 0 | 1 |
| NM_016097 | 1 | 0 | 1 | 0 | 1 | 1 |
| NM_016098 | 1 | 0 | 1 | 0 | 0 | 0 |
| NM_016099 | 1 | 0 | 1 | 1 | 0 | 1 |
| NM_016100 | 1 | 0 | 1 | 1 | 0 | 0 |
| NM_016101 | 1 | 0 | 1 | 0 | 0 | 0 |
| NM_016102 | 1 | 0 | 1 | 0 | 0 | 0 |
| NM_016103 | 1 | 1 | 1 | 0 | 1 | 1 |
| NM_016104 | 1 | 1 | 1 | 1 | 0 | 1 |
| NM_016105 | 0 | 0 | 0 | 0 | 0 | 1 |
| NM_016108 | 1 | 0 | 1 | 1 | 0 | 0 |
| NM_016111 | 1 | 1 | 1 | 1 | 1 | 0 |
| NM_016112 | 1 | 1 | 1 | 1 | 0 | 1 |
| NM_016113 | 1 | 1 | 1 | 1 | 0 | 0 |
| NM_016114 | 1 | 1 | 1 | 0 | 0 | 1 |
| NM_016115 | 1 | 0 | 1 | 0 | 0 | 0 |
| NM_016116 | 1 | 0 | 1 | 0 | 0 | 0 |

|           |   |   |   |   |   |   |
|-----------|---|---|---|---|---|---|
| NM_016118 | 1 | 1 | 1 | 1 | 1 | 1 |
| NM_016119 | 1 | 0 | 1 | 0 | 1 | 1 |
| NM_016120 | 1 | 0 | 1 | 1 | 0 | 0 |
| NM_016121 | 1 | 1 | 1 | 1 | 0 | 0 |
| NM_016122 | 1 | 0 | 1 | 0 | 0 | 0 |
| NM_016123 | 1 | 1 | 1 | 1 | 0 | 1 |
| NM_016124 | 1 | 1 | 1 | 0 | 0 | 1 |
| NM_016125 | 1 | 0 | 1 | 0 | 0 | 1 |
| NM_016126 | 1 | 0 | 1 | 1 | 0 | 1 |
| NM_016127 | 1 | 0 | 1 | 0 | 1 | 1 |
| NM_016128 | 1 | 0 | 1 | 0 | 0 | 0 |
| NM_016129 | 1 | 0 | 1 | 0 | 1 | 1 |
| NM_016131 | 1 | 0 | 1 | 0 | 1 | 1 |
| NM_016132 | 1 | 0 | 1 | 0 | 0 | 0 |
| NM_016133 | 0 | 0 | 1 | 0 | 0 | 0 |
| NM_016134 | 1 | 1 | 1 | 1 | 0 | 1 |
| NM_016135 | 1 | 0 | 1 | 0 | 1 | 1 |
| NM_016138 | 1 | 0 | 1 | 0 | 0 | 0 |
| NM_016139 | 1 | 0 | 1 | 0 | 1 | 1 |
| NM_016140 | 1 | 1 | 1 | 1 | 0 | 1 |
| NM_016141 | 1 | 1 | 1 | 1 | 0 | 0 |
| NM_016142 | 1 | 0 | 1 | 0 | 0 | 1 |
| NM_016143 | 1 | 1 | 1 | 1 | 0 | 1 |
| NM_016144 | 1 | 0 | 1 | 0 | 0 | 0 |
| NM_016145 | 1 | 0 | 1 | 0 | 0 | 1 |
| NM_016146 | 1 | 0 | 1 | 1 | 0 | 0 |
| NM_016147 | 1 | 0 | 1 | 0 | 0 | 0 |
| NM_016148 | 1 | 1 | 1 | 1 | 0 | 0 |
| NM_016150 | 1 | 1 | 1 | 0 | 0 | 1 |
| NM_016151 | 1 | 1 | 1 | 1 | 0 | 0 |
| NM_016153 | 1 | 1 | 1 | 0 | 0 | 0 |
| NM_016154 | 1 | 0 | 1 | 1 | 0 | 0 |
| NM_016155 | 1 | 0 | 1 | 0 | 0 | 1 |
| NM_016156 | 1 | 0 | 1 | 0 | 0 | 0 |
| NM_016157 | 1 | 0 | 1 | 1 | 0 | 1 |
| NM_016158 | 0 | 0 | 1 | 0 | 0 | 0 |
| NM_016160 | 1 | 1 | 1 | 1 | 0 | 1 |
| NM_016161 | 1 | 0 | 1 | 1 | 0 | 0 |
| NM_016162 | 1 | 0 | 1 | 0 | 0 | 0 |
| NM_016164 | 1 | 0 | 1 | 0 | 1 | 1 |
| NM_016166 | 1 | 0 | 1 | 1 | 0 | 0 |
| NM_016167 | 1 | 1 | 1 | 1 | 0 | 0 |
| NM_016170 | 0 | 0 | 0 | 1 | 0 | 0 |
| NM_016171 | 1 | 0 | 1 | 0 | 0 | 1 |
| NM_016172 | 1 | 1 | 1 | 0 | 0 | 1 |
| NM_016173 | 1 | 1 | 1 | 1 | 0 | 0 |
| NM_016174 | 1 | 1 | 1 | 0 | 0 | 1 |
| NM_016175 | 1 | 1 | 1 | 1 | 0 | 0 |
| NM_016176 | 1 | 0 | 1 | 0 | 0 | 1 |
| NM_016178 | 1 | 0 | 1 | 0 | 0 | 1 |
| NM_016179 | 0 | 0 | 0 | 0 | 0 | 1 |
| NM_016180 | 1 | 1 | 1 | 0 | 0 | 0 |

|           |   |   |   |   |   |   |
|-----------|---|---|---|---|---|---|
| NM_016181 | 1 | 0 | 1 | 0 | 0 | 1 |
| NM_016183 | 1 | 1 | 1 | 1 | 0 | 1 |
| NM_016184 | 1 | 1 | 1 | 0 | 1 | 1 |
| NM_016185 | 1 | 1 | 1 | 1 | 1 | 1 |
| NM_016186 | 1 | 0 | 1 | 0 | 0 | 1 |
| NM_016187 | 0 | 0 | 1 | 0 | 0 | 0 |
| NM_016188 | 1 | 0 | 1 | 1 | 0 | 0 |
| NM_016190 | 1 | 0 | 1 | 1 | 0 | 0 |
| NM_016191 | 1 | 0 | 1 | 0 | 0 | 0 |
| NM_016194 | 1 | 0 | 1 | 0 | 0 | 0 |
| NM_016195 | 1 | 1 | 1 | 1 | 0 | 0 |
| NM_016196 | 1 | 0 | 1 | 1 | 0 | 0 |
| NM_016199 | 1 | 1 | 1 | 1 | 0 | 0 |
| NM_016200 | 1 | 1 | 1 | 1 | 0 | 0 |
| NM_016201 | 1 | 0 | 1 | 1 | 0 | 1 |
| NM_016202 | 1 | 0 | 1 | 1 | 0 | 0 |
| NM_016203 | 1 | 0 | 1 | 0 | 0 | 1 |
| NM_016205 | 1 | 1 | 1 | 1 | 1 | 1 |
| NM_016207 | 1 | 0 | 1 | 1 | 0 | 1 |
| NM_016208 | 1 | 0 | 1 | 0 | 0 | 0 |
| NM_016209 | 1 | 1 | 1 | 1 | 0 | 0 |
| NM_016210 | 1 | 0 | 1 | 1 | 1 | 1 |
| NM_016211 | 1 | 0 | 1 | 0 | 1 | 1 |
| NM_016212 | 1 | 1 | 1 | 1 | 0 | 0 |
| NM_016213 | 1 | 0 | 1 | 0 | 0 | 0 |
| NM_016214 | 1 | 0 | 1 | 0 | 1 | 1 |
| NM_016215 | 1 | 0 | 1 | 1 | 0 | 0 |
| NM_016216 | 1 | 0 | 1 | 1 | 0 | 0 |
| NM_016217 | 1 | 1 | 1 | 1 | 0 | 0 |
| NM_016218 | 1 | 0 | 1 | 0 | 0 | 0 |
| NM_016219 | 1 | 0 | 1 | 1 | 1 | 0 |
| NM_016220 | 1 | 0 | 1 | 0 | 0 | 1 |
| NM_016221 | 1 | 1 | 1 | 1 | 0 | 1 |
| NM_016222 | 1 | 1 | 1 | 1 | 0 | 0 |
| NM_016223 | 1 | 0 | 1 | 0 | 0 | 0 |
| NM_016224 | 1 | 1 | 1 | 1 | 0 | 0 |
| NM_016227 | 1 | 0 | 1 | 0 | 1 | 1 |
| NM_016229 | 1 | 1 | 1 | 0 | 0 | 0 |
| NM_016230 | 1 | 1 | 1 | 1 | 0 | 0 |
| NM_016231 | 1 | 0 | 1 | 0 | 0 | 1 |
| NM_016232 | 1 | 0 | 0 | 1 | 0 | 0 |
| NM_016234 | 1 | 0 | 1 | 0 | 0 | 0 |
| NM_016235 | 1 | 0 | 1 | 1 | 0 | 0 |
| NM_016237 | 1 | 0 | 1 | 0 | 0 | 0 |
| NM_016238 | 1 | 0 | 1 | 0 | 0 | 0 |
| NM_016239 | 1 | 0 | 1 | 0 | 1 | 0 |
| NM_016240 | 1 | 0 | 0 | 0 | 0 | 0 |
| NM_016243 | 1 | 0 | 1 | 1 | 0 | 1 |
| NM_016245 | 1 | 1 | 1 | 1 | 0 | 1 |
| NM_016246 | 1 | 0 | 1 | 0 | 0 | 0 |
| NM_016247 | 1 | 0 | 1 | 0 | 0 | 0 |
| NM_016248 | 1 | 0 | 1 | 0 | 1 | 1 |



|           |   |   |   |   |   |   |
|-----------|---|---|---|---|---|---|
| NM_016249 | 0 | 0 | 0 | 0 | 0 | 1 |
| NM_016250 | 1 | 1 | 1 | 1 | 1 | 1 |
| NM_016252 | 1 | 0 | 1 | 0 | 0 | 1 |
| NM_016255 | 1 | 1 | 1 | 1 | 1 | 1 |
| NM_016256 | 1 | 1 | 1 | 1 | 0 | 0 |
| NM_016257 | 1 | 1 | 1 | 1 | 1 | 1 |
| NM_016258 | 1 | 0 | 1 | 1 | 0 | 0 |
| NM_016260 | 1 | 0 | 1 | 0 | 0 | 0 |
| NM_016261 | 1 | 1 | 1 | 1 | 0 | 0 |
| NM_016262 | 1 | 0 | 1 | 1 | 1 | 1 |
| NM_016263 | 1 | 1 | 1 | 1 | 1 | 0 |
| NM_016265 | 1 | 0 | 1 | 0 | 1 | 1 |
| NM_016267 | 1 | 1 | 1 | 1 | 0 | 0 |
| NM_016269 | 1 | 1 | 1 | 1 | 0 | 1 |
| NM_016270 | 1 | 1 | 1 | 1 | 1 | 1 |
| NM_016271 | 1 | 0 | 1 | 0 | 0 | 0 |
| NM_016272 | 1 | 0 | 1 | 0 | 0 | 1 |
| NM_016274 | 1 | 0 | 1 | 0 | 0 | 1 |
| NM_016275 | 1 | 0 | 1 | 0 | 0 | 1 |
| NM_016276 | 1 | 0 | 1 | 0 | 0 | 0 |
| NM_016277 | 1 | 0 | 1 | 0 | 0 | 0 |
| NM_016279 | 1 | 0 | 1 | 0 | 0 | 0 |
| NM_016280 | 1 | 0 | 1 | 0 | 0 | 0 |
| NM_016281 | 1 | 0 | 0 | 0 | 0 | 0 |
| NM_016282 | 1 | 0 | 1 | 0 | 0 | 0 |
| NM_016283 | 1 | 0 | 1 | 1 | 0 | 1 |
| NM_016284 | 1 | 0 | 1 | 0 | 0 | 0 |
| NM_016285 | 1 | 0 | 1 | 1 | 0 | 0 |
| NM_016286 | 1 | 0 | 1 | 1 | 0 | 0 |
| NM_016287 | 1 | 0 | 1 | 0 | 0 | 0 |
| NM_016289 | 1 | 1 | 1 | 1 | 0 | 1 |
| NM_016290 | 1 | 0 | 1 | 1 | 0 | 0 |
| NM_016291 | 1 | 0 | 1 | 1 | 0 | 0 |
| NM_016292 | 1 | 1 | 1 | 1 | 0 | 1 |
| NM_016294 | 1 | 0 | 1 | 0 | 0 | 1 |
| NM_016295 | 1 | 0 | 1 | 1 | 0 | 0 |
| NM_016297 | 1 | 0 | 1 | 0 | 0 | 0 |
| NM_016299 | 1 | 0 | 1 | 0 | 1 | 1 |
| NM_016300 | 0 | 0 | 1 | 0 | 0 | 0 |
| NM_016301 | 1 | 1 | 1 | 1 | 1 | 1 |
| NM_016302 | 1 | 0 | 1 | 1 | 0 | 0 |
| NM_016303 | 1 | 1 | 1 | 1 | 0 | 0 |
| NM_016304 | 1 | 0 | 1 | 1 | 0 | 0 |
| NM_016305 | 1 | 0 | 1 | 0 | 0 | 0 |
| NM_016306 | 1 | 1 | 1 | 1 | 0 | 1 |
| NM_016308 | 1 | 0 | 1 | 1 | 1 | 0 |
| NM_016310 | 1 | 0 | 1 | 0 | 0 | 0 |
| NM_016311 | 1 | 0 | 1 | 1 | 0 | 1 |
| NM_016312 | 1 | 0 | 1 | 0 | 1 | 1 |
| NM_016316 | 1 | 0 | 1 | 0 | 1 | 0 |
| NM_016318 | 1 | 0 | 1 | 0 | 0 | 0 |
| NM_016319 | 1 | 0 | 1 | 0 | 0 | 0 |

|           |   |   |   |   |   |   |
|-----------|---|---|---|---|---|---|
| NM_016320 | 1 | 1 | 1 | 1 | 0 | 0 |
| NM_016321 | 1 | 1 | 1 | 0 | 1 | 1 |
| NM_016322 | 1 | 1 | 1 | 1 | 1 | 1 |
| NM_016323 | 1 | 1 | 1 | 0 | 1 | 1 |
| NM_016324 | 1 | 1 | 1 | 1 | 0 | 0 |
| NM_016325 | 1 | 0 | 1 | 0 | 0 | 0 |
| NM_016326 | 1 | 0 | 1 | 1 | 1 | 1 |
| NM_016327 | 1 | 0 | 1 | 0 | 1 | 0 |
| NM_016329 | 1 | 0 | 1 | 0 | 0 | 0 |
| NM_016331 | 1 | 0 | 1 | 1 | 1 | 0 |
| NM_016332 | 1 | 1 | 1 | 1 | 1 | 1 |
| NM_016333 | 1 | 0 | 1 | 0 | 0 | 0 |
| NM_016334 | 1 | 1 | 1 | 1 | 1 | 1 |
| NM_016335 | 1 | 0 | 1 | 0 | 0 | 0 |
| NM_016336 | 1 | 1 | 1 | 1 | 0 | 0 |
| NM_016337 | 1 | 0 | 1 | 1 | 0 | 1 |
| NM_016338 | 1 | 0 | 1 | 0 | 0 | 1 |
| NM_016339 | 1 | 0 | 1 | 0 | 0 | 1 |
| NM_016340 | 1 | 1 | 1 | 1 | 0 | 1 |
| NM_016341 | 1 | 0 | 1 | 0 | 0 | 0 |
| NM_016343 | 1 | 0 | 1 | 0 | 1 | 1 |
| NM_016346 | 1 | 0 | 1 | 0 | 0 | 0 |
| NM_016347 | 1 | 1 | 1 | 1 | 1 | 1 |
| NM_016348 | 1 | 0 | 1 | 0 | 1 | 1 |
| NM_016349 | 1 | 1 | 1 | 1 | 0 | 0 |
| NM_016350 | 1 | 0 | 1 | 0 | 1 | 1 |
| NM_016351 | 1 | 1 | 1 | 1 | 0 | 1 |
| NM_016353 | 1 | 0 | 1 | 1 | 0 | 0 |
| NM_016354 | 1 | 0 | 1 | 0 | 1 | 1 |
| NM_016355 | 1 | 1 | 1 | 1 | 0 | 0 |
| NM_016357 | 1 | 1 | 1 | 1 | 0 | 1 |
| NM_016359 | 1 | 0 | 1 | 0 | 1 | 1 |
| NM_016360 | 1 | 0 | 1 | 1 | 0 | 0 |
| NM_016361 | 1 | 1 | 1 | 1 | 1 | 0 |
| NM_016362 | 1 | 1 | 1 | 1 | 1 | 1 |
| NM_016363 | 1 | 1 | 1 | 0 | 0 | 0 |
| NM_016364 | 1 | 1 | 1 | 1 | 1 | 1 |
| NM_016365 | 1 | 1 | 1 | 1 | 0 | 0 |
| NM_016368 | 1 | 0 | 1 | 0 | 0 | 0 |
| NM_016369 | 0 | 0 | 0 | 0 | 0 | 1 |
| NM_016370 | 0 | 1 | 1 | 1 | 0 | 0 |
| NM_016371 | 1 | 1 | 1 | 1 | 0 | 1 |
| NM_016372 | 1 | 1 | 1 | 1 | 0 | 1 |
| NM_016374 | 1 | 1 | 1 | 1 | 0 | 0 |
| NM_016376 | 1 | 0 | 1 | 0 | 1 | 1 |
| NM_016377 | 1 | 0 | 1 | 1 | 1 | 1 |
| NM_016378 | 1 | 0 | 1 | 0 | 0 | 0 |
| NM_016379 | 1 | 0 | 1 | 1 | 0 | 0 |
| NM_016382 | 1 | 0 | 1 | 1 | 0 | 0 |
| NM_016387 | 1 | 0 | 1 | 0 | 0 | 1 |
| NM_016388 | 1 | 0 | 1 | 1 | 0 | 1 |
| NM_016390 | 1 | 0 | 1 | 0 | 0 | 0 |

|           |   |   |   |   |   |   |
|-----------|---|---|---|---|---|---|
| NM_016391 | 1 | 1 | 1 | 1 | 0 | 1 |
| NM_016395 | 1 | 0 | 1 | 0 | 0 | 0 |
| NM_016396 | 1 | 0 | 1 | 0 | 0 | 0 |
| NM_016397 | 1 | 1 | 1 | 1 | 0 | 1 |
| NM_016399 | 1 | 1 | 1 | 1 | 0 | 0 |
| NM_016400 | 1 | 1 | 1 | 1 | 1 | 1 |
| NM_016401 | 1 | 0 | 1 | 0 | 0 | 1 |
| NM_016402 | 1 | 1 | 1 | 1 | 0 | 1 |
| NM_016403 | 1 | 0 | 1 | 0 | 0 | 0 |
| NM_016404 | 1 | 0 | 1 | 0 | 0 | 0 |
| NM_016405 | 1 | 1 | 1 | 1 | 1 | 1 |
| NM_016406 | 1 | 0 | 1 | 1 | 0 | 1 |
| NM_016407 | 1 | 0 | 1 | 1 | 0 | 1 |
| NM_016410 | 1 | 1 | 1 | 1 | 0 | 0 |
| NM_016411 | 1 | 0 | 1 | 0 | 0 | 1 |
| NM_016412 | 1 | 0 | 1 | 0 | 0 | 0 |
| NM_016413 | 0 | 1 | 0 | 1 | 0 | 0 |
| NM_016417 | 1 | 1 | 1 | 1 | 0 | 0 |
| NM_016422 | 1 | 1 | 1 | 1 | 0 | 1 |
| NM_016423 | 1 | 1 | 1 | 1 | 0 | 1 |
| NM_016424 | 1 | 0 | 1 | 1 | 0 | 0 |
| NM_016425 | 1 | 0 | 1 | 1 | 0 | 1 |
| NM_016426 | 1 | 0 | 1 | 0 | 0 | 0 |
| NM_016428 | 1 | 0 | 1 | 1 | 0 | 0 |
| NM_016429 | 1 | 0 | 1 | 0 | 0 | 0 |
| NM_016431 | 1 | 0 | 1 | 1 | 1 | 1 |
| NM_016433 | 1 | 0 | 1 | 1 | 1 | 0 |
| NM_016434 | 1 | 0 | 1 | 1 | 0 | 0 |
| NM_016436 | 1 | 0 | 1 | 1 | 0 | 0 |
| NM_016437 | 1 | 1 | 1 | 1 | 1 | 0 |
| NM_016438 | 1 | 1 | 1 | 1 | 0 | 0 |
| NM_016440 | 1 | 1 | 1 | 1 | 0 | 0 |
| NM_016441 | 1 | 1 | 1 | 1 | 1 | 0 |
| NM_016442 | 1 | 0 | 1 | 0 | 0 | 1 |
| NM_016444 | 1 | 1 | 1 | 1 | 1 | 1 |
| NM_016445 | 1 | 0 | 1 | 0 | 0 | 0 |
| NM_016446 | 1 | 1 | 1 | 1 | 1 | 1 |
| NM_016447 | 1 | 1 | 1 | 1 | 0 | 0 |
| NM_016448 | 1 | 0 | 1 | 0 | 1 | 1 |
| NM_016449 | 0 | 0 | 1 | 0 | 0 | 0 |
| NM_016451 | 1 | 0 | 1 | 0 | 0 | 0 |
| NM_016452 | 1 | 0 | 0 | 0 | 0 | 0 |
| NM_016453 | 1 | 0 | 1 | 1 | 1 | 0 |
| NM_016454 | 1 | 0 | 1 | 0 | 0 | 0 |
| NM_016456 | 1 | 0 | 1 | 1 | 1 | 1 |
| NM_016457 | 1 | 1 | 1 | 1 | 0 | 0 |
| NM_016458 | 0 | 0 | 1 | 1 | 0 | 0 |
| NM_016459 | 1 | 0 | 1 | 0 | 0 | 1 |
| NM_016462 | 1 | 0 | 1 | 0 | 0 | 0 |
| NM_016463 | 1 | 0 | 1 | 0 | 0 | 0 |
| NM_016464 | 0 | 0 | 1 | 0 | 0 | 0 |
| NM_016466 | 1 | 0 | 1 | 0 | 0 | 0 |

|           |   |   |   |   |   |   |
|-----------|---|---|---|---|---|---|
| NM_016467 | 1 | 0 | 1 | 1 | 0 | 0 |
| NM_016468 | 1 | 0 | 1 | 1 | 0 | 1 |
| NM_016470 | 1 | 1 | 1 | 1 | 0 | 1 |
| NM_016471 | 1 | 0 | 1 | 0 | 0 | 1 |
| NM_016472 | 1 | 0 | 1 | 0 | 0 | 1 |
| NM_016474 | 1 | 0 | 1 | 1 | 0 | 0 |
| NM_016475 | 1 | 0 | 1 | 0 | 0 | 1 |
| NM_016476 | 1 | 1 | 1 | 1 | 1 | 1 |
| NM_016477 | 1 | 1 | 1 | 1 | 1 | 1 |
| NM_016478 | 1 | 1 | 1 | 1 | 0 | 1 |
| NM_016479 | 1 | 0 | 0 | 0 | 0 | 0 |
| NM_016480 | 1 | 1 | 1 | 1 | 0 | 0 |
| NM_016481 | 1 | 0 | 1 | 0 | 0 | 0 |
| NM_016484 | 1 | 0 | 1 | 0 | 0 | 0 |
| NM_016485 | 1 | 0 | 1 | 0 | 0 | 0 |
| NM_016486 | 1 | 1 | 1 | 1 | 0 | 0 |
| NM_016487 | 1 | 0 | 1 | 1 | 0 | 0 |
| NM_016488 | 1 | 0 | 1 | 0 | 0 | 0 |
| NM_016489 | 1 | 1 | 1 | 1 | 0 | 1 |
| NM_016490 | 1 | 0 | 1 | 0 | 0 | 0 |
| NM_016491 | 1 | 1 | 1 | 1 | 0 | 0 |
| NM_016494 | 1 | 0 | 1 | 0 | 0 | 0 |
| NM_016495 | 1 | 1 | 1 | 1 | 0 | 0 |
| NM_016496 | 1 | 0 | 1 | 0 | 0 | 0 |
| NM_016497 | 1 | 0 | 1 | 0 | 0 | 1 |
| NM_016498 | 1 | 1 | 1 | 1 | 0 | 0 |
| NM_016499 | 1 | 0 | 1 | 0 | 0 | 0 |
| NM_016500 | 1 | 0 | 1 | 1 | 0 | 1 |
| NM_016501 | 1 | 0 | 1 | 0 | 0 | 0 |
| NM_016503 | 1 | 1 | 1 | 1 | 0 | 0 |
| NM_016504 | 1 | 0 | 1 | 0 | 0 | 0 |
| NM_016505 | 1 | 0 | 1 | 0 | 1 | 0 |
| NM_016506 | 1 | 0 | 1 | 0 | 0 | 0 |
| NM_016507 | 1 | 1 | 1 | 0 | 1 | 1 |
| NM_016508 | 1 | 0 | 1 | 0 | 0 | 1 |
| NM_016509 | 1 | 0 | 1 | 0 | 0 | 0 |
| NM_016510 | 1 | 0 | 1 | 1 | 0 | 0 |
| NM_016511 | 1 | 1 | 1 | 1 | 1 | 1 |
| NM_016516 | 1 | 1 | 1 | 1 | 0 | 0 |
| NM_016518 | 1 | 0 | 0 | 0 | 0 | 1 |
| NM_016519 | 1 | 1 | 1 | 1 | 0 | 0 |
| NM_016520 | 1 | 0 | 1 | 1 | 0 | 0 |
| NM_016521 | 1 | 0 | 1 | 1 | 0 | 1 |
| NM_016523 | 1 | 0 | 1 | 0 | 0 | 0 |
| NM_016524 | 1 | 0 | 1 | 0 | 0 | 1 |
| NM_016525 | 1 | 1 | 1 | 1 | 1 | 1 |
| NM_016526 | 1 | 0 | 1 | 1 | 1 | 1 |
| NM_016527 | 0 | 0 | 0 | 0 | 0 | 1 |
| NM_016528 | 1 | 0 | 1 | 0 | 0 | 0 |
| NM_016529 | 0 | 0 | 1 | 0 | 0 | 0 |
| NM_016530 | 1 | 0 | 1 | 1 | 1 | 1 |
| NM_016531 | 1 | 0 | 1 | 1 | 1 | 1 |

|           |   |   |   |   |   |   |
|-----------|---|---|---|---|---|---|
| NM_016532 | 1 | 1 | 1 | 1 | 1 | 0 |
| NM_016533 | 1 | 1 | 1 | 1 | 1 | 1 |
| NM_016534 | 1 | 0 | 1 | 1 | 0 | 0 |
| NM_016535 | 1 | 0 | 1 | 0 | 0 | 0 |
| NM_016536 | 1 | 0 | 1 | 1 | 1 | 1 |
| NM_016538 | 1 | 0 | 1 | 1 | 1 | 1 |
| NM_016539 | 1 | 0 | 1 | 0 | 0 | 0 |
| NM_016540 | 1 | 0 | 1 | 1 | 0 | 1 |
| NM_016541 | 1 | 0 | 1 | 0 | 0 | 0 |
| NM_016542 | 1 | 0 | 1 | 0 | 0 | 0 |
| NM_016543 | 1 | 1 | 1 | 1 | 0 | 0 |
| NM_016544 | 1 | 0 | 1 | 0 | 0 | 0 |
| NM_016545 | 1 | 0 | 1 | 0 | 1 | 1 |
| NM_016546 | 1 | 0 | 1 | 1 | 0 | 0 |
| NM_016547 | 1 | 0 | 1 | 0 | 0 | 1 |
| NM_016548 | 1 | 1 | 1 | 1 | 0 | 1 |
| NM_016550 | 1 | 0 | 1 | 0 | 0 | 0 |
| NM_016551 | 1 | 0 | 1 | 1 | 0 | 1 |
| NM_016552 | 1 | 0 | 1 | 1 | 0 | 0 |
| NM_016553 | 1 | 1 | 1 | 1 | 0 | 0 |
| NM_016556 | 1 | 1 | 1 | 0 | 0 | 1 |
| NM_016558 | 1 | 0 | 1 | 1 | 0 | 0 |
| NM_016561 | 1 | 0 | 1 | 0 | 1 | 0 |
| NM_016562 | 1 | 0 | 1 | 1 | 0 | 0 |
| NM_016563 | 0 | 0 | 0 | 0 | 0 | 1 |
| NM_016565 | 1 | 1 | 1 | 1 | 0 | 1 |
| NM_016567 | 1 | 1 | 1 | 1 | 0 | 0 |
| NM_016568 | 1 | 0 | 1 | 0 | 0 | 0 |
| NM_016569 | 0 | 0 | 0 | 0 | 0 | 1 |
| NM_016570 | 1 | 1 | 1 | 1 | 0 | 0 |
| NM_016571 | 1 | 1 | 1 | 1 | 0 | 1 |
| NM_016572 | 1 | 0 | 1 | 0 | 0 | 0 |
| NM_016573 | 1 | 0 | 1 | 1 | 1 | 1 |
| NM_016575 | 1 | 0 | 1 | 0 | 0 | 1 |
| NM_016576 | 1 | 0 | 1 | 1 | 1 | 1 |
| NM_016577 | 1 | 0 | 1 | 0 | 0 | 1 |
| NM_016578 | 1 | 1 | 1 | 1 | 0 | 0 |
| NM_016579 | 1 | 0 | 1 | 0 | 0 | 0 |
| NM_016580 | 1 | 0 | 1 | 1 | 0 | 0 |
| NM_016581 | 1 | 1 | 1 | 1 | 0 | 1 |
| NM_016582 | 1 | 0 | 1 | 1 | 1 | 1 |
| NM_016584 | 1 | 0 | 1 | 1 | 1 | 1 |
| NM_016585 | 1 | 0 | 1 | 0 | 1 | 0 |
| NM_016586 | 1 | 0 | 1 | 0 | 1 | 1 |
| NM_016587 | 1 | 0 | 1 | 1 | 0 | 0 |
| NM_016588 | 1 | 0 | 1 | 0 | 0 | 1 |
| NM_016589 | 1 | 1 | 1 | 1 | 0 | 1 |
| NM_016590 | 1 | 0 | 1 | 1 | 0 | 0 |
| NM_016591 | 0 | 0 | 0 | 0 | 0 | 1 |
| NM_016592 | 1 | 1 | 1 | 1 | 0 | 0 |
| NM_016594 | 1 | 1 | 1 | 1 | 1 | 1 |
| NM_016596 | 1 | 1 | 1 | 1 | 0 | 0 |

|           |   |   |   |   |   |   |
|-----------|---|---|---|---|---|---|
| NM_016598 | 1 | 0 | 1 | 0 | 1 | 1 |
| NM_016599 | 0 | 0 | 1 | 0 | 0 | 0 |
| NM_016601 | 1 | 1 | 1 | 1 | 0 | 1 |
| NM_016602 | 1 | 1 | 1 | 1 | 1 | 1 |
| NM_016603 | 1 | 0 | 1 | 0 | 0 | 1 |
| NM_016604 | 1 | 0 | 1 | 0 | 0 | 1 |
| NM_016605 | 1 | 1 | 1 | 1 | 0 | 0 |
| NM_016606 | 1 | 0 | 0 | 0 | 0 | 1 |
| NM_016607 | 1 | 0 | 1 | 1 | 0 | 0 |
| NM_016608 | 1 | 1 | 1 | 1 | 0 | 1 |
| NM_016609 | 1 | 1 | 1 | 1 | 0 | 1 |
| NM_016610 | 1 | 0 | 1 | 1 | 1 | 1 |
| NM_016611 | 1 | 0 | 1 | 0 | 0 | 0 |
| NM_016613 | 1 | 1 | 1 | 1 | 1 | 1 |
| NM_016614 | 1 | 1 | 1 | 1 | 0 | 1 |
| NM_016615 | 1 | 1 | 1 | 1 | 0 | 0 |
| NM_016616 | 1 | 1 | 1 | 1 | 0 | 0 |
| NM_016617 | 1 | 1 | 1 | 1 | 0 | 1 |
| NM_016618 | 1 | 0 | 1 | 0 | 0 | 1 |
| NM_016619 | 1 | 1 | 1 | 1 | 0 | 1 |
| NM_016620 | 1 | 0 | 1 | 0 | 0 | 0 |
| NM_016621 | 1 | 1 | 1 | 1 | 0 | 0 |
| NM_016622 | 1 | 1 | 1 | 1 | 0 | 1 |
| NM_016623 | 1 | 1 | 1 | 1 | 1 | 0 |
| NM_016625 | 1 | 0 | 1 | 0 | 0 | 1 |
| NM_016626 | 1 | 0 | 1 | 1 | 1 | 1 |
| NM_016627 | 1 | 0 | 1 | 1 | 1 | 1 |
| NM_016629 | 1 | 1 | 1 | 1 | 1 | 0 |
| NM_016630 | 1 | 1 | 1 | 1 | 0 | 0 |
| NM_016631 | 1 | 0 | 1 | 1 | 0 | 0 |
| NM_016632 | 1 | 0 | 1 | 0 | 0 | 0 |
| NM_016633 | 1 | 0 | 1 | 0 | 0 | 1 |
| NM_016638 | 1 | 1 | 1 | 1 | 0 | 0 |
| NM_016639 | 1 | 0 | 1 | 1 | 1 | 1 |
| NM_016640 | 1 | 1 | 1 | 1 | 0 | 0 |
| NM_016641 | 1 | 1 | 1 | 1 | 0 | 1 |
| NM_016642 | 1 | 0 | 1 | 0 | 0 | 1 |
| NM_016644 | 1 | 1 | 1 | 1 | 0 | 1 |
| NM_016645 | 1 | 0 | 1 | 0 | 1 | 1 |
| NM_016646 | 1 | 0 | 0 | 0 | 0 | 1 |
| NM_016647 | 1 | 0 | 1 | 1 | 0 | 1 |
| NM_016648 | 1 | 0 | 1 | 0 | 0 | 0 |
| NM_016649 | 1 | 0 | 1 | 1 | 0 | 0 |
| NM_016650 | 1 | 1 | 1 | 1 | 0 | 1 |
| NM_016651 | 1 | 0 | 1 | 0 | 0 | 1 |
| NM_016652 | 1 | 1 | 1 | 1 | 0 | 1 |
| NM_016653 | 1 | 1 | 1 | 1 | 0 | 0 |
| NM_016654 | 1 | 0 | 1 | 0 | 0 | 0 |
| NM_016730 | 1 | 1 | 1 | 1 | 0 | 0 |
| NM_016733 | 1 | 1 | 1 | 1 | 1 | 1 |
| NM_016734 | 1 | 1 | 0 | 0 | 0 | 0 |
| NM_016735 | 1 | 0 | 1 | 0 | 1 | 0 |

|           |   |   |   |   |   |   |
|-----------|---|---|---|---|---|---|
| NM_016815 | 1 | 1 | 1 | 1 | 0 | 1 |
| NM_016816 | 1 | 0 | 1 | 0 | 1 | 1 |
| NM_016817 | 1 | 0 | 1 | 0 | 0 | 0 |
| NM_016818 | 1 | 1 | 1 | 1 | 1 | 1 |
| NM_016820 | 1 | 1 | 1 | 0 | 0 | 0 |
| NM_016821 | 1 | 0 | 1 | 1 | 0 | 0 |
| NM_016824 | 1 | 0 | 1 | 1 | 0 | 1 |
| NM_016826 | 1 | 0 | 1 | 1 | 0 | 0 |
| NM_016827 | 1 | 0 | 1 | 1 | 0 | 0 |
| NM_016828 | 1 | 0 | 1 | 1 | 0 | 0 |
| NM_016829 | 1 | 0 | 1 | 1 | 0 | 0 |
| NM_016830 | 1 | 0 | 1 | 0 | 0 | 0 |
| NM_016831 | 1 | 1 | 1 | 1 | 0 | 0 |
| NM_016835 | 1 | 1 | 1 | 1 | 0 | 1 |
| NM_016836 | 1 | 0 | 1 | 0 | 1 | 1 |
| NM_016839 | 1 | 0 | 1 | 0 | 1 | 1 |
| NM_016848 | 0 | 1 | 0 | 1 | 0 | 0 |
| NM_016929 | 1 | 1 | 1 | 1 | 0 | 1 |
| NM_016930 | 1 | 0 | 1 | 1 | 1 | 1 |
| NM_016931 | 0 | 0 | 1 | 0 | 0 | 0 |
| NM_016932 | 0 | 0 | 0 | 0 | 0 | 1 |
| NM_016936 | 1 | 1 | 1 | 1 | 1 | 1 |
| NM_016937 | 1 | 0 | 1 | 1 | 0 | 0 |
| NM_016938 | 1 | 0 | 1 | 0 | 0 | 0 |
| NM_016940 | 1 | 1 | 1 | 0 | 1 | 1 |
| NM_016941 | 0 | 0 | 0 | 0 | 0 | 1 |
| NM_016942 | 1 | 0 | 1 | 0 | 0 | 0 |
| NM_016943 | 0 | 0 | 0 | 0 | 0 | 1 |
| NM_016944 | 1 | 0 | 0 | 0 | 0 | 0 |
| NM_016945 | 1 | 0 | 1 | 0 | 0 | 0 |
| NM_016946 | 1 | 1 | 1 | 1 | 1 | 1 |
| NM_016947 | 1 | 0 | 1 | 1 | 1 | 1 |
| NM_016948 | 1 | 1 | 1 | 1 | 0 | 0 |
| NM_016950 | 1 | 0 | 1 | 0 | 0 | 0 |
| NM_016951 | 1 | 1 | 1 | 1 | 1 | 1 |
| NM_016952 | 1 | 0 | 1 | 0 | 0 | 0 |
| NM_016955 | 1 | 0 | 1 | 0 | 1 | 1 |
| NM_017409 | 0 | 0 | 0 | 1 | 0 | 0 |
| NM_017410 | 1 | 1 | 1 | 0 | 0 | 0 |
| NM_017411 | 1 | 1 | 1 | 1 | 1 | 0 |
| NM_017412 | 1 | 0 | 1 | 0 | 1 | 0 |
| NM_017413 | 1 | 1 | 1 | 1 | 1 | 1 |
| NM_017414 | 1 | 1 | 1 | 0 | 0 | 0 |
| NM_017415 | 1 | 1 | 1 | 1 | 1 | 1 |
| NM_017416 | 1 | 0 | 0 | 0 | 0 | 0 |
| NM_017417 | 0 | 0 | 1 | 0 | 0 | 1 |
| NM_017420 | 1 | 0 | 1 | 0 | 0 | 0 |
| NM_017421 | 1 | 0 | 1 | 1 | 1 | 1 |
| NM_017423 | 1 | 0 | 1 | 0 | 0 | 1 |
| NM_017425 | 1 | 1 | 1 | 1 | 1 | 1 |
| NM_017426 | 1 | 0 | 1 | 1 | 1 | 1 |
| NM_017429 | 0 | 0 | 0 | 0 | 0 | 1 |

|           |   |   |   |   |   |   |
|-----------|---|---|---|---|---|---|
| NM_017432 | 1 | 0 | 1 | 1 | 0 | 0 |
| NM_017433 | 1 | 1 | 1 | 0 | 0 | 0 |
| NM_017436 | 1 | 0 | 1 | 0 | 0 | 0 |
| NM_017438 | 1 | 0 | 1 | 1 | 1 | 1 |
| NM_017440 | 1 | 0 | 1 | 0 | 0 | 0 |
| NM_017442 | 1 | 0 | 0 | 0 | 0 | 1 |
| NM_017443 | 1 | 0 | 1 | 0 | 0 | 0 |
| NM_017445 | 1 | 1 | 1 | 1 | 0 | 1 |
| NM_017446 | 1 | 0 | 1 | 1 | 0 | 1 |
| NM_017447 | 1 | 0 | 1 | 0 | 0 | 0 |
| NM_017449 | 1 | 1 | 1 | 1 | 0 | 0 |
| NM_017450 | 1 | 1 | 1 | 1 | 0 | 1 |
| NM_017451 | 1 | 1 | 1 | 1 | 0 | 0 |
| NM_017452 | 1 | 1 | 1 | 1 | 0 | 0 |
| NM_017455 | 1 | 1 | 1 | 1 | 1 | 1 |
| NM_017456 | 1 | 0 | 1 | 0 | 0 | 0 |
| NM_017458 | 1 | 0 | 1 | 1 | 1 | 1 |
| NM_017459 | 1 | 1 | 0 | 0 | 0 | 0 |
| NM_017460 | 1 | 0 | 1 | 1 | 0 | 0 |
| NM_017483 | 1 | 1 | 1 | 1 | 0 | 0 |
| NM_017484 | 0 | 0 | 0 | 0 | 0 | 1 |
| NM_017488 | 1 | 0 | 1 | 0 | 0 | 0 |
| NM_017491 | 1 | 0 | 1 | 0 | 0 | 0 |
| NM_017492 | 1 | 0 | 1 | 0 | 0 | 0 |
| NM_017493 | 1 | 0 | 1 | 0 | 0 | 0 |
| NM_017495 | 1 | 1 | 1 | 1 | 0 | 0 |
| NM_017503 | 1 | 1 | 1 | 1 | 0 | 0 |
| NM_017506 | 1 | 0 | 1 | 0 | 0 | 0 |
| NM_017509 | 1 | 1 | 1 | 1 | 0 | 0 |
| NM_017510 | 1 | 1 | 1 | 1 | 0 | 0 |
| NM_017512 | 1 | 1 | 1 | 0 | 1 | 1 |
| NM_017513 | 0 | 0 | 0 | 1 | 0 | 0 |
| NM_017514 | 1 | 0 | 1 | 1 | 0 | 0 |
| NM_017515 | 1 | 0 | 1 | 1 | 0 | 0 |
| NM_017518 | 1 | 1 | 1 | 1 | 0 | 0 |
| NM_017521 | 1 | 0 | 0 | 0 | 1 | 0 |
| NM_017522 | 1 | 0 | 1 | 1 | 0 | 0 |
| NM_017523 | 1 | 1 | 1 | 0 | 0 | 0 |
| NM_017526 | 1 | 0 | 1 | 1 | 0 | 0 |
| NM_017528 | 1 | 1 | 1 | 1 | 0 | 1 |
| NM_017532 | 1 | 0 | 1 | 1 | 1 | 0 |
| NM_017534 | 1 | 1 | 0 | 0 | 0 | 0 |
| NM_017535 | 1 | 0 | 1 | 0 | 1 | 1 |
| NM_017539 | 1 | 0 | 1 | 0 | 0 | 1 |
| NM_017540 | 1 | 0 | 1 | 1 | 1 | 1 |
| NM_017541 | 1 | 1 | 1 | 1 | 1 | 1 |
| NM_017542 | 1 | 0 | 1 | 0 | 0 | 0 |
| NM_017544 | 1 | 0 | 1 | 1 | 1 | 1 |
| NM_017546 | 1 | 1 | 1 | 1 | 0 | 0 |
| NM_017547 | 1 | 0 | 1 | 1 | 1 | 1 |
| NM_017548 | 0 | 0 | 1 | 0 | 1 | 0 |
| NM_017549 | 1 | 0 | 1 | 0 | 0 | 0 |



|           |   |   |   |   |   |   |
|-----------|---|---|---|---|---|---|
| NM_017555 | 1 | 0 | 1 | 1 | 0 | 1 |
| NM_017556 | 1 | 0 | 1 | 1 | 0 | 0 |
| NM_017559 | 1 | 0 | 1 | 1 | 0 | 0 |
| NM_017564 | 1 | 1 | 1 | 1 | 0 | 0 |
| NM_017565 | 1 | 1 | 1 | 1 | 0 | 1 |
| NM_017566 | 1 | 0 | 1 | 1 | 0 | 0 |
| NM_017567 | 1 | 1 | 1 | 1 | 1 | 1 |
| NM_017569 | 1 | 1 | 1 | 1 | 0 | 0 |
| NM_017571 | 1 | 1 | 1 | 1 | 0 | 1 |
| NM_017572 | 1 | 1 | 1 | 1 | 0 | 1 |
| NM_017573 | 1 | 0 | 1 | 1 | 1 | 1 |
| NM_017574 | 1 | 1 | 1 | 1 | 0 | 1 |
| NM_017575 | 1 | 1 | 1 | 1 | 0 | 0 |
| NM_017576 | 1 | 1 | 1 | 1 | 0 | 0 |
| NM_017577 | 1 | 1 | 1 | 1 | 1 | 1 |
| NM_017579 | 1 | 0 | 0 | 0 | 0 | 0 |
| NM_017580 | 1 | 1 | 1 | 0 | 0 | 1 |
| NM_017581 | 1 | 0 | 1 | 0 | 0 | 0 |
| NM_017582 | 1 | 0 | 1 | 0 | 0 | 0 |
| NM_017583 | 1 | 0 | 1 | 1 | 0 | 0 |
| NM_017584 | 1 | 1 | 1 | 1 | 0 | 0 |
| NM_017585 | 1 | 0 | 1 | 1 | 0 | 0 |
| NM_017586 | 1 | 1 | 1 | 1 | 0 | 1 |
| NM_017588 | 1 | 0 | 1 | 0 | 1 | 1 |
| NM_017590 | 1 | 0 | 1 | 0 | 0 | 0 |
| NM_017593 | 1 | 0 | 1 | 1 | 0 | 1 |
| NM_017594 | 1 | 1 | 1 | 0 | 0 | 1 |
| NM_017595 | 1 | 0 | 1 | 1 | 0 | 0 |
| NM_017596 | 1 | 1 | 1 | 1 | 1 | 0 |
| NM_017597 | 1 | 0 | 1 | 0 | 0 | 0 |
| NM_017599 | 1 | 0 | 1 | 1 | 0 | 0 |
| NM_017600 | 1 | 0 | 1 | 0 | 0 | 0 |
| NM_017602 | 1 | 1 | 1 | 1 | 0 | 0 |
| NM_017606 | 1 | 1 | 1 | 1 | 0 | 0 |
| NM_017607 | 1 | 0 | 1 | 0 | 0 | 0 |
| NM_017609 | 0 | 1 | 0 | 0 | 0 | 1 |
| NM_017610 | 1 | 0 | 1 | 1 | 0 | 1 |
| NM_017611 | 1 | 1 | 1 | 1 | 1 | 1 |
| NM_017612 | 1 | 0 | 1 | 1 | 0 | 0 |
| NM_017613 | 1 | 0 | 1 | 0 | 0 | 1 |
| NM_017615 | 1 | 0 | 1 | 1 | 1 | 1 |
| NM_017617 | 1 | 1 | 1 | 1 | 1 | 1 |
| NM_017621 | 1 | 0 | 1 | 1 | 0 | 0 |
| NM_017622 | 1 | 0 | 1 | 0 | 0 | 0 |
| NM_017623 | 1 | 0 | 1 | 0 | 0 | 0 |
| NM_017624 | 1 | 0 | 1 | 0 | 0 | 0 |
| NM_017625 | 1 | 1 | 1 | 1 | 0 | 1 |
| NM_017626 | 1 | 0 | 1 | 0 | 1 | 0 |
| NM_017628 | 1 | 0 | 1 | 0 | 1 | 1 |
| NM_017629 | 1 | 0 | 1 | 1 | 1 | 1 |
| NM_017630 | 1 | 0 | 1 | 0 | 0 | 1 |
| NM_017631 | 1 | 1 | 1 | 0 | 0 | 1 |

|           |   |   |   |   |   |   |
|-----------|---|---|---|---|---|---|
| NM_017632 | 1 | 0 | 1 | 1 | 0 | 1 |
| NM_017633 | 1 | 1 | 1 | 1 | 1 | 1 |
| NM_017634 | 1 | 1 | 1 | 1 | 0 | 1 |
| NM_017635 | 1 | 0 | 1 | 1 | 0 | 0 |
| NM_017636 | 1 | 0 | 1 | 0 | 0 | 0 |
| NM_017637 | 1 | 0 | 1 | 0 | 0 | 0 |
| NM_017638 | 1 | 1 | 1 | 0 | 0 | 0 |
| NM_017639 | 1 | 0 | 0 | 0 | 0 | 0 |
| NM_017640 | 1 | 1 | 1 | 1 | 1 | 1 |
| NM_017644 | 1 | 0 | 1 | 0 | 0 | 0 |
| NM_017645 | 1 | 0 | 1 | 0 | 1 | 1 |
| NM_017646 | 1 | 1 | 1 | 1 | 1 | 0 |
| NM_017647 | 1 | 1 | 1 | 1 | 0 | 1 |
| NM_017651 | 1 | 1 | 1 | 1 | 1 | 1 |
| NM_017652 | 1 | 1 | 1 | 1 | 1 | 1 |
| NM_017653 | 1 | 1 | 1 | 0 | 0 | 0 |
| NM_017654 | 1 | 1 | 1 | 1 | 1 | 1 |
| NM_017655 | 1 | 0 | 1 | 0 | 0 | 0 |
| NM_017656 | 1 | 1 | 1 | 0 | 1 | 0 |
| NM_017657 | 1 | 1 | 1 | 1 | 0 | 1 |
| NM_017658 | 1 | 0 | 1 | 0 | 0 | 0 |
| NM_017659 | 1 | 0 | 1 | 0 | 0 | 0 |
| NM_017660 | 1 | 0 | 1 | 0 | 0 | 0 |
| NM_017661 | 1 | 0 | 1 | 0 | 0 | 0 |
| NM_017662 | 1 | 1 | 1 | 1 | 1 | 1 |
| NM_017664 | 1 | 0 | 1 | 0 | 1 | 1 |
| NM_017665 | 1 | 0 | 1 | 0 | 1 | 1 |
| NM_017666 | 1 | 0 | 1 | 0 | 0 | 0 |
| NM_017668 | 1 | 1 | 1 | 1 | 0 | 0 |
| NM_017669 | 1 | 0 | 1 | 0 | 0 | 1 |
| NM_017670 | 1 | 0 | 1 | 1 | 0 | 0 |
| NM_017671 | 1 | 1 | 1 | 0 | 0 | 0 |
| NM_017672 | 1 | 1 | 1 | 1 | 0 | 0 |
| NM_017673 | 1 | 1 | 1 | 1 | 0 | 0 |
| NM_017674 | 0 | 0 | 1 | 0 | 0 | 0 |
| NM_017675 | 0 | 0 | 1 | 0 | 0 | 0 |
| NM_017676 | 1 | 0 | 1 | 1 | 0 | 0 |
| NM_017677 | 1 | 0 | 1 | 0 | 0 | 0 |
| NM_017678 | 0 | 0 | 0 | 0 | 0 | 1 |
| NM_017679 | 1 | 0 | 1 | 1 | 0 | 1 |
| NM_017680 | 0 | 0 | 0 | 0 | 0 | 1 |
| NM_017681 | 1 | 0 | 1 | 0 | 0 | 0 |
| NM_017682 | 1 | 1 | 1 | 0 | 0 | 1 |
| NM_017684 | 1 | 0 | 1 | 0 | 1 | 0 |
| NM_017685 | 1 | 0 | 1 | 0 | 0 | 0 |
| NM_017686 | 1 | 0 | 1 | 1 | 0 | 0 |
| NM_017687 | 1 | 0 | 1 | 0 | 1 | 1 |
| NM_017688 | 1 | 1 | 1 | 1 | 0 | 1 |
| NM_017689 | 1 | 0 | 0 | 0 | 0 | 1 |
| NM_017690 | 1 | 0 | 1 | 1 | 0 | 1 |
| NM_017691 | 1 | 1 | 1 | 0 | 0 | 0 |
| NM_017693 | 1 | 0 | 1 | 1 | 0 | 0 |

|           |   |   |   |   |   |   |
|-----------|---|---|---|---|---|---|
| NM_017694 | 1 | 0 | 1 | 1 | 0 | 1 |
| NM_017696 | 1 | 0 | 1 | 0 | 0 | 0 |
| NM_017699 | 1 | 0 | 1 | 0 | 1 | 1 |
| NM_017700 | 1 | 0 | 1 | 0 | 1 | 0 |
| NM_017702 | 1 | 1 | 1 | 1 | 1 | 1 |
| NM_017703 | 1 | 1 | 1 | 1 | 0 | 1 |
| NM_017704 | 1 | 0 | 1 | 0 | 1 | 0 |
| NM_017705 | 1 | 1 | 1 | 1 | 0 | 1 |
| NM_017706 | 1 | 0 | 1 | 0 | 0 | 0 |
| NM_017707 | 1 | 1 | 1 | 1 | 0 | 1 |
| NM_017708 | 1 | 1 | 1 | 1 | 0 | 0 |
| NM_017709 | 1 | 0 | 1 | 0 | 0 | 1 |
| NM_017712 | 1 | 1 | 1 | 0 | 0 | 1 |
| NM_017713 | 0 | 0 | 1 | 0 | 0 | 0 |
| NM_017714 | 1 | 0 | 1 | 1 | 1 | 1 |
| NM_017715 | 1 | 0 | 1 | 1 | 0 | 0 |
| NM_017716 | 0 | 0 | 0 | 0 | 0 | 1 |
| NM_017717 | 1 | 0 | 1 | 1 | 0 | 0 |
| NM_017718 | 1 | 1 | 1 | 1 | 0 | 1 |
| NM_017719 | 1 | 1 | 1 | 1 | 0 | 0 |
| NM_017720 | 1 | 1 | 1 | 1 | 0 | 1 |
| NM_017721 | 1 | 0 | 1 | 1 | 0 | 0 |
| NM_017722 | 1 | 1 | 1 | 1 | 0 | 0 |
| NM_017723 | 1 | 1 | 1 | 1 | 0 | 0 |
| NM_017724 | 1 | 0 | 1 | 0 | 0 | 1 |
| NM_017726 | 0 | 0 | 0 | 0 | 0 | 1 |
| NM_017727 | 1 | 1 | 1 | 1 | 0 | 0 |
| NM_017728 | 1 | 0 | 1 | 1 | 0 | 0 |
| NM_017729 | 1 | 0 | 1 | 0 | 0 | 1 |
| NM_017730 | 1 | 1 | 1 | 1 | 0 | 0 |
| NM_017731 | 1 | 0 | 1 | 1 | 1 | 1 |
| NM_017732 | 1 | 0 | 1 | 1 | 1 | 1 |
| NM_017733 | 1 | 0 | 1 | 0 | 1 | 1 |
| NM_017734 | 0 | 1 | 1 | 0 | 0 | 0 |
| NM_017735 | 1 | 0 | 1 | 1 | 0 | 0 |
| NM_017737 | 1 | 0 | 1 | 0 | 1 | 1 |
| NM_017738 | 1 | 0 | 1 | 0 | 0 | 1 |
| NM_017739 | 1 | 1 | 1 | 1 | 1 | 1 |
| NM_017740 | 1 | 0 | 1 | 0 | 0 | 0 |
| NM_017741 | 1 | 0 | 1 | 0 | 0 | 1 |
| NM_017742 | 1 | 0 | 1 | 0 | 1 | 1 |
| NM_017743 | 1 | 0 | 1 | 0 | 0 | 0 |
| NM_017744 | 1 | 1 | 1 | 1 | 0 | 0 |
| NM_017745 | 1 | 0 | 1 | 0 | 0 | 1 |
| NM_017746 | 1 | 1 | 1 | 1 | 0 | 1 |
| NM_017748 | 1 | 1 | 1 | 1 | 0 | 0 |
| NM_017749 | 1 | 0 | 1 | 1 | 0 | 0 |
| NM_017750 | 1 | 0 | 1 | 0 | 0 | 0 |
| NM_017751 | 1 | 1 | 1 | 1 | 0 | 0 |
| NM_017752 | 1 | 0 | 1 | 1 | 0 | 1 |
| NM_017754 | 1 | 0 | 0 | 0 | 0 | 0 |
| NM_017755 | 1 | 1 | 1 | 1 | 0 | 0 |

|           |   |   |   |   |   |   |
|-----------|---|---|---|---|---|---|
| NM_017756 | 1 | 0 | 1 | 0 | 0 | 0 |
| NM_017757 | 1 | 1 | 1 | 0 | 0 | 1 |
| NM_017758 | 1 | 0 | 1 | 0 | 0 | 0 |
| NM_017759 | 1 | 0 | 0 | 0 | 0 | 0 |
| NM_017760 | 1 | 0 | 1 | 0 | 0 | 1 |
| NM_017761 | 1 | 0 | 1 | 0 | 0 | 0 |
| NM_017762 | 1 | 0 | 1 | 0 | 0 | 0 |
| NM_017763 | 1 | 1 | 1 | 0 | 0 | 0 |
| NM_017765 | 1 | 0 | 1 | 0 | 0 | 1 |
| NM_017766 | 1 | 0 | 1 | 1 | 1 | 0 |
| NM_017767 | 1 | 1 | 1 | 0 | 0 | 0 |
| NM_017768 | 1 | 0 | 1 | 0 | 1 | 1 |
| NM_017769 | 1 | 0 | 1 | 0 | 1 | 0 |
| NM_017771 | 1 | 1 | 1 | 1 | 0 | 0 |
| NM_017772 | 1 | 1 | 1 | 1 | 1 | 1 |
| NM_017773 | 1 | 1 | 1 | 0 | 0 | 0 |
| NM_017774 | 1 | 1 | 1 | 1 | 0 | 0 |
| NM_017775 | 1 | 0 | 1 | 1 | 0 | 0 |
| NM_017776 | 1 | 0 | 1 | 1 | 0 | 0 |
| NM_017777 | 1 | 0 | 1 | 1 | 1 | 1 |
| NM_017778 | 1 | 0 | 1 | 0 | 0 | 1 |
| NM_017779 | 1 | 0 | 1 | 0 | 0 | 1 |
| NM_017780 | 1 | 1 | 1 | 1 | 1 | 1 |
| NM_017781 | 1 | 0 | 1 | 1 | 0 | 0 |
| NM_017782 | 1 | 0 | 1 | 0 | 0 | 0 |
| NM_017784 | 1 | 1 | 1 | 1 | 1 | 1 |
| NM_017785 | 1 | 0 | 1 | 1 | 0 | 1 |
| NM_017786 | 1 | 1 | 1 | 1 | 1 | 0 |
| NM_017787 | 1 | 0 | 1 | 0 | 0 | 1 |
| NM_017789 | 1 | 0 | 1 | 1 | 1 | 1 |
| NM_017790 | 1 | 0 | 1 | 1 | 0 | 0 |
| NM_017791 | 1 | 1 | 1 | 1 | 0 | 0 |
| NM_017792 | 1 | 1 | 1 | 1 | 0 | 0 |
| NM_017793 | 1 | 0 | 0 | 0 | 0 | 1 |
| NM_017794 | 1 | 1 | 1 | 1 | 0 | 0 |
| NM_017797 | 1 | 1 | 1 | 1 | 0 | 0 |
| NM_017798 | 1 | 1 | 1 | 1 | 1 | 1 |
| NM_017799 | 1 | 0 | 1 | 1 | 0 | 1 |
| NM_017801 | 1 | 1 | 1 | 1 | 1 | 1 |
| NM_017802 | 1 | 0 | 1 | 0 | 0 | 0 |
| NM_017803 | 1 | 0 | 1 | 0 | 0 | 0 |
| NM_017804 | 1 | 0 | 1 | 0 | 0 | 0 |
| NM_017805 | 1 | 0 | 1 | 0 | 0 | 1 |
| NM_017806 | 1 | 0 | 1 | 1 | 0 | 0 |
| NM_017807 | 1 | 1 | 1 | 1 | 0 | 0 |
| NM_017808 | 1 | 0 | 1 | 1 | 0 | 0 |
| NM_017809 | 1 | 0 | 1 | 1 | 0 | 0 |
| NM_017810 | 1 | 1 | 1 | 0 | 0 | 0 |
| NM_017811 | 1 | 1 | 1 | 1 | 0 | 1 |
| NM_017812 | 1 | 0 | 1 | 0 | 0 | 0 |
| NM_017813 | 1 | 1 | 1 | 1 | 0 | 1 |
| NM_017814 | 1 | 0 | 1 | 1 | 1 | 1 |

|           |   |   |   |   |   |   |
|-----------|---|---|---|---|---|---|
| NM_017815 | 1 | 0 | 1 | 1 | 0 | 0 |
| NM_017816 | 1 | 0 | 1 | 1 | 0 | 1 |
| NM_017817 | 1 | 1 | 1 | 1 | 0 | 0 |
| NM_017818 | 1 | 1 | 1 | 0 | 0 | 1 |
| NM_017819 | 1 | 0 | 1 | 1 | 0 | 1 |
| NM_017820 | 1 | 1 | 1 | 1 | 1 | 1 |
| NM_017822 | 1 | 0 | 1 | 0 | 1 | 1 |
| NM_017823 | 1 | 1 | 1 | 1 | 1 | 0 |
| NM_017824 | 1 | 0 | 1 | 0 | 1 | 1 |
| NM_017825 | 1 | 1 | 1 | 1 | 0 | 1 |
| NM_017827 | 1 | 0 | 1 | 1 | 0 | 0 |
| NM_017829 | 1 | 1 | 1 | 1 | 0 | 1 |
| NM_017830 | 1 | 0 | 1 | 0 | 0 | 0 |
| NM_017831 | 1 | 0 | 1 | 0 | 0 | 1 |
| NM_017832 | 1 | 0 | 1 | 0 | 0 | 0 |
| NM_017833 | 1 | 1 | 1 | 0 | 0 | 1 |
| NM_017834 | 1 | 0 | 1 | 1 | 0 | 0 |
| NM_017835 | 1 | 1 | 1 | 1 | 0 | 1 |
| NM_017836 | 1 | 1 | 1 | 1 | 1 | 1 |
| NM_017837 | 1 | 0 | 1 | 1 | 0 | 0 |
| NM_017838 | 1 | 1 | 1 | 1 | 0 | 1 |
| NM_017839 | 1 | 0 | 1 | 0 | 1 | 1 |
| NM_017840 | 1 | 1 | 1 | 1 | 0 | 1 |
| NM_017841 | 1 | 0 | 1 | 0 | 0 | 0 |
| NM_017842 | 1 | 1 | 1 | 1 | 1 | 1 |
| NM_017843 | 1 | 1 | 1 | 1 | 0 | 1 |
| NM_017845 | 1 | 0 | 1 | 0 | 0 | 0 |
| NM_017846 | 1 | 0 | 1 | 1 | 1 | 1 |
| NM_017847 | 1 | 0 | 1 | 0 | 1 | 0 |
| NM_017848 | 1 | 0 | 1 | 0 | 0 | 0 |
| NM_017849 | 1 | 0 | 1 | 1 | 0 | 1 |
| NM_017850 | 1 | 0 | 1 | 1 | 0 | 0 |
| NM_017851 | 1 | 1 | 1 | 1 | 0 | 0 |
| NM_017852 | 1 | 0 | 1 | 0 | 0 | 0 |
| NM_017853 | 1 | 0 | 1 | 0 | 0 | 0 |
| NM_017854 | 1 | 0 | 1 | 0 | 0 | 1 |
| NM_017856 | 1 | 0 | 1 | 0 | 0 | 0 |
| NM_017857 | 1 | 1 | 1 | 1 | 1 | 1 |
| NM_017858 | 1 | 0 | 1 | 1 | 1 | 1 |
| NM_017859 | 1 | 1 | 1 | 1 | 0 | 0 |
| NM_017860 | 1 | 0 | 1 | 1 | 0 | 0 |
| NM_017861 | 1 | 0 | 1 | 1 | 0 | 1 |
| NM_017863 | 1 | 1 | 1 | 1 | 0 | 0 |
| NM_017864 | 1 | 0 | 1 | 0 | 1 | 0 |
| NM_017865 | 1 | 0 | 1 | 0 | 0 | 0 |
| NM_017866 | 1 | 0 | 1 | 0 | 0 | 1 |
| NM_017867 | 1 | 0 | 1 | 0 | 0 | 0 |
| NM_017868 | 1 | 1 | 1 | 1 | 1 | 1 |
| NM_017869 | 1 | 1 | 1 | 1 | 0 | 0 |
| NM_017871 | 1 | 0 | 1 | 1 | 1 | 1 |
| NM_017872 | 1 | 0 | 1 | 1 | 0 | 0 |
| NM_017873 | 1 | 0 | 1 | 1 | 1 | 0 |

|           |   |   |   |   |   |   |
|-----------|---|---|---|---|---|---|
| NM_017874 | 1 | 1 | 1 | 1 | 1 | 1 |
| NM_017875 | 1 | 1 | 1 | 1 | 0 | 0 |
| NM_017876 | 1 | 1 | 1 | 1 | 0 | 0 |
| NM_017877 | 1 | 0 | 1 | 0 | 0 | 0 |
| NM_017878 | 1 | 1 | 1 | 0 | 1 | 1 |
| NM_017880 | 1 | 0 | 1 | 0 | 0 | 0 |
| NM_017881 | 1 | 0 | 1 | 1 | 0 | 0 |
| NM_017882 | 1 | 1 | 1 | 1 | 0 | 0 |
| NM_017883 | 1 | 0 | 1 | 0 | 0 | 0 |
| NM_017884 | 1 | 0 | 1 | 0 | 0 | 1 |
| NM_017885 | 1 | 0 | 1 | 1 | 1 | 1 |
| NM_017886 | 0 | 0 | 1 | 0 | 0 | 0 |
| NM_017887 | 1 | 0 | 1 | 0 | 1 | 0 |
| NM_017888 | 1 | 0 | 1 | 0 | 0 | 1 |
| NM_017890 | 1 | 0 | 1 | 0 | 0 | 0 |
| NM_017891 | 1 | 1 | 1 | 1 | 1 | 1 |
| NM_017892 | 1 | 0 | 1 | 0 | 0 | 0 |
| NM_017894 | 1 | 1 | 1 | 0 | 1 | 0 |
| NM_017895 | 1 | 0 | 1 | 0 | 0 | 0 |
| NM_017896 | 1 | 0 | 1 | 0 | 0 | 0 |
| NM_017897 | 1 | 1 | 1 | 1 | 1 | 1 |
| NM_017898 | 1 | 1 | 1 | 0 | 0 | 1 |
| NM_017899 | 1 | 1 | 1 | 1 | 0 | 1 |
| NM_017900 | 1 | 0 | 1 | 0 | 0 | 0 |
| NM_017901 | 1 | 1 | 1 | 1 | 0 | 0 |
| NM_017902 | 1 | 0 | 1 | 1 | 0 | 0 |
| NM_017903 | 1 | 0 | 1 | 0 | 0 | 0 |
| NM_017904 | 1 | 1 | 1 | 1 | 0 | 0 |
| NM_017905 | 1 | 0 | 1 | 0 | 0 | 1 |
| NM_017906 | 1 | 1 | 1 | 1 | 0 | 0 |
| NM_017907 | 1 | 1 | 1 | 1 | 0 | 1 |
| NM_017908 | 1 | 1 | 1 | 1 | 0 | 0 |
| NM_017909 | 1 | 1 | 1 | 1 | 0 | 0 |
| NM_017910 | 1 | 0 | 1 | 1 | 0 | 0 |
| NM_017911 | 1 | 0 | 1 | 0 | 0 | 0 |
| NM_017912 | 1 | 1 | 1 | 0 | 1 | 1 |
| NM_017913 | 1 | 0 | 1 | 1 | 0 | 0 |
| NM_017914 | 1 | 1 | 1 | 1 | 0 | 1 |
| NM_017915 | 1 | 1 | 1 | 0 | 0 | 0 |
| NM_017916 | 1 | 1 | 1 | 1 | 0 | 1 |
| NM_017917 | 1 | 1 | 1 | 1 | 0 | 1 |
| NM_017918 | 1 | 0 | 1 | 1 | 0 | 1 |
| NM_017919 | 1 | 1 | 1 | 0 | 0 | 0 |
| NM_017920 | 1 | 0 | 0 | 0 | 0 | 1 |
| NM_017921 | 1 | 1 | 1 | 1 | 0 | 1 |
| NM_017922 | 1 | 1 | 1 | 1 | 0 | 0 |
| NM_017923 | 1 | 1 | 1 | 1 | 1 | 0 |
| NM_017924 | 1 | 0 | 1 | 0 | 0 | 1 |
| NM_017925 | 1 | 0 | 1 | 0 | 0 | 0 |
| NM_017928 | 1 | 0 | 0 | 0 | 0 | 1 |
| NM_017929 | 1 | 1 | 1 | 0 | 0 | 1 |
| NM_017931 | 1 | 0 | 1 | 1 | 1 | 1 |

|           |   |   |   |   |   |   |
|-----------|---|---|---|---|---|---|
| NM_017933 | 1 | 1 | 1 | 1 | 0 | 1 |
| NM_017934 | 1 | 1 | 1 | 1 | 0 | 1 |
| NM_017935 | 1 | 0 | 1 | 1 | 1 | 0 |
| NM_017936 | 1 | 0 | 1 | 1 | 0 | 0 |
| NM_017937 | 1 | 0 | 1 | 1 | 0 | 0 |
| NM_017938 | 1 | 0 | 1 | 0 | 0 | 1 |
| NM_017939 | 1 | 0 | 1 | 0 | 0 | 1 |
| NM_017940 | 1 | 0 | 1 | 0 | 0 | 0 |
| NM_017941 | 1 | 0 | 1 | 0 | 0 | 0 |
| NM_017942 | 1 | 0 | 1 | 0 | 0 | 1 |
| NM_017943 | 1 | 0 | 1 | 0 | 1 | 0 |
| NM_017944 | 1 | 0 | 1 | 1 | 0 | 0 |
| NM_017945 | 1 | 1 | 1 | 0 | 0 | 1 |
| NM_017946 | 1 | 0 | 1 | 0 | 0 | 0 |
| NM_017947 | 0 | 1 | 0 | 1 | 0 | 0 |
| NM_017948 | 1 | 0 | 1 | 1 | 1 | 1 |
| NM_017949 | 1 | 1 | 1 | 0 | 1 | 1 |
| NM_017950 | 0 | 0 | 1 | 0 | 0 | 0 |
| NM_017951 | 1 | 1 | 1 | 1 | 0 | 0 |
| NM_017952 | 1 | 0 | 1 | 1 | 1 | 1 |
| NM_017953 | 1 | 1 | 1 | 1 | 1 | 1 |
| NM_017954 | 1 | 0 | 1 | 0 | 0 | 0 |
| NM_017955 | 1 | 0 | 1 | 1 | 0 | 1 |
| NM_017956 | 1 | 0 | 1 | 1 | 0 | 1 |
| NM_017957 | 1 | 0 | 1 | 0 | 0 | 0 |
| NM_017958 | 1 | 0 | 1 | 0 | 0 | 0 |
| NM_017959 | 0 | 0 | 0 | 0 | 0 | 1 |
| NM_017960 | 0 | 0 | 1 | 0 | 0 | 0 |
| NM_017961 | 1 | 0 | 1 | 0 | 0 | 0 |
| NM_017963 | 1 | 1 | 1 | 1 | 0 | 1 |
| NM_017964 | 1 | 0 | 1 | 0 | 0 | 0 |
| NM_017965 | 1 | 1 | 1 | 1 | 0 | 0 |
| NM_017966 | 1 | 0 | 1 | 0 | 1 | 1 |
| NM_017967 | 1 | 1 | 1 | 1 | 0 | 0 |
| NM_017969 | 1 | 0 | 1 | 1 | 0 | 1 |
| NM_017970 | 1 | 0 | 1 | 1 | 0 | 0 |
| NM_017971 | 1 | 1 | 1 | 1 | 0 | 0 |
| NM_017972 | 1 | 0 | 1 | 0 | 0 | 0 |
| NM_017974 | 1 | 0 | 1 | 0 | 0 | 1 |
| NM_017975 | 1 | 0 | 1 | 0 | 1 | 1 |
| NM_017976 | 1 | 0 | 1 | 1 | 0 | 0 |
| NM_017977 | 1 | 1 | 1 | 1 | 0 | 0 |
| NM_017979 | 1 | 0 | 1 | 0 | 0 | 0 |
| NM_017980 | 1 | 0 | 1 | 0 | 0 | 1 |
| NM_017982 | 1 | 0 | 1 | 0 | 0 | 1 |
| NM_017983 | 1 | 0 | 1 | 1 | 0 | 1 |
| NM_017984 | 1 | 0 | 1 | 1 | 1 | 0 |
| NM_017985 | 0 | 0 | 1 | 0 | 0 | 0 |
| NM_017986 | 1 | 0 | 1 | 0 | 0 | 1 |
| NM_017987 | 1 | 0 | 1 | 0 | 0 | 0 |
| NM_017988 | 1 | 1 | 1 | 1 | 0 | 0 |
| NM_017990 | 1 | 0 | 1 | 0 | 1 | 1 |

|           |   |   |   |   |   |   |
|-----------|---|---|---|---|---|---|
| NM_017991 | 1 | 1 | 1 | 1 | 1 | 1 |
| NM_017992 | 1 | 0 | 1 | 1 | 0 | 0 |
| NM_017994 | 1 | 0 | 1 | 0 | 0 | 0 |
| NM_017996 | 1 | 1 | 1 | 1 | 0 | 0 |
| NM_017998 | 1 | 1 | 1 | 1 | 1 | 1 |
| NM_017999 | 1 | 0 | 1 | 0 | 0 | 0 |
| NM_018000 | 1 | 0 | 1 | 1 | 0 | 1 |
| NM_018001 | 1 | 0 | 1 | 0 | 0 | 0 |
| NM_018003 | 1 | 1 | 1 | 1 | 0 | 0 |
| NM_018004 | 1 | 0 | 1 | 1 | 0 | 1 |
| NM_018005 | 1 | 0 | 1 | 0 | 0 | 1 |
| NM_018006 | 1 | 0 | 1 | 1 | 0 | 0 |
| NM_018009 | 1 | 0 | 1 | 0 | 0 | 0 |
| NM_018010 | 1 | 0 | 1 | 1 | 1 | 1 |
| NM_018011 | 1 | 1 | 1 | 1 | 0 | 0 |
| NM_018013 | 1 | 0 | 1 | 0 | 1 | 1 |
| NM_018015 | 1 | 0 | 1 | 1 | 1 | 1 |
| NM_018017 | 1 | 0 | 1 | 1 | 0 | 0 |
| NM_018018 | 0 | 0 | 0 | 0 | 0 | 1 |
| NM_018019 | 1 | 0 | 1 | 0 | 0 | 0 |
| NM_018022 | 1 | 1 | 1 | 1 | 1 | 1 |
| NM_018023 | 1 | 1 | 1 | 0 | 0 | 0 |
| NM_018024 | 1 | 0 | 1 | 1 | 1 | 1 |
| NM_018025 | 1 | 0 | 1 | 0 | 1 | 1 |
| NM_018026 | 1 | 0 | 1 | 0 | 0 | 0 |
| NM_018027 | 1 | 0 | 1 | 1 | 0 | 0 |
| NM_018029 | 1 | 0 | 1 | 0 | 0 | 0 |
| NM_018031 | 1 | 1 | 1 | 1 | 0 | 0 |
| NM_018032 | 1 | 1 | 1 | 1 | 0 | 1 |
| NM_018033 | 1 | 0 | 1 | 0 | 0 | 1 |
| NM_018034 | 1 | 0 | 1 | 0 | 0 | 0 |
| NM_018035 | 1 | 1 | 1 | 1 | 0 | 1 |
| NM_018036 | 1 | 1 | 1 | 1 | 1 | 1 |
| NM_018037 | 1 | 0 | 1 | 1 | 0 | 1 |
| NM_018038 | 1 | 0 | 1 | 0 | 0 | 0 |
| NM_018039 | 1 | 0 | 0 | 0 | 0 | 0 |
| NM_018040 | 1 | 0 | 1 | 1 | 0 | 0 |
| NM_018042 | 1 | 0 | 1 | 0 | 0 | 0 |
| NM_018043 | 0 | 0 | 0 | 0 | 0 | 1 |
| NM_018044 | 1 | 1 | 1 | 1 | 1 | 1 |
| NM_018045 | 1 | 0 | 1 | 0 | 0 | 0 |
| NM_018046 | 1 | 0 | 1 | 0 | 0 | 0 |
| NM_018047 | 1 | 1 | 1 | 1 | 0 | 0 |
| NM_018048 | 1 | 0 | 1 | 1 | 1 | 1 |
| NM_018049 | 1 | 0 | 1 | 1 | 0 | 0 |
| NM_018050 | 1 | 1 | 1 | 1 | 1 | 1 |
| NM_018051 | 1 | 1 | 1 | 1 | 1 | 1 |
| NM_018052 | 1 | 0 | 1 | 1 | 0 | 0 |
| NM_018053 | 1 | 1 | 1 | 1 | 0 | 1 |
| NM_018054 | 1 | 1 | 1 | 1 | 0 | 1 |
| NM_018055 | 1 | 0 | 1 | 0 | 0 | 0 |
| NM_018056 | 1 | 0 | 1 | 1 | 0 | 0 |



|           |   |   |   |   |   |   |
|-----------|---|---|---|---|---|---|
| NM_018058 | 1 | 0 | 1 | 0 | 1 | 1 |
| NM_018059 | 1 | 1 | 1 | 0 | 0 | 1 |
| NM_018060 | 1 | 0 | 1 | 1 | 0 | 0 |
| NM_018061 | 1 | 0 | 1 | 0 | 0 | 0 |
| NM_018062 | 1 | 0 | 1 | 0 | 0 | 1 |
| NM_018063 | 1 | 1 | 1 | 0 | 0 | 1 |
| NM_018064 | 1 | 0 | 1 | 1 | 1 | 1 |
| NM_018065 | 1 | 0 | 1 | 1 | 0 | 0 |
| NM_018066 | 1 | 0 | 1 | 0 | 0 | 0 |
| NM_018067 | 1 | 0 | 1 | 1 | 1 | 1 |
| NM_018070 | 1 | 1 | 1 | 0 | 0 | 0 |
| NM_018071 | 1 | 1 | 1 | 1 | 0 | 1 |
| NM_018072 | 1 | 1 | 1 | 1 | 0 | 0 |
| NM_018073 | 1 | 0 | 1 | 1 | 0 | 0 |
| NM_018074 | 1 | 0 | 1 | 1 | 0 | 0 |
| NM_018075 | 1 | 0 | 1 | 1 | 0 | 0 |
| NM_018077 | 1 | 1 | 1 | 1 | 0 | 0 |
| NM_018078 | 1 | 1 | 1 | 0 | 0 | 0 |
| NM_018079 | 1 | 1 | 1 | 1 | 0 | 0 |
| NM_018080 | 1 | 1 | 1 | 1 | 0 | 0 |
| NM_018081 | 1 | 0 | 1 | 0 | 0 | 0 |
| NM_018082 | 1 | 0 | 1 | 0 | 0 | 0 |
| NM_018083 | 1 | 0 | 1 | 0 | 0 | 1 |
| NM_018084 | 1 | 1 | 1 | 1 | 0 | 1 |
| NM_018085 | 1 | 1 | 1 | 1 | 0 | 0 |
| NM_018087 | 1 | 1 | 1 | 1 | 0 | 1 |
| NM_018088 | 1 | 1 | 1 | 1 | 1 | 1 |
| NM_018089 | 1 | 0 | 1 | 1 | 1 | 0 |
| NM_018090 | 1 | 1 | 1 | 1 | 0 | 0 |
| NM_018091 | 1 | 0 | 1 | 1 | 0 | 1 |
| NM_018092 | 1 | 1 | 1 | 1 | 0 | 1 |
| NM_018093 | 1 | 1 | 1 | 1 | 0 | 1 |
| NM_018094 | 1 | 1 | 1 | 1 | 1 | 1 |
| NM_018096 | 1 | 1 | 1 | 1 | 0 | 0 |
| NM_018097 | 1 | 0 | 1 | 0 | 0 | 1 |
| NM_018098 | 1 | 1 | 1 | 1 | 0 | 0 |
| NM_018099 | 1 | 1 | 1 | 1 | 1 | 1 |
| NM_018100 | 1 | 0 | 1 | 0 | 1 | 1 |
| NM_018101 | 1 | 1 | 1 | 1 | 0 | 0 |
| NM_018102 | 1 | 1 | 1 | 0 | 0 | 0 |
| NM_018103 | 1 | 1 | 1 | 1 | 0 | 0 |
| NM_018105 | 1 | 1 | 1 | 1 | 0 | 0 |
| NM_018106 | 1 | 0 | 1 | 0 | 0 | 0 |
| NM_018107 | 1 | 1 | 1 | 1 | 1 | 1 |
| NM_018108 | 1 | 0 | 1 | 0 | 0 | 1 |
| NM_018109 | 1 | 0 | 1 | 1 | 0 | 0 |
| NM_018110 | 1 | 1 | 1 | 1 | 0 | 1 |
| NM_018111 | 1 | 1 | 1 | 1 | 0 | 0 |
| NM_018112 | 1 | 1 | 1 | 1 | 0 | 1 |
| NM_018113 | 1 | 0 | 1 | 0 | 0 | 0 |
| NM_018114 | 1 | 0 | 1 | 0 | 0 | 1 |
| NM_018115 | 1 | 0 | 1 | 0 | 0 | 0 |

|           |   |   |   |   |   |   |
|-----------|---|---|---|---|---|---|
| NM_018116 | 1 | 1 | 1 | 1 | 0 | 1 |
| NM_018117 | 1 | 1 | 1 | 1 | 1 | 1 |
| NM_018118 | 1 | 1 | 1 | 1 | 0 | 0 |
| NM_018119 | 1 | 1 | 1 | 1 | 1 | 1 |
| NM_018120 | 1 | 0 | 1 | 0 | 0 | 1 |
| NM_018121 | 1 | 0 | 1 | 0 | 0 | 0 |
| NM_018122 | 1 | 0 | 1 | 0 | 0 | 0 |
| NM_018124 | 1 | 0 | 1 | 0 | 0 | 0 |
| NM_018125 | 1 | 1 | 1 | 1 | 1 | 1 |
| NM_018126 | 1 | 1 | 1 | 1 | 1 | 1 |
| NM_018127 | 1 | 1 | 1 | 1 | 1 | 1 |
| NM_018128 | 1 | 1 | 1 | 1 | 1 | 1 |
| NM_018129 | 1 | 1 | 1 | 1 | 0 | 0 |
| NM_018130 | 1 | 0 | 1 | 1 | 0 | 0 |
| NM_018131 | 1 | 0 | 1 | 0 | 1 | 1 |
| NM_018132 | 1 | 0 | 1 | 0 | 0 | 0 |
| NM_018133 | 1 | 0 | 1 | 0 | 0 | 0 |
| NM_018134 | 1 | 0 | 1 | 1 | 0 | 0 |
| NM_018135 | 1 | 0 | 1 | 0 | 0 | 0 |
| NM_018136 | 1 | 1 | 1 | 0 | 1 | 1 |
| NM_018137 | 1 | 0 | 1 | 1 | 0 | 0 |
| NM_018138 | 1 | 1 | 1 | 1 | 0 | 1 |
| NM_018139 | 1 | 1 | 1 | 1 | 0 | 0 |
| NM_018140 | 1 | 0 | 1 | 1 | 1 | 1 |
| NM_018141 | 1 | 0 | 1 | 0 | 1 | 0 |
| NM_018142 | 1 | 1 | 1 | 1 | 0 | 1 |
| NM_018144 | 1 | 1 | 1 | 1 | 0 | 0 |
| NM_018145 | 1 | 1 | 1 | 1 | 1 | 0 |
| NM_018146 | 1 | 1 | 1 | 1 | 0 | 1 |
| NM_018147 | 1 | 0 | 1 | 0 | 1 | 1 |
| NM_018148 | 1 | 1 | 1 | 1 | 0 | 1 |
| NM_018149 | 1 | 0 | 1 | 0 | 0 | 0 |
| NM_018150 | 1 | 1 | 1 | 1 | 0 | 0 |
| NM_018152 | 1 | 1 | 1 | 0 | 1 | 1 |
| NM_018153 | 1 | 0 | 1 | 0 | 0 | 0 |
| NM_018154 | 1 | 1 | 1 | 1 | 1 | 1 |
| NM_018155 | 1 | 0 | 1 | 0 | 0 | 0 |
| NM_018156 | 1 | 0 | 1 | 0 | 1 | 1 |
| NM_018157 | 1 | 0 | 1 | 1 | 0 | 0 |
| NM_018158 | 1 | 0 | 1 | 0 | 0 | 0 |
| NM_018159 | 1 | 1 | 1 | 1 | 1 | 1 |
| NM_018161 | 1 | 0 | 1 | 0 | 0 | 0 |
| NM_018162 | 0 | 0 | 1 | 0 | 0 | 1 |
| NM_018163 | 1 | 0 | 1 | 0 | 0 | 0 |
| NM_018164 | 1 | 1 | 1 | 1 | 0 | 0 |
| NM_018165 | 1 | 1 | 1 | 1 | 0 | 0 |
| NM_018166 | 1 | 0 | 1 | 1 | 1 | 1 |
| NM_018167 | 1 | 0 | 1 | 0 | 0 | 0 |
| NM_018168 | 1 | 0 | 0 | 1 | 0 | 0 |
| NM_018169 | 1 | 1 | 1 | 1 | 1 | 1 |
| NM_018170 | 1 | 0 | 1 | 0 | 0 | 0 |
| NM_018171 | 1 | 1 | 1 | 1 | 0 | 0 |

|           |   |   |   |   |   |   |
|-----------|---|---|---|---|---|---|
| NM_018172 | 1 | 1 | 0 | 0 | 0 | 0 |
| NM_018173 | 1 | 1 | 1 | 1 | 1 | 0 |
| NM_018174 | 1 | 0 | 1 | 0 | 0 | 0 |
| NM_018176 | 1 | 1 | 1 | 0 | 0 | 0 |
| NM_018177 | 1 | 1 | 1 | 1 | 0 | 1 |
| NM_018178 | 1 | 0 | 1 | 1 | 0 | 1 |
| NM_018179 | 1 | 1 | 1 | 1 | 0 | 0 |
| NM_018180 | 1 | 1 | 1 | 1 | 1 | 1 |
| NM_018181 | 1 | 0 | 1 | 1 | 0 | 0 |
| NM_018182 | 1 | 0 | 1 | 0 | 1 | 0 |
| NM_018183 | 1 | 0 | 1 | 0 | 0 | 0 |
| NM_018184 | 1 | 0 | 1 | 0 | 0 | 1 |
| NM_018185 | 1 | 1 | 1 | 1 | 0 | 0 |
| NM_018186 | 1 | 0 | 1 | 0 | 1 | 1 |
| NM_018187 | 1 | 0 | 1 | 0 | 0 | 0 |
| NM_018188 | 1 | 1 | 1 | 1 | 0 | 0 |
| NM_018189 | 1 | 1 | 1 | 1 | 1 | 0 |
| NM_018190 | 1 | 0 | 1 | 0 | 0 | 1 |
| NM_018191 | 1 | 0 | 1 | 0 | 0 | 0 |
| NM_018192 | 1 | 1 | 1 | 1 | 0 | 1 |
| NM_018194 | 1 | 0 | 1 | 1 | 0 | 0 |
| NM_018195 | 1 | 0 | 1 | 1 | 1 | 0 |
| NM_018196 | 1 | 1 | 1 | 1 | 0 | 0 |
| NM_018197 | 1 | 1 | 1 | 1 | 0 | 1 |
| NM_018198 | 1 | 1 | 1 | 1 | 0 | 1 |
| NM_018199 | 1 | 0 | 1 | 1 | 0 | 0 |
| NM_018200 | 1 | 0 | 1 | 1 | 1 | 1 |
| NM_018201 | 1 | 1 | 1 | 1 | 1 | 0 |
| NM_018202 | 1 | 1 | 1 | 1 | 0 | 1 |
| NM_018203 | 0 | 0 | 1 | 0 | 0 | 0 |
| NM_018204 | 1 | 0 | 1 | 0 | 0 | 1 |
| NM_018205 | 1 | 0 | 1 | 1 | 1 | 1 |
| NM_018206 | 1 | 1 | 1 | 0 | 1 | 1 |
| NM_018207 | 1 | 0 | 1 | 0 | 0 | 0 |
| NM_018208 | 1 | 1 | 1 | 1 | 0 | 1 |
| NM_018210 | 1 | 0 | 1 | 1 | 1 | 1 |
| NM_018212 | 1 | 0 | 1 | 0 | 0 | 0 |
| NM_018214 | 1 | 0 | 1 | 0 | 0 | 1 |
| NM_018215 | 1 | 0 | 1 | 0 | 0 | 1 |
| NM_018216 | 1 | 1 | 1 | 0 | 1 | 0 |
| NM_018217 | 1 | 0 | 1 | 0 | 1 | 1 |
| NM_018221 | 1 | 0 | 1 | 0 | 1 | 1 |
| NM_018222 | 0 | 0 | 1 | 0 | 1 | 0 |
| NM_018223 | 1 | 0 | 1 | 0 | 0 | 1 |
| NM_018225 | 1 | 0 | 1 | 0 | 0 | 1 |
| NM_018226 | 1 | 0 | 1 | 0 | 0 | 0 |
| NM_018227 | 1 | 1 | 1 | 0 | 0 | 0 |
| NM_018229 | 1 | 0 | 1 | 0 | 0 | 0 |
| NM_018230 | 1 | 0 | 1 | 0 | 0 | 0 |
| NM_018231 | 1 | 1 | 1 | 1 | 0 | 0 |
| NM_018233 | 1 | 0 | 1 | 0 | 0 | 1 |
| NM_018234 | 1 | 1 | 1 | 1 | 1 | 1 |

|           |   |   |   |   |   |   |
|-----------|---|---|---|---|---|---|
| NM_018235 | 1 | 0 | 1 | 1 | 0 | 1 |
| NM_018237 | 1 | 0 | 1 | 0 | 0 | 0 |
| NM_018239 | 1 | 0 | 1 | 1 | 0 | 0 |
| NM_018240 | 0 | 0 | 0 | 0 | 0 | 1 |
| NM_018241 | 1 | 0 | 1 | 0 | 0 | 0 |
| NM_018242 | 1 | 0 | 1 | 0 | 0 | 1 |
| NM_018243 | 1 | 0 | 1 | 0 | 0 | 1 |
| NM_018244 | 1 | 1 | 1 | 1 | 0 | 1 |
| NM_018245 | 0 | 0 | 0 | 0 | 0 | 1 |
| NM_018246 | 1 | 1 | 1 | 1 | 1 | 1 |
| NM_018247 | 1 | 1 | 1 | 1 | 0 | 0 |
| NM_018248 | 1 | 0 | 1 | 0 | 1 | 1 |
| NM_018249 | 1 | 1 | 1 | 1 | 0 | 0 |
| NM_018250 | 1 | 0 | 1 | 1 | 0 | 0 |
| NM_018252 | 1 | 0 | 1 | 1 | 0 | 0 |
| NM_018253 | 1 | 0 | 1 | 0 | 0 | 1 |
| NM_018254 | 1 | 0 | 1 | 0 | 0 | 0 |
| NM_018255 | 1 | 0 | 1 | 1 | 0 | 0 |
| NM_018256 | 1 | 1 | 1 | 1 | 0 | 0 |
| NM_018257 | 1 | 1 | 1 | 0 | 1 | 1 |
| NM_018259 | 1 | 1 | 1 | 1 | 0 | 1 |
| NM_018260 | 1 | 0 | 1 | 1 | 1 | 1 |
| NM_018261 | 1 | 0 | 1 | 0 | 0 | 0 |
| NM_018264 | 1 | 1 | 1 | 1 | 1 | 0 |
| NM_018266 | 1 | 0 | 1 | 1 | 1 | 1 |
| NM_018267 | 1 | 0 | 1 | 0 | 1 | 1 |
| NM_018268 | 1 | 0 | 1 | 0 | 0 | 1 |
| NM_018269 | 1 | 1 | 1 | 1 | 0 | 1 |
| NM_018270 | 1 | 1 | 1 | 1 | 0 | 0 |
| NM_018271 | 1 | 0 | 1 | 0 | 1 | 1 |
| NM_018272 | 1 | 0 | 1 | 0 | 0 | 0 |
| NM_018273 | 1 | 0 | 1 | 0 | 0 | 0 |
| NM_018274 | 1 | 0 | 1 | 0 | 0 | 1 |
| NM_018275 | 1 | 0 | 1 | 1 | 0 | 0 |
| NM_018277 | 1 | 0 | 0 | 0 | 0 | 1 |
| NM_018278 | 1 | 1 | 1 | 1 | 0 | 0 |
| NM_018279 | 1 | 0 | 1 | 0 | 0 | 0 |
| NM_018280 | 1 | 0 | 1 | 0 | 0 | 0 |
| NM_018281 | 1 | 0 | 1 | 1 | 1 | 1 |
| NM_018282 | 1 | 1 | 1 | 1 | 0 | 0 |
| NM_018283 | 1 | 0 | 1 | 0 | 0 | 0 |
| NM_018284 | 1 | 1 | 1 | 1 | 0 | 0 |
| NM_018285 | 1 | 0 | 1 | 0 | 0 | 0 |
| NM_018287 | 1 | 1 | 1 | 1 | 1 | 0 |
| NM_018288 | 1 | 0 | 1 | 0 | 0 | 1 |
| NM_018289 | 1 | 0 | 1 | 0 | 0 | 0 |
| NM_018290 | 1 | 1 | 1 | 1 | 1 | 1 |
| NM_018291 | 1 | 1 | 1 | 1 | 0 | 1 |
| NM_018292 | 1 | 0 | 1 | 0 | 0 | 0 |
| NM_018293 | 1 | 0 | 1 | 0 | 0 | 0 |
| NM_018294 | 1 | 0 | 1 | 1 | 0 | 0 |
| NM_018295 | 1 | 1 | 1 | 1 | 1 | 1 |

|           |   |   |   |   |   |   |
|-----------|---|---|---|---|---|---|
| NM_018296 | 1 | 0 | 1 | 1 | 0 | 1 |
| NM_018297 | 1 | 0 | 1 | 0 | 0 | 0 |
| NM_018298 | 1 | 0 | 1 | 0 | 0 | 1 |
| NM_018299 | 1 | 0 | 1 | 1 | 0 | 1 |
| NM_018300 | 1 | 0 | 1 | 1 | 1 | 1 |
| NM_018302 | 0 | 0 | 0 | 0 | 0 | 1 |
| NM_018303 | 1 | 0 | 1 | 1 | 0 | 0 |
| NM_018304 | 1 | 0 | 1 | 0 | 0 | 0 |
| NM_018306 | 1 | 0 | 1 | 0 | 1 | 1 |
| NM_018307 | 1 | 1 | 1 | 1 | 1 | 0 |
| NM_018309 | 1 | 0 | 1 | 0 | 0 | 0 |
| NM_018310 | 1 | 0 | 1 | 1 | 0 | 0 |
| NM_018312 | 1 | 1 | 1 | 1 | 0 | 0 |
| NM_018313 | 1 | 1 | 1 | 1 | 0 | 0 |
| NM_018314 | 1 | 0 | 1 | 0 | 0 | 0 |
| NM_018315 | 1 | 0 | 1 | 0 | 0 | 0 |
| NM_018316 | 1 | 0 | 1 | 1 | 0 | 0 |
| NM_018317 | 1 | 1 | 1 | 1 | 0 | 0 |
| NM_018318 | 1 | 0 | 1 | 1 | 0 | 0 |
| NM_018319 | 1 | 0 | 1 | 0 | 0 | 0 |
| NM_018320 | 1 | 0 | 1 | 0 | 0 | 1 |
| NM_018321 | 1 | 0 | 1 | 1 | 1 | 1 |
| NM_018322 | 1 | 1 | 1 | 1 | 1 | 0 |
| NM_018323 | 1 | 0 | 1 | 0 | 0 | 1 |
| NM_018324 | 1 | 1 | 1 | 1 | 0 | 1 |
| NM_018326 | 1 | 0 | 1 | 0 | 1 | 1 |
| NM_018328 | 1 | 0 | 1 | 1 | 0 | 1 |
| NM_018329 | 1 | 0 | 1 | 0 | 0 | 1 |
| NM_018330 | 1 | 1 | 1 | 1 | 0 | 1 |
| NM_018331 | 0 | 0 | 1 | 0 | 0 | 0 |
| NM_018332 | 1 | 1 | 1 | 1 | 1 | 1 |
| NM_018334 | 1 | 1 | 1 | 1 | 0 | 1 |
| NM_018335 | 1 | 1 | 1 | 1 | 1 | 0 |
| NM_018336 | 1 | 0 | 1 | 1 | 0 | 1 |
| NM_018337 | 1 | 1 | 1 | 1 | 0 | 0 |
| NM_018338 | 1 | 0 | 1 | 0 | 0 | 0 |
| NM_018339 | 1 | 0 | 1 | 0 | 0 | 0 |
| NM_018340 | 1 | 1 | 1 | 1 | 0 | 1 |
| NM_018342 | 1 | 1 | 1 | 1 | 0 | 0 |
| NM_018343 | 1 | 1 | 1 | 1 | 0 | 0 |
| NM_018344 | 1 | 1 | 1 | 0 | 0 | 0 |
| NM_018346 | 1 | 0 | 1 | 1 | 1 | 1 |
| NM_018347 | 1 | 0 | 1 | 0 | 0 | 1 |
| NM_018348 | 1 | 0 | 1 | 0 | 1 | 0 |
| NM_018349 | 1 | 1 | 1 | 1 | 1 | 1 |
| NM_018350 | 0 | 1 | 1 | 1 | 0 | 0 |
| NM_018352 | 1 | 0 | 1 | 0 | 0 | 0 |
| NM_018353 | 1 | 1 | 1 | 1 | 0 | 0 |
| NM_018354 | 1 | 1 | 1 | 1 | 0 | 0 |
| NM_018355 | 1 | 0 | 1 | 0 | 0 | 0 |
| NM_018356 | 1 | 0 | 1 | 0 | 0 | 0 |
| NM_018357 | 0 | 0 | 0 | 1 | 0 | 0 |

|           |   |   |   |   |   |   |
|-----------|---|---|---|---|---|---|
| NM_018358 | 1 | 0 | 1 | 1 | 0 | 0 |
| NM_018359 | 1 | 0 | 1 | 1 | 1 | 1 |
| NM_018360 | 1 | 0 | 1 | 0 | 0 | 1 |
| NM_018361 | 1 | 0 | 1 | 1 | 0 | 1 |
| NM_018362 | 1 | 0 | 1 | 0 | 0 | 0 |
| NM_018363 | 1 | 0 | 1 | 1 | 0 | 0 |
| NM_018364 | 1 | 0 | 1 | 0 | 0 | 0 |
| NM_018365 | 1 | 0 | 1 | 1 | 0 | 1 |
| NM_018366 | 1 | 0 | 1 | 1 | 1 | 1 |
| NM_018367 | 1 | 1 | 1 | 1 | 0 | 0 |
| NM_018368 | 1 | 1 | 1 | 1 | 0 | 0 |
| NM_018369 | 1 | 1 | 1 | 0 | 0 | 0 |
| NM_018370 | 1 | 0 | 1 | 1 | 1 | 1 |
| NM_018371 | 1 | 0 | 1 | 1 | 0 | 1 |
| NM_018372 | 1 | 1 | 1 | 1 | 0 | 0 |
| NM_018373 | 1 | 0 | 1 | 1 | 0 | 1 |
| NM_018374 | 1 | 0 | 1 | 1 | 0 | 0 |
| NM_018375 | 1 | 0 | 1 | 0 | 0 | 1 |
| NM_018376 | 1 | 0 | 1 | 0 | 0 | 0 |
| NM_018378 | 1 | 0 | 1 | 0 | 0 | 1 |
| NM_018379 | 1 | 1 | 1 | 1 | 1 | 1 |
| NM_018380 | 1 | 1 | 1 | 1 | 0 | 1 |
| NM_018381 | 1 | 0 | 1 | 0 | 1 | 1 |
| NM_018383 | 1 | 1 | 1 | 1 | 0 | 0 |
| NM_018384 | 1 | 1 | 1 | 1 | 0 | 1 |
| NM_018385 | 1 | 0 | 1 | 0 | 0 | 0 |
| NM_018386 | 1 | 0 | 1 | 1 | 0 | 1 |
| NM_018387 | 1 | 0 | 1 | 1 | 0 | 0 |
| NM_018388 | 1 | 0 | 1 | 0 | 0 | 1 |
| NM_018389 | 1 | 1 | 1 | 1 | 1 | 0 |
| NM_018390 | 1 | 1 | 1 | 1 | 0 | 0 |
| NM_018391 | 1 | 1 | 1 | 0 | 0 | 1 |
| NM_018392 | 1 | 0 | 1 | 0 | 0 | 0 |
| NM_018393 | 1 | 0 | 1 | 1 | 0 | 0 |
| NM_018394 | 1 | 0 | 1 | 0 | 0 | 0 |
| NM_018396 | 1 | 0 | 1 | 0 | 0 | 1 |
| NM_018397 | 1 | 0 | 1 | 0 | 0 | 1 |
| NM_018398 | 1 | 1 | 1 | 1 | 0 | 1 |
| NM_018399 | 1 | 1 | 1 | 1 | 0 | 0 |
| NM_018400 | 1 | 0 | 0 | 0 | 0 | 0 |
| NM_018401 | 1 | 1 | 1 | 1 | 0 | 1 |
| NM_018402 | 1 | 1 | 1 | 1 | 0 | 0 |
| NM_018403 | 1 | 0 | 1 | 0 | 0 | 0 |
| NM_018404 | 1 | 1 | 1 | 1 | 1 | 1 |
| NM_018405 | 1 | 1 | 1 | 1 | 0 | 0 |
| NM_018407 | 1 | 0 | 1 | 0 | 0 | 0 |
| NM_018409 | 1 | 1 | 1 | 1 | 0 | 0 |
| NM_018410 | 1 | 1 | 1 | 0 | 1 | 1 |
| NM_018412 | 1 | 0 | 1 | 0 | 0 | 0 |
| NM_018413 | 1 | 0 | 1 | 1 | 1 | 1 |
| NM_018414 | 1 | 1 | 1 | 1 | 0 | 0 |
| NM_018415 | 1 | 1 | 1 | 1 | 1 | 1 |

|           |   |   |   |   |   |   |
|-----------|---|---|---|---|---|---|
| NM_018416 | 1 | 1 | 1 | 1 | 0 | 0 |
| NM_018417 | 1 | 0 | 0 | 0 | 0 | 0 |
| NM_018418 | 1 | 1 | 1 | 1 | 0 | 0 |
| NM_018419 | 1 | 1 | 1 | 1 | 0 | 0 |
| NM_018420 | 1 | 1 | 1 | 1 | 1 | 1 |
| NM_018421 | 1 | 1 | 1 | 1 | 1 | 1 |
| NM_018422 | 1 | 1 | 1 | 1 | 1 | 1 |
| NM_018423 | 1 | 1 | 1 | 1 | 0 | 1 |
| NM_018425 | 1 | 0 | 1 | 1 | 0 | 0 |
| NM_018427 | 1 | 0 | 1 | 1 | 0 | 0 |
| NM_018428 | 1 | 1 | 1 | 1 | 0 | 1 |
| NM_018429 | 1 | 0 | 1 | 0 | 0 | 1 |
| NM_018431 | 0 | 0 | 1 | 0 | 0 | 0 |
| NM_018433 | 1 | 1 | 1 | 1 | 1 | 1 |
| NM_018434 | 1 | 1 | 1 | 1 | 1 | 1 |
| NM_018437 | 1 | 1 | 1 | 1 | 1 | 0 |
| NM_018438 | 1 | 0 | 1 | 0 | 0 | 0 |
| NM_018439 | 1 | 1 | 1 | 1 | 1 | 1 |
| NM_018440 | 1 | 0 | 1 | 0 | 0 | 0 |
| NM_018441 | 1 | 1 | 1 | 1 | 0 | 0 |
| NM_018442 | 1 | 0 | 1 | 0 | 0 | 1 |
| NM_018444 | 1 | 0 | 1 | 0 | 0 | 1 |
| NM_018445 | 1 | 1 | 1 | 1 | 0 | 1 |
| NM_018446 | 1 | 0 | 1 | 1 | 1 | 1 |
| NM_018447 | 1 | 0 | 1 | 0 | 0 | 0 |
| NM_018448 | 1 | 0 | 1 | 0 | 1 | 1 |
| NM_018449 | 1 | 0 | 1 | 0 | 0 | 0 |
| NM_018450 | 1 | 0 | 1 | 0 | 0 | 0 |
| NM_018451 | 1 | 0 | 1 | 1 | 0 | 0 |
| NM_018452 | 1 | 0 | 1 | 0 | 1 | 1 |
| NM_018453 | 1 | 1 | 1 | 1 | 1 | 1 |
| NM_018454 | 1 | 0 | 1 | 1 | 0 | 1 |
| NM_018455 | 1 | 1 | 1 | 0 | 0 | 0 |
| NM_018456 | 1 | 0 | 1 | 0 | 1 | 1 |
| NM_018457 | 1 | 1 | 1 | 1 | 1 | 1 |
| NM_018458 | 1 | 0 | 1 | 1 | 1 | 1 |
| NM_018459 | 1 | 0 | 1 | 0 | 0 | 1 |
| NM_018460 | 1 | 1 | 1 | 1 | 0 | 1 |
| NM_018462 | 1 | 0 | 1 | 1 | 0 | 0 |
| NM_018463 | 1 | 0 | 1 | 1 | 0 | 0 |
| NM_018464 | 1 | 0 | 1 | 1 | 1 | 1 |
| NM_018465 | 1 | 1 | 1 | 1 | 0 | 1 |
| NM_018466 | 1 | 1 | 1 | 1 | 0 | 1 |
| NM_018467 | 1 | 1 | 1 | 1 | 0 | 1 |
| NM_018469 | 1 | 1 | 1 | 1 | 0 | 1 |
| NM_018470 | 1 | 0 | 1 | 0 | 0 | 0 |
| NM_018471 | 1 | 0 | 1 | 0 | 0 | 0 |
| NM_018472 | 1 | 1 | 1 | 1 | 0 | 0 |
| NM_018473 | 1 | 0 | 1 | 0 | 0 | 0 |
| NM_018474 | 1 | 0 | 1 | 1 | 1 | 0 |
| NM_018475 | 1 | 1 | 1 | 1 | 0 | 0 |
| NM_018476 | 1 | 0 | 1 | 0 | 0 | 1 |

|           |   |   |   |   |   |   |
|-----------|---|---|---|---|---|---|
| NM_018477 | 1 | 0 | 1 | 0 | 0 | 0 |
| NM_018478 | 1 | 1 | 1 | 1 | 0 | 0 |
| NM_018479 | 1 | 1 | 1 | 1 | 1 | 1 |
| NM_018480 | 1 | 0 | 1 | 1 | 1 | 1 |
| NM_018484 | 1 | 0 | 1 | 0 | 0 | 0 |
| NM_018485 | 1 | 1 | 1 | 1 | 0 | 1 |
| NM_018486 | 1 | 0 | 1 | 1 | 0 | 0 |
| NM_018487 | 1 | 0 | 1 | 0 | 0 | 1 |
| NM_018489 | 1 | 0 | 1 | 0 | 0 | 0 |
| NM_018490 | 1 | 0 | 1 | 0 | 0 | 1 |
| NM_018491 | 1 | 1 | 1 | 1 | 1 | 1 |
| NM_018492 | 1 | 0 | 1 | 0 | 1 | 1 |
| NM_018502 | 1 | 1 | 1 | 1 | 1 | 1 |
| NM_018503 | 1 | 0 | 1 | 0 | 0 | 0 |
| NM_018505 | 1 | 0 | 1 | 0 | 0 | 1 |
| NM_018507 | 1 | 0 | 1 | 0 | 0 | 0 |
| NM_018509 | 1 | 1 | 1 | 1 | 1 | 1 |
| NM_018510 | 1 | 0 | 1 | 0 | 0 | 1 |
| NM_018518 | 1 | 0 | 1 | 0 | 0 | 0 |
| NM_018520 | 1 | 1 | 1 | 1 | 0 | 0 |
| NM_018527 | 1 | 1 | 1 | 1 | 0 | 0 |
| NM_018529 | 1 | 1 | 1 | 1 | 0 | 1 |
| NM_018530 | 1 | 1 | 1 | 1 | 0 | 1 |
| NM_018534 | 0 | 0 | 0 | 0 | 0 | 1 |
| NM_018538 | 1 | 0 | 1 | 0 | 0 | 1 |
| NM_018540 | 0 | 0 | 1 | 0 | 0 | 0 |
| NM_018545 | 1 | 1 | 1 | 1 | 1 | 1 |
| NM_018547 | 1 | 0 | 0 | 1 | 0 | 0 |
| NM_018553 | 1 | 1 | 1 | 1 | 0 | 0 |
| NM_018554 | 1 | 0 | 1 | 0 | 1 | 0 |
| NM_018555 | 1 | 1 | 1 | 1 | 1 | 1 |
| NM_018556 | 1 | 1 | 1 | 1 | 0 | 1 |
| NM_018558 | 1 | 0 | 1 | 1 | 0 | 0 |
| NM_018559 | 1 | 0 | 1 | 1 | 0 | 1 |
| NM_018561 | 1 | 1 | 1 | 1 | 0 | 0 |
| NM_018562 | 1 | 1 | 1 | 1 | 0 | 0 |
| NM_018567 | 1 | 0 | 1 | 0 | 0 | 1 |
| NM_018569 | 1 | 0 | 1 | 1 | 0 | 0 |
| NM_018571 | 1 | 1 | 1 | 1 | 1 | 1 |
| NM_018573 | 1 | 1 | 1 | 1 | 1 | 1 |
| NM_018579 | 1 | 0 | 1 | 1 | 1 | 1 |
| NM_018582 | 1 | 0 | 0 | 0 | 0 | 0 |
| NM_018584 | 1 | 0 | 1 | 1 | 0 | 0 |
| NM_018585 | 1 | 1 | 1 | 1 | 1 | 1 |
| NM_018587 | 0 | 0 | 0 | 0 | 0 | 1 |
| NM_018589 | 1 | 1 | 1 | 1 | 0 | 1 |
| NM_018590 | 1 | 0 | 1 | 0 | 0 | 1 |
| NM_018593 | 1 | 0 | 1 | 0 | 0 | 0 |
| NM_018594 | 1 | 0 | 1 | 0 | 1 | 1 |
| NM_018602 | 1 | 0 | 1 | 1 | 0 | 1 |
| NM_018603 | 1 | 1 | 1 | 1 | 0 | 1 |
| NM_018606 | 1 | 0 | 1 | 0 | 0 | 1 |



|           |   |   |   |   |   |   |
|-----------|---|---|---|---|---|---|
| NM_018607 | 1 | 0 | 1 | 0 | 0 | 1 |
| NM_018608 | 1 | 0 | 0 | 0 | 0 | 0 |
| NM_018615 | 0 | 0 | 0 | 0 | 0 | 1 |
| NM_018621 | 1 | 0 | 1 | 1 | 0 | 0 |
| NM_018622 | 1 | 1 | 1 | 1 | 1 | 1 |
| NM_018623 | 1 | 1 | 1 | 1 | 1 | 1 |
| NM_018624 | 1 | 1 | 1 | 0 | 0 | 0 |
| NM_018638 | 1 | 0 | 1 | 0 | 1 | 1 |
| NM_018639 | 1 | 1 | 1 | 0 | 1 | 1 |
| NM_018641 | 1 | 0 | 1 | 0 | 1 | 0 |
| NM_018643 | 1 | 1 | 1 | 1 | 0 | 0 |
| NM_018645 | 1 | 1 | 1 | 1 | 0 | 1 |
| NM_018646 | 1 | 0 | 1 | 0 | 0 | 0 |
| NM_018648 | 1 | 0 | 1 | 1 | 0 | 0 |
| NM_018649 | 1 | 0 | 1 | 0 | 0 | 0 |
| NM_018650 | 1 | 0 | 0 | 0 | 0 | 0 |
| NM_018651 | 1 | 1 | 1 | 1 | 0 | 0 |
| NM_018652 | 1 | 0 | 1 | 0 | 1 | 0 |
| NM_018653 | 1 | 1 | 1 | 1 | 0 | 1 |
| NM_018654 | 1 | 0 | 0 | 0 | 0 | 1 |
| NM_018655 | 1 | 0 | 1 | 0 | 0 | 0 |
| NM_018656 | 1 | 1 | 1 | 1 | 0 | 1 |
| NM_018657 | 1 | 1 | 1 | 1 | 1 | 1 |
| NM_018659 | 1 | 0 | 1 | 1 | 0 | 0 |
| NM_018660 | 1 | 1 | 1 | 1 | 0 | 1 |
| NM_018662 | 1 | 1 | 1 | 1 | 0 | 0 |
| NM_018663 | 1 | 0 | 1 | 0 | 1 | 1 |
| NM_018664 | 1 | 1 | 1 | 1 | 0 | 1 |
| NM_018665 | 1 | 0 | 1 | 0 | 0 | 1 |
| NM_018666 | 1 | 0 | 1 | 1 | 0 | 0 |
| NM_018667 | 1 | 0 | 1 | 1 | 1 | 1 |
| NM_018668 | 1 | 0 | 1 | 1 | 0 | 0 |
| NM_018670 | 1 | 0 | 1 | 0 | 0 | 0 |
| NM_018671 | 1 | 0 | 1 | 0 | 0 | 1 |
| NM_018672 | 1 | 0 | 1 | 0 | 1 | 1 |
| NM_018674 | 1 | 0 | 1 | 0 | 0 | 0 |
| NM_018675 | 1 | 0 | 1 | 1 | 0 | 0 |
| NM_018676 | 1 | 0 | 1 | 1 | 1 | 1 |
| NM_018677 | 1 | 0 | 1 | 0 | 0 | 1 |
| NM_018678 | 1 | 0 | 1 | 0 | 0 | 0 |
| NM_018679 | 0 | 0 | 0 | 0 | 0 | 1 |
| NM_018682 | 1 | 1 | 1 | 1 | 0 | 1 |
| NM_018683 | 1 | 1 | 1 | 1 | 1 | 1 |
| NM_018684 | 1 | 1 | 1 | 1 | 0 | 0 |
| NM_018685 | 1 | 1 | 1 | 0 | 0 | 1 |
| NM_018686 | 1 | 0 | 1 | 1 | 0 | 1 |
| NM_018687 | 1 | 1 | 1 | 1 | 1 | 1 |
| NM_018688 | 1 | 1 | 1 | 1 | 0 | 1 |
| NM_018690 | 1 | 0 | 1 | 1 | 1 | 1 |
| NM_018691 | 1 | 1 | 1 | 0 | 1 | 1 |
| NM_018692 | 1 | 1 | 1 | 1 | 0 | 1 |
| NM_018693 | 1 | 0 | 1 | 1 | 0 | 0 |

|           |   |   |   |   |   |   |
|-----------|---|---|---|---|---|---|
| NM_018695 | 1 | 0 | 1 | 0 | 0 | 1 |
| NM_018696 | 1 | 0 | 1 | 1 | 1 | 1 |
| NM_018697 | 1 | 1 | 1 | 1 | 0 | 0 |
| NM_018698 | 1 | 0 | 1 | 0 | 0 | 1 |
| NM_018699 | 1 | 1 | 1 | 1 | 1 | 1 |
| NM_018700 | 1 | 0 | 1 | 0 | 0 | 0 |
| NM_018702 | 1 | 1 | 1 | 1 | 0 | 0 |
| NM_018703 | 1 | 1 | 1 | 1 | 0 | 0 |
| NM_018704 | 1 | 1 | 1 | 1 | 0 | 1 |
| NM_018705 | 1 | 1 | 1 | 1 | 1 | 1 |
| NM_018706 | 1 | 1 | 1 | 1 | 0 | 0 |
| NM_018708 | 1 | 1 | 1 | 1 | 0 | 0 |
| NM_018710 | 1 | 1 | 1 | 1 | 0 | 0 |
| NM_018711 | 1 | 0 | 1 | 0 | 0 | 0 |
| NM_018713 | 0 | 1 | 0 | 0 | 0 | 0 |
| NM_018714 | 1 | 1 | 1 | 1 | 0 | 0 |
| NM_018715 | 1 | 1 | 1 | 1 | 0 | 0 |
| NM_018718 | 1 | 0 | 1 | 1 | 1 | 1 |
| NM_018719 | 1 | 1 | 1 | 1 | 0 | 1 |
| NM_018722 | 1 | 0 | 1 | 1 | 0 | 0 |
| NM_018725 | 1 | 0 | 1 | 0 | 0 | 0 |
| NM_018727 | 1 | 1 | 1 | 0 | 0 | 0 |
| NM_018728 | 1 | 1 | 1 | 1 | 1 | 1 |
| NM_018833 | 1 | 0 | 1 | 0 | 0 | 0 |
| NM_018834 | 1 | 0 | 1 | 0 | 1 | 0 |
| NM_018835 | 1 | 0 | 1 | 1 | 1 | 1 |
| NM_018836 | 1 | 1 | 1 | 1 | 1 | 0 |
| NM_018837 | 1 | 1 | 1 | 1 | 0 | 1 |
| NM_018838 | 1 | 1 | 1 | 1 | 0 | 1 |
| NM_018839 | 1 | 1 | 1 | 1 | 0 | 0 |
| NM_018840 | 1 | 1 | 1 | 1 | 1 | 1 |
| NM_018841 | 0 | 0 | 0 | 0 | 0 | 1 |
| NM_018842 | 1 | 1 | 1 | 1 | 0 | 1 |
| NM_018843 | 1 | 0 | 1 | 1 | 0 | 0 |
| NM_018844 | 1 | 0 | 1 | 0 | 0 | 0 |
| NM_018845 | 1 | 0 | 1 | 0 | 0 | 1 |
| NM_018846 | 1 | 0 | 1 | 0 | 0 | 0 |
| NM_018847 | 1 | 0 | 1 | 0 | 0 | 0 |
| NM_018849 | 1 | 0 | 1 | 0 | 1 | 1 |
| NM_018890 | 1 | 1 | 1 | 1 | 0 | 0 |
| NM_018891 | 0 | 0 | 0 | 1 | 0 | 0 |
| NM_018896 | 0 | 0 | 0 | 0 | 0 | 1 |
| NM_018897 | 1 | 1 | 1 | 1 | 0 | 1 |
| NM_018898 | 1 | 1 | 1 | 1 | 0 | 0 |
| NM_018899 | 1 | 0 | 0 | 0 | 0 | 0 |
| NM_018900 | 0 | 0 | 0 | 0 | 0 | 1 |
| NM_018902 | 0 | 0 | 0 | 0 | 0 | 1 |
| NM_018905 | 1 | 0 | 1 | 0 | 0 | 0 |
| NM_018906 | 0 | 1 | 1 | 1 | 0 | 0 |
| NM_018907 | 0 | 0 | 1 | 0 | 0 | 0 |
| NM_018909 | 1 | 0 | 0 | 0 | 0 | 1 |
| NM_018910 | 1 | 0 | 1 | 0 | 0 | 0 |

|           |   |   |   |   |   |   |
|-----------|---|---|---|---|---|---|
| NM_018911 | 0 | 0 | 0 | 0 | 0 | 1 |
| NM_018912 | 1 | 1 | 1 | 1 | 0 | 0 |
| NM_018913 | 1 | 1 | 1 | 1 | 1 | 1 |
| NM_018915 | 1 | 1 | 1 | 1 | 0 | 0 |
| NM_018916 | 1 | 1 | 1 | 1 | 0 | 0 |
| NM_018917 | 1 | 1 | 1 | 1 | 1 | 1 |
| NM_018918 | 1 | 1 | 1 | 1 | 1 | 0 |
| NM_018919 | 1 | 1 | 1 | 1 | 1 | 1 |
| NM_018920 | 1 | 1 | 1 | 1 | 0 | 0 |
| NM_018921 | 1 | 1 | 1 | 1 | 0 | 0 |
| NM_018922 | 1 | 1 | 1 | 1 | 0 | 0 |
| NM_018923 | 1 | 1 | 1 | 0 | 0 | 1 |
| NM_018924 | 1 | 1 | 1 | 1 | 0 | 0 |
| NM_018925 | 1 | 0 | 1 | 1 | 0 | 0 |
| NM_018926 | 1 | 1 | 1 | 1 | 1 | 0 |
| NM_018927 | 1 | 1 | 1 | 1 | 1 | 1 |
| NM_018928 | 1 | 1 | 1 | 1 | 1 | 0 |
| NM_018929 | 1 | 1 | 1 | 1 | 0 | 0 |
| NM_018930 | 1 | 1 | 1 | 1 | 0 | 0 |
| NM_018933 | 1 | 1 | 1 | 1 | 0 | 0 |
| NM_018934 | 1 | 0 | 1 | 0 | 0 | 0 |
| NM_018935 | 1 | 0 | 1 | 0 | 0 | 0 |
| NM_018936 | 1 | 1 | 1 | 1 | 1 | 0 |
| NM_018937 | 1 | 1 | 0 | 0 | 0 | 0 |
| NM_018938 | 0 | 0 | 0 | 0 | 0 | 1 |
| NM_018939 | 1 | 1 | 1 | 1 | 0 | 0 |
| NM_018941 | 1 | 1 | 1 | 1 | 0 | 0 |
| NM_018943 | 1 | 0 | 1 | 0 | 0 | 0 |
| NM_018944 | 1 | 0 | 1 | 0 | 0 | 1 |
| NM_018945 | 0 | 0 | 0 | 0 | 0 | 1 |
| NM_018946 | 1 | 1 | 1 | 0 | 1 | 1 |
| NM_018947 | 1 | 0 | 1 | 0 | 0 | 1 |
| NM_018948 | 1 | 0 | 1 | 0 | 1 | 1 |
| NM_018949 | 1 | 0 | 1 | 0 | 0 | 0 |
| NM_018950 | 0 | 0 | 1 | 0 | 0 | 0 |
| NM_018952 | 1 | 0 | 1 | 0 | 0 | 0 |
| NM_018953 | 1 | 1 | 1 | 1 | 0 | 0 |
| NM_018955 | 1 | 1 | 1 | 1 | 0 | 1 |
| NM_018956 | 1 | 0 | 0 | 0 | 0 | 0 |
| NM_018957 | 1 | 1 | 1 | 1 | 1 | 1 |
| NM_018960 | 1 | 1 | 1 | 1 | 0 | 0 |
| NM_018961 | 1 | 1 | 1 | 1 | 0 | 1 |
| NM_018962 | 0 | 0 | 1 | 0 | 0 | 0 |
| NM_018963 | 1 | 0 | 1 | 0 | 0 | 0 |
| NM_018964 | 1 | 1 | 1 | 1 | 1 | 1 |
| NM_018965 | 1 | 0 | 1 | 0 | 0 | 0 |
| NM_018968 | 1 | 0 | 1 | 1 | 1 | 1 |
| NM_018969 | 1 | 0 | 1 | 1 | 0 | 0 |
| NM_018970 | 0 | 0 | 0 | 1 | 0 | 0 |
| NM_018971 | 1 | 1 | 1 | 1 | 0 | 0 |
| NM_018972 | 1 | 0 | 1 | 0 | 0 | 0 |
| NM_018973 | 1 | 1 | 1 | 1 | 0 | 0 |

|           |   |   |   |   |   |   |
|-----------|---|---|---|---|---|---|
| NM_018974 | 1 | 0 | 1 | 0 | 0 | 1 |
| NM_018975 | 1 | 0 | 1 | 0 | 0 | 0 |
| NM_018976 | 1 | 1 | 1 | 1 | 1 | 1 |
| NM_018977 | 1 | 1 | 1 | 1 | 1 | 1 |
| NM_018978 | 1 | 0 | 1 | 0 | 0 | 1 |
| NM_018979 | 1 | 0 | 1 | 0 | 0 | 0 |
| NM_018980 | 1 | 0 | 1 | 0 | 0 | 0 |
| NM_018981 | 1 | 0 | 1 | 1 | 0 | 0 |
| NM_018982 | 1 | 0 | 1 | 1 | 0 | 0 |
| NM_018983 | 1 | 1 | 1 | 1 | 0 | 0 |
| NM_018984 | 1 | 0 | 1 | 1 | 1 | 1 |
| NM_018985 | 1 | 0 | 1 | 0 | 0 | 0 |
| NM_018986 | 1 | 1 | 1 | 1 | 0 | 0 |
| NM_018988 | 1 | 1 | 1 | 1 | 1 | 0 |
| NM_018990 | 1 | 1 | 0 | 0 | 0 | 1 |
| NM_018991 | 1 | 0 | 1 | 0 | 0 | 0 |
| NM_018992 | 1 | 0 | 1 | 1 | 0 | 0 |
| NM_018993 | 1 | 0 | 1 | 1 | 0 | 0 |
| NM_018995 | 1 | 0 | 1 | 1 | 0 | 0 |
| NM_018996 | 1 | 0 | 1 | 1 | 0 | 0 |
| NM_018997 | 1 | 1 | 1 | 1 | 1 | 1 |
| NM_018999 | 1 | 0 | 1 | 0 | 0 | 0 |
| NM_019000 | 1 | 1 | 1 | 1 | 0 | 1 |
| NM_019001 | 1 | 0 | 1 | 0 | 0 | 0 |
| NM_019002 | 1 | 0 | 1 | 1 | 1 | 1 |
| NM_019003 | 0 | 0 | 0 | 0 | 0 | 1 |
| NM_019005 | 1 | 1 | 1 | 1 | 1 | 1 |
| NM_019006 | 1 | 0 | 1 | 0 | 0 | 0 |
| NM_019007 | 1 | 0 | 1 | 1 | 0 | 0 |
| NM_019008 | 1 | 1 | 1 | 1 | 0 | 1 |
| NM_019009 | 1 | 1 | 1 | 1 | 0 | 0 |
| NM_019011 | 1 | 1 | 1 | 1 | 0 | 1 |
| NM_019012 | 1 | 0 | 1 | 1 | 1 | 1 |
| NM_019013 | 1 | 0 | 1 | 0 | 1 | 1 |
| NM_019014 | 1 | 0 | 1 | 0 | 0 | 0 |
| NM_019016 | 0 | 0 | 0 | 0 | 0 | 1 |
| NM_019018 | 1 | 1 | 1 | 1 | 1 | 1 |
| NM_019020 | 0 | 0 | 1 | 0 | 0 | 0 |
| NM_019021 | 1 | 1 | 1 | 1 | 0 | 0 |
| NM_019022 | 1 | 0 | 1 | 0 | 0 | 0 |
| NM_019023 | 1 | 1 | 1 | 1 | 0 | 1 |
| NM_019025 | 1 | 1 | 1 | 1 | 0 | 1 |
| NM_019026 | 1 | 0 | 1 | 0 | 0 | 0 |
| NM_019027 | 1 | 0 | 1 | 1 | 1 | 1 |
| NM_019028 | 1 | 0 | 1 | 0 | 0 | 1 |
| NM_019029 | 1 | 1 | 1 | 1 | 0 | 0 |
| NM_019030 | 1 | 0 | 1 | 0 | 1 | 1 |
| NM_019033 | 1 | 0 | 1 | 0 | 0 | 0 |
| NM_019034 | 1 | 0 | 1 | 1 | 0 | 0 |
| NM_019035 | 1 | 0 | 1 | 0 | 0 | 0 |
| NM_019037 | 1 | 0 | 1 | 1 | 0 | 0 |
| NM_019038 | 1 | 1 | 1 | 0 | 0 | 1 |

|           |   |   |   |   |   |   |
|-----------|---|---|---|---|---|---|
| NM_019039 | 1 | 0 | 0 | 0 | 0 | 1 |
| NM_019040 | 1 | 0 | 1 | 0 | 0 | 0 |
| NM_019041 | 1 | 1 | 1 | 0 | 0 | 0 |
| NM_019042 | 1 | 1 | 1 | 1 | 1 | 0 |
| NM_019043 | 1 | 1 | 1 | 1 | 1 | 1 |
| NM_019044 | 1 | 0 | 1 | 0 | 0 | 0 |
| NM_019045 | 1 | 0 | 1 | 0 | 0 | 0 |
| NM_019048 | 1 | 0 | 1 | 0 | 0 | 0 |
| NM_019049 | 1 | 0 | 1 | 0 | 0 | 0 |
| NM_019051 | 1 | 1 | 1 | 1 | 0 | 1 |
| NM_019052 | 1 | 1 | 1 | 1 | 0 | 0 |
| NM_019053 | 1 | 1 | 1 | 1 | 0 | 0 |
| NM_019054 | 1 | 0 | 1 | 1 | 1 | 1 |
| NM_019055 | 1 | 1 | 1 | 1 | 0 | 0 |
| NM_019056 | 1 | 1 | 1 | 1 | 0 | 0 |
| NM_019057 | 1 | 0 | 1 | 0 | 1 | 1 |
| NM_019058 | 1 | 1 | 1 | 1 | 1 | 0 |
| NM_019059 | 1 | 1 | 1 | 1 | 0 | 0 |
| NM_019061 | 1 | 0 | 1 | 0 | 0 | 0 |
| NM_019062 | 1 | 1 | 1 | 0 | 0 | 0 |
| NM_019063 | 1 | 1 | 1 | 1 | 0 | 1 |
| NM_019064 | 1 | 1 | 1 | 0 | 1 | 1 |
| NM_019065 | 1 | 0 | 1 | 1 | 0 | 0 |
| NM_019066 | 1 | 1 | 1 | 0 | 0 | 1 |
| NM_019067 | 1 | 0 | 1 | 0 | 0 | 1 |
| NM_019069 | 1 | 0 | 1 | 0 | 0 | 0 |
| NM_019070 | 1 | 1 | 1 | 1 | 0 | 0 |
| NM_019071 | 1 | 1 | 1 | 1 | 1 | 1 |
| NM_019072 | 1 | 0 | 1 | 1 | 0 | 1 |
| NM_019073 | 1 | 1 | 1 | 1 | 1 | 1 |
| NM_019074 | 1 | 0 | 0 | 0 | 0 | 1 |
| NM_019075 | 0 | 0 | 0 | 0 | 0 | 1 |
| NM_019076 | 1 | 0 | 1 | 1 | 0 | 0 |
| NM_019077 | 1 | 0 | 1 | 1 | 0 | 1 |
| NM_019079 | 1 | 1 | 1 | 1 | 0 | 0 |
| NM_019081 | 1 | 1 | 1 | 1 | 1 | 1 |
| NM_019082 | 1 | 1 | 1 | 1 | 0 | 0 |
| NM_019083 | 1 | 0 | 1 | 1 | 1 | 1 |
| NM_019084 | 1 | 1 | 1 | 1 | 0 | 0 |
| NM_019086 | 1 | 0 | 1 | 0 | 1 | 0 |
| NM_019087 | 1 | 0 | 1 | 0 | 0 | 0 |
| NM_019088 | 1 | 0 | 1 | 0 | 1 | 1 |
| NM_019089 | 1 | 0 | 1 | 0 | 0 | 0 |
| NM_019090 | 1 | 0 | 1 | 1 | 0 | 0 |
| NM_019091 | 1 | 0 | 1 | 0 | 0 | 0 |
| NM_019093 | 0 | 0 | 0 | 0 | 0 | 1 |
| NM_019094 | 1 | 1 | 1 | 0 | 0 | 1 |
| NM_019095 | 1 | 1 | 1 | 1 | 0 | 0 |
| NM_019096 | 1 | 0 | 1 | 0 | 1 | 1 |
| NM_019098 | 1 | 0 | 0 | 0 | 0 | 0 |
| NM_019099 | 1 | 1 | 1 | 1 | 0 | 1 |
| NM_019100 | 1 | 0 | 1 | 1 | 0 | 0 |

|           |   |   |   |   |   |   |
|-----------|---|---|---|---|---|---|
| NM_019101 | 1 | 1 | 1 | 1 | 0 | 1 |
| NM_019102 | 1 | 0 | 1 | 1 | 0 | 0 |
| NM_019103 | 0 | 0 | 1 | 0 | 0 | 0 |
| NM_019104 | 1 | 0 | 1 | 1 | 1 | 0 |
| NM_019105 | 1 | 0 | 1 | 0 | 0 | 0 |
| NM_019106 | 1 | 0 | 1 | 1 | 0 | 1 |
| NM_019107 | 1 | 1 | 1 | 1 | 1 | 1 |
| NM_019108 | 1 | 1 | 1 | 1 | 0 | 0 |
| NM_019109 | 1 | 0 | 1 | 0 | 0 | 0 |
| NM_019110 | 1 | 0 | 1 | 0 | 0 | 1 |
| NM_019111 | 1 | 0 | 1 | 0 | 0 | 1 |
| NM_019112 | 1 | 0 | 1 | 1 | 0 | 0 |
| NM_019113 | 1 | 0 | 0 | 0 | 0 | 0 |
| NM_019114 | 1 | 0 | 1 | 0 | 0 | 0 |
| NM_019116 | 1 | 0 | 1 | 0 | 0 | 1 |
| NM_019118 | 1 | 0 | 1 | 1 | 0 | 1 |
| NM_019120 | 1 | 1 | 1 | 1 | 0 | 0 |
| NM_019554 | 1 | 1 | 1 | 1 | 1 | 1 |
| NM_019555 | 1 | 1 | 1 | 1 | 0 | 0 |
| NM_019556 | 1 | 0 | 1 | 0 | 0 | 1 |
| NM_019557 | 1 | 1 | 1 | 1 | 0 | 0 |
| NM_019558 | 1 | 0 | 1 | 0 | 0 | 0 |
| NM_019559 | 0 | 0 | 0 | 0 | 0 | 1 |
| NM_019591 | 1 | 0 | 1 | 1 | 0 | 0 |
| NM_019592 | 1 | 1 | 1 | 1 | 0 | 0 |
| NM_019593 | 1 | 1 | 1 | 1 | 0 | 0 |
| NM_019596 | 1 | 1 | 1 | 1 | 0 | 0 |
| NM_019601 | 1 | 0 | 1 | 1 | 0 | 1 |
| NM_019602 | 1 | 1 | 1 | 0 | 0 | 0 |
| NM_019604 | 1 | 1 | 1 | 1 | 0 | 0 |
| NM_019605 | 1 | 0 | 1 | 1 | 0 | 0 |
| NM_019606 | 1 | 0 | 1 | 0 | 0 | 1 |
| NM_019607 | 1 | 0 | 1 | 1 | 0 | 1 |
| NM_019609 | 1 | 0 | 0 | 0 | 0 | 1 |
| NM_019610 | 1 | 0 | 1 | 1 | 0 | 0 |
| NM_019612 | 1 | 0 | 1 | 0 | 0 | 0 |
| NM_019613 | 1 | 0 | 1 | 0 | 1 | 1 |
| NM_019616 | 1 | 0 | 0 | 0 | 0 | 1 |
| NM_019617 | 1 | 0 | 0 | 0 | 0 | 1 |
| NM_019618 | 1 | 0 | 1 | 0 | 0 | 0 |
| NM_019619 | 1 | 0 | 1 | 0 | 0 | 0 |
| NM_019625 | 1 | 0 | 1 | 0 | 1 | 1 |
| NM_019644 | 1 | 0 | 0 | 0 | 0 | 0 |
| NM_019839 | 1 | 0 | 1 | 1 | 0 | 0 |
| NM_019841 | 1 | 0 | 1 | 0 | 0 | 0 |
| NM_019842 | 1 | 0 | 1 | 0 | 0 | 0 |
| NM_019843 | 1 | 0 | 1 | 1 | 1 | 1 |
| NM_019845 | 1 | 0 | 1 | 0 | 0 | 1 |
| NM_019846 | 1 | 0 | 1 | 0 | 1 | 1 |
| NM_019847 | 1 | 1 | 1 | 1 | 1 | 1 |
| NM_019848 | 1 | 0 | 1 | 0 | 0 | 1 |
| NM_019849 | 1 | 0 | 1 | 1 | 0 | 0 |

|           |   |   |   |   |   |   |
|-----------|---|---|---|---|---|---|
| NM_019850 | 1 | 0 | 1 | 1 | 0 | 1 |
| NM_019851 | 0 | 0 | 1 | 0 | 0 | 0 |
| NM_019852 | 1 | 1 | 1 | 1 | 0 | 0 |
| NM_019853 | 1 | 0 | 1 | 0 | 0 | 0 |
| NM_019854 | 1 | 1 | 0 | 1 | 0 | 1 |
| NM_019855 | 1 | 0 | 1 | 1 | 0 | 0 |
| NM_019858 | 1 | 1 | 1 | 1 | 0 | 1 |
| NM_019859 | 1 | 1 | 1 | 1 | 0 | 0 |
| NM_019860 | 1 | 1 | 1 | 1 | 0 | 0 |
| NM_019863 | 1 | 0 | 1 | 0 | 0 | 1 |
| NM_019884 | 1 | 0 | 1 | 0 | 0 | 0 |
| NM_019885 | 1 | 0 | 1 | 0 | 1 | 1 |
| NM_019886 | 1 | 1 | 1 | 0 | 0 | 1 |
| NM_019887 | 1 | 0 | 1 | 0 | 0 | 0 |
| NM_019891 | 1 | 1 | 1 | 1 | 1 | 0 |
| NM_019892 | 1 | 1 | 1 | 1 | 1 | 1 |
| NM_019894 | 1 | 0 | 1 | 0 | 0 | 1 |
| NM_019895 | 1 | 1 | 1 | 1 | 0 | 0 |
| NM_019896 | 1 | 0 | 1 | 0 | 0 | 0 |
| NM_019897 | 1 | 0 | 1 | 1 | 0 | 0 |
| NM_019901 | 1 | 1 | 1 | 1 | 0 | 0 |
| NM_020038 | 1 | 1 | 1 | 1 | 0 | 1 |
| NM_020039 | 1 | 0 | 1 | 0 | 0 | 0 |
| NM_020040 | 1 | 0 | 1 | 0 | 0 | 1 |
| NM_020041 | 1 | 1 | 1 | 1 | 0 | 1 |
| NM_020056 | 1 | 0 | 1 | 0 | 0 | 1 |
| NM_020061 | 1 | 0 | 1 | 1 | 0 | 0 |
| NM_020062 | 1 | 1 | 1 | 1 | 1 | 1 |
| NM_020070 | 1 | 0 | 1 | 0 | 0 | 0 |
| NM_020107 | 0 | 0 | 0 | 0 | 0 | 1 |
| NM_020115 | 0 | 0 | 0 | 0 | 0 | 1 |
| NM_020116 | 0 | 0 | 1 | 0 | 0 | 0 |
| NM_020117 | 1 | 1 | 1 | 1 | 0 | 0 |
| NM_020119 | 1 | 0 | 1 | 1 | 0 | 0 |
| NM_020120 | 1 | 1 | 1 | 1 | 0 | 0 |
| NM_020121 | 1 | 1 | 1 | 0 | 0 | 0 |
| NM_020122 | 1 | 0 | 1 | 0 | 1 | 1 |
| NM_020123 | 1 | 0 | 1 | 0 | 0 | 1 |
| NM_020124 | 1 | 0 | 1 | 0 | 0 | 0 |
| NM_020125 | 1 | 0 | 1 | 0 | 0 | 1 |
| NM_020126 | 1 | 1 | 1 | 1 | 0 | 1 |
| NM_020127 | 1 | 0 | 1 | 1 | 1 | 1 |
| NM_020128 | 1 | 0 | 1 | 0 | 0 | 0 |
| NM_020129 | 0 | 0 | 0 | 0 | 0 | 1 |
| NM_020130 | 1 | 0 | 1 | 0 | 0 | 1 |
| NM_020131 | 1 | 0 | 1 | 0 | 0 | 0 |
| NM_020132 | 1 | 1 | 1 | 0 | 0 | 1 |
| NM_020133 | 1 | 1 | 1 | 1 | 1 | 1 |
| NM_020134 | 1 | 0 | 1 | 0 | 0 | 0 |
| NM_020135 | 1 | 1 | 1 | 1 | 0 | 1 |
| NM_020137 | 1 | 0 | 1 | 0 | 0 | 1 |
| NM_020139 | 1 | 0 | 1 | 1 | 0 | 0 |

|           |   |   |   |   |   |   |
|-----------|---|---|---|---|---|---|
| NM_020140 | 0 | 0 | 0 | 0 | 0 | 1 |
| NM_020141 | 1 | 1 | 1 | 1 | 0 | 1 |
| NM_020142 | 1 | 0 | 0 | 0 | 0 | 0 |
| NM_020143 | 1 | 1 | 1 | 1 | 0 | 1 |
| NM_020144 | 1 | 0 | 1 | 0 | 0 | 0 |
| NM_020145 | 1 | 0 | 1 | 1 | 0 | 0 |
| NM_020147 | 1 | 0 | 1 | 0 | 0 | 0 |
| NM_020150 | 1 | 0 | 1 | 0 | 0 | 1 |
| NM_020151 | 1 | 1 | 1 | 1 | 0 | 1 |
| NM_020152 | 1 | 0 | 1 | 1 | 1 | 1 |
| NM_020153 | 1 | 0 | 1 | 1 | 1 | 1 |
| NM_020154 | 1 | 0 | 1 | 0 | 0 | 1 |
| NM_020155 | 1 | 1 | 1 | 1 | 0 | 0 |
| NM_020156 | 1 | 1 | 1 | 1 | 1 | 1 |
| NM_020157 | 1 | 0 | 0 | 0 | 0 | 1 |
| NM_020158 | 1 | 1 | 1 | 1 | 0 | 0 |
| NM_020159 | 1 | 0 | 1 | 1 | 0 | 0 |
| NM_020161 | 1 | 0 | 1 | 1 | 0 | 0 |
| NM_020162 | 1 | 1 | 1 | 1 | 0 | 1 |
| NM_020163 | 1 | 1 | 1 | 1 | 1 | 1 |
| NM_020164 | 1 | 0 | 1 | 1 | 0 | 0 |
| NM_020165 | 1 | 0 | 1 | 0 | 1 | 1 |
| NM_020166 | 1 | 1 | 1 | 1 | 1 | 1 |
| NM_020167 | 1 | 1 | 1 | 1 | 0 | 0 |
| NM_020168 | 1 | 1 | 1 | 1 | 0 | 0 |
| NM_020169 | 1 | 1 | 1 | 1 | 0 | 1 |
| NM_020170 | 1 | 1 | 1 | 1 | 0 | 1 |
| NM_020172 | 1 | 0 | 1 | 1 | 0 | 1 |
| NM_020175 | 1 | 1 | 1 | 1 | 0 | 0 |
| NM_020177 | 1 | 1 | 1 | 1 | 0 | 1 |
| NM_020179 | 1 | 0 | 1 | 0 | 1 | 1 |
| NM_020180 | 1 | 0 | 1 | 0 | 0 | 1 |
| NM_020181 | 0 | 0 | 0 | 1 | 0 | 0 |
| NM_020182 | 1 | 0 | 1 | 0 | 1 | 0 |
| NM_020183 | 0 | 0 | 0 | 0 | 0 | 1 |
| NM_020184 | 1 | 0 | 1 | 0 | 1 | 1 |
| NM_020185 | 1 | 0 | 1 | 0 | 0 | 0 |
| NM_020186 | 1 | 0 | 1 | 0 | 0 | 0 |
| NM_020187 | 1 | 0 | 1 | 0 | 0 | 0 |
| NM_020188 | 1 | 0 | 1 | 0 | 1 | 1 |
| NM_020189 | 1 | 0 | 1 | 0 | 0 | 0 |
| NM_020190 | 1 | 0 | 1 | 1 | 1 | 1 |
| NM_020191 | 1 | 0 | 1 | 1 | 0 | 1 |
| NM_020192 | 1 | 0 | 1 | 1 | 1 | 1 |
| NM_020193 | 1 | 0 | 1 | 0 | 0 | 0 |
| NM_020194 | 1 | 0 | 1 | 0 | 0 | 1 |
| NM_020195 | 1 | 1 | 1 | 1 | 1 | 1 |
| NM_020196 | 1 | 0 | 1 | 0 | 0 | 0 |
| NM_020197 | 1 | 1 | 1 | 1 | 0 | 1 |
| NM_020198 | 1 | 0 | 1 | 0 | 0 | 0 |
| NM_020199 | 1 | 1 | 1 | 1 | 0 | 1 |
| NM_020200 | 1 | 0 | 1 | 0 | 0 | 0 |



|           |   |   |   |   |   |   |
|-----------|---|---|---|---|---|---|
| NM_020201 | 1 | 0 | 1 | 0 | 1 | 1 |
| NM_020202 | 1 | 0 | 1 | 0 | 0 | 1 |
| NM_020203 | 1 | 0 | 0 | 0 | 0 | 0 |
| NM_020205 | 1 | 0 | 1 | 0 | 0 | 0 |
| NM_020208 | 1 | 0 | 0 | 0 | 0 | 0 |
| NM_020210 | 1 | 0 | 1 | 1 | 0 | 0 |
| NM_020211 | 1 | 1 | 1 | 1 | 0 | 0 |
| NM_020213 | 1 | 1 | 1 | 1 | 0 | 0 |
| NM_020215 | 1 | 1 | 1 | 1 | 1 | 1 |
| NM_020216 | 1 | 1 | 1 | 0 | 1 | 1 |
| NM_020219 | 1 | 0 | 1 | 0 | 0 | 0 |
| NM_020223 | 1 | 1 | 1 | 1 | 1 | 1 |
| NM_020224 | 1 | 0 | 1 | 0 | 0 | 0 |
| NM_020226 | 1 | 0 | 1 | 0 | 0 | 0 |
| NM_020227 | 1 | 1 | 1 | 0 | 0 | 0 |
| NM_020228 | 1 | 0 | 1 | 0 | 0 | 1 |
| NM_020229 | 1 | 1 | 1 | 1 | 0 | 0 |
| NM_020230 | 1 | 0 | 1 | 0 | 0 | 0 |
| NM_020231 | 1 | 0 | 1 | 0 | 1 | 1 |
| NM_020232 | 1 | 0 | 1 | 0 | 0 | 0 |
| NM_020233 | 1 | 1 | 1 | 1 | 0 | 1 |
| NM_020234 | 1 | 0 | 1 | 1 | 1 | 1 |
| NM_020235 | 1 | 1 | 1 | 1 | 0 | 1 |
| NM_020236 | 1 | 0 | 1 | 1 | 1 | 1 |
| NM_020238 | 0 | 0 | 0 | 0 | 0 | 1 |
| NM_020239 | 1 | 1 | 1 | 1 | 0 | 1 |
| NM_020240 | 1 | 0 | 1 | 0 | 0 | 0 |
| NM_020241 | 1 | 1 | 1 | 1 | 0 | 0 |
| NM_020242 | 1 | 1 | 1 | 0 | 0 | 1 |
| NM_020243 | 1 | 1 | 1 | 1 | 0 | 0 |
| NM_020244 | 1 | 1 | 1 | 1 | 1 | 1 |
| NM_020245 | 1 | 0 | 1 | 1 | 0 | 0 |
| NM_020246 | 1 | 0 | 1 | 1 | 0 | 1 |
| NM_020247 | 1 | 0 | 1 | 0 | 0 | 0 |
| NM_020248 | 1 | 1 | 1 | 1 | 1 | 1 |
| NM_020250 | 1 | 0 | 0 | 0 | 0 | 0 |
| NM_020298 | 0 | 0 | 0 | 0 | 0 | 1 |
| NM_020299 | 1 | 0 | 1 | 0 | 0 | 0 |
| NM_020300 | 1 | 1 | 1 | 1 | 1 | 1 |
| NM_020307 | 1 | 0 | 1 | 0 | 0 | 1 |
| NM_020309 | 1 | 0 | 1 | 0 | 0 | 0 |
| NM_020310 | 1 | 0 | 1 | 0 | 0 | 1 |
| NM_020311 | 1 | 0 | 1 | 0 | 0 | 0 |
| NM_020313 | 1 | 1 | 1 | 1 | 0 | 1 |
| NM_020314 | 1 | 0 | 1 | 0 | 1 | 1 |
| NM_020315 | 1 | 1 | 1 | 1 | 0 | 0 |
| NM_020317 | 1 | 0 | 1 | 1 | 1 | 1 |
| NM_020318 | 1 | 0 | 1 | 0 | 0 | 0 |
| NM_020319 | 1 | 0 | 1 | 1 | 1 | 1 |
| NM_020320 | 1 | 0 | 1 | 0 | 0 | 0 |
| NM_020321 | 1 | 1 | 1 | 1 | 0 | 0 |
| NM_020323 | 1 | 0 | 1 | 0 | 0 | 1 |

|           |   |   |   |   |   |   |
|-----------|---|---|---|---|---|---|
| NM_020327 | 0 | 0 | 1 | 0 | 0 | 0 |
| NM_020328 | 1 | 0 | 1 | 0 | 0 | 0 |
| NM_020338 | 1 | 1 | 1 | 1 | 0 | 0 |
| NM_020340 | 1 | 0 | 1 | 0 | 0 | 0 |
| NM_020344 | 1 | 1 | 1 | 1 | 1 | 1 |
| NM_020345 | 1 | 0 | 1 | 0 | 0 | 0 |
| NM_020346 | 1 | 1 | 1 | 1 | 0 | 0 |
| NM_020347 | 1 | 1 | 1 | 1 | 1 | 1 |
| NM_020348 | 1 | 1 | 1 | 1 | 0 | 0 |
| NM_020349 | 1 | 1 | 1 | 0 | 0 | 1 |
| NM_020350 | 1 | 0 | 1 | 1 | 1 | 1 |
| NM_020353 | 1 | 0 | 1 | 0 | 0 | 1 |
| NM_020354 | 1 | 1 | 1 | 1 | 0 | 0 |
| NM_020356 | 1 | 0 | 1 | 1 | 0 | 0 |
| NM_020357 | 1 | 0 | 1 | 0 | 1 | 1 |
| NM_020358 | 0 | 0 | 1 | 0 | 0 | 0 |
| NM_020360 | 1 | 1 | 1 | 1 | 0 | 1 |
| NM_020361 | 1 | 1 | 1 | 1 | 0 | 0 |
| NM_020362 | 1 | 0 | 1 | 0 | 0 | 1 |
| NM_020364 | 1 | 0 | 1 | 0 | 0 | 1 |
| NM_020365 | 1 | 1 | 1 | 1 | 0 | 0 |
| NM_020366 | 1 | 1 | 1 | 1 | 1 | 1 |
| NM_020367 | 1 | 0 | 1 | 1 | 0 | 1 |
| NM_020368 | 1 | 0 | 1 | 1 | 0 | 1 |
| NM_020370 | 1 | 0 | 1 | 0 | 0 | 0 |
| NM_020371 | 1 | 0 | 1 | 1 | 0 | 1 |
| NM_020373 | 1 | 0 | 1 | 0 | 0 | 1 |
| NM_020374 | 1 | 0 | 1 | 1 | 0 | 0 |
| NM_020375 | 1 | 0 | 1 | 0 | 1 | 1 |
| NM_020376 | 1 | 0 | 1 | 1 | 0 | 1 |
| NM_020377 | 1 | 1 | 1 | 1 | 0 | 1 |
| NM_020378 | 1 | 0 | 1 | 0 | 0 | 0 |
| NM_020379 | 1 | 1 | 1 | 1 | 0 | 1 |
| NM_020380 | 1 | 0 | 1 | 0 | 0 | 0 |
| NM_020381 | 1 | 1 | 1 | 0 | 0 | 0 |
| NM_020382 | 1 | 0 | 1 | 0 | 0 | 1 |
| NM_020383 | 1 | 0 | 1 | 1 | 1 | 1 |
| NM_020385 | 1 | 1 | 1 | 1 | 0 | 0 |
| NM_020386 | 1 | 0 | 1 | 0 | 0 | 0 |
| NM_020387 | 0 | 0 | 0 | 0 | 0 | 1 |
| NM_020389 | 1 | 0 | 0 | 0 | 0 | 0 |
| NM_020390 | 1 | 0 | 1 | 0 | 0 | 0 |
| NM_020393 | 1 | 0 | 1 | 0 | 0 | 0 |
| NM_020394 | 0 | 0 | 0 | 0 | 0 | 1 |
| NM_020395 | 1 | 0 | 1 | 0 | 0 | 0 |
| NM_020396 | 0 | 1 | 0 | 0 | 0 | 0 |
| NM_020397 | 1 | 0 | 1 | 0 | 0 | 0 |
| NM_020399 | 1 | 0 | 1 | 0 | 1 | 1 |
| NM_020400 | 1 | 1 | 1 | 1 | 1 | 1 |
| NM_020401 | 1 | 1 | 1 | 1 | 1 | 0 |
| NM_020402 | 1 | 1 | 1 | 1 | 0 | 0 |
| NM_020403 | 1 | 0 | 1 | 0 | 0 | 1 |

|           |   |   |   |   |   |   |
|-----------|---|---|---|---|---|---|
| NM_020404 | 1 | 0 | 1 | 0 | 0 | 0 |
| NM_020405 | 1 | 1 | 1 | 1 | 1 | 1 |
| NM_020406 | 1 | 1 | 1 | 1 | 1 | 1 |
| NM_020408 | 1 | 0 | 1 | 0 | 0 | 0 |
| NM_020410 | 1 | 0 | 1 | 0 | 0 | 0 |
| NM_020411 | 1 | 0 | 1 | 1 | 0 | 0 |
| NM_020412 | 1 | 1 | 1 | 1 | 1 | 0 |
| NM_020414 | 1 | 0 | 1 | 1 | 1 | 1 |
| NM_020415 | 1 | 1 | 1 | 1 | 0 | 1 |
| NM_020417 | 0 | 0 | 0 | 0 | 0 | 1 |
| NM_020418 | 1 | 1 | 1 | 1 | 0 | 1 |
| NM_020420 | 1 | 0 | 1 | 0 | 0 | 1 |
| NM_020421 | 1 | 0 | 1 | 0 | 0 | 1 |
| NM_020422 | 1 | 0 | 1 | 0 | 0 | 1 |
| NM_020423 | 1 | 1 | 1 | 1 | 0 | 1 |
| NM_020424 | 1 | 1 | 1 | 1 | 0 | 0 |
| NM_020425 | 1 | 0 | 1 | 0 | 0 | 1 |
| NM_020426 | 1 | 1 | 1 | 1 | 0 | 1 |
| NM_020427 | 1 | 0 | 1 | 0 | 0 | 1 |
| NM_020428 | 1 | 1 | 1 | 1 | 0 | 0 |
| NM_020429 | 1 | 0 | 1 | 0 | 0 | 1 |
| NM_020432 | 1 | 0 | 1 | 0 | 0 | 0 |
| NM_020433 | 1 | 1 | 1 | 1 | 0 | 0 |
| NM_020435 | 1 | 0 | 1 | 1 | 0 | 1 |
| NM_020437 | 1 | 0 | 1 | 1 | 0 | 0 |
| NM_020438 | 1 | 0 | 1 | 0 | 0 | 0 |
| NM_020439 | 1 | 0 | 1 | 0 | 0 | 0 |
| NM_020441 | 1 | 0 | 1 | 0 | 0 | 0 |
| NM_020442 | 1 | 0 | 1 | 0 | 0 | 0 |
| NM_020443 | 1 | 1 | 1 | 1 | 0 | 0 |
| NM_020444 | 1 | 1 | 1 | 1 | 0 | 1 |
| NM_020445 | 1 | 0 | 1 | 0 | 1 | 0 |
| NM_020447 | 1 | 0 | 1 | 0 | 0 | 0 |
| NM_020451 | 1 | 0 | 1 | 0 | 0 | 0 |
| NM_020453 | 1 | 0 | 1 | 0 | 0 | 0 |
| NM_020455 | 1 | 0 | 1 | 0 | 0 | 1 |
| NM_020456 | 1 | 0 | 1 | 0 | 1 | 1 |
| NM_020457 | 1 | 1 | 1 | 1 | 0 | 0 |
| NM_020461 | 1 | 0 | 1 | 1 | 0 | 0 |
| NM_020465 | 1 | 1 | 1 | 1 | 0 | 0 |
| NM_020466 | 1 | 0 | 1 | 0 | 0 | 0 |
| NM_020467 | 1 | 0 | 1 | 1 | 0 | 0 |
| NM_020468 | 1 | 0 | 1 | 0 | 1 | 0 |
| NM_020469 | 1 | 0 | 1 | 1 | 0 | 1 |
| NM_020470 | 1 | 1 | 1 | 1 | 0 | 0 |
| NM_020474 | 1 | 0 | 1 | 1 | 0 | 0 |
| NM_020475 | 1 | 0 | 1 | 0 | 0 | 0 |
| NM_020477 | 1 | 0 | 1 | 0 | 0 | 0 |
| NM_020478 | 1 | 0 | 0 | 0 | 0 | 0 |
| NM_020479 | 1 | 0 | 0 | 0 | 0 | 1 |
| NM_020480 | 1 | 1 | 1 | 1 | 0 | 0 |
| NM_020481 | 1 | 0 | 1 | 0 | 0 | 0 |

|           |   |   |   |   |   |   |
|-----------|---|---|---|---|---|---|
| NM_020482 | 1 | 0 | 1 | 1 | 0 | 0 |
| NM_020524 | 1 | 1 | 1 | 1 | 1 | 0 |
| NM_020526 | 1 | 1 | 1 | 1 | 0 | 0 |
| NM_020527 | 1 | 0 | 1 | 0 | 0 | 0 |
| NM_020528 | 1 | 0 | 1 | 0 | 0 | 0 |
| NM_020529 | 1 | 1 | 1 | 1 | 0 | 0 |
| NM_020530 | 1 | 0 | 1 | 1 | 1 | 1 |
| NM_020531 | 1 | 1 | 1 | 1 | 0 | 0 |
| NM_020532 | 1 | 0 | 1 | 1 | 0 | 0 |
| NM_020533 | 1 | 1 | 1 | 0 | 0 | 0 |
| NM_020535 | 1 | 1 | 1 | 1 | 1 | 0 |
| NM_020546 | 1 | 0 | 0 | 0 | 0 | 0 |
| NM_020547 | 1 | 0 | 0 | 0 | 0 | 1 |
| NM_020548 | 1 | 1 | 1 | 1 | 1 | 1 |
| NM_020550 | 1 | 0 | 1 | 1 | 0 | 0 |
| NM_020552 | 1 | 0 | 1 | 0 | 0 | 1 |
| NM_020554 | 0 | 1 | 0 | 1 | 0 | 0 |
| NM_020631 | 1 | 1 | 1 | 1 | 0 | 0 |
| NM_020632 | 1 | 0 | 1 | 1 | 1 | 1 |
| NM_020633 | 0 | 1 | 0 | 0 | 0 | 0 |
| NM_020634 | 1 | 0 | 1 | 0 | 0 | 0 |
| NM_020637 | 0 | 0 | 0 | 1 | 0 | 0 |
| NM_020639 | 1 | 1 | 1 | 1 | 0 | 0 |
| NM_020640 | 1 | 1 | 1 | 1 | 0 | 1 |
| NM_020642 | 1 | 1 | 1 | 1 | 0 | 0 |
| NM_020644 | 1 | 1 | 1 | 0 | 0 | 1 |
| NM_020645 | 1 | 0 | 1 | 0 | 1 | 1 |
| NM_020646 | 1 | 0 | 0 | 0 | 0 | 1 |
| NM_020647 | 1 | 0 | 1 | 0 | 0 | 0 |
| NM_020648 | 1 | 0 | 1 | 0 | 0 | 0 |
| NM_020649 | 1 | 1 | 1 | 0 | 0 | 0 |
| NM_020650 | 1 | 0 | 1 | 1 | 0 | 0 |
| NM_020651 | 1 | 0 | 1 | 1 | 0 | 0 |
| NM_020652 | 0 | 0 | 1 | 0 | 0 | 0 |
| NM_020653 | 1 | 0 | 0 | 0 | 1 | 0 |
| NM_020654 | 1 | 0 | 1 | 0 | 0 | 0 |
| NM_020655 | 1 | 0 | 1 | 0 | 0 | 0 |
| NM_020656 | 1 | 0 | 0 | 0 | 0 | 0 |
| NM_020657 | 1 | 0 | 1 | 1 | 0 | 0 |
| NM_020659 | 1 | 1 | 1 | 1 | 0 | 1 |
| NM_020661 | 1 | 1 | 1 | 1 | 0 | 1 |
| NM_020662 | 1 | 1 | 1 | 1 | 0 | 0 |
| NM_020663 | 0 | 0 | 0 | 1 | 0 | 0 |
| NM_020664 | 1 | 1 | 1 | 1 | 1 | 1 |
| NM_020665 | 1 | 1 | 1 | 1 | 0 | 1 |
| NM_020666 | 1 | 0 | 1 | 0 | 1 | 1 |
| NM_020667 | 1 | 1 | 1 | 1 | 1 | 1 |
| NM_020669 | 1 | 0 | 0 | 0 | 0 | 1 |
| NM_020673 | 1 | 0 | 1 | 0 | 1 | 1 |
| NM_020675 | 1 | 0 | 1 | 0 | 0 | 1 |
| NM_020676 | 0 | 0 | 1 | 0 | 0 | 0 |
| NM_020677 | 1 | 1 | 1 | 1 | 0 | 0 |

|           |   |   |   |   |   |   |
|-----------|---|---|---|---|---|---|
| NM_020678 | 1 | 1 | 1 | 1 | 0 | 1 |
| NM_020679 | 1 | 1 | 1 | 1 | 1 | 0 |
| NM_020680 | 1 | 1 | 1 | 1 | 0 | 0 |
| NM_020682 | 1 | 0 | 1 | 0 | 0 | 0 |
| NM_020684 | 1 | 0 | 1 | 0 | 0 | 1 |
| NM_020685 | 1 | 0 | 1 | 1 | 1 | 1 |
| NM_020686 | 1 | 1 | 1 | 1 | 0 | 1 |
| NM_020689 | 1 | 0 | 1 | 0 | 0 | 0 |
| NM_020690 | 1 | 0 | 1 | 0 | 0 | 0 |
| NM_020693 | 1 | 1 | 1 | 1 | 0 | 0 |
| NM_020695 | 1 | 1 | 0 | 0 | 0 | 1 |
| NM_020696 | 1 | 0 | 1 | 0 | 0 | 1 |
| NM_020698 | 1 | 1 | 1 | 1 | 0 | 1 |
| NM_020699 | 1 | 0 | 1 | 0 | 0 | 0 |
| NM_020701 | 1 | 0 | 1 | 0 | 0 | 0 |
| NM_020707 | 1 | 1 | 1 | 1 | 0 | 0 |
| NM_020710 | 1 | 1 | 1 | 1 | 0 | 0 |
| NM_020726 | 1 | 1 | 1 | 1 | 0 | 0 |
| NM_020727 | 1 | 0 | 1 | 1 | 0 | 0 |
| NM_020731 | 1 | 0 | 1 | 0 | 0 | 1 |
| NM_020732 | 1 | 0 | 1 | 0 | 0 | 0 |
| NM_020739 | 1 | 1 | 1 | 1 | 0 | 1 |
| NM_020740 | 1 | 0 | 1 | 0 | 0 | 0 |
| NM_020748 | 1 | 0 | 1 | 1 | 1 | 1 |
| NM_020749 | 1 | 1 | 1 | 1 | 0 | 0 |
| NM_020750 | 1 | 1 | 1 | 1 | 0 | 0 |
| NM_020751 | 1 | 0 | 1 | 0 | 0 | 0 |
| NM_020753 | 1 | 0 | 1 | 1 | 0 | 0 |
| NM_020755 | 1 | 1 | 1 | 1 | 0 | 1 |
| NM_020761 | 1 | 0 | 1 | 1 | 0 | 0 |
| NM_020764 | 1 | 1 | 0 | 0 | 0 | 0 |
| NM_020765 | 1 | 0 | 1 | 0 | 0 | 0 |
| NM_020769 | 1 | 0 | 1 | 0 | 0 | 0 |
| NM_020770 | 1 | 0 | 1 | 1 | 1 | 0 |
| NM_020771 | 1 | 0 | 1 | 0 | 0 | 0 |
| NM_020772 | 1 | 0 | 1 | 0 | 0 | 0 |
| NM_020773 | 1 | 0 | 1 | 1 | 0 | 0 |
| NM_020774 | 1 | 0 | 1 | 1 | 0 | 0 |
| NM_020775 | 1 | 1 | 1 | 1 | 1 | 1 |
| NM_020777 | 1 | 1 | 1 | 1 | 0 | 0 |
| NM_020778 | 1 | 0 | 1 | 1 | 0 | 0 |
| NM_020779 | 1 | 1 | 1 | 0 | 0 | 0 |
| NM_020781 | 1 | 0 | 1 | 0 | 0 | 1 |
| NM_020783 | 0 | 0 | 0 | 0 | 0 | 1 |
| NM_020789 | 1 | 0 | 1 | 0 | 0 | 0 |
| NM_020792 | 1 | 1 | 1 | 1 | 0 | 0 |
| NM_020794 | 1 | 0 | 1 | 0 | 0 | 0 |
| NM_020795 | 1 | 1 | 1 | 1 | 0 | 1 |
| NM_020796 | 1 | 0 | 1 | 0 | 0 | 0 |
| NM_020799 | 1 | 1 | 1 | 1 | 0 | 0 |
| NM_020801 | 1 | 1 | 1 | 1 | 1 | 1 |
| NM_020803 | 1 | 1 | 1 | 1 | 0 | 0 |

|           |   |   |   |   |   |   |
|-----------|---|---|---|---|---|---|
| NM_020804 | 1 | 1 | 1 | 1 | 0 | 0 |
| NM_020806 | 1 | 0 | 1 | 1 | 0 | 0 |
| NM_020813 | 1 | 1 | 1 | 1 | 1 | 0 |
| NM_020817 | 1 | 1 | 1 | 1 | 1 | 1 |
| NM_020819 | 1 | 0 | 1 | 0 | 0 | 0 |
| NM_020820 | 1 | 1 | 1 | 1 | 0 | 0 |
| NM_020824 | 1 | 1 | 1 | 1 | 0 | 0 |
| NM_020826 | 1 | 0 | 1 | 0 | 0 | 0 |
| NM_020828 | 1 | 0 | 1 | 1 | 1 | 1 |
| NM_020830 | 1 | 1 | 1 | 1 | 0 | 0 |
| NM_020831 | 1 | 0 | 1 | 0 | 0 | 0 |
| NM_020832 | 1 | 1 | 1 | 1 | 1 | 0 |
| NM_020834 | 1 | 0 | 0 | 0 | 0 | 1 |
| NM_020836 | 1 | 0 | 1 | 0 | 0 | 1 |
| NM_020839 | 1 | 1 | 1 | 0 | 0 | 0 |
| NM_020841 | 1 | 1 | 1 | 0 | 0 | 0 |
| NM_020843 | 1 | 1 | 1 | 1 | 1 | 1 |
| NM_020845 | 1 | 1 | 1 | 1 | 0 | 0 |
| NM_020847 | 1 | 0 | 1 | 0 | 0 | 0 |
| NM_020854 | 1 | 0 | 1 | 0 | 0 | 0 |
| NM_020856 | 1 | 0 | 1 | 0 | 0 | 0 |
| NM_020859 | 1 | 0 | 1 | 0 | 0 | 0 |
| NM_020860 | 1 | 0 | 1 | 0 | 1 | 1 |
| NM_020861 | 1 | 0 | 1 | 0 | 0 | 0 |
| NM_020865 | 1 | 0 | 1 | 0 | 0 | 0 |
| NM_020866 | 1 | 1 | 0 | 0 | 0 | 1 |
| NM_020868 | 0 | 0 | 0 | 0 | 0 | 1 |
| NM_020870 | 1 | 1 | 1 | 1 | 0 | 0 |
| NM_020871 | 1 | 0 | 1 | 0 | 0 | 0 |
| NM_020873 | 1 | 0 | 1 | 1 | 1 | 1 |
| NM_020880 | 1 | 0 | 1 | 1 | 0 | 0 |
| NM_020886 | 1 | 0 | 1 | 0 | 0 | 0 |
| NM_020890 | 1 | 0 | 1 | 0 | 0 | 0 |
| NM_020892 | 1 | 0 | 1 | 1 | 0 | 0 |
| NM_020895 | 1 | 0 | 1 | 0 | 1 | 1 |
| NM_020896 | 1 | 0 | 1 | 0 | 1 | 1 |
| NM_020898 | 1 | 1 | 1 | 1 | 0 | 0 |
| NM_020899 | 1 | 1 | 1 | 1 | 0 | 0 |
| NM_020904 | 1 | 0 | 1 | 1 | 0 | 0 |
| NM_020905 | 1 | 1 | 1 | 1 | 0 | 0 |
| NM_020909 | 1 | 0 | 1 | 0 | 0 | 1 |
| NM_020919 | 1 | 1 | 1 | 1 | 0 | 0 |
| NM_020921 | 1 | 0 | 1 | 0 | 1 | 0 |
| NM_020922 | 1 | 0 | 1 | 0 | 0 | 1 |
| NM_020924 | 1 | 0 | 1 | 1 | 0 | 0 |
| NM_020925 | 1 | 1 | 1 | 1 | 0 | 0 |
| NM_020926 | 1 | 1 | 1 | 1 | 1 | 1 |
| NM_020932 | 1 | 0 | 1 | 1 | 0 | 1 |
| NM_020933 | 1 | 1 | 1 | 1 | 0 | 0 |
| NM_020935 | 1 | 0 | 1 | 0 | 1 | 1 |
| NM_020939 | 1 | 1 | 1 | 1 | 0 | 0 |
| NM_020944 | 1 | 0 | 1 | 1 | 0 | 1 |

|           |   |   |   |   |   |   |
|-----------|---|---|---|---|---|---|
| NM_020948 | 1 | 0 | 1 | 1 | 0 | 0 |
| NM_020951 | 1 | 0 | 1 | 1 | 0 | 0 |
| NM_020956 | 1 | 0 | 1 | 0 | 0 | 0 |
| NM_020957 | 1 | 1 | 1 | 1 | 0 | 0 |
| NM_020958 | 0 | 0 | 0 | 1 | 0 | 0 |
| NM_020960 | 1 | 1 | 1 | 1 | 0 | 0 |
| NM_020961 | 1 | 0 | 1 | 0 | 0 | 1 |
| NM_020962 | 1 | 0 | 0 | 0 | 0 | 1 |
| NM_020963 | 1 | 1 | 1 | 1 | 1 | 1 |
| NM_020967 | 1 | 0 | 1 | 1 | 0 | 0 |
| NM_020973 | 1 | 0 | 1 | 0 | 0 | 0 |
| NM_020978 | 1 | 0 | 1 | 0 | 1 | 1 |
| NM_020979 | 1 | 1 | 1 | 1 | 0 | 1 |
| NM_020980 | 1 | 1 | 1 | 1 | 1 | 1 |
| NM_020981 | 1 | 0 | 1 | 0 | 0 | 0 |
| NM_020982 | 0 | 0 | 1 | 0 | 0 | 0 |
| NM_020983 | 1 | 0 | 1 | 0 | 0 | 0 |
| NM_020987 | 1 | 1 | 1 | 1 | 1 | 0 |
| NM_020988 | 1 | 0 | 1 | 0 | 0 | 1 |
| NM_020989 | 0 | 0 | 0 | 0 | 0 | 1 |
| NM_020990 | 1 | 1 | 1 | 0 | 0 | 0 |
| NM_020991 | 0 | 0 | 0 | 0 | 0 | 1 |
| NM_020992 | 1 | 0 | 1 | 0 | 0 | 0 |
| NM_020993 | 1 | 1 | 1 | 1 | 1 | 1 |
| NM_020994 | 1 | 0 | 1 | 0 | 0 | 0 |
| NM_020995 | 1 | 0 | 1 | 0 | 0 | 0 |
| NM_020997 | 1 | 0 | 1 | 0 | 0 | 1 |
| NM_020998 | 1 | 0 | 1 | 1 | 1 | 1 |
| NM_020999 | 1 | 0 | 1 | 0 | 0 | 0 |
| NM_021000 | 1 | 0 | 1 | 0 | 0 | 0 |
| NM_021002 | 1 | 0 | 1 | 0 | 0 | 0 |
| NM_021003 | 1 | 1 | 1 | 1 | 1 | 1 |
| NM_021004 | 1 | 1 | 1 | 1 | 1 | 0 |
| NM_021005 | 0 | 0 | 1 | 0 | 0 | 0 |
| NM_021006 | 1 | 0 | 1 | 1 | 0 | 0 |
| NM_021008 | 1 | 1 | 1 | 1 | 1 | 0 |
| NM_021009 | 1 | 1 | 1 | 1 | 0 | 1 |
| NM_021013 | 0 | 0 | 0 | 0 | 0 | 1 |
| NM_021014 | 1 | 0 | 0 | 0 | 0 | 0 |
| NM_021016 | 0 | 0 | 0 | 0 | 0 | 1 |
| NM_021018 | 1 | 0 | 1 | 0 | 0 | 0 |
| NM_021019 | 1 | 0 | 1 | 0 | 1 | 0 |
| NM_021020 | 1 | 0 | 1 | 1 | 0 | 1 |
| NM_021021 | 1 | 1 | 1 | 1 | 0 | 0 |
| NM_021023 | 1 | 0 | 1 | 0 | 1 | 0 |
| NM_021025 | 1 | 0 | 1 | 0 | 0 | 0 |
| NM_021026 | 1 | 1 | 1 | 0 | 0 | 0 |
| NM_021027 | 1 | 0 | 1 | 1 | 0 | 1 |
| NM_021030 | 1 | 0 | 1 | 0 | 0 | 0 |
| NM_021032 | 0 | 1 | 1 | 0 | 0 | 0 |
| NM_021033 | 1 | 0 | 1 | 0 | 0 | 0 |
| NM_021034 | 1 | 1 | 1 | 1 | 0 | 0 |

|           |   |   |   |   |   |   |
|-----------|---|---|---|---|---|---|
| NM_021035 | 1 | 1 | 1 | 1 | 0 | 0 |
| NM_021038 | 1 | 0 | 1 | 0 | 0 | 0 |
| NM_021039 | 1 | 1 | 1 | 1 | 1 | 1 |
| NM_021044 | 1 | 0 | 1 | 0 | 0 | 0 |
| NM_021045 | 1 | 1 | 1 | 1 | 1 | 1 |
| NM_021046 | 1 | 1 | 1 | 0 | 0 | 0 |
| NM_021047 | 1 | 0 | 1 | 0 | 0 | 0 |
| NM_021048 | 1 | 1 | 1 | 1 | 0 | 1 |
| NM_021049 | 1 | 0 | 1 | 1 | 0 | 0 |
| NM_021052 | 1 | 0 | 1 | 0 | 0 | 0 |
| NM_021055 | 1 | 0 | 1 | 0 | 1 | 1 |
| NM_021057 | 1 | 0 | 1 | 0 | 0 | 0 |
| NM_021058 | 0 | 0 | 0 | 0 | 0 | 1 |
| NM_021059 | 1 | 1 | 1 | 1 | 0 | 0 |
| NM_021062 | 1 | 0 | 1 | 0 | 0 | 0 |
| NM_021063 | 1 | 1 | 1 | 1 | 0 | 0 |
| NM_021064 | 1 | 0 | 1 | 0 | 0 | 1 |
| NM_021065 | 1 | 1 | 1 | 1 | 1 | 1 |
| NM_021066 | 1 | 0 | 1 | 0 | 0 | 0 |
| NM_021069 | 1 | 0 | 1 | 0 | 1 | 0 |
| NM_021070 | 1 | 1 | 1 | 1 | 0 | 1 |
| NM_021071 | 0 | 0 | 0 | 1 | 0 | 0 |
| NM_021072 | 1 | 0 | 0 | 0 | 0 | 1 |
| NM_021074 | 1 | 0 | 1 | 0 | 0 | 1 |
| NM_021075 | 1 | 1 | 1 | 1 | 0 | 0 |
| NM_021076 | 1 | 0 | 1 | 0 | 0 | 1 |
| NM_021077 | 1 | 0 | 1 | 1 | 1 | 0 |
| NM_021078 | 1 | 1 | 1 | 1 | 0 | 1 |
| NM_021079 | 1 | 0 | 1 | 0 | 0 | 0 |
| NM_021080 | 1 | 0 | 1 | 0 | 0 | 0 |
| NM_021081 | 1 | 0 | 1 | 0 | 0 | 0 |
| NM_021082 | 1 | 0 | 1 | 0 | 0 | 1 |
| NM_021083 | 1 | 1 | 1 | 0 | 0 | 1 |
| NM_021088 | 1 | 0 | 1 | 0 | 0 | 0 |
| NM_021089 | 1 | 0 | 1 | 0 | 0 | 0 |
| NM_021090 | 1 | 1 | 1 | 1 | 1 | 1 |
| NM_021092 | 1 | 0 | 1 | 1 | 0 | 0 |
| NM_021093 | 1 | 1 | 1 | 0 | 0 | 0 |
| NM_021094 | 0 | 0 | 0 | 0 | 0 | 1 |
| NM_021095 | 1 | 0 | 1 | 1 | 0 | 1 |
| NM_021096 | 1 | 0 | 1 | 0 | 0 | 0 |
| NM_021097 | 1 | 0 | 1 | 0 | 0 | 1 |
| NM_021098 | 1 | 0 | 1 | 0 | 0 | 0 |
| NM_021100 | 1 | 0 | 1 | 1 | 0 | 0 |
| NM_021102 | 1 | 1 | 1 | 1 | 0 | 0 |
| NM_021103 | 1 | 1 | 1 | 1 | 1 | 1 |
| NM_021104 | 0 | 1 | 0 | 0 | 0 | 0 |
| NM_021105 | 1 | 1 | 1 | 1 | 0 | 0 |
| NM_021106 | 1 | 0 | 1 | 1 | 1 | 1 |
| NM_021107 | 1 | 0 | 1 | 0 | 0 | 0 |
| NM_021109 | 1 | 1 | 1 | 1 | 0 | 0 |
| NM_021111 | 1 | 0 | 1 | 1 | 0 | 0 |



|           |   |   |   |   |   |   |
|-----------|---|---|---|---|---|---|
| NM_021114 | 1 | 1 | 1 | 1 | 1 | 1 |
| NM_021115 | 1 | 0 | 0 | 0 | 0 | 1 |
| NM_021116 | 1 | 0 | 1 | 0 | 0 | 1 |
| NM_021117 | 1 | 1 | 1 | 1 | 1 | 0 |
| NM_021120 | 1 | 0 | 1 | 0 | 0 | 0 |
| NM_021122 | 1 | 0 | 1 | 0 | 0 | 0 |
| NM_021123 | 1 | 0 | 1 | 1 | 0 | 0 |
| NM_021126 | 1 | 1 | 1 | 1 | 1 | 1 |
| NM_021127 | 1 | 1 | 1 | 1 | 1 | 1 |
| NM_021128 | 1 | 1 | 1 | 1 | 1 | 0 |
| NM_021129 | 1 | 0 | 1 | 1 | 0 | 0 |
| NM_021130 | 1 | 0 | 1 | 0 | 0 | 1 |
| NM_021131 | 1 | 0 | 1 | 0 | 0 | 0 |
| NM_021132 | 1 | 0 | 1 | 1 | 0 | 0 |
| NM_021133 | 1 | 1 | 1 | 1 | 1 | 1 |
| NM_021134 | 1 | 1 | 1 | 1 | 0 | 0 |
| NM_021135 | 1 | 1 | 1 | 1 | 0 | 0 |
| NM_021136 | 1 | 1 | 1 | 1 | 0 | 1 |
| NM_021137 | 1 | 0 | 1 | 0 | 1 | 1 |
| NM_021139 | 0 | 1 | 0 | 1 | 0 | 1 |
| NM_021140 | 1 | 1 | 1 | 1 | 0 | 0 |
| NM_021141 | 1 | 0 | 1 | 0 | 0 | 1 |
| NM_021143 | 1 | 0 | 1 | 0 | 0 | 0 |
| NM_021144 | 1 | 1 | 1 | 1 | 1 | 0 |
| NM_021145 | 1 | 0 | 1 | 0 | 0 | 0 |
| NM_021146 | 1 | 0 | 0 | 0 | 0 | 1 |
| NM_021147 | 1 | 0 | 0 | 0 | 0 | 1 |
| NM_021151 | 1 | 0 | 1 | 0 | 0 | 0 |
| NM_021154 | 0 | 1 | 1 | 1 | 0 | 0 |
| NM_021155 | 1 | 1 | 1 | 1 | 0 | 1 |
| NM_021156 | 1 | 1 | 1 | 1 | 0 | 0 |
| NM_021158 | 1 | 1 | 1 | 1 | 0 | 0 |
| NM_021159 | 1 | 1 | 1 | 0 | 0 | 1 |
| NM_021160 | 1 | 1 | 1 | 1 | 0 | 0 |
| NM_021161 | 1 | 0 | 1 | 0 | 0 | 1 |
| NM_021163 | 1 | 0 | 1 | 1 | 0 | 0 |
| NM_021164 | 1 | 0 | 1 | 0 | 0 | 0 |
| NM_021165 | 1 | 1 | 1 | 1 | 0 | 0 |
| NM_021167 | 1 | 1 | 1 | 1 | 0 | 0 |
| NM_021168 | 1 | 0 | 1 | 0 | 0 | 1 |
| NM_021170 | 1 | 0 | 1 | 1 | 1 | 1 |
| NM_021173 | 1 | 0 | 1 | 0 | 0 | 1 |
| NM_021174 | 1 | 1 | 1 | 1 | 0 | 0 |
| NM_021175 | 1 | 0 | 1 | 0 | 0 | 0 |
| NM_021176 | 1 | 1 | 1 | 1 | 0 | 1 |
| NM_021177 | 1 | 0 | 1 | 1 | 0 | 1 |
| NM_021179 | 1 | 0 | 1 | 0 | 0 | 1 |
| NM_021180 | 1 | 1 | 1 | 0 | 0 | 1 |
| NM_021181 | 1 | 1 | 1 | 1 | 0 | 0 |
| NM_021182 | 1 | 0 | 0 | 0 | 0 | 1 |
| NM_021183 | 1 | 0 | 1 | 0 | 1 | 1 |
| NM_021184 | 1 | 0 | 1 | 1 | 1 | 0 |

|           |   |   |   |   |   |   |
|-----------|---|---|---|---|---|---|
| NM_021185 | 1 | 0 | 1 | 0 | 1 | 0 |
| NM_021186 | 0 | 0 | 1 | 0 | 0 | 1 |
| NM_021187 | 1 | 1 | 1 | 1 | 1 | 1 |
| NM_021188 | 1 | 0 | 1 | 0 | 0 | 0 |
| NM_021189 | 1 | 0 | 1 | 0 | 0 | 0 |
| NM_021190 | 1 | 1 | 1 | 0 | 1 | 0 |
| NM_021191 | 1 | 1 | 1 | 0 | 0 | 0 |
| NM_021192 | 0 | 0 | 0 | 0 | 0 | 1 |
| NM_021193 | 0 | 0 | 0 | 1 | 0 | 0 |
| NM_021194 | 1 | 1 | 1 | 0 | 0 | 0 |
| NM_021195 | 1 | 0 | 1 | 1 | 1 | 0 |
| NM_021196 | 1 | 0 | 1 | 0 | 0 | 1 |
| NM_021197 | 1 | 0 | 0 | 0 | 0 | 0 |
| NM_021198 | 1 | 0 | 1 | 0 | 0 | 0 |
| NM_021199 | 1 | 1 | 1 | 1 | 1 | 1 |
| NM_021200 | 1 | 1 | 1 | 0 | 0 | 1 |
| NM_021201 | 1 | 1 | 1 | 0 | 1 | 1 |
| NM_021203 | 1 | 1 | 1 | 1 | 0 | 0 |
| NM_021204 | 1 | 0 | 1 | 0 | 0 | 0 |
| NM_021205 | 1 | 1 | 1 | 1 | 0 | 0 |
| NM_021208 | 0 | 0 | 0 | 0 | 0 | 1 |
| NM_021209 | 1 | 1 | 1 | 1 | 0 | 1 |
| NM_021210 | 1 | 1 | 1 | 1 | 0 | 0 |
| NM_021211 | 1 | 0 | 1 | 0 | 1 | 0 |
| NM_021212 | 1 | 1 | 1 | 1 | 0 | 0 |
| NM_021213 | 1 | 1 | 1 | 1 | 0 | 1 |
| NM_021216 | 1 | 1 | 1 | 1 | 0 | 0 |
| NM_021217 | 1 | 0 | 1 | 1 | 1 | 0 |
| NM_021218 | 1 | 0 | 1 | 0 | 0 | 0 |
| NM_021221 | 1 | 0 | 1 | 0 | 1 | 0 |
| NM_021222 | 1 | 1 | 1 | 1 | 0 | 0 |
| NM_021223 | 1 | 0 | 1 | 0 | 0 | 0 |
| NM_021224 | 1 | 0 | 1 | 1 | 0 | 0 |
| NM_021225 | 0 | 0 | 0 | 0 | 0 | 1 |
| NM_021226 | 1 | 0 | 1 | 0 | 0 | 1 |
| NM_021227 | 1 | 1 | 1 | 1 | 1 | 1 |
| NM_021228 | 1 | 0 | 1 | 0 | 0 | 0 |
| NM_021229 | 1 | 1 | 1 | 1 | 1 | 1 |
| NM_021230 | 1 | 0 | 1 | 0 | 0 | 0 |
| NM_021232 | 1 | 1 | 1 | 1 | 0 | 0 |
| NM_021233 | 0 | 0 | 0 | 0 | 0 | 1 |
| NM_021235 | 1 | 0 | 1 | 1 | 0 | 1 |
| NM_021237 | 1 | 1 | 1 | 1 | 0 | 1 |
| NM_021238 | 1 | 1 | 1 | 1 | 1 | 1 |
| NM_021242 | 1 | 0 | 1 | 1 | 1 | 1 |
| NM_021244 | 1 | 0 | 1 | 0 | 0 | 0 |
| NM_021245 | 1 | 0 | 1 | 0 | 0 | 0 |
| NM_021246 | 1 | 1 | 1 | 1 | 0 | 0 |
| NM_021248 | 1 | 0 | 1 | 0 | 0 | 0 |
| NM_021249 | 1 | 0 | 1 | 0 | 0 | 0 |
| NM_021250 | 1 | 1 | 1 | 1 | 0 | 1 |
| NM_021252 | 1 | 0 | 1 | 0 | 0 | 0 |

|           |   |   |   |   |   |   |
|-----------|---|---|---|---|---|---|
| NM_021253 | 1 | 1 | 1 | 1 | 1 | 1 |
| NM_021255 | 1 | 1 | 1 | 1 | 1 | 1 |
| NM_021257 | 1 | 1 | 1 | 1 | 0 | 0 |
| NM_021258 | 1 | 0 | 1 | 1 | 0 | 0 |
| NM_021259 | 1 | 0 | 1 | 1 | 0 | 0 |
| NM_021260 | 1 | 1 | 1 | 1 | 0 | 1 |
| NM_021267 | 0 | 0 | 0 | 0 | 0 | 1 |
| NM_021268 | 0 | 0 | 1 | 0 | 0 | 0 |
| NM_021270 | 1 | 1 | 1 | 1 | 0 | 1 |
| NM_021570 | 0 | 0 | 0 | 0 | 0 | 1 |
| NM_021571 | 1 | 0 | 1 | 0 | 0 | 0 |
| NM_021572 | 1 | 0 | 1 | 0 | 0 | 1 |
| NM_021575 | 1 | 1 | 1 | 1 | 0 | 0 |
| NM_021599 | 1 | 0 | 1 | 1 | 0 | 0 |
| NM_021601 | 1 | 0 | 1 | 0 | 0 | 0 |
| NM_021602 | 1 | 0 | 1 | 0 | 0 | 1 |
| NM_021603 | 1 | 1 | 1 | 0 | 0 | 0 |
| NM_021614 | 1 | 0 | 1 | 0 | 0 | 0 |
| NM_021615 | 1 | 0 | 1 | 0 | 0 | 1 |
| NM_021616 | 1 | 1 | 1 | 0 | 0 | 0 |
| NM_021620 | 1 | 0 | 1 | 0 | 0 | 1 |
| NM_021622 | 1 | 0 | 1 | 1 | 1 | 1 |
| NM_021624 | 1 | 1 | 1 | 1 | 0 | 0 |
| NM_021626 | 1 | 1 | 1 | 1 | 1 | 1 |
| NM_021627 | 1 | 0 | 1 | 1 | 0 | 0 |
| NM_021628 | 1 | 0 | 1 | 1 | 0 | 0 |
| NM_021629 | 1 | 1 | 1 | 1 | 1 | 1 |
| NM_021630 | 1 | 0 | 1 | 1 | 1 | 1 |
| NM_021631 | 1 | 0 | 1 | 0 | 0 | 1 |
| NM_021632 | 1 | 1 | 1 | 1 | 0 | 0 |
| NM_021633 | 1 | 0 | 1 | 0 | 0 | 1 |
| NM_021634 | 0 | 0 | 0 | 0 | 0 | 1 |
| NM_021637 | 0 | 0 | 0 | 0 | 0 | 1 |
| NM_021638 | 1 | 1 | 1 | 0 | 0 | 0 |
| NM_021639 | 1 | 0 | 1 | 0 | 0 | 1 |
| NM_021640 | 1 | 0 | 1 | 0 | 0 | 1 |
| NM_021641 | 1 | 0 | 1 | 0 | 0 | 0 |
| NM_021642 | 1 | 1 | 1 | 1 | 1 | 1 |
| NM_021643 | 1 | 1 | 1 | 1 | 0 | 0 |
| NM_021645 | 1 | 0 | 1 | 0 | 1 | 1 |
| NM_021647 | 1 | 1 | 1 | 1 | 0 | 0 |
| NM_021648 | 1 | 1 | 1 | 1 | 0 | 0 |
| NM_021649 | 1 | 1 | 1 | 1 | 0 | 0 |
| NM_021705 | 1 | 1 | 1 | 1 | 0 | 0 |
| NM_021706 | 1 | 1 | 1 | 1 | 0 | 1 |
| NM_021708 | 1 | 0 | 1 | 0 | 0 | 0 |
| NM_021709 | 1 | 1 | 1 | 1 | 0 | 0 |
| NM_021722 | 1 | 0 | 0 | 1 | 0 | 0 |
| NM_021724 | 1 | 0 | 1 | 0 | 0 | 0 |
| NM_021727 | 1 | 0 | 1 | 1 | 0 | 0 |
| NM_021729 | 1 | 0 | 1 | 0 | 0 | 0 |
| NM_021731 | 1 | 1 | 1 | 1 | 0 | 1 |

|           |   |   |   |   |   |   |
|-----------|---|---|---|---|---|---|
| NM_021732 | 1 | 1 | 1 | 0 | 0 | 1 |
| NM_021733 | 1 | 0 | 1 | 0 | 0 | 0 |
| NM_021734 | 1 | 1 | 1 | 1 | 1 | 1 |
| NM_021738 | 1 | 0 | 1 | 1 | 1 | 1 |
| NM_021777 | 1 | 0 | 1 | 1 | 0 | 0 |
| NM_021778 | 1 | 0 | 1 | 1 | 1 | 1 |
| NM_021779 | 1 | 0 | 1 | 0 | 0 | 0 |
| NM_021780 | 0 | 0 | 0 | 0 | 0 | 1 |
| NM_021783 | 1 | 0 | 0 | 0 | 0 | 0 |
| NM_021785 | 1 | 1 | 1 | 1 | 0 | 0 |
| NM_021794 | 1 | 0 | 1 | 0 | 0 | 0 |
| NM_021795 | 1 | 1 | 1 | 1 | 0 | 0 |
| NM_021796 | 0 | 0 | 0 | 0 | 0 | 1 |
| NM_021797 | 1 | 0 | 1 | 1 | 0 | 0 |
| NM_021800 | 1 | 0 | 1 | 0 | 0 | 0 |
| NM_021803 | 1 | 0 | 1 | 0 | 0 | 0 |
| NM_021804 | 1 | 0 | 0 | 0 | 0 | 1 |
| NM_021805 | 1 | 0 | 1 | 0 | 1 | 1 |
| NM_021806 | 1 | 0 | 1 | 1 | 0 | 0 |
| NM_021807 | 1 | 0 | 1 | 1 | 0 | 0 |
| NM_021808 | 0 | 0 | 0 | 0 | 0 | 1 |
| NM_021809 | 1 | 1 | 1 | 1 | 0 | 0 |
| NM_021810 | 1 | 0 | 1 | 1 | 0 | 1 |
| NM_021813 | 1 | 1 | 1 | 1 | 1 | 1 |
| NM_021814 | 1 | 0 | 1 | 1 | 0 | 1 |
| NM_021815 | 0 | 0 | 1 | 0 | 0 | 0 |
| NM_021817 | 1 | 1 | 1 | 1 | 0 | 0 |
| NM_021818 | 1 | 0 | 1 | 1 | 1 | 1 |
| NM_021819 | 1 | 0 | 1 | 0 | 0 | 0 |
| NM_021820 | 1 | 1 | 1 | 1 | 0 | 0 |
| NM_021821 | 1 | 0 | 1 | 1 | 0 | 0 |
| NM_021822 | 1 | 1 | 1 | 1 | 0 | 1 |
| NM_021823 | 1 | 1 | 1 | 1 | 1 | 1 |
| NM_021824 | 1 | 0 | 1 | 1 | 0 | 0 |
| NM_021825 | 1 | 0 | 1 | 1 | 0 | 0 |
| NM_021826 | 1 | 1 | 1 | 0 | 0 | 0 |
| NM_021827 | 1 | 0 | 1 | 0 | 0 | 1 |
| NM_021830 | 1 | 1 | 1 | 1 | 0 | 1 |
| NM_021831 | 1 | 0 | 1 | 1 | 0 | 0 |
| NM_021833 | 1 | 0 | 1 | 0 | 0 | 1 |
| NM_021870 | 1 | 0 | 0 | 0 | 0 | 0 |
| NM_021871 | 1 | 0 | 0 | 0 | 0 | 0 |
| NM_021902 | 1 | 0 | 1 | 0 | 0 | 1 |
| NM_021905 | 1 | 0 | 1 | 1 | 0 | 0 |
| NM_021907 | 1 | 1 | 1 | 1 | 0 | 0 |
| NM_021908 | 0 | 1 | 0 | 0 | 0 | 0 |
| NM_021910 | 1 | 0 | 1 | 0 | 0 | 0 |
| NM_021911 | 1 | 0 | 1 | 1 | 0 | 0 |
| NM_021912 | 1 | 0 | 1 | 0 | 0 | 0 |
| NM_021913 | 1 | 0 | 1 | 0 | 0 | 0 |
| NM_021914 | 1 | 0 | 1 | 0 | 0 | 0 |
| NM_021916 | 1 | 0 | 1 | 0 | 1 | 1 |

|           |   |   |   |   |   |   |
|-----------|---|---|---|---|---|---|
| NM_021920 | 1 | 0 | 1 | 0 | 0 | 0 |
| NM_021922 | 1 | 1 | 1 | 1 | 0 | 0 |
| NM_021923 | 1 | 0 | 1 | 1 | 0 | 1 |
| NM_021924 | 1 | 0 | 1 | 1 | 0 | 1 |
| NM_021925 | 1 | 0 | 1 | 1 | 1 | 1 |
| NM_021926 | 1 | 0 | 1 | 0 | 0 | 0 |
| NM_021927 | 1 | 0 | 1 | 0 | 0 | 0 |
| NM_021928 | 1 | 1 | 1 | 1 | 0 | 0 |
| NM_021929 | 1 | 0 | 1 | 0 | 1 | 1 |
| NM_021930 | 1 | 0 | 1 | 1 | 1 | 0 |
| NM_021931 | 1 | 0 | 1 | 0 | 1 | 1 |
| NM_021932 | 1 | 0 | 1 | 0 | 0 | 1 |
| NM_021933 | 1 | 0 | 1 | 0 | 1 | 1 |
| NM_021934 | 1 | 1 | 1 | 1 | 0 | 0 |
| NM_021935 | 1 | 0 | 1 | 0 | 0 | 0 |
| NM_021937 | 1 | 0 | 1 | 0 | 0 | 0 |
| NM_021938 | 1 | 0 | 0 | 0 | 0 | 0 |
| NM_021939 | 1 | 0 | 1 | 1 | 1 | 1 |
| NM_021940 | 1 | 1 | 1 | 1 | 0 | 1 |
| NM_021941 | 1 | 1 | 1 | 0 | 0 | 0 |
| NM_021942 | 1 | 0 | 1 | 0 | 1 | 0 |
| NM_021943 | 1 | 0 | 1 | 1 | 1 | 1 |
| NM_021944 | 1 | 0 | 1 | 1 | 0 | 0 |
| NM_021945 | 1 | 1 | 1 | 1 | 0 | 0 |
| NM_021946 | 1 | 0 | 1 | 1 | 1 | 1 |
| NM_021947 | 1 | 0 | 1 | 0 | 0 | 1 |
| NM_021949 | 0 | 0 | 1 | 0 | 0 | 0 |
| NM_021952 | 1 | 1 | 1 | 1 | 0 | 0 |
| NM_021953 | 1 | 0 | 1 | 0 | 0 | 0 |
| NM_021954 | 1 | 0 | 1 | 0 | 0 | 0 |
| NM_021955 | 1 | 0 | 1 | 0 | 0 | 1 |
| NM_021957 | 1 | 0 | 1 | 0 | 1 | 0 |
| NM_021958 | 1 | 1 | 1 | 1 | 1 | 1 |
| NM_021959 | 1 | 1 | 1 | 1 | 0 | 1 |
| NM_021963 | 1 | 0 | 1 | 1 | 1 | 1 |
| NM_021964 | 1 | 1 | 1 | 1 | 0 | 0 |
| NM_021965 | 1 | 0 | 1 | 0 | 0 | 1 |
| NM_021966 | 1 | 1 | 1 | 1 | 0 | 0 |
| NM_021967 | 1 | 0 | 1 | 1 | 0 | 0 |
| NM_021968 | 1 | 1 | 1 | 1 | 0 | 1 |
| NM_021970 | 1 | 1 | 1 | 1 | 0 | 0 |
| NM_021972 | 1 | 1 | 1 | 1 | 0 | 0 |
| NM_021973 | 0 | 0 | 1 | 1 | 0 | 0 |
| NM_021974 | 1 | 0 | 1 | 0 | 1 | 1 |
| NM_021975 | 1 | 1 | 1 | 1 | 0 | 1 |
| NM_021976 | 1 | 0 | 1 | 0 | 0 | 0 |
| NM_021978 | 1 | 1 | 1 | 1 | 1 | 1 |
| NM_021979 | 1 | 0 | 1 | 0 | 0 | 0 |
| NM_021980 | 1 | 0 | 1 | 1 | 0 | 0 |
| NM_021983 | 1 | 1 | 1 | 0 | 0 | 1 |
| NM_021987 | 0 | 0 | 0 | 0 | 0 | 1 |
| NM_021992 | 1 | 0 | 1 | 1 | 0 | 0 |

|           |   |   |   |   |   |   |
|-----------|---|---|---|---|---|---|
| NM_021994 | 1 | 0 | 1 | 1 | 1 | 1 |
| NM_021996 | 1 | 1 | 1 | 1 | 0 | 0 |
| NM_021998 | 1 | 0 | 1 | 0 | 0 | 0 |
| NM_021999 | 1 | 1 | 1 | 1 | 0 | 0 |
| NM_022001 | 1 | 0 | 1 | 0 | 0 | 1 |
| NM_022003 | 1 | 0 | 1 | 1 | 1 | 1 |
| NM_022006 | 1 | 1 | 1 | 1 | 0 | 0 |
| NM_022034 | 1 | 1 | 1 | 1 | 0 | 1 |
| NM_022039 | 1 | 0 | 1 | 0 | 0 | 0 |
| NM_022041 | 1 | 0 | 1 | 0 | 0 | 0 |
| NM_022042 | 1 | 0 | 1 | 0 | 0 | 1 |
| NM_022044 | 1 | 1 | 1 | 1 | 1 | 1 |
| NM_022045 | 1 | 0 | 1 | 0 | 1 | 1 |
| NM_022046 | 1 | 1 | 1 | 1 | 0 | 0 |
| NM_022047 | 1 | 1 | 1 | 1 | 0 | 1 |
| NM_022048 | 1 | 0 | 1 | 0 | 0 | 1 |
| NM_022050 | 1 | 1 | 1 | 1 | 0 | 0 |
| NM_022051 | 1 | 0 | 1 | 1 | 1 | 1 |
| NM_022052 | 1 | 0 | 0 | 0 | 0 | 1 |
| NM_022053 | 1 | 0 | 1 | 1 | 0 | 0 |
| NM_022054 | 1 | 1 | 1 | 1 | 1 | 0 |
| NM_022055 | 1 | 0 | 1 | 0 | 0 | 0 |
| NM_022058 | 1 | 0 | 1 | 0 | 0 | 1 |
| NM_022059 | 1 | 1 | 1 | 1 | 0 | 0 |
| NM_022060 | 1 | 1 | 1 | 1 | 0 | 1 |
| NM_022061 | 0 | 0 | 1 | 0 | 0 | 0 |
| NM_022063 | 1 | 1 | 1 | 1 | 1 | 0 |
| NM_022064 | 1 | 0 | 1 | 0 | 0 | 1 |
| NM_022065 | 1 | 0 | 1 | 1 | 0 | 0 |
| NM_022066 | 1 | 1 | 1 | 1 | 0 | 0 |
| NM_022067 | 1 | 1 | 1 | 1 | 1 | 0 |
| NM_022068 | 0 | 0 | 0 | 0 | 0 | 1 |
| NM_022070 | 1 | 1 | 1 | 1 | 0 | 0 |
| NM_022071 | 1 | 0 | 1 | 1 | 1 | 1 |
| NM_022072 | 1 | 1 | 1 | 1 | 0 | 0 |
| NM_022073 | 1 | 0 | 1 | 0 | 0 | 0 |
| NM_022074 | 1 | 0 | 1 | 1 | 0 | 1 |
| NM_022075 | 1 | 1 | 1 | 1 | 0 | 0 |
| NM_022076 | 0 | 0 | 0 | 0 | 0 | 1 |
| NM_022077 | 1 | 0 | 1 | 0 | 0 | 0 |
| NM_022078 | 1 | 0 | 1 | 0 | 0 | 0 |
| NM_022081 | 1 | 0 | 1 | 1 | 1 | 1 |
| NM_022082 | 1 | 1 | 1 | 1 | 1 | 1 |
| NM_022083 | 1 | 1 | 1 | 1 | 1 | 1 |
| NM_022086 | 1 | 1 | 1 | 1 | 0 | 0 |
| NM_022087 | 1 | 0 | 1 | 0 | 1 | 1 |
| NM_022088 | 1 | 1 | 1 | 1 | 0 | 0 |
| NM_022089 | 1 | 0 | 1 | 0 | 0 | 0 |
| NM_022091 | 1 | 1 | 1 | 1 | 0 | 1 |
| NM_022092 | 1 | 0 | 1 | 0 | 1 | 0 |
| NM_022094 | 1 | 0 | 1 | 0 | 1 | 1 |
| NM_022095 | 1 | 0 | 1 | 0 | 0 | 0 |

|           |   |   |   |   |   |   |
|-----------|---|---|---|---|---|---|
| NM_022096 | 1 | 1 | 1 | 0 | 0 | 0 |
| NM_022097 | 1 | 0 | 1 | 0 | 0 | 0 |
| NM_022098 | 1 | 0 | 1 | 0 | 0 | 0 |
| NM_022100 | 1 | 0 | 1 | 0 | 0 | 0 |
| NM_022101 | 1 | 0 | 1 | 0 | 0 | 0 |
| NM_022102 | 1 | 0 | 1 | 0 | 0 | 1 |
| NM_022103 | 1 | 0 | 1 | 0 | 0 | 0 |
| NM_022104 | 1 | 0 | 1 | 0 | 0 | 0 |
| NM_022105 | 1 | 0 | 1 | 1 | 1 | 1 |
| NM_022106 | 1 | 1 | 1 | 1 | 0 | 0 |
| NM_022107 | 1 | 0 | 1 | 0 | 0 | 0 |
| NM_022109 | 1 | 1 | 1 | 0 | 0 | 0 |
| NM_022110 | 1 | 0 | 1 | 1 | 1 | 1 |
| NM_022113 | 1 | 0 | 1 | 0 | 0 | 0 |
| NM_022114 | 1 | 0 | 0 | 0 | 0 | 0 |
| NM_022116 | 1 | 0 | 1 | 1 | 0 | 0 |
| NM_022117 | 1 | 0 | 1 | 1 | 0 | 0 |
| NM_022118 | 1 | 0 | 1 | 1 | 1 | 1 |
| NM_022119 | 1 | 1 | 1 | 0 | 0 | 0 |
| NM_022120 | 1 | 0 | 1 | 0 | 0 | 1 |
| NM_022121 | 1 | 0 | 1 | 0 | 0 | 1 |
| NM_022122 | 1 | 0 | 1 | 0 | 0 | 0 |
| NM_022123 | 1 | 0 | 0 | 0 | 0 | 1 |
| NM_022124 | 1 | 1 | 1 | 1 | 0 | 0 |
| NM_022126 | 1 | 1 | 1 | 1 | 0 | 1 |
| NM_022127 | 1 | 0 | 1 | 0 | 0 | 1 |
| NM_022128 | 1 | 1 | 1 | 1 | 0 | 1 |
| NM_022129 | 1 | 0 | 1 | 0 | 0 | 1 |
| NM_022130 | 1 | 0 | 1 | 0 | 0 | 0 |
| NM_022131 | 1 | 1 | 0 | 0 | 0 | 0 |
| NM_022132 | 1 | 0 | 1 | 0 | 0 | 0 |
| NM_022134 | 1 | 0 | 1 | 0 | 0 | 0 |
| NM_022135 | 1 | 0 | 1 | 1 | 0 | 0 |
| NM_022136 | 1 | 1 | 1 | 1 | 0 | 1 |
| NM_022137 | 1 | 1 | 1 | 1 | 0 | 0 |
| NM_022138 | 1 | 0 | 1 | 0 | 0 | 1 |
| NM_022140 | 1 | 0 | 1 | 0 | 0 | 0 |
| NM_022141 | 1 | 0 | 1 | 1 | 1 | 1 |
| NM_022142 | 0 | 1 | 0 | 0 | 0 | 0 |
| NM_022143 | 1 | 1 | 1 | 1 | 1 | 1 |
| NM_022145 | 1 | 0 | 1 | 0 | 0 | 0 |
| NM_022146 | 1 | 0 | 1 | 0 | 0 | 0 |
| NM_022147 | 1 | 1 | 1 | 1 | 0 | 0 |
| NM_022148 | 0 | 0 | 0 | 0 | 0 | 1 |
| NM_022149 | 1 | 1 | 1 | 1 | 0 | 0 |
| NM_022151 | 1 | 0 | 1 | 0 | 1 | 1 |
| NM_022152 | 1 | 0 | 1 | 1 | 1 | 1 |
| NM_022154 | 1 | 0 | 1 | 0 | 0 | 1 |
| NM_022156 | 1 | 1 | 1 | 1 | 1 | 1 |
| NM_022157 | 1 | 0 | 1 | 1 | 0 | 1 |
| NM_022158 | 1 | 1 | 1 | 1 | 0 | 0 |
| NM_022161 | 1 | 0 | 1 | 1 | 0 | 1 |

|           |   |   |   |   |   |   |
|-----------|---|---|---|---|---|---|
| NM_022162 | 1 | 0 | 1 | 0 | 1 | 1 |
| NM_022163 | 1 | 1 | 1 | 1 | 0 | 1 |
| NM_022165 | 1 | 1 | 1 | 1 | 0 | 1 |
| NM_022166 | 1 | 0 | 0 | 1 | 0 | 0 |
| NM_022167 | 1 | 1 | 1 | 1 | 0 | 0 |
| NM_022168 | 1 | 0 | 1 | 0 | 1 | 1 |
| NM_022169 | 1 | 1 | 1 | 0 | 0 | 1 |
| NM_022171 | 1 | 0 | 1 | 0 | 0 | 1 |
| NM_022173 | 1 | 1 | 1 | 1 | 0 | 0 |
| NM_022304 | 1 | 0 | 1 | 0 | 0 | 0 |
| NM_022307 | 1 | 0 | 1 | 0 | 0 | 0 |
| NM_022333 | 1 | 1 | 1 | 1 | 0 | 1 |
| NM_022336 | 1 | 1 | 1 | 1 | 1 | 1 |
| NM_022337 | 1 | 1 | 1 | 1 | 0 | 1 |
| NM_022338 | 1 | 1 | 1 | 1 | 0 | 0 |
| NM_022341 | 1 | 1 | 1 | 1 | 0 | 1 |
| NM_022343 | 1 | 0 | 0 | 0 | 0 | 1 |
| NM_022344 | 1 | 1 | 1 | 1 | 1 | 0 |
| NM_022345 | 1 | 0 | 1 | 1 | 1 | 0 |
| NM_022346 | 1 | 0 | 1 | 0 | 1 | 1 |
| NM_022347 | 1 | 0 | 1 | 0 | 0 | 0 |
| NM_022349 | 1 | 1 | 1 | 1 | 0 | 0 |
| NM_022350 | 1 | 0 | 1 | 0 | 0 | 1 |
| NM_022353 | 1 | 0 | 1 | 1 | 1 | 1 |
| NM_022354 | 1 | 0 | 1 | 1 | 0 | 0 |
| NM_022355 | 1 | 1 | 1 | 1 | 0 | 1 |
| NM_022356 | 1 | 1 | 1 | 1 | 0 | 1 |
| NM_022357 | 1 | 1 | 1 | 1 | 0 | 0 |
| NM_022358 | 1 | 0 | 0 | 0 | 0 | 0 |
| NM_022360 | 1 | 0 | 1 | 1 | 0 | 1 |
| NM_022362 | 1 | 0 | 1 | 1 | 1 | 1 |
| NM_022365 | 1 | 1 | 1 | 1 | 0 | 0 |
| NM_022366 | 1 | 0 | 1 | 1 | 0 | 1 |
| NM_022367 | 1 | 1 | 1 | 1 | 1 | 1 |
| NM_022368 | 1 | 1 | 1 | 1 | 0 | 0 |
| NM_022369 | 0 | 0 | 0 | 0 | 0 | 1 |
| NM_022370 | 1 | 0 | 1 | 1 | 1 | 1 |
| NM_022371 | 1 | 0 | 1 | 1 | 0 | 0 |
| NM_022372 | 1 | 0 | 1 | 0 | 0 | 0 |
| NM_022373 | 1 | 1 | 1 | 1 | 0 | 0 |
| NM_022374 | 1 | 1 | 1 | 1 | 0 | 0 |
| NM_022377 | 1 | 1 | 1 | 1 | 0 | 1 |
| NM_022436 | 1 | 0 | 0 | 0 | 0 | 0 |
| NM_022437 | 1 | 0 | 1 | 0 | 0 | 1 |
| NM_022438 | 1 | 1 | 1 | 1 | 0 | 0 |
| NM_022442 | 1 | 1 | 1 | 1 | 0 | 0 |
| NM_022443 | 1 | 1 | 1 | 0 | 0 | 1 |
| NM_022444 | 0 | 0 | 1 | 0 | 0 | 0 |
| NM_022445 | 1 | 1 | 1 | 1 | 0 | 0 |
| NM_022447 | 1 | 0 | 1 | 0 | 0 | 0 |
| NM_022448 | 1 | 0 | 1 | 1 | 1 | 1 |
| NM_022449 | 1 | 0 | 1 | 0 | 0 | 0 |



|           |   |   |   |   |   |   |
|-----------|---|---|---|---|---|---|
| NM_022450 | 0 | 0 | 1 | 0 | 0 | 0 |
| NM_022451 | 1 | 0 | 1 | 1 | 0 | 0 |
| NM_022452 | 1 | 0 | 1 | 0 | 1 | 1 |
| NM_022453 | 1 | 0 | 1 | 1 | 0 | 0 |
| NM_022454 | 1 | 0 | 1 | 0 | 0 | 0 |
| NM_022456 | 1 | 0 | 1 | 0 | 0 | 0 |
| NM_022457 | 1 | 1 | 1 | 1 | 0 | 1 |
| NM_022458 | 1 | 0 | 1 | 0 | 1 | 1 |
| NM_022459 | 1 | 1 | 1 | 1 | 0 | 1 |
| NM_022460 | 1 | 0 | 1 | 0 | 1 | 1 |
| NM_022461 | 1 | 1 | 1 | 1 | 0 | 0 |
| NM_022462 | 1 | 1 | 1 | 1 | 0 | 0 |
| NM_022463 | 1 | 1 | 1 | 1 | 0 | 1 |
| NM_022464 | 1 | 1 | 1 | 1 | 0 | 0 |
| NM_022465 | 1 | 1 | 1 | 1 | 0 | 1 |
| NM_022466 | 1 | 0 | 1 | 0 | 0 | 0 |
| NM_022467 | 1 | 0 | 1 | 1 | 0 | 1 |
| NM_022468 | 1 | 0 | 1 | 1 | 0 | 1 |
| NM_022469 | 1 | 1 | 1 | 0 | 0 | 1 |
| NM_022470 | 1 | 0 | 1 | 0 | 0 | 0 |
| NM_022471 | 1 | 0 | 1 | 1 | 0 | 1 |
| NM_022473 | 1 | 1 | 1 | 1 | 0 | 1 |
| NM_022474 | 1 | 0 | 1 | 0 | 0 | 0 |
| NM_022475 | 0 | 0 | 0 | 0 | 0 | 1 |
| NM_022476 | 1 | 1 | 1 | 1 | 0 | 1 |
| NM_022479 | 1 | 0 | 1 | 0 | 0 | 0 |
| NM_022480 | 1 | 0 | 1 | 1 | 0 | 0 |
| NM_022481 | 1 | 0 | 1 | 1 | 1 | 1 |
| NM_022482 | 1 | 0 | 1 | 0 | 0 | 0 |
| NM_022483 | 1 | 0 | 1 | 0 | 0 | 0 |
| NM_022484 | 1 | 0 | 1 | 1 | 0 | 0 |
| NM_022485 | 1 | 0 | 1 | 0 | 0 | 0 |
| NM_022486 | 1 | 1 | 1 | 1 | 0 | 0 |
| NM_022487 | 1 | 0 | 1 | 0 | 0 | 0 |
| NM_022488 | 1 | 0 | 1 | 1 | 0 | 0 |
| NM_022489 | 1 | 0 | 1 | 1 | 0 | 0 |
| NM_022490 | 1 | 1 | 1 | 1 | 1 | 1 |
| NM_022492 | 1 | 0 | 1 | 1 | 1 | 0 |
| NM_022493 | 1 | 0 | 1 | 0 | 0 | 0 |
| NM_022494 | 1 | 0 | 1 | 0 | 0 | 0 |
| NM_022495 | 1 | 0 | 1 | 0 | 0 | 0 |
| NM_022496 | 1 | 0 | 1 | 1 | 1 | 1 |
| NM_022497 | 1 | 1 | 1 | 1 | 0 | 0 |
| NM_022549 | 1 | 0 | 1 | 0 | 0 | 0 |
| NM_022551 | 1 | 1 | 0 | 0 | 0 | 0 |
| NM_022553 | 1 | 0 | 1 | 1 | 0 | 0 |
| NM_022555 | 1 | 0 | 1 | 0 | 0 | 0 |
| NM_022556 | 1 | 1 | 0 | 0 | 0 | 0 |
| NM_022557 | 1 | 0 | 1 | 0 | 0 | 1 |
| NM_022558 | 1 | 0 | 0 | 0 | 0 | 0 |
| NM_022559 | 1 | 1 | 1 | 1 | 0 | 0 |
| NM_022564 | 0 | 0 | 0 | 0 | 0 | 1 |

|           |   |   |   |   |   |   |
|-----------|---|---|---|---|---|---|
| NM_022566 | 1 | 0 | 1 | 0 | 1 | 1 |
| NM_022568 | 1 | 1 | 1 | 1 | 0 | 1 |
| NM_022569 | 0 | 1 | 0 | 1 | 0 | 0 |
| NM_022570 | 1 | 1 | 1 | 1 | 0 | 0 |
| NM_022571 | 1 | 0 | 1 | 1 | 0 | 0 |
| NM_022572 | 1 | 0 | 1 | 1 | 0 | 0 |
| NM_022573 | 1 | 0 | 1 | 0 | 0 | 0 |
| NM_022574 | 1 | 0 | 1 | 0 | 0 | 0 |
| NM_022648 | 1 | 0 | 1 | 0 | 0 | 1 |
| NM_022658 | 0 | 0 | 0 | 0 | 0 | 1 |
| NM_022659 | 0 | 1 | 0 | 0 | 0 | 0 |
| NM_022662 | 1 | 1 | 1 | 1 | 0 | 0 |
| NM_022664 | 1 | 0 | 1 | 0 | 0 | 0 |
| NM_022717 | 1 | 0 | 1 | 1 | 0 | 0 |
| NM_022718 | 1 | 1 | 1 | 1 | 0 | 0 |
| NM_022719 | 1 | 0 | 1 | 1 | 0 | 0 |
| NM_022720 | 1 | 0 | 1 | 0 | 1 | 1 |
| NM_022725 | 1 | 0 | 1 | 1 | 0 | 0 |
| NM_022726 | 1 | 1 | 1 | 1 | 0 | 1 |
| NM_022727 | 1 | 1 | 1 | 1 | 0 | 0 |
| NM_022728 | 0 | 0 | 0 | 0 | 0 | 1 |
| NM_022730 | 1 | 1 | 1 | 1 | 0 | 0 |
| NM_022731 | 1 | 1 | 1 | 1 | 1 | 1 |
| NM_022733 | 1 | 1 | 1 | 1 | 0 | 0 |
| NM_022734 | 1 | 1 | 1 | 1 | 0 | 0 |
| NM_022735 | 1 | 0 | 1 | 0 | 1 | 0 |
| NM_022736 | 1 | 1 | 1 | 1 | 0 | 1 |
| NM_022737 | 1 | 0 | 1 | 1 | 0 | 0 |
| NM_022739 | 1 | 1 | 1 | 0 | 0 | 0 |
| NM_022740 | 1 | 0 | 1 | 0 | 0 | 0 |
| NM_022741 | 1 | 0 | 1 | 0 | 1 | 0 |
| NM_022742 | 1 | 1 | 1 | 1 | 0 | 0 |
| NM_022743 | 1 | 0 | 1 | 1 | 1 | 0 |
| NM_022744 | 1 | 0 | 1 | 1 | 0 | 0 |
| NM_022746 | 1 | 1 | 1 | 1 | 0 | 0 |
| NM_022747 | 1 | 0 | 1 | 0 | 0 | 0 |
| NM_022748 | 1 | 1 | 1 | 1 | 0 | 0 |
| NM_022749 | 1 | 0 | 1 | 1 | 0 | 0 |
| NM_022750 | 1 | 0 | 1 | 0 | 1 | 1 |
| NM_022751 | 0 | 0 | 1 | 0 | 0 | 0 |
| NM_022752 | 1 | 0 | 1 | 1 | 0 | 1 |
| NM_022753 | 1 | 1 | 1 | 1 | 0 | 1 |
| NM_022754 | 1 | 1 | 1 | 1 | 1 | 1 |
| NM_022755 | 1 | 0 | 1 | 0 | 0 | 1 |
| NM_022756 | 1 | 0 | 1 | 0 | 1 | 1 |
| NM_022757 | 1 | 0 | 1 | 1 | 0 | 0 |
| NM_022758 | 1 | 0 | 1 | 0 | 0 | 0 |
| NM_022759 | 1 | 1 | 1 | 1 | 1 | 1 |
| NM_022760 | 1 | 1 | 1 | 1 | 0 | 0 |
| NM_022761 | 1 | 0 | 0 | 0 | 0 | 0 |
| NM_022762 | 1 | 1 | 1 | 1 | 0 | 0 |
| NM_022763 | 1 | 0 | 1 | 1 | 1 | 1 |

|           |   |   |   |   |   |   |
|-----------|---|---|---|---|---|---|
| NM_022764 | 1 | 0 | 1 | 1 | 1 | 1 |
| NM_022765 | 1 | 0 | 1 | 0 | 0 | 1 |
| NM_022766 | 1 | 0 | 1 | 0 | 1 | 1 |
| NM_022767 | 1 | 1 | 1 | 1 | 0 | 1 |
| NM_022768 | 1 | 0 | 1 | 0 | 0 | 0 |
| NM_022769 | 1 | 1 | 1 | 1 | 1 | 1 |
| NM_022770 | 1 | 0 | 1 | 0 | 0 | 0 |
| NM_022771 | 1 | 1 | 1 | 1 | 0 | 0 |
| NM_022772 | 1 | 1 | 1 | 1 | 0 | 1 |
| NM_022773 | 1 | 1 | 1 | 1 | 1 | 1 |
| NM_022774 | 1 | 1 | 1 | 1 | 0 | 0 |
| NM_022775 | 1 | 0 | 1 | 0 | 0 | 0 |
| NM_022776 | 1 | 1 | 1 | 1 | 1 | 1 |
| NM_022777 | 1 | 0 | 1 | 0 | 0 | 0 |
| NM_022778 | 1 | 1 | 1 | 1 | 0 | 1 |
| NM_022779 | 1 | 1 | 1 | 1 | 0 | 1 |
| NM_022780 | 1 | 1 | 1 | 1 | 0 | 0 |
| NM_022781 | 1 | 0 | 1 | 0 | 0 | 0 |
| NM_022782 | 1 | 0 | 1 | 1 | 0 | 0 |
| NM_022783 | 1 | 1 | 1 | 1 | 0 | 1 |
| NM_022784 | 1 | 0 | 0 | 1 | 0 | 0 |
| NM_022785 | 1 | 0 | 1 | 0 | 0 | 1 |
| NM_022786 | 1 | 0 | 1 | 1 | 1 | 1 |
| NM_022787 | 1 | 0 | 1 | 0 | 0 | 1 |
| NM_022788 | 1 | 0 | 1 | 0 | 0 | 1 |
| NM_022789 | 1 | 1 | 1 | 1 | 0 | 0 |
| NM_022790 | 1 | 0 | 1 | 0 | 0 | 0 |
| NM_022792 | 1 | 0 | 1 | 0 | 0 | 0 |
| NM_022802 | 1 | 1 | 1 | 1 | 1 | 1 |
| NM_022803 | 1 | 0 | 1 | 0 | 0 | 0 |
| NM_022804 | 1 | 0 | 1 | 1 | 0 | 0 |
| NM_022817 | 1 | 1 | 1 | 1 | 0 | 0 |
| NM_022818 | 1 | 1 | 1 | 1 | 0 | 1 |
| NM_022819 | 1 | 0 | 1 | 0 | 0 | 0 |
| NM_022821 | 1 | 0 | 1 | 0 | 0 | 0 |
| NM_022822 | 1 | 1 | 1 | 1 | 0 | 1 |
| NM_022823 | 1 | 0 | 1 | 0 | 0 | 0 |
| NM_022825 | 1 | 1 | 1 | 1 | 0 | 1 |
| NM_022826 | 1 | 1 | 1 | 1 | 0 | 0 |
| NM_022827 | 1 | 0 | 1 | 1 | 0 | 0 |
| NM_022828 | 1 | 0 | 1 | 0 | 0 | 1 |
| NM_022829 | 1 | 0 | 1 | 0 | 0 | 0 |
| NM_022830 | 1 | 0 | 1 | 1 | 1 | 1 |
| NM_022831 | 1 | 0 | 1 | 0 | 0 | 0 |
| NM_022832 | 1 | 0 | 1 | 0 | 0 | 0 |
| NM_022833 | 1 | 1 | 1 | 1 | 1 | 1 |
| NM_022834 | 1 | 0 | 1 | 0 | 0 | 0 |
| NM_022836 | 1 | 1 | 1 | 1 | 0 | 0 |
| NM_022837 | 1 | 1 | 1 | 1 | 1 | 1 |
| NM_022838 | 1 | 0 | 1 | 1 | 1 | 1 |
| NM_022839 | 1 | 0 | 1 | 1 | 0 | 0 |
| NM_022840 | 1 | 0 | 1 | 1 | 0 | 0 |

|           |   |   |   |   |   |   |
|-----------|---|---|---|---|---|---|
| NM_022841 | 1 | 1 | 1 | 1 | 1 | 1 |
| NM_022842 | 1 | 0 | 1 | 0 | 0 | 0 |
| NM_022872 | 1 | 0 | 1 | 0 | 1 | 1 |
| NM_022874 | 1 | 0 | 1 | 1 | 0 | 1 |
| NM_022875 | 1 | 0 | 1 | 1 | 0 | 0 |
| NM_022876 | 1 | 0 | 1 | 1 | 0 | 0 |
| NM_022877 | 1 | 0 | 1 | 1 | 0 | 0 |
| NM_022893 | 1 | 0 | 1 | 1 | 0 | 0 |
| NM_022894 | 1 | 0 | 1 | 1 | 0 | 0 |
| NM_022895 | 1 | 0 | 1 | 0 | 0 | 1 |
| NM_022898 | 1 | 1 | 1 | 1 | 1 | 1 |
| NM_022899 | 1 | 0 | 1 | 1 | 0 | 0 |
| NM_022900 | 1 | 0 | 1 | 0 | 1 | 1 |
| NM_022901 | 1 | 1 | 0 | 0 | 0 | 1 |
| NM_022902 | 1 | 0 | 1 | 1 | 1 | 0 |
| NM_022903 | 1 | 0 | 1 | 1 | 0 | 0 |
| NM_022905 | 1 | 0 | 0 | 0 | 0 | 1 |
| NM_022906 | 0 | 0 | 1 | 0 | 0 | 0 |
| NM_022907 | 1 | 0 | 1 | 1 | 0 | 0 |
| NM_022908 | 1 | 0 | 1 | 1 | 0 | 0 |
| NM_022909 | 1 | 0 | 1 | 1 | 0 | 1 |
| NM_022911 | 1 | 0 | 1 | 0 | 0 | 0 |
| NM_022912 | 1 | 0 | 1 | 0 | 0 | 0 |
| NM_022913 | 1 | 0 | 1 | 0 | 0 | 0 |
| NM_022914 | 1 | 0 | 1 | 0 | 0 | 0 |
| NM_022915 | 1 | 0 | 1 | 1 | 1 | 1 |
| NM_022916 | 1 | 0 | 1 | 0 | 0 | 0 |
| NM_022918 | 1 | 1 | 1 | 1 | 0 | 0 |
| NM_022971 | 0 | 0 | 1 | 0 | 0 | 0 |
| NM_022977 | 1 | 1 | 1 | 1 | 1 | 1 |
| NM_022978 | 1 | 0 | 1 | 1 | 0 | 0 |
| NM_023002 | 1 | 0 | 1 | 0 | 0 | 0 |
| NM_023003 | 1 | 1 | 1 | 1 | 1 | 1 |
| NM_023004 | 1 | 0 | 1 | 0 | 0 | 0 |
| NM_023005 | 1 | 0 | 1 | 1 | 0 | 0 |
| NM_023007 | 1 | 0 | 1 | 1 | 1 | 0 |
| NM_023008 | 1 | 0 | 1 | 0 | 0 | 1 |
| NM_023009 | 1 | 0 | 1 | 0 | 0 | 0 |
| NM_023011 | 1 | 0 | 1 | 1 | 0 | 0 |
| NM_023012 | 1 | 0 | 1 | 0 | 0 | 1 |
| NM_023013 | 1 | 0 | 1 | 0 | 0 | 0 |
| NM_023014 | 1 | 0 | 0 | 0 | 0 | 1 |
| NM_023015 | 1 | 0 | 1 | 0 | 0 | 0 |
| NM_023016 | 1 | 1 | 1 | 1 | 1 | 0 |
| NM_023018 | 1 | 0 | 1 | 0 | 0 | 0 |
| NM_023028 | 1 | 1 | 1 | 1 | 0 | 1 |
| NM_023034 | 1 | 1 | 1 | 1 | 0 | 0 |
| NM_023035 | 1 | 0 | 1 | 0 | 0 | 1 |
| NM_023036 | 1 | 1 | 1 | 1 | 0 | 0 |
| NM_023037 | 1 | 1 | 1 | 1 | 1 | 1 |
| NM_023038 | 1 | 0 | 1 | 1 | 0 | 1 |
| NM_023039 | 1 | 0 | 1 | 0 | 1 | 1 |

|           |   |   |   |   |   |   |
|-----------|---|---|---|---|---|---|
| NM_023068 | 1 | 0 | 1 | 0 | 0 | 0 |
| NM_023070 | 1 | 1 | 1 | 1 | 0 | 0 |
| NM_023071 | 1 | 1 | 1 | 1 | 0 | 0 |
| NM_023073 | 0 | 0 | 1 | 0 | 0 | 0 |
| NM_023074 | 1 | 0 | 1 | 0 | 1 | 1 |
| NM_023075 | 1 | 1 | 1 | 1 | 0 | 0 |
| NM_023076 | 1 | 0 | 1 | 0 | 1 | 1 |
| NM_023077 | 1 | 0 | 1 | 0 | 0 | 0 |
| NM_023078 | 1 | 1 | 1 | 1 | 1 | 1 |
| NM_023079 | 1 | 1 | 1 | 0 | 0 | 1 |
| NM_023083 | 1 | 0 | 1 | 1 | 1 | 0 |
| NM_023089 | 1 | 0 | 1 | 1 | 0 | 0 |
| NM_023107 | 0 | 0 | 1 | 0 | 0 | 0 |
| NM_023108 | 1 | 0 | 1 | 0 | 0 | 1 |
| NM_023111 | 1 | 1 | 1 | 0 | 0 | 0 |
| NM_023112 | 1 | 1 | 1 | 0 | 0 | 0 |
| NM_023914 | 1 | 1 | 1 | 1 | 1 | 1 |
| NM_023917 | 0 | 0 | 0 | 0 | 0 | 1 |
| NM_023919 | 0 | 0 | 1 | 0 | 0 | 0 |
| NM_023920 | 0 | 0 | 0 | 0 | 0 | 1 |
| NM_023921 | 1 | 1 | 1 | 1 | 0 | 0 |
| NM_023922 | 1 | 1 | 1 | 1 | 1 | 1 |
| NM_023923 | 1 | 0 | 1 | 0 | 0 | 0 |
| NM_023924 | 1 | 0 | 1 | 1 | 0 | 0 |
| NM_023925 | 1 | 0 | 1 | 1 | 1 | 1 |
| NM_023926 | 1 | 1 | 1 | 1 | 1 | 1 |
| NM_023927 | 1 | 1 | 1 | 1 | 0 | 0 |
| NM_023928 | 1 | 1 | 1 | 1 | 0 | 1 |
| NM_023929 | 1 | 0 | 1 | 0 | 0 | 0 |
| NM_023931 | 1 | 0 | 1 | 0 | 0 | 1 |
| NM_023932 | 1 | 0 | 1 | 0 | 0 | 0 |
| NM_023933 | 1 | 1 | 1 | 1 | 0 | 0 |
| NM_023934 | 1 | 1 | 1 | 1 | 0 | 1 |
| NM_023935 | 1 | 1 | 1 | 1 | 0 | 0 |
| NM_023936 | 1 | 1 | 1 | 0 | 1 | 1 |
| NM_023937 | 1 | 1 | 1 | 1 | 0 | 0 |
| NM_023938 | 1 | 0 | 1 | 0 | 0 | 0 |
| NM_023940 | 1 | 0 | 1 | 0 | 0 | 0 |
| NM_023942 | 1 | 0 | 1 | 0 | 0 | 0 |
| NM_023944 | 1 | 1 | 1 | 1 | 1 | 1 |
| NM_023947 | 1 | 0 | 1 | 1 | 0 | 0 |
| NM_023948 | 1 | 0 | 1 | 0 | 0 | 1 |
| NM_024005 | 1 | 0 | 1 | 1 | 0 | 0 |
| NM_024006 | 1 | 1 | 1 | 1 | 0 | 1 |
| NM_024007 | 1 | 0 | 1 | 0 | 0 | 1 |
| NM_024009 | 0 | 0 | 0 | 1 | 0 | 0 |
| NM_024012 | 1 | 0 | 0 | 0 | 0 | 0 |
| NM_024013 | 1 | 0 | 0 | 0 | 0 | 1 |
| NM_024014 | 1 | 0 | 1 | 0 | 0 | 0 |
| NM_024015 | 1 | 1 | 1 | 0 | 0 | 0 |
| NM_024017 | 1 | 0 | 1 | 0 | 0 | 1 |
| NM_024018 | 1 | 1 | 1 | 1 | 0 | 0 |

|           |   |   |   |   |   |   |
|-----------|---|---|---|---|---|---|
| NM_024019 | 1 | 1 | 1 | 0 | 0 | 1 |
| NM_024023 | 1 | 0 | 1 | 1 | 0 | 0 |
| NM_024025 | 1 | 0 | 1 | 0 | 0 | 0 |
| NM_024026 | 1 | 0 | 1 | 0 | 1 | 1 |
| NM_024027 | 1 | 0 | 1 | 0 | 0 | 0 |
| NM_024028 | 1 | 1 | 1 | 1 | 0 | 0 |
| NM_024029 | 1 | 0 | 1 | 1 | 0 | 0 |
| NM_024031 | 1 | 0 | 1 | 0 | 1 | 1 |
| NM_024032 | 1 | 1 | 1 | 1 | 0 | 0 |
| NM_024033 | 1 | 0 | 1 | 0 | 0 | 0 |
| NM_024034 | 1 | 0 | 1 | 1 | 1 | 1 |
| NM_024035 | 0 | 0 | 1 | 0 | 0 | 0 |
| NM_024036 | 1 | 1 | 1 | 1 | 0 | 1 |
| NM_024037 | 1 | 1 | 1 | 1 | 0 | 0 |
| NM_024038 | 1 | 1 | 1 | 0 | 0 | 0 |
| NM_024039 | 1 | 0 | 1 | 1 | 1 | 1 |
| NM_024040 | 1 | 1 | 1 | 1 | 1 | 1 |
| NM_024041 | 1 | 0 | 1 | 0 | 0 | 0 |
| NM_024042 | 1 | 0 | 1 | 1 | 0 | 0 |
| NM_024045 | 1 | 0 | 1 | 1 | 1 | 1 |
| NM_024046 | 1 | 0 | 1 | 0 | 0 | 0 |
| NM_024047 | 1 | 1 | 1 | 1 | 0 | 0 |
| NM_024048 | 1 | 0 | 1 | 0 | 0 | 0 |
| NM_024049 | 1 | 0 | 1 | 0 | 0 | 0 |
| NM_024050 | 1 | 0 | 1 | 0 | 0 | 0 |
| NM_024051 | 1 | 1 | 1 | 1 | 0 | 1 |
| NM_024052 | 1 | 1 | 1 | 1 | 0 | 0 |
| NM_024053 | 1 | 0 | 1 | 0 | 0 | 1 |
| NM_024054 | 1 | 0 | 1 | 0 | 1 | 1 |
| NM_024055 | 1 | 1 | 1 | 1 | 0 | 1 |
| NM_024056 | 1 | 0 | 1 | 1 | 0 | 1 |
| NM_024057 | 1 | 0 | 1 | 1 | 0 | 1 |
| NM_024058 | 1 | 0 | 0 | 0 | 0 | 0 |
| NM_024059 | 1 | 1 | 1 | 1 | 1 | 1 |
| NM_024060 | 1 | 0 | 1 | 1 | 1 | 1 |
| NM_024061 | 1 | 1 | 1 | 1 | 0 | 0 |
| NM_024062 | 1 | 1 | 1 | 1 | 0 | 0 |
| NM_024063 | 1 | 1 | 1 | 1 | 0 | 0 |
| NM_024064 | 1 | 0 | 1 | 0 | 1 | 1 |
| NM_024065 | 1 | 1 | 1 | 1 | 0 | 1 |
| NM_024067 | 1 | 1 | 1 | 1 | 0 | 0 |
| NM_024068 | 1 | 0 | 1 | 1 | 0 | 0 |
| NM_024069 | 1 | 0 | 1 | 0 | 0 | 1 |
| NM_024070 | 1 | 0 | 1 | 1 | 1 | 1 |
| NM_024071 | 1 | 0 | 1 | 0 | 1 | 0 |
| NM_024072 | 1 | 0 | 1 | 0 | 0 | 1 |
| NM_024074 | 1 | 0 | 1 | 0 | 1 | 0 |
| NM_024075 | 1 | 1 | 1 | 1 | 1 | 1 |
| NM_024076 | 1 | 1 | 1 | 1 | 1 | 1 |
| NM_024077 | 1 | 0 | 1 | 0 | 1 | 1 |
| NM_024078 | 1 | 0 | 1 | 0 | 0 | 0 |
| NM_024079 | 1 | 1 | 1 | 1 | 0 | 0 |

|           |   |   |   |   |   |   |
|-----------|---|---|---|---|---|---|
| NM_024080 | 1 | 1 | 1 | 1 | 0 | 0 |
| NM_024081 | 1 | 0 | 1 | 1 | 1 | 1 |
| NM_024082 | 1 | 1 | 0 | 0 | 0 | 1 |
| NM_024083 | 1 | 0 | 1 | 1 | 0 | 0 |
| NM_024084 | 1 | 1 | 1 | 1 | 0 | 1 |
| NM_024085 | 1 | 0 | 1 | 0 | 0 | 0 |
| NM_024086 | 1 | 0 | 1 | 0 | 0 | 0 |
| NM_024087 | 1 | 0 | 1 | 0 | 0 | 1 |
| NM_024089 | 1 | 1 | 1 | 1 | 0 | 1 |
| NM_024090 | 1 | 0 | 1 | 0 | 0 | 0 |
| NM_024091 | 1 | 0 | 1 | 1 | 1 | 1 |
| NM_024092 | 1 | 1 | 1 | 1 | 0 | 0 |
| NM_024093 | 1 | 0 | 1 | 1 | 1 | 1 |
| NM_024094 | 1 | 0 | 1 | 0 | 0 | 1 |
| NM_024095 | 1 | 0 | 1 | 1 | 0 | 0 |
| NM_024096 | 1 | 1 | 1 | 1 | 0 | 0 |
| NM_024097 | 1 | 0 | 1 | 0 | 1 | 1 |
| NM_024098 | 1 | 0 | 1 | 0 | 0 | 0 |
| NM_024099 | 1 | 0 | 1 | 0 | 1 | 1 |
| NM_024102 | 1 | 0 | 1 | 1 | 0 | 0 |
| NM_024103 | 1 | 0 | 0 | 0 | 0 | 1 |
| NM_024104 | 1 | 0 | 1 | 0 | 1 | 1 |
| NM_024105 | 1 | 1 | 1 | 1 | 0 | 0 |
| NM_024106 | 1 | 1 | 1 | 0 | 0 | 0 |
| NM_024108 | 1 | 1 | 1 | 1 | 0 | 0 |
| NM_024109 | 1 | 0 | 1 | 0 | 0 | 1 |
| NM_024110 | 0 | 0 | 0 | 0 | 0 | 1 |
| NM_024111 | 1 | 0 | 0 | 0 | 0 | 1 |
| NM_024112 | 1 | 0 | 1 | 0 | 0 | 0 |
| NM_024113 | 1 | 0 | 1 | 1 | 1 | 1 |
| NM_024114 | 1 | 0 | 1 | 0 | 0 | 1 |
| NM_024115 | 1 | 1 | 1 | 1 | 0 | 1 |
| NM_024116 | 1 | 1 | 1 | 1 | 0 | 0 |
| NM_024117 | 1 | 0 | 1 | 0 | 1 | 0 |
| NM_024119 | 1 | 0 | 1 | 0 | 0 | 1 |
| NM_024120 | 0 | 1 | 1 | 1 | 0 | 0 |
| NM_024122 | 1 | 0 | 1 | 1 | 0 | 1 |
| NM_024123 | 1 | 0 | 0 | 0 | 0 | 0 |
| NM_024164 | 1 | 1 | 1 | 0 | 0 | 0 |
| NM_024292 | 1 | 0 | 1 | 1 | 1 | 1 |
| NM_024293 | 1 | 0 | 1 | 0 | 0 | 0 |
| NM_024294 | 1 | 0 | 1 | 0 | 1 | 1 |
| NM_024295 | 1 | 0 | 1 | 0 | 0 | 0 |
| NM_024296 | 1 | 0 | 1 | 1 | 1 | 0 |
| NM_024297 | 1 | 1 | 1 | 1 | 0 | 0 |
| NM_024298 | 1 | 1 | 1 | 1 | 0 | 0 |
| NM_024299 | 1 | 0 | 1 | 1 | 1 | 1 |
| NM_024300 | 1 | 1 | 1 | 1 | 0 | 0 |
| NM_024301 | 1 | 1 | 1 | 1 | 0 | 0 |
| NM_024302 | 1 | 0 | 1 | 0 | 1 | 0 |
| NM_024303 | 1 | 1 | 1 | 1 | 1 | 0 |
| NM_024306 | 1 | 1 | 1 | 1 | 0 | 0 |

|           |   |   |   |   |   |   |
|-----------|---|---|---|---|---|---|
| NM_024307 | 1 | 0 | 1 | 0 | 0 | 0 |
| NM_024308 | 1 | 0 | 1 | 0 | 0 | 0 |
| NM_024309 | 1 | 1 | 1 | 0 | 0 | 1 |
| NM_024310 | 1 | 0 | 1 | 1 | 0 | 0 |
| NM_024311 | 1 | 0 | 1 | 0 | 0 | 0 |
| NM_024312 | 0 | 0 | 0 | 0 | 0 | 1 |
| NM_024313 | 1 | 0 | 1 | 1 | 1 | 1 |
| NM_024314 | 1 | 0 | 1 | 0 | 0 | 0 |
| NM_024315 | 1 | 1 | 1 | 1 | 1 | 1 |
| NM_024316 | 1 | 0 | 1 | 0 | 0 | 0 |
| NM_024317 | 1 | 1 | 1 | 0 | 0 | 0 |
| NM_024318 | 1 | 0 | 1 | 1 | 1 | 1 |
| NM_024319 | 1 | 0 | 1 | 1 | 1 | 1 |
| NM_024321 | 1 | 0 | 1 | 0 | 0 | 1 |
| NM_024322 | 1 | 1 | 0 | 1 | 0 | 1 |
| NM_024323 | 1 | 0 | 1 | 0 | 0 | 0 |
| NM_024324 | 1 | 1 | 1 | 1 | 0 | 1 |
| NM_024325 | 1 | 1 | 1 | 1 | 0 | 0 |
| NM_024326 | 1 | 1 | 1 | 1 | 0 | 0 |
| NM_024327 | 1 | 0 | 1 | 1 | 1 | 0 |
| NM_024328 | 1 | 0 | 1 | 1 | 0 | 0 |
| NM_024329 | 1 | 0 | 1 | 0 | 0 | 1 |
| NM_024330 | 1 | 1 | 1 | 1 | 1 | 1 |
| NM_024331 | 1 | 1 | 1 | 1 | 0 | 0 |
| NM_024333 | 1 | 1 | 1 | 1 | 0 | 0 |
| NM_024334 | 1 | 1 | 1 | 1 | 0 | 0 |
| NM_024339 | 1 | 0 | 1 | 0 | 0 | 0 |
| NM_024341 | 1 | 0 | 1 | 0 | 0 | 0 |
| NM_024342 | 1 | 1 | 1 | 1 | 0 | 1 |
| NM_024345 | 1 | 0 | 1 | 0 | 0 | 1 |
| NM_024348 | 1 | 0 | 1 | 0 | 0 | 0 |
| NM_024407 | 1 | 1 | 1 | 0 | 0 | 0 |
| NM_024408 | 1 | 0 | 1 | 0 | 1 | 1 |
| NM_024409 | 0 | 0 | 0 | 0 | 0 | 1 |
| NM_024410 | 0 | 0 | 1 | 0 | 0 | 1 |
| NM_024411 | 1 | 0 | 1 | 0 | 0 | 0 |
| NM_024419 | 1 | 0 | 1 | 1 | 1 | 1 |
| NM_024420 | 1 | 1 | 1 | 1 | 0 | 0 |
| NM_024421 | 1 | 1 | 1 | 1 | 0 | 0 |
| NM_024423 | 1 | 0 | 1 | 0 | 0 | 0 |
| NM_024426 | 1 | 0 | 1 | 0 | 0 | 0 |
| NM_024430 | 1 | 1 | 1 | 1 | 1 | 1 |
| NM_024482 | 1 | 0 | 1 | 0 | 0 | 1 |
| NM_024490 | 1 | 0 | 1 | 1 | 0 | 1 |
| NM_024491 | 1 | 0 | 1 | 1 | 1 | 0 |
| NM_024492 | 1 | 0 | 1 | 0 | 0 | 0 |
| NM_024493 | 1 | 0 | 1 | 1 | 0 | 0 |
| NM_024494 | 1 | 1 | 1 | 1 | 0 | 0 |
| NM_024496 | 1 | 0 | 1 | 1 | 0 | 0 |
| NM_024498 | 1 | 0 | 1 | 1 | 0 | 0 |
| NM_024501 | 0 | 0 | 0 | 0 | 0 | 1 |
| NM_024503 | 1 | 1 | 1 | 1 | 0 | 0 |



|           |   |   |   |   |   |   |
|-----------|---|---|---|---|---|---|
| NM_024504 | 0 | 0 | 1 | 0 | 0 | 0 |
| NM_024505 | 1 | 0 | 0 | 0 | 0 | 0 |
| NM_024506 | 1 | 0 | 1 | 0 | 0 | 1 |
| NM_024507 | 1 | 1 | 1 | 1 | 0 | 0 |
| NM_024508 | 1 | 0 | 1 | 0 | 0 | 1 |
| NM_024509 | 1 | 1 | 1 | 1 | 0 | 0 |
| NM_024510 | 1 | 0 | 1 | 0 | 0 | 0 |
| NM_024511 | 1 | 0 | 1 | 1 | 0 | 0 |
| NM_024512 | 1 | 1 | 1 | 1 | 0 | 0 |
| NM_024513 | 1 | 0 | 1 | 0 | 0 | 1 |
| NM_024515 | 1 | 0 | 1 | 1 | 0 | 0 |
| NM_024516 | 1 | 1 | 1 | 1 | 0 | 0 |
| NM_024518 | 0 | 0 | 0 | 0 | 0 | 1 |
| NM_024519 | 1 | 1 | 1 | 1 | 0 | 0 |
| NM_024520 | 1 | 0 | 1 | 0 | 0 | 0 |
| NM_024522 | 0 | 0 | 1 | 0 | 0 | 0 |
| NM_024523 | 1 | 1 | 1 | 1 | 0 | 0 |
| NM_024524 | 1 | 0 | 1 | 1 | 1 | 1 |
| NM_024525 | 1 | 1 | 1 | 1 | 0 | 0 |
| NM_024526 | 1 | 0 | 1 | 0 | 0 | 0 |
| NM_024527 | 1 | 1 | 1 | 1 | 1 | 0 |
| NM_024528 | 1 | 0 | 1 | 0 | 0 | 0 |
| NM_024529 | 1 | 1 | 1 | 1 | 0 | 0 |
| NM_024530 | 1 | 1 | 1 | 1 | 0 | 0 |
| NM_024531 | 1 | 1 | 1 | 1 | 0 | 0 |
| NM_024532 | 1 | 0 | 1 | 1 | 0 | 0 |
| NM_024533 | 0 | 0 | 0 | 0 | 0 | 1 |
| NM_024534 | 0 | 0 | 1 | 0 | 0 | 0 |
| NM_024535 | 1 | 0 | 1 | 0 | 0 | 0 |
| NM_024536 | 1 | 0 | 1 | 0 | 0 | 0 |
| NM_024537 | 1 | 1 | 1 | 1 | 0 | 0 |
| NM_024539 | 0 | 1 | 1 | 1 | 0 | 0 |
| NM_024541 | 1 | 1 | 1 | 1 | 0 | 0 |
| NM_024544 | 1 | 0 | 1 | 0 | 0 | 0 |
| NM_024545 | 1 | 1 | 1 | 1 | 0 | 0 |
| NM_024546 | 1 | 0 | 1 | 0 | 1 | 1 |
| NM_024547 | 1 | 0 | 1 | 1 | 0 | 0 |
| NM_024548 | 1 | 1 | 1 | 1 | 0 | 0 |
| NM_024549 | 1 | 1 | 1 | 1 | 1 | 1 |
| NM_024551 | 1 | 0 | 1 | 0 | 0 | 1 |
| NM_024552 | 1 | 1 | 1 | 1 | 0 | 0 |
| NM_024553 | 1 | 0 | 1 | 1 | 0 | 0 |
| NM_024554 | 1 | 1 | 1 | 1 | 0 | 0 |
| NM_024556 | 1 | 1 | 1 | 1 | 1 | 1 |
| NM_024557 | 1 | 1 | 1 | 1 | 1 | 1 |
| NM_024558 | 1 | 1 | 1 | 1 | 0 | 0 |
| NM_024560 | 1 | 0 | 1 | 0 | 0 | 0 |
| NM_024561 | 1 | 1 | 1 | 1 | 1 | 1 |
| NM_024563 | 1 | 1 | 1 | 1 | 1 | 1 |
| NM_024564 | 1 | 0 | 1 | 0 | 1 | 1 |
| NM_024565 | 1 | 1 | 1 | 1 | 0 | 1 |
| NM_024567 | 1 | 0 | 1 | 0 | 0 | 1 |

|           |   |   |   |   |   |   |
|-----------|---|---|---|---|---|---|
| NM_024568 | 1 | 0 | 1 | 1 | 1 | 0 |
| NM_024569 | 1 | 1 | 1 | 1 | 0 | 0 |
| NM_024570 | 1 | 0 | 1 | 1 | 0 | 0 |
| NM_024571 | 1 | 1 | 1 | 1 | 1 | 1 |
| NM_024572 | 1 | 1 | 1 | 1 | 1 | 1 |
| NM_024573 | 1 | 0 | 1 | 1 | 0 | 0 |
| NM_024575 | 1 | 0 | 1 | 1 | 1 | 1 |
| NM_024576 | 1 | 1 | 1 | 1 | 1 | 1 |
| NM_024578 | 1 | 1 | 1 | 1 | 1 | 0 |
| NM_024579 | 1 | 1 | 1 | 1 | 1 | 0 |
| NM_024580 | 1 | 1 | 1 | 1 | 0 | 0 |
| NM_024581 | 1 | 1 | 1 | 1 | 0 | 1 |
| NM_024582 | 1 | 1 | 1 | 1 | 1 | 0 |
| NM_024583 | 1 | 0 | 1 | 0 | 0 | 0 |
| NM_024584 | 1 | 1 | 1 | 1 | 0 | 0 |
| NM_024585 | 1 | 0 | 1 | 1 | 1 | 1 |
| NM_024586 | 1 | 1 | 1 | 1 | 1 | 1 |
| NM_024587 | 1 | 1 | 1 | 1 | 0 | 0 |
| NM_024588 | 1 | 0 | 1 | 1 | 1 | 1 |
| NM_024589 | 1 | 0 | 1 | 0 | 0 | 1 |
| NM_024590 | 1 | 1 | 1 | 1 | 0 | 0 |
| NM_024591 | 1 | 0 | 1 | 0 | 0 | 1 |
| NM_024592 | 1 | 1 | 1 | 1 | 0 | 0 |
| NM_024593 | 1 | 1 | 1 | 1 | 0 | 1 |
| NM_024594 | 1 | 1 | 1 | 1 | 0 | 0 |
| NM_024595 | 1 | 0 | 1 | 1 | 1 | 1 |
| NM_024596 | 1 | 0 | 1 | 1 | 0 | 0 |
| NM_024598 | 1 | 1 | 1 | 1 | 1 | 1 |
| NM_024599 | 1 | 0 | 1 | 0 | 0 | 0 |
| NM_024600 | 1 | 1 | 1 | 1 | 0 | 0 |
| NM_024602 | 1 | 0 | 1 | 1 | 0 | 0 |
| NM_024603 | 1 | 1 | 1 | 1 | 1 | 0 |
| NM_024604 | 1 | 0 | 1 | 0 | 1 | 0 |
| NM_024605 | 1 | 1 | 1 | 1 | 0 | 0 |
| NM_024606 | 1 | 1 | 1 | 1 | 1 | 1 |
| NM_024607 | 1 | 1 | 1 | 1 | 1 | 1 |
| NM_024608 | 1 | 0 | 1 | 0 | 1 | 1 |
| NM_024609 | 1 | 0 | 1 | 0 | 0 | 0 |
| NM_024610 | 1 | 1 | 1 | 1 | 0 | 0 |
| NM_024611 | 1 | 0 | 1 | 1 | 0 | 0 |
| NM_024612 | 1 | 1 | 1 | 0 | 1 | 1 |
| NM_024613 | 1 | 0 | 1 | 0 | 0 | 1 |
| NM_024614 | 1 | 1 | 1 | 1 | 1 | 1 |
| NM_024615 | 1 | 1 | 1 | 1 | 1 | 1 |
| NM_024616 | 1 | 0 | 1 | 0 | 0 | 0 |
| NM_024617 | 1 | 0 | 1 | 0 | 1 | 1 |
| NM_024618 | 1 | 1 | 1 | 1 | 0 | 0 |
| NM_024619 | 1 | 0 | 1 | 1 | 1 | 1 |
| NM_024620 | 1 | 0 | 1 | 1 | 1 | 0 |
| NM_024621 | 1 | 0 | 1 | 0 | 0 | 1 |
| NM_024622 | 1 | 1 | 1 | 1 | 0 | 0 |
| NM_024623 | 1 | 0 | 1 | 1 | 0 | 0 |

|           |   |   |   |   |   |   |
|-----------|---|---|---|---|---|---|
| NM_024624 | 1 | 1 | 1 | 1 | 0 | 1 |
| NM_024625 | 1 | 0 | 1 | 0 | 1 | 1 |
| NM_024626 | 1 | 0 | 0 | 0 | 0 | 0 |
| NM_024627 | 1 | 1 | 1 | 1 | 1 | 1 |
| NM_024628 | 1 | 0 | 1 | 0 | 0 | 0 |
| NM_024629 | 1 | 0 | 1 | 0 | 0 | 1 |
| NM_024630 | 1 | 0 | 1 | 0 | 1 | 0 |
| NM_024631 | 1 | 0 | 1 | 0 | 0 | 0 |
| NM_024632 | 1 | 1 | 1 | 1 | 1 | 1 |
| NM_024633 | 1 | 1 | 1 | 1 | 0 | 0 |
| NM_024635 | 1 | 0 | 1 | 0 | 0 | 0 |
| NM_024636 | 1 | 1 | 1 | 1 | 0 | 0 |
| NM_024637 | 1 | 1 | 1 | 1 | 0 | 0 |
| NM_024638 | 1 | 0 | 1 | 0 | 0 | 0 |
| NM_024639 | 1 | 0 | 1 | 1 | 1 | 0 |
| NM_024640 | 1 | 0 | 1 | 1 | 0 | 0 |
| NM_024641 | 1 | 0 | 1 | 0 | 0 | 0 |
| NM_024642 | 1 | 1 | 1 | 1 | 0 | 1 |
| NM_024643 | 1 | 0 | 1 | 0 | 0 | 0 |
| NM_024644 | 1 | 1 | 1 | 1 | 0 | 0 |
| NM_024645 | 1 | 0 | 1 | 0 | 1 | 1 |
| NM_024647 | 1 | 0 | 1 | 0 | 0 | 0 |
| NM_024648 | 1 | 1 | 1 | 1 | 1 | 1 |
| NM_024649 | 1 | 0 | 1 | 1 | 1 | 1 |
| NM_024650 | 1 | 0 | 1 | 0 | 0 | 0 |
| NM_024652 | 1 | 1 | 1 | 1 | 1 | 0 |
| NM_024653 | 1 | 0 | 1 | 1 | 0 | 0 |
| NM_024654 | 1 | 0 | 1 | 0 | 0 | 1 |
| NM_024656 | 1 | 1 | 1 | 1 | 0 | 1 |
| NM_024657 | 1 | 1 | 1 | 1 | 0 | 0 |
| NM_024658 | 1 | 0 | 1 | 0 | 0 | 0 |
| NM_024659 | 1 | 1 | 1 | 1 | 0 | 1 |
| NM_024660 | 1 | 1 | 1 | 1 | 0 | 1 |
| NM_024661 | 1 | 0 | 1 | 1 | 0 | 0 |
| NM_024662 | 1 | 0 | 1 | 1 | 1 | 1 |
| NM_024663 | 1 | 0 | 1 | 0 | 0 | 1 |
| NM_024664 | 1 | 0 | 1 | 0 | 1 | 1 |
| NM_024665 | 1 | 0 | 1 | 0 | 0 | 0 |
| NM_024666 | 1 | 0 | 1 | 1 | 0 | 1 |
| NM_024667 | 1 | 0 | 1 | 1 | 0 | 0 |
| NM_024668 | 1 | 0 | 1 | 1 | 0 | 0 |
| NM_024669 | 1 | 1 | 1 | 1 | 0 | 0 |
| NM_024670 | 1 | 0 | 0 | 0 | 0 | 1 |
| NM_024671 | 1 | 0 | 1 | 0 | 0 | 0 |
| NM_024672 | 1 | 0 | 1 | 0 | 0 | 0 |
| NM_024674 | 1 | 0 | 1 | 0 | 0 | 1 |
| NM_024675 | 1 | 0 | 1 | 1 | 1 | 1 |
| NM_024676 | 1 | 0 | 1 | 1 | 0 | 0 |
| NM_024677 | 1 | 0 | 1 | 1 | 1 | 1 |
| NM_024678 | 1 | 0 | 1 | 1 | 1 | 1 |
| NM_024679 | 1 | 1 | 1 | 1 | 0 | 0 |
| NM_024680 | 1 | 0 | 1 | 0 | 1 | 1 |

|           |   |   |   |   |   |   |
|-----------|---|---|---|---|---|---|
| NM_024681 | 1 | 0 | 1 | 0 | 1 | 0 |
| NM_024682 | 1 | 1 | 1 | 1 | 0 | 0 |
| NM_024683 | 1 | 0 | 1 | 1 | 0 | 0 |
| NM_024685 | 1 | 0 | 1 | 1 | 0 | 0 |
| NM_024686 | 1 | 0 | 1 | 0 | 0 | 0 |
| NM_024688 | 1 | 0 | 1 | 0 | 1 | 1 |
| NM_024691 | 1 | 1 | 1 | 1 | 0 | 0 |
| NM_024692 | 1 | 0 | 1 | 0 | 1 | 1 |
| NM_024693 | 1 | 1 | 1 | 1 | 0 | 1 |
| NM_024694 | 1 | 0 | 0 | 0 | 0 | 0 |
| NM_024695 | 1 | 0 | 1 | 0 | 0 | 0 |
| NM_024696 | 1 | 1 | 1 | 1 | 0 | 0 |
| NM_024697 | 1 | 1 | 1 | 1 | 0 | 0 |
| NM_024698 | 1 | 1 | 1 | 1 | 1 | 1 |
| NM_024699 | 1 | 1 | 1 | 1 | 1 | 1 |
| NM_024700 | 1 | 0 | 1 | 0 | 0 | 0 |
| NM_024701 | 1 | 1 | 1 | 1 | 0 | 0 |
| NM_024703 | 1 | 1 | 1 | 1 | 0 | 0 |
| NM_024704 | 1 | 0 | 1 | 1 | 1 | 0 |
| NM_024705 | 1 | 1 | 1 | 1 | 1 | 1 |
| NM_024706 | 1 | 1 | 1 | 1 | 0 | 0 |
| NM_024707 | 0 | 0 | 0 | 0 | 0 | 1 |
| NM_024708 | 1 | 0 | 1 | 0 | 0 | 0 |
| NM_024709 | 1 | 1 | 1 | 1 | 0 | 0 |
| NM_024710 | 1 | 1 | 1 | 1 | 1 | 1 |
| NM_024711 | 1 | 0 | 1 | 1 | 1 | 1 |
| NM_024712 | 1 | 0 | 1 | 0 | 0 | 0 |
| NM_024713 | 1 | 1 | 1 | 1 | 0 | 0 |
| NM_024715 | 1 | 0 | 1 | 0 | 0 | 1 |
| NM_024717 | 1 | 0 | 1 | 1 | 0 | 0 |
| NM_024718 | 1 | 0 | 1 | 1 | 0 | 1 |
| NM_024719 | 1 | 0 | 1 | 1 | 0 | 0 |
| NM_024720 | 1 | 0 | 1 | 0 | 0 | 1 |
| NM_024721 | 0 | 0 | 0 | 0 | 0 | 1 |
| NM_024722 | 1 | 1 | 1 | 1 | 0 | 0 |
| NM_024723 | 1 | 0 | 1 | 0 | 0 | 0 |
| NM_024725 | 1 | 0 | 1 | 0 | 1 | 0 |
| NM_024726 | 1 | 1 | 1 | 1 | 0 | 1 |
| NM_024727 | 1 | 0 | 1 | 0 | 0 | 0 |
| NM_024728 | 1 | 0 | 1 | 0 | 0 | 0 |
| NM_024729 | 1 | 0 | 1 | 0 | 0 | 0 |
| NM_024730 | 1 | 0 | 1 | 0 | 0 | 0 |
| NM_024731 | 1 | 1 | 1 | 1 | 0 | 0 |
| NM_024732 | 0 | 0 | 1 | 0 | 0 | 0 |
| NM_024733 | 1 | 1 | 1 | 1 | 1 | 1 |
| NM_024734 | 1 | 1 | 1 | 1 | 0 | 1 |
| NM_024735 | 1 | 1 | 1 | 1 | 1 | 1 |
| NM_024736 | 1 | 0 | 1 | 0 | 1 | 1 |
| NM_024738 | 1 | 0 | 1 | 0 | 0 | 1 |
| NM_024740 | 1 | 1 | 1 | 1 | 1 | 1 |
| NM_024741 | 1 | 0 | 1 | 0 | 0 | 1 |
| NM_024742 | 1 | 0 | 1 | 1 | 0 | 1 |

|           |   |   |   |   |   |   |
|-----------|---|---|---|---|---|---|
| NM_024743 | 1 | 1 | 1 | 1 | 0 | 1 |
| NM_024744 | 1 | 0 | 1 | 1 | 1 | 0 |
| NM_024745 | 1 | 1 | 1 | 0 | 0 | 0 |
| NM_024746 | 1 | 1 | 1 | 0 | 0 | 1 |
| NM_024747 | 1 | 0 | 1 | 1 | 0 | 0 |
| NM_024750 | 0 | 0 | 1 | 0 | 0 | 0 |
| NM_024751 | 1 | 0 | 1 | 1 | 1 | 1 |
| NM_024753 | 1 | 1 | 1 | 1 | 0 | 0 |
| NM_024754 | 1 | 0 | 1 | 1 | 1 | 1 |
| NM_024755 | 1 | 0 | 1 | 1 | 0 | 0 |
| NM_024756 | 1 | 0 | 1 | 1 | 0 | 1 |
| NM_024757 | 1 | 1 | 1 | 1 | 0 | 0 |
| NM_024758 | 1 | 0 | 0 | 0 | 0 | 1 |
| NM_024759 | 1 | 0 | 1 | 0 | 0 | 1 |
| NM_024760 | 1 | 0 | 1 | 0 | 0 | 0 |
| NM_024761 | 1 | 0 | 1 | 0 | 0 | 0 |
| NM_024762 | 1 | 0 | 1 | 1 | 0 | 0 |
| NM_024764 | 1 | 0 | 1 | 0 | 0 | 1 |
| NM_024765 | 1 | 0 | 1 | 0 | 0 | 1 |
| NM_024766 | 1 | 1 | 1 | 1 | 0 | 0 |
| NM_024767 | 1 | 0 | 1 | 0 | 0 | 0 |
| NM_024768 | 1 | 0 | 1 | 0 | 0 | 0 |
| NM_024769 | 1 | 0 | 1 | 1 | 0 | 0 |
| NM_024770 | 1 | 0 | 1 | 0 | 0 | 0 |
| NM_024771 | 1 | 0 | 1 | 1 | 0 | 0 |
| NM_024772 | 1 | 1 | 1 | 1 | 1 | 1 |
| NM_024773 | 1 | 0 | 1 | 1 | 0 | 0 |
| NM_024774 | 1 | 0 | 1 | 1 | 0 | 0 |
| NM_024775 | 1 | 1 | 1 | 1 | 0 | 0 |
| NM_024778 | 1 | 0 | 1 | 1 | 1 | 1 |
| NM_024779 | 1 | 0 | 1 | 0 | 0 | 1 |
| NM_024780 | 1 | 0 | 1 | 1 | 0 | 0 |
| NM_024781 | 1 | 0 | 1 | 1 | 0 | 1 |
| NM_024782 | 1 | 0 | 1 | 0 | 1 | 1 |
| NM_024783 | 1 | 1 | 1 | 1 | 1 | 1 |
| NM_024784 | 1 | 0 | 1 | 1 | 0 | 0 |
| NM_024785 | 1 | 1 | 1 | 1 | 0 | 1 |
| NM_024786 | 1 | 0 | 1 | 0 | 0 | 0 |
| NM_024787 | 1 | 1 | 1 | 1 | 0 | 1 |
| NM_024790 | 1 | 0 | 1 | 0 | 1 | 1 |
| NM_024791 | 1 | 0 | 1 | 1 | 1 | 1 |
| NM_024792 | 1 | 0 | 1 | 0 | 0 | 0 |
| NM_024793 | 1 | 1 | 1 | 1 | 0 | 1 |
| NM_024794 | 1 | 1 | 1 | 1 | 1 | 1 |
| NM_024796 | 1 | 0 | 1 | 0 | 1 | 1 |
| NM_024798 | 1 | 0 | 1 | 0 | 0 | 0 |
| NM_024800 | 1 | 1 | 1 | 0 | 0 | 1 |
| NM_024802 | 1 | 1 | 1 | 1 | 0 | 0 |
| NM_024804 | 1 | 0 | 1 | 0 | 0 | 0 |
| NM_024805 | 1 | 1 | 1 | 1 | 0 | 1 |
| NM_024806 | 1 | 1 | 1 | 1 | 0 | 0 |
| NM_024807 | 1 | 1 | 1 | 1 | 1 | 1 |

|           |   |   |   |   |   |   |
|-----------|---|---|---|---|---|---|
| NM_024808 | 1 | 0 | 1 | 0 | 0 | 1 |
| NM_024809 | 1 | 0 | 1 | 1 | 1 | 0 |
| NM_024810 | 1 | 0 | 1 | 0 | 1 | 1 |
| NM_024811 | 1 | 0 | 1 | 1 | 0 | 1 |
| NM_024812 | 1 | 1 | 1 | 1 | 0 | 0 |
| NM_024813 | 1 | 0 | 1 | 0 | 1 | 1 |
| NM_024814 | 1 | 1 | 1 | 1 | 0 | 0 |
| NM_024815 | 1 | 0 | 1 | 0 | 0 | 0 |
| NM_024816 | 1 | 0 | 1 | 1 | 0 | 0 |
| NM_024817 | 1 | 0 | 1 | 1 | 0 | 0 |
| NM_024818 | 1 | 0 | 1 | 1 | 1 | 1 |
| NM_024819 | 1 | 0 | 1 | 0 | 0 | 0 |
| NM_024820 | 1 | 1 | 1 | 1 | 0 | 0 |
| NM_024821 | 1 | 0 | 1 | 0 | 0 | 1 |
| NM_024823 | 0 | 0 | 0 | 0 | 0 | 1 |
| NM_024824 | 1 | 1 | 1 | 1 | 0 | 0 |
| NM_024825 | 0 | 0 | 0 | 0 | 0 | 1 |
| NM_024826 | 1 | 0 | 1 | 0 | 1 | 1 |
| NM_024827 | 1 | 0 | 1 | 1 | 0 | 0 |
| NM_024828 | 1 | 0 | 1 | 0 | 0 | 0 |
| NM_024829 | 1 | 1 | 1 | 1 | 1 | 1 |
| NM_024830 | 1 | 1 | 1 | 1 | 0 | 0 |
| NM_024831 | 1 | 0 | 1 | 0 | 0 | 0 |
| NM_024832 | 1 | 0 | 1 | 0 | 0 | 0 |
| NM_024833 | 1 | 0 | 1 | 1 | 1 | 0 |
| NM_024834 | 1 | 0 | 1 | 0 | 0 | 0 |
| NM_024835 | 1 | 0 | 1 | 0 | 0 | 0 |
| NM_024836 | 1 | 0 | 1 | 1 | 0 | 1 |
| NM_024837 | 1 | 1 | 1 | 0 | 0 | 0 |
| NM_024838 | 1 | 1 | 1 | 1 | 0 | 0 |
| NM_024839 | 1 | 0 | 1 | 0 | 0 | 0 |
| NM_024840 | 1 | 1 | 1 | 1 | 1 | 1 |
| NM_024841 | 1 | 0 | 1 | 1 | 1 | 1 |
| NM_024843 | 1 | 1 | 1 | 1 | 0 | 1 |
| NM_024844 | 1 | 0 | 1 | 1 | 0 | 0 |
| NM_024845 | 1 | 0 | 1 | 1 | 0 | 0 |
| NM_024846 | 1 | 0 | 1 | 0 | 0 | 1 |
| NM_024848 | 1 | 0 | 1 | 0 | 0 | 1 |
| NM_024850 | 1 | 1 | 1 | 1 | 0 | 1 |
| NM_024852 | 1 | 1 | 1 | 1 | 0 | 0 |
| NM_024854 | 1 | 0 | 1 | 0 | 1 | 1 |
| NM_024855 | 1 | 1 | 1 | 1 | 1 | 1 |
| NM_024857 | 1 | 0 | 1 | 1 | 0 | 0 |
| NM_024859 | 1 | 1 | 1 | 1 | 0 | 0 |
| NM_024860 | 1 | 0 | 1 | 1 | 1 | 1 |
| NM_024861 | 1 | 0 | 1 | 1 | 0 | 0 |
| NM_024862 | 1 | 0 | 1 | 0 | 0 | 0 |
| NM_024863 | 1 | 1 | 1 | 1 | 0 | 0 |
| NM_024864 | 1 | 0 | 1 | 1 | 0 | 0 |
| NM_024865 | 1 | 1 | 1 | 1 | 1 | 1 |
| NM_024866 | 1 | 0 | 1 | 1 | 0 | 0 |
| NM_024867 | 1 | 1 | 1 | 1 | 1 | 1 |

|           |   |   |   |   |   |   |
|-----------|---|---|---|---|---|---|
| NM_024868 | 1 | 0 | 1 | 1 | 0 | 0 |
| NM_024871 | 1 | 0 | 1 | 0 | 0 | 1 |
| NM_024872 | 1 | 0 | 1 | 1 | 0 | 1 |
| NM_024873 | 1 | 0 | 1 | 0 | 0 | 1 |
| NM_024874 | 1 | 1 | 1 | 1 | 1 | 1 |
| NM_024876 | 1 | 0 | 1 | 1 | 0 | 0 |
| NM_024877 | 1 | 0 | 1 | 1 | 0 | 0 |
| NM_024880 | 1 | 1 | 1 | 1 | 0 | 0 |
| NM_024881 | 1 | 1 | 1 | 0 | 0 | 0 |
| NM_024883 | 1 | 0 | 1 | 0 | 0 | 0 |
| NM_024884 | 1 | 0 | 1 | 0 | 0 | 0 |
| NM_024885 | 0 | 1 | 0 | 1 | 0 | 0 |
| NM_024886 | 1 | 0 | 1 | 0 | 0 | 0 |
| NM_024887 | 1 | 0 | 1 | 1 | 0 | 0 |
| NM_024888 | 1 | 0 | 0 | 0 | 0 | 1 |
| NM_024891 | 1 | 0 | 1 | 0 | 1 | 1 |
| NM_024892 | 1 | 1 | 1 | 1 | 0 | 0 |
| NM_024894 | 1 | 0 | 1 | 1 | 0 | 0 |
| NM_024895 | 1 | 1 | 1 | 1 | 1 | 0 |
| NM_024896 | 1 | 1 | 1 | 1 | 1 | 0 |
| NM_024897 | 1 | 0 | 1 | 1 | 0 | 1 |
| NM_024898 | 1 | 0 | 1 | 1 | 0 | 1 |
| NM_024899 | 1 | 0 | 1 | 0 | 0 | 1 |
| NM_024900 | 1 | 1 | 1 | 1 | 1 | 1 |
| NM_024901 | 1 | 0 | 1 | 1 | 0 | 0 |
| NM_024903 | 1 | 0 | 1 | 1 | 1 | 1 |
| NM_024907 | 1 | 0 | 1 | 0 | 0 | 1 |
| NM_024908 | 1 | 0 | 1 | 1 | 0 | 1 |
| NM_024909 | 1 | 1 | 1 | 1 | 0 | 0 |
| NM_024910 | 1 | 0 | 1 | 0 | 0 | 0 |
| NM_024911 | 1 | 1 | 1 | 1 | 0 | 0 |
| NM_024912 | 1 | 1 | 1 | 1 | 0 | 1 |
| NM_024913 | 0 | 0 | 0 | 0 | 0 | 1 |
| NM_024914 | 1 | 1 | 1 | 0 | 0 | 1 |
| NM_024915 | 0 | 0 | 1 | 0 | 0 | 0 |
| NM_024916 | 1 | 0 | 1 | 0 | 0 | 0 |
| NM_024917 | 1 | 0 | 1 | 0 | 0 | 1 |
| NM_024918 | 1 | 1 | 1 | 1 | 0 | 1 |
| NM_024920 | 1 | 0 | 1 | 0 | 0 | 0 |
| NM_024921 | 1 | 0 | 1 | 0 | 0 | 0 |
| NM_024922 | 1 | 0 | 1 | 1 | 0 | 1 |
| NM_024923 | 1 | 0 | 1 | 1 | 0 | 0 |
| NM_024926 | 1 | 0 | 1 | 1 | 1 | 1 |
| NM_024927 | 1 | 0 | 1 | 1 | 1 | 0 |
| NM_024928 | 1 | 1 | 1 | 0 | 1 | 1 |
| NM_024929 | 1 | 1 | 1 | 1 | 0 | 0 |
| NM_024934 | 1 | 0 | 1 | 1 | 0 | 0 |
| NM_024935 | 1 | 1 | 1 | 1 | 0 | 0 |
| NM_024937 | 1 | 0 | 1 | 0 | 0 | 1 |
| NM_024939 | 1 | 0 | 1 | 0 | 0 | 0 |
| NM_024940 | 1 | 1 | 1 | 1 | 0 | 1 |
| NM_024941 | 1 | 0 | 1 | 0 | 1 | 1 |

|           |   |   |   |   |   |   |
|-----------|---|---|---|---|---|---|
| NM_024942 | 1 | 0 | 1 | 1 | 1 | 0 |
| NM_024943 | 1 | 0 | 1 | 0 | 0 | 1 |
| NM_024944 | 1 | 0 | 1 | 0 | 0 | 0 |
| NM_024945 | 1 | 1 | 1 | 1 | 1 | 1 |
| NM_024946 | 1 | 0 | 1 | 0 | 0 | 0 |
| NM_024947 | 1 | 0 | 1 | 1 | 0 | 0 |
| NM_024948 | 1 | 1 | 1 | 1 | 0 | 0 |
| NM_024949 | 1 | 0 | 1 | 0 | 0 | 0 |
| NM_024952 | 1 | 0 | 1 | 1 | 1 | 1 |
| NM_024953 | 1 | 0 | 1 | 1 | 0 | 0 |
| NM_024954 | 1 | 1 | 1 | 1 | 1 | 1 |
| NM_024955 | 1 | 1 | 1 | 1 | 0 | 0 |
| NM_024956 | 1 | 0 | 1 | 0 | 1 | 0 |
| NM_024957 | 1 | 0 | 1 | 0 | 0 | 0 |
| NM_024958 | 1 | 0 | 1 | 1 | 0 | 1 |
| NM_024959 | 1 | 1 | 1 | 1 | 0 | 0 |
| NM_024960 | 1 | 1 | 1 | 1 | 0 | 0 |
| NM_024961 | 1 | 1 | 1 | 1 | 0 | 0 |
| NM_024963 | 1 | 0 | 1 | 1 | 0 | 0 |
| NM_024967 | 1 | 0 | 1 | 1 | 0 | 1 |
| NM_024970 | 1 | 1 | 1 | 1 | 0 | 1 |
| NM_024974 | 1 | 0 | 1 | 0 | 0 | 0 |
| NM_024976 | 1 | 0 | 1 | 0 | 0 | 1 |
| NM_024977 | 1 | 0 | 1 | 1 | 0 | 0 |
| NM_024978 | 1 | 0 | 1 | 0 | 0 | 1 |
| NM_024979 | 0 | 1 | 0 | 1 | 0 | 0 |
| NM_024980 | 1 | 0 | 1 | 0 | 0 | 0 |
| NM_024986 | 0 | 0 | 0 | 0 | 0 | 1 |
| NM_024988 | 1 | 1 | 1 | 1 | 0 | 0 |
| NM_024989 | 1 | 0 | 1 | 0 | 0 | 1 |
| NM_024992 | 1 | 0 | 1 | 0 | 0 | 1 |
| NM_024993 | 1 | 0 | 1 | 0 | 0 | 0 |
| NM_024994 | 1 | 0 | 1 | 0 | 0 | 0 |
| NM_024996 | 1 | 0 | 1 | 0 | 1 | 1 |
| NM_024997 | 1 | 0 | 1 | 1 | 0 | 0 |
| NM_024998 | 1 | 1 | 1 | 1 | 1 | 1 |
| NM_025000 | 1 | 0 | 1 | 0 | 1 | 1 |
| NM_025003 | 1 | 0 | 1 | 0 | 0 | 1 |
| NM_025004 | 1 | 1 | 1 | 1 | 1 | 1 |
| NM_025005 | 1 | 0 | 1 | 0 | 0 | 0 |
| NM_025008 | 1 | 0 | 0 | 0 | 0 | 1 |
| NM_025009 | 1 | 0 | 1 | 0 | 1 | 1 |
| NM_025010 | 1 | 0 | 1 | 0 | 0 | 0 |
| NM_025012 | 1 | 0 | 1 | 1 | 0 | 0 |
| NM_025021 | 1 | 0 | 1 | 0 | 0 | 0 |
| NM_025023 | 1 | 0 | 1 | 0 | 0 | 1 |
| NM_025024 | 1 | 1 | 1 | 0 | 0 | 0 |
| NM_025025 | 1 | 0 | 1 | 1 | 0 | 0 |
| NM_025026 | 1 | 1 | 1 | 1 | 0 | 1 |
| NM_025027 | 1 | 0 | 1 | 1 | 0 | 0 |
| NM_025029 | 1 | 0 | 1 | 0 | 0 | 0 |
| NM_025030 | 1 | 0 | 1 | 0 | 0 | 0 |



|           |   |   |   |   |   |   |
|-----------|---|---|---|---|---|---|
| NM_025031 | 1 | 0 | 0 | 0 | 0 | 1 |
| NM_025032 | 1 | 0 | 1 | 0 | 0 | 0 |
| NM_025034 | 1 | 1 | 1 | 1 | 0 | 0 |
| NM_025040 | 1 | 0 | 1 | 1 | 0 | 0 |
| NM_025041 | 1 | 0 | 0 | 0 | 0 | 0 |
| NM_025042 | 1 | 0 | 1 | 0 | 0 | 0 |
| NM_025044 | 1 | 0 | 1 | 0 | 0 | 0 |
| NM_025047 | 1 | 1 | 1 | 1 | 0 | 0 |
| NM_025049 | 1 | 0 | 1 | 0 | 0 | 0 |
| NM_025051 | 1 | 0 | 1 | 1 | 0 | 1 |
| NM_025054 | 1 | 0 | 1 | 0 | 1 | 1 |
| NM_025056 | 1 | 1 | 1 | 1 | 0 | 1 |
| NM_025057 | 1 | 1 | 1 | 0 | 1 | 1 |
| NM_025058 | 0 | 1 | 0 | 0 | 0 | 0 |
| NM_025059 | 1 | 1 | 1 | 1 | 0 | 0 |
| NM_025061 | 1 | 0 | 1 | 0 | 1 | 0 |
| NM_025065 | 1 | 0 | 1 | 1 | 0 | 1 |
| NM_025067 | 1 | 0 | 1 | 1 | 0 | 0 |
| NM_025069 | 1 | 1 | 1 | 1 | 0 | 0 |
| NM_025071 | 1 | 0 | 1 | 0 | 0 | 1 |
| NM_025072 | 1 | 1 | 1 | 1 | 0 | 0 |
| NM_025073 | 1 | 0 | 1 | 0 | 0 | 1 |
| NM_025074 | 0 | 0 | 0 | 0 | 0 | 1 |
| NM_025075 | 1 | 0 | 1 | 0 | 0 | 1 |
| NM_025076 | 1 | 0 | 1 | 1 | 0 | 1 |
| NM_025077 | 1 | 0 | 1 | 0 | 0 | 0 |
| NM_025078 | 1 | 0 | 1 | 0 | 1 | 0 |
| NM_025079 | 1 | 0 | 1 | 1 | 1 | 1 |
| NM_025080 | 1 | 1 | 1 | 1 | 1 | 1 |
| NM_025081 | 1 | 0 | 1 | 0 | 0 | 0 |
| NM_025082 | 1 | 0 | 1 | 0 | 0 | 0 |
| NM_025083 | 1 | 1 | 1 | 1 | 1 | 0 |
| NM_025084 | 1 | 0 | 1 | 1 | 0 | 1 |
| NM_025085 | 1 | 0 | 1 | 1 | 0 | 0 |
| NM_025086 | 1 | 1 | 1 | 1 | 0 | 0 |
| NM_025088 | 1 | 0 | 1 | 1 | 0 | 0 |
| NM_025090 | 1 | 1 | 1 | 1 | 0 | 0 |
| NM_025091 | 1 | 0 | 1 | 0 | 0 | 0 |
| NM_025092 | 1 | 0 | 1 | 0 | 0 | 0 |
| NM_025094 | 1 | 0 | 1 | 0 | 1 | 1 |
| NM_025095 | 1 | 0 | 1 | 1 | 0 | 1 |
| NM_025096 | 1 | 0 | 1 | 1 | 0 | 0 |
| NM_025097 | 1 | 0 | 1 | 0 | 0 | 0 |
| NM_025098 | 1 | 0 | 1 | 1 | 0 | 0 |
| NM_025099 | 1 | 1 | 1 | 1 | 1 | 1 |
| NM_025100 | 1 | 1 | 1 | 1 | 1 | 1 |
| NM_025103 | 1 | 0 | 1 | 1 | 0 | 0 |
| NM_025104 | 1 | 0 | 1 | 1 | 0 | 0 |
| NM_025105 | 1 | 1 | 1 | 1 | 1 | 1 |
| NM_025106 | 1 | 0 | 1 | 1 | 0 | 0 |
| NM_025107 | 1 | 1 | 1 | 1 | 0 | 0 |
| NM_025108 | 1 | 0 | 1 | 0 | 1 | 1 |

|           |   |   |   |   |   |   |
|-----------|---|---|---|---|---|---|
| NM_025109 | 1 | 0 | 1 | 1 | 0 | 0 |
| NM_025113 | 1 | 1 | 1 | 1 | 0 | 1 |
| NM_025114 | 1 | 0 | 1 | 1 | 1 | 1 |
| NM_025115 | 1 | 0 | 1 | 0 | 0 | 0 |
| NM_025117 | 1 | 0 | 1 | 0 | 0 | 0 |
| NM_025118 | 1 | 1 | 1 | 1 | 0 | 0 |
| NM_025124 | 1 | 1 | 1 | 1 | 1 | 1 |
| NM_025125 | 1 | 1 | 1 | 1 | 1 | 1 |
| NM_025126 | 1 | 0 | 1 | 1 | 0 | 1 |
| NM_025128 | 1 | 1 | 1 | 1 | 0 | 1 |
| NM_025129 | 1 | 0 | 1 | 1 | 0 | 0 |
| NM_025130 | 1 | 0 | 1 | 1 | 0 | 0 |
| NM_025132 | 1 | 1 | 1 | 1 | 1 | 1 |
| NM_025133 | 1 | 0 | 1 | 1 | 0 | 0 |
| NM_025134 | 1 | 0 | 0 | 0 | 0 | 1 |
| NM_025135 | 1 | 0 | 1 | 0 | 0 | 1 |
| NM_025136 | 1 | 0 | 0 | 0 | 0 | 1 |
| NM_025137 | 1 | 0 | 1 | 0 | 0 | 0 |
| NM_025139 | 1 | 0 | 1 | 0 | 0 | 1 |
| NM_025140 | 1 | 0 | 1 | 1 | 1 | 0 |
| NM_025143 | 1 | 0 | 1 | 0 | 0 | 1 |
| NM_025144 | 1 | 0 | 1 | 0 | 0 | 0 |
| NM_025145 | 1 | 1 | 1 | 1 | 0 | 0 |
| NM_025146 | 1 | 0 | 1 | 1 | 0 | 0 |
| NM_025147 | 1 | 0 | 1 | 1 | 0 | 0 |
| NM_025149 | 1 | 1 | 1 | 1 | 1 | 1 |
| NM_025150 | 1 | 0 | 1 | 0 | 0 | 0 |
| NM_025151 | 1 | 1 | 1 | 1 | 0 | 0 |
| NM_025152 | 1 | 0 | 1 | 0 | 0 | 0 |
| NM_025155 | 1 | 1 | 1 | 1 | 1 | 1 |
| NM_025158 | 1 | 0 | 1 | 1 | 0 | 0 |
| NM_025159 | 1 | 0 | 1 | 0 | 1 | 1 |
| NM_025160 | 1 | 1 | 1 | 1 | 0 | 0 |
| NM_025161 | 1 | 0 | 1 | 1 | 1 | 1 |
| NM_025163 | 1 | 0 | 1 | 0 | 0 | 0 |
| NM_025164 | 1 | 1 | 1 | 1 | 0 | 0 |
| NM_025165 | 1 | 0 | 1 | 0 | 0 | 1 |
| NM_025168 | 1 | 0 | 1 | 0 | 0 | 1 |
| NM_025176 | 1 | 0 | 1 | 1 | 1 | 0 |
| NM_025180 | 1 | 1 | 1 | 1 | 1 | 1 |
| NM_025181 | 1 | 1 | 1 | 1 | 0 | 0 |
| NM_025182 | 1 | 1 | 1 | 1 | 1 | 1 |
| NM_025184 | 1 | 0 | 1 | 1 | 1 | 1 |
| NM_025185 | 1 | 0 | 1 | 1 | 1 | 1 |
| NM_025187 | 1 | 1 | 1 | 1 | 0 | 0 |
| NM_025188 | 1 | 0 | 1 | 0 | 0 | 0 |
| NM_025189 | 1 | 0 | 1 | 0 | 0 | 0 |
| NM_025191 | 1 | 0 | 1 | 1 | 0 | 0 |
| NM_025193 | 1 | 1 | 1 | 1 | 0 | 0 |
| NM_025194 | 1 | 0 | 1 | 0 | 0 | 0 |
| NM_025195 | 1 | 0 | 1 | 1 | 0 | 0 |
| NM_025196 | 1 | 1 | 1 | 1 | 0 | 1 |

|           |   |   |   |   |   |   |
|-----------|---|---|---|---|---|---|
| NM_025198 | 1 | 0 | 1 | 0 | 0 | 1 |
| NM_025199 | 0 | 0 | 0 | 1 | 0 | 0 |
| NM_025201 | 1 | 1 | 1 | 1 | 1 | 1 |
| NM_025202 | 1 | 0 | 1 | 0 | 0 | 0 |
| NM_025203 | 1 | 1 | 1 | 1 | 0 | 0 |
| NM_025204 | 1 | 1 | 1 | 1 | 0 | 1 |
| NM_025205 | 1 | 0 | 1 | 0 | 0 | 0 |
| NM_025206 | 1 | 1 | 1 | 1 | 0 | 0 |
| NM_025207 | 1 | 0 | 1 | 1 | 0 | 0 |
| NM_025208 | 1 | 0 | 1 | 0 | 1 | 1 |
| NM_025209 | 1 | 0 | 1 | 0 | 0 | 1 |
| NM_025210 | 0 | 0 | 0 | 0 | 0 | 1 |
| NM_025211 | 1 | 1 | 1 | 1 | 1 | 1 |
| NM_025212 | 1 | 1 | 1 | 1 | 1 | 0 |
| NM_025213 | 0 | 0 | 0 | 0 | 0 | 1 |
| NM_025214 | 1 | 0 | 1 | 0 | 0 | 1 |
| NM_025215 | 1 | 1 | 1 | 1 | 0 | 0 |
| NM_025216 | 1 | 0 | 1 | 0 | 0 | 0 |
| NM_025217 | 1 | 1 | 1 | 0 | 0 | 1 |
| NM_025218 | 0 | 0 | 0 | 1 | 0 | 0 |
| NM_025220 | 1 | 0 | 1 | 0 | 0 | 0 |
| NM_025222 | 1 | 0 | 1 | 0 | 0 | 0 |
| NM_025225 | 1 | 0 | 1 | 1 | 0 | 0 |
| NM_025227 | 1 | 0 | 0 | 0 | 0 | 1 |
| NM_025228 | 1 | 1 | 1 | 1 | 0 | 1 |
| NM_025230 | 1 | 0 | 1 | 0 | 0 | 1 |
| NM_025231 | 1 | 1 | 1 | 1 | 1 | 1 |
| NM_025232 | 1 | 1 | 1 | 1 | 0 | 0 |
| NM_025233 | 1 | 0 | 1 | 0 | 0 | 0 |
| NM_025234 | 1 | 1 | 1 | 1 | 0 | 0 |
| NM_025235 | 1 | 0 | 1 | 0 | 0 | 1 |
| NM_025236 | 1 | 1 | 1 | 1 | 1 | 0 |
| NM_025238 | 1 | 0 | 1 | 0 | 1 | 0 |
| NM_025239 | 1 | 1 | 1 | 0 | 0 | 0 |
| NM_025240 | 1 | 0 | 1 | 0 | 0 | 0 |
| NM_025241 | 1 | 0 | 1 | 0 | 0 | 1 |
| NM_025244 | 1 | 0 | 1 | 0 | 0 | 1 |
| NM_025245 | 1 | 1 | 1 | 1 | 1 | 1 |
| NM_025246 | 1 | 0 | 1 | 1 | 0 | 1 |
| NM_025247 | 0 | 1 | 0 | 1 | 0 | 0 |
| NM_025252 | 1 | 0 | 1 | 0 | 0 | 0 |
| NM_025256 | 1 | 0 | 1 | 1 | 0 | 0 |
| NM_025258 | 1 | 0 | 1 | 0 | 0 | 0 |
| NM_025260 | 0 | 0 | 0 | 0 | 0 | 1 |
| NM_025261 | 1 | 0 | 1 | 1 | 0 | 0 |
| NM_025262 | 1 | 0 | 1 | 0 | 0 | 0 |
| NM_025263 | 1 | 0 | 1 | 0 | 1 | 1 |
| NM_025264 | 1 | 0 | 1 | 1 | 0 | 0 |
| NM_025265 | 1 | 0 | 1 | 1 | 1 | 1 |
| NM_025267 | 1 | 0 | 1 | 1 | 1 | 1 |
| NM_025268 | 1 | 1 | 1 | 1 | 0 | 1 |
| NM_030567 | 1 | 0 | 1 | 0 | 0 | 1 |

|           |   |   |   |   |   |   |
|-----------|---|---|---|---|---|---|
| NM_030568 | 1 | 1 | 1 | 0 | 0 | 0 |
| NM_030571 | 1 | 1 | 1 | 1 | 0 | 0 |
| NM_030572 | 1 | 0 | 1 | 0 | 0 | 0 |
| NM_030573 | 1 | 0 | 1 | 1 | 0 | 0 |
| NM_030574 | 1 | 1 | 1 | 1 | 0 | 1 |
| NM_030575 | 1 | 1 | 1 | 1 | 0 | 0 |
| NM_030576 | 1 | 0 | 1 | 0 | 0 | 1 |
| NM_030577 | 1 | 0 | 1 | 1 | 0 | 0 |
| NM_030578 | 1 | 0 | 1 | 1 | 0 | 0 |
| NM_030579 | 1 | 0 | 1 | 1 | 0 | 0 |
| NM_030580 | 1 | 1 | 1 | 1 | 0 | 0 |
| NM_030582 | 1 | 0 | 1 | 1 | 1 | 1 |
| NM_030590 | 1 | 0 | 1 | 1 | 0 | 0 |
| NM_030594 | 0 | 0 | 0 | 0 | 0 | 1 |
| NM_030613 | 1 | 0 | 1 | 0 | 0 | 0 |
| NM_030615 | 1 | 0 | 1 | 0 | 0 | 0 |
| NM_030621 | 1 | 1 | 1 | 1 | 0 | 1 |
| NM_030622 | 1 | 0 | 1 | 0 | 0 | 0 |
| NM_030627 | 1 | 1 | 1 | 1 | 1 | 1 |
| NM_030629 | 1 | 1 | 1 | 1 | 0 | 1 |
| NM_030630 | 1 | 1 | 1 | 1 | 0 | 0 |
| NM_030633 | 0 | 0 | 1 | 0 | 0 | 0 |
| NM_030634 | 1 | 1 | 1 | 1 | 0 | 0 |
| NM_030636 | 1 | 1 | 1 | 0 | 0 | 0 |
| NM_030642 | 0 | 0 | 1 | 0 | 0 | 0 |
| NM_030643 | 1 | 0 | 1 | 0 | 0 | 1 |
| NM_030644 | 1 | 0 | 1 | 0 | 0 | 1 |
| NM_030645 | 1 | 1 | 1 | 1 | 0 | 1 |
| NM_030648 | 0 | 1 | 0 | 0 | 0 | 0 |
| NM_030649 | 1 | 1 | 1 | 0 | 0 | 1 |
| NM_030651 | 1 | 1 | 1 | 1 | 0 | 0 |
| NM_030652 | 1 | 0 | 1 | 0 | 0 | 0 |
| NM_030653 | 1 | 1 | 1 | 1 | 0 | 0 |
| NM_030655 | 1 | 0 | 1 | 1 | 0 | 0 |
| NM_030657 | 1 | 1 | 1 | 1 | 1 | 0 |
| NM_030658 | 1 | 1 | 1 | 1 | 0 | 0 |
| NM_030662 | 1 | 0 | 1 | 0 | 0 | 0 |
| NM_030663 | 1 | 0 | 1 | 1 | 0 | 0 |
| NM_030664 | 1 | 0 | 1 | 0 | 0 | 0 |
| NM_030665 | 1 | 0 | 0 | 0 | 0 | 1 |
| NM_030666 | 1 | 1 | 1 | 1 | 0 | 0 |
| NM_030673 | 1 | 1 | 1 | 1 | 0 | 0 |
| NM_030674 | 1 | 0 | 1 | 1 | 1 | 1 |
| NM_030751 | 1 | 0 | 1 | 0 | 0 | 1 |
| NM_030752 | 1 | 0 | 1 | 1 | 0 | 0 |
| NM_030753 | 1 | 0 | 1 | 0 | 0 | 0 |
| NM_030754 | 1 | 0 | 1 | 0 | 0 | 0 |
| NM_030755 | 1 | 1 | 1 | 1 | 1 | 1 |
| NM_030756 | 1 | 1 | 1 | 1 | 0 | 0 |
| NM_030757 | 1 | 1 | 1 | 1 | 0 | 0 |
| NM_030758 | 1 | 0 | 1 | 1 | 0 | 0 |
| NM_030759 | 1 | 1 | 1 | 1 | 1 | 1 |

|           |   |   |   |   |   |   |
|-----------|---|---|---|---|---|---|
| NM_030760 | 1 | 1 | 1 | 1 | 1 | 1 |
| NM_030761 | 1 | 0 | 1 | 0 | 0 | 0 |
| NM_030762 | 1 | 0 | 1 | 0 | 0 | 0 |
| NM_030763 | 1 | 1 | 1 | 1 | 0 | 0 |
| NM_030764 | 1 | 0 | 1 | 0 | 1 | 1 |
| NM_030765 | 1 | 0 | 0 | 0 | 0 | 1 |
| NM_030767 | 1 | 0 | 1 | 1 | 0 | 0 |
| NM_030768 | 1 | 1 | 1 | 1 | 0 | 0 |
| NM_030769 | 1 | 1 | 1 | 1 | 0 | 1 |
| NM_030770 | 1 | 0 | 1 | 1 | 1 | 0 |
| NM_030772 | 0 | 0 | 1 | 0 | 0 | 0 |
| NM_030773 | 1 | 0 | 1 | 1 | 0 | 1 |
| NM_030774 | 1 | 0 | 0 | 0 | 0 | 1 |
| NM_030776 | 1 | 1 | 1 | 1 | 0 | 0 |
| NM_030778 | 1 | 0 | 1 | 1 | 1 | 1 |
| NM_030779 | 1 | 0 | 1 | 1 | 0 | 0 |
| NM_030780 | 1 | 0 | 1 | 0 | 1 | 1 |
| NM_030781 | 1 | 1 | 1 | 1 | 0 | 0 |
| NM_030782 | 1 | 1 | 1 | 1 | 0 | 1 |
| NM_030783 | 1 | 1 | 1 | 1 | 0 | 1 |
| NM_030784 | 1 | 1 | 1 | 0 | 0 | 1 |
| NM_030785 | 1 | 0 | 0 | 0 | 0 | 1 |
| NM_030786 | 1 | 0 | 1 | 0 | 0 | 0 |
| NM_030788 | 1 | 0 | 1 | 0 | 0 | 0 |
| NM_030790 | 1 | 0 | 1 | 0 | 0 | 0 |
| NM_030791 | 1 | 0 | 1 | 0 | 0 | 0 |
| NM_030792 | 1 | 0 | 1 | 0 | 0 | 0 |
| NM_030793 | 1 | 0 | 1 | 0 | 0 | 1 |
| NM_030794 | 1 | 1 | 1 | 1 | 1 | 1 |
| NM_030795 | 0 | 0 | 0 | 0 | 0 | 1 |
| NM_030796 | 1 | 1 | 1 | 0 | 0 | 0 |
| NM_030797 | 1 | 1 | 1 | 1 | 0 | 1 |
| NM_030798 | 1 | 1 | 1 | 1 | 0 | 1 |
| NM_030799 | 1 | 0 | 1 | 0 | 0 | 0 |
| NM_030800 | 1 | 0 | 1 | 1 | 0 | 0 |
| NM_030801 | 1 | 1 | 1 | 1 | 0 | 0 |
| NM_030802 | 1 | 1 | 1 | 1 | 0 | 0 |
| NM_030803 | 1 | 0 | 1 | 0 | 1 | 1 |
| NM_030804 | 1 | 0 | 1 | 0 | 0 | 0 |
| NM_030805 | 1 | 0 | 1 | 1 | 0 | 0 |
| NM_030806 | 1 | 1 | 1 | 1 | 1 | 1 |
| NM_030807 | 1 | 0 | 1 | 1 | 1 | 1 |
| NM_030808 | 1 | 1 | 1 | 1 | 1 | 1 |
| NM_030809 | 1 | 0 | 1 | 0 | 0 | 0 |
| NM_030810 | 1 | 1 | 1 | 1 | 0 | 1 |
| NM_030811 | 1 | 1 | 1 | 1 | 0 | 1 |
| NM_030814 | 1 | 1 | 1 | 0 | 0 | 0 |
| NM_030815 | 1 | 0 | 1 | 0 | 1 | 0 |
| NM_030816 | 1 | 0 | 1 | 1 | 1 | 1 |
| NM_030817 | 1 | 1 | 1 | 0 | 0 | 1 |
| NM_030818 | 1 | 0 | 1 | 1 | 1 | 0 |
| NM_030819 | 1 | 1 | 1 | 1 | 1 | 1 |

|           |   |   |   |   |   |   |
|-----------|---|---|---|---|---|---|
| NM_030821 | 1 | 0 | 1 | 1 | 0 | 0 |
| NM_030824 | 1 | 1 | 1 | 1 | 1 | 1 |
| NM_030876 | 1 | 0 | 1 | 0 | 0 | 1 |
| NM_030877 | 1 | 0 | 1 | 1 | 0 | 1 |
| NM_030881 | 1 | 0 | 1 | 0 | 0 | 1 |
| NM_030882 | 1 | 0 | 1 | 1 | 1 | 1 |
| NM_030884 | 1 | 0 | 1 | 1 | 0 | 0 |
| NM_030893 | 1 | 0 | 1 | 0 | 0 | 0 |
| NM_030895 | 1 | 0 | 1 | 1 | 0 | 0 |
| NM_030905 | 0 | 0 | 0 | 0 | 0 | 1 |
| NM_030906 | 1 | 0 | 1 | 0 | 0 | 0 |
| NM_030907 | 1 | 1 | 1 | 1 | 1 | 0 |
| NM_030908 | 0 | 0 | 0 | 0 | 0 | 1 |
| NM_030911 | 1 | 0 | 1 | 0 | 0 | 0 |
| NM_030912 | 1 | 1 | 1 | 1 | 0 | 0 |
| NM_030913 | 1 | 0 | 1 | 0 | 0 | 0 |
| NM_030914 | 1 | 1 | 1 | 1 | 0 | 0 |
| NM_030915 | 1 | 1 | 1 | 1 | 0 | 0 |
| NM_030917 | 1 | 0 | 1 | 0 | 0 | 0 |
| NM_030918 | 1 | 1 | 1 | 1 | 0 | 0 |
| NM_030919 | 1 | 0 | 1 | 0 | 0 | 1 |
| NM_030920 | 1 | 0 | 1 | 1 | 0 | 1 |
| NM_030921 | 1 | 0 | 1 | 0 | 0 | 0 |
| NM_030922 | 1 | 0 | 1 | 0 | 0 | 0 |
| NM_030923 | 1 | 0 | 1 | 0 | 0 | 0 |
| NM_030924 | 1 | 1 | 1 | 1 | 0 | 0 |
| NM_030925 | 1 | 0 | 1 | 0 | 0 | 0 |
| NM_030926 | 1 | 1 | 1 | 1 | 0 | 0 |
| NM_030927 | 1 | 0 | 1 | 1 | 0 | 1 |
| NM_030928 | 1 | 0 | 1 | 0 | 0 | 0 |
| NM_030930 | 1 | 1 | 1 | 1 | 1 | 1 |
| NM_030931 | 1 | 0 | 1 | 0 | 0 | 1 |
| NM_030932 | 1 | 1 | 1 | 1 | 0 | 0 |
| NM_030933 | 0 | 0 | 0 | 1 | 0 | 0 |
| NM_030934 | 1 | 1 | 1 | 1 | 0 | 1 |
| NM_030935 | 1 | 0 | 1 | 0 | 1 | 1 |
| NM_030936 | 1 | 1 | 1 | 0 | 1 | 1 |
| NM_030937 | 1 | 1 | 1 | 1 | 0 | 0 |
| NM_030938 | 1 | 1 | 1 | 1 | 0 | 0 |
| NM_030939 | 1 | 1 | 1 | 1 | 0 | 0 |
| NM_030940 | 1 | 0 | 1 | 0 | 0 | 0 |
| NM_030941 | 1 | 0 | 1 | 1 | 0 | 1 |
| NM_030943 | 1 | 0 | 1 | 1 | 0 | 1 |
| NM_030944 | 1 | 0 | 1 | 0 | 0 | 0 |
| NM_030945 | 1 | 0 | 1 | 1 | 1 | 1 |
| NM_030949 | 1 | 0 | 1 | 1 | 0 | 0 |
| NM_030952 | 1 | 1 | 1 | 1 | 1 | 1 |
| NM_030953 | 1 | 0 | 1 | 0 | 1 | 1 |
| NM_030954 | 1 | 0 | 1 | 0 | 0 | 0 |
| NM_030956 | 1 | 0 | 1 | 0 | 0 | 1 |
| NM_030957 | 1 | 1 | 1 | 0 | 0 | 1 |
| NM_030958 | 1 | 1 | 1 | 0 | 0 | 0 |

|           |   |   |   |   |   |   |
|-----------|---|---|---|---|---|---|
| NM_030960 | 1 | 0 | 0 | 0 | 0 | 0 |
| NM_030961 | 1 | 0 | 1 | 1 | 0 | 1 |
| NM_030962 | 1 | 0 | 1 | 0 | 0 | 0 |
| NM_030963 | 1 | 0 | 1 | 0 | 0 | 1 |
| NM_030964 | 1 | 0 | 1 | 0 | 0 | 0 |
| NM_030966 | 0 | 0 | 0 | 0 | 0 | 1 |
| NM_030967 | 0 | 0 | 0 | 0 | 0 | 1 |
| NM_030968 | 1 | 0 | 1 | 0 | 0 | 0 |
| NM_030969 | 1 | 1 | 1 | 1 | 0 | 0 |
| NM_030970 | 1 | 1 | 1 | 1 | 1 | 1 |
| NM_030971 | 1 | 0 | 1 | 1 | 0 | 0 |
| NM_030972 | 1 | 0 | 1 | 0 | 0 | 1 |
| NM_030973 | 1 | 1 | 1 | 1 | 0 | 0 |
| NM_030974 | 1 | 1 | 1 | 0 | 0 | 1 |
| NM_030978 | 1 | 1 | 1 | 1 | 0 | 0 |
| NM_030979 | 1 | 0 | 1 | 0 | 1 | 1 |
| NM_030980 | 1 | 0 | 1 | 0 | 0 | 0 |
| NM_030981 | 1 | 0 | 1 | 0 | 0 | 0 |
| NM_031200 | 1 | 1 | 1 | 0 | 1 | 1 |
| NM_031206 | 1 | 1 | 1 | 1 | 0 | 1 |
| NM_031207 | 1 | 1 | 1 | 1 | 1 | 1 |
| NM_031208 | 1 | 1 | 1 | 1 | 0 | 0 |
| NM_031209 | 1 | 0 | 1 | 0 | 0 | 0 |
| NM_031210 | 1 | 1 | 1 | 1 | 1 | 0 |
| NM_031211 | 1 | 1 | 1 | 0 | 0 | 1 |
| NM_031212 | 1 | 1 | 1 | 0 | 1 | 1 |
| NM_031213 | 1 | 1 | 1 | 1 | 0 | 0 |
| NM_031214 | 1 | 0 | 1 | 1 | 1 | 1 |
| NM_031216 | 1 | 1 | 1 | 1 | 0 | 1 |
| NM_031217 | 1 | 1 | 1 | 1 | 1 | 1 |
| NM_031218 | 1 | 0 | 1 | 0 | 1 | 1 |
| NM_031219 | 1 | 1 | 1 | 1 | 0 | 0 |
| NM_031220 | 1 | 0 | 1 | 0 | 0 | 0 |
| NM_031231 | 1 | 0 | 1 | 0 | 1 | 0 |
| NM_031232 | 1 | 0 | 1 | 1 | 0 | 0 |
| NM_031243 | 1 | 0 | 1 | 1 | 0 | 0 |
| NM_031244 | 1 | 0 | 1 | 1 | 0 | 0 |
| NM_031246 | 1 | 1 | 0 | 1 | 0 | 0 |
| NM_031266 | 1 | 1 | 1 | 1 | 0 | 0 |
| NM_031271 | 1 | 1 | 1 | 1 | 0 | 0 |
| NM_031272 | 1 | 0 | 1 | 0 | 0 | 0 |
| NM_031273 | 0 | 1 | 0 | 0 | 0 | 1 |
| NM_031274 | 0 | 0 | 1 | 0 | 0 | 0 |
| NM_031275 | 0 | 0 | 1 | 1 | 0 | 0 |
| NM_031276 | 0 | 0 | 0 | 0 | 0 | 1 |
| NM_031277 | 1 | 1 | 1 | 1 | 0 | 1 |
| NM_031278 | 1 | 1 | 0 | 0 | 0 | 1 |
| NM_031279 | 0 | 0 | 0 | 0 | 0 | 1 |
| NM_031280 | 1 | 0 | 1 | 0 | 0 | 1 |
| NM_031281 | 1 | 0 | 1 | 1 | 0 | 0 |
| NM_031283 | 1 | 0 | 1 | 0 | 0 | 0 |
| NM_031284 | 1 | 0 | 1 | 0 | 0 | 1 |

|           |   |   |   |   |   |   |
|-----------|---|---|---|---|---|---|
| NM_031285 | 1 | 0 | 1 | 1 | 0 | 0 |
| NM_031286 | 1 | 1 | 1 | 1 | 0 | 1 |
| NM_031287 | 0 | 1 | 1 | 1 | 0 | 0 |
| NM_031288 | 1 | 0 | 1 | 0 | 0 | 0 |
| NM_031289 | 1 | 0 | 1 | 0 | 0 | 0 |
| NM_031290 | 1 | 1 | 1 | 1 | 0 | 0 |
| NM_031291 | 1 | 1 | 1 | 1 | 0 | 0 |
| NM_031292 | 1 | 0 | 1 | 0 | 0 | 0 |
| NM_031293 | 1 | 0 | 1 | 1 | 0 | 0 |
| NM_031294 | 1 | 0 | 1 | 0 | 0 | 0 |
| NM_031295 | 1 | 0 | 1 | 0 | 0 | 1 |
| NM_031296 | 1 | 1 | 1 | 1 | 0 | 1 |
| NM_031297 | 1 | 0 | 1 | 0 | 0 | 1 |
| NM_031298 | 1 | 1 | 1 | 1 | 1 | 1 |
| NM_031299 | 1 | 0 | 1 | 0 | 1 | 1 |
| NM_031300 | 1 | 1 | 1 | 1 | 1 | 1 |
| NM_031301 | 1 | 0 | 1 | 1 | 1 | 1 |
| NM_031302 | 1 | 1 | 1 | 1 | 0 | 1 |
| NM_031304 | 1 | 1 | 1 | 1 | 0 | 1 |
| NM_031305 | 1 | 1 | 1 | 0 | 0 | 1 |
| NM_031307 | 1 | 1 | 1 | 1 | 0 | 0 |
| NM_031308 | 1 | 1 | 1 | 1 | 0 | 1 |
| NM_031309 | 1 | 0 | 1 | 0 | 0 | 0 |
| NM_031310 | 1 | 0 | 1 | 1 | 0 | 1 |
| NM_031313 | 1 | 0 | 1 | 1 | 1 | 1 |
| NM_031362 | 1 | 0 | 1 | 0 | 0 | 0 |
| NM_031370 | 1 | 0 | 1 | 0 | 1 | 1 |
| NM_031372 | 1 | 1 | 1 | 1 | 0 | 0 |
| NM_031407 | 1 | 1 | 1 | 1 | 1 | 1 |
| NM_031409 | 1 | 0 | 1 | 0 | 0 | 0 |
| NM_031412 | 1 | 1 | 1 | 1 | 0 | 1 |
| NM_031413 | 1 | 1 | 1 | 1 | 0 | 0 |
| NM_031415 | 1 | 0 | 1 | 1 | 0 | 1 |
| NM_031416 | 1 | 0 | 1 | 0 | 0 | 0 |
| NM_031417 | 1 | 0 | 1 | 1 | 0 | 0 |
| NM_031418 | 0 | 0 | 0 | 1 | 0 | 0 |
| NM_031419 | 1 | 0 | 1 | 0 | 1 | 1 |
| NM_031420 | 1 | 0 | 1 | 1 | 0 | 0 |
| NM_031421 | 1 | 0 | 1 | 0 | 0 | 0 |
| NM_031422 | 1 | 0 | 1 | 0 | 0 | 0 |
| NM_031423 | 1 | 1 | 1 | 0 | 0 | 1 |
| NM_031424 | 1 | 0 | 1 | 0 | 0 | 0 |
| NM_031425 | 1 | 1 | 1 | 1 | 0 | 0 |
| NM_031426 | 1 | 0 | 1 | 0 | 0 | 0 |
| NM_031427 | 1 | 0 | 0 | 0 | 0 | 1 |
| NM_031429 | 1 | 0 | 1 | 0 | 0 | 0 |
| NM_031430 | 1 | 0 | 1 | 0 | 0 | 0 |
| NM_031431 | 1 | 0 | 1 | 0 | 0 | 0 |
| NM_031432 | 1 | 0 | 1 | 1 | 0 | 1 |
| NM_031433 | 1 | 1 | 1 | 1 | 0 | 1 |
| NM_031434 | 1 | 1 | 1 | 1 | 0 | 0 |
| NM_031435 | 1 | 0 | 1 | 0 | 0 | 0 |



|           |   |   |   |   |   |   |
|-----------|---|---|---|---|---|---|
| NM_031436 | 1 | 1 | 1 | 1 | 0 | 0 |
| NM_031437 | 1 | 0 | 1 | 1 | 0 | 1 |
| NM_031438 | 1 | 0 | 1 | 1 | 1 | 1 |
| NM_031439 | 1 | 0 | 1 | 0 | 1 | 1 |
| NM_031443 | 1 | 0 | 1 | 1 | 0 | 0 |
| NM_031445 | 1 | 0 | 1 | 0 | 0 | 0 |
| NM_031446 | 1 | 0 | 1 | 0 | 0 | 1 |
| NM_031447 | 1 | 1 | 1 | 1 | 0 | 0 |
| NM_031448 | 1 | 0 | 1 | 1 | 0 | 0 |
| NM_031450 | 1 | 0 | 1 | 0 | 1 | 1 |
| NM_031451 | 1 | 0 | 1 | 0 | 0 | 1 |
| NM_031452 | 1 | 0 | 1 | 1 | 0 | 0 |
| NM_031453 | 1 | 1 | 1 | 1 | 0 | 0 |
| NM_031454 | 1 | 1 | 1 | 0 | 0 | 0 |
| NM_031455 | 1 | 0 | 0 | 0 | 0 | 1 |
| NM_031456 | 1 | 0 | 0 | 0 | 0 | 0 |
| NM_031458 | 1 | 0 | 1 | 0 | 0 | 0 |
| NM_031459 | 1 | 1 | 1 | 1 | 0 | 1 |
| NM_031460 | 1 | 0 | 1 | 0 | 0 | 0 |
| NM_031461 | 1 | 0 | 1 | 1 | 0 | 1 |
| NM_031462 | 1 | 1 | 1 | 1 | 0 | 0 |
| NM_031463 | 1 | 1 | 1 | 1 | 0 | 1 |
| NM_031464 | 1 | 0 | 1 | 0 | 0 | 1 |
| NM_031465 | 1 | 0 | 1 | 1 | 0 | 0 |
| NM_031466 | 1 | 0 | 1 | 0 | 0 | 1 |
| NM_031467 | 1 | 0 | 1 | 0 | 0 | 0 |
| NM_031469 | 1 | 0 | 1 | 0 | 1 | 1 |
| NM_031471 | 1 | 1 | 1 | 1 | 1 | 1 |
| NM_031472 | 1 | 1 | 1 | 1 | 0 | 0 |
| NM_031473 | 0 | 0 | 1 | 0 | 0 | 0 |
| NM_031474 | 1 | 1 | 1 | 1 | 0 | 0 |
| NM_031475 | 1 | 0 | 1 | 0 | 0 | 0 |
| NM_031476 | 1 | 1 | 1 | 1 | 1 | 1 |
| NM_031477 | 1 | 0 | 1 | 1 | 0 | 0 |
| NM_031478 | 1 | 0 | 1 | 0 | 0 | 0 |
| NM_031479 | 1 | 0 | 1 | 1 | 1 | 0 |
| NM_031481 | 0 | 1 | 0 | 1 | 0 | 0 |
| NM_031482 | 1 | 0 | 1 | 1 | 0 | 0 |
| NM_031483 | 1 | 0 | 1 | 0 | 0 | 0 |
| NM_031484 | 1 | 1 | 1 | 1 | 0 | 1 |
| NM_031485 | 1 | 1 | 1 | 1 | 0 | 0 |
| NM_031488 | 1 | 0 | 1 | 0 | 0 | 0 |
| NM_031490 | 1 | 0 | 1 | 1 | 0 | 0 |
| NM_031491 | 1 | 1 | 1 | 1 | 0 | 0 |
| NM_031492 | 1 | 1 | 1 | 1 | 0 | 0 |
| NM_031496 | 1 | 0 | 0 | 0 | 0 | 0 |
| NM_031497 | 0 | 0 | 0 | 0 | 0 | 1 |
| NM_031498 | 1 | 0 | 1 | 1 | 0 | 0 |
| NM_031501 | 1 | 0 | 1 | 1 | 0 | 0 |
| NM_031852 | 1 | 0 | 0 | 0 | 0 | 1 |
| NM_031854 | 0 | 0 | 0 | 0 | 0 | 1 |
| NM_031856 | 0 | 1 | 0 | 0 | 0 | 0 |

|           |   |   |   |   |   |   |
|-----------|---|---|---|---|---|---|
| NM_031857 | 0 | 0 | 0 | 0 | 0 | 1 |
| NM_031858 | 1 | 1 | 1 | 1 | 0 | 0 |
| NM_031860 | 1 | 0 | 0 | 0 | 0 | 0 |
| NM_031861 | 1 | 0 | 1 | 1 | 0 | 0 |
| NM_031862 | 1 | 1 | 1 | 1 | 0 | 0 |
| NM_031864 | 1 | 0 | 1 | 0 | 0 | 1 |
| NM_031865 | 1 | 0 | 1 | 0 | 0 | 1 |
| NM_031866 | 1 | 0 | 1 | 0 | 0 | 0 |
| NM_031882 | 1 | 0 | 1 | 0 | 0 | 1 |
| NM_031883 | 1 | 0 | 1 | 0 | 0 | 0 |
| NM_031885 | 1 | 0 | 1 | 1 | 1 | 1 |
| NM_031886 | 1 | 0 | 1 | 0 | 0 | 0 |
| NM_031889 | 1 | 0 | 1 | 1 | 0 | 0 |
| NM_031890 | 1 | 1 | 1 | 1 | 1 | 1 |
| NM_031892 | 1 | 0 | 1 | 0 | 0 | 0 |
| NM_031894 | 1 | 0 | 1 | 0 | 0 | 0 |
| NM_031895 | 1 | 0 | 1 | 0 | 0 | 0 |
| NM_031896 | 1 | 1 | 1 | 1 | 0 | 0 |
| NM_031898 | 1 | 0 | 1 | 0 | 0 | 0 |
| NM_031899 | 1 | 0 | 1 | 0 | 0 | 1 |
| NM_031900 | 0 | 1 | 0 | 1 | 0 | 1 |
| NM_031902 | 1 | 1 | 1 | 1 | 0 | 1 |
| NM_031903 | 1 | 1 | 1 | 1 | 0 | 0 |
| NM_031904 | 1 | 0 | 1 | 1 | 0 | 0 |
| NM_031905 | 1 | 0 | 1 | 0 | 0 | 0 |
| NM_031907 | 1 | 0 | 1 | 0 | 0 | 0 |
| NM_031908 | 1 | 1 | 1 | 0 | 0 | 0 |
| NM_031909 | 0 | 0 | 0 | 0 | 0 | 1 |
| NM_031910 | 1 | 1 | 1 | 1 | 1 | 1 |
| NM_031911 | 1 | 1 | 1 | 1 | 0 | 0 |
| NM_031912 | 1 | 1 | 0 | 0 | 0 | 1 |
| NM_031915 | 1 | 0 | 1 | 1 | 1 | 1 |
| NM_031916 | 1 | 0 | 1 | 1 | 1 | 1 |
| NM_031917 | 1 | 1 | 1 | 1 | 0 | 0 |
| NM_031918 | 1 | 0 | 1 | 0 | 0 | 0 |
| NM_031920 | 1 | 0 | 1 | 0 | 0 | 0 |
| NM_031921 | 1 | 0 | 1 | 0 | 0 | 0 |
| NM_031922 | 1 | 0 | 1 | 1 | 1 | 1 |
| NM_031924 | 1 | 0 | 1 | 0 | 0 | 1 |
| NM_031925 | 1 | 0 | 1 | 1 | 0 | 1 |
| NM_031926 | 1 | 1 | 1 | 1 | 0 | 0 |
| NM_031934 | 1 | 1 | 1 | 1 | 0 | 1 |
| NM_031935 | 1 | 0 | 1 | 0 | 0 | 0 |
| NM_031936 | 1 | 0 | 0 | 0 | 0 | 0 |
| NM_031937 | 1 | 0 | 1 | 0 | 0 | 0 |
| NM_031938 | 1 | 0 | 1 | 0 | 0 | 0 |
| NM_031939 | 1 | 0 | 0 | 0 | 0 | 0 |
| NM_031942 | 1 | 0 | 1 | 0 | 0 | 1 |
| NM_031943 | 1 | 0 | 1 | 1 | 1 | 1 |
| NM_031944 | 1 | 0 | 1 | 0 | 0 | 0 |
| NM_031945 | 1 | 0 | 1 | 0 | 0 | 0 |
| NM_031946 | 1 | 1 | 1 | 1 | 0 | 1 |

|           |   |   |   |   |   |   |
|-----------|---|---|---|---|---|---|
| NM_031950 | 1 | 1 | 1 | 1 | 1 | 0 |
| NM_031952 | 1 | 0 | 1 | 0 | 0 | 1 |
| NM_031953 | 1 | 0 | 1 | 0 | 0 | 0 |
| NM_031954 | 1 | 1 | 1 | 1 | 0 | 0 |
| NM_031956 | 1 | 0 | 1 | 1 | 0 | 0 |
| NM_031957 | 1 | 0 | 1 | 0 | 0 | 0 |
| NM_031958 | 0 | 0 | 0 | 0 | 0 | 1 |
| NM_031961 | 1 | 1 | 1 | 0 | 0 | 1 |
| NM_031964 | 0 | 0 | 0 | 0 | 0 | 1 |
| NM_031965 | 0 | 0 | 1 | 0 | 0 | 0 |
| NM_031966 | 1 | 1 | 1 | 0 | 1 | 1 |
| NM_031988 | 1 | 0 | 1 | 0 | 0 | 0 |
| NM_031990 | 1 | 1 | 1 | 1 | 1 | 1 |
| NM_031991 | 1 | 1 | 1 | 1 | 1 | 1 |
| NM_031992 | 1 | 0 | 1 | 0 | 0 | 1 |
| NM_031993 | 1 | 0 | 1 | 0 | 1 | 1 |
| NM_032009 | 1 | 0 | 1 | 1 | 0 | 1 |
| NM_032010 | 1 | 0 | 1 | 0 | 0 | 1 |
| NM_032011 | 1 | 1 | 1 | 0 | 0 | 1 |
| NM_032012 | 1 | 0 | 1 | 1 | 1 | 1 |
| NM_032013 | 1 | 0 | 1 | 0 | 0 | 1 |
| NM_032014 | 1 | 1 | 1 | 1 | 0 | 0 |
| NM_032015 | 1 | 1 | 1 | 1 | 0 | 0 |
| NM_032016 | 1 | 0 | 1 | 0 | 0 | 0 |
| NM_032017 | 1 | 1 | 1 | 1 | 0 | 1 |
| NM_032018 | 1 | 0 | 1 | 0 | 0 | 0 |
| NM_032019 | 1 | 0 | 0 | 0 | 0 | 0 |
| NM_032020 | 1 | 1 | 1 | 1 | 1 | 1 |
| NM_032021 | 1 | 1 | 1 | 0 | 0 | 0 |
| NM_032023 | 1 | 1 | 1 | 1 | 0 | 1 |
| NM_032024 | 1 | 1 | 1 | 1 | 0 | 0 |
| NM_032025 | 1 | 1 | 1 | 1 | 0 | 0 |
| NM_032026 | 1 | 1 | 1 | 1 | 0 | 0 |
| NM_032027 | 1 | 0 | 1 | 1 | 0 | 0 |
| NM_032029 | 1 | 1 | 1 | 1 | 0 | 0 |
| NM_032030 | 1 | 1 | 0 | 0 | 0 | 1 |
| NM_032031 | 1 | 0 | 1 | 1 | 1 | 1 |
| NM_032032 | 1 | 0 | 1 | 0 | 0 | 0 |
| NM_032034 | 1 | 0 | 1 | 0 | 0 | 0 |
| NM_032035 | 1 | 0 | 1 | 0 | 0 | 0 |
| NM_032036 | 1 | 1 | 1 | 1 | 0 | 0 |
| NM_032037 | 1 | 0 | 1 | 0 | 0 | 0 |
| NM_032039 | 1 | 1 | 1 | 1 | 1 | 1 |
| NM_032040 | 1 | 1 | 1 | 0 | 0 | 0 |
| NM_032041 | 1 | 0 | 1 | 1 | 1 | 0 |
| NM_032042 | 1 | 0 | 1 | 0 | 0 | 0 |
| NM_032043 | 1 | 0 | 1 | 0 | 0 | 0 |
| NM_032044 | 1 | 0 | 1 | 0 | 0 | 0 |
| NM_032045 | 1 | 0 | 1 | 0 | 0 | 0 |
| NM_032046 | 1 | 0 | 1 | 0 | 0 | 0 |
| NM_032047 | 1 | 0 | 1 | 1 | 1 | 1 |
| NM_032048 | 1 | 1 | 1 | 1 | 1 | 1 |

|           |   |   |   |   |   |   |
|-----------|---|---|---|---|---|---|
| NM_032050 | 1 | 1 | 1 | 1 | 0 | 0 |
| NM_032051 | 1 | 1 | 1 | 1 | 0 | 0 |
| NM_032053 | 0 | 0 | 0 | 0 | 0 | 1 |
| NM_032054 | 1 | 0 | 1 | 1 | 0 | 0 |
| NM_032087 | 1 | 1 | 1 | 1 | 0 | 0 |
| NM_032088 | 1 | 1 | 1 | 1 | 0 | 0 |
| NM_032089 | 1 | 0 | 1 | 0 | 0 | 0 |
| NM_032090 | 1 | 0 | 1 | 0 | 0 | 0 |
| NM_032091 | 1 | 1 | 0 | 0 | 0 | 1 |
| NM_032092 | 1 | 1 | 1 | 1 | 0 | 0 |
| NM_032094 | 1 | 1 | 1 | 0 | 0 | 1 |
| NM_032095 | 1 | 0 | 0 | 0 | 0 | 0 |
| NM_032096 | 1 | 0 | 1 | 1 | 0 | 0 |
| NM_032097 | 1 | 0 | 0 | 0 | 0 | 0 |
| NM_032098 | 1 | 0 | 1 | 1 | 0 | 0 |
| NM_032099 | 1 | 0 | 0 | 0 | 0 | 1 |
| NM_032100 | 1 | 0 | 1 | 0 | 0 | 0 |
| NM_032101 | 1 | 0 | 1 | 0 | 0 | 0 |
| NM_032102 | 1 | 0 | 1 | 1 | 0 | 0 |
| NM_032103 | 1 | 0 | 1 | 0 | 0 | 0 |
| NM_032107 | 1 | 0 | 1 | 1 | 1 | 1 |
| NM_032111 | 1 | 1 | 1 | 1 | 1 | 1 |
| NM_032112 | 1 | 0 | 1 | 0 | 0 | 0 |
| NM_032115 | 1 | 0 | 1 | 1 | 0 | 0 |
| NM_032116 | 1 | 1 | 1 | 1 | 0 | 1 |
| NM_032117 | 1 | 0 | 1 | 0 | 0 | 0 |
| NM_032118 | 1 | 1 | 1 | 1 | 1 | 1 |
| NM_032119 | 1 | 0 | 1 | 1 | 0 | 0 |
| NM_032120 | 1 | 0 | 1 | 1 | 0 | 1 |
| NM_032121 | 1 | 0 | 1 | 0 | 0 | 0 |
| NM_032122 | 1 | 0 | 1 | 0 | 0 | 1 |
| NM_032124 | 1 | 1 | 1 | 1 | 1 | 1 |
| NM_032125 | 1 | 0 | 1 | 0 | 0 | 0 |
| NM_032126 | 0 | 0 | 1 | 0 | 0 | 0 |
| NM_032127 | 1 | 0 | 1 | 0 | 0 | 1 |
| NM_032128 | 1 | 0 | 1 | 1 | 0 | 0 |
| NM_032129 | 1 | 0 | 1 | 0 | 0 | 1 |
| NM_032130 | 1 | 0 | 1 | 0 | 0 | 0 |
| NM_032131 | 1 | 0 | 1 | 0 | 0 | 0 |
| NM_032132 | 1 | 1 | 1 | 1 | 0 | 0 |
| NM_032133 | 1 | 0 | 1 | 1 | 0 | 0 |
| NM_032134 | 1 | 0 | 1 | 1 | 0 | 1 |
| NM_032135 | 0 | 0 | 0 | 1 | 0 | 0 |
| NM_032136 | 1 | 1 | 1 | 0 | 0 | 0 |
| NM_032137 | 1 | 0 | 1 | 0 | 0 | 0 |
| NM_032138 | 1 | 1 | 1 | 1 | 0 | 0 |
| NM_032139 | 1 | 0 | 1 | 1 | 0 | 0 |
| NM_032140 | 1 | 1 | 1 | 1 | 0 | 1 |
| NM_032141 | 1 | 0 | 1 | 0 | 0 | 0 |
| NM_032142 | 1 | 0 | 1 | 0 | 0 | 0 |
| NM_032143 | 1 | 0 | 0 | 0 | 0 | 0 |
| NM_032144 | 1 | 0 | 1 | 0 | 0 | 1 |

|           |   |   |   |   |   |   |
|-----------|---|---|---|---|---|---|
| NM_032145 | 1 | 0 | 1 | 1 | 0 | 0 |
| NM_032146 | 1 | 0 | 1 | 0 | 0 | 0 |
| NM_032147 | 1 | 0 | 1 | 0 | 0 | 0 |
| NM_032148 | 1 | 0 | 1 | 0 | 0 | 0 |
| NM_032151 | 1 | 1 | 1 | 0 | 0 | 0 |
| NM_032152 | 1 | 0 | 1 | 0 | 0 | 0 |
| NM_032153 | 1 | 0 | 1 | 0 | 0 | 0 |
| NM_032154 | 1 | 0 | 1 | 0 | 0 | 0 |
| NM_032155 | 1 | 1 | 1 | 1 | 0 | 0 |
| NM_032160 | 1 | 1 | 1 | 1 | 0 | 0 |
| NM_032161 | 1 | 1 | 1 | 1 | 0 | 0 |
| NM_032162 | 1 | 0 | 1 | 0 | 0 | 1 |
| NM_032164 | 1 | 0 | 1 | 0 | 0 | 1 |
| NM_032166 | 1 | 0 | 1 | 1 | 0 | 1 |
| NM_032167 | 1 | 1 | 1 | 1 | 0 | 0 |
| NM_032168 | 1 | 1 | 1 | 1 | 0 | 0 |
| NM_032169 | 1 | 0 | 1 | 1 | 0 | 1 |
| NM_032173 | 1 | 1 | 1 | 1 | 0 | 0 |
| NM_032174 | 1 | 1 | 1 | 1 | 1 | 1 |
| NM_032175 | 1 | 0 | 1 | 0 | 0 | 1 |
| NM_032177 | 1 | 0 | 1 | 0 | 0 | 0 |
| NM_032178 | 1 | 0 | 1 | 0 | 0 | 0 |
| NM_032179 | 1 | 0 | 1 | 0 | 0 | 0 |
| NM_032181 | 1 | 0 | 1 | 0 | 1 | 1 |
| NM_032182 | 1 | 1 | 1 | 1 | 1 | 0 |
| NM_032186 | 1 | 0 | 1 | 0 | 0 | 0 |
| NM_032188 | 1 | 1 | 1 | 1 | 0 | 0 |
| NM_032192 | 1 | 0 | 1 | 0 | 0 | 0 |
| NM_032193 | 1 | 0 | 1 | 0 | 1 | 1 |
| NM_032195 | 1 | 1 | 1 | 1 | 0 | 1 |
| NM_032196 | 1 | 1 | 1 | 1 | 0 | 0 |
| NM_032202 | 1 | 1 | 1 | 0 | 0 | 0 |
| NM_032204 | 1 | 1 | 1 | 1 | 0 | 0 |
| NM_032205 | 1 | 1 | 1 | 1 | 0 | 0 |
| NM_032206 | 1 | 0 | 1 | 0 | 0 | 1 |
| NM_032207 | 1 | 0 | 1 | 0 | 0 | 0 |
| NM_032211 | 1 | 1 | 1 | 1 | 0 | 1 |
| NM_032213 | 1 | 0 | 1 | 0 | 0 | 0 |
| NM_032217 | 1 | 0 | 1 | 0 | 0 | 0 |
| NM_032219 | 1 | 0 | 1 | 0 | 0 | 0 |
| NM_032220 | 1 | 1 | 1 | 1 | 0 | 0 |
| NM_032221 | 1 | 0 | 1 | 1 | 1 | 1 |
| NM_032223 | 1 | 1 | 1 | 1 | 0 | 0 |
| NM_032226 | 1 | 1 | 1 | 1 | 0 | 1 |
| NM_032227 | 1 | 1 | 1 | 1 | 0 | 0 |
| NM_032228 | 1 | 0 | 1 | 1 | 1 | 1 |
| NM_032229 | 0 | 0 | 1 | 0 | 0 | 0 |
| NM_032231 | 1 | 1 | 1 | 1 | 1 | 1 |
| NM_032233 | 1 | 1 | 1 | 1 | 0 | 0 |
| NM_032234 | 1 | 0 | 1 | 0 | 0 | 0 |
| NM_032235 | 1 | 1 | 1 | 1 | 0 | 0 |
| NM_032236 | 1 | 0 | 1 | 0 | 0 | 0 |

|           |   |   |   |   |   |   |
|-----------|---|---|---|---|---|---|
| NM_032238 | 1 | 0 | 1 | 0 | 0 | 0 |
| NM_032239 | 1 | 0 | 1 | 0 | 0 | 1 |
| NM_032242 | 1 | 0 | 1 | 0 | 0 | 0 |
| NM_032243 | 1 | 0 | 1 | 0 | 0 | 0 |
| NM_032245 | 1 | 1 | 1 | 1 | 0 | 1 |
| NM_032246 | 1 | 0 | 1 | 0 | 0 | 0 |
| NM_032247 | 1 | 0 | 1 | 0 | 0 | 0 |
| NM_032248 | 1 | 0 | 1 | 0 | 0 | 0 |
| NM_032250 | 0 | 0 | 0 | 0 | 0 | 1 |
| NM_032251 | 1 | 0 | 1 | 0 | 0 | 0 |
| NM_032253 | 1 | 0 | 1 | 0 | 0 | 0 |
| NM_032254 | 1 | 0 | 1 | 0 | 1 | 1 |
| NM_032255 | 1 | 1 | 1 | 0 | 0 | 1 |
| NM_032256 | 1 | 1 | 1 | 1 | 0 | 0 |
| NM_032257 | 1 | 0 | 1 | 0 | 0 | 0 |
| NM_032258 | 1 | 0 | 1 | 1 | 0 | 0 |
| NM_032259 | 1 | 0 | 1 | 0 | 0 | 0 |
| NM_032260 | 1 | 0 | 1 | 0 | 0 | 0 |
| NM_032261 | 1 | 0 | 1 | 0 | 0 | 1 |
| NM_032262 | 1 | 0 | 1 | 1 | 1 | 0 |
| NM_032263 | 1 | 1 | 1 | 0 | 0 | 0 |
| NM_032264 | 1 | 0 | 1 | 0 | 0 | 0 |
| NM_032265 | 1 | 1 | 1 | 1 | 0 | 0 |
| NM_032266 | 0 | 0 | 1 | 0 | 0 | 0 |
| NM_032268 | 0 | 0 | 1 | 0 | 0 | 0 |
| NM_032269 | 1 | 1 | 1 | 1 | 0 | 0 |
| NM_032270 | 1 | 1 | 1 | 1 | 1 | 1 |
| NM_032271 | 1 | 1 | 1 | 1 | 0 | 0 |
| NM_032272 | 1 | 1 | 1 | 1 | 0 | 0 |
| NM_032273 | 1 | 1 | 1 | 1 | 0 | 1 |
| NM_032276 | 1 | 0 | 1 | 0 | 0 | 0 |
| NM_032280 | 1 | 0 | 1 | 0 | 0 | 1 |
| NM_032284 | 1 | 1 | 1 | 1 | 1 | 1 |
| NM_032285 | 1 | 1 | 1 | 1 | 0 | 0 |
| NM_032286 | 1 | 0 | 1 | 1 | 1 | 1 |
| NM_032287 | 1 | 0 | 1 | 1 | 1 | 1 |
| NM_032288 | 1 | 0 | 1 | 1 | 1 | 1 |
| NM_032289 | 1 | 0 | 1 | 0 | 0 | 0 |
| NM_032290 | 1 | 1 | 1 | 1 | 0 | 0 |
| NM_032291 | 1 | 0 | 0 | 0 | 1 | 0 |
| NM_032292 | 1 | 0 | 1 | 1 | 0 | 1 |
| NM_032293 | 1 | 0 | 1 | 0 | 1 | 0 |
| NM_032294 | 1 | 1 | 1 | 1 | 0 | 1 |
| NM_032295 | 1 | 1 | 1 | 1 | 0 | 1 |
| NM_032296 | 1 | 1 | 1 | 1 | 0 | 1 |
| NM_032297 | 1 | 0 | 0 | 0 | 0 | 1 |
| NM_032298 | 1 | 1 | 1 | 1 | 0 | 1 |
| NM_032299 | 1 | 0 | 1 | 0 | 0 | 1 |
| NM_032300 | 1 | 0 | 1 | 1 | 0 | 0 |
| NM_032301 | 1 | 1 | 1 | 1 | 1 | 1 |
| NM_032302 | 1 | 0 | 1 | 1 | 0 | 0 |
| NM_032303 | 1 | 0 | 1 | 0 | 0 | 1 |

|           |   |   |   |   |   |   |
|-----------|---|---|---|---|---|---|
| NM_032304 | 1 | 1 | 1 | 1 | 0 | 1 |
| NM_032305 | 1 | 1 | 1 | 1 | 0 | 0 |
| NM_032306 | 1 | 0 | 1 | 0 | 0 | 1 |
| NM_032307 | 1 | 0 | 1 | 0 | 0 | 0 |
| NM_032308 | 1 | 0 | 1 | 1 | 1 | 1 |
| NM_032309 | 1 | 0 | 1 | 0 | 0 | 0 |
| NM_032310 | 1 | 0 | 1 | 0 | 0 | 1 |
| NM_032311 | 1 | 1 | 1 | 1 | 0 | 0 |
| NM_032312 | 1 | 1 | 1 | 1 | 0 | 1 |
| NM_032313 | 1 | 1 | 1 | 1 | 1 | 1 |
| NM_032314 | 1 | 0 | 1 | 1 | 1 | 1 |
| NM_032315 | 1 | 1 | 1 | 1 | 1 | 1 |
| NM_032316 | 1 | 1 | 1 | 1 | 0 | 1 |
| NM_032317 | 1 | 0 | 1 | 1 | 0 | 0 |
| NM_032318 | 1 | 0 | 1 | 0 | 0 | 1 |
| NM_032319 | 1 | 0 | 1 | 1 | 0 | 1 |
| NM_032320 | 1 | 1 | 1 | 1 | 0 | 1 |
| NM_032321 | 1 | 0 | 1 | 0 | 1 | 1 |
| NM_032322 | 1 | 0 | 1 | 0 | 0 | 0 |
| NM_032323 | 1 | 1 | 1 | 1 | 0 | 0 |
| NM_032324 | 1 | 0 | 1 | 0 | 1 | 0 |
| NM_032325 | 1 | 0 | 1 | 0 | 0 | 1 |
| NM_032326 | 1 | 0 | 1 | 0 | 0 | 0 |
| NM_032327 | 1 | 1 | 1 | 1 | 0 | 0 |
| NM_032328 | 1 | 1 | 1 | 1 | 1 | 1 |
| NM_032329 | 1 | 0 | 1 | 1 | 0 | 0 |
| NM_032330 | 1 | 0 | 1 | 0 | 1 | 1 |
| NM_032331 | 1 | 0 | 1 | 1 | 0 | 0 |
| NM_032332 | 1 | 1 | 1 | 1 | 0 | 0 |
| NM_032333 | 1 | 1 | 1 | 1 | 0 | 1 |
| NM_032334 | 1 | 0 | 1 | 0 | 1 | 1 |
| NM_032335 | 1 | 0 | 1 | 0 | 0 | 0 |
| NM_032338 | 1 | 0 | 1 | 1 | 0 | 0 |
| NM_032339 | 1 | 0 | 1 | 1 | 0 | 0 |
| NM_032340 | 1 | 1 | 1 | 0 | 0 | 0 |
| NM_032341 | 1 | 0 | 1 | 0 | 0 | 1 |
| NM_032342 | 1 | 0 | 1 | 1 | 0 | 0 |
| NM_032343 | 1 | 1 | 1 | 1 | 1 | 1 |
| NM_032344 | 1 | 0 | 1 | 0 | 0 | 0 |
| NM_032345 | 1 | 0 | 1 | 0 | 0 | 0 |
| NM_032346 | 1 | 1 | 1 | 1 | 1 | 1 |
| NM_032347 | 1 | 1 | 1 | 1 | 1 | 1 |
| NM_032348 | 1 | 1 | 1 | 1 | 0 | 1 |
| NM_032349 | 1 | 1 | 1 | 1 | 0 | 1 |
| NM_032350 | 1 | 1 | 1 | 1 | 1 | 1 |
| NM_032351 | 1 | 1 | 1 | 1 | 1 | 1 |
| NM_032352 | 1 | 0 | 1 | 1 | 0 | 1 |
| NM_032353 | 1 | 0 | 1 | 0 | 0 | 0 |
| NM_032354 | 1 | 1 | 1 | 1 | 1 | 1 |
| NM_032355 | 1 | 1 | 1 | 1 | 1 | 1 |
| NM_032356 | 1 | 0 | 1 | 0 | 1 | 0 |
| NM_032357 | 1 | 0 | 1 | 1 | 1 | 1 |

|           |   |   |   |   |   |   |
|-----------|---|---|---|---|---|---|
| NM_032358 | 1 | 0 | 1 | 0 | 0 | 0 |
| NM_032359 | 1 | 0 | 1 | 1 | 1 | 1 |
| NM_032360 | 1 | 1 | 1 | 1 | 0 | 1 |
| NM_032361 | 1 | 1 | 1 | 1 | 0 | 0 |
| NM_032362 | 0 | 0 | 0 | 1 | 0 | 0 |
| NM_032364 | 1 | 0 | 1 | 1 | 0 | 0 |
| NM_032366 | 1 | 1 | 1 | 1 | 0 | 0 |
| NM_032367 | 1 | 1 | 1 | 1 | 0 | 0 |
| NM_032368 | 1 | 0 | 1 | 0 | 1 | 1 |
| NM_032369 | 1 | 1 | 1 | 1 | 0 | 1 |
| NM_032370 | 1 | 0 | 1 | 0 | 1 | 0 |
| NM_032371 | 1 | 1 | 1 | 1 | 0 | 0 |
| NM_032373 | 1 | 0 | 1 | 0 | 0 | 1 |
| NM_032374 | 1 | 0 | 1 | 0 | 0 | 0 |
| NM_032375 | 1 | 0 | 1 | 0 | 0 | 0 |
| NM_032376 | 1 | 0 | 1 | 1 | 0 | 0 |
| NM_032377 | 1 | 0 | 1 | 0 | 0 | 0 |
| NM_032380 | 1 | 0 | 1 | 0 | 1 | 0 |
| NM_032382 | 1 | 1 | 1 | 1 | 0 | 1 |
| NM_032383 | 1 | 0 | 1 | 0 | 0 | 0 |
| NM_032387 | 1 | 0 | 1 | 0 | 0 | 0 |
| NM_032389 | 1 | 0 | 1 | 0 | 1 | 1 |
| NM_032390 | 1 | 0 | 1 | 1 | 1 | 1 |
| NM_032391 | 0 | 0 | 1 | 0 | 0 | 0 |
| NM_032401 | 1 | 0 | 1 | 0 | 1 | 0 |
| NM_032402 | 1 | 1 | 0 | 0 | 0 | 1 |
| NM_032405 | 1 | 0 | 1 | 0 | 0 | 0 |
| NM_032407 | 1 | 0 | 0 | 0 | 0 | 1 |
| NM_032409 | 1 | 1 | 1 | 1 | 0 | 0 |
| NM_032410 | 1 | 0 | 1 | 0 | 0 | 1 |
| NM_032411 | 1 | 1 | 1 | 1 | 0 | 0 |
| NM_032412 | 1 | 1 | 1 | 1 | 0 | 1 |
| NM_032413 | 1 | 0 | 1 | 0 | 0 | 1 |
| NM_032414 | 0 | 0 | 0 | 0 | 0 | 1 |
| NM_032415 | 1 | 1 | 1 | 1 | 0 | 1 |
| NM_032420 | 1 | 1 | 1 | 1 | 0 | 1 |
| NM_032421 | 1 | 0 | 1 | 0 | 0 | 0 |
| NM_032423 | 1 | 0 | 1 | 1 | 1 | 1 |
| NM_032427 | 1 | 0 | 1 | 1 | 0 | 0 |
| NM_032430 | 1 | 1 | 1 | 1 | 0 | 0 |
| NM_032431 | 1 | 1 | 1 | 0 | 0 | 1 |
| NM_032432 | 1 | 1 | 1 | 0 | 1 | 1 |
| NM_032433 | 1 | 0 | 1 | 0 | 0 | 0 |
| NM_032434 | 1 | 0 | 1 | 1 | 0 | 0 |
| NM_032435 | 1 | 0 | 1 | 0 | 0 | 0 |
| NM_032439 | 0 | 0 | 0 | 0 | 0 | 1 |
| NM_032442 | 1 | 0 | 1 | 0 | 0 | 0 |
| NM_032444 | 1 | 1 | 1 | 1 | 0 | 1 |
| NM_032445 | 0 | 0 | 1 | 0 | 0 | 0 |
| NM_032446 | 1 | 1 | 1 | 1 | 0 | 0 |
| NM_032448 | 1 | 1 | 1 | 1 | 0 | 0 |
| NM_032456 | 1 | 0 | 0 | 0 | 0 | 1 |



|           |   |   |   |   |   |   |
|-----------|---|---|---|---|---|---|
| NM_032457 | 1 | 0 | 0 | 0 | 0 | 0 |
| NM_032458 | 1 | 0 | 1 | 1 | 0 | 0 |
| NM_032466 | 1 | 0 | 1 | 1 | 1 | 1 |
| NM_032467 | 1 | 0 | 1 | 0 | 0 | 0 |
| NM_032468 | 1 | 1 | 1 | 1 | 0 | 0 |
| NM_032470 | 1 | 0 | 1 | 0 | 0 | 0 |
| NM_032471 | 1 | 0 | 1 | 0 | 1 | 0 |
| NM_032472 | 1 | 0 | 1 | 1 | 0 | 0 |
| NM_032476 | 1 | 1 | 1 | 1 | 0 | 0 |
| NM_032477 | 1 | 1 | 1 | 1 | 0 | 1 |
| NM_032478 | 1 | 1 | 1 | 1 | 0 | 0 |
| NM_032479 | 1 | 1 | 1 | 1 | 0 | 1 |
| NM_032482 | 1 | 1 | 1 | 0 | 0 | 1 |
| NM_032483 | 1 | 1 | 1 | 1 | 1 | 1 |
| NM_032484 | 1 | 0 | 1 | 1 | 0 | 0 |
| NM_032485 | 1 | 1 | 1 | 1 | 0 | 1 |
| NM_032486 | 1 | 1 | 1 | 1 | 0 | 1 |
| NM_032487 | 1 | 0 | 1 | 0 | 0 | 0 |
| NM_032488 | 1 | 1 | 1 | 1 | 0 | 0 |
| NM_032489 | 1 | 1 | 1 | 1 | 0 | 1 |
| NM_032490 | 1 | 0 | 1 | 0 | 0 | 1 |
| NM_032492 | 1 | 1 | 1 | 1 | 0 | 0 |
| NM_032493 | 1 | 1 | 1 | 1 | 0 | 0 |
| NM_032494 | 1 | 0 | 1 | 0 | 1 | 1 |
| NM_032495 | 1 | 1 | 1 | 1 | 1 | 0 |
| NM_032496 | 1 | 1 | 1 | 1 | 1 | 1 |
| NM_032497 | 1 | 0 | 1 | 1 | 0 | 0 |
| NM_032498 | 1 | 0 | 1 | 0 | 0 | 0 |
| NM_032499 | 1 | 0 | 1 | 1 | 0 | 1 |
| NM_032501 | 1 | 1 | 1 | 1 | 0 | 1 |
| NM_032503 | 1 | 0 | 1 | 0 | 0 | 0 |
| NM_032505 | 1 | 0 | 1 | 0 | 0 | 0 |
| NM_032507 | 1 | 0 | 1 | 1 | 0 | 0 |
| NM_032508 | 1 | 0 | 1 | 0 | 0 | 0 |
| NM_032509 | 1 | 0 | 1 | 1 | 0 | 0 |
| NM_032510 | 1 | 1 | 1 | 1 | 1 | 1 |
| NM_032511 | 1 | 1 | 1 | 0 | 0 | 1 |
| NM_032512 | 1 | 0 | 1 | 1 | 1 | 1 |
| NM_032513 | 1 | 0 | 0 | 0 | 0 | 0 |
| NM_032514 | 1 | 1 | 1 | 1 | 0 | 1 |
| NM_032515 | 1 | 0 | 1 | 1 | 1 | 1 |
| NM_032519 | 1 | 0 | 1 | 0 | 0 | 0 |
| NM_032520 | 1 | 1 | 1 | 1 | 0 | 1 |
| NM_032522 | 1 | 1 | 1 | 1 | 0 | 1 |
| NM_032523 | 1 | 1 | 1 | 1 | 0 | 1 |
| NM_032524 | 0 | 1 | 0 | 1 | 0 | 0 |
| NM_032525 | 1 | 1 | 1 | 1 | 0 | 1 |
| NM_032526 | 1 | 0 | 1 | 0 | 0 | 0 |
| NM_032527 | 1 | 1 | 1 | 1 | 0 | 0 |
| NM_032528 | 0 | 0 | 0 | 0 | 0 | 1 |
| NM_032531 | 1 | 0 | 1 | 0 | 0 | 0 |
| NM_032536 | 1 | 0 | 1 | 1 | 1 | 1 |

|           |   |   |   |   |   |   |
|-----------|---|---|---|---|---|---|
| NM_032539 | 0 | 0 | 0 | 1 | 0 | 1 |
| NM_032545 | 1 | 0 | 1 | 0 | 0 | 0 |
| NM_032546 | 1 | 0 | 1 | 0 | 0 | 0 |
| NM_032547 | 1 | 0 | 1 | 0 | 0 | 0 |
| NM_032548 | 1 | 1 | 1 | 1 | 0 | 1 |
| NM_032549 | 1 | 1 | 1 | 1 | 1 | 0 |
| NM_032550 | 1 | 1 | 1 | 0 | 0 | 0 |
| NM_032551 | 1 | 0 | 0 | 0 | 0 | 0 |
| NM_032552 | 1 | 1 | 1 | 1 | 0 | 0 |
| NM_032553 | 1 | 0 | 1 | 1 | 0 | 1 |
| NM_032554 | 1 | 0 | 1 | 0 | 0 | 0 |
| NM_032556 | 1 | 0 | 1 | 0 | 1 | 0 |
| NM_032557 | 1 | 1 | 1 | 1 | 0 | 1 |
| NM_032558 | 1 | 1 | 1 | 1 | 0 | 1 |
| NM_032561 | 1 | 1 | 0 | 0 | 0 | 0 |
| NM_032563 | 1 | 0 | 1 | 1 | 0 | 0 |
| NM_032564 | 1 | 1 | 1 | 1 | 0 | 1 |
| NM_032565 | 1 | 0 | 1 | 1 | 0 | 0 |
| NM_032566 | 0 | 1 | 0 | 1 | 0 | 0 |
| NM_032569 | 1 | 0 | 1 | 1 | 0 | 0 |
| NM_032570 | 1 | 1 | 1 | 1 | 1 | 1 |
| NM_032572 | 0 | 0 | 1 | 0 | 0 | 0 |
| NM_032573 | 1 | 0 | 1 | 0 | 1 | 1 |
| NM_032574 | 1 | 1 | 1 | 1 | 1 | 1 |
| NM_032575 | 1 | 0 | 1 | 0 | 0 | 0 |
| NM_032576 | 1 | 0 | 1 | 1 | 0 | 0 |
| NM_032577 | 1 | 0 | 1 | 0 | 0 | 0 |
| NM_032578 | 1 | 0 | 1 | 0 | 0 | 0 |
| NM_032579 | 1 | 0 | 1 | 1 | 0 | 0 |
| NM_032580 | 1 | 0 | 1 | 1 | 0 | 0 |
| NM_032581 | 1 | 0 | 1 | 1 | 0 | 0 |
| NM_032582 | 1 | 0 | 1 | 1 | 1 | 1 |
| NM_032583 | 1 | 0 | 0 | 0 | 0 | 0 |
| NM_032584 | 1 | 0 | 1 | 1 | 0 | 1 |
| NM_032587 | 1 | 0 | 1 | 1 | 1 | 1 |
| NM_032588 | 1 | 0 | 1 | 0 | 0 | 0 |
| NM_032589 | 1 | 0 | 1 | 0 | 0 | 0 |
| NM_032590 | 1 | 0 | 1 | 1 | 0 | 0 |
| NM_032591 | 1 | 0 | 0 | 0 | 0 | 0 |
| NM_032592 | 1 | 1 | 1 | 1 | 0 | 0 |
| NM_032593 | 1 | 0 | 1 | 1 | 1 | 1 |
| NM_032595 | 1 | 1 | 1 | 0 | 0 | 0 |
| NM_032597 | 1 | 1 | 1 | 1 | 0 | 0 |
| NM_032598 | 1 | 0 | 1 | 0 | 0 | 1 |
| NM_032600 | 0 | 0 | 0 | 0 | 0 | 1 |
| NM_032601 | 1 | 0 | 1 | 1 | 1 | 1 |
| NM_032602 | 0 | 0 | 1 | 0 | 0 | 0 |
| NM_032603 | 1 | 1 | 1 | 1 | 0 | 0 |
| NM_032604 | 1 | 1 | 1 | 0 | 1 | 1 |
| NM_032606 | 1 | 0 | 1 | 0 | 0 | 1 |
| NM_032607 | 1 | 0 | 1 | 1 | 0 | 0 |
| NM_032608 | 0 | 1 | 0 | 0 | 0 | 1 |

|           |   |   |   |   |   |   |
|-----------|---|---|---|---|---|---|
| NM_032609 | 1 | 0 | 1 | 0 | 0 | 0 |
| NM_032620 | 1 | 1 | 1 | 1 | 1 | 1 |
| NM_032621 | 1 | 1 | 1 | 1 | 1 | 0 |
| NM_032622 | 1 | 1 | 1 | 1 | 0 | 0 |
| NM_032623 | 1 | 1 | 1 | 1 | 0 | 1 |
| NM_032624 | 1 | 1 | 1 | 1 | 0 | 1 |
| NM_032625 | 1 | 0 | 1 | 0 | 0 | 1 |
| NM_032626 | 1 | 1 | 1 | 1 | 0 | 0 |
| NM_032627 | 1 | 0 | 1 | 0 | 0 | 0 |
| NM_032630 | 1 | 0 | 1 | 0 | 0 | 0 |
| NM_032631 | 1 | 0 | 1 | 0 | 0 | 0 |
| NM_032632 | 1 | 1 | 1 | 1 | 0 | 0 |
| NM_032633 | 1 | 1 | 1 | 1 | 0 | 0 |
| NM_032635 | 1 | 1 | 1 | 1 | 0 | 0 |
| NM_032636 | 1 | 0 | 1 | 1 | 1 | 1 |
| NM_032637 | 1 | 1 | 1 | 1 | 0 | 0 |
| NM_032638 | 1 | 1 | 1 | 1 | 1 | 1 |
| NM_032639 | 1 | 0 | 1 | 0 | 0 | 0 |
| NM_032640 | 1 | 1 | 1 | 1 | 0 | 1 |
| NM_032641 | 1 | 0 | 1 | 0 | 1 | 1 |
| NM_032642 | 1 | 0 | 1 | 1 | 0 | 1 |
| NM_032644 | 1 | 1 | 1 | 0 | 0 | 1 |
| NM_032646 | 1 | 1 | 1 | 1 | 1 | 1 |
| NM_032647 | 1 | 0 | 1 | 1 | 0 | 0 |
| NM_032648 | 1 | 0 | 1 | 0 | 0 | 1 |
| NM_032653 | 1 | 1 | 1 | 1 | 0 | 0 |
| NM_032654 | 1 | 0 | 1 | 1 | 0 | 0 |
| NM_032656 | 1 | 1 | 1 | 1 | 0 | 0 |
| NM_032658 | 1 | 0 | 1 | 0 | 0 | 0 |
| NM_032661 | 1 | 0 | 1 | 0 | 0 | 1 |
| NM_032662 | 1 | 0 | 1 | 1 | 0 | 0 |
| NM_032663 | 1 | 0 | 1 | 0 | 0 | 1 |
| NM_032664 | 1 | 1 | 1 | 1 | 0 | 1 |
| NM_032667 | 1 | 0 | 1 | 0 | 0 | 0 |
| NM_032668 | 1 | 0 | 1 | 0 | 0 | 0 |
| NM_032671 | 1 | 0 | 0 | 0 | 0 | 0 |
| NM_032673 | 1 | 0 | 1 | 0 | 0 | 0 |
| NM_032676 | 1 | 0 | 1 | 0 | 0 | 1 |
| NM_032679 | 1 | 0 | 0 | 0 | 1 | 1 |
| NM_032681 | 1 | 1 | 1 | 1 | 0 | 0 |
| NM_032682 | 1 | 0 | 1 | 1 | 1 | 0 |
| NM_032683 | 1 | 0 | 1 | 0 | 0 | 0 |
| NM_032685 | 1 | 0 | 1 | 1 | 0 | 0 |
| NM_032687 | 1 | 1 | 1 | 1 | 0 | 1 |
| NM_032689 | 1 | 1 | 1 | 1 | 1 | 1 |
| NM_032690 | 1 | 0 | 1 | 0 | 0 | 0 |
| NM_032691 | 1 | 0 | 0 | 0 | 0 | 0 |
| NM_032694 | 1 | 0 | 1 | 0 | 0 | 1 |
| NM_032696 | 1 | 1 | 1 | 1 | 0 | 0 |
| NM_032701 | 1 | 0 | 1 | 0 | 1 | 0 |
| NM_032704 | 1 | 0 | 1 | 1 | 1 | 1 |
| NM_032705 | 1 | 0 | 1 | 1 | 0 | 0 |

|           |   |   |   |   |   |   |
|-----------|---|---|---|---|---|---|
| NM_032706 | 1 | 0 | 1 | 0 | 0 | 0 |
| NM_032709 | 1 | 1 | 1 | 1 | 0 | 1 |
| NM_032711 | 1 | 1 | 1 | 1 | 0 | 0 |
| NM_032712 | 1 | 0 | 1 | 1 | 0 | 0 |
| NM_032714 | 1 | 1 | 1 | 0 | 0 | 0 |
| NM_032715 | 1 | 0 | 1 | 1 | 1 | 1 |
| NM_032717 | 1 | 1 | 1 | 1 | 1 | 1 |
| NM_032718 | 1 | 0 | 1 | 0 | 1 | 1 |
| NM_032721 | 1 | 0 | 1 | 0 | 0 | 0 |
| NM_032722 | 1 | 0 | 1 | 0 | 0 | 0 |
| NM_032723 | 1 | 0 | 1 | 1 | 1 | 0 |
| NM_032725 | 1 | 0 | 1 | 0 | 0 | 1 |
| NM_032726 | 0 | 0 | 1 | 0 | 0 | 0 |
| NM_032728 | 1 | 1 | 1 | 1 | 0 | 0 |
| NM_032730 | 1 | 1 | 1 | 1 | 1 | 1 |
| NM_032731 | 1 | 0 | 1 | 1 | 1 | 1 |
| NM_032732 | 1 | 0 | 1 | 1 | 0 | 1 |
| NM_032733 | 0 | 0 | 0 | 0 | 0 | 1 |
| NM_032735 | 0 | 1 | 0 | 0 | 0 | 0 |
| NM_032737 | 1 | 1 | 1 | 1 | 1 | 1 |
| NM_032738 | 1 | 1 | 1 | 1 | 0 | 1 |
| NM_032739 | 1 | 1 | 1 | 1 | 0 | 0 |
| NM_032740 | 1 | 0 | 1 | 0 | 0 | 0 |
| NM_032741 | 1 | 0 | 1 | 0 | 0 | 1 |
| NM_032744 | 1 | 1 | 1 | 1 | 1 | 1 |
| NM_032746 | 1 | 0 | 1 | 0 | 0 | 0 |
| NM_032747 | 1 | 1 | 1 | 1 | 0 | 1 |
| NM_032750 | 1 | 1 | 1 | 1 | 0 | 0 |
| NM_032751 | 1 | 0 | 1 | 1 | 1 | 1 |
| NM_032752 | 1 | 0 | 1 | 0 | 0 | 0 |
| NM_032753 | 1 | 0 | 1 | 1 | 0 | 0 |
| NM_032755 | 1 | 1 | 1 | 1 | 0 | 0 |
| NM_032756 | 1 | 0 | 1 | 0 | 1 | 1 |
| NM_032757 | 1 | 1 | 1 | 1 | 0 | 0 |
| NM_032758 | 1 | 0 | 1 | 0 | 0 | 0 |
| NM_032760 | 1 | 0 | 0 | 0 | 0 | 1 |
| NM_032761 | 1 | 0 | 1 | 0 | 0 | 1 |
| NM_032762 | 1 | 1 | 1 | 0 | 0 | 1 |
| NM_032764 | 1 | 0 | 0 | 0 | 0 | 1 |
| NM_032765 | 1 | 0 | 1 | 1 | 0 | 1 |
| NM_032766 | 1 | 0 | 1 | 0 | 0 | 0 |
| NM_032769 | 1 | 0 | 1 | 1 | 0 | 1 |
| NM_032770 | 1 | 0 | 0 | 0 | 0 | 0 |
| NM_032771 | 1 | 1 | 1 | 1 | 0 | 1 |
| NM_032772 | 1 | 1 | 1 | 1 | 0 | 1 |
| NM_032773 | 1 | 0 | 1 | 0 | 0 | 0 |
| NM_032775 | 1 | 0 | 1 | 0 | 0 | 1 |
| NM_032777 | 1 | 1 | 1 | 1 | 1 | 1 |
| NM_032779 | 1 | 1 | 1 | 0 | 0 | 0 |
| NM_032780 | 1 | 1 | 1 | 1 | 1 | 1 |
| NM_032782 | 1 | 1 | 1 | 0 | 0 | 0 |
| NM_032783 | 1 | 1 | 1 | 1 | 0 | 0 |

|           |   |   |   |   |   |   |
|-----------|---|---|---|---|---|---|
| NM_032785 | 1 | 1 | 1 | 1 | 0 | 0 |
| NM_032786 | 1 | 0 | 1 | 1 | 0 | 0 |
| NM_032787 | 0 | 0 | 0 | 0 | 0 | 1 |
| NM_032788 | 1 | 0 | 1 | 0 | 0 | 0 |
| NM_032789 | 1 | 0 | 1 | 0 | 1 | 1 |
| NM_032790 | 1 | 1 | 1 | 1 | 0 | 0 |
| NM_032792 | 1 | 0 | 1 | 0 | 0 | 0 |
| NM_032793 | 1 | 1 | 1 | 1 | 0 | 0 |
| NM_032795 | 1 | 1 | 1 | 1 | 1 | 1 |
| NM_032796 | 1 | 1 | 1 | 1 | 0 | 1 |
| NM_032797 | 1 | 0 | 1 | 0 | 0 | 0 |
| NM_032799 | 1 | 0 | 1 | 0 | 1 | 0 |
| NM_032800 | 1 | 0 | 1 | 1 | 0 | 0 |
| NM_032801 | 1 | 0 | 1 | 0 | 1 | 1 |
| NM_032802 | 1 | 1 | 1 | 1 | 1 | 1 |
| NM_032803 | 1 | 1 | 1 | 1 | 0 | 1 |
| NM_032804 | 1 | 0 | 1 | 0 | 0 | 1 |
| NM_032805 | 1 | 0 | 0 | 0 | 1 | 1 |
| NM_032806 | 1 | 0 | 1 | 1 | 0 | 0 |
| NM_032807 | 1 | 0 | 1 | 0 | 0 | 0 |
| NM_032809 | 1 | 0 | 1 | 0 | 1 | 1 |
| NM_032810 | 1 | 0 | 1 | 1 | 1 | 1 |
| NM_032811 | 1 | 0 | 1 | 0 | 0 | 1 |
| NM_032812 | 1 | 1 | 1 | 1 | 0 | 1 |
| NM_032813 | 1 | 0 | 1 | 1 | 1 | 1 |
| NM_032814 | 1 | 0 | 1 | 0 | 0 | 1 |
| NM_032815 | 1 | 0 | 0 | 0 | 0 | 1 |
| NM_032816 | 1 | 0 | 1 | 0 | 0 | 0 |
| NM_032817 | 0 | 0 | 0 | 0 | 0 | 1 |
| NM_032818 | 1 | 1 | 1 | 0 | 0 | 0 |
| NM_032819 | 1 | 0 | 1 | 1 | 0 | 0 |
| NM_032822 | 1 | 1 | 1 | 1 | 0 | 1 |
| NM_032823 | 0 | 0 | 1 | 0 | 0 | 0 |
| NM_032824 | 1 | 1 | 1 | 1 | 1 | 0 |
| NM_032825 | 1 | 0 | 0 | 0 | 0 | 0 |
| NM_032826 | 1 | 1 | 1 | 1 | 0 | 0 |
| NM_032827 | 1 | 1 | 1 | 1 | 0 | 1 |
| NM_032828 | 1 | 0 | 1 | 1 | 0 | 0 |
| NM_032829 | 1 | 0 | 1 | 1 | 0 | 1 |
| NM_032830 | 1 | 1 | 1 | 1 | 1 | 1 |
| NM_032831 | 1 | 1 | 1 | 1 | 0 | 1 |
| NM_032832 | 1 | 1 | 1 | 1 | 0 | 0 |
| NM_032833 | 1 | 0 | 1 | 1 | 0 | 0 |
| NM_032834 | 1 | 0 | 1 | 0 | 0 | 1 |
| NM_032836 | 1 | 1 | 1 | 1 | 0 | 0 |
| NM_032837 | 1 | 0 | 1 | 0 | 0 | 1 |
| NM_032838 | 1 | 0 | 1 | 1 | 1 | 1 |
| NM_032839 | 1 | 1 | 1 | 1 | 0 | 1 |
| NM_032840 | 1 | 0 | 1 | 1 | 0 | 1 |
| NM_032842 | 1 | 0 | 1 | 1 | 0 | 0 |
| NM_032843 | 1 | 0 | 1 | 0 | 0 | 0 |
| NM_032844 | 1 | 0 | 1 | 0 | 0 | 0 |

|           |   |   |   |   |   |   |
|-----------|---|---|---|---|---|---|
| NM_032845 | 1 | 0 | 1 | 0 | 0 | 0 |
| NM_032846 | 1 | 0 | 1 | 1 | 1 | 1 |
| NM_032847 | 1 | 0 | 1 | 0 | 0 | 0 |
| NM_032848 | 1 | 0 | 1 | 1 | 0 | 0 |
| NM_032849 | 1 | 0 | 1 | 0 | 0 | 0 |
| NM_032850 | 1 | 0 | 1 | 0 | 0 | 0 |
| NM_032852 | 1 | 0 | 1 | 0 | 0 | 0 |
| NM_032853 | 1 | 1 | 1 | 1 | 0 | 0 |
| NM_032854 | 1 | 0 | 1 | 1 | 1 | 0 |
| NM_032855 | 1 | 1 | 1 | 1 | 0 | 0 |
| NM_032856 | 1 | 0 | 1 | 0 | 1 | 1 |
| NM_032857 | 1 | 1 | 1 | 1 | 0 | 0 |
| NM_032858 | 1 | 0 | 1 | 0 | 0 | 0 |
| NM_032859 | 1 | 0 | 1 | 0 | 1 | 1 |
| NM_032860 | 1 | 1 | 1 | 1 | 0 | 1 |
| NM_032861 | 1 | 1 | 1 | 1 | 1 | 1 |
| NM_032862 | 1 | 1 | 1 | 1 | 0 | 0 |
| NM_032864 | 1 | 1 | 1 | 1 | 0 | 1 |
| NM_032865 | 1 | 0 | 1 | 0 | 0 | 0 |
| NM_032866 | 0 | 0 | 1 | 0 | 0 | 0 |
| NM_032867 | 1 | 1 | 1 | 1 | 0 | 1 |
| NM_032868 | 1 | 1 | 1 | 1 | 0 | 0 |
| NM_032869 | 1 | 0 | 1 | 0 | 0 | 0 |
| NM_032870 | 1 | 0 | 1 | 1 | 0 | 0 |
| NM_032871 | 1 | 1 | 1 | 1 | 1 | 1 |
| NM_032872 | 1 | 0 | 1 | 0 | 0 | 0 |
| NM_032873 | 1 | 1 | 1 | 0 | 1 | 1 |
| NM_032874 | 1 | 0 | 0 | 0 | 0 | 0 |
| NM_032875 | 1 | 1 | 1 | 1 | 0 | 1 |
| NM_032876 | 1 | 0 | 1 | 0 | 0 | 1 |
| NM_032878 | 1 | 1 | 1 | 1 | 1 | 1 |
| NM_032880 | 0 | 0 | 0 | 0 | 0 | 1 |
| NM_032881 | 1 | 0 | 1 | 1 | 1 | 1 |
| NM_032882 | 1 | 0 | 1 | 0 | 0 | 1 |
| NM_032883 | 1 | 1 | 1 | 1 | 1 | 1 |
| NM_032884 | 0 | 1 | 1 | 1 | 0 | 0 |
| NM_032885 | 1 | 0 | 1 | 0 | 0 | 0 |
| NM_032886 | 1 | 0 | 1 | 1 | 0 | 0 |
| NM_032887 | 1 | 1 | 1 | 1 | 0 | 0 |
| NM_032888 | 1 | 0 | 1 | 1 | 0 | 0 |
| NM_032889 | 1 | 1 | 1 | 1 | 1 | 1 |
| NM_032890 | 1 | 0 | 1 | 1 | 1 | 1 |
| NM_032891 | 1 | 0 | 1 | 0 | 0 | 0 |
| NM_032892 | 1 | 0 | 1 | 0 | 0 | 0 |
| NM_032895 | 1 | 0 | 1 | 1 | 1 | 1 |
| NM_032897 | 1 | 0 | 1 | 0 | 0 | 0 |
| NM_032898 | 1 | 1 | 1 | 1 | 0 | 0 |
| NM_032899 | 1 | 0 | 1 | 0 | 0 | 0 |
| NM_032900 | 1 | 1 | 1 | 1 | 0 | 0 |
| NM_032901 | 1 | 1 | 1 | 1 | 0 | 0 |
| NM_032902 | 1 | 1 | 1 | 1 | 1 | 1 |
| NM_032903 | 1 | 0 | 1 | 1 | 1 | 1 |

|           |   |   |   |   |   |   |
|-----------|---|---|---|---|---|---|
| NM_032904 | 1 | 0 | 1 | 0 | 0 | 1 |
| NM_032905 | 1 | 1 | 1 | 1 | 0 | 1 |
| NM_032906 | 1 | 1 | 1 | 1 | 0 | 1 |
| NM_032907 | 1 | 0 | 1 | 1 | 0 | 0 |
| NM_032908 | 1 | 0 | 1 | 0 | 0 | 0 |
| NM_032909 | 1 | 1 | 1 | 1 | 1 | 0 |
| NM_032910 | 1 | 0 | 1 | 1 | 1 | 1 |
| NM_032916 | 1 | 1 | 0 | 1 | 0 | 0 |
| NM_032917 | 1 | 0 | 1 | 0 | 0 | 0 |
| NM_032920 | 1 | 0 | 1 | 0 | 0 | 1 |
| NM_032923 | 1 | 0 | 0 | 0 | 0 | 1 |
| NM_032924 | 1 | 0 | 1 | 0 | 0 | 0 |
| NM_032926 | 1 | 1 | 1 | 1 | 0 | 0 |
| NM_032927 | 1 | 0 | 1 | 1 | 1 | 1 |
| NM_032928 | 1 | 0 | 1 | 1 | 0 | 0 |
| NM_032929 | 1 | 0 | 1 | 1 | 0 | 0 |
| NM_032932 | 1 | 0 | 1 | 1 | 0 | 0 |
| NM_032933 | 1 | 0 | 1 | 0 | 0 | 1 |
| NM_032936 | 1 | 0 | 1 | 0 | 0 | 0 |
| NM_032937 | 1 | 1 | 1 | 1 | 0 | 0 |
| NM_032941 | 1 | 0 | 1 | 0 | 0 | 0 |
| NM_032943 | 1 | 1 | 1 | 1 | 1 | 0 |
| NM_032944 | 1 | 1 | 1 | 1 | 1 | 0 |
| NM_032946 | 1 | 1 | 1 | 1 | 0 | 0 |
| NM_032947 | 1 | 0 | 1 | 1 | 0 | 1 |
| NM_032951 | 1 | 0 | 1 | 0 | 0 | 0 |
| NM_032957 | 1 | 1 | 1 | 1 | 0 | 0 |
| NM_032959 | 1 | 0 | 1 | 0 | 0 | 0 |
| NM_032965 | 1 | 0 | 0 | 0 | 0 | 0 |
| NM_032967 | 1 | 1 | 1 | 1 | 0 | 0 |
| NM_032968 | 0 | 0 | 0 | 1 | 0 | 0 |
| NM_032970 | 1 | 1 | 1 | 1 | 1 | 1 |
| NM_032971 | 1 | 1 | 1 | 1 | 0 | 0 |
| NM_032974 | 1 | 0 | 1 | 0 | 0 | 1 |
| NM_032976 | 1 | 1 | 1 | 1 | 0 | 0 |
| NM_032980 | 1 | 0 | 1 | 0 | 0 | 1 |
| NM_032982 | 1 | 0 | 1 | 0 | 0 | 0 |
| NM_032983 | 1 | 0 | 1 | 0 | 0 | 0 |
| NM_032984 | 1 | 0 | 1 | 0 | 0 | 0 |
| NM_032988 | 1 | 0 | 1 | 1 | 0 | 0 |
| NM_032989 | 1 | 0 | 1 | 0 | 0 | 0 |
| NM_032991 | 1 | 0 | 1 | 0 | 0 | 1 |
| NM_032992 | 1 | 1 | 1 | 1 | 0 | 1 |
| NM_032995 | 1 | 1 | 1 | 1 | 1 | 1 |
| NM_032996 | 1 | 1 | 1 | 1 | 0 | 0 |
| NM_032997 | 1 | 0 | 1 | 0 | 1 | 1 |
| NM_032998 | 1 | 1 | 1 | 1 | 1 | 1 |
| NM_033003 | 1 | 0 | 1 | 0 | 0 | 0 |
| NM_033004 | 1 | 0 | 1 | 0 | 0 | 1 |
| NM_033005 | 1 | 0 | 1 | 0 | 0 | 1 |
| NM_033006 | 1 | 0 | 1 | 0 | 0 | 0 |
| NM_033013 | 1 | 0 | 1 | 0 | 0 | 0 |

|           |   |   |   |   |   |   |
|-----------|---|---|---|---|---|---|
| NM_033014 | 0 | 0 | 1 | 0 | 0 | 0 |
| NM_033017 | 1 | 0 | 1 | 0 | 1 | 1 |
| NM_033018 | 1 | 1 | 1 | 1 | 0 | 0 |
| NM_033022 | 1 | 0 | 1 | 1 | 1 | 1 |
| NM_033023 | 1 | 0 | 1 | 1 | 0 | 0 |
| NM_033025 | 1 | 0 | 1 | 0 | 0 | 0 |
| NM_033027 | 1 | 0 | 1 | 0 | 0 | 0 |
| NM_033028 | 1 | 1 | 1 | 0 | 1 | 1 |
| NM_033029 | 1 | 1 | 1 | 1 | 0 | 1 |
| NM_033031 | 1 | 0 | 1 | 1 | 0 | 0 |
| NM_033033 | 1 | 0 | 1 | 0 | 0 | 0 |
| NM_033035 | 1 | 1 | 1 | 1 | 0 | 0 |
| NM_033036 | 1 | 0 | 1 | 0 | 0 | 0 |
| NM_033043 | 1 | 0 | 1 | 1 | 0 | 0 |
| NM_033044 | 1 | 0 | 1 | 1 | 0 | 0 |
| NM_033045 | 1 | 1 | 1 | 1 | 0 | 0 |
| NM_033046 | 1 | 1 | 1 | 1 | 1 | 0 |
| NM_033048 | 0 | 0 | 1 | 1 | 0 | 0 |
| NM_033049 | 1 | 0 | 1 | 0 | 0 | 0 |
| NM_033050 | 1 | 1 | 1 | 1 | 1 | 1 |
| NM_033051 | 1 | 1 | 1 | 1 | 1 | 1 |
| NM_033052 | 1 | 0 | 1 | 1 | 0 | 1 |
| NM_033053 | 1 | 1 | 1 | 1 | 0 | 0 |
| NM_033055 | 1 | 0 | 1 | 0 | 0 | 1 |
| NM_033056 | 0 | 0 | 0 | 0 | 0 | 1 |
| NM_033057 | 1 | 0 | 1 | 0 | 0 | 0 |
| NM_033058 | 0 | 1 | 0 | 1 | 0 | 0 |
| NM_033059 | 0 | 0 | 0 | 1 | 0 | 0 |
| NM_033060 | 1 | 0 | 1 | 0 | 0 | 0 |
| NM_033061 | 0 | 0 | 1 | 0 | 0 | 0 |
| NM_033062 | 0 | 0 | 0 | 0 | 0 | 1 |
| NM_033064 | 0 | 0 | 0 | 0 | 0 | 1 |
| NM_033066 | 1 | 0 | 1 | 0 | 0 | 0 |
| NM_033069 | 1 | 1 | 1 | 1 | 0 | 0 |
| NM_033071 | 1 | 0 | 1 | 1 | 1 | 1 |
| NM_033082 | 1 | 0 | 1 | 0 | 0 | 0 |
| NM_033083 | 1 | 0 | 1 | 0 | 0 | 0 |
| NM_033084 | 1 | 0 | 1 | 0 | 0 | 0 |
| NM_033085 | 1 | 1 | 1 | 1 | 0 | 1 |
| NM_033086 | 1 | 1 | 1 | 1 | 0 | 1 |
| NM_033087 | 1 | 0 | 1 | 0 | 0 | 0 |
| NM_033089 | 1 | 0 | 1 | 0 | 0 | 0 |
| NM_033090 | 1 | 0 | 1 | 0 | 1 | 1 |
| NM_033091 | 1 | 0 | 1 | 0 | 1 | 1 |
| NM_033092 | 1 | 0 | 1 | 0 | 0 | 0 |
| NM_033093 | 1 | 1 | 1 | 0 | 1 | 1 |
| NM_033100 | 1 | 1 | 1 | 1 | 0 | 0 |
| NM_033101 | 1 | 1 | 1 | 1 | 0 | 0 |
| NM_033102 | 1 | 0 | 1 | 0 | 0 | 1 |
| NM_033103 | 1 | 0 | 1 | 0 | 0 | 0 |
| NM_033104 | 1 | 0 | 1 | 0 | 0 | 0 |
| NM_033105 | 1 | 0 | 1 | 0 | 0 | 1 |



|           |   |   |   |   |   |   |
|-----------|---|---|---|---|---|---|
| NM_033106 | 1 | 0 | 1 | 0 | 0 | 0 |
| NM_033107 | 0 | 0 | 1 | 0 | 0 | 0 |
| NM_033109 | 1 | 1 | 1 | 0 | 0 | 0 |
| NM_033111 | 1 | 1 | 1 | 1 | 1 | 1 |
| NM_033112 | 1 | 0 | 1 | 0 | 0 | 0 |
| NM_033114 | 1 | 0 | 1 | 0 | 1 | 0 |
| NM_033115 | 1 | 1 | 1 | 1 | 1 | 1 |
| NM_033116 | 1 | 0 | 1 | 0 | 0 | 0 |
| NM_033117 | 1 | 0 | 1 | 1 | 0 | 0 |
| NM_033118 | 1 | 1 | 1 | 1 | 0 | 0 |
| NM_033119 | 1 | 1 | 1 | 1 | 0 | 0 |
| NM_033120 | 0 | 0 | 1 | 0 | 0 | 0 |
| NM_033124 | 1 | 0 | 1 | 1 | 0 | 1 |
| NM_033125 | 1 | 1 | 1 | 1 | 0 | 0 |
| NM_033127 | 0 | 1 | 0 | 0 | 0 | 0 |
| NM_033128 | 1 | 0 | 1 | 0 | 0 | 1 |
| NM_033130 | 1 | 1 | 1 | 1 | 0 | 0 |
| NM_033131 | 0 | 1 | 0 | 0 | 0 | 1 |
| NM_033133 | 1 | 0 | 1 | 0 | 1 | 1 |
| NM_033139 | 1 | 0 | 1 | 1 | 0 | 0 |
| NM_033143 | 0 | 0 | 0 | 0 | 0 | 1 |
| NM_033158 | 1 | 1 | 1 | 1 | 0 | 0 |
| NM_033159 | 1 | 0 | 1 | 0 | 0 | 0 |
| NM_033160 | 1 | 0 | 1 | 0 | 0 | 1 |
| NM_033161 | 1 | 1 | 1 | 1 | 0 | 0 |
| NM_033163 | 1 | 1 | 1 | 1 | 0 | 0 |
| NM_033167 | 1 | 0 | 1 | 0 | 0 | 0 |
| NM_033168 | 1 | 0 | 1 | 0 | 0 | 0 |
| NM_033169 | 1 | 0 | 0 | 0 | 0 | 0 |
| NM_033177 | 1 | 0 | 1 | 1 | 0 | 1 |
| NM_033178 | 1 | 1 | 1 | 1 | 0 | 0 |
| NM_033182 | 1 | 1 | 1 | 1 | 0 | 0 |
| NM_033183 | 1 | 0 | 1 | 1 | 0 | 0 |
| NM_033184 | 0 | 0 | 1 | 0 | 1 | 0 |
| NM_033185 | 0 | 0 | 0 | 1 | 0 | 1 |
| NM_033188 | 0 | 0 | 0 | 0 | 0 | 1 |
| NM_033191 | 0 | 1 | 0 | 0 | 0 | 0 |
| NM_033194 | 1 | 1 | 1 | 1 | 0 | 0 |
| NM_033196 | 1 | 0 | 1 | 0 | 0 | 0 |
| NM_033198 | 1 | 1 | 1 | 1 | 0 | 1 |
| NM_033199 | 0 | 1 | 0 | 1 | 0 | 0 |
| NM_033200 | 1 | 0 | 1 | 0 | 0 | 0 |
| NM_033201 | 1 | 1 | 1 | 1 | 1 | 1 |
| NM_033204 | 1 | 0 | 1 | 0 | 0 | 1 |
| NM_033208 | 1 | 1 | 1 | 1 | 0 | 0 |
| NM_033209 | 1 | 0 | 1 | 0 | 0 | 1 |
| NM_033210 | 1 | 0 | 1 | 1 | 0 | 0 |
| NM_033211 | 1 | 0 | 1 | 0 | 0 | 1 |
| NM_033212 | 1 | 1 | 1 | 1 | 0 | 0 |
| NM_033213 | 1 | 0 | 1 | 1 | 0 | 0 |
| NM_033214 | 1 | 0 | 0 | 0 | 0 | 0 |
| NM_033219 | 1 | 0 | 1 | 0 | 0 | 1 |

|           |   |   |   |   |   |   |
|-----------|---|---|---|---|---|---|
| NM_033220 | 1 | 0 | 1 | 1 | 0 | 0 |
| NM_033222 | 1 | 0 | 1 | 0 | 1 | 1 |
| NM_033223 | 1 | 0 | 1 | 0 | 0 | 1 |
| NM_033224 | 1 | 0 | 1 | 0 | 1 | 0 |
| NM_033225 | 1 | 0 | 1 | 0 | 0 | 0 |
| NM_033227 | 1 | 1 | 1 | 1 | 0 | 0 |
| NM_033229 | 0 | 1 | 0 | 0 | 0 | 0 |
| NM_033238 | 1 | 0 | 1 | 0 | 1 | 1 |
| NM_033246 | 1 | 0 | 1 | 0 | 1 | 1 |
| NM_033247 | 1 | 0 | 1 | 0 | 0 | 0 |
| NM_033253 | 1 | 1 | 1 | 0 | 0 | 0 |
| NM_033254 | 0 | 0 | 1 | 0 | 0 | 0 |
| NM_033255 | 1 | 0 | 1 | 0 | 1 | 1 |
| NM_033256 | 1 | 0 | 1 | 0 | 0 | 0 |
| NM_033257 | 1 | 1 | 1 | 1 | 0 | 0 |
| NM_033258 | 1 | 0 | 1 | 0 | 0 | 0 |
| NM_033259 | 1 | 0 | 1 | 0 | 0 | 0 |
| NM_033260 | 1 | 0 | 1 | 0 | 0 | 0 |
| NM_033261 | 1 | 0 | 1 | 0 | 0 | 0 |
| NM_033262 | 0 | 0 | 0 | 0 | 0 | 1 |
| NM_033266 | 1 | 0 | 1 | 1 | 1 | 1 |
| NM_033271 | 1 | 0 | 1 | 0 | 0 | 0 |
| NM_033272 | 1 | 1 | 1 | 1 | 1 | 1 |
| NM_033274 | 1 | 1 | 1 | 1 | 0 | 0 |
| NM_033276 | 1 | 0 | 1 | 0 | 0 | 0 |
| NM_033280 | 1 | 0 | 1 | 0 | 0 | 1 |
| NM_033281 | 1 | 0 | 1 | 0 | 1 | 1 |
| NM_033282 | 1 | 0 | 1 | 1 | 0 | 0 |
| NM_033285 | 1 | 1 | 1 | 1 | 0 | 0 |
| NM_033288 | 1 | 1 | 1 | 1 | 1 | 1 |
| NM_033290 | 1 | 0 | 1 | 0 | 0 | 1 |
| NM_033295 | 1 | 0 | 1 | 1 | 1 | 1 |
| NM_033296 | 1 | 0 | 1 | 1 | 0 | 1 |
| NM_033297 | 1 | 1 | 1 | 1 | 0 | 1 |
| NM_033302 | 0 | 0 | 0 | 0 | 0 | 1 |
| NM_033303 | 1 | 0 | 1 | 0 | 0 | 1 |
| NM_033305 | 1 | 0 | 1 | 1 | 1 | 1 |
| NM_033308 | 1 | 0 | 1 | 0 | 0 | 0 |
| NM_033309 | 1 | 1 | 1 | 1 | 0 | 1 |
| NM_033310 | 1 | 0 | 1 | 0 | 0 | 0 |
| NM_033312 | 0 | 0 | 1 | 0 | 0 | 0 |
| NM_033313 | 1 | 0 | 1 | 0 | 0 | 0 |
| NM_033315 | 0 | 0 | 1 | 0 | 0 | 0 |
| NM_033316 | 1 | 0 | 1 | 1 | 0 | 0 |
| NM_033317 | 1 | 1 | 1 | 1 | 0 | 0 |
| NM_033318 | 1 | 1 | 1 | 1 | 0 | 1 |
| NM_033328 | 0 | 0 | 0 | 0 | 0 | 1 |
| NM_033331 | 1 | 0 | 1 | 0 | 0 | 0 |
| NM_033332 | 1 | 0 | 1 | 0 | 0 | 0 |
| NM_033338 | 1 | 1 | 1 | 1 | 0 | 0 |
| NM_033341 | 1 | 0 | 1 | 1 | 0 | 0 |
| NM_033342 | 1 | 1 | 1 | 1 | 1 | 1 |

|           |   |   |   |   |   |   |
|-----------|---|---|---|---|---|---|
| NM_033343 | 1 | 0 | 0 | 0 | 0 | 0 |
| NM_033344 | 1 | 1 | 1 | 1 | 0 | 0 |
| NM_033347 | 1 | 0 | 1 | 0 | 0 | 0 |
| NM_033355 | 1 | 0 | 1 | 1 | 0 | 0 |
| NM_033358 | 1 | 0 | 1 | 0 | 0 | 1 |
| NM_033375 | 1 | 0 | 1 | 0 | 1 | 1 |
| NM_033377 | 1 | 0 | 1 | 1 | 0 | 0 |
| NM_033378 | 1 | 0 | 1 | 1 | 0 | 0 |
| NM_033379 | 1 | 0 | 1 | 0 | 1 | 1 |
| NM_033386 | 0 | 0 | 1 | 0 | 0 | 0 |
| NM_033387 | 1 | 1 | 1 | 1 | 0 | 0 |
| NM_033389 | 1 | 0 | 1 | 0 | 0 | 0 |
| NM_033392 | 1 | 0 | 0 | 0 | 0 | 1 |
| NM_033396 | 1 | 1 | 1 | 1 | 0 | 0 |
| NM_033397 | 1 | 1 | 1 | 1 | 0 | 0 |
| NM_033401 | 1 | 1 | 1 | 1 | 0 | 1 |
| NM_033402 | 1 | 1 | 1 | 0 | 0 | 1 |
| NM_033405 | 1 | 1 | 1 | 1 | 0 | 0 |
| NM_033406 | 1 | 0 | 1 | 0 | 0 | 0 |
| NM_033408 | 1 | 1 | 1 | 1 | 1 | 1 |
| NM_033409 | 1 | 0 | 1 | 0 | 0 | 1 |
| NM_033410 | 1 | 0 | 1 | 1 | 0 | 1 |
| NM_033411 | 1 | 1 | 1 | 1 | 1 | 1 |
| NM_033412 | 1 | 1 | 1 | 1 | 0 | 0 |
| NM_033413 | 1 | 0 | 1 | 1 | 0 | 0 |
| NM_033414 | 1 | 1 | 1 | 1 | 0 | 0 |
| NM_033415 | 1 | 0 | 1 | 0 | 0 | 1 |
| NM_033416 | 1 | 1 | 1 | 1 | 0 | 0 |
| NM_033418 | 1 | 0 | 1 | 0 | 1 | 1 |
| NM_033419 | 1 | 1 | 1 | 1 | 1 | 1 |
| NM_033420 | 1 | 0 | 1 | 1 | 0 | 0 |
| NM_033421 | 1 | 0 | 1 | 0 | 0 | 1 |
| NM_033423 | 1 | 0 | 1 | 1 | 1 | 0 |
| NM_033424 | 0 | 0 | 0 | 0 | 0 | 1 |
| NM_033426 | 1 | 0 | 1 | 0 | 1 | 1 |
| NM_033427 | 1 | 1 | 1 | 0 | 1 | 1 |
| NM_033437 | 1 | 0 | 1 | 0 | 0 | 0 |
| NM_033438 | 1 | 1 | 1 | 1 | 0 | 0 |
| NM_033440 | 0 | 0 | 1 | 0 | 0 | 0 |
| NM_033445 | 1 | 1 | 1 | 0 | 0 | 0 |
| NM_033448 | 0 | 0 | 0 | 1 | 1 | 1 |
| NM_033449 | 1 | 1 | 1 | 0 | 0 | 1 |
| NM_033450 | 1 | 0 | 1 | 1 | 0 | 0 |
| NM_033452 | 1 | 0 | 1 | 0 | 0 | 0 |
| NM_033467 | 1 | 1 | 1 | 1 | 0 | 1 |
| NM_033468 | 1 | 0 | 1 | 1 | 0 | 1 |
| NM_033480 | 1 | 0 | 1 | 1 | 0 | 0 |
| NM_033484 | 1 | 0 | 1 | 0 | 0 | 1 |
| NM_033493 | 1 | 0 | 1 | 0 | 0 | 1 |
| NM_033495 | 1 | 1 | 1 | 1 | 0 | 0 |
| NM_033497 | 1 | 1 | 1 | 1 | 0 | 1 |
| NM_033503 | 1 | 1 | 1 | 1 | 0 | 0 |

|           |   |   |   |   |   |   |
|-----------|---|---|---|---|---|---|
| NM_033504 | 0 | 0 | 1 | 0 | 0 | 0 |
| NM_033510 | 1 | 1 | 1 | 1 | 0 | 0 |
| NM_033512 | 1 | 1 | 1 | 1 | 1 | 1 |
| NM_033514 | 1 | 1 | 1 | 1 | 1 | 1 |
| NM_033515 | 1 | 1 | 1 | 1 | 0 | 0 |
| NM_033518 | 1 | 0 | 1 | 1 | 0 | 1 |
| NM_033519 | 1 | 1 | 1 | 0 | 0 | 0 |
| NM_033531 | 1 | 0 | 1 | 0 | 0 | 1 |
| NM_033540 | 1 | 0 | 1 | 0 | 0 | 0 |
| NM_033542 | 1 | 0 | 1 | 1 | 0 | 0 |
| NM_033543 | 1 | 1 | 1 | 1 | 0 | 0 |
| NM_033546 | 1 | 0 | 1 | 1 | 0 | 0 |
| NM_033547 | 1 | 0 | 1 | 0 | 0 | 0 |
| NM_033548 | 1 | 0 | 1 | 0 | 0 | 1 |
| NM_033549 | 1 | 0 | 1 | 0 | 1 | 1 |
| NM_033550 | 1 | 0 | 0 | 0 | 0 | 0 |
| NM_033551 | 1 | 1 | 1 | 1 | 0 | 1 |
| NM_033554 | 1 | 0 | 1 | 0 | 0 | 1 |
| NM_033557 | 1 | 0 | 1 | 0 | 0 | 0 |
| NM_033559 | 1 | 0 | 1 | 0 | 0 | 1 |
| NM_033621 | 1 | 0 | 1 | 0 | 0 | 0 |
| NM_033625 | 1 | 0 | 1 | 0 | 0 | 0 |
| NM_033626 | 1 | 1 | 1 | 1 | 0 | 0 |
| NM_033627 | 1 | 1 | 1 | 1 | 1 | 1 |
| NM_033630 | 0 | 1 | 0 | 1 | 0 | 0 |
| NM_033631 | 1 | 0 | 1 | 0 | 0 | 0 |
| NM_033632 | 1 | 0 | 1 | 0 | 0 | 0 |
| NM_033634 | 1 | 0 | 1 | 0 | 0 | 1 |
| NM_033635 | 1 | 0 | 1 | 0 | 0 | 0 |
| NM_033637 | 1 | 0 | 1 | 1 | 0 | 0 |
| NM_033640 | 1 | 0 | 1 | 0 | 0 | 0 |
| NM_033642 | 1 | 0 | 1 | 0 | 0 | 0 |
| NM_033644 | 1 | 1 | 1 | 1 | 0 | 0 |
| NM_033647 | 1 | 0 | 1 | 1 | 0 | 1 |
| NM_033655 | 1 | 1 | 1 | 1 | 0 | 0 |
| NM_033656 | 1 | 0 | 1 | 0 | 0 | 0 |
| NM_033659 | 1 | 0 | 1 | 0 | 0 | 0 |
| NM_033661 | 1 | 1 | 1 | 1 | 0 | 1 |
| NM_033662 | 1 | 1 | 1 | 1 | 0 | 0 |
| NM_033664 | 0 | 0 | 0 | 0 | 0 | 1 |
| NM_033666 | 1 | 0 | 1 | 0 | 0 | 1 |
| NM_033667 | 1 | 1 | 1 | 1 | 0 | 0 |
| NM_033668 | 1 | 0 | 1 | 0 | 0 | 0 |
| NM_033669 | 1 | 1 | 1 | 1 | 0 | 0 |
| NM_044472 | 1 | 1 | 1 | 0 | 0 | 1 |
| NM_048368 | 1 | 1 | 1 | 1 | 0 | 0 |
| NM_052812 | 0 | 0 | 0 | 0 | 0 | 1 |
| NM_052813 | 1 | 1 | 1 | 1 | 0 | 0 |
| NM_052818 | 1 | 0 | 1 | 1 | 0 | 0 |
| NM_052819 | 1 | 0 | 1 | 1 | 0 | 0 |
| NM_052820 | 1 | 0 | 1 | 0 | 0 | 0 |
| NM_052821 | 1 | 0 | 1 | 1 | 0 | 0 |

|           |   |   |   |   |   |   |
|-----------|---|---|---|---|---|---|
| NM_052822 | 1 | 1 | 1 | 1 | 1 | 1 |
| NM_052825 | 1 | 1 | 1 | 1 | 0 | 0 |
| NM_052826 | 1 | 1 | 1 | 1 | 0 | 0 |
| NM_052827 | 1 | 1 | 1 | 1 | 0 | 0 |
| NM_052828 | 1 | 1 | 1 | 1 | 0 | 0 |
| NM_052831 | 1 | 0 | 1 | 1 | 1 | 0 |
| NM_052832 | 1 | 1 | 1 | 1 | 1 | 0 |
| NM_052834 | 1 | 0 | 1 | 1 | 0 | 1 |
| NM_052836 | 1 | 1 | 1 | 1 | 0 | 0 |
| NM_052838 | 1 | 0 | 1 | 0 | 0 | 1 |
| NM_052839 | 1 | 0 | 0 | 0 | 0 | 1 |
| NM_052840 | 1 | 1 | 1 | 1 | 0 | 0 |
| NM_052841 | 1 | 0 | 1 | 0 | 0 | 0 |
| NM_052844 | 1 | 1 | 1 | 1 | 0 | 1 |
| NM_052845 | 1 | 0 | 1 | 0 | 0 | 0 |
| NM_052847 | 1 | 1 | 1 | 1 | 0 | 0 |
| NM_052848 | 1 | 1 | 1 | 1 | 1 | 1 |
| NM_052849 | 1 | 0 | 1 | 1 | 0 | 1 |
| NM_052850 | 1 | 1 | 1 | 1 | 0 | 0 |
| NM_052852 | 1 | 0 | 1 | 0 | 0 | 0 |
| NM_052853 | 1 | 1 | 1 | 1 | 0 | 0 |
| NM_052855 | 1 | 1 | 1 | 1 | 0 | 1 |
| NM_052857 | 1 | 0 | 1 | 1 | 0 | 0 |
| NM_052858 | 1 | 0 | 0 | 0 | 0 | 0 |
| NM_052859 | 1 | 0 | 1 | 0 | 0 | 0 |
| NM_052860 | 1 | 0 | 1 | 0 | 1 | 0 |
| NM_052861 | 1 | 1 | 1 | 1 | 1 | 1 |
| NM_052862 | 1 | 1 | 1 | 1 | 0 | 1 |
| NM_052863 | 1 | 0 | 1 | 0 | 0 | 1 |
| NM_052864 | 1 | 0 | 1 | 0 | 1 | 1 |
| NM_052865 | 1 | 1 | 1 | 1 | 0 | 0 |
| NM_052866 | 0 | 0 | 0 | 0 | 0 | 1 |
| NM_052867 | 0 | 1 | 1 | 1 | 0 | 0 |
| NM_052868 | 1 | 1 | 1 | 1 | 0 | 1 |
| NM_052870 | 1 | 1 | 1 | 1 | 0 | 0 |
| NM_052871 | 1 | 0 | 1 | 0 | 1 | 1 |
| NM_052872 | 1 | 0 | 1 | 0 | 0 | 0 |
| NM_052873 | 1 | 1 | 1 | 1 | 0 | 0 |
| NM_052874 | 1 | 1 | 1 | 1 | 0 | 0 |
| NM_052875 | 1 | 0 | 1 | 0 | 0 | 0 |
| NM_052876 | 1 | 0 | 1 | 0 | 0 | 0 |
| NM_052877 | 1 | 0 | 1 | 0 | 0 | 1 |
| NM_052879 | 1 | 0 | 1 | 1 | 0 | 0 |
| NM_052880 | 1 | 1 | 1 | 1 | 1 | 1 |
| NM_052881 | 1 | 1 | 1 | 1 | 1 | 1 |
| NM_052885 | 1 | 1 | 1 | 1 | 0 | 0 |
| NM_052886 | 1 | 1 | 1 | 1 | 0 | 0 |
| NM_052887 | 1 | 0 | 1 | 1 | 0 | 0 |
| NM_052888 | 1 | 0 | 1 | 1 | 1 | 0 |
| NM_052889 | 1 | 1 | 1 | 1 | 0 | 0 |
| NM_052890 | 1 | 0 | 1 | 0 | 0 | 0 |
| NM_052891 | 1 | 0 | 0 | 0 | 0 | 1 |

|           |   |   |   |   |   |   |
|-----------|---|---|---|---|---|---|
| NM_052896 | 1 | 0 | 1 | 1 | 0 | 0 |
| NM_052897 | 1 | 1 | 1 | 1 | 0 | 1 |
| NM_052899 | 1 | 0 | 1 | 1 | 0 | 0 |
| NM_052902 | 1 | 0 | 1 | 1 | 0 | 0 |
| NM_052903 | 1 | 0 | 1 | 0 | 1 | 1 |
| NM_052904 | 1 | 0 | 1 | 0 | 0 | 0 |
| NM_052913 | 1 | 0 | 1 | 0 | 0 | 0 |
| NM_052918 | 0 | 1 | 0 | 0 | 0 | 1 |
| NM_052924 | 1 | 1 | 1 | 1 | 0 | 0 |
| NM_052925 | 1 | 0 | 1 | 0 | 0 | 0 |
| NM_052926 | 1 | 0 | 1 | 0 | 0 | 0 |
| NM_052932 | 1 | 0 | 1 | 0 | 0 | 0 |
| NM_052934 | 1 | 0 | 1 | 0 | 0 | 0 |
| NM_052935 | 1 | 1 | 1 | 1 | 0 | 0 |
| NM_052936 | 1 | 0 | 1 | 0 | 0 | 0 |
| NM_052937 | 1 | 1 | 1 | 1 | 0 | 0 |
| NM_052938 | 1 | 0 | 1 | 1 | 1 | 1 |
| NM_052939 | 1 | 0 | 1 | 1 | 0 | 0 |
| NM_052940 | 1 | 0 | 1 | 1 | 0 | 1 |
| NM_052941 | 1 | 1 | 1 | 1 | 1 | 1 |
| NM_052942 | 1 | 1 | 1 | 1 | 0 | 0 |
| NM_052943 | 1 | 1 | 1 | 0 | 0 | 1 |
| NM_052944 | 1 | 0 | 1 | 1 | 0 | 0 |
| NM_052945 | 1 | 0 | 1 | 0 | 0 | 0 |
| NM_052947 | 1 | 0 | 1 | 0 | 0 | 1 |
| NM_052948 | 1 | 0 | 1 | 0 | 0 | 0 |
| NM_052949 | 1 | 0 | 1 | 1 | 1 | 1 |
| NM_052950 | 1 | 1 | 1 | 0 | 1 | 1 |
| NM_052951 | 1 | 1 | 1 | 1 | 1 | 1 |
| NM_052954 | 1 | 0 | 1 | 0 | 1 | 0 |
| NM_052956 | 1 | 1 | 1 | 1 | 0 | 0 |
| NM_052957 | 1 | 1 | 1 | 1 | 1 | 1 |
| NM_052958 | 0 | 0 | 0 | 0 | 0 | 1 |
| NM_052960 | 1 | 0 | 1 | 1 | 1 | 1 |
| NM_052961 | 1 | 0 | 1 | 1 | 0 | 0 |
| NM_052962 | 0 | 0 | 1 | 0 | 0 | 0 |
| NM_052963 | 1 | 0 | 1 | 1 | 1 | 1 |
| NM_052965 | 1 | 0 | 1 | 1 | 1 | 1 |
| NM_052966 | 1 | 0 | 1 | 1 | 0 | 1 |
| NM_052967 | 1 | 0 | 1 | 0 | 0 | 0 |
| NM_052968 | 0 | 0 | 1 | 0 | 0 | 0 |
| NM_052969 | 1 | 1 | 1 | 1 | 0 | 0 |
| NM_052971 | 1 | 0 | 1 | 1 | 1 | 1 |
| NM_052972 | 1 | 1 | 1 | 1 | 1 | 1 |
| NM_052978 | 1 | 0 | 1 | 0 | 0 | 0 |
| NM_052984 | 1 | 0 | 1 | 1 | 0 | 0 |
| NM_052985 | 1 | 0 | 1 | 0 | 0 | 0 |
| NM_052996 | 1 | 0 | 1 | 1 | 0 | 0 |
| NM_052997 | 1 | 0 | 0 | 0 | 0 | 0 |
| NM_052998 | 1 | 1 | 1 | 0 | 0 | 1 |
| NM_053000 | 1 | 1 | 1 | 1 | 1 | 1 |
| NM_053002 | 1 | 0 | 1 | 0 | 0 | 0 |

|           |   |   |   |   |   |   |
|-----------|---|---|---|---|---|---|
| NM_053003 | 1 | 0 | 1 | 0 | 0 | 1 |
| NM_053004 | 1 | 0 | 1 | 0 | 0 | 0 |
| NM_053005 | 1 | 0 | 1 | 0 | 0 | 0 |
| NM_053006 | 1 | 0 | 0 | 0 | 0 | 0 |
| NM_053013 | 1 | 1 | 0 | 0 | 0 | 0 |
| NM_053016 | 1 | 0 | 1 | 0 | 0 | 0 |
| NM_053017 | 1 | 0 | 1 | 0 | 0 | 1 |
| NM_053023 | 1 | 0 | 1 | 1 | 0 | 1 |
| NM_053027 | 1 | 0 | 1 | 1 | 0 | 0 |
| NM_053034 | 1 | 1 | 1 | 0 | 0 | 0 |
| NM_053035 | 1 | 1 | 1 | 1 | 0 | 1 |
| NM_053036 | 1 | 0 | 1 | 0 | 0 | 0 |
| NM_053039 | 1 | 1 | 1 | 1 | 0 | 0 |
| NM_053040 | 1 | 1 | 1 | 1 | 1 | 1 |
| NM_053041 | 1 | 1 | 1 | 1 | 0 | 0 |
| NM_053043 | 1 | 1 | 1 | 0 | 0 | 0 |
| NM_053044 | 1 | 0 | 1 | 0 | 0 | 1 |
| NM_053045 | 1 | 1 | 1 | 1 | 1 | 1 |
| NM_053047 | 1 | 1 | 1 | 1 | 0 | 1 |
| NM_053048 | 1 | 1 | 1 | 1 | 1 | 1 |
| NM_053049 | 1 | 0 | 1 | 0 | 0 | 0 |
| NM_053050 | 1 | 1 | 1 | 1 | 0 | 0 |
| NM_053051 | 1 | 0 | 1 | 0 | 0 | 0 |
| NM_053052 | 1 | 0 | 1 | 1 | 0 | 1 |
| NM_053053 | 1 | 0 | 1 | 1 | 1 | 0 |
| NM_053054 | 1 | 0 | 1 | 1 | 0 | 1 |
| NM_053055 | 1 | 1 | 1 | 1 | 0 | 0 |
| NM_053056 | 1 | 1 | 1 | 1 | 0 | 0 |
| NM_053067 | 1 | 0 | 1 | 0 | 1 | 1 |
| NM_053276 | 1 | 1 | 1 | 1 | 0 | 0 |
| NM_053277 | 1 | 0 | 1 | 0 | 0 | 1 |
| NM_053278 | 1 | 0 | 1 | 1 | 0 | 0 |
| NM_053279 | 1 | 1 | 1 | 0 | 1 | 1 |
| NM_053280 | 1 | 0 | 1 | 0 | 0 | 0 |
| NM_053281 | 1 | 0 | 1 | 0 | 0 | 0 |
| NM_053282 | 1 | 1 | 1 | 1 | 1 | 1 |
| NM_053283 | 0 | 0 | 0 | 0 | 0 | 1 |
| NM_053284 | 1 | 0 | 1 | 0 | 0 | 0 |
| NM_053285 | 1 | 1 | 1 | 1 | 0 | 1 |
| NM_054013 | 1 | 1 | 1 | 1 | 0 | 1 |
| NM_054014 | 1 | 0 | 1 | 0 | 0 | 0 |
| NM_054016 | 1 | 0 | 1 | 0 | 0 | 0 |
| NM_054017 | 1 | 0 | 1 | 0 | 0 | 1 |
| NM_054020 | 1 | 1 | 1 | 1 | 1 | 1 |
| NM_054021 | 0 | 0 | 0 | 1 | 0 | 0 |
| NM_054022 | 1 | 0 | 1 | 1 | 0 | 0 |
| NM_054023 | 1 | 0 | 1 | 0 | 0 | 1 |
| NM_054025 | 1 | 1 | 1 | 1 | 0 | 1 |
| NM_054026 | 1 | 0 | 1 | 0 | 0 | 0 |
| NM_054027 | 1 | 0 | 1 | 1 | 0 | 1 |
| NM_054028 | 1 | 0 | 1 | 0 | 0 | 0 |
| NM_054029 | 1 | 0 | 1 | 0 | 0 | 0 |

|           |   |   |   |   |   |   |
|-----------|---|---|---|---|---|---|
| NM_054030 | 1 | 0 | 0 | 0 | 0 | 0 |
| NM_054032 | 1 | 0 | 1 | 1 | 0 | 0 |
| NM_054033 | 1 | 0 | 1 | 0 | 0 | 1 |
| NM_054034 | 0 | 0 | 0 | 0 | 0 | 1 |
| NM_054108 | 0 | 1 | 0 | 0 | 0 | 0 |
| NM_054110 | 0 | 0 | 1 | 0 | 0 | 0 |
| NM_054112 | 0 | 1 | 0 | 1 | 0 | 0 |
| NM_054113 | 0 | 0 | 0 | 0 | 0 | 1 |
| NM_054114 | 1 | 0 | 1 | 0 | 1 | 0 |
| NM_057088 | 1 | 1 | 1 | 1 | 0 | 0 |
| NM_057089 | 1 | 0 | 1 | 0 | 0 | 0 |
| NM_057091 | 1 | 1 | 1 | 1 | 0 | 0 |
| NM_057092 | 1 | 1 | 1 | 1 | 0 | 0 |
| NM_057093 | 0 | 0 | 0 | 0 | 0 | 1 |
| NM_057095 | 1 | 0 | 1 | 0 | 0 | 0 |
| NM_057157 | 1 | 1 | 1 | 1 | 0 | 0 |
| NM_057158 | 1 | 0 | 1 | 0 | 0 | 0 |
| NM_057159 | 1 | 1 | 1 | 1 | 1 | 1 |
| NM_057161 | 1 | 0 | 1 | 1 | 0 | 1 |
| NM_057162 | 1 | 0 | 1 | 0 | 0 | 0 |
| NM_057163 | 1 | 1 | 1 | 0 | 1 | 0 |
| NM_057170 | 1 | 0 | 1 | 1 | 0 | 0 |
| NM_057174 | 1 | 0 | 1 | 1 | 0 | 0 |
| NM_057178 | 1 | 1 | 1 | 1 | 1 | 1 |
| NM_057179 | 1 | 1 | 1 | 0 | 0 | 1 |
| NM_057180 | 1 | 0 | 1 | 1 | 0 | 0 |
| NM_057749 | 1 | 0 | 1 | 0 | 0 | 1 |
| NM_058163 | 1 | 0 | 1 | 0 | 1 | 0 |
| NM_058164 | 1 | 0 | 1 | 0 | 0 | 0 |
| NM_058165 | 1 | 1 | 1 | 1 | 0 | 0 |
| NM_058166 | 1 | 0 | 1 | 0 | 0 | 0 |
| NM_058167 | 1 | 0 | 1 | 0 | 0 | 1 |
| NM_058168 | 1 | 0 | 1 | 1 | 0 | 0 |
| NM_058169 | 1 | 0 | 1 | 0 | 0 | 0 |
| NM_058171 | 1 | 1 | 1 | 1 | 0 | 0 |
| NM_058172 | 1 | 1 | 1 | 1 | 1 | 1 |
| NM_058173 | 1 | 1 | 0 | 0 | 0 | 1 |
| NM_058174 | 1 | 0 | 1 | 0 | 0 | 0 |
| NM_058176 | 0 | 1 | 0 | 1 | 0 | 0 |
| NM_058177 | 1 | 0 | 1 | 1 | 1 | 0 |
| NM_058179 | 1 | 1 | 1 | 1 | 0 | 0 |
| NM_058180 | 1 | 0 | 1 | 0 | 0 | 0 |
| NM_058182 | 1 | 0 | 1 | 1 | 0 | 0 |
| NM_058184 | 0 | 0 | 1 | 0 | 0 | 1 |
| NM_058186 | 1 | 0 | 1 | 0 | 0 | 0 |
| NM_058187 | 1 | 0 | 1 | 1 | 1 | 0 |
| NM_058188 | 1 | 0 | 1 | 0 | 1 | 0 |
| NM_058189 | 1 | 0 | 1 | 0 | 0 | 0 |
| NM_058190 | 1 | 0 | 1 | 0 | 0 | 0 |
| NM_058191 | 1 | 0 | 1 | 1 | 0 | 0 |
| NM_058192 | 1 | 1 | 1 | 1 | 0 | 1 |
| NM_058193 | 1 | 1 | 1 | 1 | 0 | 0 |



|           |   |   |   |   |   |   |
|-----------|---|---|---|---|---|---|
| NM_058195 | 1 | 1 | 1 | 1 | 1 | 1 |
| NM_058201 | 1 | 0 | 1 | 0 | 0 | 0 |
| NM_058203 | 1 | 0 | 1 | 1 | 0 | 0 |
| NM_058217 | 1 | 0 | 1 | 1 | 0 | 1 |
| NM_058219 | 1 | 0 | 1 | 0 | 0 | 0 |
| NM_058222 | 1 | 0 | 1 | 1 | 0 | 0 |
| NM_058229 | 1 | 1 | 1 | 1 | 1 | 1 |
| NM_058230 | 1 | 0 | 1 | 1 | 0 | 0 |
| NM_058237 | 1 | 1 | 1 | 1 | 1 | 0 |
| NM_058238 | 1 | 0 | 1 | 0 | 0 | 0 |
| NM_058241 | 1 | 1 | 1 | 1 | 1 | 0 |
| NM_058243 | 1 | 0 | 1 | 0 | 0 | 0 |
| NM_058244 | 1 | 0 | 0 | 0 | 0 | 1 |
| NM_058246 | 1 | 0 | 1 | 1 | 1 | 1 |
| NM_058248 | 1 | 1 | 1 | 1 | 0 | 0 |
| NM_078468 | 1 | 1 | 1 | 1 | 0 | 0 |
| NM_078470 | 1 | 0 | 1 | 0 | 0 | 0 |
| NM_078471 | 1 | 1 | 1 | 0 | 1 | 1 |
| NM_078473 | 1 | 0 | 1 | 0 | 1 | 1 |
| NM_078474 | 1 | 1 | 1 | 1 | 0 | 0 |
| NM_078476 | 1 | 0 | 1 | 1 | 1 | 1 |
| NM_078480 | 1 | 1 | 1 | 1 | 0 | 0 |
| NM_078481 | 1 | 1 | 1 | 1 | 0 | 0 |
| NM_078483 | 1 | 0 | 1 | 0 | 0 | 1 |
| NM_078485 | 1 | 1 | 1 | 0 | 0 | 1 |
| NM_078487 | 1 | 1 | 1 | 1 | 0 | 0 |
| NM_078625 | 1 | 1 | 1 | 1 | 0 | 1 |
| NM_078628 | 1 | 0 | 1 | 0 | 0 | 0 |
| NM_078629 | 1 | 0 | 1 | 0 | 1 | 1 |
| NM_078630 | 1 | 0 | 1 | 0 | 1 | 1 |
| NM_079422 | 0 | 0 | 1 | 0 | 0 | 0 |
| NM_079834 | 1 | 1 | 1 | 1 | 0 | 1 |
| NM_079836 | 1 | 0 | 1 | 0 | 1 | 0 |
| NM_079837 | 1 | 1 | 1 | 1 | 0 | 1 |
| NM_080282 | 1 | 0 | 1 | 1 | 0 | 0 |
| NM_080283 | 0 | 1 | 0 | 0 | 0 | 1 |
| NM_080387 | 1 | 1 | 1 | 1 | 0 | 0 |
| NM_080388 | 1 | 0 | 0 | 0 | 0 | 0 |
| NM_080389 | 1 | 0 | 0 | 0 | 0 | 0 |
| NM_080390 | 1 | 1 | 1 | 1 | 0 | 1 |
| NM_080391 | 1 | 0 | 1 | 0 | 0 | 1 |
| NM_080413 | 1 | 0 | 1 | 0 | 0 | 0 |
| NM_080422 | 1 | 1 | 1 | 1 | 1 | 1 |
| NM_080425 | 1 | 1 | 1 | 1 | 0 | 0 |
| NM_080429 | 1 | 0 | 1 | 1 | 0 | 1 |
| NM_080430 | 1 | 1 | 1 | 1 | 0 | 0 |
| NM_080431 | 1 | 0 | 0 | 0 | 0 | 1 |
| NM_080432 | 1 | 0 | 1 | 0 | 0 | 0 |
| NM_080473 | 1 | 0 | 1 | 0 | 0 | 0 |
| NM_080474 | 1 | 0 | 0 | 0 | 0 | 0 |
| NM_080475 | 1 | 1 | 0 | 1 | 0 | 0 |
| NM_080476 | 1 | 0 | 0 | 0 | 0 | 1 |

|           |   |   |   |   |   |   |
|-----------|---|---|---|---|---|---|
| NM_080491 | 1 | 1 | 1 | 1 | 0 | 0 |
| NM_080541 | 1 | 1 | 1 | 1 | 0 | 0 |
| NM_080546 | 1 | 1 | 1 | 1 | 0 | 1 |
| NM_080551 | 1 | 0 | 1 | 0 | 0 | 0 |
| NM_080552 | 0 | 0 | 0 | 0 | 0 | 1 |
| NM_080590 | 1 | 0 | 1 | 1 | 0 | 0 |
| NM_080591 | 1 | 0 | 1 | 0 | 0 | 0 |
| NM_080593 | 0 | 1 | 1 | 0 | 0 | 0 |
| NM_080594 | 1 | 0 | 1 | 0 | 0 | 0 |
| NM_080596 | 1 | 0 | 1 | 0 | 0 | 1 |
| NM_080597 | 1 | 0 | 1 | 0 | 0 | 1 |
| NM_080598 | 1 | 0 | 1 | 1 | 1 | 1 |
| NM_080600 | 1 | 0 | 1 | 0 | 0 | 0 |
| NM_080603 | 1 | 1 | 1 | 0 | 1 | 0 |
| NM_080604 | 1 | 1 | 1 | 1 | 0 | 1 |
| NM_080605 | 0 | 0 | 1 | 0 | 0 | 0 |
| NM_080607 | 1 | 1 | 1 | 1 | 0 | 0 |
| NM_080608 | 1 | 0 | 1 | 1 | 0 | 0 |
| NM_080610 | 0 | 0 | 1 | 1 | 0 | 0 |
| NM_080612 | 1 | 0 | 1 | 0 | 1 | 0 |
| NM_080614 | 1 | 0 | 1 | 0 | 0 | 0 |
| NM_080616 | 1 | 0 | 1 | 0 | 0 | 0 |
| NM_080618 | 1 | 1 | 1 | 1 | 0 | 0 |
| NM_080621 | 1 | 1 | 1 | 1 | 1 | 0 |
| NM_080622 | 1 | 0 | 1 | 0 | 0 | 0 |
| NM_080626 | 1 | 1 | 1 | 1 | 1 | 0 |
| NM_080631 | 1 | 1 | 1 | 1 | 0 | 0 |
| NM_080632 | 1 | 0 | 1 | 1 | 1 | 1 |
| NM_080645 | 0 | 0 | 0 | 0 | 0 | 1 |
| NM_080646 | 1 | 0 | 1 | 0 | 1 | 1 |
| NM_080647 | 1 | 1 | 1 | 1 | 0 | 0 |
| NM_080648 | 1 | 1 | 1 | 1 | 0 | 0 |
| NM_080650 | 1 | 0 | 1 | 0 | 0 | 0 |
| NM_080651 | 1 | 0 | 1 | 1 | 0 | 0 |
| NM_080652 | 1 | 0 | 1 | 0 | 0 | 0 |
| NM_080653 | 1 | 1 | 1 | 1 | 0 | 0 |
| NM_080654 | 1 | 0 | 0 | 0 | 0 | 1 |
| NM_080655 | 1 | 1 | 1 | 1 | 0 | 1 |
| NM_080656 | 1 | 0 | 1 | 1 | 0 | 0 |
| NM_080657 | 1 | 0 | 1 | 0 | 1 | 1 |
| NM_080658 | 1 | 0 | 1 | 1 | 1 | 0 |
| NM_080659 | 0 | 0 | 0 | 0 | 0 | 1 |
| NM_080660 | 1 | 0 | 1 | 0 | 0 | 0 |
| NM_080661 | 1 | 0 | 1 | 0 | 0 | 1 |
| NM_080662 | 1 | 1 | 1 | 1 | 1 | 1 |
| NM_080663 | 0 | 0 | 0 | 0 | 0 | 1 |
| NM_080664 | 1 | 1 | 1 | 1 | 0 | 1 |
| NM_080665 | 1 | 0 | 1 | 1 | 0 | 0 |
| NM_080666 | 1 | 0 | 1 | 1 | 0 | 0 |
| NM_080667 | 1 | 1 | 1 | 1 | 1 | 1 |
| NM_080668 | 1 | 0 | 1 | 0 | 0 | 0 |
| NM_080669 | 0 | 1 | 1 | 1 | 0 | 0 |

|           |   |   |   |   |   |   |
|-----------|---|---|---|---|---|---|
| NM_080670 | 1 | 1 | 1 | 1 | 0 | 0 |
| NM_080672 | 1 | 0 | 1 | 0 | 0 | 0 |
| NM_080674 | 1 | 0 | 0 | 0 | 0 | 1 |
| NM_080675 | 0 | 0 | 0 | 0 | 0 | 1 |
| NM_080676 | 1 | 0 | 1 | 0 | 0 | 0 |
| NM_080677 | 1 | 1 | 1 | 1 | 1 | 1 |
| NM_080678 | 1 | 0 | 1 | 0 | 0 | 0 |
| NM_080680 | 1 | 0 | 1 | 0 | 0 | 1 |
| NM_080683 | 1 | 1 | 1 | 1 | 1 | 1 |
| NM_080686 | 1 | 0 | 1 | 1 | 0 | 0 |
| NM_080700 | 1 | 0 | 1 | 0 | 0 | 0 |
| NM_080703 | 1 | 0 | 1 | 0 | 0 | 0 |
| NM_080718 | 1 | 1 | 1 | 1 | 0 | 0 |
| NM_080722 | 1 | 0 | 1 | 0 | 0 | 0 |
| NM_080723 | 0 | 0 | 0 | 0 | 1 | 0 |
| NM_080725 | 1 | 1 | 1 | 1 | 0 | 1 |
| NM_080737 | 1 | 1 | 1 | 1 | 0 | 1 |
| NM_080738 | 1 | 1 | 1 | 0 | 1 | 0 |
| NM_080739 | 1 | 0 | 1 | 1 | 0 | 0 |
| NM_080740 | 1 | 0 | 1 | 1 | 0 | 1 |
| NM_080741 | 1 | 1 | 1 | 1 | 0 | 0 |
| NM_080742 | 0 | 0 | 0 | 0 | 0 | 1 |
| NM_080743 | 1 | 0 | 0 | 0 | 0 | 1 |
| NM_080744 | 1 | 0 | 1 | 0 | 0 | 0 |
| NM_080745 | 1 | 1 | 1 | 1 | 1 | 0 |
| NM_080746 | 1 | 1 | 1 | 1 | 0 | 0 |
| NM_080747 | 1 | 1 | 1 | 1 | 1 | 1 |
| NM_080748 | 1 | 1 | 1 | 0 | 0 | 0 |
| NM_080749 | 1 | 0 | 1 | 1 | 0 | 0 |
| NM_080750 | 1 | 1 | 1 | 1 | 0 | 0 |
| NM_080751 | 1 | 0 | 1 | 0 | 0 | 0 |
| NM_080752 | 1 | 0 | 1 | 1 | 0 | 1 |
| NM_080753 | 1 | 0 | 1 | 0 | 0 | 0 |
| NM_080758 | 1 | 0 | 1 | 0 | 0 | 1 |
| NM_080759 | 1 | 0 | 1 | 1 | 0 | 1 |
| NM_080764 | 1 | 0 | 1 | 1 | 0 | 0 |
| NM_080789 | 1 | 0 | 1 | 1 | 1 | 0 |
| NM_080792 | 1 | 1 | 1 | 1 | 1 | 1 |
| NM_080794 | 1 | 0 | 1 | 1 | 0 | 1 |
| NM_080796 | 1 | 1 | 1 | 1 | 0 | 1 |
| NM_080797 | 1 | 1 | 1 | 1 | 1 | 1 |
| NM_080817 | 1 | 1 | 1 | 1 | 0 | 0 |
| NM_080820 | 1 | 0 | 1 | 0 | 0 | 0 |
| NM_080821 | 1 | 0 | 1 | 1 | 1 | 1 |
| NM_080825 | 1 | 0 | 1 | 1 | 0 | 1 |
| NM_080831 | 1 | 0 | 1 | 1 | 0 | 1 |
| NM_080832 | 1 | 0 | 0 | 0 | 0 | 0 |
| NM_080833 | 1 | 0 | 1 | 1 | 0 | 0 |
| NM_080834 | 1 | 1 | 1 | 1 | 0 | 0 |
| NM_080836 | 1 | 0 | 1 | 0 | 0 | 0 |
| NM_080838 | 1 | 1 | 1 | 1 | 0 | 0 |
| NM_080839 | 1 | 0 | 1 | 1 | 0 | 0 |

|           |   |   |   |   |   |   |
|-----------|---|---|---|---|---|---|
| NM_080841 | 1 | 0 | 1 | 0 | 0 | 1 |
| NM_080842 | 1 | 0 | 1 | 0 | 0 | 0 |
| NM_080860 | 1 | 0 | 1 | 0 | 0 | 0 |
| NM_080861 | 1 | 0 | 1 | 0 | 1 | 1 |
| NM_080862 | 1 | 1 | 1 | 0 | 0 | 0 |
| NM_080863 | 1 | 1 | 1 | 1 | 0 | 0 |
| NM_080864 | 0 | 0 | 1 | 0 | 0 | 0 |
| NM_080865 | 1 | 1 | 1 | 1 | 0 | 0 |
| NM_080867 | 1 | 1 | 1 | 1 | 0 | 1 |
| NM_080868 | 1 | 0 | 0 | 0 | 0 | 1 |
| NM_080869 | 1 | 0 | 1 | 0 | 0 | 0 |
| NM_080871 | 1 | 1 | 1 | 0 | 0 | 0 |
| NM_080872 | 1 | 0 | 0 | 0 | 0 | 0 |
| NM_080873 | 0 | 0 | 1 | 0 | 0 | 0 |
| NM_080875 | 1 | 0 | 1 | 0 | 0 | 0 |
| NM_080876 | 1 | 0 | 1 | 0 | 0 | 1 |
| NM_080877 | 1 | 0 | 1 | 0 | 0 | 0 |
| NM_080878 | 1 | 1 | 1 | 1 | 0 | 0 |
| NM_080879 | 1 | 0 | 1 | 0 | 1 | 1 |
| NM_080881 | 1 | 0 | 1 | 0 | 1 | 1 |
| NM_080911 | 1 | 1 | 1 | 1 | 0 | 0 |
| NM_080913 | 1 | 1 | 1 | 1 | 0 | 0 |
| NM_080915 | 1 | 0 | 1 | 0 | 0 | 0 |
| NM_080920 | 1 | 0 | 1 | 0 | 0 | 1 |
| NM_080923 | 1 | 0 | 1 | 0 | 0 | 1 |
| NM_080924 | 1 | 0 | 1 | 0 | 0 | 0 |
| NM_080926 | 1 | 0 | 1 | 0 | 0 | 1 |
| NM_080927 | 1 | 1 | 1 | 1 | 0 | 0 |
| NM_100486 | 1 | 0 | 1 | 0 | 1 | 1 |
| NM_101395 | 1 | 1 | 1 | 1 | 0 | 1 |
| NM_130384 | 1 | 0 | 1 | 0 | 0 | 1 |
| NM_130385 | 1 | 1 | 1 | 1 | 0 | 0 |
| NM_130388 | 0 | 0 | 0 | 0 | 0 | 1 |
| NM_130389 | 1 | 1 | 1 | 0 | 0 | 0 |
| NM_130390 | 1 | 0 | 1 | 0 | 0 | 1 |
| NM_130391 | 1 | 0 | 1 | 1 | 0 | 0 |
| NM_130398 | 1 | 1 | 1 | 0 | 0 | 0 |
| NM_130435 | 1 | 1 | 1 | 1 | 0 | 1 |
| NM_130439 | 1 | 1 | 1 | 1 | 0 | 0 |
| NM_130440 | 1 | 0 | 1 | 0 | 0 | 0 |
| NM_130441 | 1 | 0 | 1 | 1 | 1 | 1 |
| NM_130442 | 1 | 0 | 1 | 0 | 0 | 0 |
| NM_130446 | 1 | 1 | 1 | 1 | 0 | 0 |
| NM_130459 | 1 | 0 | 1 | 1 | 0 | 0 |
| NM_130463 | 1 | 1 | 1 | 1 | 0 | 1 |
| NM_130466 | 1 | 1 | 1 | 1 | 0 | 0 |
| NM_130467 | 1 | 0 | 1 | 0 | 0 | 0 |
| NM_130468 | 1 | 0 | 1 | 1 | 0 | 0 |
| NM_130469 | 1 | 1 | 1 | 1 | 1 | 1 |
| NM_130759 | 1 | 1 | 1 | 1 | 0 | 1 |
| NM_130760 | 1 | 0 | 1 | 1 | 1 | 1 |
| NM_130761 | 1 | 0 | 1 | 0 | 0 | 0 |

|           |   |   |   |   |   |   |
|-----------|---|---|---|---|---|---|
| NM_130762 | 1 | 0 | 1 | 1 | 0 | 0 |
| NM_130767 | 1 | 0 | 1 | 0 | 0 | 0 |
| NM_130768 | 1 | 0 | 0 | 0 | 0 | 0 |
| NM_130769 | 1 | 0 | 1 | 0 | 0 | 0 |
| NM_130770 | 1 | 1 | 1 | 1 | 0 | 0 |
| NM_130771 | 1 | 0 | 1 | 1 | 1 | 1 |
| NM_130772 | 1 | 1 | 1 | 1 | 0 | 0 |
| NM_130775 | 0 | 1 | 0 | 1 | 0 | 0 |
| NM_130777 | 1 | 1 | 1 | 1 | 0 | 1 |
| NM_130778 | 1 | 1 | 1 | 1 | 0 | 1 |
| NM_130781 | 1 | 1 | 1 | 1 | 1 | 1 |
| NM_130782 | 1 | 1 | 1 | 1 | 0 | 1 |
| NM_130783 | 1 | 0 | 1 | 0 | 0 | 0 |
| NM_130784 | 1 | 0 | 1 | 0 | 0 | 1 |
| NM_130786 | 1 | 1 | 1 | 1 | 0 | 0 |
| NM_130787 | 1 | 0 | 1 | 0 | 0 | 0 |
| NM_130788 | 1 | 1 | 1 | 1 | 0 | 0 |
| NM_130791 | 1 | 0 | 1 | 0 | 0 | 0 |
| NM_130794 | 0 | 0 | 0 | 0 | 0 | 1 |
| NM_130797 | 1 | 0 | 1 | 0 | 0 | 0 |
| NM_130798 | 1 | 0 | 1 | 1 | 0 | 0 |
| NM_130803 | 1 | 1 | 1 | 1 | 0 | 1 |
| NM_130806 | 1 | 0 | 0 | 0 | 0 | 1 |
| NM_130807 | 1 | 1 | 1 | 1 | 0 | 0 |
| NM_130808 | 1 | 0 | 1 | 1 | 0 | 0 |
| NM_130809 | 1 | 0 | 1 | 0 | 0 | 0 |
| NM_130810 | 1 | 0 | 1 | 0 | 0 | 1 |
| NM_130811 | 1 | 0 | 1 | 1 | 0 | 0 |
| NM_130830 | 1 | 0 | 1 | 1 | 1 | 1 |
| NM_130835 | 1 | 0 | 1 | 1 | 0 | 0 |
| NM_130838 | 1 | 0 | 1 | 1 | 1 | 1 |
| NM_130843 | 1 | 0 | 1 | 1 | 0 | 1 |
| NM_130844 | 1 | 0 | 0 | 0 | 0 | 0 |
| NM_130845 | 1 | 1 | 1 | 1 | 0 | 1 |
| NM_130848 | 1 | 1 | 1 | 1 | 1 | 1 |
| NM_130849 | 1 | 0 | 1 | 0 | 0 | 0 |
| NM_130851 | 1 | 0 | 1 | 0 | 0 | 0 |
| NM_130852 | 0 | 0 | 0 | 0 | 0 | 1 |
| NM_130897 | 1 | 0 | 1 | 0 | 0 | 1 |
| NM_130898 | 1 | 0 | 1 | 1 | 1 | 1 |
| NM_130899 | 1 | 1 | 0 | 1 | 0 | 0 |
| NM_130900 | 1 | 0 | 1 | 0 | 0 | 0 |
| NM_130901 | 0 | 1 | 0 | 0 | 0 | 1 |
| NM_131915 | 1 | 1 | 1 | 1 | 0 | 1 |
| NM_131917 | 1 | 0 | 1 | 1 | 0 | 0 |
| NM_133168 | 1 | 1 | 1 | 1 | 0 | 0 |
| NM_133169 | 1 | 1 | 1 | 1 | 1 | 1 |
| NM_133170 | 0 | 0 | 0 | 0 | 0 | 1 |
| NM_133171 | 1 | 1 | 1 | 1 | 0 | 0 |
| NM_133177 | 1 | 0 | 1 | 0 | 0 | 0 |
| NM_133179 | 1 | 0 | 0 | 0 | 0 | 0 |
| NM_133259 | 1 | 0 | 1 | 1 | 0 | 0 |

|           |   |   |   |   |   |   |
|-----------|---|---|---|---|---|---|
| NM_133261 | 1 | 0 | 1 | 0 | 0 | 0 |
| NM_133263 | 1 | 1 | 1 | 1 | 0 | 1 |
| NM_133264 | 1 | 1 | 1 | 1 | 1 | 1 |
| NM_133265 | 1 | 1 | 1 | 1 | 0 | 0 |
| NM_133266 | 0 | 0 | 0 | 0 | 0 | 1 |
| NM_133267 | 1 | 0 | 0 | 0 | 0 | 0 |
| NM_133273 | 1 | 0 | 1 | 1 | 0 | 0 |
| NM_133279 | 1 | 0 | 1 | 0 | 0 | 0 |
| NM_133280 | 1 | 1 | 1 | 0 | 0 | 0 |
| NM_133282 | 1 | 0 | 1 | 0 | 0 | 0 |
| NM_133325 | 1 | 0 | 1 | 1 | 1 | 1 |
| NM_133327 | 1 | 0 | 0 | 0 | 0 | 0 |
| NM_133328 | 1 | 1 | 1 | 1 | 0 | 0 |
| NM_133330 | 1 | 0 | 1 | 1 | 0 | 1 |
| NM_133334 | 1 | 0 | 1 | 0 | 0 | 0 |
| NM_133336 | 1 | 1 | 1 | 1 | 0 | 0 |
| NM_133367 | 1 | 0 | 1 | 0 | 1 | 1 |
| NM_133370 | 1 | 1 | 1 | 0 | 1 | 1 |
| NM_133371 | 1 | 0 | 1 | 0 | 0 | 0 |
| NM_133373 | 1 | 0 | 0 | 0 | 0 | 0 |
| NM_133375 | 1 | 0 | 1 | 1 | 1 | 1 |
| NM_133376 | 1 | 1 | 1 | 1 | 0 | 0 |
| NM_133377 | 1 | 0 | 1 | 0 | 0 | 0 |
| NM_133378 | 1 | 1 | 1 | 1 | 0 | 0 |
| NM_133379 | 1 | 1 | 1 | 1 | 0 | 0 |
| NM_133430 | 1 | 0 | 1 | 1 | 0 | 0 |
| NM_133433 | 1 | 1 | 1 | 1 | 1 | 0 |
| NM_133436 | 1 | 1 | 1 | 1 | 1 | 1 |
| NM_133439 | 1 | 0 | 1 | 0 | 0 | 0 |
| NM_133443 | 1 | 0 | 1 | 0 | 1 | 1 |
| NM_133445 | 1 | 1 | 1 | 1 | 1 | 1 |
| NM_133446 | 1 | 0 | 1 | 0 | 1 | 1 |
| NM_133452 | 1 | 1 | 1 | 1 | 0 | 0 |
| NM_133455 | 1 | 0 | 1 | 1 | 0 | 0 |
| NM_133456 | 1 | 1 | 1 | 1 | 1 | 1 |
| NM_133457 | 1 | 1 | 1 | 1 | 0 | 1 |
| NM_133462 | 1 | 0 | 1 | 1 | 1 | 1 |
| NM_133466 | 1 | 0 | 1 | 0 | 0 | 0 |
| NM_133467 | 0 | 0 | 1 | 0 | 0 | 1 |
| NM_133473 | 1 | 1 | 1 | 1 | 0 | 0 |
| NM_133476 | 1 | 0 | 1 | 0 | 0 | 1 |
| NM_133480 | 1 | 0 | 1 | 0 | 0 | 1 |
| NM_133483 | 1 | 0 | 1 | 0 | 0 | 1 |
| NM_133484 | 1 | 1 | 1 | 1 | 0 | 1 |
| NM_133486 | 1 | 0 | 1 | 0 | 0 | 1 |
| NM_133489 | 1 | 1 | 1 | 0 | 0 | 0 |
| NM_133491 | 1 | 1 | 1 | 1 | 0 | 0 |
| NM_133492 | 1 | 1 | 1 | 0 | 0 | 0 |
| NM_133493 | 0 | 0 | 1 | 0 | 0 | 0 |
| NM_133494 | 1 | 0 | 1 | 1 | 0 | 0 |
| NM_133496 | 1 | 0 | 1 | 1 | 0 | 0 |
| NM_133497 | 0 | 1 | 0 | 1 | 0 | 1 |

|           |   |   |   |   |   |   |
|-----------|---|---|---|---|---|---|
| NM_133498 | 1 | 0 | 1 | 0 | 0 | 0 |
| NM_133499 | 1 | 0 | 1 | 0 | 1 | 0 |
| NM_133503 | 1 | 0 | 1 | 0 | 0 | 0 |
| NM_133509 | 1 | 0 | 1 | 0 | 0 | 0 |
| NM_133510 | 1 | 1 | 1 | 1 | 1 | 1 |
| NM_133625 | 1 | 0 | 0 | 0 | 0 | 0 |
| NM_133629 | 1 | 0 | 1 | 1 | 0 | 1 |
| NM_133631 | 1 | 0 | 1 | 1 | 0 | 0 |
| NM_133635 | 1 | 0 | 1 | 0 | 0 | 0 |
| NM_133636 | 1 | 0 | 1 | 1 | 0 | 0 |
| NM_133637 | 1 | 1 | 1 | 1 | 0 | 0 |
| NM_133638 | 1 | 0 | 1 | 0 | 0 | 0 |
| NM_133645 | 1 | 0 | 1 | 0 | 0 | 1 |
| NM_133646 | 1 | 0 | 1 | 0 | 0 | 0 |
| NM_134258 | 1 | 0 | 1 | 1 | 0 | 0 |
| NM_134261 | 1 | 0 | 1 | 1 | 0 | 0 |
| NM_134264 | 1 | 0 | 1 | 1 | 0 | 0 |
| NM_134268 | 1 | 1 | 1 | 1 | 1 | 1 |
| NM_134421 | 1 | 1 | 1 | 1 | 0 | 1 |
| NM_134423 | 1 | 0 | 1 | 0 | 0 | 0 |
| NM_134425 | 1 | 1 | 0 | 0 | 0 | 0 |
| NM_134428 | 1 | 1 | 1 | 1 | 0 | 0 |
| NM_134433 | 1 | 1 | 1 | 1 | 0 | 0 |
| NM_134434 | 1 | 1 | 1 | 1 | 0 | 1 |
| NM_134440 | 1 | 0 | 1 | 0 | 0 | 0 |
| NM_134441 | 1 | 1 | 1 | 0 | 0 | 1 |
| NM_134442 | 1 | 1 | 1 | 1 | 0 | 0 |
| NM_134444 | 1 | 1 | 1 | 0 | 0 | 1 |
| NM_134470 | 1 | 1 | 1 | 1 | 0 | 0 |
| NM_138270 | 1 | 0 | 1 | 0 | 0 | 0 |
| NM_138276 | 1 | 0 | 1 | 0 | 0 | 0 |
| NM_138277 | 1 | 0 | 1 | 1 | 0 | 0 |
| NM_138278 | 1 | 0 | 1 | 0 | 1 | 1 |
| NM_138279 | 1 | 1 | 1 | 1 | 0 | 0 |
| NM_138280 | 1 | 0 | 1 | 0 | 0 | 0 |
| NM_138283 | 0 | 0 | 0 | 0 | 0 | 1 |
| NM_138284 | 1 | 0 | 1 | 1 | 0 | 1 |
| NM_138285 | 1 | 0 | 1 | 1 | 1 | 1 |
| NM_138286 | 1 | 0 | 1 | 0 | 0 | 1 |
| NM_138287 | 1 | 0 | 1 | 0 | 0 | 1 |
| NM_138288 | 1 | 1 | 1 | 1 | 0 | 0 |
| NM_138290 | 1 | 0 | 1 | 1 | 1 | 1 |
| NM_138291 | 1 | 0 | 1 | 0 | 0 | 0 |
| NM_138292 | 1 | 0 | 1 | 0 | 0 | 0 |
| NM_138293 | 1 | 0 | 1 | 0 | 0 | 0 |
| NM_138296 | 1 | 0 | 1 | 0 | 0 | 0 |
| NM_138299 | 1 | 0 | 1 | 0 | 0 | 0 |
| NM_138300 | 1 | 0 | 1 | 1 | 0 | 1 |
| NM_138316 | 1 | 0 | 1 | 0 | 1 | 0 |
| NM_138318 | 1 | 1 | 1 | 1 | 0 | 0 |
| NM_138320 | 0 | 0 | 0 | 0 | 0 | 1 |
| NM_138322 | 0 | 0 | 1 | 0 | 0 | 0 |

|           |   |   |   |   |   |   |
|-----------|---|---|---|---|---|---|
| NM_138323 | 1 | 0 | 1 | 1 | 0 | 0 |
| NM_138325 | 1 | 0 | 1 | 0 | 0 | 0 |
| NM_138326 | 1 | 0 | 0 | 0 | 0 | 0 |
| NM_138328 | 1 | 0 | 1 | 0 | 0 | 0 |
| NM_138329 | 1 | 0 | 1 | 0 | 0 | 0 |
| NM_138330 | 1 | 0 | 1 | 1 | 0 | 0 |
| NM_138331 | 1 | 1 | 1 | 1 | 0 | 0 |
| NM_138332 | 1 | 1 | 1 | 1 | 0 | 0 |
| NM_138333 | 1 | 1 | 1 | 1 | 1 | 1 |
| NM_138334 | 1 | 0 | 1 | 0 | 0 | 0 |
| NM_138335 | 1 | 0 | 1 | 1 | 0 | 0 |
| NM_138336 | 1 | 0 | 1 | 0 | 0 | 0 |
| NM_138337 | 1 | 1 | 1 | 0 | 0 | 0 |
| NM_138338 | 1 | 1 | 0 | 1 | 0 | 1 |
| NM_138339 | 1 | 0 | 1 | 0 | 0 | 0 |
| NM_138340 | 1 | 1 | 1 | 1 | 0 | 0 |
| NM_138341 | 1 | 1 | 1 | 1 | 0 | 0 |
| NM_138342 | 1 | 1 | 1 | 1 | 0 | 0 |
| NM_138343 | 1 | 0 | 1 | 0 | 1 | 1 |
| NM_138344 | 1 | 0 | 1 | 0 | 0 | 0 |
| NM_138346 | 1 | 0 | 1 | 1 | 1 | 0 |
| NM_138347 | 1 | 0 | 1 | 1 | 1 | 1 |
| NM_138348 | 1 | 0 | 1 | 0 | 0 | 1 |
| NM_138349 | 1 | 0 | 1 | 1 | 0 | 0 |
| NM_138350 | 1 | 0 | 1 | 0 | 0 | 0 |
| NM_138351 | 1 | 1 | 1 | 1 | 0 | 0 |
| NM_138353 | 0 | 0 | 1 | 0 | 0 | 0 |
| NM_138355 | 1 | 1 | 1 | 1 | 1 | 1 |
| NM_138357 | 1 | 1 | 1 | 0 | 1 | 1 |
| NM_138358 | 1 | 0 | 1 | 0 | 0 | 0 |
| NM_138360 | 1 | 0 | 1 | 0 | 0 | 0 |
| NM_138361 | 1 | 0 | 1 | 0 | 0 | 0 |
| NM_138363 | 1 | 0 | 1 | 1 | 1 | 1 |
| NM_138364 | 1 | 0 | 1 | 1 | 0 | 0 |
| NM_138368 | 1 | 0 | 1 | 1 | 0 | 0 |
| NM_138371 | 1 | 1 | 1 | 1 | 0 | 1 |
| NM_138372 | 1 | 1 | 0 | 0 | 0 | 0 |
| NM_138373 | 1 | 0 | 1 | 0 | 0 | 0 |
| NM_138375 | 1 | 1 | 1 | 0 | 0 | 1 |
| NM_138376 | 1 | 0 | 1 | 1 | 0 | 0 |
| NM_138379 | 1 | 0 | 1 | 0 | 0 | 1 |
| NM_138381 | 1 | 1 | 1 | 1 | 1 | 1 |
| NM_138384 | 1 | 0 | 1 | 0 | 0 | 1 |
| NM_138385 | 1 | 1 | 1 | 1 | 0 | 1 |
| NM_138386 | 1 | 1 | 1 | 1 | 0 | 0 |
| NM_138387 | 1 | 1 | 1 | 1 | 0 | 0 |
| NM_138389 | 1 | 1 | 1 | 1 | 0 | 0 |
| NM_138390 | 1 | 0 | 1 | 0 | 0 | 0 |
| NM_138391 | 1 | 0 | 1 | 0 | 0 | 0 |
| NM_138392 | 1 | 0 | 1 | 1 | 0 | 0 |
| NM_138393 | 1 | 0 | 1 | 0 | 0 | 1 |
| NM_138394 | 1 | 1 | 1 | 1 | 1 | 1 |



|           |   |   |   |   |   |   |
|-----------|---|---|---|---|---|---|
| NM_138395 | 1 | 0 | 1 | 1 | 0 | 1 |
| NM_138396 | 1 | 1 | 1 | 1 | 0 | 0 |
| NM_138397 | 1 | 1 | 1 | 1 | 0 | 0 |
| NM_138399 | 1 | 1 | 1 | 1 | 0 | 0 |
| NM_138401 | 1 | 0 | 1 | 0 | 0 | 0 |
| NM_138402 | 1 | 1 | 1 | 1 | 0 | 1 |
| NM_138403 | 1 | 1 | 1 | 1 | 0 | 0 |
| NM_138408 | 1 | 0 | 1 | 0 | 0 | 0 |
| NM_138409 | 1 | 0 | 1 | 0 | 0 | 0 |
| NM_138410 | 1 | 1 | 1 | 1 | 0 | 0 |
| NM_138412 | 1 | 0 | 1 | 1 | 1 | 1 |
| NM_138414 | 1 | 1 | 1 | 1 | 0 | 1 |
| NM_138415 | 0 | 0 | 0 | 0 | 0 | 1 |
| NM_138417 | 1 | 0 | 1 | 1 | 0 | 1 |
| NM_138418 | 1 | 0 | 1 | 1 | 1 | 0 |
| NM_138419 | 1 | 0 | 1 | 0 | 0 | 1 |
| NM_138421 | 1 | 0 | 1 | 1 | 1 | 1 |
| NM_138422 | 1 | 1 | 1 | 1 | 1 | 1 |
| NM_138423 | 1 | 0 | 1 | 0 | 0 | 0 |
| NM_138424 | 1 | 0 | 1 | 0 | 0 | 0 |
| NM_138425 | 1 | 1 | 1 | 1 | 1 | 1 |
| NM_138429 | 1 | 0 | 1 | 0 | 0 | 0 |
| NM_138430 | 1 | 1 | 1 | 1 | 0 | 0 |
| NM_138431 | 1 | 0 | 1 | 0 | 0 | 1 |
| NM_138432 | 1 | 1 | 1 | 1 | 0 | 0 |
| NM_138433 | 1 | 0 | 1 | 0 | 0 | 0 |
| NM_138434 | 1 | 1 | 1 | 1 | 0 | 1 |
| NM_138435 | 1 | 1 | 1 | 0 | 0 | 0 |
| NM_138436 | 1 | 0 | 1 | 1 | 0 | 0 |
| NM_138437 | 1 | 1 | 1 | 1 | 1 | 1 |
| NM_138441 | 1 | 0 | 1 | 1 | 0 | 0 |
| NM_138442 | 1 | 0 | 1 | 0 | 0 | 0 |
| NM_138443 | 1 | 0 | 1 | 0 | 0 | 0 |
| NM_138444 | 1 | 1 | 1 | 1 | 0 | 0 |
| NM_138445 | 1 | 1 | 1 | 1 | 0 | 1 |
| NM_138446 | 1 | 0 | 1 | 1 | 0 | 1 |
| NM_138448 | 1 | 0 | 1 | 0 | 0 | 1 |
| NM_138450 | 1 | 1 | 1 | 1 | 1 | 1 |
| NM_138451 | 1 | 1 | 1 | 0 | 0 | 1 |
| NM_138452 | 1 | 1 | 1 | 1 | 0 | 1 |
| NM_138453 | 0 | 0 | 1 | 0 | 0 | 0 |
| NM_138454 | 1 | 0 | 1 | 0 | 0 | 0 |
| NM_138456 | 1 | 1 | 1 | 1 | 1 | 1 |
| NM_138457 | 1 | 0 | 1 | 0 | 0 | 0 |
| NM_138458 | 1 | 0 | 1 | 0 | 0 | 0 |
| NM_138459 | 1 | 1 | 1 | 1 | 0 | 1 |
| NM_138460 | 1 | 0 | 1 | 1 | 0 | 1 |
| NM_138461 | 1 | 1 | 1 | 1 | 0 | 1 |
| NM_138462 | 1 | 1 | 1 | 1 | 0 | 1 |
| NM_138463 | 1 | 0 | 1 | 0 | 0 | 0 |
| NM_138465 | 1 | 0 | 1 | 1 | 1 | 0 |
| NM_138468 | 1 | 0 | 1 | 0 | 0 | 0 |

|           |   |   |   |   |   |   |
|-----------|---|---|---|---|---|---|
| NM_138470 | 1 | 1 | 1 | 1 | 0 | 0 |
| NM_138473 | 1 | 1 | 1 | 1 | 0 | 1 |
| NM_138474 | 1 | 0 | 1 | 0 | 0 | 1 |
| NM_138476 | 1 | 0 | 1 | 0 | 0 | 1 |
| NM_138477 | 1 | 0 | 1 | 0 | 0 | 0 |
| NM_138478 | 1 | 1 | 1 | 1 | 0 | 0 |
| NM_138480 | 1 | 0 | 1 | 0 | 0 | 0 |
| NM_138482 | 1 | 1 | 1 | 1 | 0 | 1 |
| NM_138483 | 0 | 1 | 0 | 1 | 0 | 0 |
| NM_138484 | 0 | 0 | 1 | 0 | 0 | 0 |
| NM_138487 | 1 | 1 | 1 | 1 | 0 | 1 |
| NM_138491 | 1 | 0 | 1 | 0 | 1 | 1 |
| NM_138492 | 1 | 1 | 1 | 1 | 0 | 0 |
| NM_138494 | 1 | 0 | 1 | 0 | 0 | 0 |
| NM_138497 | 0 | 0 | 0 | 0 | 0 | 1 |
| NM_138501 | 1 | 0 | 1 | 0 | 0 | 0 |
| NM_138554 | 1 | 1 | 1 | 1 | 1 | 1 |
| NM_138557 | 1 | 1 | 1 | 1 | 1 | 1 |
| NM_138565 | 1 | 1 | 1 | 1 | 0 | 0 |
| NM_138566 | 1 | 0 | 1 | 1 | 0 | 0 |
| NM_138567 | 1 | 0 | 1 | 0 | 0 | 0 |
| NM_138570 | 1 | 0 | 1 | 0 | 0 | 0 |
| NM_138571 | 1 | 1 | 1 | 1 | 1 | 1 |
| NM_138572 | 1 | 1 | 1 | 1 | 0 | 1 |
| NM_138574 | 1 | 0 | 1 | 0 | 1 | 1 |
| NM_138575 | 0 | 0 | 0 | 0 | 0 | 1 |
| NM_138576 | 1 | 0 | 1 | 0 | 0 | 0 |
| NM_138610 | 1 | 0 | 1 | 0 | 0 | 0 |
| NM_138611 | 1 | 0 | 1 | 0 | 1 | 0 |
| NM_138612 | 0 | 0 | 0 | 1 | 0 | 0 |
| NM_138617 | 1 | 1 | 1 | 0 | 1 | 0 |
| NM_138619 | 1 | 0 | 1 | 0 | 0 | 1 |
| NM_138625 | 1 | 0 | 1 | 0 | 0 | 0 |
| NM_138632 | 1 | 1 | 1 | 1 | 1 | 0 |
| NM_138633 | 1 | 1 | 1 | 1 | 0 | 0 |
| NM_138634 | 1 | 0 | 1 | 0 | 0 | 0 |
| NM_138635 | 1 | 0 | 1 | 0 | 0 | 0 |
| NM_138639 | 1 | 0 | 1 | 0 | 1 | 1 |
| NM_138687 | 1 | 0 | 1 | 0 | 0 | 0 |
| NM_138689 | 1 | 1 | 1 | 1 | 0 | 1 |
| NM_138691 | 1 | 0 | 1 | 0 | 0 | 0 |
| NM_138693 | 1 | 0 | 0 | 0 | 0 | 0 |
| NM_138694 | 0 | 1 | 0 | 0 | 0 | 1 |
| NM_138697 | 1 | 1 | 1 | 1 | 0 | 0 |
| NM_138698 | 1 | 0 | 1 | 0 | 1 | 0 |
| NM_138699 | 1 | 0 | 1 | 1 | 1 | 1 |
| NM_138700 | 1 | 1 | 0 | 0 | 0 | 1 |
| NM_138701 | 1 | 1 | 1 | 1 | 1 | 1 |
| NM_138703 | 0 | 0 | 0 | 1 | 0 | 0 |
| NM_138704 | 1 | 0 | 1 | 1 | 0 | 0 |
| NM_138705 | 1 | 0 | 1 | 0 | 0 | 0 |
| NM_138706 | 1 | 0 | 1 | 0 | 0 | 0 |

|           |   |   |   |   |   |   |
|-----------|---|---|---|---|---|---|
| NM_138714 | 1 | 0 | 1 | 1 | 0 | 0 |
| NM_138715 | 1 | 1 | 1 | 1 | 0 | 1 |
| NM_138717 | 1 | 1 | 1 | 1 | 0 | 0 |
| NM_138720 | 1 | 1 | 1 | 1 | 0 | 0 |
| NM_138722 | 1 | 0 | 1 | 0 | 0 | 0 |
| NM_138726 | 1 | 0 | 1 | 0 | 0 | 1 |
| NM_138729 | 1 | 0 | 1 | 0 | 0 | 0 |
| NM_138732 | 1 | 0 | 1 | 1 | 0 | 1 |
| NM_138733 | 1 | 1 | 1 | 0 | 0 | 0 |
| NM_138737 | 1 | 0 | 1 | 0 | 0 | 0 |
| NM_138738 | 1 | 0 | 1 | 0 | 0 | 0 |
| NM_138762 | 1 | 0 | 0 | 0 | 0 | 1 |
| NM_138763 | 1 | 0 | 1 | 0 | 0 | 0 |
| NM_138768 | 1 | 0 | 1 | 0 | 0 | 0 |
| NM_138769 | 1 | 1 | 1 | 1 | 1 | 1 |
| NM_138770 | 1 | 0 | 1 | 0 | 0 | 0 |
| NM_138771 | 1 | 1 | 1 | 1 | 0 | 1 |
| NM_138773 | 1 | 0 | 1 | 1 | 0 | 0 |
| NM_138774 | 1 | 1 | 1 | 1 | 0 | 1 |
| NM_138775 | 1 | 0 | 1 | 0 | 0 | 1 |
| NM_138777 | 1 | 1 | 1 | 0 | 0 | 0 |
| NM_138778 | 1 | 1 | 1 | 1 | 1 | 1 |
| NM_138779 | 1 | 1 | 1 | 1 | 0 | 1 |
| NM_138783 | 1 | 0 | 1 | 0 | 0 | 0 |
| NM_138785 | 1 | 0 | 1 | 0 | 0 | 0 |
| NM_138786 | 1 | 0 | 1 | 0 | 0 | 0 |
| NM_138787 | 1 | 1 | 1 | 1 | 0 | 0 |
| NM_138788 | 1 | 0 | 1 | 0 | 1 | 1 |
| NM_138789 | 0 | 0 | 1 | 0 | 0 | 0 |
| NM_138790 | 1 | 0 | 1 | 0 | 0 | 0 |
| NM_138791 | 1 | 0 | 1 | 0 | 0 | 0 |
| NM_138792 | 1 | 0 | 1 | 1 | 0 | 0 |
| NM_138793 | 1 | 1 | 1 | 1 | 1 | 1 |
| NM_138794 | 1 | 1 | 1 | 1 | 0 | 0 |
| NM_138795 | 1 | 1 | 1 | 0 | 0 | 1 |
| NM_138796 | 0 | 0 | 1 | 0 | 0 | 0 |
| NM_138797 | 1 | 0 | 1 | 0 | 0 | 0 |
| NM_138798 | 1 | 0 | 1 | 1 | 0 | 1 |
| NM_138799 | 1 | 0 | 1 | 0 | 1 | 1 |
| NM_138800 | 1 | 1 | 0 | 0 | 0 | 1 |
| NM_138801 | 1 | 1 | 1 | 0 | 1 | 1 |
| NM_138802 | 1 | 0 | 1 | 0 | 0 | 1 |
| NM_138803 | 1 | 1 | 1 | 1 | 0 | 0 |
| NM_138804 | 1 | 0 | 1 | 1 | 0 | 0 |
| NM_138805 | 1 | 1 | 1 | 1 | 0 | 0 |
| NM_138806 | 1 | 0 | 1 | 0 | 0 | 0 |
| NM_138807 | 1 | 0 | 1 | 1 | 0 | 0 |
| NM_138808 | 1 | 0 | 1 | 0 | 0 | 0 |
| NM_138809 | 1 | 0 | 1 | 0 | 1 | 0 |
| NM_138810 | 1 | 0 | 1 | 0 | 1 | 1 |
| NM_138811 | 1 | 0 | 1 | 1 | 1 | 1 |
| NM_138814 | 1 | 0 | 0 | 0 | 0 | 0 |

|           |   |   |   |   |   |   |
|-----------|---|---|---|---|---|---|
| NM_138815 | 0 | 0 | 1 | 0 | 0 | 0 |
| NM_138816 | 1 | 0 | 1 | 0 | 0 | 1 |
| NM_138817 | 1 | 1 | 1 | 1 | 0 | 0 |
| NM_138818 | 1 | 1 | 1 | 1 | 0 | 0 |
| NM_138819 | 1 | 0 | 1 | 0 | 0 | 0 |
| NM_138820 | 1 | 1 | 1 | 1 | 0 | 1 |
| NM_138821 | 1 | 0 | 1 | 0 | 0 | 1 |
| NM_138924 | 1 | 1 | 1 | 0 | 0 | 1 |
| NM_138925 | 1 | 0 | 1 | 0 | 1 | 1 |
| NM_138931 | 1 | 1 | 1 | 1 | 0 | 0 |
| NM_138932 | 1 | 0 | 1 | 0 | 0 | 1 |
| NM_138934 | 1 | 0 | 1 | 1 | 0 | 0 |
| NM_138957 | 1 | 1 | 1 | 1 | 0 | 0 |
| NM_138958 | 1 | 1 | 1 | 1 | 0 | 1 |
| NM_138959 | 1 | 0 | 1 | 0 | 0 | 0 |
| NM_138960 | 1 | 0 | 1 | 0 | 0 | 0 |
| NM_138961 | 1 | 0 | 1 | 0 | 0 | 1 |
| NM_138962 | 1 | 1 | 1 | 0 | 1 | 1 |
| NM_138963 | 1 | 0 | 1 | 1 | 0 | 0 |
| NM_138964 | 1 | 1 | 1 | 0 | 0 | 1 |
| NM_138966 | 1 | 0 | 1 | 0 | 0 | 1 |
| NM_138967 | 1 | 1 | 1 | 1 | 1 | 1 |
| NM_138968 | 1 | 1 | 1 | 0 | 0 | 1 |
| NM_138969 | 0 | 0 | 1 | 0 | 0 | 0 |
| NM_138972 | 1 | 0 | 1 | 1 | 0 | 1 |
| NM_138980 | 1 | 0 | 1 | 0 | 0 | 0 |
| NM_138991 | 1 | 1 | 1 | 1 | 0 | 0 |
| NM_138993 | 1 | 1 | 1 | 1 | 0 | 1 |
| NM_138994 | 0 | 0 | 0 | 0 | 0 | 1 |
| NM_138995 | 1 | 0 | 1 | 0 | 0 | 1 |
| NM_138996 | 1 | 0 | 0 | 0 | 0 | 0 |
| NM_139002 | 1 | 1 | 1 | 0 | 0 | 0 |
| NM_139003 | 1 | 0 | 0 | 0 | 0 | 1 |
| NM_139004 | 1 | 0 | 1 | 0 | 0 | 0 |
| NM_139005 | 1 | 0 | 1 | 0 | 0 | 0 |
| NM_139013 | 1 | 0 | 1 | 1 | 1 | 1 |
| NM_139015 | 1 | 1 | 1 | 1 | 1 | 0 |
| NM_139016 | 1 | 0 | 1 | 1 | 1 | 1 |
| NM_139018 | 1 | 1 | 1 | 1 | 0 | 0 |
| NM_139021 | 1 | 0 | 1 | 1 | 0 | 0 |
| NM_139022 | 1 | 0 | 1 | 0 | 0 | 0 |
| NM_139023 | 1 | 0 | 1 | 0 | 0 | 0 |
| NM_139024 | 1 | 0 | 1 | 0 | 0 | 0 |
| NM_139025 | 1 | 0 | 1 | 1 | 0 | 0 |
| NM_139028 | 1 | 0 | 1 | 0 | 0 | 1 |
| NM_139032 | 0 | 0 | 1 | 0 | 0 | 0 |
| NM_139035 | 1 | 0 | 0 | 0 | 0 | 0 |
| NM_139045 | 1 | 0 | 1 | 1 | 1 | 0 |
| NM_139047 | 1 | 0 | 1 | 0 | 0 | 1 |
| NM_139048 | 1 | 0 | 1 | 1 | 1 | 1 |
| NM_139052 | 1 | 0 | 1 | 0 | 0 | 1 |
| NM_139054 | 1 | 0 | 1 | 0 | 0 | 0 |

|           |   |   |   |   |   |   |
|-----------|---|---|---|---|---|---|
| NM_139055 | 1 | 0 | 1 | 0 | 0 | 0 |
| NM_139057 | 1 | 0 | 0 | 0 | 0 | 0 |
| NM_139058 | 1 | 0 | 1 | 0 | 0 | 0 |
| NM_139067 | 1 | 0 | 1 | 1 | 0 | 0 |
| NM_139072 | 1 | 0 | 1 | 0 | 0 | 1 |
| NM_139073 | 1 | 0 | 0 | 0 | 0 | 0 |
| NM_139074 | 1 | 0 | 1 | 1 | 0 | 0 |
| NM_139075 | 1 | 1 | 1 | 1 | 0 | 1 |
| NM_139076 | 1 | 0 | 1 | 1 | 0 | 0 |
| NM_139078 | 1 | 0 | 1 | 1 | 0 | 0 |
| NM_139120 | 1 | 0 | 1 | 0 | 0 | 0 |
| NM_139124 | 1 | 1 | 1 | 0 | 0 | 1 |
| NM_139125 | 1 | 1 | 1 | 1 | 0 | 0 |
| NM_139126 | 1 | 0 | 1 | 0 | 0 | 0 |
| NM_139127 | 1 | 1 | 1 | 1 | 0 | 0 |
| NM_139131 | 1 | 1 | 1 | 1 | 0 | 0 |
| NM_139137 | 0 | 0 | 0 | 0 | 0 | 1 |
| NM_139155 | 1 | 0 | 1 | 0 | 0 | 0 |
| NM_139158 | 0 | 0 | 0 | 0 | 0 | 1 |
| NM_139159 | 1 | 1 | 1 | 1 | 0 | 0 |
| NM_139160 | 1 | 0 | 1 | 1 | 1 | 0 |
| NM_139161 | 1 | 1 | 1 | 0 | 0 | 1 |
| NM_139163 | 0 | 0 | 1 | 0 | 0 | 0 |
| NM_139164 | 1 | 1 | 1 | 1 | 0 | 0 |
| NM_139165 | 1 | 1 | 1 | 1 | 0 | 0 |
| NM_139166 | 1 | 0 | 1 | 0 | 0 | 0 |
| NM_139168 | 1 | 0 | 1 | 0 | 0 | 0 |
| NM_139169 | 1 | 0 | 1 | 1 | 0 | 0 |
| NM_139170 | 1 | 0 | 1 | 0 | 0 | 1 |
| NM_139172 | 1 | 0 | 0 | 0 | 0 | 1 |
| NM_139173 | 0 | 0 | 1 | 0 | 0 | 0 |
| NM_139174 | 1 | 0 | 1 | 0 | 1 | 1 |
| NM_139176 | 1 | 1 | 1 | 1 | 1 | 0 |
| NM_139177 | 1 | 1 | 1 | 1 | 0 | 1 |
| NM_139178 | 1 | 1 | 1 | 1 | 1 | 1 |
| NM_139179 | 1 | 1 | 1 | 1 | 0 | 0 |
| NM_139201 | 1 | 0 | 1 | 1 | 1 | 1 |
| NM_139202 | 1 | 0 | 1 | 1 | 0 | 0 |
| NM_139205 | 1 | 1 | 1 | 1 | 0 | 1 |
| NM_139207 | 1 | 0 | 1 | 0 | 1 | 1 |
| NM_139208 | 1 | 0 | 1 | 0 | 0 | 0 |
| NM_139214 | 1 | 0 | 1 | 0 | 0 | 0 |
| NM_139215 | 1 | 0 | 0 | 0 | 0 | 0 |
| NM_139235 | 1 | 1 | 1 | 1 | 0 | 1 |
| NM_139238 | 1 | 0 | 1 | 0 | 1 | 1 |
| NM_139240 | 1 | 0 | 1 | 0 | 0 | 1 |
| NM_139241 | 1 | 0 | 1 | 0 | 1 | 1 |
| NM_139242 | 1 | 0 | 1 | 1 | 1 | 1 |
| NM_139243 | 1 | 0 | 1 | 0 | 0 | 0 |
| NM_139244 | 1 | 0 | 1 | 0 | 1 | 1 |
| NM_139245 | 1 | 0 | 1 | 1 | 0 | 0 |
| NM_139246 | 1 | 0 | 1 | 0 | 0 | 0 |

|           |   |   |   |   |   |   |
|-----------|---|---|---|---|---|---|
| NM_139247 | 1 | 0 | 1 | 1 | 0 | 0 |
| NM_139248 | 1 | 0 | 1 | 1 | 0 | 0 |
| NM_139249 | 1 | 0 | 1 | 1 | 0 | 1 |
| NM_139250 | 1 | 0 | 1 | 0 | 0 | 1 |
| NM_139265 | 1 | 0 | 1 | 1 | 1 | 1 |
| NM_139266 | 1 | 1 | 1 | 1 | 0 | 1 |
| NM_139273 | 1 | 0 | 1 | 0 | 0 | 1 |
| NM_139274 | 1 | 0 | 1 | 0 | 0 | 0 |
| NM_139275 | 1 | 1 | 1 | 1 | 0 | 1 |
| NM_139276 | 1 | 1 | 1 | 1 | 1 | 1 |
| NM_139278 | 1 | 0 | 1 | 0 | 0 | 0 |
| NM_139279 | 1 | 0 | 1 | 1 | 0 | 0 |
| NM_139280 | 1 | 1 | 1 | 1 | 0 | 1 |
| NM_139281 | 1 | 1 | 1 | 1 | 0 | 1 |
| NM_139282 | 1 | 0 | 1 | 0 | 0 | 0 |
| NM_139283 | 1 | 0 | 1 | 0 | 0 | 0 |
| NM_139284 | 1 | 0 | 0 | 0 | 0 | 0 |
| NM_139285 | 1 | 0 | 1 | 1 | 0 | 0 |
| NM_139286 | 1 | 0 | 1 | 1 | 1 | 1 |
| NM_139289 | 0 | 0 | 1 | 0 | 1 | 0 |
| NM_139290 | 1 | 1 | 1 | 1 | 0 | 1 |
| NM_139313 | 1 | 0 | 1 | 1 | 0 | 1 |
| NM_139318 | 1 | 0 | 1 | 0 | 0 | 1 |
| NM_139319 | 0 | 0 | 0 | 0 | 0 | 1 |
| NM_139321 | 1 | 1 | 1 | 1 | 1 | 1 |
| NM_139322 | 1 | 1 | 1 | 1 | 1 | 1 |
| NM_139323 | 1 | 0 | 1 | 1 | 0 | 0 |
| NM_139346 | 1 | 0 | 1 | 1 | 1 | 1 |
| NM_139347 | 1 | 0 | 1 | 0 | 0 | 0 |
| NM_139352 | 1 | 0 | 1 | 1 | 0 | 0 |
| NM_139354 | 1 | 0 | 1 | 1 | 0 | 0 |
| NM_144490 | 1 | 0 | 1 | 0 | 1 | 1 |
| NM_144492 | 1 | 0 | 1 | 0 | 0 | 1 |
| NM_144499 | 1 | 1 | 1 | 0 | 0 | 0 |
| NM_144501 | 1 | 1 | 1 | 1 | 1 | 1 |
| NM_144507 | 1 | 0 | 1 | 0 | 0 | 0 |
| NM_144508 | 1 | 0 | 1 | 0 | 0 | 0 |
| NM_144563 | 1 | 1 | 1 | 1 | 0 | 0 |
| NM_144564 | 1 | 0 | 1 | 0 | 0 | 0 |
| NM_144565 | 1 | 1 | 1 | 1 | 0 | 0 |
| NM_144567 | 1 | 1 | 1 | 1 | 0 | 0 |
| NM_144568 | 1 | 1 | 1 | 1 | 0 | 0 |
| NM_144569 | 1 | 0 | 1 | 0 | 1 | 1 |
| NM_144570 | 1 | 1 | 1 | 1 | 0 | 1 |
| NM_144571 | 1 | 0 | 1 | 1 | 0 | 1 |
| NM_144573 | 1 | 1 | 1 | 1 | 0 | 0 |
| NM_144574 | 1 | 1 | 1 | 1 | 0 | 0 |
| NM_144575 | 1 | 0 | 1 | 0 | 0 | 0 |
| NM_144576 | 1 | 0 | 1 | 1 | 1 | 1 |
| NM_144577 | 1 | 0 | 1 | 0 | 0 | 1 |
| NM_144578 | 1 | 0 | 1 | 0 | 0 | 1 |
| NM_144579 | 1 | 0 | 1 | 1 | 0 | 1 |

|           |   |   |   |   |   |   |
|-----------|---|---|---|---|---|---|
| NM_144580 | 1 | 1 | 1 | 1 | 1 | 0 |
| NM_144581 | 1 | 1 | 1 | 1 | 0 | 0 |
| NM_144582 | 1 | 0 | 1 | 0 | 0 | 1 |
| NM_144583 | 1 | 0 | 1 | 0 | 0 | 0 |
| NM_144584 | 1 | 0 | 1 | 1 | 1 | 1 |
| NM_144586 | 1 | 0 | 1 | 0 | 0 | 0 |
| NM_144587 | 1 | 0 | 0 | 0 | 0 | 0 |
| NM_144588 | 1 | 0 | 1 | 0 | 0 | 0 |
| NM_144589 | 1 | 1 | 1 | 1 | 0 | 0 |
| NM_144590 | 1 | 0 | 1 | 1 | 0 | 0 |
| NM_144591 | 1 | 0 | 1 | 0 | 0 | 1 |
| NM_144592 | 1 | 1 | 1 | 0 | 1 | 1 |
| NM_144593 | 1 | 0 | 1 | 0 | 0 | 0 |
| NM_144594 | 1 | 1 | 1 | 0 | 0 | 0 |
| NM_144595 | 1 | 0 | 1 | 1 | 0 | 0 |
| NM_144596 | 1 | 0 | 1 | 0 | 0 | 1 |
| NM_144597 | 1 | 0 | 1 | 1 | 1 | 0 |
| NM_144598 | 1 | 0 | 1 | 0 | 1 | 1 |
| NM_144599 | 1 | 1 | 1 | 1 | 0 | 0 |
| NM_144600 | 1 | 0 | 1 | 1 | 0 | 0 |
| NM_144602 | 1 | 1 | 0 | 0 | 0 | 1 |
| NM_144603 | 1 | 0 | 1 | 0 | 0 | 0 |
| NM_144604 | 1 | 0 | 1 | 0 | 0 | 0 |
| NM_144605 | 1 | 0 | 1 | 0 | 0 | 1 |
| NM_144606 | 1 | 0 | 1 | 1 | 0 | 0 |
| NM_144607 | 1 | 1 | 1 | 1 | 1 | 1 |
| NM_144608 | 1 | 0 | 1 | 0 | 0 | 1 |
| NM_144609 | 1 | 1 | 1 | 1 | 0 | 0 |
| NM_144610 | 1 | 1 | 1 | 1 | 0 | 0 |
| NM_144611 | 1 | 1 | 1 | 1 | 1 | 1 |
| NM_144612 | 1 | 0 | 1 | 0 | 0 | 0 |
| NM_144613 | 1 | 0 | 1 | 0 | 1 | 0 |
| NM_144614 | 1 | 0 | 1 | 1 | 0 | 0 |
| NM_144615 | 1 | 1 | 1 | 1 | 0 | 0 |
| NM_144616 | 1 | 0 | 0 | 1 | 0 | 0 |
| NM_144617 | 1 | 0 | 1 | 0 | 0 | 0 |
| NM_144620 | 1 | 1 | 1 | 1 | 0 | 0 |
| NM_144621 | 1 | 0 | 1 | 0 | 0 | 0 |
| NM_144623 | 1 | 1 | 0 | 0 | 0 | 1 |
| NM_144624 | 1 | 0 | 1 | 0 | 0 | 0 |
| NM_144625 | 0 | 0 | 1 | 0 | 0 | 0 |
| NM_144626 | 1 | 0 | 1 | 0 | 0 | 0 |
| NM_144627 | 1 | 0 | 1 | 1 | 0 | 0 |
| NM_144628 | 1 | 0 | 1 | 0 | 0 | 0 |
| NM_144629 | 1 | 0 | 1 | 0 | 0 | 1 |
| NM_144631 | 1 | 0 | 1 | 0 | 0 | 0 |
| NM_144632 | 1 | 0 | 1 | 0 | 0 | 0 |
| NM_144633 | 1 | 1 | 1 | 1 | 1 | 1 |
| NM_144635 | 1 | 1 | 1 | 1 | 0 | 0 |
| NM_144636 | 1 | 1 | 1 | 1 | 0 | 0 |
| NM_144637 | 1 | 0 | 1 | 0 | 1 | 0 |
| NM_144638 | 1 | 0 | 1 | 1 | 1 | 1 |

|           |   |   |   |   |   |   |
|-----------|---|---|---|---|---|---|
| NM_144639 | 1 | 0 | 0 | 0 | 0 | 1 |
| NM_144641 | 1 | 0 | 1 | 0 | 0 | 0 |
| NM_144643 | 1 | 1 | 1 | 1 | 0 | 1 |
| NM_144644 | 1 | 1 | 1 | 1 | 0 | 0 |
| NM_144645 | 1 | 0 | 0 | 0 | 0 | 0 |
| NM_144646 | 1 | 1 | 1 | 1 | 0 | 0 |
| NM_144648 | 1 | 0 | 1 | 0 | 0 | 1 |
| NM_144649 | 1 | 1 | 1 | 1 | 1 | 1 |
| NM_144650 | 1 | 0 | 1 | 0 | 1 | 0 |
| NM_144652 | 1 | 1 | 1 | 0 | 0 | 1 |
| NM_144653 | 1 | 0 | 1 | 1 | 0 | 0 |
| NM_144654 | 1 | 0 | 1 | 1 | 0 | 0 |
| NM_144657 | 0 | 0 | 1 | 0 | 0 | 1 |
| NM_144658 | 1 | 0 | 1 | 0 | 0 | 1 |
| NM_144659 | 0 | 0 | 0 | 1 | 0 | 0 |
| NM_144660 | 1 | 0 | 1 | 1 | 1 | 1 |
| NM_144661 | 1 | 0 | 1 | 0 | 0 | 0 |
| NM_144662 | 1 | 1 | 1 | 0 | 0 | 0 |
| NM_144663 | 1 | 0 | 1 | 0 | 0 | 0 |
| NM_144664 | 1 | 0 | 1 | 0 | 0 | 0 |
| NM_144665 | 1 | 0 | 1 | 0 | 0 | 1 |
| NM_144666 | 1 | 0 | 1 | 1 | 0 | 1 |
| NM_144667 | 0 | 0 | 0 | 1 | 0 | 0 |
| NM_144668 | 1 | 0 | 0 | 1 | 0 | 1 |
| NM_144669 | 1 | 0 | 1 | 1 | 0 | 0 |
| NM_144670 | 1 | 0 | 1 | 1 | 0 | 1 |
| NM_144671 | 1 | 1 | 1 | 1 | 0 | 0 |
| NM_144672 | 1 | 0 | 1 | 0 | 0 | 0 |
| NM_144673 | 1 | 1 | 1 | 1 | 0 | 0 |
| NM_144674 | 1 | 1 | 1 | 1 | 0 | 0 |
| NM_144675 | 0 | 0 | 1 | 0 | 0 | 0 |
| NM_144676 | 1 | 0 | 1 | 0 | 0 | 0 |
| NM_144678 | 1 | 0 | 1 | 0 | 0 | 0 |
| NM_144679 | 1 | 0 | 1 | 0 | 0 | 0 |
| NM_144681 | 1 | 0 | 1 | 0 | 0 | 0 |
| NM_144682 | 1 | 0 | 1 | 0 | 1 | 1 |
| NM_144683 | 1 | 1 | 1 | 1 | 0 | 0 |
| NM_144685 | 1 | 0 | 0 | 0 | 0 | 1 |
| NM_144686 | 1 | 1 | 1 | 1 | 0 | 0 |
| NM_144687 | 1 | 1 | 1 | 1 | 0 | 1 |
| NM_144688 | 1 | 0 | 1 | 0 | 0 | 1 |
| NM_144689 | 1 | 0 | 1 | 0 | 1 | 1 |
| NM_144690 | 1 | 0 | 1 | 0 | 0 | 0 |
| NM_144693 | 1 | 0 | 1 | 1 | 0 | 0 |
| NM_144694 | 1 | 0 | 1 | 0 | 0 | 0 |
| NM_144695 | 1 | 0 | 1 | 1 | 0 | 0 |
| NM_144697 | 1 | 1 | 1 | 1 | 1 | 1 |
| NM_144698 | 1 | 1 | 1 | 1 | 0 | 1 |
| NM_144701 | 1 | 1 | 1 | 0 | 0 | 1 |
| NM_144702 | 1 | 0 | 1 | 0 | 0 | 1 |
| NM_144703 | 1 | 1 | 1 | 0 | 0 | 0 |
| NM_144704 | 1 | 1 | 1 | 0 | 1 | 1 |



|           |   |   |   |   |   |   |
|-----------|---|---|---|---|---|---|
| NM_144705 | 1 | 0 | 1 | 0 | 0 | 1 |
| NM_144706 | 1 | 0 | 1 | 0 | 0 | 0 |
| NM_144707 | 1 | 0 | 1 | 0 | 0 | 0 |
| NM_144709 | 1 | 1 | 1 | 1 | 0 | 0 |
| NM_144710 | 1 | 0 | 1 | 0 | 0 | 1 |
| NM_144711 | 1 | 1 | 1 | 1 | 1 | 0 |
| NM_144712 | 1 | 0 | 1 | 0 | 0 | 0 |
| NM_144715 | 1 | 0 | 1 | 0 | 0 | 0 |
| NM_144716 | 1 | 0 | 1 | 0 | 0 | 0 |
| NM_144717 | 1 | 1 | 1 | 1 | 0 | 0 |
| NM_144718 | 1 | 1 | 1 | 1 | 0 | 1 |
| NM_144719 | 1 | 0 | 1 | 0 | 0 | 0 |
| NM_144720 | 1 | 0 | 1 | 1 | 0 | 0 |
| NM_144721 | 1 | 0 | 1 | 0 | 0 | 1 |
| NM_144723 | 1 | 1 | 1 | 1 | 0 | 1 |
| NM_144724 | 1 | 0 | 1 | 0 | 0 | 0 |
| NM_144726 | 1 | 1 | 1 | 1 | 0 | 0 |
| NM_144727 | 1 | 0 | 1 | 1 | 0 | 0 |
| NM_144733 | 1 | 0 | 1 | 1 | 0 | 0 |
| NM_144736 | 1 | 0 | 1 | 0 | 0 | 0 |
| NM_144765 | 1 | 0 | 1 | 1 | 1 | 1 |
| NM_144766 | 1 | 0 | 1 | 0 | 0 | 0 |
| NM_144767 | 1 | 1 | 1 | 1 | 1 | 1 |
| NM_144770 | 1 | 0 | 1 | 1 | 0 | 0 |
| NM_144771 | 1 | 1 | 1 | 1 | 0 | 0 |
| NM_144772 | 1 | 0 | 1 | 1 | 0 | 1 |
| NM_144773 | 0 | 0 | 0 | 1 | 0 | 0 |
| NM_144774 | 1 | 0 | 0 | 0 | 0 | 1 |
| NM_144775 | 1 | 1 | 1 | 1 | 0 | 0 |
| NM_144776 | 1 | 1 | 1 | 1 | 0 | 0 |
| NM_144777 | 0 | 0 | 0 | 0 | 0 | 1 |
| NM_144778 | 1 | 0 | 1 | 0 | 1 | 1 |
| NM_144780 | 1 | 1 | 1 | 1 | 1 | 1 |
| NM_144781 | 1 | 1 | 1 | 1 | 0 | 0 |
| NM_144949 | 1 | 0 | 1 | 0 | 0 | 0 |
| NM_144956 | 1 | 1 | 1 | 1 | 0 | 0 |
| NM_144962 | 1 | 0 | 1 | 0 | 0 | 0 |
| NM_144963 | 1 | 0 | 1 | 1 | 0 | 0 |
| NM_144964 | 1 | 0 | 1 | 0 | 1 | 1 |
| NM_144965 | 1 | 0 | 1 | 1 | 1 | 1 |
| NM_144966 | 1 | 0 | 1 | 0 | 0 | 0 |
| NM_144968 | 1 | 0 | 1 | 1 | 0 | 0 |
| NM_144969 | 1 | 0 | 1 | 0 | 0 | 0 |
| NM_144970 | 1 | 1 | 1 | 1 | 0 | 1 |
| NM_144971 | 1 | 0 | 1 | 1 | 0 | 0 |
| NM_144972 | 1 | 1 | 1 | 1 | 0 | 0 |
| NM_144973 | 1 | 0 | 1 | 0 | 0 | 0 |
| NM_144974 | 1 | 0 | 1 | 0 | 0 | 0 |
| NM_144975 | 1 | 0 | 0 | 0 | 0 | 1 |
| NM_144977 | 1 | 0 | 1 | 0 | 0 | 0 |
| NM_144978 | 1 | 0 | 1 | 0 | 0 | 0 |
| NM_144979 | 1 | 0 | 1 | 0 | 0 | 1 |

|           |   |   |   |   |   |   |
|-----------|---|---|---|---|---|---|
| NM_144980 | 1 | 1 | 0 | 0 | 0 | 0 |
| NM_144981 | 1 | 1 | 1 | 1 | 0 | 0 |
| NM_144982 | 1 | 0 | 1 | 0 | 0 | 1 |
| NM_144983 | 1 | 0 | 1 | 0 | 0 | 0 |
| NM_144985 | 1 | 1 | 1 | 1 | 0 | 1 |
| NM_144987 | 1 | 0 | 1 | 0 | 0 | 0 |
| NM_144988 | 1 | 1 | 1 | 1 | 0 | 0 |
| NM_144990 | 1 | 0 | 1 | 0 | 0 | 0 |
| NM_144994 | 1 | 0 | 1 | 1 | 0 | 0 |
| NM_144995 | 1 | 0 | 1 | 0 | 0 | 0 |
| NM_144996 | 1 | 0 | 1 | 0 | 1 | 1 |
| NM_144997 | 1 | 0 | 1 | 0 | 0 | 1 |
| NM_144998 | 1 | 1 | 1 | 1 | 0 | 0 |
| NM_144999 | 1 | 1 | 1 | 1 | 0 | 0 |
| NM_145001 | 0 | 1 | 0 | 0 | 0 | 1 |
| NM_145003 | 1 | 1 | 1 | 1 | 0 | 0 |
| NM_145004 | 1 | 0 | 1 | 0 | 0 | 0 |
| NM_145005 | 1 | 0 | 1 | 0 | 0 | 0 |
| NM_145006 | 1 | 1 | 1 | 1 | 0 | 1 |
| NM_145007 | 1 | 0 | 0 | 0 | 0 | 0 |
| NM_145008 | 1 | 0 | 1 | 0 | 1 | 1 |
| NM_145010 | 1 | 1 | 1 | 1 | 1 | 1 |
| NM_145011 | 1 | 0 | 1 | 0 | 1 | 1 |
| NM_145012 | 1 | 1 | 1 | 1 | 0 | 0 |
| NM_145013 | 1 | 1 | 1 | 1 | 0 | 0 |
| NM_145014 | 1 | 0 | 1 | 0 | 0 | 0 |
| NM_145015 | 1 | 1 | 1 | 1 | 0 | 0 |
| NM_145016 | 1 | 1 | 1 | 1 | 0 | 0 |
| NM_145017 | 1 | 0 | 0 | 0 | 0 | 0 |
| NM_145018 | 1 | 1 | 1 | 1 | 0 | 0 |
| NM_145019 | 1 | 1 | 0 | 0 | 0 | 1 |
| NM_145020 | 1 | 0 | 1 | 0 | 0 | 0 |
| NM_145021 | 1 | 0 | 1 | 1 | 0 | 0 |
| NM_145023 | 1 | 0 | 1 | 0 | 0 | 0 |
| NM_145024 | 0 | 0 | 0 | 0 | 0 | 1 |
| NM_145025 | 1 | 0 | 1 | 0 | 0 | 1 |
| NM_145028 | 1 | 1 | 1 | 1 | 1 | 0 |
| NM_145029 | 1 | 0 | 1 | 0 | 0 | 0 |
| NM_145030 | 1 | 0 | 1 | 1 | 0 | 0 |
| NM_145032 | 1 | 1 | 1 | 1 | 1 | 1 |
| NM_145033 | 1 | 1 | 1 | 1 | 0 | 0 |
| NM_145034 | 1 | 0 | 1 | 1 | 1 | 1 |
| NM_145035 | 1 | 1 | 1 | 1 | 0 | 0 |
| NM_145036 | 1 | 1 | 1 | 1 | 0 | 1 |
| NM_145037 | 1 | 0 | 1 | 1 | 0 | 0 |
| NM_145038 | 1 | 1 | 1 | 1 | 0 | 0 |
| NM_145039 | 1 | 1 | 1 | 0 | 0 | 0 |
| NM_145040 | 1 | 1 | 1 | 1 | 0 | 0 |
| NM_145041 | 1 | 1 | 1 | 1 | 0 | 0 |
| NM_145042 | 0 | 0 | 1 | 0 | 0 | 0 |
| NM_145043 | 1 | 1 | 1 | 1 | 1 | 1 |
| NM_145044 | 1 | 0 | 1 | 1 | 0 | 0 |

|           |   |   |   |   |   |   |
|-----------|---|---|---|---|---|---|
| NM_145045 | 1 | 1 | 1 | 0 | 0 | 0 |
| NM_145046 | 1 | 0 | 0 | 0 | 0 | 1 |
| NM_145047 | 1 | 1 | 1 | 1 | 1 | 0 |
| NM_145048 | 1 | 1 | 1 | 1 | 1 | 1 |
| NM_145049 | 1 | 0 | 1 | 1 | 1 | 1 |
| NM_145050 | 1 | 1 | 1 | 1 | 0 | 0 |
| NM_145051 | 0 | 0 | 1 | 1 | 0 | 0 |
| NM_145052 | 1 | 0 | 1 | 1 | 1 | 1 |
| NM_145053 | 1 | 0 | 1 | 1 | 0 | 0 |
| NM_145055 | 1 | 0 | 1 | 1 | 1 | 1 |
| NM_145056 | 1 | 0 | 0 | 0 | 0 | 1 |
| NM_145057 | 1 | 0 | 1 | 1 | 0 | 0 |
| NM_145058 | 1 | 0 | 1 | 1 | 0 | 1 |
| NM_145059 | 1 | 1 | 1 | 1 | 0 | 0 |
| NM_145060 | 1 | 0 | 1 | 0 | 0 | 0 |
| NM_145061 | 1 | 0 | 1 | 0 | 1 | 1 |
| NM_145062 | 1 | 0 | 1 | 0 | 0 | 0 |
| NM_145063 | 1 | 0 | 1 | 1 | 1 | 1 |
| NM_145064 | 1 | 0 | 1 | 0 | 0 | 0 |
| NM_145065 | 1 | 0 | 1 | 0 | 0 | 0 |
| NM_145074 | 1 | 1 | 1 | 1 | 0 | 0 |
| NM_145080 | 1 | 0 | 1 | 1 | 0 | 0 |
| NM_145102 | 1 | 0 | 1 | 1 | 0 | 0 |
| NM_145114 | 1 | 0 | 1 | 1 | 0 | 0 |
| NM_145115 | 1 | 1 | 1 | 1 | 0 | 0 |
| NM_145116 | 1 | 0 | 1 | 0 | 0 | 1 |
| NM_145117 | 1 | 0 | 1 | 0 | 0 | 0 |
| NM_145160 | 1 | 1 | 1 | 1 | 0 | 0 |
| NM_145165 | 1 | 0 | 1 | 0 | 0 | 1 |
| NM_145166 | 1 | 0 | 1 | 1 | 0 | 0 |
| NM_145167 | 1 | 0 | 1 | 0 | 0 | 0 |
| NM_145168 | 1 | 0 | 1 | 1 | 0 | 0 |
| NM_145169 | 1 | 0 | 1 | 1 | 0 | 0 |
| NM_145170 | 1 | 0 | 1 | 0 | 0 | 0 |
| NM_145172 | 1 | 0 | 1 | 0 | 0 | 0 |
| NM_145173 | 1 | 0 | 1 | 0 | 0 | 0 |
| NM_145174 | 1 | 0 | 1 | 0 | 0 | 0 |
| NM_145175 | 1 | 1 | 1 | 0 | 0 | 0 |
| NM_145177 | 1 | 1 | 1 | 1 | 0 | 0 |
| NM_145178 | 1 | 0 | 1 | 0 | 0 | 0 |
| NM_145179 | 0 | 0 | 0 | 0 | 0 | 1 |
| NM_145180 | 1 | 1 | 1 | 0 | 0 | 0 |
| NM_145185 | 0 | 0 | 0 | 0 | 0 | 1 |
| NM_145196 | 1 | 0 | 1 | 1 | 1 | 1 |
| NM_145200 | 1 | 0 | 1 | 1 | 0 | 1 |
| NM_145201 | 1 | 1 | 1 | 1 | 0 | 0 |
| NM_145202 | 1 | 0 | 1 | 1 | 0 | 0 |
| NM_145203 | 1 | 1 | 1 | 1 | 0 | 0 |
| NM_145204 | 1 | 1 | 1 | 1 | 0 | 0 |
| NM_145206 | 1 | 0 | 1 | 0 | 0 | 1 |
| NM_145207 | 1 | 0 | 0 | 0 | 0 | 1 |
| NM_145208 | 1 | 0 | 1 | 0 | 0 | 0 |

|           |   |   |   |   |   |   |
|-----------|---|---|---|---|---|---|
| NM_145212 | 1 | 0 | 1 | 1 | 0 | 0 |
| NM_145214 | 1 | 1 | 1 | 0 | 1 | 1 |
| NM_145231 | 0 | 1 | 0 | 0 | 0 | 0 |
| NM_145232 | 1 | 1 | 1 | 1 | 1 | 0 |
| NM_145233 | 0 | 0 | 0 | 0 | 0 | 1 |
| NM_145235 | 1 | 1 | 1 | 1 | 0 | 1 |
| NM_145236 | 0 | 0 | 0 | 0 | 0 | 1 |
| NM_145237 | 1 | 0 | 1 | 1 | 1 | 1 |
| NM_145238 | 1 | 0 | 1 | 1 | 0 | 0 |
| NM_145239 | 1 | 0 | 1 | 0 | 0 | 0 |
| NM_145241 | 1 | 1 | 1 | 1 | 0 | 1 |
| NM_145242 | 1 | 0 | 1 | 0 | 0 | 1 |
| NM_145243 | 1 | 1 | 1 | 1 | 1 | 1 |
| NM_145244 | 1 | 0 | 1 | 0 | 0 | 1 |
| NM_145245 | 1 | 0 | 1 | 1 | 0 | 0 |
| NM_145246 | 1 | 0 | 1 | 0 | 0 | 0 |
| NM_145247 | 1 | 0 | 1 | 1 | 1 | 1 |
| NM_145249 | 1 | 0 | 1 | 1 | 0 | 1 |
| NM_145251 | 1 | 0 | 1 | 0 | 0 | 1 |
| NM_145252 | 1 | 1 | 1 | 1 | 0 | 0 |
| NM_145253 | 1 | 0 | 1 | 0 | 0 | 0 |
| NM_145254 | 1 | 0 | 1 | 0 | 0 | 1 |
| NM_145256 | 1 | 0 | 1 | 1 | 1 | 1 |
| NM_145257 | 1 | 1 | 1 | 1 | 0 | 1 |
| NM_145258 | 1 | 0 | 1 | 0 | 1 | 0 |
| NM_145259 | 1 | 1 | 1 | 1 | 1 | 1 |
| NM_145261 | 1 | 1 | 1 | 1 | 0 | 1 |
| NM_145262 | 1 | 0 | 1 | 1 | 0 | 0 |
| NM_145263 | 1 | 0 | 1 | 0 | 0 | 0 |
| NM_145265 | 1 | 0 | 1 | 1 | 0 | 0 |
| NM_145266 | 1 | 1 | 1 | 1 | 0 | 1 |
| NM_145267 | 1 | 0 | 1 | 0 | 1 | 1 |
| NM_145268 | 1 | 0 | 1 | 0 | 0 | 1 |
| NM_145269 | 1 | 0 | 1 | 0 | 0 | 0 |
| NM_145271 | 1 | 0 | 1 | 0 | 0 | 0 |
| NM_145272 | 1 | 0 | 1 | 1 | 0 | 0 |
| NM_145274 | 1 | 1 | 1 | 0 | 0 | 0 |
| NM_145275 | 1 | 1 | 1 | 1 | 0 | 0 |
| NM_145276 | 1 | 0 | 1 | 0 | 0 | 1 |
| NM_145277 | 1 | 0 | 1 | 1 | 0 | 1 |
| NM_145278 | 1 | 0 | 1 | 0 | 0 | 0 |
| NM_145279 | 1 | 1 | 1 | 1 | 0 | 1 |
| NM_145280 | 1 | 0 | 1 | 0 | 0 | 0 |
| NM_145282 | 1 | 0 | 1 | 0 | 0 | 0 |
| NM_145283 | 1 | 1 | 1 | 0 | 0 | 0 |
| NM_145284 | 1 | 1 | 1 | 1 | 0 | 0 |
| NM_145285 | 1 | 0 | 1 | 1 | 0 | 0 |
| NM_145286 | 1 | 0 | 1 | 0 | 0 | 0 |
| NM_145287 | 1 | 0 | 1 | 0 | 0 | 0 |
| NM_145288 | 1 | 0 | 1 | 0 | 0 | 0 |
| NM_145291 | 1 | 1 | 1 | 1 | 1 | 1 |
| NM_145293 | 1 | 0 | 1 | 0 | 1 | 0 |

|           |   |   |   |   |   |   |
|-----------|---|---|---|---|---|---|
| NM_145294 | 1 | 0 | 1 | 1 | 1 | 1 |
| NM_145295 | 1 | 1 | 1 | 1 | 0 | 0 |
| NM_145296 | 1 | 0 | 1 | 0 | 0 | 0 |
| NM_145297 | 1 | 0 | 1 | 0 | 0 | 1 |
| NM_145298 | 1 | 0 | 1 | 1 | 0 | 0 |
| NM_145299 | 1 | 0 | 0 | 0 | 0 | 1 |
| NM_145300 | 1 | 0 | 1 | 0 | 0 | 1 |
| NM_145301 | 1 | 0 | 1 | 0 | 0 | 0 |
| NM_145303 | 1 | 1 | 1 | 1 | 0 | 0 |
| NM_145304 | 0 | 0 | 0 | 0 | 1 | 0 |
| NM_145305 | 1 | 1 | 1 | 1 | 0 | 0 |
| NM_145306 | 1 | 1 | 1 | 1 | 0 | 0 |
| NM_145307 | 1 | 1 | 1 | 1 | 0 | 0 |
| NM_145308 | 0 | 0 | 0 | 0 | 0 | 1 |
| NM_145309 | 1 | 1 | 1 | 1 | 0 | 0 |
| NM_145310 | 1 | 1 | 1 | 1 | 0 | 0 |
| NM_145311 | 1 | 0 | 1 | 0 | 0 | 0 |
| NM_145312 | 1 | 0 | 1 | 1 | 1 | 1 |
| NM_145313 | 1 | 0 | 1 | 1 | 0 | 1 |
| NM_145314 | 0 | 0 | 1 | 0 | 0 | 0 |
| NM_145315 | 1 | 0 | 1 | 0 | 0 | 0 |
| NM_145316 | 1 | 1 | 1 | 1 | 0 | 0 |
| NM_145318 | 1 | 1 | 1 | 1 | 0 | 1 |
| NM_145319 | 1 | 1 | 1 | 1 | 1 | 0 |
| NM_145325 | 1 | 0 | 1 | 0 | 0 | 0 |
| NM_145326 | 1 | 0 | 1 | 1 | 0 | 0 |
| NM_145329 | 1 | 0 | 1 | 1 | 0 | 0 |
| NM_145330 | 1 | 1 | 1 | 1 | 1 | 1 |
| NM_145333 | 1 | 0 | 1 | 0 | 1 | 1 |
| NM_145341 | 1 | 0 | 1 | 0 | 0 | 1 |
| NM_145342 | 1 | 1 | 1 | 1 | 1 | 1 |
| NM_145343 | 1 | 0 | 1 | 1 | 0 | 0 |
| NM_145344 | 1 | 1 | 1 | 1 | 1 | 1 |
| NM_145345 | 1 | 0 | 1 | 0 | 0 | 0 |
| NM_145637 | 1 | 0 | 1 | 1 | 1 | 1 |
| NM_145639 | 1 | 0 | 1 | 0 | 0 | 0 |
| NM_145640 | 1 | 0 | 1 | 0 | 0 | 0 |
| NM_145641 | 1 | 0 | 1 | 0 | 0 | 0 |
| NM_145642 | 1 | 0 | 1 | 0 | 0 | 1 |
| NM_145644 | 1 | 0 | 1 | 1 | 0 | 1 |
| NM_145645 | 1 | 1 | 1 | 1 | 1 | 1 |
| NM_145646 | 1 | 1 | 1 | 1 | 0 | 0 |
| NM_145647 | 1 | 1 | 1 | 1 | 0 | 1 |
| NM_145648 | 1 | 0 | 1 | 0 | 0 | 0 |
| NM_145649 | 1 | 1 | 1 | 0 | 0 | 0 |
| NM_145650 | 1 | 0 | 0 | 0 | 0 | 0 |
| NM_145651 | 1 | 0 | 1 | 0 | 0 | 1 |
| NM_145652 | 1 | 0 | 1 | 0 | 0 | 0 |
| NM_145653 | 1 | 0 | 0 | 0 | 0 | 0 |
| NM_145654 | 1 | 0 | 1 | 0 | 1 | 1 |
| NM_145656 | 1 | 0 | 1 | 0 | 0 | 0 |
| NM_145657 | 1 | 1 | 1 | 1 | 0 | 0 |

|           |   |   |   |   |   |   |
|-----------|---|---|---|---|---|---|
| NM_145658 | 1 | 0 | 1 | 0 | 1 | 1 |
| NM_145659 | 1 | 0 | 1 | 1 | 0 | 1 |
| NM_145660 | 1 | 0 | 1 | 0 | 0 | 0 |
| NM_145661 | 1 | 0 | 1 | 0 | 0 | 0 |
| NM_145663 | 1 | 0 | 1 | 0 | 0 | 0 |
| NM_145664 | 0 | 1 | 0 | 0 | 0 | 0 |
| NM_145665 | 0 | 0 | 1 | 0 | 0 | 0 |
| NM_145686 | 1 | 0 | 1 | 1 | 0 | 0 |
| NM_145690 | 1 | 1 | 1 | 1 | 0 | 0 |
| NM_145691 | 1 | 1 | 1 | 1 | 0 | 0 |
| NM_145693 | 1 | 1 | 1 | 1 | 1 | 1 |
| NM_145695 | 1 | 0 | 1 | 0 | 0 | 0 |
| NM_145696 | 1 | 0 | 1 | 1 | 1 | 0 |
| NM_145698 | 1 | 0 | 1 | 0 | 0 | 0 |
| NM_145699 | 1 | 1 | 1 | 1 | 0 | 0 |
| NM_145715 | 1 | 0 | 1 | 1 | 0 | 0 |
| NM_145716 | 1 | 1 | 1 | 1 | 0 | 0 |
| NM_145718 | 1 | 1 | 1 | 1 | 0 | 0 |
| NM_145719 | 1 | 1 | 1 | 1 | 0 | 1 |
| NM_145720 | 1 | 0 | 1 | 0 | 0 | 0 |
| NM_145725 | 1 | 1 | 1 | 1 | 0 | 0 |
| NM_145727 | 1 | 0 | 0 | 0 | 0 | 1 |
| NM_145729 | 1 | 0 | 1 | 1 | 0 | 0 |
| NM_145731 | 1 | 1 | 1 | 1 | 1 | 1 |
| NM_145735 | 1 | 0 | 1 | 0 | 0 | 0 |
| NM_145738 | 1 | 1 | 1 | 1 | 0 | 0 |
| NM_145739 | 1 | 1 | 1 | 1 | 0 | 0 |
| NM_145740 | 1 | 0 | 1 | 0 | 0 | 1 |
| NM_145747 | 1 | 1 | 1 | 1 | 0 | 0 |
| NM_145753 | 1 | 1 | 1 | 1 | 0 | 0 |
| NM_145754 | 1 | 1 | 1 | 1 | 0 | 0 |
| NM_145755 | 1 | 0 | 1 | 0 | 0 | 1 |
| NM_145756 | 1 | 1 | 1 | 1 | 0 | 0 |
| NM_145762 | 1 | 0 | 1 | 1 | 0 | 0 |
| NM_145793 | 1 | 0 | 0 | 0 | 0 | 0 |
| NM_145796 | 1 | 0 | 1 | 0 | 1 | 1 |
| NM_145798 | 1 | 0 | 0 | 0 | 0 | 0 |
| NM_145802 | 1 | 1 | 1 | 1 | 1 | 1 |
| NM_145803 | 1 | 0 | 1 | 0 | 0 | 0 |
| NM_145804 | 1 | 1 | 1 | 1 | 1 | 1 |
| NM_145805 | 1 | 1 | 1 | 1 | 0 | 0 |
| NM_145806 | 1 | 1 | 1 | 1 | 1 | 0 |
| NM_145807 | 1 | 0 | 1 | 0 | 0 | 0 |
| NM_145808 | 1 | 0 | 1 | 1 | 0 | 0 |
| NM_145809 | 1 | 0 | 1 | 0 | 0 | 0 |
| NM_145814 | 1 | 1 | 1 | 1 | 0 | 0 |
| NM_145858 | 1 | 0 | 1 | 1 | 1 | 1 |
| NM_145859 | 1 | 0 | 1 | 1 | 0 | 0 |
| NM_145862 | 1 | 0 | 1 | 0 | 0 | 0 |
| NM_145863 | 1 | 0 | 1 | 1 | 0 | 0 |
| NM_145864 | 1 | 0 | 1 | 0 | 0 | 0 |
| NM_145865 | 1 | 1 | 1 | 1 | 0 | 1 |

|           |   |   |   |   |   |   |
|-----------|---|---|---|---|---|---|
| NM_145872 | 1 | 0 | 0 | 0 | 0 | 1 |
| NM_145886 | 1 | 1 | 1 | 1 | 0 | 0 |
| NM_145888 | 1 | 0 | 1 | 0 | 0 | 0 |
| NM_145896 | 1 | 0 | 1 | 0 | 0 | 0 |
| NM_145897 | 1 | 0 | 1 | 0 | 0 | 0 |
| NM_145898 | 1 | 1 | 1 | 1 | 0 | 0 |
| NM_145899 | 1 | 1 | 1 | 1 | 0 | 0 |
| NM_145906 | 1 | 0 | 1 | 0 | 0 | 0 |
| NM_145911 | 1 | 0 | 1 | 1 | 1 | 1 |
| NM_145912 | 1 | 1 | 1 | 1 | 1 | 1 |
| NM_145914 | 1 | 0 | 1 | 1 | 0 | 0 |
| NM_146387 | 1 | 1 | 1 | 1 | 0 | 1 |
| NM_146421 | 1 | 0 | 1 | 0 | 0 | 0 |
| NM_147127 | 1 | 0 | 1 | 0 | 0 | 0 |
| NM_147128 | 1 | 0 | 1 | 0 | 1 | 1 |
| NM_147130 | 1 | 1 | 1 | 1 | 1 | 0 |
| NM_147131 | 1 | 1 | 1 | 1 | 1 | 1 |
| NM_147132 | 1 | 1 | 1 | 1 | 0 | 0 |
| NM_147147 | 1 | 0 | 1 | 0 | 0 | 0 |
| NM_147148 | 1 | 0 | 1 | 0 | 0 | 1 |
| NM_147149 | 1 | 0 | 1 | 0 | 0 | 1 |
| NM_147150 | 1 | 1 | 1 | 1 | 0 | 1 |
| NM_147156 | 1 | 0 | 1 | 0 | 0 | 0 |
| NM_147157 | 1 | 1 | 1 | 1 | 0 | 0 |
| NM_147159 | 1 | 1 | 1 | 1 | 0 | 0 |
| NM_147160 | 1 | 1 | 1 | 1 | 0 | 0 |
| NM_147161 | 1 | 1 | 1 | 1 | 0 | 0 |
| NM_147162 | 1 | 0 | 1 | 0 | 0 | 0 |
| NM_147164 | 1 | 1 | 1 | 1 | 0 | 0 |
| NM_147166 | 0 | 0 | 1 | 1 | 0 | 0 |
| NM_147172 | 1 | 0 | 1 | 0 | 0 | 0 |
| NM_147181 | 0 | 0 | 1 | 0 | 0 | 0 |
| NM_147184 | 1 | 1 | 1 | 1 | 1 | 1 |
| NM_147187 | 1 | 1 | 1 | 0 | 0 | 0 |
| NM_147188 | 1 | 0 | 1 | 1 | 0 | 0 |
| NM_147189 | 1 | 1 | 1 | 1 | 0 | 0 |
| NM_147190 | 1 | 0 | 1 | 0 | 0 | 0 |
| NM_147192 | 1 | 1 | 0 | 0 | 0 | 0 |
| NM_147193 | 1 | 1 | 0 | 0 | 0 | 0 |
| NM_147194 | 1 | 0 | 1 | 0 | 0 | 1 |
| NM_147195 | 1 | 0 | 1 | 1 | 0 | 0 |
| NM_147196 | 0 | 0 | 0 | 1 | 0 | 0 |
| NM_147197 | 0 | 0 | 1 | 1 | 0 | 0 |
| NM_147198 | 1 | 0 | 1 | 1 | 0 | 0 |
| NM_147200 | 1 | 0 | 1 | 1 | 0 | 1 |
| NM_147202 | 1 | 0 | 1 | 0 | 0 | 0 |
| NM_147204 | 1 | 1 | 1 | 1 | 0 | 0 |
| NM_147223 | 1 | 0 | 1 | 1 | 1 | 1 |
| NM_147780 | 1 | 1 | 1 | 1 | 0 | 0 |
| NM_148169 | 1 | 0 | 1 | 1 | 0 | 0 |
| NM_148170 | 1 | 0 | 1 | 1 | 0 | 0 |
| NM_148172 | 1 | 1 | 1 | 1 | 0 | 0 |

|           |   |   |   |   |   |   |
|-----------|---|---|---|---|---|---|
| NM_148174 | 1 | 1 | 1 | 1 | 0 | 0 |
| NM_148175 | 1 | 1 | 1 | 1 | 0 | 0 |
| NM_148176 | 1 | 1 | 1 | 1 | 1 | 0 |
| NM_148178 | 1 | 0 | 1 | 1 | 0 | 0 |
| NM_148672 | 1 | 0 | 1 | 1 | 1 | 1 |
| NM_148674 | 0 | 0 | 1 | 0 | 0 | 0 |
| NM_148675 | 1 | 0 | 1 | 1 | 0 | 0 |
| NM_148676 | 0 | 1 | 0 | 0 | 0 | 0 |
| NM_148842 | 1 | 1 | 1 | 1 | 1 | 1 |
| NM_148886 | 1 | 1 | 1 | 0 | 0 | 0 |
| NM_148887 | 1 | 0 | 1 | 0 | 0 | 0 |
| NM_148888 | 1 | 0 | 1 | 0 | 0 | 0 |
| NM_148894 | 1 | 0 | 1 | 1 | 0 | 0 |
| NM_148895 | 1 | 1 | 1 | 1 | 0 | 0 |
| NM_148896 | 1 | 0 | 1 | 0 | 0 | 0 |
| NM_148897 | 0 | 0 | 1 | 0 | 1 | 0 |
| NM_148903 | 0 | 0 | 0 | 0 | 0 | 1 |
| NM_148910 | 1 | 1 | 1 | 1 | 0 | 1 |
| NM_148911 | 1 | 0 | 0 | 0 | 0 | 1 |
| NM_148914 | 1 | 0 | 1 | 0 | 0 | 0 |
| NM_148916 | 1 | 0 | 1 | 1 | 0 | 0 |
| NM_148918 | 1 | 1 | 1 | 1 | 0 | 1 |
| NM_148919 | 1 | 0 | 1 | 0 | 1 | 1 |
| NM_148920 | 1 | 0 | 1 | 0 | 0 | 0 |
| NM_148936 | 1 | 1 | 1 | 1 | 0 | 0 |
| NM_148954 | 1 | 0 | 1 | 1 | 0 | 0 |
| NM_148957 | 0 | 1 | 0 | 0 | 0 | 0 |
| NM_148959 | 1 | 0 | 1 | 0 | 0 | 0 |
| NM_148960 | 1 | 0 | 1 | 0 | 0 | 0 |
| NM_148961 | 1 | 0 | 0 | 0 | 0 | 0 |
| NM_148962 | 1 | 0 | 1 | 0 | 0 | 1 |
| NM_148963 | 1 | 0 | 1 | 0 | 0 | 1 |
| NM_148964 | 1 | 0 | 1 | 0 | 0 | 1 |
| NM_148975 | 1 | 1 | 1 | 1 | 0 | 1 |
| NM_152132 | 1 | 0 | 1 | 0 | 0 | 0 |
| NM_152219 | 1 | 0 | 1 | 0 | 0 | 1 |
| NM_152222 | 1 | 0 | 1 | 0 | 1 | 1 |
| NM_152223 | 1 | 0 | 1 | 1 | 0 | 0 |
| NM_152230 | 1 | 1 | 1 | 0 | 0 | 1 |
| NM_152232 | 1 | 0 | 1 | 0 | 0 | 0 |
| NM_152235 | 1 | 1 | 1 | 1 | 1 | 0 |
| NM_152238 | 1 | 0 | 1 | 0 | 0 | 0 |
| NM_152240 | 1 | 1 | 1 | 0 | 0 | 0 |
| NM_152243 | 1 | 0 | 1 | 0 | 0 | 0 |
| NM_152245 | 1 | 1 | 1 | 0 | 0 | 0 |
| NM_152250 | 1 | 0 | 0 | 0 | 0 | 0 |
| NM_152253 | 1 | 1 | 1 | 0 | 0 | 0 |
| NM_152255 | 1 | 1 | 1 | 1 | 0 | 0 |
| NM_152256 | 1 | 0 | 1 | 0 | 0 | 0 |
| NM_152257 | 1 | 0 | 1 | 1 | 0 | 0 |
| NM_152259 | 1 | 0 | 1 | 0 | 0 | 1 |
| NM_152260 | 1 | 0 | 1 | 1 | 0 | 0 |



|           |   |   |   |   |   |   |
|-----------|---|---|---|---|---|---|
| NM_152261 | 1 | 0 | 1 | 1 | 1 | 1 |
| NM_152262 | 1 | 0 | 1 | 0 | 0 | 0 |
| NM_152263 | 1 | 0 | 1 | 1 | 0 | 1 |
| NM_152264 | 1 | 1 | 1 | 1 | 0 | 0 |
| NM_152266 | 1 | 0 | 1 | 1 | 0 | 1 |
| NM_152267 | 1 | 1 | 1 | 1 | 0 | 1 |
| NM_152268 | 1 | 0 | 1 | 1 | 1 | 1 |
| NM_152269 | 1 | 0 | 1 | 1 | 0 | 0 |
| NM_152270 | 1 | 0 | 1 | 1 | 0 | 0 |
| NM_152271 | 1 | 1 | 1 | 1 | 1 | 1 |
| NM_152272 | 1 | 1 | 1 | 1 | 0 | 1 |
| NM_152274 | 1 | 1 | 1 | 1 | 0 | 0 |
| NM_152275 | 1 | 1 | 1 | 1 | 0 | 0 |
| NM_152277 | 1 | 1 | 1 | 1 | 0 | 0 |
| NM_152278 | 1 | 0 | 1 | 1 | 0 | 1 |
| NM_152279 | 1 | 0 | 1 | 1 | 1 | 1 |
| NM_152280 | 1 | 0 | 1 | 1 | 1 | 1 |
| NM_152281 | 1 | 0 | 1 | 1 | 1 | 1 |
| NM_152282 | 1 | 1 | 1 | 1 | 1 | 0 |
| NM_152283 | 1 | 0 | 1 | 1 | 1 | 1 |
| NM_152285 | 1 | 1 | 1 | 1 | 0 | 0 |
| NM_152287 | 1 | 0 | 1 | 0 | 0 | 0 |
| NM_152288 | 1 | 0 | 1 | 0 | 0 | 0 |
| NM_152289 | 1 | 0 | 1 | 0 | 1 | 1 |
| NM_152290 | 1 | 0 | 1 | 0 | 0 | 0 |
| NM_152292 | 1 | 0 | 1 | 0 | 0 | 1 |
| NM_152296 | 1 | 1 | 1 | 1 | 0 | 1 |
| NM_152299 | 1 | 0 | 1 | 1 | 0 | 0 |
| NM_152300 | 1 | 0 | 1 | 0 | 1 | 1 |
| NM_152301 | 1 | 0 | 1 | 1 | 0 | 0 |
| NM_152302 | 1 | 1 | 1 | 1 | 0 | 0 |
| NM_152303 | 1 | 0 | 1 | 1 | 1 | 1 |
| NM_152304 | 1 | 1 | 1 | 1 | 0 | 0 |
| NM_152305 | 1 | 0 | 1 | 0 | 1 | 1 |
| NM_152306 | 1 | 0 | 1 | 1 | 1 | 1 |
| NM_152307 | 1 | 1 | 1 | 1 | 0 | 0 |
| NM_152308 | 1 | 0 | 1 | 1 | 0 | 1 |
| NM_152309 | 1 | 0 | 1 | 0 | 1 | 1 |
| NM_152310 | 1 | 1 | 1 | 1 | 1 | 1 |
| NM_152311 | 1 | 0 | 1 | 0 | 0 | 0 |
| NM_152312 | 1 | 1 | 1 | 0 | 0 | 0 |
| NM_152313 | 1 | 1 | 1 | 1 | 0 | 0 |
| NM_152314 | 1 | 0 | 1 | 0 | 0 | 0 |
| NM_152315 | 0 | 1 | 0 | 0 | 0 | 0 |
| NM_152316 | 1 | 0 | 1 | 0 | 0 | 0 |
| NM_152317 | 1 | 0 | 0 | 0 | 0 | 0 |
| NM_152318 | 1 | 1 | 1 | 1 | 1 | 1 |
| NM_152319 | 0 | 0 | 0 | 1 | 0 | 1 |
| NM_152320 | 1 | 0 | 1 | 0 | 1 | 1 |
| NM_152321 | 1 | 1 | 1 | 1 | 1 | 1 |
| NM_152322 | 1 | 1 | 1 | 1 | 0 | 0 |
| NM_152323 | 1 | 0 | 1 | 0 | 0 | 0 |

|           |   |   |   |   |   |   |
|-----------|---|---|---|---|---|---|
| NM_152324 | 1 | 0 | 1 | 0 | 0 | 1 |
| NM_152326 | 1 | 1 | 1 | 0 | 0 | 1 |
| NM_152328 | 1 | 0 | 1 | 1 | 1 | 1 |
| NM_152329 | 1 | 0 | 1 | 0 | 1 | 1 |
| NM_152330 | 1 | 1 | 1 | 0 | 1 | 1 |
| NM_152331 | 1 | 0 | 0 | 0 | 0 | 0 |
| NM_152332 | 1 | 0 | 1 | 1 | 1 | 1 |
| NM_152333 | 1 | 1 | 1 | 1 | 0 | 0 |
| NM_152334 | 1 | 0 | 1 | 1 | 0 | 0 |
| NM_152335 | 0 | 0 | 1 | 0 | 0 | 0 |
| NM_152336 | 1 | 0 | 1 | 0 | 0 | 0 |
| NM_152337 | 1 | 1 | 1 | 1 | 0 | 0 |
| NM_152338 | 0 | 0 | 0 | 1 | 0 | 0 |
| NM_152339 | 1 | 0 | 1 | 1 | 0 | 0 |
| NM_152340 | 1 | 1 | 1 | 1 | 1 | 1 |
| NM_152341 | 1 | 1 | 1 | 1 | 0 | 0 |
| NM_152342 | 1 | 1 | 1 | 1 | 0 | 0 |
| NM_152343 | 1 | 0 | 1 | 1 | 0 | 0 |
| NM_152344 | 1 | 0 | 1 | 0 | 0 | 0 |
| NM_152345 | 1 | 0 | 1 | 1 | 0 | 0 |
| NM_152346 | 1 | 1 | 1 | 1 | 0 | 0 |
| NM_152347 | 1 | 0 | 1 | 0 | 0 | 1 |
| NM_152348 | 1 | 1 | 1 | 1 | 0 | 0 |
| NM_152349 | 1 | 0 | 1 | 0 | 0 | 1 |
| NM_152350 | 1 | 0 | 1 | 1 | 1 | 1 |
| NM_152351 | 1 | 1 | 1 | 0 | 0 | 1 |
| NM_152352 | 1 | 1 | 1 | 1 | 0 | 0 |
| NM_152353 | 1 | 0 | 1 | 0 | 0 | 0 |
| NM_152354 | 1 | 1 | 1 | 1 | 0 | 0 |
| NM_152355 | 1 | 0 | 1 | 0 | 0 | 0 |
| NM_152356 | 1 | 0 | 1 | 0 | 0 | 1 |
| NM_152357 | 1 | 0 | 1 | 0 | 1 | 1 |
| NM_152358 | 1 | 0 | 1 | 0 | 0 | 0 |
| NM_152359 | 1 | 0 | 1 | 0 | 0 | 1 |
| NM_152360 | 1 | 0 | 1 | 1 | 0 | 0 |
| NM_152361 | 1 | 1 | 1 | 1 | 0 | 0 |
| NM_152363 | 1 | 0 | 1 | 0 | 0 | 0 |
| NM_152364 | 1 | 1 | 0 | 0 | 0 | 1 |
| NM_152365 | 1 | 1 | 1 | 1 | 1 | 1 |
| NM_152366 | 1 | 1 | 1 | 1 | 1 | 1 |
| NM_152367 | 1 | 1 | 1 | 1 | 0 | 1 |
| NM_152369 | 1 | 0 | 1 | 0 | 0 | 1 |
| NM_152372 | 1 | 0 | 1 | 0 | 0 | 0 |
| NM_152373 | 1 | 1 | 1 | 1 | 0 | 0 |
| NM_152374 | 1 | 1 | 1 | 1 | 1 | 0 |
| NM_152376 | 1 | 1 | 1 | 0 | 1 | 1 |
| NM_152377 | 1 | 1 | 1 | 0 | 0 | 0 |
| NM_152378 | 1 | 1 | 1 | 1 | 1 | 1 |
| NM_152379 | 1 | 0 | 1 | 1 | 0 | 0 |
| NM_152381 | 1 | 0 | 1 | 0 | 0 | 0 |
| NM_152382 | 1 | 0 | 1 | 1 | 0 | 0 |
| NM_152383 | 1 | 0 | 1 | 0 | 0 | 0 |

|           |   |   |   |   |   |   |
|-----------|---|---|---|---|---|---|
| NM_152384 | 1 | 0 | 1 | 1 | 0 | 0 |
| NM_152385 | 1 | 0 | 1 | 0 | 1 | 1 |
| NM_152387 | 1 | 0 | 1 | 0 | 0 | 0 |
| NM_152388 | 1 | 0 | 1 | 0 | 0 | 1 |
| NM_152390 | 1 | 1 | 1 | 1 | 0 | 0 |
| NM_152391 | 1 | 1 | 1 | 1 | 1 | 1 |
| NM_152392 | 1 | 1 | 1 | 1 | 1 | 1 |
| NM_152394 | 0 | 0 | 1 | 0 | 0 | 0 |
| NM_152395 | 1 | 1 | 1 | 1 | 1 | 1 |
| NM_152396 | 1 | 1 | 1 | 1 | 0 | 0 |
| NM_152397 | 1 | 1 | 1 | 1 | 0 | 0 |
| NM_152398 | 1 | 1 | 1 | 1 | 0 | 0 |
| NM_152399 | 1 | 0 | 1 | 0 | 0 | 1 |
| NM_152400 | 1 | 1 | 1 | 1 | 0 | 0 |
| NM_152402 | 1 | 0 | 1 | 1 | 0 | 0 |
| NM_152403 | 1 | 1 | 1 | 0 | 0 | 1 |
| NM_152404 | 1 | 0 | 1 | 0 | 0 | 0 |
| NM_152405 | 1 | 0 | 1 | 1 | 1 | 1 |
| NM_152407 | 1 | 0 | 1 | 1 | 0 | 0 |
| NM_152408 | 1 | 0 | 1 | 0 | 1 | 0 |
| NM_152409 | 1 | 1 | 1 | 0 | 0 | 0 |
| NM_152410 | 1 | 0 | 0 | 0 | 0 | 1 |
| NM_152411 | 1 | 1 | 1 | 1 | 0 | 0 |
| NM_152412 | 1 | 1 | 1 | 1 | 0 | 0 |
| NM_152413 | 1 | 1 | 1 | 1 | 0 | 0 |
| NM_152414 | 1 | 0 | 1 | 1 | 0 | 0 |
| NM_152415 | 1 | 0 | 1 | 1 | 0 | 0 |
| NM_152416 | 1 | 1 | 1 | 1 | 0 | 1 |
| NM_152417 | 1 | 0 | 1 | 0 | 0 | 0 |
| NM_152418 | 0 | 0 | 0 | 0 | 0 | 1 |
| NM_152420 | 1 | 0 | 1 | 0 | 0 | 1 |
| NM_152421 | 1 | 1 | 1 | 1 | 0 | 0 |
| NM_152424 | 1 | 0 | 1 | 0 | 0 | 0 |
| NM_152425 | 1 | 1 | 1 | 1 | 0 | 0 |
| NM_152426 | 1 | 0 | 1 | 0 | 0 | 0 |
| NM_152428 | 1 | 0 | 0 | 0 | 0 | 1 |
| NM_152429 | 1 | 0 | 0 | 0 | 0 | 1 |
| NM_152430 | 0 | 0 | 0 | 1 | 0 | 1 |
| NM_152431 | 1 | 1 | 1 | 1 | 0 | 0 |
| NM_152433 | 1 | 1 | 1 | 1 | 1 | 1 |
| NM_152434 | 1 | 1 | 1 | 1 | 0 | 0 |
| NM_152435 | 1 | 0 | 1 | 0 | 0 | 0 |
| NM_152436 | 1 | 0 | 1 | 0 | 0 | 0 |
| NM_152437 | 1 | 0 | 1 | 1 | 1 | 1 |
| NM_152439 | 1 | 0 | 1 | 0 | 0 | 0 |
| NM_152440 | 1 | 0 | 1 | 0 | 1 | 1 |
| NM_152441 | 1 | 1 | 1 | 0 | 0 | 0 |
| NM_152442 | 1 | 0 | 1 | 0 | 0 | 0 |
| NM_152444 | 1 | 1 | 1 | 1 | 0 | 0 |
| NM_152445 | 1 | 0 | 1 | 0 | 0 | 0 |
| NM_152446 | 1 | 0 | 1 | 0 | 0 | 0 |
| NM_152447 | 1 | 0 | 1 | 0 | 0 | 0 |

|           |   |   |   |   |   |   |
|-----------|---|---|---|---|---|---|
| NM_152448 | 0 | 1 | 1 | 1 | 0 | 0 |
| NM_152449 | 1 | 1 | 1 | 1 | 1 | 1 |
| NM_152450 | 1 | 0 | 1 | 0 | 0 | 0 |
| NM_152451 | 1 | 0 | 1 | 0 | 1 | 1 |
| NM_152452 | 1 | 1 | 1 | 1 | 0 | 1 |
| NM_152455 | 1 | 0 | 1 | 0 | 0 | 0 |
| NM_152456 | 1 | 1 | 1 | 1 | 0 | 0 |
| NM_152457 | 1 | 1 | 1 | 1 | 0 | 0 |
| NM_152458 | 1 | 1 | 1 | 0 | 0 | 0 |
| NM_152459 | 1 | 0 | 1 | 1 | 0 | 0 |
| NM_152461 | 1 | 0 | 1 | 0 | 1 | 1 |
| NM_152462 | 1 | 0 | 1 | 1 | 0 | 0 |
| NM_152463 | 1 | 1 | 1 | 0 | 0 | 0 |
| NM_152464 | 1 | 0 | 1 | 0 | 0 | 1 |
| NM_152465 | 1 | 0 | 1 | 0 | 0 | 0 |
| NM_152466 | 1 | 0 | 1 | 0 | 0 | 0 |
| NM_152467 | 1 | 1 | 1 | 1 | 0 | 0 |
| NM_152468 | 1 | 0 | 1 | 0 | 1 | 1 |
| NM_152469 | 1 | 0 | 0 | 0 | 0 | 0 |
| NM_152470 | 1 | 1 | 1 | 0 | 0 | 1 |
| NM_152471 | 1 | 1 | 1 | 1 | 0 | 0 |
| NM_152472 | 1 | 0 | 1 | 0 | 0 | 0 |
| NM_152473 | 1 | 1 | 1 | 1 | 0 | 0 |
| NM_152474 | 1 | 0 | 1 | 1 | 0 | 0 |
| NM_152475 | 1 | 1 | 1 | 0 | 0 | 0 |
| NM_152477 | 1 | 1 | 1 | 1 | 0 | 1 |
| NM_152478 | 1 | 0 | 1 | 0 | 0 | 1 |
| NM_152479 | 1 | 0 | 1 | 0 | 0 | 0 |
| NM_152480 | 1 | 0 | 1 | 0 | 0 | 0 |
| NM_152481 | 1 | 0 | 1 | 0 | 0 | 0 |
| NM_152482 | 1 | 0 | 1 | 1 | 0 | 0 |
| NM_152484 | 1 | 0 | 1 | 0 | 1 | 1 |
| NM_152485 | 1 | 0 | 1 | 1 | 0 | 0 |
| NM_152486 | 1 | 0 | 1 | 0 | 0 | 0 |
| NM_152487 | 1 | 0 | 1 | 0 | 0 | 0 |
| NM_152488 | 1 | 1 | 1 | 0 | 0 | 1 |
| NM_152489 | 0 | 0 | 0 | 0 | 0 | 1 |
| NM_152490 | 1 | 0 | 1 | 0 | 0 | 0 |
| NM_152491 | 1 | 0 | 1 | 0 | 0 | 0 |
| NM_152492 | 1 | 1 | 0 | 0 | 0 | 0 |
| NM_152493 | 1 | 0 | 1 | 1 | 1 | 0 |
| NM_152494 | 1 | 0 | 1 | 0 | 0 | 0 |
| NM_152495 | 1 | 0 | 1 | 0 | 0 | 1 |
| NM_152496 | 1 | 0 | 1 | 0 | 0 | 0 |
| NM_152497 | 1 | 0 | 1 | 0 | 0 | 0 |
| NM_152498 | 1 | 0 | 0 | 0 | 0 | 1 |
| NM_152499 | 1 | 0 | 1 | 0 | 0 | 0 |
| NM_152500 | 1 | 0 | 1 | 1 | 1 | 1 |
| NM_152501 | 1 | 1 | 1 | 1 | 0 | 0 |
| NM_152502 | 1 | 1 | 1 | 1 | 0 | 0 |
| NM_152503 | 1 | 1 | 1 | 0 | 0 | 0 |
| NM_152504 | 1 | 0 | 1 | 0 | 0 | 0 |

|           |   |   |   |   |   |   |
|-----------|---|---|---|---|---|---|
| NM_152505 | 1 | 0 | 0 | 0 | 0 | 1 |
| NM_152506 | 1 | 0 | 1 | 0 | 0 | 0 |
| NM_152507 | 1 | 0 | 1 | 0 | 0 | 0 |
| NM_152508 | 1 | 0 | 1 | 1 | 0 | 0 |
| NM_152509 | 1 | 0 | 1 | 1 | 0 | 0 |
| NM_152510 | 1 | 0 | 0 | 0 | 0 | 0 |
| NM_152511 | 1 | 0 | 1 | 1 | 0 | 1 |
| NM_152512 | 1 | 0 | 1 | 0 | 0 | 1 |
| NM_152515 | 1 | 1 | 1 | 0 | 0 | 0 |
| NM_152516 | 1 | 1 | 1 | 1 | 0 | 0 |
| NM_152517 | 1 | 1 | 1 | 0 | 1 | 1 |
| NM_152518 | 1 | 1 | 1 | 1 | 0 | 1 |
| NM_152519 | 1 | 0 | 1 | 0 | 0 | 1 |
| NM_152522 | 1 | 0 | 1 | 0 | 0 | 0 |
| NM_152523 | 1 | 0 | 1 | 0 | 0 | 0 |
| NM_152524 | 1 | 0 | 1 | 0 | 0 | 1 |
| NM_152525 | 1 | 0 | 1 | 0 | 0 | 1 |
| NM_152526 | 1 | 0 | 1 | 1 | 0 | 0 |
| NM_152527 | 1 | 1 | 1 | 1 | 0 | 0 |
| NM_152528 | 1 | 1 | 1 | 1 | 0 | 0 |
| NM_152530 | 0 | 0 | 1 | 0 | 0 | 0 |
| NM_152531 | 1 | 0 | 1 | 0 | 0 | 0 |
| NM_152532 | 1 | 1 | 1 | 1 | 0 | 0 |
| NM_152533 | 1 | 0 | 1 | 1 | 1 | 1 |
| NM_152534 | 1 | 1 | 1 | 1 | 0 | 0 |
| NM_152536 | 1 | 1 | 1 | 1 | 0 | 1 |
| NM_152539 | 1 | 1 | 0 | 1 | 0 | 0 |
| NM_152540 | 1 | 0 | 1 | 1 | 0 | 0 |
| NM_152541 | 0 | 0 | 0 | 1 | 0 | 0 |
| NM_152542 | 1 | 0 | 1 | 0 | 0 | 1 |
| NM_152543 | 1 | 0 | 1 | 0 | 0 | 0 |
| NM_152544 | 1 | 1 | 1 | 1 | 0 | 0 |
| NM_152545 | 1 | 0 | 1 | 1 | 0 | 0 |
| NM_152546 | 1 | 0 | 1 | 1 | 1 | 1 |
| NM_152547 | 1 | 0 | 1 | 0 | 0 | 0 |
| NM_152548 | 1 | 0 | 1 | 1 | 1 | 1 |
| NM_152549 | 1 | 1 | 1 | 1 | 0 | 0 |
| NM_152550 | 1 | 0 | 1 | 1 | 0 | 0 |
| NM_152551 | 1 | 0 | 1 | 0 | 0 | 0 |
| NM_152552 | 1 | 1 | 1 | 0 | 0 | 0 |
| NM_152553 | 1 | 1 | 1 | 1 | 0 | 0 |
| NM_152556 | 1 | 0 | 1 | 0 | 0 | 0 |
| NM_152557 | 1 | 0 | 1 | 1 | 1 | 1 |
| NM_152558 | 1 | 1 | 1 | 1 | 0 | 0 |
| NM_152559 | 1 | 0 | 1 | 0 | 0 | 0 |
| NM_152561 | 1 | 0 | 1 | 1 | 0 | 0 |
| NM_152566 | 1 | 0 | 1 | 0 | 0 | 0 |
| NM_152567 | 1 | 0 | 1 | 0 | 0 | 1 |
| NM_152568 | 1 | 1 | 1 | 0 | 0 | 1 |
| NM_152569 | 1 | 1 | 1 | 1 | 0 | 0 |
| NM_152570 | 1 | 1 | 1 | 1 | 1 | 1 |
| NM_152571 | 1 | 0 | 1 | 0 | 0 | 0 |

|           |   |   |   |   |   |   |
|-----------|---|---|---|---|---|---|
| NM_152572 | 1 | 0 | 1 | 0 | 0 | 0 |
| NM_152574 | 1 | 1 | 1 | 1 | 0 | 0 |
| NM_152575 | 1 | 1 | 1 | 0 | 0 | 0 |
| NM_152576 | 1 | 0 | 1 | 0 | 0 | 1 |
| NM_152577 | 1 | 0 | 0 | 0 | 0 | 1 |
| NM_152579 | 1 | 0 | 1 | 0 | 0 | 1 |
| NM_152580 | 0 | 0 | 1 | 0 | 0 | 0 |
| NM_152581 | 1 | 1 | 1 | 1 | 1 | 1 |
| NM_152582 | 1 | 1 | 1 | 1 | 0 | 1 |
| NM_152584 | 1 | 0 | 0 | 0 | 0 | 0 |
| NM_152586 | 1 | 0 | 1 | 1 | 1 | 1 |
| NM_152587 | 1 | 0 | 1 | 0 | 0 | 0 |
| NM_152588 | 1 | 1 | 1 | 1 | 0 | 0 |
| NM_152590 | 0 | 0 | 0 | 0 | 0 | 1 |
| NM_152591 | 1 | 0 | 1 | 0 | 0 | 0 |
| NM_152592 | 1 | 1 | 1 | 0 | 1 | 0 |
| NM_152594 | 1 | 0 | 1 | 0 | 0 | 1 |
| NM_152595 | 1 | 0 | 1 | 0 | 0 | 0 |
| NM_152597 | 1 | 1 | 1 | 1 | 0 | 1 |
| NM_152598 | 0 | 0 | 1 | 0 | 0 | 0 |
| NM_152599 | 1 | 1 | 1 | 1 | 0 | 0 |
| NM_152600 | 1 | 1 | 1 | 1 | 0 | 0 |
| NM_152601 | 1 | 1 | 1 | 1 | 1 | 1 |
| NM_152602 | 1 | 0 | 1 | 0 | 0 | 0 |
| NM_152603 | 1 | 0 | 1 | 1 | 0 | 0 |
| NM_152604 | 1 | 0 | 1 | 1 | 0 | 0 |
| NM_152605 | 1 | 1 | 1 | 0 | 1 | 1 |
| NM_152606 | 1 | 0 | 1 | 1 | 0 | 0 |
| NM_152607 | 1 | 1 | 1 | 1 | 1 | 0 |
| NM_152608 | 1 | 1 | 1 | 1 | 0 | 0 |
| NM_152609 | 1 | 0 | 1 | 0 | 0 | 0 |
| NM_152611 | 1 | 0 | 1 | 0 | 0 | 1 |
| NM_152612 | 1 | 0 | 1 | 0 | 0 | 1 |
| NM_152613 | 1 | 0 | 1 | 0 | 0 | 0 |
| NM_152614 | 1 | 0 | 1 | 1 | 0 | 0 |
| NM_152615 | 1 | 0 | 1 | 0 | 1 | 1 |
| NM_152616 | 0 | 0 | 1 | 0 | 0 | 0 |
| NM_152617 | 1 | 1 | 1 | 1 | 0 | 0 |
| NM_152618 | 0 | 0 | 1 | 0 | 0 | 1 |
| NM_152619 | 1 | 1 | 1 | 1 | 0 | 1 |
| NM_152621 | 1 | 1 | 1 | 1 | 0 | 0 |
| NM_152622 | 1 | 1 | 1 | 0 | 0 | 0 |
| NM_152623 | 1 | 1 | 1 | 1 | 0 | 0 |
| NM_152624 | 1 | 1 | 1 | 1 | 0 | 0 |
| NM_152625 | 1 | 1 | 1 | 1 | 0 | 1 |
| NM_152626 | 1 | 0 | 1 | 0 | 0 | 0 |
| NM_152627 | 1 | 0 | 1 | 1 | 0 | 0 |
| NM_152628 | 0 | 0 | 0 | 0 | 0 | 1 |
| NM_152629 | 1 | 1 | 1 | 1 | 1 | 1 |
| NM_152632 | 1 | 1 | 1 | 1 | 0 | 0 |
| NM_152633 | 1 | 1 | 1 | 1 | 0 | 1 |
| NM_152634 | 1 | 0 | 1 | 1 | 1 | 0 |

|           |   |   |   |   |   |   |
|-----------|---|---|---|---|---|---|
| NM_152635 | 1 | 0 | 0 | 0 | 0 | 0 |
| NM_152636 | 1 | 1 | 1 | 1 | 0 | 0 |
| NM_152637 | 1 | 0 | 1 | 0 | 0 | 0 |
| NM_152638 | 1 | 0 | 1 | 0 | 0 | 0 |
| NM_152639 | 1 | 0 | 1 | 0 | 1 | 0 |
| NM_152640 | 1 | 0 | 1 | 1 | 0 | 0 |
| NM_152642 | 1 | 1 | 1 | 1 | 0 | 0 |
| NM_152643 | 1 | 0 | 0 | 0 | 0 | 1 |
| NM_152644 | 1 | 0 | 1 | 1 | 0 | 0 |
| NM_152645 | 0 | 0 | 1 | 0 | 0 | 0 |
| NM_152646 | 1 | 0 | 1 | 0 | 0 | 0 |
| NM_152647 | 1 | 1 | 1 | 1 | 0 | 0 |
| NM_152649 | 1 | 1 | 1 | 1 | 1 | 1 |
| NM_152652 | 1 | 1 | 1 | 1 | 0 | 1 |
| NM_152653 | 1 | 1 | 1 | 1 | 0 | 1 |
| NM_152654 | 1 | 0 | 1 | 0 | 0 | 0 |
| NM_152655 | 1 | 1 | 1 | 1 | 1 | 0 |
| NM_152657 | 1 | 0 | 1 | 0 | 0 | 1 |
| NM_152658 | 1 | 0 | 1 | 1 | 0 | 0 |
| NM_152660 | 1 | 0 | 1 | 0 | 0 | 0 |
| NM_152661 | 1 | 0 | 0 | 0 | 0 | 0 |
| NM_152662 | 1 | 0 | 0 | 0 | 0 | 0 |
| NM_152663 | 1 | 1 | 1 | 1 | 0 | 1 |
| NM_152665 | 1 | 0 | 1 | 0 | 0 | 0 |
| NM_152666 | 0 | 0 | 0 | 1 | 0 | 0 |
| NM_152667 | 1 | 0 | 1 | 0 | 0 | 1 |
| NM_152669 | 1 | 0 | 0 | 0 | 0 | 1 |
| NM_152670 | 0 | 0 | 1 | 0 | 0 | 0 |
| NM_152671 | 1 | 0 | 1 | 0 | 0 | 0 |
| NM_152672 | 1 | 0 | 1 | 0 | 0 | 0 |
| NM_152673 | 1 | 0 | 1 | 1 | 0 | 0 |
| NM_152676 | 1 | 1 | 1 | 1 | 1 | 1 |
| NM_152678 | 1 | 1 | 1 | 0 | 1 | 1 |
| NM_152679 | 1 | 0 | 1 | 0 | 0 | 0 |
| NM_152680 | 1 | 1 | 1 | 1 | 0 | 1 |
| NM_152681 | 1 | 1 | 1 | 1 | 0 | 0 |
| NM_152682 | 1 | 1 | 1 | 0 | 1 | 1 |
| NM_152683 | 1 | 0 | 1 | 1 | 1 | 0 |
| NM_152684 | 1 | 0 | 1 | 0 | 1 | 1 |
| NM_152685 | 1 | 0 | 1 | 0 | 0 | 0 |
| NM_152686 | 1 | 1 | 1 | 1 | 0 | 0 |
| NM_152687 | 1 | 0 | 1 | 0 | 1 | 1 |
| NM_152688 | 1 | 0 | 1 | 0 | 0 | 0 |
| NM_152689 | 1 | 1 | 1 | 1 | 0 | 0 |
| NM_152690 | 1 | 0 | 1 | 0 | 0 | 0 |
| NM_152692 | 1 | 0 | 1 | 0 | 1 | 1 |
| NM_152693 | 1 | 1 | 1 | 1 | 0 | 0 |
| NM_152694 | 0 | 0 | 0 | 1 | 0 | 0 |
| NM_152695 | 1 | 1 | 1 | 1 | 0 | 0 |
| NM_152696 | 1 | 0 | 1 | 0 | 0 | 0 |
| NM_152699 | 1 | 1 | 1 | 1 | 0 | 0 |
| NM_152700 | 1 | 0 | 1 | 0 | 0 | 0 |

|           |   |   |   |   |   |   |
|-----------|---|---|---|---|---|---|
| NM_152701 | 1 | 1 | 1 | 1 | 0 | 0 |
| NM_152702 | 1 | 0 | 1 | 0 | 0 | 0 |
| NM_152703 | 1 | 1 | 1 | 1 | 0 | 0 |
| NM_152704 | 1 | 0 | 1 | 0 | 0 | 0 |
| NM_152705 | 1 | 0 | 1 | 1 | 1 | 1 |
| NM_152706 | 1 | 0 | 1 | 1 | 0 | 0 |
| NM_152707 | 1 | 0 | 1 | 0 | 0 | 0 |
| NM_152709 | 1 | 0 | 1 | 1 | 0 | 0 |
| NM_152710 | 1 | 0 | 1 | 0 | 0 | 1 |
| NM_152711 | 1 | 0 | 1 | 0 | 0 | 0 |
| NM_152713 | 1 | 1 | 1 | 1 | 0 | 0 |
| NM_152715 | 1 | 0 | 1 | 1 | 0 | 0 |
| NM_152716 | 1 | 0 | 1 | 0 | 1 | 1 |
| NM_152717 | 1 | 0 | 0 | 0 | 0 | 1 |
| NM_152718 | 1 | 0 | 1 | 0 | 0 | 1 |
| NM_152719 | 1 | 0 | 0 | 0 | 0 | 0 |
| NM_152720 | 1 | 0 | 1 | 1 | 1 | 1 |
| NM_152721 | 1 | 0 | 1 | 0 | 1 | 1 |
| NM_152722 | 0 | 0 | 0 | 0 | 0 | 1 |
| NM_152723 | 1 | 1 | 1 | 1 | 0 | 0 |
| NM_152725 | 1 | 1 | 1 | 0 | 0 | 1 |
| NM_152726 | 1 | 0 | 1 | 0 | 0 | 0 |
| NM_152727 | 1 | 1 | 1 | 1 | 1 | 1 |
| NM_152729 | 1 | 0 | 1 | 1 | 0 | 0 |
| NM_152730 | 1 | 0 | 1 | 0 | 0 | 1 |
| NM_152731 | 1 | 0 | 1 | 0 | 0 | 0 |
| NM_152732 | 1 | 0 | 1 | 0 | 0 | 0 |
| NM_152733 | 1 | 0 | 1 | 0 | 0 | 0 |
| NM_152734 | 1 | 0 | 1 | 0 | 0 | 0 |
| NM_152735 | 1 | 0 | 1 | 1 | 1 | 1 |
| NM_152736 | 1 | 1 | 1 | 1 | 1 | 1 |
| NM_152737 | 1 | 0 | 1 | 0 | 0 | 0 |
| NM_152738 | 0 | 0 | 0 | 1 | 0 | 0 |
| NM_152739 | 1 | 0 | 1 | 1 | 0 | 0 |
| NM_152740 | 1 | 1 | 1 | 1 | 0 | 0 |
| NM_152742 | 1 | 0 | 1 | 1 | 0 | 1 |
| NM_152743 | 1 | 1 | 1 | 1 | 0 | 0 |
| NM_152746 | 1 | 1 | 0 | 0 | 0 | 1 |
| NM_152747 | 1 | 0 | 1 | 0 | 0 | 1 |
| NM_152748 | 1 | 1 | 1 | 1 | 1 | 1 |
| NM_152749 | 1 | 0 | 1 | 0 | 0 | 0 |
| NM_152750 | 1 | 0 | 0 | 0 | 0 | 0 |
| NM_152751 | 1 | 0 | 1 | 0 | 0 | 1 |
| NM_152753 | 1 | 0 | 1 | 1 | 0 | 0 |
| NM_152755 | 1 | 0 | 1 | 1 | 0 | 0 |
| NM_152756 | 1 | 0 | 0 | 0 | 0 | 1 |
| NM_152757 | 1 | 0 | 1 | 0 | 0 | 0 |
| NM_152758 | 1 | 0 | 1 | 1 | 0 | 0 |
| NM_152759 | 1 | 0 | 1 | 0 | 0 | 0 |
| NM_152760 | 1 | 0 | 1 | 0 | 0 | 0 |
| NM_152762 | 1 | 0 | 1 | 0 | 1 | 0 |
| NM_152764 | 1 | 1 | 1 | 1 | 0 | 0 |



|           |   |   |   |   |   |   |
|-----------|---|---|---|---|---|---|
| NM_152765 | 1 | 0 | 1 | 1 | 0 | 0 |
| NM_152766 | 1 | 0 | 1 | 1 | 0 | 0 |
| NM_152768 | 1 | 0 | 0 | 0 | 0 | 0 |
| NM_152769 | 1 | 0 | 1 | 0 | 0 | 0 |
| NM_152771 | 1 | 0 | 1 | 0 | 0 | 0 |
| NM_152772 | 1 | 0 | 1 | 1 | 0 | 1 |
| NM_152773 | 1 | 0 | 1 | 0 | 0 | 0 |
| NM_152774 | 1 | 0 | 0 | 0 | 0 | 1 |
| NM_152776 | 1 | 0 | 1 | 0 | 1 | 1 |
| NM_152778 | 1 | 0 | 1 | 1 | 0 | 0 |
| NM_152779 | 0 | 1 | 1 | 1 | 0 | 0 |
| NM_152780 | 1 | 0 | 0 | 0 | 0 | 0 |
| NM_152781 | 1 | 0 | 1 | 1 | 0 | 0 |
| NM_152782 | 1 | 1 | 1 | 1 | 0 | 0 |
| NM_152783 | 1 | 0 | 1 | 1 | 1 | 1 |
| NM_152784 | 1 | 0 | 0 | 1 | 0 | 0 |
| NM_152785 | 1 | 1 | 1 | 1 | 1 | 1 |
| NM_152787 | 1 | 1 | 1 | 1 | 0 | 1 |
| NM_152788 | 0 | 0 | 1 | 0 | 0 | 0 |
| NM_152789 | 1 | 0 | 1 | 0 | 1 | 1 |
| NM_152791 | 1 | 0 | 1 | 1 | 0 | 0 |
| NM_152792 | 1 | 1 | 1 | 1 | 1 | 1 |
| NM_152793 | 1 | 0 | 1 | 0 | 0 | 0 |
| NM_152794 | 1 | 1 | 1 | 1 | 0 | 0 |
| NM_152795 | 1 | 0 | 1 | 1 | 0 | 0 |
| NM_152796 | 1 | 1 | 1 | 1 | 0 | 0 |
| NM_152826 | 1 | 0 | 1 | 1 | 0 | 0 |
| NM_152827 | 1 | 0 | 1 | 0 | 0 | 0 |
| NM_152829 | 1 | 0 | 1 | 0 | 0 | 0 |
| NM_152830 | 1 | 0 | 1 | 0 | 0 | 0 |
| NM_152831 | 1 | 0 | 0 | 0 | 0 | 0 |
| NM_152832 | 1 | 0 | 1 | 0 | 1 | 1 |
| NM_152834 | 1 | 0 | 1 | 1 | 0 | 0 |
| NM_152835 | 1 | 0 | 1 | 0 | 1 | 0 |
| NM_152836 | 1 | 1 | 1 | 1 | 0 | 0 |
| NM_152838 | 1 | 0 | 1 | 1 | 1 | 1 |
| NM_152841 | 1 | 1 | 1 | 1 | 0 | 0 |
| NM_152850 | 1 | 0 | 1 | 1 | 0 | 0 |
| NM_152851 | 1 | 1 | 1 | 1 | 0 | 0 |
| NM_152854 | 1 | 1 | 1 | 1 | 0 | 1 |
| NM_152857 | 1 | 1 | 1 | 1 | 1 | 1 |
| NM_152860 | 1 | 1 | 1 | 1 | 0 | 1 |
| NM_152862 | 1 | 0 | 1 | 0 | 0 | 1 |
| NM_152864 | 1 | 0 | 1 | 0 | 0 | 1 |
| NM_152866 | 1 | 0 | 1 | 0 | 0 | 0 |
| NM_152873 | 1 | 0 | 1 | 0 | 1 | 1 |
| NM_152889 | 1 | 1 | 1 | 1 | 1 | 1 |
| NM_152890 | 1 | 1 | 1 | 1 | 0 | 1 |
| NM_152891 | 1 | 1 | 1 | 1 | 0 | 0 |
| NM_152892 | 1 | 1 | 1 | 1 | 0 | 1 |
| NM_152897 | 1 | 0 | 1 | 0 | 0 | 0 |
| NM_152898 | 1 | 0 | 1 | 0 | 0 | 1 |

|           |   |   |   |   |   |   |
|-----------|---|---|---|---|---|---|
| NM_152899 | 1 | 1 | 1 | 1 | 0 | 0 |
| NM_152900 | 1 | 1 | 1 | 1 | 0 | 0 |
| NM_152901 | 1 | 1 | 1 | 1 | 0 | 0 |
| NM_152902 | 1 | 0 | 1 | 1 | 0 | 0 |
| NM_152903 | 1 | 0 | 1 | 0 | 0 | 0 |
| NM_152904 | 1 | 1 | 1 | 1 | 1 | 0 |
| NM_152905 | 1 | 0 | 1 | 0 | 0 | 0 |
| NM_152906 | 1 | 0 | 1 | 0 | 0 | 0 |
| NM_152907 | 0 | 1 | 1 | 0 | 0 | 0 |
| NM_152911 | 1 | 0 | 1 | 1 | 0 | 1 |
| NM_152912 | 1 | 0 | 1 | 0 | 0 | 1 |
| NM_152913 | 1 | 0 | 1 | 0 | 0 | 0 |
| NM_152914 | 1 | 0 | 1 | 1 | 0 | 0 |
| NM_152916 | 1 | 0 | 0 | 0 | 0 | 0 |
| NM_152924 | 1 | 1 | 1 | 1 | 1 | 1 |
| NM_152930 | 1 | 0 | 1 | 0 | 1 | 1 |
| NM_152932 | 1 | 0 | 1 | 1 | 1 | 1 |
| NM_152933 | 1 | 0 | 1 | 0 | 0 | 0 |
| NM_152939 | 1 | 1 | 1 | 1 | 0 | 0 |
| NM_152942 | 1 | 0 | 1 | 1 | 0 | 1 |
| NM_152945 | 1 | 0 | 1 | 1 | 1 | 1 |
| NM_152989 | 1 | 0 | 1 | 0 | 0 | 0 |
| NM_152990 | 0 | 0 | 0 | 0 | 0 | 1 |
| NM_152992 | 1 | 0 | 1 | 0 | 1 | 1 |
| NM_152994 | 1 | 1 | 1 | 1 | 0 | 0 |
| NM_152995 | 1 | 0 | 1 | 0 | 0 | 1 |
| NM_152996 | 1 | 1 | 1 | 1 | 0 | 1 |
| NM_152997 | 0 | 0 | 0 | 0 | 0 | 1 |
| NM_152998 | 1 | 0 | 1 | 0 | 0 | 1 |
| NM_152999 | 1 | 0 | 0 | 0 | 0 | 1 |
| NM_153000 | 1 | 1 | 1 | 1 | 1 | 1 |
| NM_153002 | 1 | 0 | 1 | 0 | 0 | 0 |
| NM_153003 | 1 | 1 | 1 | 1 | 0 | 0 |
| NM_153005 | 1 | 0 | 1 | 1 | 1 | 1 |
| NM_153006 | 1 | 0 | 1 | 0 | 0 | 0 |
| NM_153007 | 0 | 0 | 1 | 0 | 0 | 0 |
| NM_153008 | 1 | 1 | 1 | 0 | 0 | 0 |
| NM_153009 | 1 | 0 | 1 | 0 | 0 | 0 |
| NM_153011 | 1 | 1 | 1 | 1 | 0 | 0 |
| NM_153013 | 1 | 0 | 1 | 0 | 1 | 1 |
| NM_153014 | 1 | 1 | 1 | 1 | 0 | 0 |
| NM_153017 | 1 | 0 | 1 | 0 | 0 | 1 |
| NM_153018 | 1 | 0 | 1 | 1 | 0 | 0 |
| NM_153019 | 0 | 0 | 1 | 0 | 0 | 0 |
| NM_153020 | 1 | 0 | 1 | 0 | 0 | 0 |
| NM_153021 | 1 | 1 | 1 | 1 | 1 | 1 |
| NM_153022 | 1 | 1 | 1 | 1 | 0 | 0 |
| NM_153023 | 1 | 0 | 1 | 0 | 0 | 1 |
| NM_153024 | 1 | 1 | 1 | 1 | 0 | 0 |
| NM_153025 | 1 | 0 | 1 | 0 | 0 | 1 |
| NM_153026 | 1 | 0 | 1 | 0 | 0 | 0 |
| NM_153027 | 1 | 0 | 0 | 0 | 0 | 0 |

|           |   |   |   |   |   |   |
|-----------|---|---|---|---|---|---|
| NM_153028 | 1 | 1 | 1 | 1 | 1 | 1 |
| NM_153029 | 1 | 1 | 1 | 1 | 0 | 0 |
| NM_153030 | 1 | 0 | 1 | 0 | 0 | 0 |
| NM_153032 | 1 | 0 | 1 | 0 | 1 | 1 |
| NM_153033 | 1 | 1 | 1 | 1 | 0 | 1 |
| NM_153035 | 1 | 0 | 1 | 0 | 0 | 1 |
| NM_153036 | 1 | 0 | 0 | 0 | 0 | 1 |
| NM_153039 | 1 | 0 | 1 | 0 | 0 | 0 |
| NM_153040 | 0 | 0 | 0 | 1 | 0 | 0 |
| NM_153043 | 1 | 0 | 1 | 0 | 0 | 1 |
| NM_153044 | 1 | 0 | 1 | 1 | 0 | 0 |
| NM_153045 | 1 | 0 | 1 | 0 | 0 | 0 |
| NM_153047 | 1 | 0 | 1 | 1 | 1 | 1 |
| NM_153184 | 1 | 0 | 0 | 0 | 0 | 0 |
| NM_153186 | 1 | 1 | 1 | 1 | 0 | 0 |
| NM_153188 | 1 | 0 | 1 | 0 | 0 | 0 |
| NM_153200 | 1 | 0 | 1 | 0 | 0 | 0 |
| NM_153201 | 1 | 0 | 1 | 0 | 0 | 0 |
| NM_153202 | 1 | 0 | 1 | 1 | 0 | 0 |
| NM_153203 | 1 | 0 | 1 | 1 | 0 | 0 |
| NM_153204 | 1 | 0 | 1 | 1 | 0 | 0 |
| NM_153205 | 1 | 0 | 1 | 1 | 0 | 0 |
| NM_153206 | 1 | 0 | 1 | 0 | 0 | 0 |
| NM_153207 | 1 | 0 | 1 | 0 | 0 | 0 |
| NM_153208 | 1 | 1 | 1 | 1 | 1 | 1 |
| NM_153209 | 1 | 0 | 1 | 1 | 0 | 0 |
| NM_153211 | 1 | 1 | 1 | 1 | 0 | 0 |
| NM_153212 | 1 | 0 | 0 | 0 | 0 | 0 |
| NM_153213 | 1 | 0 | 1 | 1 | 0 | 1 |
| NM_153214 | 1 | 1 | 1 | 1 | 0 | 0 |
| NM_153215 | 1 | 1 | 1 | 1 | 0 | 0 |
| NM_153216 | 1 | 0 | 1 | 1 | 0 | 0 |
| NM_153217 | 1 | 0 | 0 | 0 | 0 | 0 |
| NM_153218 | 1 | 0 | 1 | 0 | 0 | 1 |
| NM_153219 | 1 | 1 | 1 | 1 | 0 | 0 |
| NM_153220 | 1 | 0 | 1 | 1 | 0 | 0 |
| NM_153221 | 1 | 0 | 1 | 0 | 0 | 0 |
| NM_153223 | 1 | 0 | 1 | 0 | 1 | 1 |
| NM_153224 | 1 | 1 | 1 | 1 | 0 | 0 |
| NM_153225 | 1 | 1 | 1 | 1 | 0 | 0 |
| NM_153226 | 1 | 0 | 1 | 1 | 0 | 1 |
| NM_153227 | 1 | 1 | 0 | 0 | 0 | 1 |
| NM_153228 | 1 | 0 | 1 | 0 | 0 | 0 |
| NM_153229 | 1 | 0 | 0 | 0 | 0 | 0 |
| NM_153230 | 1 | 0 | 0 | 0 | 0 | 1 |
| NM_153231 | 1 | 0 | 1 | 1 | 1 | 1 |
| NM_153232 | 1 | 1 | 1 | 1 | 0 | 1 |
| NM_153233 | 1 | 1 | 1 | 1 | 0 | 0 |
| NM_153234 | 1 | 0 | 1 | 0 | 0 | 0 |
| NM_153236 | 1 | 0 | 1 | 0 | 0 | 0 |
| NM_153237 | 1 | 1 | 1 | 1 | 0 | 0 |
| NM_153238 | 0 | 0 | 1 | 0 | 0 | 0 |

|           |   |   |   |   |   |   |
|-----------|---|---|---|---|---|---|
| NM_153239 | 1 | 0 | 1 | 0 | 0 | 0 |
| NM_153240 | 1 | 0 | 1 | 1 | 0 | 1 |
| NM_153241 | 0 | 0 | 1 | 0 | 0 | 0 |
| NM_153243 | 1 | 0 | 1 | 1 | 0 | 0 |
| NM_153244 | 1 | 1 | 1 | 0 | 0 | 0 |
| NM_153246 | 1 | 0 | 1 | 0 | 0 | 0 |
| NM_153247 | 1 | 1 | 1 | 0 | 0 | 0 |
| NM_153248 | 1 | 1 | 1 | 1 | 0 | 1 |
| NM_153250 | 1 | 1 | 1 | 1 | 1 | 1 |
| NM_153251 | 1 | 1 | 1 | 1 | 0 | 0 |
| NM_153252 | 1 | 0 | 1 | 0 | 0 | 0 |
| NM_153254 | 1 | 0 | 1 | 0 | 0 | 0 |
| NM_153255 | 1 | 0 | 1 | 0 | 0 | 0 |
| NM_153256 | 1 | 1 | 1 | 1 | 1 | 1 |
| NM_153257 | 1 | 0 | 1 | 1 | 0 | 0 |
| NM_153260 | 1 | 1 | 1 | 1 | 0 | 0 |
| NM_153261 | 1 | 1 | 1 | 1 | 1 | 1 |
| NM_153262 | 1 | 1 | 1 | 0 | 0 | 0 |
| NM_153263 | 1 | 1 | 1 | 1 | 1 | 1 |
| NM_153265 | 1 | 0 | 1 | 1 | 0 | 1 |
| NM_153266 | 1 | 0 | 1 | 0 | 0 | 0 |
| NM_153267 | 1 | 1 | 1 | 1 | 0 | 0 |
| NM_153268 | 1 | 1 | 1 | 0 | 0 | 0 |
| NM_153269 | 1 | 0 | 1 | 0 | 0 | 0 |
| NM_153270 | 1 | 1 | 1 | 1 | 0 | 0 |
| NM_153271 | 1 | 0 | 1 | 1 | 1 | 0 |
| NM_153273 | 1 | 1 | 1 | 1 | 0 | 0 |
| NM_153274 | 1 | 0 | 1 | 1 | 0 | 0 |
| NM_153279 | 1 | 0 | 1 | 1 | 0 | 1 |
| NM_153280 | 1 | 1 | 1 | 1 | 0 | 0 |
| NM_153290 | 1 | 0 | 1 | 1 | 0 | 0 |
| NM_153291 | 1 | 1 | 1 | 1 | 0 | 0 |
| NM_153320 | 1 | 0 | 1 | 0 | 0 | 0 |
| NM_153321 | 1 | 1 | 1 | 1 | 0 | 0 |
| NM_153324 | 1 | 0 | 1 | 0 | 1 | 1 |
| NM_153325 | 0 | 1 | 0 | 0 | 0 | 0 |
| NM_153326 | 1 | 1 | 1 | 1 | 0 | 0 |
| NM_153329 | 1 | 0 | 1 | 0 | 0 | 0 |
| NM_153330 | 1 | 1 | 1 | 1 | 0 | 0 |
| NM_153331 | 1 | 0 | 1 | 1 | 0 | 0 |
| NM_153332 | 1 | 1 | 1 | 1 | 0 | 0 |
| NM_153333 | 1 | 0 | 1 | 1 | 0 | 1 |
| NM_153335 | 1 | 0 | 1 | 0 | 0 | 0 |
| NM_153336 | 1 | 1 | 1 | 0 | 1 | 1 |
| NM_153337 | 1 | 0 | 1 | 0 | 0 | 0 |
| NM_153338 | 1 | 1 | 1 | 1 | 0 | 0 |
| NM_153339 | 1 | 1 | 1 | 0 | 0 | 0 |
| NM_153340 | 1 | 0 | 1 | 0 | 0 | 0 |
| NM_153341 | 1 | 1 | 1 | 1 | 0 | 0 |
| NM_153342 | 1 | 1 | 1 | 1 | 0 | 1 |
| NM_153344 | 1 | 0 | 0 | 1 | 0 | 1 |
| NM_153345 | 1 | 0 | 1 | 0 | 0 | 0 |

|           |   |   |   |   |   |   |
|-----------|---|---|---|---|---|---|
| NM_153346 | 1 | 1 | 1 | 0 | 0 | 0 |
| NM_153347 | 1 | 0 | 1 | 0 | 0 | 0 |
| NM_153350 | 1 | 1 | 1 | 1 | 0 | 0 |
| NM_153353 | 1 | 0 | 1 | 0 | 0 | 0 |
| NM_153354 | 1 | 0 | 1 | 0 | 0 | 0 |
| NM_153355 | 0 | 0 | 0 | 0 | 0 | 1 |
| NM_153356 | 0 | 0 | 0 | 0 | 0 | 1 |
| NM_153357 | 1 | 0 | 1 | 0 | 0 | 0 |
| NM_153358 | 1 | 0 | 1 | 1 | 1 | 1 |
| NM_153359 | 0 | 0 | 1 | 0 | 0 | 0 |
| NM_153360 | 1 | 0 | 1 | 0 | 0 | 0 |
| NM_153361 | 1 | 1 | 1 | 0 | 0 | 0 |
| NM_153362 | 1 | 1 | 1 | 1 | 0 | 0 |
| NM_153363 | 1 | 0 | 1 | 0 | 0 | 0 |
| NM_153364 | 1 | 0 | 1 | 0 | 0 | 0 |
| NM_153365 | 1 | 0 | 1 | 1 | 1 | 1 |
| NM_153367 | 1 | 1 | 1 | 1 | 1 | 1 |
| NM_153368 | 1 | 0 | 1 | 0 | 0 | 1 |
| NM_153369 | 1 | 0 | 1 | 1 | 0 | 0 |
| NM_153370 | 1 | 0 | 1 | 0 | 0 | 1 |
| NM_153371 | 1 | 1 | 1 | 0 | 1 | 1 |
| NM_153373 | 1 | 1 | 1 | 1 | 0 | 0 |
| NM_153374 | 1 | 1 | 1 | 1 | 0 | 0 |
| NM_153375 | 1 | 1 | 1 | 0 | 0 | 0 |
| NM_153376 | 1 | 1 | 1 | 1 | 1 | 1 |
| NM_153378 | 1 | 0 | 1 | 0 | 0 | 1 |
| NM_153379 | 1 | 1 | 1 | 1 | 1 | 1 |
| NM_153380 | 1 | 0 | 1 | 0 | 0 | 0 |
| NM_153425 | 1 | 0 | 1 | 1 | 0 | 0 |
| NM_153426 | 0 | 0 | 1 | 0 | 0 | 0 |
| NM_153437 | 1 | 0 | 1 | 0 | 0 | 0 |
| NM_153442 | 0 | 0 | 0 | 0 | 0 | 1 |
| NM_153443 | 1 | 1 | 1 | 1 | 0 | 0 |
| NM_153445 | 0 | 0 | 0 | 0 | 0 | 1 |
| NM_153446 | 1 | 0 | 0 | 0 | 0 | 0 |
| NM_153449 | 1 | 1 | 1 | 1 | 0 | 0 |
| NM_153450 | 1 | 0 | 1 | 0 | 0 | 0 |
| NM_153451 | 1 | 0 | 1 | 1 | 1 | 1 |
| NM_153453 | 1 | 0 | 1 | 0 | 0 | 0 |
| NM_153454 | 1 | 1 | 1 | 0 | 0 | 0 |
| NM_153455 | 1 | 0 | 0 | 0 | 0 | 1 |
| NM_153456 | 0 | 1 | 0 | 0 | 0 | 1 |
| NM_153460 | 1 | 0 | 0 | 0 | 0 | 1 |
| NM_153461 | 1 | 0 | 1 | 1 | 0 | 1 |
| NM_153462 | 1 | 0 | 1 | 1 | 0 | 1 |
| NM_153463 | 1 | 0 | 1 | 1 | 0 | 0 |
| NM_153477 | 1 | 1 | 1 | 1 | 0 | 1 |
| NM_153478 | 1 | 0 | 0 | 0 | 0 | 0 |
| NM_153481 | 1 | 0 | 1 | 0 | 0 | 0 |
| NM_153486 | 1 | 1 | 1 | 1 | 0 | 0 |
| NM_153487 | 1 | 0 | 1 | 0 | 1 | 1 |
| NM_153488 | 0 | 0 | 1 | 0 | 0 | 0 |

|           |   |   |   |   |   |   |
|-----------|---|---|---|---|---|---|
| NM_153498 | 1 | 0 | 1 | 0 | 0 | 0 |
| NM_153603 | 1 | 0 | 1 | 0 | 0 | 0 |
| NM_153606 | 0 | 0 | 1 | 0 | 0 | 0 |
| NM_153607 | 1 | 1 | 1 | 1 | 0 | 0 |
| NM_153608 | 1 | 0 | 0 | 0 | 0 | 0 |
| NM_153609 | 1 | 1 | 0 | 0 | 0 | 1 |
| NM_153610 | 1 | 0 | 1 | 0 | 0 | 0 |
| NM_153611 | 1 | 1 | 1 | 1 | 1 | 0 |
| NM_153612 | 1 | 0 | 0 | 0 | 0 | 0 |
| NM_153613 | 1 | 0 | 1 | 1 | 0 | 0 |
| NM_153615 | 1 | 1 | 1 | 1 | 0 | 1 |
| NM_153619 | 1 | 1 | 0 | 1 | 0 | 0 |
| NM_153631 | 1 | 0 | 1 | 0 | 0 | 0 |
| NM_153634 | 1 | 1 | 1 | 1 | 0 | 0 |
| NM_153635 | 1 | 0 | 1 | 0 | 0 | 0 |
| NM_153646 | 1 | 1 | 1 | 1 | 1 | 1 |
| NM_153649 | 1 | 0 | 1 | 0 | 0 | 0 |
| NM_153681 | 1 | 0 | 1 | 1 | 0 | 0 |
| NM_153684 | 1 | 1 | 1 | 1 | 0 | 0 |
| NM_153685 | 1 | 1 | 1 | 1 | 0 | 0 |
| NM_153686 | 1 | 1 | 1 | 1 | 0 | 1 |
| NM_153687 | 1 | 1 | 1 | 1 | 0 | 0 |
| NM_153688 | 1 | 0 | 1 | 1 | 0 | 0 |
| NM_153689 | 1 | 1 | 1 | 1 | 0 | 0 |
| NM_153690 | 1 | 0 | 1 | 1 | 1 | 1 |
| NM_153691 | 1 | 0 | 1 | 0 | 0 | 0 |
| NM_153692 | 1 | 1 | 1 | 1 | 0 | 0 |
| NM_153693 | 1 | 1 | 1 | 0 | 0 | 1 |
| NM_153694 | 1 | 0 | 1 | 0 | 0 | 0 |
| NM_153695 | 1 | 0 | 1 | 0 | 0 | 0 |
| NM_153696 | 1 | 0 | 1 | 0 | 0 | 0 |
| NM_153697 | 1 | 0 | 1 | 0 | 0 | 0 |
| NM_153700 | 1 | 0 | 1 | 0 | 0 | 0 |
| NM_153701 | 1 | 0 | 1 | 0 | 0 | 1 |
| NM_153702 | 1 | 1 | 1 | 1 | 1 | 1 |
| NM_153703 | 1 | 0 | 1 | 1 | 1 | 0 |
| NM_153704 | 1 | 0 | 1 | 0 | 0 | 0 |
| NM_153706 | 1 | 1 | 1 | 0 | 0 | 0 |
| NM_153707 | 1 | 0 | 1 | 1 | 0 | 0 |
| NM_153708 | 0 | 0 | 0 | 0 | 0 | 1 |
| NM_153709 | 1 | 0 | 0 | 0 | 0 | 1 |
| NM_153711 | 1 | 0 | 1 | 0 | 0 | 1 |
| NM_153712 | 1 | 0 | 1 | 0 | 0 | 0 |
| NM_153713 | 1 | 1 | 1 | 1 | 1 | 1 |
| NM_153715 | 1 | 0 | 1 | 0 | 0 | 0 |
| NM_153717 | 1 | 1 | 1 | 0 | 0 | 0 |
| NM_153742 | 1 | 1 | 1 | 1 | 0 | 0 |
| NM_153750 | 1 | 0 | 1 | 0 | 0 | 0 |
| NM_153751 | 1 | 0 | 0 | 0 | 0 | 0 |
| NM_153753 | 1 | 0 | 1 | 0 | 0 | 0 |
| NM_153754 | 1 | 1 | 1 | 1 | 0 | 0 |
| NM_153755 | 0 | 0 | 0 | 0 | 0 | 1 |

|           |   |   |   |   |   |   |
|-----------|---|---|---|---|---|---|
| NM_153756 | 1 | 0 | 1 | 0 | 0 | 0 |
| NM_153757 | 1 | 1 | 1 | 1 | 1 | 1 |
| NM_153759 | 1 | 1 | 1 | 1 | 1 | 0 |
| NM_153763 | 1 | 1 | 1 | 1 | 1 | 1 |
| NM_153765 | 1 | 0 | 1 | 1 | 1 | 0 |
| NM_153773 | 1 | 1 | 1 | 0 | 0 | 0 |
| NM_153809 | 1 | 1 | 1 | 0 | 0 | 0 |
| NM_153810 | 1 | 1 | 1 | 1 | 0 | 0 |
| NM_153811 | 1 | 1 | 1 | 1 | 0 | 0 |
| NM_153812 | 1 | 1 | 1 | 1 | 0 | 1 |
| NM_153813 | 1 | 0 | 1 | 0 | 0 | 0 |
| NM_153822 | 0 | 1 | 1 | 1 | 0 | 0 |
| NM_153823 | 1 | 1 | 1 | 1 | 0 | 0 |
| NM_153825 | 1 | 1 | 1 | 0 | 1 | 1 |
| NM_153827 | 1 | 0 | 0 | 0 | 0 | 1 |
| NM_153828 | 1 | 0 | 1 | 1 | 0 | 0 |
| NM_153831 | 1 | 0 | 1 | 0 | 0 | 1 |
| NM_153832 | 1 | 1 | 1 | 1 | 1 | 1 |
| NM_153833 | 1 | 1 | 1 | 1 | 0 | 0 |
| NM_153835 | 1 | 0 | 1 | 0 | 0 | 0 |
| NM_153836 | 1 | 1 | 1 | 1 | 0 | 1 |
| NM_153837 | 1 | 1 | 1 | 1 | 0 | 0 |
| NM_153840 | 0 | 0 | 0 | 0 | 0 | 1 |
| NM_170589 | 1 | 0 | 1 | 0 | 1 | 1 |
| NM_170601 | 1 | 0 | 1 | 1 | 0 | 0 |
| NM_170604 | 1 | 1 | 0 | 0 | 0 | 1 |
| NM_170605 | 1 | 1 | 1 | 1 | 0 | 0 |
| NM_170606 | 1 | 0 | 1 | 0 | 0 | 0 |
| NM_170607 | 1 | 1 | 1 | 1 | 0 | 0 |
| NM_170609 | 1 | 0 | 1 | 0 | 0 | 0 |
| NM_170610 | 0 | 1 | 0 | 0 | 0 | 0 |
| NM_170662 | 1 | 0 | 1 | 0 | 0 | 0 |
| NM_170663 | 1 | 0 | 0 | 0 | 0 | 1 |
| NM_170664 | 1 | 0 | 1 | 0 | 0 | 1 |
| NM_170665 | 1 | 0 | 1 | 1 | 0 | 0 |
| NM_170672 | 1 | 1 | 1 | 1 | 0 | 0 |
| NM_170677 | 1 | 1 | 1 | 1 | 0 | 0 |
| NM_170678 | 1 | 0 | 0 | 0 | 0 | 0 |
| NM_170679 | 1 | 0 | 1 | 0 | 0 | 0 |
| NM_170681 | 1 | 0 | 1 | 0 | 0 | 0 |
| NM_170685 | 1 | 1 | 1 | 1 | 0 | 0 |
| NM_170694 | 1 | 0 | 1 | 0 | 0 | 0 |
| NM_170695 | 1 | 0 | 1 | 1 | 0 | 0 |
| NM_170696 | 1 | 1 | 0 | 0 | 0 | 1 |
| NM_170698 | 1 | 1 | 1 | 1 | 0 | 0 |
| NM_170699 | 1 | 1 | 1 | 1 | 1 | 1 |
| NM_170705 | 1 | 0 | 1 | 0 | 0 | 1 |
| NM_170706 | 1 | 0 | 1 | 0 | 0 | 0 |
| NM_170707 | 1 | 1 | 1 | 1 | 0 | 0 |
| NM_170710 | 1 | 0 | 1 | 0 | 0 | 1 |
| NM_170711 | 1 | 1 | 1 | 1 | 0 | 0 |
| NM_170715 | 1 | 0 | 1 | 0 | 1 | 0 |

|           |   |   |   |   |   |   |
|-----------|---|---|---|---|---|---|
| NM_170719 | 1 | 0 | 1 | 0 | 0 | 0 |
| NM_170721 | 1 | 0 | 1 | 0 | 0 | 0 |
| NM_170722 | 1 | 1 | 1 | 1 | 0 | 0 |
| NM_170724 | 1 | 1 | 1 | 1 | 0 | 1 |
| NM_170725 | 1 | 0 | 1 | 0 | 0 | 0 |
| NM_170726 | 1 | 1 | 1 | 1 | 1 | 1 |
| NM_170734 | 1 | 0 | 1 | 0 | 0 | 0 |
| NM_170736 | 1 | 1 | 1 | 1 | 0 | 0 |
| NM_170738 | 1 | 0 | 1 | 1 | 0 | 1 |
| NM_170742 | 0 | 0 | 0 | 1 | 0 | 0 |
| NM_170743 | 1 | 1 | 1 | 1 | 0 | 1 |
| NM_170744 | 1 | 1 | 1 | 1 | 1 | 0 |
| NM_170745 | 1 | 0 | 1 | 0 | 0 | 0 |
| NM_170746 | 1 | 1 | 1 | 1 | 0 | 0 |
| NM_170750 | 1 | 0 | 1 | 0 | 0 | 0 |
| NM_170753 | 1 | 0 | 1 | 0 | 0 | 0 |
| NM_170754 | 1 | 1 | 1 | 1 | 0 | 0 |
| NM_170768 | 1 | 0 | 0 | 0 | 0 | 0 |
| NM_170774 | 1 | 0 | 1 | 1 | 0 | 0 |
| NM_170776 | 1 | 1 | 1 | 1 | 0 | 1 |
| NM_170780 | 1 | 0 | 1 | 0 | 0 | 0 |
| NM_170782 | 1 | 0 | 1 | 1 | 1 | 1 |
| NM_170783 | 1 | 1 | 1 | 1 | 0 | 1 |
| NM_170784 | 1 | 0 | 1 | 0 | 0 | 0 |
| NM_171825 | 1 | 0 | 0 | 0 | 0 | 1 |
| NM_171827 | 1 | 0 | 1 | 1 | 0 | 0 |
| NM_171846 | 1 | 1 | 1 | 1 | 0 | 0 |
| NM_171982 | 1 | 0 | 1 | 0 | 0 | 0 |
| NM_171997 | 1 | 0 | 1 | 1 | 0 | 0 |
| NM_171998 | 1 | 1 | 1 | 1 | 0 | 0 |
| NM_171999 | 1 | 0 | 1 | 0 | 0 | 0 |
| NM_172002 | 1 | 1 | 1 | 1 | 0 | 0 |
| NM_172003 | 1 | 1 | 1 | 1 | 0 | 0 |
| NM_172004 | 1 | 0 | 1 | 1 | 0 | 0 |
| NM_172005 | 1 | 0 | 1 | 0 | 0 | 0 |
| NM_172014 | 1 | 1 | 1 | 1 | 1 | 1 |
| NM_172020 | 1 | 0 | 1 | 0 | 0 | 0 |
| NM_172025 | 1 | 0 | 1 | 0 | 0 | 0 |
| NM_172037 | 1 | 1 | 0 | 0 | 0 | 0 |
| NM_172056 | 1 | 0 | 1 | 1 | 0 | 0 |
| NM_172070 | 1 | 0 | 1 | 0 | 0 | 0 |
| NM_172087 | 1 | 1 | 1 | 1 | 0 | 0 |
| NM_172097 | 1 | 0 | 1 | 1 | 0 | 0 |
| NM_172098 | 1 | 1 | 1 | 1 | 1 | 1 |
| NM_172100 | 1 | 0 | 1 | 0 | 0 | 0 |
| NM_172102 | 1 | 0 | 1 | 1 | 0 | 0 |
| NM_172104 | 1 | 0 | 0 | 0 | 0 | 1 |
| NM_172108 | 0 | 0 | 0 | 0 | 0 | 1 |
| NM_172109 | 1 | 0 | 1 | 0 | 0 | 0 |
| NM_172110 | 1 | 0 | 1 | 0 | 0 | 0 |
| NM_172115 | 1 | 1 | 1 | 1 | 0 | 1 |
| NM_172128 | 1 | 0 | 1 | 1 | 0 | 0 |



|           |   |   |   |   |   |   |
|-----------|---|---|---|---|---|---|
| NM_172131 | 0 | 1 | 0 | 0 | 0 | 1 |
| NM_172136 | 1 | 0 | 1 | 1 | 0 | 0 |
| NM_172138 | 1 | 0 | 1 | 0 | 0 | 0 |
| NM_172139 | 1 | 0 | 1 | 0 | 0 | 0 |
| NM_172140 | 1 | 0 | 1 | 1 | 0 | 0 |
| NM_172160 | 1 | 1 | 1 | 1 | 0 | 0 |
| NM_172163 | 1 | 0 | 0 | 0 | 0 | 1 |
| NM_172164 | 1 | 1 | 1 | 1 | 0 | 0 |
| NM_172165 | 1 | 1 | 1 | 1 | 1 | 1 |
| NM_172177 | 1 | 0 | 1 | 0 | 0 | 1 |
| NM_172193 | 1 | 0 | 1 | 1 | 0 | 0 |
| NM_172196 | 1 | 1 | 1 | 1 | 0 | 0 |
| NM_172199 | 1 | 1 | 1 | 0 | 0 | 0 |
| NM_172201 | 1 | 0 | 1 | 0 | 0 | 1 |
| NM_172207 | 0 | 0 | 0 | 0 | 0 | 1 |
| NM_172208 | 1 | 1 | 1 | 1 | 0 | 0 |
| NM_172209 | 1 | 0 | 1 | 1 | 0 | 0 |
| NM_172210 | 1 | 0 | 1 | 1 | 0 | 0 |
| NM_172211 | 1 | 1 | 1 | 1 | 0 | 0 |
| NM_172212 | 1 | 0 | 1 | 1 | 0 | 0 |
| NM_172213 | 1 | 1 | 1 | 1 | 0 | 1 |
| NM_172214 | 1 | 0 | 1 | 1 | 1 | 1 |
| NM_172215 | 1 | 0 | 1 | 0 | 1 | 0 |
| NM_172217 | 1 | 1 | 1 | 1 | 1 | 0 |
| NM_172218 | 1 | 1 | 1 | 1 | 0 | 1 |
| NM_172225 | 1 | 1 | 0 | 0 | 0 | 0 |
| NM_172234 | 1 | 1 | 1 | 0 | 0 | 1 |
| NM_172236 | 0 | 0 | 0 | 0 | 0 | 1 |
| NM_172238 | 1 | 0 | 1 | 1 | 0 | 1 |
| NM_172239 | 1 | 0 | 1 | 0 | 0 | 0 |
| NM_172240 | 1 | 0 | 1 | 0 | 0 | 0 |
| NM_172241 | 1 | 0 | 0 | 0 | 0 | 1 |
| NM_172242 | 1 | 1 | 1 | 1 | 0 | 0 |
| NM_172244 | 1 | 0 | 1 | 0 | 0 | 0 |
| NM_172245 | 1 | 0 | 1 | 0 | 0 | 0 |
| NM_172246 | 1 | 0 | 1 | 1 | 1 | 1 |
| NM_172247 | 1 | 0 | 1 | 1 | 1 | 1 |
| NM_172248 | 1 | 0 | 1 | 0 | 1 | 1 |
| NM_172249 | 1 | 0 | 1 | 1 | 0 | 0 |
| NM_172250 | 1 | 1 | 1 | 1 | 0 | 0 |
| NM_172251 | 1 | 0 | 1 | 0 | 0 | 0 |
| NM_172311 | 1 | 0 | 1 | 0 | 0 | 1 |
| NM_172318 | 1 | 1 | 1 | 1 | 0 | 0 |
| NM_172341 | 1 | 0 | 1 | 1 | 0 | 0 |
| NM_172344 | 0 | 0 | 0 | 0 | 0 | 1 |
| NM_172345 | 1 | 1 | 1 | 1 | 0 | 0 |
| NM_172346 | 1 | 0 | 1 | 1 | 0 | 0 |
| NM_172347 | 1 | 0 | 1 | 0 | 0 | 1 |
| NM_172349 | 1 | 0 | 1 | 0 | 1 | 1 |
| NM_172350 | 1 | 1 | 1 | 1 | 0 | 1 |
| NM_172362 | 1 | 0 | 1 | 0 | 0 | 0 |
| NM_172363 | 1 | 0 | 1 | 0 | 1 | 1 |

|           |   |   |   |   |   |   |
|-----------|---|---|---|---|---|---|
| NM_172364 | 1 | 1 | 1 | 1 | 1 | 1 |
| NM_172365 | 1 | 1 | 1 | 1 | 0 | 0 |
| NM_172366 | 1 | 0 | 1 | 0 | 0 | 1 |
| NM_172367 | 1 | 1 | 1 | 1 | 0 | 0 |
| NM_172368 | 1 | 0 | 0 | 0 | 0 | 1 |
| NM_172369 | 1 | 1 | 1 | 0 | 0 | 1 |
| NM_172370 | 1 | 0 | 1 | 0 | 0 | 0 |
| NM_172373 | 1 | 0 | 1 | 0 | 0 | 1 |
| NM_172376 | 0 | 1 | 0 | 0 | 0 | 1 |
| NM_172386 | 1 | 0 | 1 | 0 | 0 | 1 |
| NM_172390 | 1 | 0 | 1 | 0 | 0 | 0 |
| NM_173039 | 1 | 0 | 1 | 0 | 0 | 0 |
| NM_173043 | 1 | 0 | 1 | 0 | 0 | 0 |
| NM_173044 | 1 | 1 | 1 | 1 | 0 | 0 |
| NM_173050 | 1 | 1 | 1 | 1 | 0 | 0 |
| NM_173059 | 1 | 0 | 1 | 0 | 0 | 0 |
| NM_173060 | 1 | 0 | 1 | 0 | 1 | 0 |
| NM_173061 | 1 | 0 | 1 | 0 | 0 | 1 |
| NM_173074 | 1 | 0 | 1 | 0 | 0 | 0 |
| NM_173076 | 1 | 0 | 0 | 0 | 0 | 0 |
| NM_173077 | 1 | 1 | 0 | 0 | 0 | 1 |
| NM_173078 | 1 | 1 | 1 | 1 | 0 | 0 |
| NM_173079 | 1 | 0 | 1 | 0 | 1 | 0 |
| NM_173080 | 1 | 0 | 1 | 0 | 0 | 0 |
| NM_173081 | 1 | 0 | 1 | 0 | 1 | 0 |
| NM_173082 | 1 | 0 | 1 | 0 | 0 | 0 |
| NM_173083 | 1 | 0 | 1 | 0 | 0 | 0 |
| NM_173084 | 1 | 0 | 1 | 0 | 0 | 1 |
| NM_173086 | 1 | 1 | 1 | 1 | 0 | 0 |
| NM_173087 | 1 | 0 | 1 | 1 | 0 | 0 |
| NM_173092 | 1 | 0 | 0 | 0 | 0 | 1 |
| NM_173158 | 1 | 0 | 1 | 0 | 0 | 0 |
| NM_173161 | 1 | 0 | 1 | 0 | 1 | 0 |
| NM_173164 | 1 | 0 | 1 | 0 | 0 | 0 |
| NM_173165 | 1 | 0 | 1 | 0 | 1 | 0 |
| NM_173167 | 1 | 0 | 1 | 0 | 0 | 1 |
| NM_173168 | 1 | 1 | 1 | 1 | 0 | 0 |
| NM_173172 | 1 | 0 | 1 | 0 | 0 | 1 |
| NM_173174 | 1 | 1 | 1 | 1 | 1 | 1 |
| NM_173178 | 1 | 1 | 1 | 1 | 0 | 1 |
| NM_173193 | 1 | 0 | 1 | 1 | 0 | 0 |
| NM_173197 | 1 | 0 | 1 | 0 | 0 | 0 |
| NM_173198 | 1 | 1 | 1 | 1 | 0 | 0 |
| NM_173199 | 1 | 1 | 1 | 1 | 0 | 0 |
| NM_173201 | 1 | 0 | 1 | 1 | 0 | 0 |
| NM_173215 | 1 | 0 | 1 | 1 | 0 | 1 |
| NM_173216 | 1 | 0 | 1 | 1 | 1 | 1 |
| NM_173341 | 1 | 1 | 1 | 1 | 0 | 0 |
| NM_173344 | 1 | 0 | 1 | 1 | 0 | 0 |
| NM_173352 | 1 | 0 | 1 | 0 | 0 | 1 |
| NM_173353 | 0 | 0 | 0 | 0 | 0 | 1 |
| NM_173354 | 1 | 0 | 1 | 0 | 1 | 1 |

|           |   |   |   |   |   |   |
|-----------|---|---|---|---|---|---|
| NM_173355 | 0 | 1 | 0 | 0 | 0 | 0 |
| NM_173357 | 1 | 1 | 1 | 1 | 0 | 0 |
| NM_173358 | 1 | 0 | 1 | 1 | 0 | 1 |
| NM_173359 | 1 | 0 | 1 | 0 | 1 | 1 |
| NM_173362 | 1 | 0 | 1 | 0 | 0 | 1 |
| NM_173452 | 1 | 1 | 1 | 1 | 0 | 0 |
| NM_173459 | 1 | 0 | 1 | 0 | 0 | 0 |
| NM_173462 | 1 | 1 | 1 | 1 | 0 | 1 |
| NM_173463 | 1 | 0 | 1 | 0 | 0 | 0 |
| NM_173464 | 1 | 0 | 1 | 0 | 0 | 0 |
| NM_173465 | 1 | 1 | 1 | 1 | 0 | 0 |
| NM_173466 | 1 | 0 | 1 | 0 | 0 | 0 |
| NM_173468 | 1 | 0 | 1 | 1 | 0 | 0 |
| NM_173469 | 1 | 0 | 1 | 0 | 0 | 0 |
| NM_173470 | 1 | 0 | 1 | 1 | 0 | 1 |
| NM_173471 | 1 | 0 | 1 | 1 | 1 | 1 |
| NM_173472 | 1 | 0 | 0 | 0 | 0 | 0 |
| NM_173473 | 1 | 1 | 1 | 1 | 0 | 0 |
| NM_173474 | 1 | 1 | 1 | 1 | 0 | 1 |
| NM_173475 | 1 | 0 | 1 | 0 | 0 | 0 |
| NM_173476 | 1 | 0 | 1 | 0 | 0 | 0 |
| NM_173477 | 1 | 0 | 1 | 0 | 0 | 0 |
| NM_173478 | 1 | 0 | 0 | 0 | 0 | 1 |
| NM_173479 | 1 | 1 | 1 | 1 | 0 | 0 |
| NM_173480 | 1 | 0 | 1 | 1 | 0 | 0 |
| NM_173481 | 1 | 0 | 1 | 0 | 0 | 0 |
| NM_173482 | 1 | 0 | 1 | 1 | 0 | 0 |
| NM_173483 | 1 | 0 | 0 | 0 | 0 | 1 |
| NM_173484 | 1 | 1 | 1 | 1 | 0 | 1 |
| NM_173485 | 1 | 1 | 1 | 1 | 0 | 0 |
| NM_173487 | 1 | 1 | 1 | 0 | 0 | 0 |
| NM_173490 | 1 | 0 | 1 | 0 | 0 | 1 |
| NM_173491 | 1 | 0 | 1 | 0 | 0 | 0 |
| NM_173492 | 1 | 0 | 1 | 0 | 0 | 0 |
| NM_173496 | 1 | 1 | 1 | 1 | 0 | 0 |
| NM_173497 | 1 | 1 | 1 | 0 | 0 | 0 |
| NM_173498 | 1 | 1 | 1 | 1 | 0 | 0 |
| NM_173500 | 1 | 1 | 1 | 1 | 0 | 1 |
| NM_173501 | 1 | 1 | 1 | 1 | 0 | 1 |
| NM_173502 | 1 | 1 | 1 | 1 | 0 | 0 |
| NM_173507 | 1 | 1 | 1 | 1 | 0 | 0 |
| NM_173508 | 1 | 1 | 1 | 1 | 0 | 0 |
| NM_173509 | 1 | 0 | 0 | 0 | 0 | 1 |
| NM_173510 | 1 | 0 | 1 | 0 | 0 | 1 |
| NM_173511 | 1 | 1 | 1 | 1 | 0 | 0 |
| NM_173512 | 1 | 0 | 1 | 0 | 0 | 1 |
| NM_173513 | 1 | 0 | 1 | 1 | 0 | 0 |
| NM_173514 | 1 | 0 | 1 | 0 | 0 | 0 |
| NM_173515 | 1 | 1 | 1 | 1 | 0 | 0 |
| NM_173516 | 1 | 0 | 1 | 1 | 0 | 0 |
| NM_173517 | 1 | 0 | 1 | 0 | 0 | 1 |
| NM_173519 | 1 | 0 | 1 | 0 | 0 | 0 |

|           |   |   |   |   |   |   |
|-----------|---|---|---|---|---|---|
| NM_173520 | 1 | 0 | 1 | 1 | 0 | 0 |
| NM_173521 | 1 | 0 | 1 | 0 | 0 | 0 |
| NM_173522 | 1 | 0 | 1 | 0 | 0 | 0 |
| NM_173524 | 1 | 1 | 1 | 0 | 0 | 0 |
| NM_173525 | 1 | 0 | 1 | 0 | 0 | 0 |
| NM_173527 | 1 | 1 | 1 | 1 | 1 | 1 |
| NM_173528 | 1 | 1 | 1 | 1 | 0 | 1 |
| NM_173529 | 1 | 0 | 1 | 0 | 0 | 0 |
| NM_173530 | 1 | 0 | 1 | 1 | 0 | 0 |
| NM_173531 | 1 | 0 | 1 | 0 | 0 | 1 |
| NM_173532 | 1 | 1 | 1 | 1 | 0 | 0 |
| NM_173535 | 1 | 0 | 1 | 0 | 0 | 0 |
| NM_173538 | 1 | 0 | 0 | 1 | 0 | 0 |
| NM_173539 | 1 | 1 | 1 | 0 | 1 | 0 |
| NM_173540 | 1 | 0 | 1 | 1 | 0 | 0 |
| NM_173541 | 1 | 0 | 1 | 0 | 0 | 1 |
| NM_173542 | 1 | 0 | 1 | 1 | 0 | 0 |
| NM_173543 | 1 | 1 | 1 | 0 | 0 | 0 |
| NM_173544 | 1 | 0 | 1 | 1 | 1 | 1 |
| NM_173545 | 1 | 0 | 1 | 0 | 1 | 1 |
| NM_173546 | 1 | 1 | 1 | 1 | 0 | 0 |
| NM_173547 | 1 | 0 | 1 | 0 | 0 | 1 |
| NM_173548 | 1 | 0 | 1 | 1 | 0 | 1 |
| NM_173549 | 1 | 0 | 1 | 0 | 0 | 0 |
| NM_173550 | 0 | 1 | 0 | 0 | 0 | 0 |
| NM_173551 | 1 | 1 | 1 | 1 | 0 | 0 |
| NM_173552 | 1 | 0 | 1 | 1 | 0 | 0 |
| NM_173555 | 1 | 1 | 1 | 1 | 0 | 0 |
| NM_173558 | 1 | 1 | 1 | 1 | 0 | 0 |
| NM_173559 | 1 | 0 | 1 | 1 | 1 | 1 |
| NM_173560 | 0 | 0 | 0 | 0 | 0 | 1 |
| NM_173561 | 1 | 0 | 1 | 1 | 0 | 0 |
| NM_173562 | 1 | 0 | 1 | 1 | 0 | 0 |
| NM_173566 | 1 | 1 | 1 | 1 | 0 | 0 |
| NM_173567 | 1 | 0 | 1 | 0 | 0 | 1 |
| NM_173568 | 1 | 1 | 1 | 1 | 0 | 0 |
| NM_173570 | 1 | 0 | 1 | 1 | 1 | 1 |
| NM_173571 | 0 | 0 | 0 | 0 | 0 | 1 |
| NM_173572 | 1 | 0 | 1 | 1 | 0 | 0 |
| NM_173573 | 1 | 0 | 1 | 0 | 0 | 0 |
| NM_173574 | 1 | 1 | 1 | 1 | 0 | 1 |
| NM_173575 | 1 | 1 | 1 | 1 | 0 | 1 |
| NM_173579 | 1 | 0 | 1 | 1 | 0 | 0 |
| NM_173581 | 1 | 0 | 1 | 0 | 0 | 1 |
| NM_173582 | 1 | 0 | 1 | 1 | 0 | 1 |
| NM_173583 | 1 | 1 | 1 | 1 | 0 | 0 |
| NM_173584 | 1 | 0 | 1 | 1 | 0 | 0 |
| NM_173586 | 0 | 0 | 0 | 0 | 0 | 1 |
| NM_173588 | 1 | 1 | 1 | 1 | 0 | 0 |
| NM_173589 | 1 | 1 | 1 | 1 | 0 | 0 |
| NM_173590 | 1 | 0 | 1 | 1 | 0 | 0 |
| NM_173591 | 1 | 0 | 1 | 1 | 0 | 0 |

|           |   |   |   |   |   |   |
|-----------|---|---|---|---|---|---|
| NM_173593 | 1 | 0 | 1 | 0 | 0 | 0 |
| NM_173596 | 1 | 0 | 1 | 1 | 0 | 0 |
| NM_173597 | 0 | 1 | 0 | 0 | 0 | 0 |
| NM_173599 | 0 | 0 | 0 | 0 | 0 | 1 |
| NM_173600 | 1 | 0 | 0 | 0 | 0 | 1 |
| NM_173602 | 1 | 0 | 0 | 0 | 0 | 0 |
| NM_173605 | 1 | 0 | 1 | 1 | 0 | 1 |
| NM_173607 | 1 | 1 | 1 | 1 | 1 | 0 |
| NM_173608 | 1 | 0 | 1 | 0 | 0 | 1 |
| NM_173609 | 1 | 1 | 1 | 1 | 0 | 0 |
| NM_173610 | 1 | 0 | 0 | 0 | 0 | 0 |
| NM_173611 | 1 | 0 | 1 | 0 | 0 | 1 |
| NM_173613 | 1 | 0 | 0 | 0 | 0 | 1 |
| NM_173614 | 1 | 0 | 1 | 0 | 0 | 1 |
| NM_173616 | 1 | 0 | 1 | 0 | 0 | 0 |
| NM_173617 | 1 | 0 | 1 | 0 | 0 | 1 |
| NM_173618 | 1 | 0 | 1 | 0 | 1 | 0 |
| NM_173619 | 1 | 0 | 1 | 1 | 0 | 0 |
| NM_173620 | 1 | 0 | 1 | 1 | 0 | 1 |
| NM_173621 | 1 | 0 | 1 | 1 | 0 | 1 |
| NM_173622 | 1 | 0 | 1 | 1 | 0 | 0 |
| NM_173623 | 0 | 0 | 0 | 0 | 0 | 1 |
| NM_173624 | 1 | 0 | 1 | 0 | 0 | 0 |
| NM_173625 | 1 | 1 | 1 | 1 | 0 | 0 |
| NM_173626 | 1 | 1 | 1 | 1 | 1 | 1 |
| NM_173627 | 1 | 0 | 1 | 0 | 0 | 0 |
| NM_173628 | 1 | 0 | 1 | 0 | 0 | 0 |
| NM_173629 | 1 | 0 | 1 | 0 | 0 | 0 |
| NM_173630 | 1 | 0 | 1 | 1 | 0 | 0 |
| NM_173631 | 1 | 0 | 1 | 0 | 0 | 0 |
| NM_173632 | 1 | 0 | 1 | 0 | 1 | 0 |
| NM_173633 | 1 | 0 | 0 | 1 | 0 | 0 |
| NM_173635 | 1 | 0 | 0 | 0 | 0 | 1 |
| NM_173636 | 1 | 0 | 0 | 0 | 0 | 0 |
| NM_173637 | 1 | 1 | 1 | 0 | 1 | 1 |
| NM_173638 | 1 | 0 | 1 | 0 | 0 | 0 |
| NM_173641 | 1 | 0 | 1 | 0 | 0 | 1 |
| NM_173643 | 1 | 0 | 0 | 0 | 1 | 1 |
| NM_173644 | 1 | 0 | 1 | 0 | 0 | 1 |
| NM_173646 | 1 | 0 | 1 | 1 | 0 | 0 |
| NM_173647 | 1 | 1 | 1 | 1 | 0 | 0 |
| NM_173648 | 1 | 1 | 1 | 1 | 0 | 0 |
| NM_173650 | 1 | 0 | 1 | 0 | 0 | 0 |
| NM_173652 | 1 | 1 | 1 | 1 | 1 | 1 |
| NM_173653 | 1 | 0 | 1 | 1 | 0 | 1 |
| NM_173656 | 1 | 1 | 1 | 1 | 1 | 0 |
| NM_173657 | 1 | 1 | 1 | 1 | 1 | 1 |
| NM_173658 | 1 | 0 | 1 | 0 | 1 | 0 |
| NM_173659 | 1 | 0 | 1 | 1 | 0 | 0 |
| NM_173660 | 1 | 0 | 1 | 0 | 0 | 0 |
| NM_173662 | 1 | 1 | 1 | 1 | 1 | 1 |
| NM_173663 | 1 | 0 | 1 | 0 | 0 | 0 |

|           |   |   |   |   |   |   |
|-----------|---|---|---|---|---|---|
| NM_173665 | 1 | 0 | 1 | 1 | 0 | 1 |
| NM_173666 | 1 | 0 | 1 | 0 | 0 | 0 |
| NM_173667 | 1 | 1 | 1 | 1 | 0 | 0 |
| NM_173668 | 1 | 0 | 1 | 0 | 0 | 0 |
| NM_173670 | 1 | 0 | 1 | 0 | 0 | 0 |
| NM_173672 | 1 | 0 | 1 | 0 | 0 | 0 |
| NM_173674 | 1 | 0 | 1 | 0 | 0 | 0 |
| NM_173676 | 1 | 0 | 1 | 0 | 0 | 0 |
| NM_173677 | 1 | 0 | 1 | 1 | 1 | 0 |
| NM_173678 | 1 | 0 | 1 | 0 | 0 | 0 |
| NM_173679 | 1 | 0 | 1 | 1 | 0 | 0 |
| NM_173680 | 1 | 1 | 1 | 1 | 0 | 0 |
| NM_173681 | 1 | 0 | 1 | 0 | 0 | 0 |
| NM_173682 | 1 | 0 | 1 | 0 | 0 | 0 |
| NM_173683 | 1 | 1 | 1 | 1 | 1 | 1 |
| NM_173685 | 1 | 1 | 1 | 1 | 0 | 0 |
| NM_173686 | 1 | 1 | 1 | 0 | 1 | 1 |
| NM_173687 | 1 | 0 | 1 | 0 | 0 | 0 |
| NM_173689 | 1 | 0 | 0 | 0 | 0 | 1 |
| NM_173690 | 1 | 1 | 1 | 1 | 0 | 0 |
| NM_173691 | 1 | 1 | 1 | 1 | 0 | 0 |
| NM_173694 | 1 | 0 | 1 | 0 | 0 | 0 |
| NM_173695 | 1 | 0 | 1 | 0 | 0 | 0 |
| NM_173700 | 1 | 1 | 1 | 1 | 1 | 1 |
| NM_173702 | 1 | 1 | 1 | 0 | 1 | 1 |
| NM_173703 | 1 | 1 | 1 | 1 | 1 | 0 |
| NM_173704 | 1 | 0 | 1 | 0 | 0 | 0 |
| NM_173705 | 1 | 0 | 1 | 0 | 0 | 0 |
| NM_173708 | 1 | 0 | 1 | 0 | 0 | 0 |
| NM_173709 | 1 | 0 | 1 | 0 | 1 | 0 |
| NM_173710 | 1 | 0 | 1 | 0 | 0 | 1 |
| NM_173711 | 1 | 0 | 1 | 0 | 0 | 0 |
| NM_173712 | 1 | 0 | 1 | 0 | 0 | 0 |
| NM_173713 | 1 | 0 | 1 | 0 | 0 | 0 |
| NM_173714 | 1 | 0 | 1 | 0 | 0 | 0 |
| NM_173727 | 1 | 1 | 1 | 1 | 0 | 0 |
| NM_173728 | 1 | 0 | 1 | 0 | 0 | 0 |
| NM_173791 | 1 | 1 | 1 | 1 | 0 | 0 |
| NM_173793 | 1 | 0 | 1 | 0 | 1 | 0 |
| NM_173794 | 1 | 0 | 1 | 1 | 0 | 0 |
| NM_173795 | 1 | 1 | 1 | 1 | 0 | 0 |
| NM_173796 | 1 | 0 | 1 | 0 | 0 | 0 |
| NM_173797 | 1 | 0 | 1 | 0 | 1 | 0 |
| NM_173798 | 1 | 1 | 1 | 1 | 0 | 0 |
| NM_173799 | 1 | 1 | 1 | 1 | 0 | 0 |
| NM_173801 | 1 | 0 | 1 | 1 | 0 | 0 |
| NM_173802 | 1 | 0 | 1 | 0 | 0 | 1 |
| NM_173804 | 1 | 1 | 1 | 0 | 0 | 0 |
| NM_173805 | 1 | 1 | 1 | 1 | 0 | 1 |
| NM_173806 | 0 | 0 | 0 | 0 | 0 | 1 |
| NM_173807 | 1 | 1 | 1 | 1 | 0 | 0 |
| NM_173809 | 1 | 1 | 1 | 1 | 0 | 0 |

|           |   |   |   |   |   |   |
|-----------|---|---|---|---|---|---|
| NM_173810 | 1 | 0 | 1 | 0 | 1 | 1 |
| NM_173811 | 0 | 0 | 1 | 0 | 0 | 0 |
| NM_173812 | 1 | 0 | 1 | 0 | 0 | 0 |
| NM_173813 | 1 | 0 | 1 | 0 | 0 | 0 |
| NM_173815 | 1 | 1 | 1 | 1 | 0 | 1 |
| NM_173820 | 0 | 0 | 0 | 0 | 0 | 1 |
| NM_173821 | 1 | 0 | 1 | 0 | 0 | 0 |
| NM_173822 | 1 | 1 | 1 | 1 | 0 | 0 |
| NM_173824 | 1 | 0 | 1 | 0 | 0 | 0 |
| NM_173825 | 1 | 0 | 0 | 0 | 0 | 1 |
| NM_173826 | 1 | 0 | 1 | 0 | 1 | 1 |
| NM_173827 | 1 | 1 | 1 | 1 | 1 | 1 |
| NM_173828 | 1 | 0 | 1 | 0 | 0 | 0 |
| NM_173829 | 1 | 0 | 1 | 0 | 1 | 0 |
| NM_173830 | 1 | 0 | 1 | 0 | 0 | 0 |
| NM_173831 | 1 | 0 | 1 | 0 | 0 | 1 |
| NM_173832 | 1 | 0 | 1 | 0 | 0 | 0 |
| NM_173833 | 1 | 0 | 1 | 0 | 1 | 1 |
| NM_173834 | 1 | 1 | 1 | 1 | 0 | 0 |
| NM_173847 | 0 | 0 | 0 | 0 | 0 | 1 |
| NM_173848 | 0 | 0 | 1 | 0 | 0 | 0 |
| NM_173849 | 1 | 1 | 1 | 1 | 1 | 1 |
| NM_173850 | 1 | 0 | 1 | 0 | 0 | 1 |
| NM_173851 | 1 | 0 | 1 | 0 | 0 | 0 |
| NM_173852 | 1 | 1 | 1 | 0 | 0 | 0 |
| NM_173853 | 1 | 0 | 1 | 1 | 1 | 1 |
| NM_173854 | 1 | 0 | 1 | 1 | 0 | 0 |
| NM_173855 | 1 | 1 | 1 | 1 | 0 | 1 |
| NM_173856 | 1 | 1 | 0 | 0 | 0 | 0 |
| NM_173857 | 1 | 1 | 1 | 1 | 0 | 0 |
| NM_173858 | 0 | 0 | 1 | 0 | 0 | 0 |
| NM_173860 | 1 | 0 | 1 | 0 | 0 | 0 |
| NM_174855 | 1 | 0 | 1 | 1 | 0 | 0 |
| NM_174869 | 1 | 0 | 1 | 1 | 0 | 1 |
| NM_174871 | 1 | 0 | 1 | 1 | 1 | 1 |
| NM_174878 | 0 | 0 | 0 | 0 | 0 | 1 |
| NM_174879 | 1 | 0 | 1 | 0 | 0 | 0 |
| NM_174880 | 1 | 0 | 0 | 0 | 0 | 0 |
| NM_174887 | 1 | 0 | 1 | 0 | 0 | 0 |
| NM_174888 | 1 | 0 | 1 | 1 | 0 | 0 |
| NM_174889 | 1 | 1 | 1 | 1 | 0 | 0 |
| NM_174890 | 1 | 0 | 1 | 1 | 1 | 0 |
| NM_174891 | 1 | 1 | 0 | 0 | 0 | 0 |
| NM_174892 | 1 | 0 | 1 | 0 | 0 | 0 |
| NM_174896 | 1 | 1 | 1 | 1 | 1 | 1 |
| NM_174897 | 1 | 1 | 1 | 1 | 0 | 0 |
| NM_174898 | 1 | 0 | 1 | 0 | 0 | 1 |
| NM_174900 | 1 | 0 | 1 | 0 | 0 | 0 |
| NM_174901 | 1 | 0 | 1 | 0 | 0 | 1 |
| NM_174902 | 1 | 1 | 1 | 1 | 0 | 0 |
| NM_174903 | 1 | 1 | 1 | 1 | 0 | 0 |
| NM_174905 | 1 | 0 | 1 | 0 | 0 | 0 |

|           |   |   |   |   |   |   |
|-----------|---|---|---|---|---|---|
| NM_174906 | 1 | 1 | 1 | 1 | 0 | 0 |
| NM_174907 | 1 | 0 | 1 | 0 | 0 | 1 |
| NM_174908 | 1 | 0 | 1 | 1 | 0 | 0 |
| NM_174909 | 1 | 1 | 1 | 1 | 0 | 0 |
| NM_174910 | 0 | 0 | 0 | 1 | 0 | 0 |
| NM_174911 | 0 | 1 | 0 | 0 | 0 | 0 |
| NM_174912 | 1 | 1 | 1 | 1 | 0 | 0 |
| NM_174913 | 1 | 0 | 1 | 1 | 0 | 0 |
| NM_174914 | 1 | 0 | 1 | 0 | 0 | 1 |
| NM_174916 | 1 | 0 | 1 | 0 | 0 | 0 |
| NM_174917 | 1 | 1 | 1 | 0 | 0 | 0 |
| NM_174918 | 1 | 1 | 1 | 1 | 1 | 1 |
| NM_174919 | 1 | 1 | 1 | 1 | 1 | 1 |
| NM_174920 | 1 | 0 | 1 | 0 | 0 | 0 |
| NM_174921 | 1 | 1 | 1 | 1 | 0 | 0 |
| NM_174922 | 1 | 0 | 1 | 0 | 0 | 0 |
| NM_174923 | 1 | 0 | 1 | 0 | 0 | 0 |
| NM_174924 | 1 | 0 | 0 | 0 | 0 | 0 |
| NM_174925 | 1 | 1 | 1 | 1 | 0 | 0 |
| NM_174926 | 1 | 0 | 1 | 0 | 0 | 0 |
| NM_174927 | 0 | 0 | 0 | 0 | 0 | 1 |
| NM_174928 | 1 | 0 | 1 | 0 | 0 | 0 |
| NM_174930 | 1 | 0 | 1 | 0 | 0 | 0 |
| NM_174931 | 1 | 0 | 1 | 0 | 0 | 0 |
| NM_174932 | 1 | 0 | 0 | 0 | 0 | 0 |
| NM_174933 | 1 | 1 | 1 | 1 | 0 | 0 |
| NM_174934 | 1 | 1 | 1 | 1 | 0 | 0 |
| NM_174935 | 0 | 0 | 1 | 1 | 0 | 0 |
| NM_174936 | 1 | 0 | 1 | 0 | 0 | 0 |
| NM_174937 | 1 | 1 | 1 | 1 | 0 | 0 |
| NM_174938 | 1 | 1 | 1 | 1 | 1 | 1 |
| NM_174940 | 1 | 1 | 1 | 1 | 1 | 0 |
| NM_174941 | 0 | 0 | 1 | 0 | 0 | 0 |
| NM_174942 | 1 | 0 | 1 | 0 | 0 | 0 |
| NM_174943 | 1 | 1 | 1 | 1 | 0 | 0 |
| NM_174944 | 1 | 1 | 1 | 0 | 0 | 1 |
| NM_174945 | 1 | 1 | 1 | 1 | 0 | 0 |
| NM_174946 | 1 | 1 | 0 | 0 | 0 | 1 |
| NM_174948 | 1 | 0 | 1 | 1 | 0 | 0 |
| NM_174949 | 1 | 0 | 1 | 0 | 1 | 1 |
| NM_174950 | 1 | 1 | 1 | 0 | 0 | 0 |
| NM_174951 | 0 | 0 | 1 | 0 | 0 | 1 |
| NM_174953 | 1 | 0 | 1 | 0 | 0 | 0 |
| NM_174959 | 1 | 0 | 0 | 0 | 0 | 1 |
| NM_174961 | 1 | 0 | 0 | 0 | 0 | 0 |
| NM_174962 | 1 | 0 | 1 | 0 | 0 | 0 |
| NM_174970 | 1 | 0 | 1 | 0 | 0 | 0 |
| NM_174975 | 1 | 1 | 1 | 1 | 0 | 0 |
| NM_174976 | 1 | 0 | 1 | 0 | 0 | 0 |
| NM_174977 | 1 | 0 | 1 | 1 | 0 | 0 |
| NM_174978 | 1 | 0 | 0 | 0 | 0 | 0 |
| NM_174979 | 1 | 0 | 1 | 1 | 0 | 0 |



|           |   |   |   |   |   |   |
|-----------|---|---|---|---|---|---|
| NM_174981 | 1 | 0 | 1 | 0 | 0 | 1 |
| NM_174983 | 1 | 0 | 1 | 1 | 0 | 1 |
| NM_175047 | 1 | 0 | 1 | 1 | 1 | 1 |
| NM_175052 | 1 | 0 | 1 | 1 | 0 | 0 |
| NM_175053 | 1 | 0 | 1 | 0 | 0 | 0 |
| NM_175054 | 1 | 1 | 1 | 0 | 0 | 1 |
| NM_175055 | 1 | 0 | 1 | 1 | 0 | 0 |
| NM_175056 | 1 | 0 | 1 | 0 | 0 | 0 |
| NM_175058 | 1 | 1 | 1 | 1 | 0 | 0 |
| NM_175059 | 1 | 0 | 1 | 0 | 0 | 0 |
| NM_175060 | 1 | 0 | 1 | 0 | 0 | 0 |
| NM_175061 | 1 | 1 | 1 | 1 | 0 | 0 |
| NM_175063 | 1 | 1 | 1 | 1 | 1 | 1 |
| NM_175064 | 1 | 1 | 1 | 1 | 0 | 0 |
| NM_175065 | 1 | 0 | 1 | 0 | 0 | 0 |
| NM_175066 | 1 | 0 | 1 | 1 | 0 | 0 |
| NM_175068 | 1 | 0 | 1 | 1 | 0 | 0 |
| NM_175069 | 1 | 0 | 1 | 0 | 0 | 0 |
| NM_175075 | 1 | 0 | 1 | 0 | 0 | 1 |
| NM_175076 | 1 | 0 | 1 | 0 | 0 | 1 |
| NM_175077 | 1 | 1 | 1 | 1 | 1 | 1 |
| NM_175081 | 1 | 0 | 1 | 1 | 0 | 0 |
| NM_175085 | 1 | 1 | 1 | 1 | 0 | 0 |
| NM_175568 | 1 | 1 | 1 | 1 | 0 | 0 |
| NM_175569 | 1 | 0 | 1 | 0 | 0 | 0 |
| NM_175570 | 0 | 1 | 1 | 1 | 0 | 0 |
| NM_175571 | 1 | 1 | 1 | 1 | 0 | 0 |
| NM_175573 | 1 | 0 | 1 | 0 | 1 | 0 |
| NM_175605 | 1 | 1 | 1 | 1 | 0 | 0 |
| NM_175609 | 1 | 0 | 1 | 0 | 0 | 0 |
| NM_175610 | 1 | 0 | 0 | 0 | 0 | 1 |
| NM_175611 | 1 | 0 | 1 | 0 | 0 | 0 |
| NM_175614 | 1 | 1 | 1 | 1 | 0 | 0 |
| NM_175616 | 1 | 0 | 1 | 1 | 0 | 0 |
| NM_175617 | 1 | 1 | 1 | 0 | 0 | 0 |
| NM_175618 | 0 | 0 | 0 | 0 | 0 | 1 |
| NM_175619 | 1 | 0 | 1 | 1 | 0 | 0 |
| NM_175622 | 1 | 1 | 1 | 1 | 0 | 0 |
| NM_175630 | 1 | 1 | 1 | 1 | 0 | 0 |
| NM_175698 | 0 | 0 | 0 | 1 | 0 | 0 |
| NM_175709 | 1 | 1 | 1 | 0 | 1 | 1 |
| NM_175711 | 1 | 0 | 1 | 0 | 0 | 0 |
| NM_175722 | 1 | 1 | 1 | 0 | 0 | 1 |
| NM_175723 | 1 | 1 | 1 | 0 | 0 | 0 |
| NM_175726 | 1 | 0 | 0 | 0 | 0 | 0 |
| NM_175727 | 1 | 0 | 1 | 0 | 0 | 0 |
| NM_175728 | 1 | 1 | 1 | 1 | 0 | 0 |
| NM_175733 | 1 | 0 | 1 | 1 | 0 | 0 |
| NM_175734 | 1 | 0 | 1 | 0 | 0 | 0 |
| NM_175736 | 1 | 0 | 1 | 0 | 0 | 1 |
| NM_175737 | 1 | 0 | 1 | 0 | 0 | 1 |
| NM_175738 | 1 | 1 | 1 | 1 | 0 | 0 |

|           |   |   |   |   |   |   |
|-----------|---|---|---|---|---|---|
| NM_175739 | 1 | 0 | 1 | 0 | 0 | 0 |
| NM_175744 | 1 | 0 | 1 | 1 | 0 | 0 |
| NM_175747 | 0 | 0 | 0 | 0 | 0 | 1 |
| NM_175748 | 1 | 0 | 1 | 0 | 0 | 0 |
| NM_175767 | 1 | 1 | 1 | 1 | 0 | 0 |
| NM_175847 | 1 | 1 | 1 | 1 | 1 | 1 |
| NM_175853 | 1 | 0 | 1 | 1 | 0 | 0 |
| NM_175854 | 1 | 0 | 1 | 0 | 0 | 0 |
| NM_175856 | 1 | 1 | 1 | 0 | 0 | 0 |
| NM_175858 | 1 | 0 | 1 | 0 | 0 | 0 |
| NM_175862 | 1 | 0 | 1 | 1 | 0 | 1 |
| NM_175863 | 1 | 0 | 1 | 0 | 0 | 1 |
| NM_175866 | 1 | 0 | 1 | 0 | 0 | 0 |
| NM_175870 | 1 | 1 | 1 | 1 | 1 | 1 |
| NM_175871 | 1 | 1 | 1 | 1 | 0 | 0 |
| NM_175872 | 1 | 1 | 1 | 1 | 0 | 1 |
| NM_175873 | 0 | 1 | 0 | 0 | 0 | 0 |
| NM_175874 | 1 | 1 | 1 | 0 | 0 | 1 |
| NM_175875 | 1 | 1 | 1 | 1 | 0 | 0 |
| NM_175876 | 1 | 1 | 1 | 1 | 0 | 0 |
| NM_175877 | 1 | 0 | 1 | 0 | 0 | 1 |
| NM_175878 | 1 | 1 | 1 | 1 | 0 | 1 |
| NM_175880 | 1 | 1 | 1 | 1 | 0 | 0 |
| NM_175884 | 1 | 0 | 1 | 0 | 1 | 1 |
| NM_175886 | 1 | 0 | 1 | 0 | 0 | 0 |
| NM_175887 | 1 | 0 | 1 | 0 | 0 | 1 |
| NM_175889 | 1 | 0 | 1 | 0 | 0 | 0 |
| NM_175891 | 1 | 1 | 1 | 0 | 0 | 0 |
| NM_175892 | 1 | 0 | 1 | 0 | 0 | 0 |
| NM_175893 | 1 | 1 | 1 | 0 | 1 | 0 |
| NM_175894 | 1 | 0 | 1 | 0 | 0 | 1 |
| NM_175895 | 1 | 1 | 1 | 1 | 0 | 0 |
| NM_175897 | 1 | 1 | 1 | 1 | 1 | 1 |
| NM_175898 | 1 | 0 | 1 | 1 | 0 | 0 |
| NM_175900 | 1 | 0 | 1 | 0 | 0 | 0 |
| NM_175901 | 1 | 0 | 1 | 0 | 0 | 0 |
| NM_175906 | 1 | 1 | 0 | 1 | 0 | 0 |
| NM_175907 | 1 | 0 | 1 | 0 | 1 | 1 |
| NM_175908 | 0 | 0 | 1 | 0 | 0 | 0 |
| NM_175910 | 1 | 0 | 1 | 0 | 0 | 0 |
| NM_175911 | 1 | 0 | 1 | 0 | 0 | 0 |
| NM_175912 | 0 | 0 | 1 | 0 | 0 | 0 |
| NM_175914 | 1 | 0 | 1 | 0 | 0 | 0 |
| NM_175915 | 1 | 0 | 1 | 0 | 0 | 0 |
| NM_175916 | 1 | 1 | 1 | 0 | 0 | 0 |
| NM_175917 | 1 | 0 | 1 | 0 | 0 | 0 |
| NM_175918 | 1 | 0 | 1 | 0 | 0 | 0 |
| NM_175919 | 1 | 0 | 1 | 0 | 1 | 0 |
| NM_175920 | 1 | 0 | 1 | 0 | 0 | 0 |
| NM_175921 | 1 | 0 | 1 | 0 | 0 | 0 |
| NM_175922 | 0 | 0 | 1 | 0 | 0 | 0 |
| NM_175923 | 1 | 0 | 1 | 0 | 0 | 0 |

|           |   |   |   |   |   |   |
|-----------|---|---|---|---|---|---|
| NM_175924 | 1 | 0 | 1 | 0 | 0 | 1 |
| NM_175932 | 1 | 0 | 1 | 0 | 0 | 1 |
| NM_175940 | 1 | 1 | 1 | 0 | 0 | 1 |
| NM_176071 | 1 | 1 | 1 | 1 | 0 | 0 |
| NM_176081 | 1 | 0 | 1 | 0 | 0 | 0 |
| NM_176095 | 1 | 0 | 1 | 0 | 0 | 0 |
| NM_176782 | 1 | 0 | 1 | 0 | 0 | 0 |
| NM_176783 | 1 | 0 | 1 | 1 | 0 | 0 |
| NM_176789 | 1 | 1 | 1 | 1 | 1 | 0 |
| NM_176791 | 1 | 1 | 1 | 1 | 0 | 0 |
| NM_176792 | 1 | 0 | 0 | 0 | 0 | 1 |
| NM_176793 | 1 | 0 | 1 | 0 | 0 | 0 |
| NM_176794 | 1 | 0 | 1 | 0 | 0 | 0 |
| NM_176798 | 1 | 0 | 1 | 1 | 0 | 1 |
| NM_176800 | 1 | 0 | 1 | 1 | 0 | 0 |
| NM_176810 | 0 | 0 | 0 | 0 | 0 | 1 |
| NM_176811 | 1 | 0 | 0 | 0 | 0 | 0 |
| NM_176812 | 1 | 0 | 1 | 0 | 0 | 0 |
| NM_176814 | 1 | 0 | 1 | 1 | 0 | 1 |
| NM_176815 | 1 | 1 | 1 | 1 | 0 | 0 |
| NM_176816 | 1 | 0 | 1 | 0 | 0 | 1 |
| NM_176817 | 1 | 0 | 0 | 0 | 0 | 1 |
| NM_176820 | 0 | 1 | 0 | 0 | 0 | 0 |
| NM_176821 | 1 | 0 | 0 | 0 | 0 | 0 |
| NM_176822 | 1 | 0 | 0 | 0 | 0 | 1 |
| NM_176824 | 1 | 0 | 1 | 0 | 0 | 1 |
| NM_176825 | 1 | 1 | 1 | 1 | 0 | 0 |
| NM_176826 | 1 | 1 | 1 | 1 | 0 | 1 |
| NM_176827 | 1 | 1 | 1 | 1 | 0 | 0 |
| NM_176863 | 1 | 0 | 1 | 0 | 0 | 0 |
| NM_176866 | 1 | 0 | 1 | 1 | 0 | 1 |
| NM_176870 | 1 | 1 | 1 | 1 | 0 | 1 |
| NM_176871 | 1 | 0 | 1 | 1 | 0 | 0 |
| NM_176874 | 1 | 0 | 1 | 0 | 0 | 0 |
| NM_176875 | 0 | 0 | 1 | 0 | 0 | 0 |
| NM_176877 | 1 | 0 | 1 | 1 | 0 | 0 |
| NM_176878 | 1 | 1 | 1 | 1 | 0 | 0 |
| NM_176880 | 0 | 1 | 1 | 1 | 0 | 0 |
| NM_176881 | 0 | 0 | 0 | 0 | 0 | 1 |
| NM_176884 | 1 | 0 | 1 | 0 | 1 | 0 |
| NM_176885 | 1 | 0 | 1 | 1 | 0 | 1 |
| NM_176886 | 1 | 1 | 1 | 1 | 1 | 1 |
| NM_176888 | 1 | 0 | 1 | 0 | 0 | 1 |
| NM_176889 | 1 | 0 | 1 | 1 | 0 | 0 |
| NM_176890 | 0 | 0 | 0 | 0 | 0 | 1 |
| NM_176891 | 1 | 0 | 1 | 0 | 0 | 1 |
| NM_176895 | 1 | 1 | 1 | 1 | 1 | 1 |
| NM_177400 | 1 | 1 | 1 | 0 | 0 | 0 |
| NM_177402 | 1 | 0 | 0 | 0 | 0 | 1 |
| NM_177403 | 1 | 1 | 1 | 1 | 0 | 0 |
| NM_177414 | 1 | 1 | 1 | 1 | 0 | 1 |
| NM_177417 | 1 | 1 | 1 | 1 | 0 | 0 |

|           |   |   |   |   |   |   |
|-----------|---|---|---|---|---|---|
| NM_177423 | 1 | 1 | 1 | 1 | 0 | 1 |
| NM_177424 | 1 | 0 | 1 | 0 | 0 | 0 |
| NM_177427 | 1 | 1 | 1 | 1 | 0 | 0 |
| NM_177434 | 1 | 1 | 1 | 1 | 0 | 0 |
| NM_177435 | 1 | 0 | 1 | 0 | 0 | 0 |
| NM_177437 | 1 | 0 | 0 | 0 | 0 | 1 |
| NM_177439 | 1 | 1 | 1 | 1 | 0 | 0 |
| NM_177441 | 1 | 0 | 1 | 1 | 0 | 0 |
| NM_177442 | 1 | 1 | 1 | 1 | 0 | 0 |
| NM_177444 | 1 | 0 | 1 | 0 | 0 | 1 |
| NM_177452 | 1 | 0 | 1 | 0 | 0 | 0 |
| NM_177453 | 1 | 0 | 1 | 0 | 0 | 0 |
| NM_177454 | 1 | 0 | 1 | 1 | 0 | 0 |
| NM_177456 | 1 | 0 | 1 | 1 | 0 | 0 |
| NM_177457 | 1 | 0 | 0 | 0 | 0 | 1 |
| NM_177458 | 1 | 0 | 1 | 0 | 0 | 1 |
| NM_177478 | 1 | 0 | 1 | 1 | 0 | 0 |
| NM_177483 | 1 | 0 | 1 | 0 | 1 | 1 |
| NM_177524 | 1 | 1 | 1 | 1 | 1 | 0 |
| NM_177527 | 1 | 0 | 1 | 0 | 0 | 1 |
| NM_177531 | 1 | 0 | 1 | 0 | 0 | 0 |
| NM_177533 | 1 | 1 | 0 | 0 | 0 | 0 |
| NM_177538 | 1 | 0 | 1 | 0 | 0 | 1 |
| NM_177542 | 1 | 0 | 1 | 0 | 0 | 0 |
| NM_177549 | 1 | 0 | 1 | 0 | 0 | 0 |
| NM_177550 | 0 | 0 | 0 | 0 | 0 | 1 |
| NM_177551 | 1 | 0 | 1 | 0 | 1 | 1 |
| NM_177552 | 1 | 1 | 1 | 1 | 0 | 0 |
| NM_177553 | 1 | 0 | 1 | 0 | 0 | 0 |
| NM_177925 | 1 | 0 | 1 | 1 | 0 | 1 |
| NM_177926 | 1 | 1 | 1 | 1 | 0 | 1 |
| NM_177947 | 1 | 0 | 1 | 1 | 0 | 0 |
| NM_177948 | 1 | 0 | 1 | 1 | 0 | 0 |
| NM_177949 | 1 | 0 | 1 | 1 | 0 | 0 |
| NM_177951 | 1 | 0 | 1 | 1 | 0 | 1 |
| NM_177954 | 1 | 0 | 1 | 0 | 0 | 0 |
| NM_177963 | 0 | 0 | 0 | 0 | 0 | 1 |
| NM_177964 | 1 | 0 | 1 | 1 | 0 | 0 |
| NM_177965 | 1 | 1 | 1 | 1 | 0 | 0 |
| NM_177966 | 1 | 0 | 1 | 1 | 0 | 1 |
| NM_177967 | 1 | 1 | 1 | 1 | 0 | 0 |
| NM_177968 | 1 | 1 | 1 | 1 | 0 | 1 |
| NM_177969 | 1 | 0 | 1 | 0 | 0 | 0 |
| NM_177972 | 1 | 0 | 1 | 0 | 0 | 0 |
| NM_177973 | 1 | 1 | 1 | 1 | 0 | 0 |
| NM_177978 | 1 | 1 | 1 | 1 | 1 | 0 |
| NM_177980 | 1 | 0 | 1 | 1 | 0 | 0 |
| NM_177983 | 1 | 1 | 1 | 1 | 0 | 0 |
| NM_177985 | 1 | 0 | 1 | 0 | 0 | 0 |
| NM_177986 | 1 | 0 | 0 | 0 | 0 | 1 |
| NM_177988 | 1 | 0 | 1 | 1 | 0 | 1 |
| NM_177989 | 1 | 0 | 1 | 1 | 0 | 0 |

|           |   |   |   |   |   |   |
|-----------|---|---|---|---|---|---|
| NM_177990 | 0 | 0 | 0 | 0 | 1 | 0 |
| NM_177991 | 1 | 0 | 1 | 0 | 0 | 0 |
| NM_177995 | 1 | 1 | 1 | 1 | 1 | 1 |
| NM_177998 | 0 | 0 | 0 | 1 | 0 | 1 |
| NM_177999 | 1 | 0 | 1 | 0 | 0 | 0 |
| NM_178004 | 1 | 0 | 1 | 0 | 0 | 0 |
| NM_178009 | 1 | 1 | 1 | 0 | 0 | 0 |
| NM_178011 | 0 | 0 | 1 | 0 | 0 | 0 |
| NM_178012 | 1 | 0 | 1 | 0 | 0 | 1 |
| NM_178014 | 1 | 1 | 1 | 1 | 0 | 1 |
| NM_178025 | 1 | 1 | 1 | 1 | 0 | 0 |
| NM_178026 | 1 | 1 | 1 | 1 | 0 | 0 |
| NM_178031 | 1 | 0 | 1 | 1 | 0 | 0 |
| NM_178033 | 0 | 0 | 0 | 0 | 0 | 1 |
| NM_178034 | 1 | 0 | 1 | 0 | 0 | 0 |
| NM_178043 | 1 | 0 | 1 | 0 | 0 | 0 |
| NM_178044 | 1 | 1 | 1 | 1 | 0 | 0 |
| NM_178120 | 1 | 1 | 0 | 0 | 0 | 1 |
| NM_178121 | 1 | 1 | 1 | 1 | 0 | 0 |
| NM_178122 | 1 | 1 | 1 | 0 | 0 | 1 |
| NM_178123 | 1 | 1 | 1 | 0 | 0 | 1 |
| NM_178124 | 1 | 0 | 1 | 1 | 0 | 0 |
| NM_178125 | 1 | 1 | 1 | 0 | 0 | 1 |
| NM_178126 | 1 | 0 | 1 | 0 | 0 | 0 |
| NM_178127 | 1 | 0 | 1 | 0 | 0 | 0 |
| NM_178128 | 1 | 0 | 0 | 0 | 0 | 1 |
| NM_178129 | 1 | 0 | 1 | 1 | 0 | 0 |
| NM_178130 | 1 | 0 | 1 | 0 | 0 | 0 |
| NM_178135 | 1 | 0 | 1 | 1 | 0 | 0 |
| NM_178136 | 1 | 0 | 1 | 0 | 0 | 0 |
| NM_178137 | 1 | 0 | 1 | 1 | 0 | 1 |
| NM_178140 | 1 | 0 | 1 | 0 | 0 | 0 |
| NM_178145 | 1 | 1 | 1 | 1 | 0 | 1 |
| NM_178148 | 1 | 1 | 1 | 1 | 0 | 0 |
| NM_178154 | 1 | 1 | 1 | 0 | 0 | 1 |
| NM_178155 | 1 | 0 | 1 | 0 | 0 | 1 |
| NM_178159 | 1 | 1 | 1 | 0 | 0 | 1 |
| NM_178160 | 1 | 0 | 0 | 0 | 0 | 0 |
| NM_178161 | 1 | 0 | 1 | 0 | 0 | 0 |
| NM_178167 | 1 | 1 | 1 | 1 | 0 | 0 |
| NM_178168 | 1 | 0 | 1 | 1 | 0 | 0 |
| NM_178169 | 1 | 1 | 1 | 1 | 0 | 0 |
| NM_178170 | 1 | 0 | 1 | 1 | 0 | 0 |
| NM_178171 | 1 | 0 | 1 | 0 | 0 | 0 |
| NM_178172 | 1 | 0 | 1 | 0 | 0 | 0 |
| NM_178174 | 1 | 0 | 1 | 0 | 0 | 1 |
| NM_178175 | 1 | 0 | 1 | 1 | 0 | 0 |
| NM_178176 | 1 | 0 | 1 | 0 | 1 | 0 |
| NM_178177 | 1 | 1 | 1 | 1 | 0 | 0 |
| NM_178178 | 1 | 0 | 1 | 0 | 0 | 0 |
| NM_178190 | 1 | 0 | 1 | 1 | 0 | 0 |
| NM_178225 | 1 | 1 | 1 | 1 | 0 | 0 |

|           |   |   |   |   |   |   |
|-----------|---|---|---|---|---|---|
| NM_178228 | 1 | 1 | 1 | 1 | 0 | 0 |
| NM_178229 | 1 | 0 | 1 | 0 | 1 | 0 |
| NM_178230 | 1 | 0 | 0 | 0 | 0 | 0 |
| NM_178231 | 1 | 0 | 1 | 0 | 0 | 0 |
| NM_178232 | 1 | 1 | 1 | 1 | 0 | 0 |
| NM_178233 | 1 | 1 | 1 | 1 | 0 | 0 |
| NM_178270 | 1 | 0 | 1 | 0 | 0 | 0 |
| NM_178271 | 1 | 0 | 1 | 0 | 0 | 0 |
| NM_178273 | 1 | 1 | 1 | 1 | 1 | 1 |
| NM_178275 | 1 | 1 | 1 | 1 | 0 | 1 |
| NM_178276 | 1 | 0 | 1 | 0 | 1 | 0 |
| NM_178314 | 1 | 1 | 1 | 1 | 0 | 1 |
| NM_178315 | 1 | 0 | 1 | 0 | 0 | 0 |
| NM_178324 | 1 | 0 | 1 | 0 | 0 | 0 |
| NM_178331 | 1 | 0 | 1 | 0 | 0 | 1 |
| NM_178339 | 0 | 0 | 0 | 0 | 0 | 1 |
| NM_178340 | 1 | 0 | 0 | 0 | 0 | 0 |
| NM_178341 | 1 | 0 | 1 | 0 | 0 | 1 |
| NM_178342 | 1 | 0 | 0 | 0 | 0 | 1 |
| NM_178343 | 1 | 0 | 0 | 0 | 0 | 1 |
| NM_178344 | 1 | 1 | 1 | 1 | 0 | 1 |
| NM_178348 | 0 | 0 | 0 | 0 | 0 | 1 |
| NM_178351 | 1 | 0 | 1 | 0 | 1 | 1 |
| NM_178352 | 1 | 1 | 1 | 1 | 1 | 1 |
| NM_178353 | 1 | 1 | 1 | 1 | 0 | 1 |
| NM_178354 | 1 | 0 | 1 | 0 | 0 | 0 |
| NM_178356 | 1 | 0 | 1 | 1 | 1 | 1 |
| NM_178422 | 1 | 0 | 1 | 1 | 0 | 0 |
| NM_178423 | 1 | 1 | 1 | 1 | 0 | 0 |
| NM_178424 | 1 | 0 | 0 | 0 | 0 | 1 |
| NM_178427 | 1 | 0 | 1 | 0 | 0 | 0 |
| NM_178428 | 1 | 0 | 1 | 0 | 0 | 0 |
| NM_178429 | 1 | 1 | 1 | 1 | 0 | 0 |
| NM_178430 | 1 | 1 | 1 | 0 | 0 | 0 |
| NM_178431 | 1 | 0 | 1 | 0 | 0 | 1 |
| NM_178432 | 1 | 1 | 1 | 1 | 1 | 1 |
| NM_178433 | 1 | 0 | 1 | 0 | 0 | 0 |
| NM_178434 | 1 | 1 | 1 | 0 | 0 | 1 |
| NM_178435 | 1 | 0 | 0 | 0 | 0 | 1 |
| NM_178438 | 1 | 0 | 1 | 0 | 0 | 0 |
| NM_178439 | 1 | 0 | 1 | 1 | 0 | 1 |
| NM_178445 | 1 | 0 | 1 | 1 | 0 | 0 |
| NM_178448 | 1 | 0 | 1 | 0 | 0 | 1 |
| NM_178449 | 1 | 1 | 1 | 1 | 0 | 0 |
| NM_178450 | 1 | 1 | 1 | 1 | 1 | 1 |
| NM_178451 | 1 | 0 | 1 | 0 | 0 | 0 |
| NM_178452 | 1 | 0 | 1 | 0 | 0 | 0 |
| NM_178453 | 1 | 1 | 1 | 1 | 0 | 0 |
| NM_178454 | 1 | 1 | 1 | 1 | 0 | 0 |
| NM_178460 | 1 | 0 | 1 | 1 | 0 | 0 |
| NM_178462 | 1 | 1 | 1 | 0 | 0 | 1 |
| NM_178463 | 1 | 0 | 1 | 1 | 0 | 0 |

|           |   |   |   |   |   |   |
|-----------|---|---|---|---|---|---|
| NM_178465 | 1 | 0 | 1 | 0 | 0 | 0 |
| NM_178466 | 1 | 0 | 0 | 0 | 0 | 0 |
| NM_178467 | 1 | 0 | 1 | 0 | 0 | 0 |
| NM_178469 | 1 | 0 | 1 | 0 | 0 | 1 |
| NM_178470 | 1 | 0 | 1 | 0 | 0 | 0 |
| NM_178471 | 1 | 0 | 0 | 0 | 0 | 0 |
| NM_178472 | 1 | 1 | 1 | 1 | 0 | 0 |
| NM_178477 | 1 | 0 | 1 | 1 | 0 | 0 |
| NM_178487 | 0 | 0 | 1 | 0 | 0 | 0 |
| NM_178491 | 0 | 0 | 0 | 0 | 0 | 1 |
| NM_178493 | 1 | 0 | 1 | 0 | 0 | 0 |
| NM_178494 | 1 | 0 | 1 | 1 | 0 | 0 |
| NM_178495 | 1 | 0 | 1 | 1 | 0 | 0 |
| NM_178496 | 1 | 1 | 1 | 1 | 1 | 0 |
| NM_178497 | 1 | 0 | 1 | 0 | 0 | 1 |
| NM_178500 | 1 | 1 | 1 | 1 | 0 | 1 |
| NM_178501 | 0 | 0 | 0 | 0 | 0 | 1 |
| NM_178502 | 1 | 0 | 1 | 1 | 0 | 0 |
| NM_178503 | 1 | 1 | 1 | 1 | 0 | 0 |
| NM_178504 | 1 | 0 | 1 | 0 | 0 | 0 |
| NM_178507 | 1 | 1 | 1 | 1 | 0 | 0 |
| NM_178508 | 1 | 0 | 1 | 0 | 0 | 1 |
| NM_178510 | 1 | 0 | 1 | 0 | 0 | 0 |
| NM_178511 | 1 | 0 | 1 | 1 | 0 | 0 |
| NM_178512 | 1 | 0 | 0 | 0 | 0 | 1 |
| NM_178513 | 1 | 1 | 1 | 1 | 0 | 0 |
| NM_178514 | 0 | 0 | 0 | 1 | 0 | 0 |
| NM_178515 | 1 | 0 | 1 | 0 | 0 | 0 |
| NM_178516 | 1 | 0 | 1 | 0 | 0 | 1 |
| NM_178517 | 1 | 1 | 1 | 1 | 0 | 0 |
| NM_178518 | 1 | 0 | 1 | 0 | 0 | 0 |
| NM_178519 | 1 | 1 | 1 | 1 | 0 | 1 |
| NM_178520 | 1 | 0 | 1 | 1 | 0 | 0 |
| NM_178521 | 1 | 0 | 1 | 0 | 0 | 0 |
| NM_178523 | 1 | 0 | 1 | 1 | 0 | 0 |
| NM_178525 | 1 | 1 | 1 | 1 | 0 | 0 |
| NM_178527 | 1 | 0 | 1 | 0 | 0 | 0 |
| NM_178528 | 1 | 0 | 1 | 0 | 0 | 0 |
| NM_178529 | 1 | 1 | 1 | 1 | 0 | 0 |
| NM_178530 | 1 | 1 | 1 | 1 | 1 | 1 |
| NM_178531 | 1 | 0 | 1 | 0 | 1 | 1 |
| NM_178534 | 0 | 0 | 1 | 0 | 0 | 0 |
| NM_178535 | 1 | 1 | 1 | 1 | 0 | 0 |
| NM_178536 | 1 | 0 | 1 | 1 | 1 | 1 |
| NM_178537 | 1 | 0 | 1 | 1 | 0 | 1 |
| NM_178538 | 1 | 1 | 1 | 1 | 0 | 0 |
| NM_178539 | 1 | 1 | 1 | 1 | 0 | 0 |
| NM_178542 | 1 | 0 | 1 | 1 | 0 | 0 |
| NM_178543 | 1 | 0 | 1 | 1 | 1 | 0 |
| NM_178544 | 1 | 0 | 1 | 0 | 0 | 0 |
| NM_178545 | 1 | 0 | 1 | 1 | 0 | 0 |
| NM_178546 | 1 | 0 | 1 | 1 | 1 | 0 |

|           |   |   |   |   |   |   |
|-----------|---|---|---|---|---|---|
| NM_178547 | 1 | 0 | 1 | 0 | 0 | 0 |
| NM_178548 | 1 | 0 | 1 | 1 | 0 | 0 |
| NM_178549 | 1 | 0 | 1 | 0 | 0 | 0 |
| NM_178550 | 0 | 0 | 0 | 0 | 0 | 1 |
| NM_178553 | 1 | 0 | 1 | 0 | 0 | 0 |
| NM_178554 | 1 | 0 | 0 | 0 | 0 | 1 |
| NM_178555 | 0 | 0 | 0 | 0 | 0 | 1 |
| NM_178556 | 1 | 0 | 1 | 0 | 0 | 0 |
| NM_178557 | 1 | 0 | 1 | 1 | 0 | 0 |
| NM_178558 | 1 | 1 | 1 | 1 | 0 | 0 |
| NM_178559 | 0 | 0 | 0 | 0 | 0 | 1 |
| NM_178561 | 1 | 0 | 1 | 0 | 0 | 1 |
| NM_178562 | 1 | 0 | 1 | 0 | 0 | 1 |
| NM_178564 | 1 | 0 | 1 | 1 | 1 | 1 |
| NM_178565 | 1 | 0 | 1 | 1 | 0 | 0 |
| NM_178566 | 1 | 0 | 1 | 0 | 0 | 0 |
| NM_178567 | 1 | 0 | 0 | 0 | 0 | 0 |
| NM_178568 | 1 | 0 | 1 | 0 | 0 | 0 |
| NM_178569 | 1 | 0 | 1 | 0 | 0 | 1 |
| NM_178570 | 0 | 0 | 0 | 0 | 0 | 1 |
| NM_178571 | 1 | 0 | 0 | 0 | 0 | 0 |
| NM_178580 | 1 | 0 | 1 | 1 | 1 | 1 |
| NM_178582 | 1 | 0 | 1 | 1 | 0 | 1 |
| NM_178583 | 1 | 1 | 1 | 1 | 1 | 1 |
| NM_178587 | 1 | 0 | 1 | 0 | 0 | 0 |
| NM_178588 | 1 | 1 | 1 | 0 | 0 | 0 |
| NM_178812 | 1 | 0 | 1 | 0 | 1 | 1 |
| NM_178813 | 1 | 0 | 1 | 1 | 0 | 0 |
| NM_178814 | 1 | 0 | 1 | 0 | 1 | 0 |
| NM_178815 | 1 | 1 | 1 | 1 | 0 | 0 |
| NM_178817 | 1 | 0 | 1 | 0 | 0 | 0 |
| NM_178818 | 1 | 1 | 1 | 1 | 0 | 0 |
| NM_178819 | 1 | 0 | 1 | 0 | 0 | 0 |
| NM_178820 | 1 | 0 | 1 | 0 | 0 | 1 |
| NM_178821 | 0 | 0 | 1 | 0 | 0 | 0 |
| NM_178822 | 1 | 0 | 1 | 0 | 0 | 0 |
| NM_178823 | 1 | 0 | 0 | 0 | 0 | 1 |
| NM_178824 | 1 | 1 | 1 | 1 | 1 | 1 |
| NM_178827 | 0 | 1 | 0 | 0 | 0 | 0 |
| NM_178828 | 1 | 0 | 0 | 0 | 0 | 1 |
| NM_178829 | 1 | 1 | 1 | 1 | 0 | 0 |
| NM_178830 | 1 | 0 | 1 | 1 | 0 | 0 |
| NM_178832 | 1 | 1 | 1 | 0 | 1 | 1 |
| NM_178833 | 1 | 1 | 1 | 1 | 0 | 0 |
| NM_178834 | 1 | 0 | 1 | 0 | 0 | 0 |
| NM_178835 | 1 | 1 | 1 | 1 | 0 | 0 |
| NM_178836 | 1 | 1 | 1 | 1 | 0 | 0 |
| NM_178837 | 1 | 0 | 0 | 0 | 0 | 0 |
| NM_178841 | 1 | 0 | 1 | 1 | 0 | 1 |
| NM_178842 | 1 | 0 | 1 | 0 | 0 | 1 |
| NM_178849 | 1 | 0 | 1 | 0 | 0 | 1 |
| NM_178850 | 0 | 0 | 0 | 0 | 0 | 1 |



|           |   |   |   |   |   |   |
|-----------|---|---|---|---|---|---|
| NM_178857 | 1 | 1 | 1 | 0 | 0 | 0 |
| NM_178858 | 1 | 0 | 1 | 1 | 0 | 0 |
| NM_178859 | 1 | 1 | 1 | 1 | 0 | 0 |
| NM_178860 | 1 | 0 | 0 | 0 | 0 | 0 |
| NM_178861 | 0 | 0 | 0 | 0 | 0 | 1 |
| NM_178862 | 1 | 1 | 1 | 1 | 0 | 0 |
| NM_178863 | 1 | 0 | 1 | 0 | 0 | 0 |
| NM_178864 | 1 | 1 | 1 | 1 | 0 | 0 |
| NM_178865 | 1 | 1 | 1 | 1 | 0 | 0 |
| NM_178867 | 1 | 1 | 1 | 1 | 0 | 1 |
| NM_178868 | 1 | 1 | 1 | 1 | 0 | 0 |
| NM_180699 | 1 | 0 | 1 | 1 | 0 | 0 |
| NM_180989 | 1 | 0 | 1 | 0 | 0 | 0 |
| NM_180990 | 1 | 0 | 1 | 0 | 0 | 0 |
| NM_180991 | 1 | 0 | 1 | 1 | 0 | 0 |
| NM_181050 | 1 | 0 | 1 | 1 | 0 | 0 |
| NM_181054 | 1 | 1 | 1 | 1 | 1 | 1 |
| NM_181078 | 1 | 0 | 1 | 0 | 0 | 0 |
| NM_181265 | 1 | 0 | 1 | 0 | 0 | 1 |
| NM_181288 | 1 | 0 | 1 | 1 | 0 | 0 |
| NM_181291 | 1 | 0 | 1 | 1 | 0 | 0 |
| NM_181305 | 1 | 1 | 1 | 1 | 0 | 0 |
| NM_181313 | 1 | 0 | 1 | 1 | 1 | 1 |
| NM_181314 | 1 | 1 | 1 | 1 | 0 | 0 |
| NM_181332 | 1 | 0 | 1 | 0 | 0 | 0 |
| NM_181333 | 1 | 0 | 1 | 0 | 0 | 0 |
| NM_181334 | 1 | 1 | 0 | 0 | 0 | 1 |
| NM_181336 | 1 | 1 | 1 | 1 | 0 | 0 |
| NM_181337 | 1 | 0 | 0 | 0 | 0 | 1 |
| NM_181340 | 1 | 1 | 1 | 1 | 0 | 1 |
| NM_181354 | 1 | 1 | 1 | 1 | 0 | 0 |
| NM_181355 | 1 | 0 | 1 | 1 | 0 | 0 |
| NM_181357 | 1 | 0 | 1 | 1 | 0 | 0 |
| NM_181361 | 0 | 1 | 0 | 1 | 0 | 0 |
| NM_181425 | 1 | 0 | 1 | 0 | 0 | 0 |
| NM_181428 | 1 | 1 | 0 | 0 | 0 | 0 |
| NM_181429 | 1 | 0 | 1 | 1 | 0 | 0 |
| NM_181430 | 1 | 0 | 1 | 0 | 0 | 0 |
| NM_181435 | 1 | 0 | 1 | 1 | 0 | 0 |
| NM_181442 | 1 | 0 | 1 | 0 | 0 | 0 |
| NM_181443 | 1 | 0 | 1 | 1 | 0 | 1 |
| NM_181449 | 1 | 0 | 1 | 0 | 0 | 0 |
| NM_181453 | 1 | 0 | 1 | 0 | 0 | 0 |
| NM_181458 | 1 | 0 | 1 | 0 | 0 | 0 |
| NM_181461 | 1 | 0 | 1 | 1 | 1 | 1 |
| NM_181462 | 1 | 0 | 1 | 1 | 0 | 0 |
| NM_181466 | 1 | 0 | 1 | 0 | 1 | 0 |
| NM_181486 | 1 | 1 | 1 | 1 | 0 | 0 |
| NM_181489 | 0 | 0 | 1 | 0 | 0 | 0 |
| NM_181493 | 1 | 1 | 1 | 1 | 0 | 0 |
| NM_181500 | 1 | 0 | 1 | 1 | 0 | 1 |
| NM_181501 | 1 | 0 | 1 | 0 | 0 | 0 |

|           |   |   |   |   |   |   |
|-----------|---|---|---|---|---|---|
| NM_181503 | 1 | 1 | 1 | 1 | 0 | 0 |
| NM_181506 | 1 | 1 | 1 | 1 | 0 | 0 |
| NM_181507 | 1 | 0 | 1 | 0 | 0 | 0 |
| NM_181510 | 1 | 0 | 1 | 1 | 0 | 0 |
| NM_181512 | 1 | 0 | 1 | 0 | 0 | 0 |
| NM_181515 | 1 | 0 | 1 | 1 | 0 | 0 |
| NM_181519 | 1 | 0 | 1 | 0 | 0 | 0 |
| NM_181521 | 1 | 1 | 1 | 1 | 1 | 0 |
| NM_181523 | 1 | 0 | 1 | 1 | 0 | 0 |
| NM_181526 | 1 | 0 | 1 | 0 | 0 | 1 |
| NM_181532 | 0 | 0 | 1 | 0 | 0 | 0 |
| NM_181533 | 1 | 0 | 1 | 0 | 0 | 0 |
| NM_181534 | 1 | 1 | 1 | 1 | 1 | 1 |
| NM_181536 | 1 | 0 | 1 | 1 | 0 | 1 |
| NM_181537 | 1 | 1 | 1 | 1 | 0 | 0 |
| NM_181538 | 1 | 0 | 1 | 0 | 0 | 0 |
| NM_181539 | 1 | 0 | 0 | 0 | 0 | 1 |
| NM_181552 | 1 | 0 | 1 | 1 | 0 | 0 |
| NM_181555 | 1 | 1 | 1 | 1 | 0 | 1 |
| NM_181558 | 1 | 0 | 1 | 0 | 0 | 0 |
| NM_181572 | 1 | 0 | 1 | 0 | 0 | 0 |
| NM_181573 | 1 | 0 | 1 | 0 | 0 | 0 |
| NM_181581 | 1 | 0 | 1 | 1 | 0 | 0 |
| NM_181597 | 1 | 1 | 1 | 1 | 0 | 0 |
| NM_181598 | 1 | 1 | 1 | 0 | 0 | 0 |
| NM_181599 | 1 | 1 | 0 | 0 | 0 | 1 |
| NM_181600 | 1 | 0 | 1 | 0 | 0 | 0 |
| NM_181602 | 1 | 1 | 1 | 1 | 0 | 0 |
| NM_181604 | 1 | 0 | 1 | 1 | 0 | 0 |
| NM_181605 | 1 | 0 | 1 | 1 | 0 | 0 |
| NM_181607 | 1 | 1 | 1 | 0 | 0 | 0 |
| NM_181608 | 1 | 0 | 1 | 1 | 0 | 0 |
| NM_181609 | 1 | 0 | 1 | 1 | 0 | 0 |
| NM_181611 | 1 | 1 | 1 | 1 | 0 | 0 |
| NM_181612 | 1 | 0 | 1 | 0 | 0 | 0 |
| NM_181613 | 1 | 1 | 1 | 1 | 0 | 0 |
| NM_181614 | 1 | 0 | 1 | 0 | 0 | 0 |
| NM_181615 | 1 | 0 | 1 | 0 | 0 | 0 |
| NM_181616 | 0 | 0 | 1 | 0 | 1 | 0 |
| NM_181617 | 0 | 0 | 0 | 0 | 1 | 1 |
| NM_181618 | 1 | 0 | 1 | 0 | 0 | 0 |
| NM_181619 | 1 | 1 | 1 | 1 | 1 | 1 |
| NM_181620 | 1 | 1 | 1 | 1 | 0 | 0 |
| NM_181621 | 1 | 0 | 1 | 0 | 0 | 1 |
| NM_181622 | 1 | 1 | 1 | 1 | 0 | 0 |
| NM_181623 | 1 | 1 | 1 | 1 | 0 | 0 |
| NM_181624 | 1 | 0 | 1 | 0 | 0 | 0 |
| NM_181643 | 0 | 0 | 1 | 0 | 0 | 0 |
| NM_181644 | 1 | 0 | 1 | 0 | 0 | 0 |
| NM_181647 | 1 | 0 | 1 | 1 | 0 | 0 |
| NM_181651 | 1 | 0 | 1 | 1 | 0 | 0 |
| NM_181652 | 1 | 0 | 1 | 1 | 0 | 1 |

|           |   |   |   |   |   |   |
|-----------|---|---|---|---|---|---|
| NM_181654 | 1 | 0 | 0 | 0 | 0 | 1 |
| NM_181656 | 1 | 0 | 1 | 1 | 1 | 1 |
| NM_181657 | 1 | 0 | 1 | 1 | 0 | 1 |
| NM_181659 | 1 | 1 | 1 | 1 | 0 | 0 |
| NM_181676 | 1 | 0 | 1 | 1 | 1 | 0 |
| NM_181679 | 1 | 0 | 1 | 0 | 0 | 0 |
| NM_181684 | 0 | 0 | 1 | 0 | 0 | 0 |
| NM_181686 | 1 | 0 | 0 | 0 | 0 | 0 |
| NM_181688 | 1 | 0 | 1 | 1 | 0 | 0 |
| NM_181690 | 1 | 0 | 1 | 0 | 0 | 0 |
| NM_181696 | 1 | 1 | 1 | 1 | 0 | 0 |
| NM_181698 | 1 | 1 | 1 | 1 | 0 | 0 |
| NM_181699 | 1 | 0 | 1 | 0 | 0 | 1 |
| NM_181701 | 1 | 0 | 1 | 1 | 1 | 1 |
| NM_181702 | 1 | 1 | 1 | 0 | 0 | 0 |
| NM_181703 | 1 | 0 | 1 | 0 | 0 | 0 |
| NM_181704 | 1 | 0 | 1 | 0 | 0 | 0 |
| NM_181705 | 1 | 0 | 1 | 0 | 0 | 0 |
| NM_181706 | 1 | 0 | 1 | 1 | 0 | 0 |
| NM_181707 | 0 | 0 | 1 | 1 | 0 | 0 |
| NM_181708 | 1 | 1 | 1 | 1 | 0 | 0 |
| NM_181710 | 1 | 1 | 1 | 1 | 1 | 1 |
| NM_181711 | 1 | 1 | 1 | 1 | 0 | 0 |
| NM_181712 | 0 | 0 | 0 | 0 | 0 | 1 |
| NM_181713 | 1 | 0 | 1 | 0 | 0 | 1 |
| NM_181714 | 1 | 0 | 1 | 1 | 0 | 0 |
| NM_181715 | 1 | 0 | 1 | 0 | 0 | 1 |
| NM_181716 | 1 | 1 | 1 | 1 | 1 | 1 |
| NM_181717 | 1 | 1 | 1 | 1 | 0 | 1 |
| NM_181719 | 1 | 0 | 1 | 1 | 1 | 1 |
| NM_181720 | 1 | 1 | 1 | 1 | 0 | 0 |
| NM_181722 | 1 | 1 | 1 | 1 | 0 | 0 |
| NM_181723 | 1 | 0 | 1 | 1 | 0 | 0 |
| NM_181724 | 1 | 1 | 1 | 0 | 0 | 0 |
| NM_181725 | 1 | 0 | 1 | 0 | 0 | 0 |
| NM_181726 | 1 | 0 | 1 | 0 | 0 | 1 |
| NM_181727 | 1 | 1 | 1 | 1 | 0 | 0 |
| NM_181733 | 1 | 0 | 1 | 1 | 0 | 0 |
| NM_181737 | 1 | 1 | 1 | 1 | 0 | 1 |
| NM_181738 | 1 | 0 | 1 | 1 | 0 | 0 |
| NM_181739 | 1 | 0 | 1 | 1 | 1 | 0 |
| NM_181741 | 1 | 0 | 1 | 0 | 1 | 1 |
| NM_181745 | 1 | 0 | 1 | 0 | 0 | 0 |
| NM_181747 | 1 | 0 | 1 | 0 | 0 | 0 |
| NM_181755 | 1 | 1 | 1 | 1 | 1 | 1 |
| NM_181756 | 1 | 0 | 1 | 0 | 0 | 0 |
| NM_181773 | 1 | 1 | 1 | 1 | 0 | 1 |
| NM_181774 | 0 | 0 | 0 | 0 | 0 | 1 |
| NM_181775 | 1 | 0 | 1 | 0 | 0 | 0 |
| NM_181777 | 1 | 1 | 1 | 1 | 0 | 0 |
| NM_181780 | 1 | 1 | 1 | 1 | 0 | 0 |
| NM_181782 | 1 | 0 | 1 | 0 | 0 | 0 |

|           |   |   |   |   |   |   |
|-----------|---|---|---|---|---|---|
| NM_181783 | 1 | 0 | 1 | 0 | 0 | 0 |
| NM_181784 | 1 | 0 | 1 | 1 | 0 | 1 |
| NM_181785 | 1 | 0 | 1 | 1 | 0 | 0 |
| NM_181786 | 1 | 0 | 1 | 0 | 0 | 0 |
| NM_181787 | 1 | 0 | 1 | 1 | 1 | 1 |
| NM_181788 | 1 | 0 | 1 | 0 | 1 | 1 |
| NM_181789 | 1 | 0 | 1 | 0 | 0 | 0 |
| NM_181790 | 1 | 1 | 1 | 1 | 0 | 0 |
| NM_181791 | 1 | 1 | 1 | 1 | 0 | 0 |
| NM_181802 | 1 | 1 | 1 | 1 | 0 | 0 |
| NM_181804 | 1 | 0 | 1 | 1 | 1 | 0 |
| NM_181806 | 1 | 0 | 1 | 1 | 1 | 1 |
| NM_181807 | 1 | 0 | 1 | 1 | 0 | 0 |
| NM_181808 | 1 | 0 | 1 | 0 | 0 | 0 |
| NM_181809 | 0 | 0 | 0 | 0 | 0 | 1 |
| NM_181814 | 1 | 1 | 1 | 1 | 0 | 0 |
| NM_181830 | 1 | 1 | 1 | 1 | 0 | 0 |
| NM_181836 | 1 | 0 | 1 | 1 | 0 | 1 |
| NM_181838 | 1 | 0 | 1 | 0 | 0 | 0 |
| NM_181839 | 1 | 1 | 1 | 1 | 0 | 0 |
| NM_181840 | 0 | 0 | 0 | 0 | 0 | 1 |
| NM_181841 | 1 | 0 | 1 | 0 | 0 | 0 |
| NM_181842 | 0 | 0 | 0 | 0 | 0 | 1 |
| NM_181843 | 1 | 1 | 1 | 1 | 0 | 0 |
| NM_181844 | 0 | 0 | 0 | 0 | 0 | 1 |
| NM_181846 | 1 | 0 | 1 | 1 | 0 | 0 |
| NM_181847 | 1 | 0 | 1 | 1 | 0 | 0 |
| NM_181870 | 1 | 1 | 1 | 1 | 1 | 1 |
| NM_181871 | 1 | 0 | 1 | 1 | 0 | 0 |
| NM_181873 | 1 | 1 | 1 | 1 | 1 | 0 |
| NM_181874 | 1 | 1 | 1 | 1 | 0 | 1 |
| NM_181875 | 1 | 0 | 1 | 1 | 0 | 0 |
| NM_181879 | 1 | 1 | 1 | 1 | 0 | 1 |
| NM_181885 | 1 | 0 | 1 | 0 | 0 | 0 |
| NM_181893 | 1 | 1 | 1 | 1 | 0 | 0 |
| NM_181894 | 1 | 0 | 1 | 1 | 0 | 0 |
| NM_181897 | 1 | 0 | 1 | 0 | 0 | 1 |
| NM_181900 | 1 | 0 | 1 | 0 | 0 | 0 |
| NM_181985 | 1 | 1 | 1 | 1 | 0 | 0 |
| NM_181986 | 1 | 1 | 1 | 1 | 0 | 0 |
| NM_182398 | 1 | 1 | 1 | 0 | 0 | 0 |
| NM_182470 | 1 | 1 | 1 | 1 | 0 | 0 |
| NM_182471 | 1 | 1 | 1 | 1 | 1 | 1 |
| NM_182480 | 1 | 0 | 1 | 1 | 0 | 0 |
| NM_182481 | 1 | 0 | 1 | 0 | 1 | 1 |
| NM_182482 | 1 | 0 | 1 | 0 | 0 | 0 |
| NM_182484 | 1 | 0 | 1 | 0 | 1 | 1 |
| NM_182487 | 1 | 1 | 1 | 1 | 0 | 0 |
| NM_182488 | 1 | 1 | 1 | 1 | 0 | 0 |
| NM_182490 | 1 | 1 | 1 | 1 | 0 | 0 |
| NM_182491 | 1 | 1 | 1 | 0 | 0 | 1 |
| NM_182492 | 1 | 1 | 1 | 1 | 0 | 0 |

|           |   |   |   |   |   |   |
|-----------|---|---|---|---|---|---|
| NM_182493 | 1 | 0 | 1 | 1 | 0 | 0 |
| NM_182494 | 1 | 1 | 1 | 1 | 0 | 1 |
| NM_182495 | 1 | 0 | 0 | 0 | 0 | 1 |
| NM_182499 | 1 | 0 | 1 | 0 | 0 | 1 |
| NM_182501 | 1 | 0 | 1 | 1 | 0 | 0 |
| NM_182503 | 1 | 1 | 1 | 1 | 0 | 0 |
| NM_182504 | 1 | 0 | 1 | 1 | 0 | 0 |
| NM_182505 | 1 | 0 | 1 | 0 | 0 | 0 |
| NM_182507 | 1 | 0 | 1 | 0 | 0 | 0 |
| NM_182508 | 1 | 1 | 1 | 1 | 0 | 0 |
| NM_182510 | 1 | 0 | 1 | 1 | 0 | 0 |
| NM_182512 | 1 | 0 | 1 | 0 | 0 | 1 |
| NM_182513 | 1 | 0 | 1 | 0 | 1 | 1 |
| NM_182516 | 1 | 0 | 1 | 0 | 0 | 0 |
| NM_182517 | 1 | 0 | 0 | 0 | 0 | 1 |
| NM_182518 | 1 | 0 | 1 | 0 | 0 | 0 |
| NM_182519 | 1 | 1 | 0 | 0 | 0 | 1 |
| NM_182520 | 1 | 0 | 0 | 0 | 0 | 1 |
| NM_182521 | 0 | 0 | 0 | 0 | 0 | 1 |
| NM_182522 | 1 | 1 | 1 | 1 | 0 | 0 |
| NM_182523 | 1 | 0 | 1 | 0 | 1 | 0 |
| NM_182524 | 1 | 0 | 1 | 0 | 1 | 1 |
| NM_182526 | 1 | 1 | 1 | 1 | 0 | 0 |
| NM_182527 | 1 | 0 | 1 | 0 | 0 | 0 |
| NM_182528 | 1 | 1 | 1 | 1 | 0 | 0 |
| NM_182529 | 1 | 0 | 1 | 0 | 0 | 0 |
| NM_182530 | 1 | 0 | 1 | 0 | 0 | 0 |
| NM_182531 | 1 | 0 | 1 | 0 | 0 | 0 |
| NM_182532 | 1 | 0 | 0 | 0 | 0 | 0 |
| NM_182533 | 1 | 1 | 1 | 0 | 0 | 0 |
| NM_182534 | 1 | 1 | 1 | 1 | 0 | 0 |
| NM_182535 | 0 | 0 | 0 | 0 | 0 | 1 |
| NM_182536 | 1 | 0 | 1 | 0 | 0 | 0 |
| NM_182538 | 1 | 0 | 1 | 1 | 0 | 0 |
| NM_182539 | 1 | 0 | 1 | 0 | 0 | 0 |
| NM_182540 | 1 | 0 | 1 | 1 | 0 | 0 |
| NM_182541 | 1 | 0 | 1 | 0 | 0 | 0 |
| NM_182542 | 1 | 1 | 1 | 1 | 0 | 1 |
| NM_182543 | 1 | 1 | 1 | 1 | 0 | 0 |
| NM_182544 | 1 | 0 | 1 | 1 | 1 | 0 |
| NM_182545 | 1 | 0 | 1 | 0 | 0 | 0 |
| NM_182546 | 1 | 1 | 1 | 0 | 0 | 0 |
| NM_182547 | 1 | 0 | 1 | 0 | 0 | 0 |
| NM_182549 | 1 | 0 | 1 | 1 | 0 | 0 |
| NM_182550 | 1 | 1 | 1 | 0 | 0 | 0 |
| NM_182552 | 1 | 1 | 0 | 0 | 1 | 1 |
| NM_182553 | 1 | 1 | 1 | 1 | 0 | 0 |
| NM_182556 | 1 | 1 | 1 | 1 | 0 | 0 |
| NM_182557 | 1 | 0 | 1 | 0 | 0 | 0 |
| NM_182558 | 1 | 0 | 0 | 0 | 0 | 1 |
| NM_182560 | 1 | 0 | 0 | 0 | 0 | 0 |
| NM_182561 | 1 | 0 | 1 | 0 | 0 | 0 |

|           |   |   |   |   |   |   |
|-----------|---|---|---|---|---|---|
| NM_182562 | 1 | 1 | 1 | 0 | 0 | 1 |
| NM_182563 | 1 | 1 | 1 | 1 | 0 | 1 |
| NM_182564 | 1 | 1 | 1 | 1 | 0 | 0 |
| NM_182565 | 1 | 0 | 1 | 1 | 1 | 1 |
| NM_182566 | 1 | 1 | 1 | 1 | 1 | 1 |
| NM_182568 | 1 | 0 | 1 | 0 | 0 | 0 |
| NM_182569 | 0 | 0 | 1 | 0 | 0 | 0 |
| NM_182570 | 1 | 0 | 1 | 1 | 0 | 0 |
| NM_182573 | 1 | 0 | 1 | 1 | 0 | 0 |
| NM_182574 | 1 | 0 | 1 | 1 | 0 | 0 |
| NM_182575 | 1 | 0 | 1 | 0 | 0 | 0 |
| NM_182577 | 1 | 1 | 1 | 1 | 1 | 0 |
| NM_182579 | 1 | 0 | 1 | 1 | 0 | 0 |
| NM_182580 | 1 | 0 | 1 | 0 | 0 | 1 |
| NM_182581 | 1 | 0 | 0 | 0 | 0 | 0 |
| NM_182583 | 1 | 0 | 1 | 0 | 0 | 0 |
| NM_182584 | 1 | 0 | 1 | 0 | 0 | 0 |
| NM_182585 | 1 | 1 | 1 | 1 | 1 | 0 |
| NM_182586 | 1 | 0 | 1 | 0 | 0 | 0 |
| NM_182588 | 1 | 0 | 1 | 0 | 0 | 0 |
| NM_182589 | 1 | 0 | 1 | 1 | 0 | 0 |
| NM_182591 | 1 | 0 | 0 | 0 | 0 | 0 |
| NM_182594 | 1 | 0 | 1 | 1 | 1 | 0 |
| NM_182595 | 1 | 0 | 1 | 0 | 0 | 0 |
| NM_182596 | 0 | 0 | 1 | 0 | 0 | 0 |
| NM_182597 | 1 | 1 | 1 | 1 | 1 | 1 |
| NM_182599 | 1 | 1 | 1 | 1 | 0 | 0 |
| NM_182600 | 1 | 0 | 1 | 0 | 0 | 1 |
| NM_182603 | 1 | 0 | 1 | 0 | 0 | 0 |
| NM_182605 | 1 | 0 | 1 | 0 | 0 | 0 |
| NM_182607 | 1 | 0 | 1 | 1 | 0 | 0 |
| NM_182608 | 1 | 1 | 1 | 1 | 0 | 0 |
| NM_182609 | 1 | 0 | 1 | 1 | 0 | 1 |
| NM_182610 | 0 | 0 | 0 | 1 | 0 | 0 |
| NM_182611 | 1 | 0 | 1 | 0 | 1 | 1 |
| NM_182612 | 1 | 1 | 1 | 1 | 0 | 0 |
| NM_182613 | 1 | 0 | 1 | 1 | 0 | 0 |
| NM_182614 | 1 | 1 | 1 | 1 | 0 | 0 |
| NM_182616 | 1 | 0 | 1 | 1 | 0 | 0 |
| NM_182617 | 1 | 1 | 1 | 1 | 0 | 0 |
| NM_182619 | 1 | 0 | 1 | 1 | 1 | 0 |
| NM_182620 | 1 | 1 | 1 | 1 | 0 | 0 |
| NM_182621 | 1 | 0 | 1 | 0 | 0 | 0 |
| NM_182623 | 1 | 0 | 1 | 1 | 0 | 0 |
| NM_182625 | 1 | 1 | 1 | 0 | 0 | 0 |
| NM_182627 | 1 | 0 | 1 | 0 | 0 | 0 |
| NM_182629 | 1 | 0 | 1 | 1 | 0 | 0 |
| NM_182631 | 1 | 0 | 1 | 0 | 0 | 0 |
| NM_182632 | 1 | 0 | 0 | 0 | 0 | 0 |
| NM_182634 | 1 | 0 | 1 | 0 | 1 | 0 |
| NM_182635 | 1 | 1 | 1 | 1 | 1 | 1 |
| NM_182639 | 1 | 1 | 1 | 1 | 1 | 1 |

|           |   |   |   |   |   |   |
|-----------|---|---|---|---|---|---|
| NM_182640 | 1 | 0 | 1 | 1 | 0 | 0 |
| NM_182641 | 1 | 1 | 1 | 0 | 1 | 1 |
| NM_182642 | 1 | 0 | 1 | 0 | 0 | 0 |
| NM_182643 | 1 | 0 | 1 | 0 | 0 | 1 |
| NM_182644 | 1 | 0 | 0 | 0 | 0 | 0 |
| NM_182646 | 1 | 1 | 1 | 1 | 0 | 1 |
| NM_182648 | 1 | 1 | 1 | 1 | 1 | 1 |
| NM_182649 | 1 | 0 | 1 | 0 | 0 | 0 |
| NM_182659 | 1 | 0 | 1 | 0 | 0 | 0 |
| NM_182660 | 1 | 0 | 1 | 0 | 0 | 1 |
| NM_182664 | 1 | 0 | 1 | 1 | 0 | 0 |
| NM_182666 | 1 | 0 | 1 | 0 | 0 | 0 |
| NM_182678 | 1 | 1 | 1 | 1 | 0 | 0 |
| NM_182682 | 1 | 0 | 1 | 1 | 0 | 0 |
| NM_182683 | 1 | 0 | 1 | 1 | 0 | 0 |
| NM_182684 | 1 | 0 | 1 | 0 | 0 | 0 |
| NM_182685 | 1 | 1 | 1 | 1 | 1 | 1 |
| NM_182686 | 1 | 0 | 1 | 0 | 0 | 1 |
| NM_182688 | 1 | 0 | 1 | 0 | 0 | 0 |
| NM_182691 | 1 | 1 | 1 | 1 | 0 | 0 |
| NM_182699 | 1 | 0 | 0 | 0 | 0 | 0 |
| NM_182702 | 1 | 0 | 1 | 0 | 0 | 1 |
| NM_182703 | 1 | 0 | 1 | 0 | 0 | 0 |
| NM_182705 | 1 | 0 | 1 | 0 | 0 | 1 |
| NM_182715 | 1 | 0 | 1 | 1 | 1 | 0 |
| NM_182728 | 1 | 0 | 1 | 0 | 0 | 0 |
| NM_182739 | 1 | 1 | 1 | 1 | 0 | 1 |
| NM_182741 | 1 | 1 | 1 | 1 | 0 | 0 |
| NM_182744 | 1 | 1 | 1 | 1 | 0 | 1 |
| NM_182746 | 1 | 0 | 1 | 0 | 0 | 0 |
| NM_182749 | 1 | 0 | 1 | 1 | 0 | 0 |
| NM_182752 | 1 | 1 | 1 | 1 | 0 | 0 |
| NM_182753 | 1 | 0 | 1 | 0 | 0 | 0 |
| NM_182754 | 1 | 0 | 1 | 0 | 1 | 1 |
| NM_182755 | 1 | 1 | 1 | 1 | 1 | 1 |
| NM_182756 | 1 | 0 | 1 | 0 | 0 | 0 |
| NM_182759 | 0 | 0 | 1 | 0 | 0 | 0 |
| NM_182760 | 1 | 1 | 1 | 1 | 0 | 0 |
| NM_182762 | 1 | 0 | 1 | 0 | 0 | 1 |
| NM_182763 | 1 | 1 | 0 | 0 | 0 | 0 |
| NM_182765 | 1 | 0 | 1 | 0 | 0 | 0 |
| NM_182766 | 1 | 0 | 1 | 0 | 0 | 1 |
| NM_182767 | 1 | 0 | 0 | 0 | 0 | 0 |
| NM_182774 | 1 | 0 | 1 | 0 | 0 | 0 |
| NM_182780 | 1 | 0 | 1 | 0 | 0 | 0 |
| NM_182789 | 1 | 1 | 1 | 1 | 0 | 0 |
| NM_182790 | 1 | 1 | 1 | 1 | 1 | 1 |
| NM_182795 | 1 | 0 | 0 | 0 | 0 | 1 |
| NM_182797 | 0 | 0 | 0 | 0 | 0 | 1 |
| NM_182811 | 1 | 1 | 1 | 1 | 0 | 0 |
| NM_182812 | 1 | 1 | 1 | 1 | 0 | 0 |
| NM_182826 | 1 | 0 | 0 | 0 | 0 | 1 |

|                 |   |   |   |   |   |   |
|-----------------|---|---|---|---|---|---|
| NM_182827       | 1 | 0 | 1 | 1 | 0 | 0 |
| NM_182828       | 1 | 0 | 1 | 0 | 0 | 0 |
| NM_182829       | 1 | 0 | 1 | 0 | 0 | 1 |
| NM_182830       | 1 | 1 | 1 | 1 | 0 | 0 |
| NM_182833       | 0 | 0 | 0 | 0 | 0 | 1 |
| NM_182835       | 1 | 0 | 1 | 0 | 1 | 1 |
| NM_182838       | 1 | 0 | 1 | 0 | 0 | 0 |
| NM_182847       | 1 | 0 | 1 | 1 | 0 | 0 |
| NM_182848       | 1 | 0 | 1 | 1 | 0 | 0 |
| NM_182851       | 1 | 0 | 1 | 1 | 0 | 0 |
| NM_182854       | 1 | 0 | 1 | 0 | 0 | 0 |
| NM_182895       | 1 | 0 | 1 | 0 | 0 | 0 |
| NM_182898       | 1 | 1 | 1 | 1 | 0 | 0 |
| NM_182900       | 1 | 1 | 0 | 0 | 0 | 1 |
| NM_182901       | 1 | 1 | 1 | 1 | 0 | 0 |
| NM_182902       | 1 | 0 | 1 | 0 | 0 | 0 |
| NM_182904       | 1 | 0 | 0 | 0 | 0 | 0 |
| NM_182906       | 1 | 0 | 1 | 1 | 0 | 0 |
| NM_182908       | 1 | 0 | 1 | 0 | 0 | 1 |
| NM_182910       | 1 | 1 | 1 | 1 | 1 | 0 |
| NM_182917       | 1 | 1 | 1 | 1 | 0 | 0 |
| NM_182918       | 1 | 0 | 1 | 0 | 0 | 1 |
| NM_182920       | 1 | 0 | 0 | 0 | 0 | 1 |
| NM_182923       | 1 | 0 | 1 | 0 | 0 | 0 |
| NM_182925       | 1 | 1 | 1 | 1 | 0 | 0 |
| NM_182926       | 1 | 1 | 1 | 1 | 0 | 1 |
| NM_182931       | 1 | 0 | 1 | 0 | 0 | 0 |
| NM_182934       | 1 | 0 | 1 | 0 | 0 | 0 |
| NM_182935       | 1 | 1 | 0 | 0 | 0 | 1 |
| NM_182943       | 1 | 0 | 1 | 0 | 0 | 1 |
| NM_182948       | 1 | 0 | 1 | 1 | 0 | 0 |
| NM_182956       | 1 | 0 | 1 | 0 | 0 | 0 |
| NM_182964       | 1 | 0 | 0 | 0 | 0 | 1 |
| NM_182966       | 1 | 0 | 1 | 1 | 1 | 1 |
| NM_182970       | 1 | 0 | 1 | 0 | 0 | 1 |
| NM_182971       | 0 | 0 | 1 | 0 | 0 | 0 |
| NM_182972       | 1 | 1 | 1 | 1 | 0 | 0 |
| NM_182973       | 1 | 0 | 1 | 1 | 0 | 0 |
| R10311_RC       | 1 | 1 | 1 | 1 | 1 | 1 |
| R11316_RC       | 1 | 0 | 1 | 0 | 0 | 1 |
| R91034_RC       | 1 | 0 | 1 | 0 | 0 | 0 |
| R96610_RC       | 0 | 0 | 0 | 0 | 0 | 1 |
| RSE_00000015430 | 1 | 0 | 1 | 1 | 1 | 0 |
| RSE_00000016658 | 1 | 1 | 1 | 1 | 0 | 1 |
| RSE_00000018566 | 1 | 0 | 1 | 1 | 1 | 1 |
| RSE_00000024784 | 1 | 0 | 1 | 0 | 0 | 1 |
| RSE_00000027794 | 0 | 0 | 0 | 0 | 0 | 1 |
| RSE_00000028420 | 1 | 1 | 1 | 1 | 0 | 1 |
| RSE_00000043877 | 1 | 1 | 0 | 0 | 0 | 1 |
| RSE_00000067763 | 1 | 1 | 1 | 1 | 0 | 0 |
| RSE_00000073302 | 1 | 0 | 1 | 0 | 0 | 0 |
| RSE_00000092582 | 1 | 0 | 1 | 0 | 0 | 0 |



|                 |   |   |   |   |   |   |
|-----------------|---|---|---|---|---|---|
| RSE_00000110415 | 1 | 0 | 1 | 0 | 0 | 0 |
| RSE_00000113972 | 1 | 1 | 1 | 0 | 0 | 0 |
| RSE_00000118999 | 1 | 0 | 1 | 0 | 0 | 0 |
| RSE_00000122977 | 1 | 1 | 1 | 1 | 0 | 1 |
| RSE_00000133951 | 1 | 0 | 1 | 1 | 0 | 1 |
| RSE_00000137758 | 1 | 0 | 1 | 1 | 1 | 1 |
| RSE_00000153248 | 1 | 0 | 1 | 0 | 0 | 0 |
| RSE_00000153272 | 1 | 0 | 1 | 1 | 0 | 0 |
| RSE_00000154975 | 1 | 1 | 1 | 0 | 0 | 0 |
| RSE_00000160398 | 1 | 0 | 1 | 0 | 0 | 1 |
| RSE_00000162812 | 1 | 0 | 1 | 1 | 1 | 1 |
| RSE_00000200779 | 0 | 0 | 0 | 0 | 0 | 1 |
| RSE_00000203592 | 1 | 1 | 1 | 1 | 0 | 1 |
| RSE_00000206947 | 1 | 0 | 1 | 1 | 0 | 1 |
| RSE_00000212796 | 1 | 0 | 1 | 0 | 0 | 0 |
| RSE_00000228530 | 0 | 0 | 0 | 0 | 0 | 1 |
| RSE_00000232263 | 1 | 0 | 0 | 0 | 0 | 0 |
| RSE_00000246951 | 1 | 1 | 1 | 1 | 1 | 1 |
| RSE_00000248140 | 1 | 1 | 1 | 1 | 0 | 1 |
| RSE_00000262782 | 1 | 0 | 1 | 0 | 0 | 1 |
| RSE_00000273080 | 1 | 0 | 1 | 1 | 0 | 0 |
| RSE_00000296527 | 1 | 0 | 1 | 0 | 0 | 1 |
| RSE_00000297615 | 1 | 0 | 1 | 0 | 0 | 1 |
| RSE_00000338892 | 1 | 1 | 1 | 1 | 0 | 0 |
| RSE_00000343804 | 1 | 0 | 0 | 0 | 0 | 1 |
| RSE_00000370363 | 1 | 0 | 1 | 0 | 0 | 0 |
| RSE_00000386256 | 1 | 0 | 1 | 1 | 1 | 0 |
| RSE_00000386317 | 0 | 0 | 0 | 0 | 0 | 1 |
| RSE_00000388885 | 1 | 0 | 1 | 0 | 0 | 0 |
| RSE_00000399804 | 1 | 0 | 1 | 0 | 0 | 1 |
| RSE_00000431558 | 1 | 0 | 1 | 0 | 0 | 1 |
| RSE_00000478328 | 1 | 1 | 1 | 1 | 0 | 1 |
| RSE_00000513855 | 1 | 1 | 1 | 1 | 0 | 1 |
| RSE_00000517427 | 1 | 0 | 1 | 1 | 1 | 0 |
| RSE_00000523610 | 1 | 0 | 1 | 1 | 1 | 1 |
| RSE_00000531205 | 1 | 0 | 1 | 1 | 0 | 0 |
| RSE_00000551358 | 1 | 0 | 1 | 0 | 0 | 1 |
| RSE_00000563272 | 1 | 1 | 1 | 1 | 1 | 1 |
| RSE_00000563927 | 1 | 1 | 1 | 1 | 1 | 1 |
| RSE_00000565165 | 1 | 0 | 1 | 1 | 1 | 1 |
| RSE_00000568253 | 1 | 0 | 1 | 0 | 0 | 0 |
| RSE_00000570937 | 0 | 0 | 0 | 0 | 0 | 1 |
| RSE_00000573682 | 1 | 0 | 1 | 0 | 1 | 1 |
| RSE_00000578308 | 1 | 0 | 1 | 0 | 0 | 0 |
| RSE_00000578530 | 1 | 1 | 1 | 1 | 0 | 0 |
| RSE_00000580825 | 1 | 1 | 1 | 1 | 0 | 0 |
| RSE_00000581377 | 1 | 0 | 1 | 1 | 1 | 1 |
| RSE_00000582173 | 1 | 1 | 1 | 1 | 1 | 1 |
| RSE_00000595136 | 1 | 1 | 1 | 1 | 0 | 0 |
| RSE_00000595694 | 1 | 0 | 1 | 1 | 1 | 1 |
| RSE_00000600673 | 1 | 0 | 1 | 1 | 1 | 1 |
| RSE_00000601195 | 1 | 1 | 1 | 1 | 0 | 0 |

|                 |   |   |   |   |   |   |
|-----------------|---|---|---|---|---|---|
| RSE_00000602448 | 1 | 0 | 1 | 0 | 0 | 0 |
| RSE_00000613195 | 1 | 1 | 1 | 1 | 0 | 0 |
| RSE_00000621508 | 1 | 0 | 1 | 1 | 1 | 1 |
| RSE_00000623559 | 1 | 0 | 1 | 0 | 0 | 1 |
| RSE_00000625145 | 1 | 0 | 1 | 1 | 1 | 1 |
| RSE_00000626103 | 1 | 1 | 1 | 0 | 0 | 1 |
| RSE_00000626872 | 1 | 0 | 1 | 0 | 0 | 0 |
| RSE_00000636266 | 1 | 1 | 1 | 1 | 0 | 0 |
| RSE_00000647539 | 1 | 0 | 1 | 0 | 1 | 1 |
| RSE_00000650156 | 1 | 0 | 1 | 0 | 0 | 1 |
| RSE_00000658006 | 1 | 0 | 1 | 0 | 0 | 1 |
| RSE_00000658994 | 1 | 0 | 1 | 1 | 0 | 0 |
| RSE_00000667786 | 1 | 0 | 0 | 0 | 0 | 1 |
| RSE_00000670375 | 1 | 0 | 1 | 1 | 1 | 1 |
| RSE_00000674442 | 0 | 0 | 0 | 0 | 0 | 1 |
| RSE_00000675822 | 1 | 0 | 1 | 0 | 0 | 1 |
| RSE_00000676604 | 1 | 0 | 1 | 0 | 0 | 1 |
| RSE_00000708514 | 1 | 0 | 1 | 1 | 1 | 1 |
| RSE_00000714284 | 1 | 0 | 1 | 0 | 1 | 1 |
| RSE_00000727928 | 1 | 0 | 1 | 0 | 1 | 1 |
| RSE_00000733189 | 1 | 0 | 1 | 0 | 0 | 1 |
| RSE_00000734578 | 1 | 0 | 0 | 0 | 0 | 1 |
| RSE_00000739013 | 1 | 0 | 1 | 0 | 0 | 0 |
| RSE_00000745517 | 1 | 1 | 1 | 0 | 0 | 1 |
| RSE_00000746692 | 1 | 1 | 1 | 1 | 1 | 1 |
| RSE_00000753518 | 1 | 1 | 1 | 1 | 0 | 1 |
| RSE_00000769028 | 1 | 0 | 1 | 0 | 1 | 1 |
| RSE_00000772559 | 1 | 0 | 1 | 0 | 0 | 0 |
| RSE_00000801839 | 1 | 1 | 1 | 1 | 0 | 1 |
| RSE_00000802269 | 1 | 0 | 1 | 0 | 1 | 0 |
| RSE_00000807432 | 1 | 0 | 1 | 0 | 0 | 1 |
| RSE_00000807760 | 1 | 0 | 1 | 1 | 1 | 1 |
| RSE_00000815403 | 1 | 0 | 1 | 1 | 0 | 1 |
| RSE_00000821979 | 0 | 0 | 0 | 0 | 0 | 1 |
| RSE_00000840432 | 1 | 0 | 1 | 0 | 0 | 0 |
| RSE_00000862609 | 1 | 0 | 1 | 0 | 0 | 0 |
| RSE_00000869094 | 1 | 1 | 1 | 1 | 0 | 1 |
| RSE_00000869296 | 1 | 1 | 1 | 1 | 1 | 1 |
| RSE_00000869470 | 1 | 0 | 1 | 0 | 0 | 1 |
| RSE_00000869609 | 1 | 1 | 1 | 1 | 0 | 1 |
| RSE_00000871014 | 1 | 1 | 1 | 1 | 1 | 1 |
| RSE_00000872233 | 1 | 1 | 1 | 1 | 0 | 1 |
| RSE_00000873455 | 1 | 1 | 1 | 1 | 0 | 0 |
| RSE_00000873612 | 1 | 1 | 1 | 1 | 0 | 1 |
| RSE_00000873635 | 1 | 0 | 1 | 0 | 0 | 0 |
| RSE_00000874877 | 1 | 0 | 1 | 0 | 0 | 0 |
| RSE_00000878310 | 1 | 0 | 1 | 0 | 0 | 0 |
| RSE_00000888439 | 1 | 0 | 1 | 0 | 0 | 1 |
| RSE_00000890621 | 1 | 0 | 1 | 0 | 0 | 1 |
| RSE_00000890695 | 1 | 0 | 1 | 0 | 0 | 0 |
| RSE_00000907732 | 1 | 0 | 1 | 0 | 1 | 0 |
| RSE_00000915850 | 1 | 0 | 1 | 0 | 0 | 0 |

|                 |   |   |   |   |   |   |
|-----------------|---|---|---|---|---|---|
| RSE_00000929461 | 1 | 1 | 1 | 0 | 0 | 0 |
| S64472          | 0 | 0 | 0 | 0 | 0 | 1 |
| S66168          | 1 | 0 | 1 | 1 | 1 | 1 |
| S69136          | 1 | 0 | 1 | 0 | 0 | 1 |
| S72422          | 1 | 0 | 1 | 0 | 0 | 0 |
| S74639          | 1 | 0 | 1 | 1 | 0 | 1 |
| S75165          | 1 | 1 | 1 | 0 | 0 | 0 |
| S75180          | 1 | 1 | 1 | 1 | 0 | 1 |
| S75187          | 1 | 1 | 1 | 1 | 0 | 1 |
| S80864          | 1 | 0 | 1 | 0 | 1 | 1 |
| T83642_RC       | 1 | 1 | 1 | 0 | 0 | 0 |
| T90485_RC       | 1 | 1 | 1 | 0 | 0 | 1 |
| U00684          | 0 | 0 | 0 | 0 | 0 | 1 |
| U00945          | 1 | 0 | 1 | 0 | 0 | 1 |
| U00946          | 1 | 1 | 1 | 1 | 0 | 0 |
| U00948          | 1 | 0 | 1 | 0 | 0 | 0 |
| U00962          | 1 | 0 | 1 | 0 | 0 | 1 |
| U01925          | 1 | 0 | 1 | 1 | 0 | 1 |
| U03889          | 1 | 0 | 1 | 1 | 0 | 0 |
| U05597          | 1 | 1 | 1 | 1 | 0 | 0 |
| U06680          | 0 | 0 | 0 | 0 | 0 | 1 |
| U09410          | 1 | 0 | 1 | 1 | 1 | 1 |
| U09848          | 1 | 0 | 1 | 0 | 0 | 0 |
| U10508          | 1 | 1 | 1 | 1 | 1 | 1 |
| U12897          | 1 | 0 | 1 | 1 | 1 | 1 |
| U17626          | 1 | 0 | 1 | 0 | 0 | 0 |
| U17628          | 1 | 1 | 1 | 0 | 0 | 1 |
| U17639          | 1 | 0 | 1 | 0 | 0 | 0 |
| U20180          | 1 | 0 | 1 | 0 | 0 | 0 |
| U25752          | 1 | 0 | 1 | 1 | 0 | 1 |
| U28831          | 1 | 0 | 1 | 1 | 1 | 1 |
| U37028          | 1 | 1 | 1 | 1 | 0 | 0 |
| U37724          | 0 | 0 | 0 | 0 | 0 | 1 |
| U39123          | 1 | 1 | 1 | 0 | 0 | 1 |
| U39573          | 0 | 0 | 0 | 0 | 0 | 1 |
| U52827          | 1 | 1 | 1 | 1 | 0 | 0 |
| U52829          | 1 | 0 | 1 | 0 | 1 | 1 |
| U54734          | 1 | 0 | 1 | 0 | 0 | 1 |
| U59752          | 1 | 0 | 1 | 1 | 0 | 0 |
| U61096          | 0 | 0 | 0 | 0 | 0 | 1 |
| U63542          | 1 | 0 | 1 | 0 | 1 | 1 |
| U63785          | 1 | 1 | 1 | 1 | 0 | 1 |
| U68494          | 1 | 1 | 1 | 1 | 1 | 1 |
| U69127          | 1 | 1 | 1 | 1 | 1 | 1 |
| U78519          | 1 | 1 | 1 | 1 | 0 | 1 |
| U79242          | 1 | 1 | 1 | 1 | 0 | 0 |
| U79244          | 1 | 1 | 1 | 1 | 1 | 0 |
| U79257          | 1 | 1 | 1 | 1 | 1 | 1 |
| U79260          | 1 | 0 | 1 | 1 | 1 | 1 |
| U81002          | 1 | 1 | 1 | 1 | 0 | 1 |
| U82319          | 1 | 0 | 1 | 1 | 0 | 0 |
| U82616          | 1 | 0 | 1 | 0 | 1 | 1 |

|        |   |   |   |   |   |   |
|--------|---|---|---|---|---|---|
| U83115 | 1 | 1 | 1 | 1 | 1 | 1 |
| U84507 | 0 | 0 | 0 | 0 | 0 | 1 |
| U84510 | 1 | 0 | 1 | 0 | 0 | 0 |
| U84511 | 1 | 0 | 1 | 0 | 0 | 0 |
| U84521 | 1 | 0 | 1 | 0 | 0 | 0 |
| U84522 | 1 | 0 | 1 | 1 | 0 | 0 |
| U90902 | 1 | 1 | 1 | 1 | 0 | 0 |
| U90907 | 1 | 0 | 1 | 1 | 0 | 1 |
| U90916 | 1 | 1 | 1 | 1 | 0 | 1 |
| U91921 | 1 | 0 | 1 | 0 | 0 | 0 |
| U92981 | 1 | 0 | 1 | 0 | 0 | 0 |
| U93181 | 1 | 1 | 1 | 1 | 0 | 1 |
| U95031 | 1 | 0 | 1 | 1 | 0 | 1 |
| X00437 | 1 | 0 | 1 | 1 | 1 | 1 |
| X02592 | 1 | 0 | 1 | 1 | 0 | 1 |
| X15624 | 1 | 0 | 1 | 0 | 0 | 0 |
| X16282 | 1 | 0 | 1 | 1 | 1 | 1 |
| X17117 | 1 | 0 | 1 | 0 | 0 | 0 |
| X17653 | 1 | 1 | 1 | 1 | 1 | 1 |
| X52339 | 1 | 0 | 1 | 0 | 0 | 0 |
| X52893 | 1 | 1 | 1 | 0 | 0 | 1 |
| X52894 | 1 | 1 | 1 | 1 | 1 | 1 |
| X56210 | 1 | 0 | 1 | 0 | 0 | 1 |
| X57819 | 1 | 0 | 1 | 0 | 1 | 1 |
| X60188 | 1 | 0 | 1 | 0 | 1 | 0 |
| X61072 | 1 | 0 | 1 | 0 | 1 | 1 |
| X61080 | 1 | 1 | 1 | 0 | 0 | 0 |
| X63945 | 1 | 0 | 1 | 0 | 1 | 1 |
| X64986 | 1 | 0 | 1 | 1 | 0 | 0 |
| X64987 | 1 | 0 | 0 | 1 | 0 | 1 |
| X65705 | 1 | 0 | 1 | 0 | 0 | 0 |
| X65706 | 0 | 0 | 0 | 0 | 0 | 1 |
| X66087 | 1 | 1 | 1 | 1 | 1 | 1 |
| X68560 | 1 | 1 | 1 | 1 | 0 | 1 |
| X68698 | 1 | 0 | 1 | 1 | 0 | 0 |
| X68879 | 1 | 0 | 1 | 0 | 0 | 0 |
| X69115 | 1 | 0 | 1 | 0 | 1 | 1 |
| X72465 | 1 | 1 | 1 | 0 | 0 | 1 |
| X72475 | 1 | 0 | 1 | 0 | 0 | 1 |
| X73617 | 1 | 0 | 1 | 1 | 1 | 1 |
| X74818 | 1 | 0 | 1 | 0 | 0 | 0 |
| X75685 | 1 | 1 | 1 | 1 | 0 | 0 |
| X79984 | 1 | 1 | 1 | 1 | 1 | 0 |
| X80822 | 1 | 0 | 1 | 1 | 1 | 1 |
| X81005 | 1 | 1 | 1 | 0 | 0 | 0 |
| X81740 | 1 | 1 | 1 | 1 | 1 | 0 |
| X81747 | 1 | 0 | 1 | 0 | 0 | 1 |
| X85323 | 1 | 0 | 1 | 0 | 0 | 0 |
| X86104 | 1 | 0 | 1 | 1 | 0 | 0 |
| X86113 | 1 | 0 | 1 | 0 | 0 | 0 |
| X86141 | 1 | 0 | 1 | 0 | 0 | 0 |
| X89657 | 1 | 0 | 0 | 0 | 0 | 1 |

|        |   |   |   |   |   |   |
|--------|---|---|---|---|---|---|
| X89667 | 0 | 0 | 0 | 0 | 0 | 1 |
| X92108 | 1 | 0 | 1 | 0 | 1 | 1 |
| X97301 | 1 | 0 | 1 | 0 | 0 | 0 |
| X97444 | 1 | 1 | 1 | 1 | 0 | 1 |
| X98260 | 1 | 1 | 1 | 1 | 0 | 0 |
| X98261 | 1 | 1 | 1 | 1 | 0 | 0 |
| X98834 | 1 | 1 | 1 | 1 | 0 | 1 |
| X99687 | 1 | 1 | 1 | 1 | 0 | 1 |
| Y00790 | 1 | 1 | 1 | 0 | 1 | 0 |
| Y11160 | 1 | 0 | 1 | 1 | 0 | 0 |
| Y11161 | 1 | 1 | 1 | 1 | 0 | 1 |
| Y11162 | 1 | 1 | 1 | 1 | 0 | 1 |
| Y11324 | 1 | 0 | 1 | 0 | 0 | 1 |
| Y12337 | 1 | 0 | 1 | 0 | 0 | 0 |
| Y13807 | 0 | 0 | 0 | 0 | 0 | 1 |
| Y16700 | 1 | 0 | 1 | 0 | 0 | 1 |
| Y19237 | 1 | 1 | 1 | 1 | 0 | 0 |
| Z22679 | 1 | 0 | 1 | 1 | 1 | 0 |
| Z25431 | 1 | 0 | 1 | 0 | 0 | 1 |
| Z26834 | 1 | 1 | 1 | 1 | 0 | 1 |
| Z35126 | 1 | 0 | 1 | 0 | 0 | 0 |
| Z36778 | 1 | 1 | 1 | 1 | 1 | 1 |
| Z46619 | 1 | 0 | 1 | 0 | 0 | 0 |
| Z48314 | 1 | 0 | 1 | 1 | 0 | 0 |
| Z70255 | 1 | 0 | 1 | 0 | 1 | 1 |
| Z70717 | 1 | 1 | 1 | 1 | 0 | 1 |
| Z83936 | 1 | 0 | 1 | 0 | 0 | 0 |

**Supplementary Table 3**

| <b>GO Biological Process</b>                           | <b>size of GO term</b> | <b>overlap</b> | <b>p_value</b> |
|--------------------------------------------------------|------------------------|----------------|----------------|
| induction of apoptosis                                 | 719                    | 458            | 4.70E-09       |
| induction of programmed cell death                     | 722                    | 459            | 6.94E-09       |
| positive regulation of apoptosis                       | 815                    | 506            | 5.30E-08       |
| positive regulation of programmed cell death           | 821                    | 509            | 1.56E-07       |
| cell activation                                        | 721                    | 451            | 1.59E-07       |
| leukocyte activation                                   | 612                    | 384            | 4.48E-06       |
| positive regulation of developmental process           | 1031                   | 615            | 1.56E-05       |
| macromolecule localization                             | 1407                   | 819            | 2.74E-05       |
| induction of apoptosis by extracellular signals        | 132                    | 99             | 2.94E-05       |
| RNA processing                                         | 594                    | 369            | 4.93E-05       |
| cytokine production                                    | 417                    | 268            | 5.57E-05       |
| ribonucleoprotein complex biogenesis and assembly      | 303                    | 201            | 9.28E-05       |
| lymphocyte activation                                  | 484                    | 305            | 0.000114       |
| protein localization                                   | 1341                   | 773            | 0.000648       |
| establishment of protein localization                  | 1192                   | 692            | 0.000702       |
| T cell activation                                      | 333                    | 215            | 0.000785       |
| nucleocytoplasmic transport                            | 336                    | 216            | 0.001195       |
| protein transport                                      | 1164                   | 675            | 0.001227       |
| nuclear transport                                      | 339                    | 217            | 0.001798       |
| hemopoiesis                                            | 630                    | 381            | 0.001835       |
| immune system development                              | 676                    | 406            | 0.002263       |
| hemopoietic or lymphoid organ development              | 651                    | 390            | 0.005244       |
| RNA modification                                       | 60                     | 48             | 0.007188       |
| regulation of nucleocytoplasmic transport              | 88                     | 66             | 0.0076         |
| I-kappaB kinase/NF-kappaB cascade                      | 342                    | 216            | 0.007792       |
| mRNA metabolic process                                 | 388                    | 242            | 0.00828        |
| protein targeting                                      | 486                    | 297            | 0.008752       |
| intracellular protein transport                        | 737                    | 436            | 0.008787       |
| intracellular transport                                | 1182                   | 677            | 0.01194        |
| mitochondrion organization and biogenesis              | 199                    | 132            | 0.018546       |
| myeloid leukocyte activation                           | 157                    | 107            | 0.021234       |
| ncRNA processing                                       | 169                    | 114            | 0.023259       |
| regulation of intracellular transport                  | 101                    | 73             | 0.023285       |
| regulation of transcription factor import into nucleus | 62                     | 48             | 0.037924       |
| cytokine secretion                                     | 97                     | 70             | 0.038352       |
| regulation of protein import into nucleus              | 73                     | 55             | 0.039066       |
| regulation of intracellular protein transport          | 81                     | 60             | 0.040692       |
| transcription factor import into nucleus               | 67                     | 51             | 0.048169       |

## Supplementary Table 4

| Transcript_ID   |
|-----------------|
| AB033040        |
| AB040959        |
| AB051484        |
| AB051514        |
| AF052118        |
| AF103458        |
| AF147347        |
| AK000414        |
| AK000778        |
| AK022121        |
| AK023526        |
| AK058074        |
| BC001437        |
| Contig10004_RC  |
| Contig12508_RC  |
| Contig13480_RC  |
| Contig1667_RC   |
| Contig16786_RC  |
| Contig26081_RC  |
| Contig26674_RC  |
| Contig28226_RC  |
| Contig28319_RC  |
| Contig28762_RC  |
| Contig29509_RC  |
| Contig32137_RC  |
| Contig32322_RC  |
| Contig33760_RC  |
| Contig33979_RC  |
| Contig40530     |
| Contig41560_RC  |
| Contig43534     |
| Contig43613_RC  |
| Contig43703_RC  |
| Contig45195_RC  |
| Contig45786_RC  |
| Contig47308_RC  |
| Contig50979_RC  |
| Contig52405_RC  |
| Contig52525_RC  |
| Contig53804_RC  |
| Contig55487_RC  |
| Contig57903_RC  |
| Contig59090_RC  |
| Contig6273_RC   |
| Contig65401_RC  |
| ENST00000246000 |
| ENST00000298903 |
| NM_000032       |
| NM_000173       |

|           |
|-----------|
| NM_000235 |
| NM_000338 |
| NM_000426 |
| NM_000572 |
| NM_000576 |
| NM_000600 |
| NM_000681 |
| NM_000726 |
| NM_000874 |
| NM_000939 |
| NM_001078 |
| NM_001124 |
| NM_001192 |
| NM_001204 |
| NM_001423 |
| NM_001432 |
| NM_001505 |
| NM_001565 |
| NM_001721 |
| NM_001828 |
| NM_001853 |
| NM_001870 |
| NM_001901 |
| NM_001964 |
| NM_001999 |
| NM_002001 |
| NM_002089 |
| NM_002262 |
| NM_002395 |
| NM_002424 |
| NM_002522 |
| NM_002922 |
| NM_003246 |
| NM_003260 |
| NM_003530 |
| NM_003596 |
| NM_003683 |
| NM_003898 |
| NM_003944 |
| NM_004054 |
| NM_004119 |
| NM_004185 |
| NM_004267 |
| NM_004289 |
| NM_004666 |
| NM_004938 |
| NM_005252 |
| NM_005277 |
| NM_005319 |
| NM_005320 |
| NM_005618 |
| NM_005623 |



|           |
|-----------|
| NM_005649 |
| NM_005855 |
| NM_006226 |
| NM_006496 |
| NM_006564 |
| NM_006658 |
| NM_006770 |
| NM_006931 |
| NM_007035 |
| NM_007038 |
| NM_007085 |
| NM_012133 |
| NM_012334 |
| NM_013451 |
| NM_013958 |
| NM_013999 |
| NM_014505 |
| NM_014707 |
| NM_014897 |
| NM_014951 |
| NM_015286 |
| NM_015373 |
| NM_015991 |
| NM_016022 |
| NM_016081 |
| NM_016181 |
| NM_016269 |
| NM_016359 |
| NM_016364 |
| NM_016650 |
| NM_017644 |
| NM_018050 |
| NM_018215 |
| NM_019058 |
| NM_020152 |
| NM_020749 |
| NM_020828 |
| NM_021105 |
| NM_021156 |
| NM_021229 |
| NM_021620 |
| NM_021629 |
| NM_022746 |
| NM_024614 |
| NM_024680 |
| NM_025047 |
| NM_025212 |
| NM_030810 |
| NM_030926 |
| NM_030944 |
| NM_031200 |
| NM_032328 |

|           |
|-----------|
| NM_032515 |
| NM_033029 |
| NM_033427 |
| NM_052972 |
| NM_054014 |
| NM_080387 |
| NM_139266 |
| NM_144662 |
| NM_144698 |
| NM_145021 |
| NM_145651 |
| NM_152320 |
| NM_152421 |
| NM_152542 |
| NM_152765 |
| NM_152860 |
| NM_153000 |
| NM_153236 |
| NM_153252 |
| NM_153706 |
| NM_173625 |
| NM_182566 |
| NM_182686 |

**Supplementary Table 5a**

| Time point | Clinical trait | number of DE | number of correlated genes | overlap | p-value  |
|------------|----------------|--------------|----------------------------|---------|----------|
| 3          | ALAT           | 1874         | 367                        | 64      | 2.96E-05 |
| 3          | BMI            | 1874         | 673                        | 93      | 0.003167 |
| 3          | Diastolic      | 1874         | 114                        | 25      | 0.001739 |
| 3          | Systolic       | 1874         | 71                         | 19      | 0.000777 |
| 3          | Weight         | 1874         | 693                        | 101     | 0.000166 |
| 4          | BMI            | 1880         | 673                        | 121     | 5.08E-11 |
| 4          | HDLCHOL        | 1880         | 140                        | 27      | 0.009365 |
| 4          | INS            | 1880         | 379                        | 63      | 0.000208 |
| 4          | LEP            | 1880         | 487                        | 88      | 4.91E-08 |
| 4          | PBF            | 1880         | 401                        | 61      | 0.004336 |
| 4          | TAG            | 1880         | 149                        | 28      | 0.011368 |
| 4          | Weight         | 1880         | 693                        | 114     | 6.26E-08 |
| 5          | BMI            | 3571         | 673                        | 192     | 8.48E-11 |
| 5          | INS            | 3571         | 379                        | 96      | 0.005446 |
| 5          | LEP            | 3571         | 487                        | 134     | 2.11E-06 |
| 5          | TAG            | 3571         | 149                        | 50      | 0.000105 |
| 5          | Weight         | 3571         | 693                        | 194     | 2.15E-10 |
| 6          | ALAT           | 3589         | 367                        | 90      | 0.032124 |
| 6          | BMI            | 3589         | 673                        | 161     | 0.001478 |
| 6          | INS            | 3589         | 379                        | 97      | 0.004045 |
| 6          | LEP            | 3589         | 487                        | 122     | 0.001567 |
| 6          | TAG            | 3589         | 149                        | 49      | 0.000289 |
| 6          | Weight         | 3589         | 693                        | 164     | 0.002293 |
| 7          | ALAT           | 1260         | 367                        | 52      | 1.26E-06 |
| 7          | BMI            | 1260         | 673                        | 95      | 2.73E-12 |
| 7          | INS            | 1260         | 379                        | 70      | 2.55E-10 |
| 7          | LEP            | 1260         | 487                        | 63      | 1.53E-06 |
| 7          | TAG            | 1260         | 149                        | 21      | 0.017327 |
| 7          | Weight         | 1260         | 693                        | 90      | 1.24E-09 |

**Supplementary Table 5b**

| <b>Time point</b> | <b>Clinical trait</b> | <b>number of DC</b> | <b>number of correlated genes</b> | <b>overlap</b> | <b>p-value</b> |
|-------------------|-----------------------|---------------------|-----------------------------------|----------------|----------------|
| 2                 | Hip                   | 161                 | 2437                              | 37             | 0.0035532      |
| 3                 | BFM                   | 3227                | 2686                              | 799            | 1.77E-81       |
| 3                 | BLM                   | 3227                | 2726                              | 813            | 2.81E-11       |
| 3                 | CRE                   | 3227                | 798                               | 242            | 8.44E-10       |
| 3                 | GHR                   | 3227                | 2431                              | 735            | 2.15E-77       |
| 3                 | GLR                   | 3227                | 2504                              | 760            | 2.31E-81       |
| 3                 | GLUC                  | 3227                | 357                               | 119            | 1.84E-14       |
| 3                 | Hip                   | 3227                | 2437                              | 716            | 4.62E-69       |
| 4                 | BFM                   | 195                 | 2686                              | 56             | 5.29E-07       |
| 4                 | BLM                   | 195                 | 2726                              | 55             | 2.35E-06       |
| 4                 | GHR                   | 195                 | 2431                              | 56             | 1.10E-08       |
| 4                 | GLR                   | 195                 | 2504                              | 57             | 1.21E-08       |
| 4                 | Hip                   | 195                 | 2437                              | 52             | 9.95E-07       |
| 7                 | BFM                   | 840                 | 2686                              | 151            | 0.003003       |
| 7                 | BLM                   | 840                 | 2726                              | 156            | 0.0008736      |
| 7                 | GHR                   | 840                 | 2431                              | 136            | 0.00909632     |
| 7                 | GLR                   | 840                 | 2504                              | 138            | 0.0155207      |
| 7                 | Hip                   | 840                 | 2437                              | 137            | 0.00693428     |

**Supplementary Table 6**

| <b>Module</b> | <b>Module size</b> | <b>GO Biological Process</b>                                                         |
|---------------|--------------------|--------------------------------------------------------------------------------------|
| 1             | 721                | ubiquitin cycle                                                                      |
| 2             | 542                | embryonic development                                                                |
| 2             | 542                | keratinization                                                                       |
| 3             | 586                | mRNA metabolic process                                                               |
| 3             | 586                | mRNA processing                                                                      |
| 3             | 586                | ribonucleoprotein complex assembly                                                   |
| 3             | 586                | ribonucleoprotein complex biogenesis and assembly                                    |
| 3             | 586                | RNA processing                                                                       |
| 3             | 586                | RNA splicing                                                                         |
| 3             | 586                | spliceosome assembly                                                                 |
| 4             | 596                | RNA processing                                                                       |
| 7             | 274                | cytokine and chemokine mediated signaling pathway                                    |
| 7             | 274                | defense response                                                                     |
| 7             | 274                | response to bacterium                                                                |
| 9             | 215                | mRNA metabolic process                                                               |
| 9             | 215                | mRNA processing                                                                      |
| 9             | 215                | nuclear mRNA splicing, via spliceosome                                               |
| 9             | 215                | RNA processing                                                                       |
| 9             | 215                | RNA splicing                                                                         |
| 9             | 215                | RNA splicing, via transesterification reactions                                      |
| 9             | 215                | RNA splicing, via transesterification reactions with bulged adenosine as nucleophile |
| 10            | 115                | G-protein coupled receptor protein signaling pathway                                 |
| 10            | 115                | negative regulation of secretion                                                     |
| 12            | 161                | translation                                                                          |
| 13            | 155                | negative regulation of transcription                                                 |
| 19            | 23                 | cellular biosynthetic process                                                        |
| 19            | 23                 | translation                                                                          |
| 19            | 23                 | translational elongation                                                             |

| size of GO term | overlap | p_value     |
|-----------------|---------|-------------|
| 510             | 47      | 0.000971989 |
| 541             | 37      | 0.0227166   |
| 38              | 8       | 0.0446116   |
| 388             | 36      | 0.000143599 |
| 325             | 31      | 0.000646871 |
| 173             | 19      | 0.0174332   |
| 303             | 27      | 0.0135847   |
| 594             | 49      | 2.81E-05    |
| 336             | 34      | 4.02E-05    |
| 70              | 12      | 0.00891987  |
| 594             | 48      | 0.000127367 |
| 246             | 20      | 6.64E-06    |
| 1136            | 39      | 0.0120597   |
| 340             | 20      | 0.00140139  |
| 388             | 17      | 0.019182    |
| 325             | 16      | 0.00821955  |
| 175             | 11      | 0.0298349   |
| 594             | 23      | 0.00395624  |
| 336             | 17      | 0.00279531  |
| 175             | 11      | 0.0298349   |
| 175             | 11      | 0.0298349   |
| 1054            | 20      | 0.0498956   |
| 72              | 6       | 0.0192168   |
| 519             | 19      | 0.000991342 |
| 837             | 21      | 0.0494528   |
| 1423            | 10      | 0.0141082   |
| 519             | 10      | 1.03E-06    |
| 108             | 8       | 1.93E-09    |

**Supplementary Table 7**

| <b>Module</b> | <b>Module size</b> | <b>GO Biological Process</b>                                  | <b>size of GO term</b> |
|---------------|--------------------|---------------------------------------------------------------|------------------------|
| 1             | 1938               | establishment of protein localization                         | 1192                   |
| 1             | 1938               | establishment of RNA localization                             | 113                    |
| 1             | 1938               | intracellular protein transport                               | 737                    |
| 1             | 1938               | intracellular protein transport across a membrane             | 70                     |
| 1             | 1938               | intracellular transport                                       | 1182                   |
| 1             | 1938               | macromolecule localization                                    | 1407                   |
| 1             | 1938               | mRNA transport                                                | 90                     |
| 1             | 1938               | ncRNA processing                                              | 169                    |
| 1             | 1938               | nuclear transport                                             | 339                    |
| 1             | 1938               | nucleic acid transport                                        | 118                    |
| 1             | 1938               | nucleobase, nucleoside, nucleotide and nucleic acid transport | 146                    |
| 1             | 1938               | nucleocytoplasmic transport                                   | 336                    |
| 1             | 1938               | protein localization                                          | 1341                   |
| 1             | 1938               | protein transport                                             | 1164                   |
| 1             | 1938               | ribonucleoprotein complex biogenesis and assembly             | 303                    |
| 1             | 1938               | ribosome biogenesis and assembly                              | 140                    |
| 1             | 1938               | RNA localization                                              | 120                    |
| 1             | 1938               | RNA processing                                                | 594                    |
| 1             | 1938               | RNA transport                                                 | 113                    |
| 1             | 1938               | rRNA metabolic process                                        | 93                     |
| 1             | 1938               | rRNA processing                                               | 88                     |
| 3             | 636                | cell-cell signaling                                           | 1038                   |
| 3             | 636                | neurological system process                                   | 1123                   |
| 3             | 636                | tissue development                                            | 524                    |
| 4             | 556                | cellular biosynthetic process                                 | 1423                   |
| 4             | 556                | ribonucleoprotein complex biogenesis and assembly             | 303                    |
| 4             | 556                | T cell activation                                             | 333                    |
| 4             | 556                | translation                                                   | 519                    |
| 8             | 140                | ubiquitin cycle                                               | 510                    |
| 12            | 87                 | regulation of RNA splicing                                    | 25                     |
| 18            | 60                 | membrane budding                                              | 33                     |

| <b>overlap</b> | <b>p_value</b> |
|----------------|----------------|
| 181            | 0.0423122      |
| 39             | 1.46E-07       |
| 129            | 0.0005995      |
| 24             | 0.0007579      |
| 187            | 0.0021828      |
| 224            | 9.83E-05       |
| 29             | 0.0002227      |
| 44             | 0.0001829      |
| 65             | 0.032012       |
| 40             | 1.42E-07       |
| 42             | 1.56E-05       |
| 64             | 0.0460017      |
| 207            | 0.0032851      |
| 179            | 0.0222567      |
| 64             | 0.0012877      |
| 38             | 0.0004306      |
| 41             | 6.89E-08       |
| 113            | 3.92E-05       |
| 39             | 1.46E-07       |
| 29             | 0.000493       |
| 27             | 0.0018255      |
| 74             | 0.0001123      |
| 71             | 0.0172661      |
| 40             | 0.0322012      |
| 83             | 0.0002623      |
| 25             | 0.0456123      |
| 27             | 0.0294844      |
| 52             | 1.15E-09       |
| 15             | 0.0420748      |
| 4              | 0.0157921      |
| 4              | 0.0112541      |



**Supplementary Table 8**

| <b>module</b> | <b>size</b> | <b>trait name</b>              | <b>total correlated genes</b> | <b>correlated genes in the module</b> | <b>corrected p value</b> |
|---------------|-------------|--------------------------------|-------------------------------|---------------------------------------|--------------------------|
| 1             | 887         | Alanine aminotransferase (ALT) | 32                            | 7                                     | 0.0063319                |
| 2             | 675         | Diastolic Blood Pressure       | 470                           | 118                                   | 6.14E-10                 |
| 8             | 246         | Max Hip Circumference          | 22                            | 5                                     | 0.00011183               |
| 8             | 246         | Diastolic Blood Pressure       | 470                           | 136                                   | 8.72E-11                 |
| 9             | 236         | Diastolic Blood Pressure       | 470                           | 19                                    | 1.22E-05                 |
| 10            | 149         | Diastolic Blood Pressure       | 470                           | 28                                    | 7.13E-18                 |

**Supplementary Table 9**

| <b>module</b> | <b>size</b> | <b>trait name</b>              | <b>total correlated genes</b> | <b>correlated genes in the module</b> | <b>corrected p-value</b> |
|---------------|-------------|--------------------------------|-------------------------------|---------------------------------------|--------------------------|
| 1             | 2258        | Glucose                        | 22                            | 13                                    | 4.82E-07                 |
| 9             | 129         | Max Waist Circumference        | 93                            | 6                                     | 0.0005084                |
| 9             | 129         | Systolic Blood Pressure        | 151                           | 14                                    | 4.42E-12                 |
| 9             | 129         | Diastolic Blood Pressure       | 210                           | 11                                    | 9.31E-07                 |
| 11            | 112         | Max Waist Circumference        | 93                            | 18                                    | 7.84E-23                 |
| 11            | 112         | Systolic Blood Pressure        | 151                           | 18                                    | 7.83E-19                 |
| 11            | 112         | Diastolic Blood Pressure       | 210                           | 31                                    | 1.44E-10                 |
| 13            | 98          | Diastolic Blood Pressure       | 210                           | 11                                    | 5.11E-08                 |
| 15            | 106         | Alanine aminotransferase (ALT) | 12                            | 4                                     | 7.71E-06                 |
| 15            | 106         | Max Hip Circumference          | 15                            | 3                                     | 0.0016075                |
| 15            | 106         | Systolic Blood Pressure        | 151                           | 19                                    | 7.23E-21                 |
| 15            | 106         | Diastolic Blood Pressure       | 210                           | 57                                    | 1.01E-09                 |
